# Supplementary material for: Whole-brain comparison of rodent and human brains using spatial transcriptomics
Source: eLife. 2022 Nov 7;11:e79418. doi: 10.7554/eLife.79418 (PMC9708081; doi:10.7554/eLife.79418)
Supplement: Figure 1—source data 1. [file elife-79418-fig1-data1.csv]

HumanRegion	Cortical subplate-other	Claustrum	Endopiriform nucleus	Olfactory areas-other	Postpiriform transition area	Piriform area	Taenia tecta	Cortical amygdalar area	Piriform-amygdalar area	Main olfactory bulb	Accessory olfactory bulb	Anterior olfactory nucleus	Subiculum	Entorhinal area	Field CA1	Field CA2	Field CA3	Dentate gyrus	Anterior cingulate area	Infralimbic area	Retrosplenial area	Prelimbic area	Primary auditory area	Dorsal auditory area	Ventral auditory area	Agranular insular area	Ectorhinal area	Primary motor area	Secondary motor area	Frontal pole, cerebral cortex	Orbital area	Posterior parietal association areas	Perirhinal area	Primary somatosensory area	Supplemental somatosensory area	Temporal association areas	Visual areas	Pallidum	Striatum ventral region	Lateral septal complex	Caudoputamen	Medial amygdalar nucleus	Hypothalamus	Thalamus	Inferior colliculus	Superior colliculus, sensory related	Midbrain raphe nuclei	Midbrain-other	Periaqueductal gray
claustrum	0.06753337728510726	0.17105065009845535	0.13853055522449084	0.10014236938041263	0.06917674952662416	0.09174839382903285	0.04948886371855025	0.04102550158691276	0.02627182937603436	0.00703163685172596	0.05776038062255161	0.0806935481240502	0.07246258165783029	0.07731218464436224	0.0657242859186624	0.0655889428086311	0.06506933606262905	0.022172835916682256	0.06167054374541674	0.06976506628458945	0.005866469752070663	0.12667190328404507	0.07090327519303287	0.07038243449255412	0.08887762087719933	0.08180511277561657	0.14389822319800294	0.08017420289573583	0.07861182854488359	0.0741615071346991	0.13946709821790962	0.045073815790475376	0.107141218639196	0.053046469963881474	0.08430577311169415	0.12049002149790862	0.05299220471812419	-0.01956574251580138	0.05177420752799738	0.027746063637006105	0.05157811814753293	0.0296057788358706	-0.011006705735227862	-0.005712759984375053	-0.1059402716783667	-0.07803149321608725	-0.027356692417838602	-0.08535500983873497	-0.05674363339741093
dentate gyrus	0.14927366298789768	0.14251693234304583	0.161413297095822	0.11228954235344493	0.17733507334137782	0.17586129630559486	0.11817369734673568	0.11424448967447684	0.12206242259580538	-0.021534125435157016	0.04011909600901748	0.10773475035251535	0.046376494067863955	0.1446692336118894	0.224565521657517	0.22759678820668433	0.26828927202096675	0.2888963939238072	0.10276362219894884	0.1356849449240008	0.013524346936264503	0.162789754035234	0.10975064854318961	0.102322471044196	0.10841426163831681	0.081362529801842165	0.17655612426341433	0.0817493785902455	0.10959524935735036	0.09010345223196875	0.13798012245139527	0.10485906983740687	0.16969928343613874	0.055374327479399944	0.0879064855574554	0.15077522752330477	0.09049673469765701	-0.08001926102665012	0.09685259423284207	0.04775526337752223	0.06791430200984294	0.04791509737671465	-0.07311527480067563	-0.10738282622213008	-0.17866596599314866	-0.1403098968261977	-0.11288946709723059	-0.14891283788803703	-0.10091947274820216
CA1 field	0.1484346015699769	0.11173425752209533	0.1290279785793673	0.12094522617409081	0.1788341337380391	0.1504066271188869	0.11502812419491407	0.12019056582189178	0.09456303969203804	0.022888506615168714	0.06121971024048832	0.11720621408019109	0.15306534261939767	0.1849295801797025	0.30670890149949365	0.3012526500319301	0.26779791007175824	0.18424626332581104	0.13770712805023494	0.13608436002417057	0.06392435896405321	0.18620183289396822	0.10484872311557358	0.0987136232443717	0.10433521928379774	0.1164127012354943	0.1837217427606506	0.09221306305877429	0.12892888259748894	0.13053870119401498	0.14696092916575007	0.10940476975734523	0.19691909527793802	0.04826723981959637	0.06854566694952596	0.16496290407241138	0.09413224930421113	-0.06987318327372666	0.08575339141831877	0.08399523085919043	0.05619163813266522	0.03275033737501136	-0.0884932744812805	-0.13629765127703278	-0.16379849859839388	-0.15115947335545168	-0.0849840568337856	-0.17312121788477508	-0.13036098265892956
CA2 field	0.1318444212892162	0.09311306715484402	0.12083374777719191	0.10281318913165399	0.14351234470264354	0.12719223681347355	0.10261124146404367	0.09392145967659868	0.07844750898577343	0.006298730001873399	0.04293597295945681	0.10665464215164608	0.0977098039986403	0.15265238305851417	0.2582008147476047	0.2715062353577384	0.29567682880041957	0.15861923580187454	0.09695791592333634	0.12557843409876332	0.019731772243543746	0.15125842760682986	0.07265535347532132	0.06309978121826838	0.07360387616954492	0.09438146203256449	0.14875416712867376	0.08353121964492903	0.10418176841608935	0.09410831050821904	0.12776490766337295	0.04624519760335621	0.17173185848407785	0.037584710043772944	0.05147636515502429	0.11621966573817351	0.03546173062995293	-0.05320678142454575	0.04253614509836139	0.045691785264832564	0.0071934893279397005	0.014079058411167737	-0.06842397678565318	-0.08062367134964428	-0.12073176294143088	-0.12133587471159375	-0.07765043564242656	-0.10626514482060709	-0.094859833637726
CA3 field	0.12113078675591969	0.07625903689185771	0.09550619759357569	0.08719458596524968	0.13386206188282032	0.10550179108404646	0.08899189785697081	0.08362277889346054	0.070449288891517	0.002803051689081538	0.032269372834347033	0.0889113914023142	0.0702469581290053	0.12257831309535608	0.21342301392604937	0.22526585930122878	0.27843836830553026	0.1550328758523509	0.06573867343051953	0.1059203644618182	0.0034276230750373026	0.11100835758475561	0.05831777787212188	0.0505887814632246	0.056008777320324325	0.06837780402489588	0.11381368510279108	0.05303398553881045	0.07203938771719166	0.06735187794509369	0.09460130402496834	0.04182905460094676	0.13243131402443414	0.009977215596141273	0.020928801559229195	0.09007046909056245	0.026785773440226163	-0.04226893191959376	0.04810443689004264	0.049711356828402775	0.011970167654950816	0.02417266537502967	-0.035832448001504306	-0.052566137842556586	-0.10331062841726979	-0.08792110653868404	-0.05130976418081617	-0.07276267638965347	-0.05789635813695029
CA4 field	0.12074929119912235	0.040627126349425446	0.05247781411295889	0.07666777626112989	0.11541748757653772	0.06687979336622138	0.0838827032401379	0.08500077353757352	0.06417330625935454	0.04281745224995559	0.04284646965901441	0.0775726707834177	0.061501934554139825	0.0992349720924042	0.17240984248349908	0.1823693598347934	0.24039900193661712	0.16234358256959514	0.008455039463146177	0.09502111537391836	-0.019687258826870793	0.057211881620667815	0.01386830131905047	0.011059683323072955	0.01421542818146267	0.034549980184881895	0.05938466792903956	-0.01740128084274698	0.003256654878289541	0.03223676590018907	0.04489214743180163	0.020944478642452462	0.08065112238583498	-0.04996546340839289	-0.029591346902671387	0.04611392407463453	0.0014641287955140022	-0.015837842525776167	0.04959298525035666	0.07191196617640008	0.02309013821289835	0.059678454356601934	0.00616114909507164	-0.037770790509538625	-0.07679478268540141	-0.05373100977662727	-0.00816074643204299	-0.056208011114478026	-0.01813739198192018
subiculum	0.14638124692808654	0.1251157046400812	0.13991192648347114	0.12350130892725862	0.1334856287921655	0.13497438775647408	0.0954554504190938	0.09381823788875487	0.07311818798267038	-0.009085484473499085	0.05687769246087346	0.1107905426433688	0.19320895844086847	0.15514539406221103	0.24746755026842665	0.21331617330102173	0.18041822933651117	0.09789716708130862	0.1840191438660339	0.14191537997880546	0.11388046108959474	0.19787407303087823	0.12113673315326672	0.11030564040207536	0.13700638575365626	0.1175351960042424	0.18703966093406013	0.1413455644233782	0.167961903198365	0.12190478383724859	0.18746809045376334	0.10089977154543485	0.19506264629643014	0.09743150087964501	0.10669783464600946	0.17444840089836186	0.08381261103200076	-0.03057871927990023	0.046804313233353434	0.05734018661092163	0.009360272860340564	0.018804407716508216	-0.05523215005804733	-0.09779811241159615	-0.11375836034194933	-0.09606695800551689	-0.08889054634761837	-0.12176767920454484	-0.09280258313993128
cingulate gyrus	0.1819934851786139	0.2467014216219097	0.2744771723274144	0.19261779390215614	0.17067409021841948	0.2592315658067238	0.13098175189419745	0.12381180018398627	0.13346566757034298	-0.020427869836680573	0.09978453840025779	0.17618568294655346	0.2369472371682342	0.23092493614271736	0.20371445371422972	0.1714785569207962	0.1378389884425756	0.11842954068740248	0.3441011859222904	0.1850999969934725	0.23548993939531404	0.32356265002930096	0.29227368795085634	0.28768523302736193	0.30571563920039446	0.1942292189647538	0.3553328943022562	0.3087463109309769	0.3226687365804961	0.19836716473480429	0.29993103593262194	0.268596903341021	0.31558845032663724	0.2965045648244214	0.30673746356868536	0.33465176186539414	0.27141688023880256	-0.11593945003419627	0.029565636605592728	0.008814316157007097	0.016393521879907644	0.02831995306316952	-0.1645096894893503	-0.1729786028712306	-0.20870248456688803	-0.19137492523937696	-0.18954311273084887	-0.2687989245123153	-0.2135258984738893
parahippocampal gyrus	0.24938817551248027	0.2424567995766799	0.28844924902346303	0.19933664671521634	0.22905529024152027	0.2733567392773014	0.15990678404344422	0.1669406093895393	0.1569483075448813	0.018331306193547798	0.12935520887931273	0.18462880509138532	0.23641819147378387	0.2801500695565287	0.24559796307309226	0.2132102164282937	0.1936043503878763	0.17924622100563928	0.25725043808814657	0.20778638994988308	0.15093232210099852	0.30368843742045387	0.22619258209896526	0.21728066715836436	0.2489468349211837	0.16734192826802097	0.3377441294113396	0.20555841015186777	0.23500963291345406	0.1666670909626529	0.2651924163340572	0.21964317157544885	0.3358702083987667	0.17335938729807243	0.21714795374842227	0.31731711454043177	0.21292791416533724	-0.05575656414713021	0.08136554084701883	0.08104380626195473	0.055848353968118276	0.09287475205723632	-0.10003974026583044	-0.17651558697315553	-0.2077708879737611	-0.1750760185516299	-0.13644463157700373	-0.24911596223574173	-0.15680635600864318
piriform cortex	0.21484976578332363	0.11351002103998399	0.1594013296172523	0.15058910301774173	0.17288295274613333	0.17398525098290205	0.1349289096825729	0.16598550222315164	0.13790931990475003	0.07134812167171185	0.09946484243803161	0.12279025992156875	0.09639729037463056	0.1349585995501634	0.10424022758913168	0.08233103883228056	0.08363764158243317	0.11760163722102246	0.05292883616057939	0.14604533407617834	0.01825128210710715	0.14252530986772807	0.055391195922508074	0.04968599307247091	0.08035092757988613	0.0776227016488438	0.1469735125604156	-0.00498656313821097	0.030762526227462294	0.0742599270465717	0.12359707938061042	0.08196890199878137	0.13953045635356884	-0.028219522385546345	0.021161441678438676	0.13477410294043163	0.0626524593944869	0.039096531502149486	0.11178120076206613	0.11096491595407681	0.0645618469998576	0.15860737467794606	0.05196937294727977	-0.08974261246814548	-0.09810093657300058	-0.039617877637249166	-0.0018878698931598771	-0.09958770481581232	0.008216993299670836
anterior orbital gyrus	0.15709601684519217	0.22167988358910534	0.2606521277175274	0.15783307983771935	0.15098876991757526	0.24851435317775614	0.09191128114393214	0.1033153381300792	0.12191908274823154	-0.04476649951277695	0.07697344256264609	0.14125523048249575	0.20067565259305184	0.19534094298805887	0.18243094129132326	0.15979906656166437	0.11385408885130498	0.1044206919035481	0.32690947630503536	0.13026758672010622	0.21930076653094852	0.3059951773114544	0.2838412888107825	0.2835885848423045	0.29664004927135035	0.2009776965290053	0.3340443469023119	0.3107804069132195	0.32598732400592084	0.203880603556587	0.27726205550349353	0.24973324461746735	0.2907545581517621	0.3052031563878472	0.31027705233260594	0.31555163558877425	0.26722973445141396	-0.11062240320531042	0.032935656666048224	-0.007635217926536034	0.02221887856283955	0.009563767725719118	-0.16551615957829194	-0.15436705925344338	-0.18972147728891256	-0.16260584657404578	-0.17986030195488562	-0.24714731991506475	-0.2033176123257476
frontal operculum	0.14250636077781426	0.2437147647457511	0.2758866642601529	0.16437907893893033	0.14108211529057904	0.25872285635114645	0.1044077410093411	0.09020213039911074	0.11048281118936173	-0.0520643657208181	0.06780878847038622	0.15155158235063537	0.19037882679694268	0.1989153211339717	0.16892897445762348	0.14688423377045381	0.10308296432785409	0.07711849823831851	0.3259812679245648	0.14285395341516874	0.20957023087718465	0.30507560276635853	0.2823685750381504	0.28144880267604894	0.29445181700038603	0.19617405754775735	0.35004408359490125	0.3254481348701637	0.3314888075786793	0.20050621785491546	0.2866988602210201	0.2430617468452997	0.2983325473810523	0.3143573780238134	0.32300103811873615	0.3195203518106983	0.2590036233675996	-0.10892085753966504	0.03107579992031964	-0.02852345779767037	0.010975118371041646	-0.011825569588169178	-0.1720057265034018	-0.15595927129750822	-0.18095630879074834	-0.175877279539648	-0.17802258261018356	-0.23827165173728018	-0.21710452285021345
frontal pole	0.11339172515133311	0.18594406483870968	0.21495149390499102	0.14491773922622359	0.1364790122859412	0.21952231127042532	0.08617772798966071	0.08617247836024268	0.10826287192344736	-0.015953579920856702	0.08933269251272101	0.13839962995612265	0.18632980145465297	0.18010130714096076	0.15994447563701908	0.13892791414835445	0.09416519084021369	0.0969361645161789	0.2921512874418777	0.10912230078650949	0.2102967586991598	0.2671276125227745	0.2704331114979222	0.271302561473516	0.28185762843977574	0.16672256267753274	0.28865161024283686	0.2859648374351685	0.29423987109300953	0.18200005045633913	0.2447007961336995	0.24328514644018498	0.2529412459142439	0.2849585577176674	0.27949211896309095	0.2878758626826707	0.25725324696962815	-0.135497105849339	0.011418422953221105	-0.030847892935197945	0.0032629853513913795	-0.0058520761764729945	-0.18018762384816694	-0.14806528900902868	-0.16405140897274412	-0.15082821572393854	-0.1856655324170646	-0.23399161963981382	-0.20555686812696783
gyrus rectus	0.1902598882775761	0.22996574777584822	0.2726600818580869	0.16568203471815432	0.18757935689364763	0.2713640743115651	0.12001904831130356	0.1298533269089364	0.14470319922667063	-0.041364558006014976	0.0882296931847577	0.15393456577872613	0.19203225067220572	0.22969796406441537	0.18556466646593991	0.16046827341405273	0.12843729267864323	0.11925412757759819	0.3162629943587709	0.1583733510739538	0.1905934120859797	0.32443448919324774	0.28075362145588273	0.2795963951937723	0.28927560969409555	0.19165669583200265	0.3561341003572728	0.29086659247398733	0.31257122602483856	0.19377759152099092	0.2850196567436692	0.2545347363150522	0.3176452506165203	0.26992641844465975	0.2909893246081294	0.33451120650916416	0.26469682704524566	-0.09738026359477413	0.04755029572830207	0.007458623647873896	0.018007474126779586	0.038214880851368024	-0.1408855431370191	-0.17087849483245132	-0.19497625896141813	-0.168301757384016	-0.16378395602416204	-0.24488235739478786	-0.1817280002976604
inferior frontal gyrus	0.07775258400767339	0.19647662617241599	0.22463405864028127	0.12769767590046024	0.0944458220619552	0.2204125311929866	0.06771005541238648	0.0550833187737262	0.08824004579944406	-0.06994051223777906	0.04029431416856738	0.11841199439327453	0.17042762623943605	0.14699880253882144	0.1365737199961299	0.1156359391411593	0.06550689108117108	0.038917349634640656	0.3232716855855697	0.10029901814582177	0.2304072577545095	0.25402049854259906	0.2817201339465652	0.27994673651512025	0.28746834316810416	0.1764439017007793	0.2956426825125263	0.3300081735219548	0.32587260930516104	0.18784350732595903	0.2475528577485572	0.22638197469881252	0.24378802547949335	0.3412443340160935	0.3280665053471401	0.281181717727504	0.2519897060345965	-0.12420069509568385	-2.576880578171636e-4	-0.06795195441091738	-0.012705646855638181	-0.05969356827033607	-0.19895981720948844	-0.1324333520693969	-0.14028024317343296	-0.1433998209223142	-0.1876553978973648	-0.20452009612146194	-0.21763304480245063
inferior rostral gyrus	0.1868532655637257	0.21017062978775902	0.2536951690356856	0.14967957563214296	0.18115241664667256	0.2549222351623392	0.11202990049885725	0.12818221285010203	0.1456810568988913	-0.044274804905417645	0.07682107285097185	0.13645516156977494	0.1835243085718587	0.22181585923306393	0.18204442264096887	0.1576189652128823	0.13175695020210274	0.11210599561992134	0.3056437664683754	0.15406026015280752	0.18862339369773584	0.30464102390955905	0.2647442509378454	0.2618011553013165	0.2743890903707878	0.1793284961192522	0.33554159590888766	0.27834845167040484	0.29825532304137775	0.1790605304585922	0.26783401124878425	0.24363982379014354	0.30556007050385164	0.2610822632305151	0.27749699056821925	0.3158525003467251	0.24699490583181472	-0.09274633689921477	0.03656795503776188	0.0019125229117787767	-0.004896345620277035	0.037045744619206296	-0.13282379119078883	-0.16021823016202777	-0.18668643075039584	-0.1611746900711327	-0.16581875984497726	-0.23063768213946267	-0.17195584979134185
lateral orbital gyrus	0.12197150837755355	0.21473463175454596	0.260100084997949	0.16206824968007277	0.13601151870110692	0.2587972179073091	0.09176054171932607	0.09059099622148652	0.11913188089649167	-0.044929568302101056	0.07432219068168813	0.1537412292757022	0.20165765450593512	0.18320448127770514	0.17186262258699303	0.1462194121612281	0.09064243856362843	0.08537000826620257	0.34476752855019466	0.1297844141232971	0.24860925861139063	0.29041299645320884	0.3126582590446496	0.30897078631932545	0.3173021659055899	0.19899326172233492	0.32883762673706796	0.33408016958893955	0.33932597571220835	0.21292131421993715	0.2740232238735703	0.26505308415603435	0.2761375468270393	0.3428629042952056	0.33436007806424645	0.31826777680303797	0.2908984790929374	-0.1300996838297779	0.033318823993155375	-0.028109468637767226	0.016959944823521807	-0.02887024416893506	-0.2114428187547157	-0.16738084116567573	-0.1776316046240927	-0.1699758896738817	-0.19975886672188536	-0.25244725196725293	-0.23760852457831605
medial orbital gyrus	0.17544807228832143	0.22506774353322104	0.2729665051659236	0.16453319328132693	0.17285300268165132	0.2738236614888134	0.11473611615380086	0.11919734645140492	0.1381501899373201	-0.04986413219855325	0.08209859951468275	0.1520563351748342	0.1944541246844507	0.22148935429196576	0.1801880420510182	0.15690110661607534	0.11577537273319646	0.10033104695486371	0.33367747045230095	0.1525562618199334	0.21158127266075666	0.3235849869224688	0.29201143800018736	0.29145034510149836	0.3022933012809924	0.1935892640775349	0.35424430419023595	0.312456503087039	0.3310087937263766	0.20132825291212586	0.2876754741256075	0.26221549283930956	0.3162047225463504	0.2969792230005435	0.30843297536100334	0.3353298332142694	0.2733110799835507	-0.10634822012770791	0.03507803235828164	-0.008787184748172397	0.007361646949277916	0.018877700136234292	-0.1576743155422329	-0.1619037325317769	-0.19061183192624986	-0.1676661752536895	-0.17490891318806606	-0.24465351421152845	-0.19924767384975814
middle frontal gyrus	0.0675206002702564	0.17838018806361083	0.20697922738701402	0.1274892641495123	0.0884301844340716	0.20616250896148158	0.06790295857715747	0.044872259322662124	0.08041535978494599	-0.07269394492127809	0.03771277295851716	0.11433598816669957	0.1797482585822932	0.1479564688021576	0.1502865119321172	0.13130568448007016	0.07902897313264859	0.03998686801158054	0.33223672072551674	0.10112800152393812	0.2439277698694728	0.2626067832545472	0.2835465722092108	0.2856129205545231	0.2912456572804387	0.18372567479068366	0.2935158910387308	0.3389086077866868	0.33743444559598484	0.1940130600722733	0.25362474846920163	0.22834649491773149	0.2487230507325399	0.34690948832416246	0.3271239918513021	0.28004321383559944	0.25600896260613576	-0.1391756547566472	-0.022310068929814304	-0.0821403836672757	-0.036290290405424426	-0.07105685146282165	-0.20569438888561287	-0.13355259649803722	-0.13060150992929281	-0.14118400644526152	-0.2005402565058903	-0.20312532427314764	-0.21678069967513067
paracentral lobule, anterior part	-0.014507239556297865	0.14557319320410253	0.15186325558573113	0.09691091085065176	0.015871073754667793	0.1388550221083268	0.0338980567706303	-0.018289490201766213	0.01926439842507525	-0.0740787245072705	-0.004533451626068376	0.09050245490521314	0.1303143933586234	0.06808880827412796	0.10853611412234025	0.09519301157993261	0.04206969403464453	-0.005191123075827182	0.279445455541529	0.06792872556493638	0.2174931093524078	0.18085727678966151	0.2256410856148785	0.22703442571744667	0.22869579824189695	0.14197329798534625	0.21211634573998975	0.31047025101416664	0.28590348004742205	0.1556467104987132	0.19502391123680954	0.15888571040882782	0.16146506028406304	0.32504835258328185	0.2868771793263406	0.1930894924149095	0.18811382043392064	-0.13540178938258382	-0.03870296367919109	-0.11194331189462678	-0.03815845552127445	-0.12851318744415693	-0.21911347111697588	-0.10546726899221791	-0.08637015381653389	-0.11717944214640469	-0.20148363691598428	-0.1439424517869115	-0.2055807187963594
paraterminal gyrus	0.21280975762201262	0.08963673551997886	0.09454659976049061	0.10893614714926558	0.1591398185783725	0.09584990003498645	0.12432662615358245	0.1500387157846946	0.11675882753062372	0.055789842197296664	0.08697854554861886	0.0796368658939591	0.11971505047850634	0.14679615902717644	0.09570626954829334	0.07550562892614877	0.0888565372507086	0.12122631834888155	0.07042591698373939	0.1550191005406683	0.03388219976239977	0.12980443747429357	0.05505229140194437	0.05239198531969925	0.06721783607078546	0.03555411769788869	0.12576072019688653	-0.015166186614252206	0.020244883468960855	0.03483936636535091	0.09614423566080098	0.11458952374282527	0.13193182987553592	-0.039552301836154206	-0.0021236204399658893	0.12934680719352157	0.0703287069945546	0.024742319704806212	0.07429976189963729	0.15479297634918593	0.05796748338466383	0.18095710329902007	0.07299172315994211	-0.09044167706674276	-0.13398816195755658	-0.06169735532535385	-0.018347125651841236	-0.1274080618461109	0.008783474355897535
parolfactory gyri	0.28283929114377443	0.2519569466466105	0.2929231454407203	0.1765491350460688	0.22293333722351158	0.26277918889885155	0.15059967935238708	0.1694522381216687	0.1539382122630348	-0.008761837502566896	0.1129136461104449	0.16302837133282702	0.1656982884765913	0.24097440764147396	0.20189221445441669	0.17726613151126253	0.17813645950951348	0.14551856165714344	0.245722067030161	0.2089977516457997	0.09490877373433228	0.3163026664947959	0.20191071226188784	0.19444443211861145	0.21902688455857627	0.15065294956363545	0.3380668786996474	0.19731339925584768	0.22963371538970795	0.14359785323534824	0.2701770269157273	0.19771537368735498	0.31872002573676517	0.14264543418751902	0.1926265215068852	0.3020276955479786	0.17520689522583	-0.011418444298135036	0.0860064630075677	0.09811236987382335	0.03815066057444883	0.13526857527310227	-0.020848585425107785	-0.14618832691226902	-0.21765047951334765	-0.1615610862924766	-0.0921869396367233	-0.2040034811592123	-0.10411649686212086
posterior orbital gyrus	0.14545845148223796	0.259299477443908	0.28816552242894383	0.17582385621518362	0.14161146537644	0.2512778861816624	0.09524243666097577	0.08644110644487907	0.10304525473914995	-0.04854706465531512	0.06829206885960028	0.16143655113684444	0.19220539899587516	0.19008748675191436	0.1880672594576841	0.1651556190779945	0.12071850136556646	0.09579937832834602	0.3148112755314059	0.13181508650201196	0.18455989809073486	0.3082244883389472	0.27502697132758197	0.2768265067616359	0.2925059376631978	0.19030255969549573	0.3362033254412683	0.3208414959548976	0.3237139880279961	0.20067992384066627	0.2880527023414982	0.2217837339135377	0.2887795048821222	0.30756086954228673	0.31634706222484316	0.3160058465855018	0.24326637735531634	-0.10471254560430883	0.045258217604203	-0.02202490246591374	0.03679743739913747	-0.004940267717593153	-0.18113295245962274	-0.14812018395131718	-0.19175173816401192	-0.18358415904353637	-0.18444176424801942	-0.24263951609052933	-0.2194977209784801
precentral gyrus	-0.057939118808657424	0.11684422575361446	0.11393842461493676	0.077491733132491	-0.0079846499537967	0.10506891977941284	0.015165781978598462	-0.040514565260253245	-0.0022410993439018275	-0.07432169991656286	-0.021784857194031382	0.07090729677509068	0.12071214801329958	0.045301431486246956	0.09508028495925921	0.08362601735612432	0.026440497295177605	-0.029871707864322312	0.2661740210310338	0.03820633354758888	0.21253642776882523	0.1539582404103766	0.21234005885211157	0.21707601049736464	0.21642070216242504	0.13521303684308603	0.18375613895470336	0.310832545622783	0.28153172184161757	0.14857667689715043	0.175718090583551	0.13764725959963253	0.13611050997583707	0.3293499322501638	0.2845180035977618	0.16854346584531732	0.17591226680075145	-0.15239438445436423	-0.06865163159622575	-0.14302229246554776	-0.05817644714817589	-0.1510479276556614	-0.22746905377767232	-0.09161182538417353	-0.05457906643960044	-0.10587596066662479	-0.19464095288596026	-0.12426160949835291	-0.20717072649256615
superior frontal gyrus	0.10041545342934838	0.2073544729402531	0.23375215401241634	0.1496804579888336	0.11680094658632917	0.22619457110408414	0.08536347665202228	0.06518410484061994	0.09569626662680444	-0.06279936850558618	0.051977547053585614	0.13563608563917637	0.19068082688816573	0.17387013867867585	0.17528724815070096	0.15566690979868306	0.10827084953722801	0.06638342595283621	0.34065760909511195	0.12641586841169652	0.23663702339139156	0.2929305738898022	0.28936797796216684	0.29128362079042136	0.3004628372384286	0.1912331632807997	0.32011964496729595	0.3403461089662778	0.3436288781561614	0.20017742997639287	0.2758376405117828	0.23712621267032644	0.2770077221274589	0.3379292944313324	0.3268723951531101	0.30247335891317323	0.26005562156074546	-0.14096377867126025	-0.010264721168048834	-0.06213820621068841	-0.019565311174684887	-0.04731319348732712	-0.20063835447844783	-0.14322127364810527	-0.15578090256677515	-0.16614863561570292	-0.2052775745668546	-0.22541857276118824	-0.2202634591814905
superior rostral gyrus	0.1878790192499205	0.21906550347116288	0.25981873414186357	0.1686257877756042	0.1685526419893766	0.25540065700368714	0.11910710324186402	0.11391840932646499	0.13304049528752612	-0.038693991310788496	0.08364290383125147	0.1503384684942254	0.19920039669224612	0.21417176539059302	0.19064123766223537	0.16486698946148123	0.13687043308776872	0.11823268508365438	0.326264507216191	0.15752372093375544	0.20961951858678227	0.32876065691390294	0.28138985153160995	0.2840288683428955	0.29444377739204713	0.19506108682910853	0.34455028582272873	0.29935382425896834	0.32379799603943343	0.20219533216908828	0.28763531703483997	0.26382069309312906	0.30881019046251307	0.2838656801024005	0.29469239627953714	0.3277092575797466	0.26689298088405566	-0.10667993804334858	0.03393901534990634	9.124980921249318e-4	0.0029382169135839767	0.039355028214346825	-0.14110707368489242	-0.15991448392728075	-0.1911420744671054	-0.16451117946082616	-0.16720527559233841	-0.2441421789607464	-0.18327530463846683
insula	0.21418264453452343	0.2723268946702837	0.3098568838244134	0.18960735036415768	0.20691933493258946	0.2959364290726819	0.13899483058154055	0.14285863226004653	0.15334351399295382	-0.03695114114763311	0.0956608292152103	0.16898575487465564	0.21185594268225674	0.24470875129060185	0.20978777340411991	0.18118377002196515	0.15455013652980548	0.139075252438647	0.3330859028534304	0.18036882518413727	0.2033999940980708	0.3437621341659448	0.2982991694424361	0.2936411442147476	0.3156517757948169	0.20946506297600798	0.3913611163416991	0.30553837834304176	0.32603257541358255	0.20569616442768182	0.31179269812876087	0.2720044394789547	0.344516321687767	0.2904126180993075	0.32065110947838515	0.36411175376081256	0.2752687022328084	-0.10277946093411966	0.06070114242388156	0.008978375395377082	0.026233865579391426	0.045234448832202276	-0.15040546164961185	-0.1809612047417684	-0.21716316742536873	-0.19119305590041774	-0.18121945752508342	-0.26847242505112545	-0.2103872715478547
cuneus	-0.09460657197485729	0.06356580129095261	0.07921461680255039	0.045238643874706004	-0.028435471232856054	0.09581783180478853	-0.018138739892931362	-0.05853528326236906	-0.01617466205920429	-0.05002160169294617	-0.019317187630539044	0.04708785047200203	0.0924536448699758	0.00934117584616001	0.07589750070929795	0.06283474194052147	0.011610866552541227	0.00742804149688706	0.21751308732696192	-0.02140405618549785	0.2299574810727614	0.09198465491510247	0.22322602939270464	0.22306128927301605	0.2162593481089899	0.10500078151730852	0.1193630540794949	0.2628141941115678	0.23660048176587153	0.12966473954214602	0.11170381286677578	0.1579827364046111	0.08077020359795459	0.3251207353872168	0.2663880554662965	0.14530899757328417	0.2079304275430289	-0.1708039873052952	-0.04319908380377395	-0.15436066647524066	-0.04531975832675911	-0.17534391985464895	-0.2496117256349162	-0.06820071145684321	-0.03530569965580895	-0.08410969845548512	-0.2005409681565847	-0.1259557516457969	-0.22116573688434343
inferior occipital gyrus	-0.028385992498168238	0.1321277542901191	0.15876011834532033	0.09596401477351202	0.030491811853969125	0.16931749420817171	0.024545803096504813	-0.0093212401659214	0.03711635304304942	-0.06837847383813991	0.007205256805262509	0.08545863379988008	0.14937817855264282	0.08043423118976543	0.11593529958149762	0.09287620250417293	0.03860933204304348	0.024757925092454232	0.2934524055040224	0.036626765895231186	0.2654259966408592	0.18076790355391004	0.2743135621929153	0.27189566054361874	0.269841944526403	0.16059793209161552	0.2186979113712225	0.3292946970021308	0.31322031509219106	0.18652014737340417	0.1899989213948721	0.21165970064856762	0.17025625201051867	0.3704102885109219	0.3261184534576264	0.2233034051871002	0.25342607143317897	-0.1726312157208185	-0.023510249477502677	-0.1317023875377227	-0.02557722200613385	-0.14451733719298648	-0.2656137321954739	-0.11034449529994723	-0.09536778567711834	-0.11857402659236523	-0.2226059836764877	-0.17782457970122414	-0.248074501077176
lingual gyrus	-0.0849939413101589	0.07746171692052858	0.09155412082905753	0.05565278704551223	-0.01553234440202242	0.10762752537185914	-0.004900204225127636	-0.045349754042392276	-0.004970334729139804	-0.041170836382873076	-0.005279433412222811	0.05597910452567358	0.10076234570282133	0.025936650245780166	0.07333561464469264	0.05818763914561742	0.005176471282763936	0.013327682657107324	0.22216872362820692	-0.007710147046541134	0.23728027469085425	0.09817120304730616	0.2323706335985774	0.22979175534355592	0.22553310005390004	0.10726106887629322	0.13079053849397818	0.25927251909655585	0.23445617582256278	0.13464154289298486	0.11592945786737748	0.17566502662301942	0.09184867782557904	0.32512408475775006	0.27155120558855517	0.15705412372615035	0.22223381812226228	-0.17767328484346454	-0.029455195625472157	-0.13849060706726937	-0.03154552048065324	-0.16888801035897785	-0.25857574565540126	-0.07613550816206535	-0.05224545545483897	-0.09959483358681634	-0.20915368265091172	-0.15131595415407642	-0.23302391293033767
occipital pole	-0.05199793865807083	0.06593494686311016	0.08592889092953754	0.05200047586623706	0.003935701798124091	0.11155414509768312	0.010793816247136536	-0.015530134020311977	0.021079735968402524	-0.04135111566503314	-0.006353978013445176	0.048430505492901905	0.08067074803683735	0.040954163881330864	0.07662228977215545	0.07032842533055889	0.02258830657521794	0.0076040862481551175	0.2200624801270837	0.004652426064966669	0.21855693987300306	0.10446753500220987	0.22594710313938918	0.22713144615270225	0.21442062935018055	0.10882444107086972	0.1412652542835718	0.24813018151433497	0.2326901419051852	0.12304856900548586	0.12076714978306372	0.17891652659171092	0.10854164131268944	0.29807758212536234	0.2498667016940372	0.15974196932708737	0.21203360621748013	-0.15849141439383801	-0.027542074437585686	-0.1381574690153921	-0.05491498367149325	-0.13706382723366983	-0.21625590941987397	-0.07256047996521635	-0.059623349587570124	-0.09268537776070467	-0.18231939206688558	-0.13781649421197126	-0.21368145420624124
occipito-temporal gyrus	0.040731839358770235	0.17845013128817216	0.21637771572256598	0.11736373666091836	0.08725443025154171	0.22495281279036694	0.05025934867832457	0.0348837580409936	0.07698321513217395	-0.07573118808941322	0.03301637601874961	0.11140883527274591	0.1704178142241333	0.13451270132375423	0.16137264956153421	0.13480479803278556	0.07864583007799551	0.06264622871676687	0.3310405653861691	0.0778201447201796	0.25730916284495553	0.24336726256668473	0.3041269665104286	0.30290823397858835	0.3029654762455036	0.17603061413231555	0.2852539832155993	0.34966858540378865	0.3422410895665444	0.2005866308433529	0.23291281061266747	0.23962434688933695	0.23783553629867527	0.37731561166455835	0.34730845581721126	0.28083996092066343	0.2805138084280902	-0.16314010126161985	0.002208126373975234	-0.0958515923681495	-0.0053119196643881825	-0.10775764080079432	-0.2618627806364687	-0.1392546914541252	-0.1390165145617577	-0.15479172198027485	-0.2280579719556051	-0.21912883664688318	-0.26207511798383726
superior occipital gyrus	-0.029737292401086746	0.1332869923088856	0.16714096962154779	0.10350121410536381	0.019616968513620558	0.1728440463796067	0.02438153764856851	-0.020994557579656226	0.02977017040178061	-0.06920952572397847	0.009748944501083122	0.09401109709496687	0.1512836103317061	0.07415791830760124	0.1288251148409012	0.10600908598162281	0.046296351663712966	0.02251755523646799	0.30731020030807615	0.04104077330587132	0.2723074374524519	0.19512841994648777	0.2837564170345761	0.2818828961799866	0.2786746416660979	0.16478623831528155	0.22254650425247752	0.3390009410140856	0.32472060542856246	0.1920481619982515	0.2046180622288219	0.21205110802742763	0.1744247978086234	0.3797428356046619	0.33124812291249744	0.22773665001673976	0.2576353067276323	-0.1686351228723819	-0.02572306416432103	-0.1330535373680444	-0.030275568767565902	-0.15634923718307245	-0.2716684838378333	-0.11391200766033209	-0.09644332426316404	-0.11960793048443957	-0.22725718205418097	-0.1745188831723207	-0.25093747740672434
inferior parietal lobule	0.046808177146787096	0.17047605996716853	0.20890792229222013	0.12188829743341885	0.07788878820958864	0.21513430493109512	0.05383129484534708	0.03060585891258863	0.07654245145866131	-0.07828790135310074	0.03248476375262305	0.1075834548706005	0.17384065367910723	0.13400314672490057	0.15689109720549044	0.13127314943731846	0.07952526313598086	0.05236089393871222	0.33619813143184857	0.09035205430095347	0.2665151856523728	0.2571496177112164	0.30017769087567875	0.29866483388263365	0.2987589839628602	0.18709996703656656	0.2902162885735754	0.34558208284311703	0.3447246659339287	0.20142099473156902	0.24519157185012389	0.24364372428854034	0.24347497827611903	0.3652494829837699	0.34022145930252085	0.2807118514995508	0.27696562594821167	-0.150121958342923	-0.007901839484020528	-0.09245651344470117	-0.02526470617190412	-0.10099159066868613	-0.23618874828776587	-0.1402162804470584	-0.13470332429831702	-0.14306965271940503	-0.21443919237263162	-0.2043623429279416	-0.23482421774261858
paracentral lobule, posterior part	0.034710406089685855	0.1439405358568606	0.1749524846569459	0.10423217113675931	0.06872194481159466	0.173511812655191	0.04036908255186146	0.025432074301644035	0.07122046257331886	-0.09835728767409059	-0.00520319897653888	0.08058642680610482	0.15365013495713714	0.10560856549747706	0.1412653571809636	0.11905730736705511	0.07275335684744959	0.02000944340468138	0.2945226712339667	0.07798902437487827	0.25172678542593185	0.22250159259039326	0.2720633326921935	0.275423469144475	0.27628428739064076	0.1642564757718565	0.24531010867943745	0.319335630543802	0.31379559671513196	0.17952001084497377	0.22208969423760552	0.20781591928680276	0.2147333682234574	0.3417906140864915	0.3053017889013781	0.24939448090542357	0.23584372211189059	-0.13799821748122265	-0.029772014171809386	-0.12501722932276985	-0.06856565275625617	-0.11528138471861386	-0.2130793981616965	-0.12167311876593712	-0.07625229879915263	-0.09979715555875233	-0.20389455833909367	-0.14140892144138642	-0.18918626671803815
postcentral gyrus	-0.0696939987086656	0.10243610189296608	0.11931866586192165	0.06433037382677577	-0.017832498997852792	0.11831451620008394	7.051573375707607e-4	-0.0481415995665575	-0.0030270574948448306	-0.07277849372594822	-0.01714663565395145	0.06593123722906559	0.11636956729425448	0.035792545721288975	0.08351422969222388	0.06677233484114824	0.010777187774792168	-0.004502559407586726	0.2612884822898283	0.017866782569772744	0.23174109732879922	0.13605386050341314	0.23145220570361894	0.22993713929410153	0.22529629958808148	0.12557032022326997	0.1716379110440032	0.30415937912234337	0.27553773808017024	0.14771070333367495	0.1529212634342852	0.16300047509474883	0.12116096222476459	0.342825376171194	0.2940571054776288	0.17002026770556422	0.20542062816985363	-0.14905943712326555	-0.041136163049946564	-0.1400247757276204	-0.04027938566002214	-0.16300433933122077	-0.24376137606441656	-0.09569009491513686	-0.05733999175709564	-0.10188109571114841	-0.1990521158740823	-0.13428087736364225	-0.2254245221060602
precuneus	0.029397945862965617	0.1713991948585982	0.19963009735181506	0.12224975924453156	0.06769181490702739	0.20001527314666448	0.050004510883891067	0.022983572019527845	0.06768707118498858	-0.07484528510644664	0.025765146278165636	0.10692058207742762	0.18184958685206543	0.12606248066952028	0.15722752918002392	0.13202117525008475	0.07574119016061492	0.05364253783457426	0.33672497068820234	0.07895013809582702	0.2776480558444462	0.24576818054604455	0.3015098774886846	0.3022365485711138	0.30170583960496944	0.18426919951123244	0.2754366045599184	0.35050053270097636	0.345221278109466	0.20138567555942183	0.23927446214988563	0.24322737034909112	0.2278878678677288	0.37691996694666524	0.3450476193986586	0.27211442138390274	0.27858942499483946	-0.1642849299982578	-0.009027727922040082	-0.10290005161746099	-0.018622304232374834	-0.1115506496813005	-0.2531836984157005	-0.13859273327921645	-0.13514798020700222	-0.14921472818450524	-0.23135799548594024	-0.2116217845966985	-0.24743509280811685
superior parietal lobule	-0.014374765940059361	0.13192970233064197	0.15428679056997488	0.09389628936570737	0.03417242308334179	0.16028017411912007	0.024226665962256533	-0.005010345984305721	0.039981001221570917	-0.08316456055754344	0.0026856033316384016	0.0798674486878336	0.16271638598563165	0.09141494840293965	0.13394198795018183	0.1110289681085438	0.054247913530906494	0.03070955776132532	0.3111902283644155	0.051075957977528993	0.2701238611478603	0.20459304046827928	0.27639742779913645	0.2791297787875818	0.2732249894779196	0.16709477309870516	0.2315882894076473	0.33494153228251666	0.3235783136947954	0.18425843478567	0.20535993283929874	0.21462512330965342	0.1884126700750751	0.3662255195729954	0.3248602194857811	0.23450990197044583	0.2565642641099808	-0.16440990969810135	-0.03525447569528104	-0.12575026538743186	-0.035227757977311445	-0.13314892552771893	-0.2544392563225522	-0.11716238836053264	-0.10217170897166233	-0.12459412910913775	-0.22286858085446412	-0.17867739234747423	-0.23492845558811506
fusiform gyrus	0.20697901792113946	0.24839758938473247	0.3023930651561377	0.17212473028558276	0.2064294899015906	0.30063467586426995	0.1303477283961397	0.13228021831695033	0.15217839143528142	-0.047872667688383164	0.08736742850305802	0.15243690722959033	0.19808941112781342	0.24461417862595466	0.22565180821114558	0.19679625191329678	0.17263712894093095	0.15033896607342598	0.31705173993270386	0.16502881057094143	0.18863268609907358	0.3335094069230168	0.2843002922784518	0.2800911422585699	0.29445855774792423	0.2032870887721252	0.37725944577199866	0.29734268734936725	0.3202903948599274	0.20743263446834315	0.2924123169914008	0.2569002718682269	0.3432988196983609	0.27683544364125023	0.30072817251663514	0.3442009639857098	0.2652577802961703	-0.10447428051905568	0.055237632405036374	4.2975069723729065e-4	0.026002589736737084	0.03482565160227306	-0.16067356687461362	-0.1808291664534926	-0.20519103388876458	-0.18673813677186352	-0.1742678693778315	-0.25417389834916587	-0.2028897196148538
Heschl's gyrus	0.01846394663999101	0.17849290901347917	0.20669860787926597	0.12047977194503606	0.060270721837234684	0.19501817924607392	0.03998212378479168	0.01365319564196395	0.05173462348967395	-0.06912250110895848	0.022877562482319848	0.11223127352886102	0.17593393442230057	0.11186170954911254	0.14543255767693525	0.11724120834408332	0.05622721345273196	0.05665387472865514	0.3086208465633954	0.06311645225174585	0.25589666086695856	0.21508508910360294	0.288675168253743	0.28276274600266144	0.2951437707448121	0.16449580307776815	0.2570659709170146	0.3361082066533979	0.316976839875527	0.18451294134327764	0.22844240914259917	0.22718709361295286	0.20561547331785157	0.3747147372369067	0.3452665357205446	0.2628164266656855	0.2652791578792318	-0.1533209128998353	0.001083300880902464	-0.10820350151487433	-0.0022498387449305674	-0.1171976478508848	-0.2580135640033674	-0.13918471927379	-0.11056361573495417	-0.13244599234253338	-0.21978773511556832	-0.20138856435736693	-0.259430656685322
inferior temporal gyrus	0.1678414865410189	0.23653139325163433	0.28785111727914603	0.17295247705696928	0.17939154321211292	0.29169365914355155	0.11405441733498176	0.11557482731132673	0.14584094017338753	-0.05104426067272858	0.0862401411716346	0.1537182365032261	0.2135213411482373	0.23157708329178445	0.21327443382374184	0.18327842963483132	0.14464467584590665	0.12161069191169081	0.348090581561275	0.15355465340451482	0.23754210593797537	0.33440219394398224	0.3139919130444137	0.31010483315846604	0.32321807867501423	0.21887361036536088	0.37534527529071604	0.3339887574713017	0.35147564648336593	0.22597721225873146	0.30472426733889135	0.27771966234035994	0.33669001467004256	0.3274800467445499	0.335859237562709	0.3533465108561712	0.2937353247428055	-0.1306619411691208	0.03678640462984523	-0.02872797051204588	0.006562332588326001	-0.004531344796633922	-0.19668302949511143	-0.18074361953062368	-0.20025825483086734	-0.18479723810769327	-0.2018744135070003	-0.26250978959656357	-0.22963626743051022
middle temporal gyrus	0.1247410251860333	0.22060328228213494	0.2663671530236893	0.16082072084152277	0.1447079984143361	0.26779930560064164	0.09481233018375443	0.0877649623693064	0.12243446210237689	-0.05376517052623174	0.07519467447098237	0.14593814679714612	0.20180489496455106	0.1968990862760005	0.1886776741859285	0.15860180864770315	0.11247441549253467	0.096805289062269	0.34526663034873195	0.13076870055268333	0.24524333534682874	0.3072382064363397	0.31254266645169965	0.30997774971643205	0.31993683135393	0.206040505276534	0.3471471190764246	0.34348972547508017	0.35143735553444905	0.21888450260858905	0.28595756737714517	0.26628455935961837	0.30204112998774957	0.34804723199395204	0.3444651588101582	0.33014903406986235	0.28922515155015416	-0.13754372239121823	0.023323480800337925	-0.048149249465979975	0.004821808462656985	-0.03463293307021563	-0.21463086405619033	-0.1667353022160573	-0.18128497808222163	-0.1753472451723615	-0.2074019868540762	-0.25058570151367676	-0.2432814756285565
planum polare	0.1814627661324182	0.2546135122972649	0.2986043603457084	0.1636291648263151	0.17694959939569774	0.2785389915316875	0.1086542612632938	0.11409340101582831	0.13241834472178554	-0.05089118402354442	0.07683893294974357	0.15124777732738934	0.19245070526107516	0.20914126300650568	0.20485555923399013	0.17581734042996072	0.14283622687808156	0.1385958538887462	0.312578369288322	0.14346859442531168	0.19294471905460603	0.309797535805318	0.2829151497565454	0.2771075821201342	0.2883677948548761	0.1970398379998429	0.35433688908357514	0.30196587279733256	0.3134058254815961	0.1999831491494985	0.2806767882100768	0.24904372010544001	0.3069142165621509	0.29087903602039294	0.30815127111924057	0.3271341355660732	0.2609885675877879	-0.09138791175741223	0.06168528838186465	4.85886192013027e-4	0.04579428538958302	0.02473108716347955	-0.15986023753536827	-0.17214256372677206	-0.20026721884203316	-0.179995181877089	-0.17112207937701515	-0.24162402671307423	-0.2138173464687561
planum temporale	0.05088011353707855	0.15675618242418465	0.1894120804793308	0.13566999379040987	0.0981508459674034	0.20292029916024987	0.08009397062040684	0.04762129590025067	0.08836607727899282	-0.05606043405937064	0.04942073242339028	0.11390541909221161	0.20624658497602996	0.1458397356444709	0.15169628566560966	0.1178351842675514	0.0657588595620531	0.07432113755736049	0.3288038058507108	0.1003269261916403	0.2762583829496274	0.24704762097775346	0.2991830074122303	0.2964861193623631	0.3016362836412193	0.1810884355953288	0.277202399310594	0.32253209275232214	0.3228261352392884	0.19961722632506332	0.244169489217898	0.2589134103007442	0.23015659201405145	0.3564648336944397	0.3283267223750711	0.2829241736042689	0.29439212424463085	-0.16019971110131598	-0.007299753851628208	-0.0878881549433441	-0.032510010438538815	-0.08155307475426306	-0.2399160031878792	-0.15764485785301513	-0.1235600468071322	-0.1282915926568477	-0.21915439499235398	-0.21926306297700673	-0.23832182381122138
superior temporal gyrus	0.10783582236701568	0.21557064403981785	0.2569150143249249	0.14988342250726353	0.12861006476803663	0.25584535631035843	0.08438927913028045	0.07339954590534242	0.11062384757465572	-0.0779910518709773	0.050339796612171514	0.13272727489019295	0.1923743895795023	0.17887564135537642	0.1824174990087142	0.15393149335053538	0.10609433736492206	0.07825941035711391	0.3499075675541172	0.11915442969217417	0.25317857120472237	0.29985871498036953	0.31204166966389707	0.3102936298307366	0.3155644678355827	0.2056384044787971	0.33571792822059365	0.35501587545369295	0.3603663493903185	0.21957448711907224	0.28279053655948744	0.26400072688687104	0.2894656050802075	0.3595059072807728	0.34726463631006077	0.32086288195200424	0.28649822262435065	-0.13628683407537787	0.017299199544569554	-0.06412350905949225	-0.0034871594883209354	-0.05719458018541177	-0.2226987172046789	-0.16173725744420606	-0.1683748296924725	-0.1621810436613672	-0.21021153610874843	-0.2306262122872662	-0.23895789412943821
temporal pole	0.2265567619675039	0.21858802353004791	0.2682058570651929	0.15687867699869074	0.21148944007802448	0.2703909342480517	0.12942550947997972	0.1450907315755969	0.14843348682851495	-0.0163514603571894	0.09637519747176587	0.14206551243438148	0.17677295625204031	0.2383057569136773	0.20261304321530746	0.17778902142427003	0.1689063711846202	0.15937217004964127	0.261785215500822	0.1663218002188433	0.13301367808893214	0.3033823338801195	0.22625035613636763	0.22329196527537007	0.23507758917915128	0.17701852751229932	0.3400398064560037	0.2205136944708342	0.25199661605841706	0.1684113253483749	0.25519873697043255	0.2197314497380455	0.31296263318916256	0.18638190649032685	0.2275898551204698	0.3061073857892931	0.21834439740367462	-0.06881106497911352	0.06646169290684076	0.04471386857306552	0.03596778666724482	0.08152051135324608	-0.09551613081941196	-0.17038330184307496	-0.19267845630582825	-0.16059112198448813	-0.12087620940311161	-0.2227021728336511	-0.14778272563649236
transverse gyri	0.02020235235649943	0.17364442672831304	0.19525656709727865	0.10906279072293605	0.053539410028327156	0.17523773534431908	0.041018130773488176	0.011902402310996426	0.044859144528493086	-0.07020064117318811	0.020760170978222043	0.09842577807333806	0.18040533617724905	0.10603567767612752	0.14354157012169041	0.11359119435154605	0.053999763798153924	0.06846289185383984	0.3029678259186931	0.06531258943389874	0.25672087935299687	0.20531617198657987	0.27929101757190317	0.28072532582680076	0.2808339187358211	0.14503337075997103	0.24364816023959077	0.3233250089165739	0.3051708599622965	0.1768743673872253	0.20556235216008648	0.2233952430991194	0.19207939830287576	0.3634601295287045	0.33048671548332786	0.25144361119322317	0.2651286687215263	-0.14943344972644634	-4.9359455210537e-5	-0.07840275345000346	0.02000869529076187	-0.09567987313905678	-0.24947947876327453	-0.13057634307848698	-0.12352434741651624	-0.13886098318706125	-0.2084912862877183	-0.21108515337906777	-0.25580939632532773
amygdala	0.26244627147809035	0.0719609911046439	0.11302647040146788	0.08582274816040232	0.19796402529990956	0.12346820059833581	0.11414052040020922	0.18090497744002212	0.13871272135468152	0.07106257355139818	0.09926582353240893	0.076588983567056207	0.041432293138614004	0.11469630690349664	0.10423431975039979	0.09086727691861324	0.11754134604508999	0.14390590600366332	-0.033997543577137954	0.13344384379265142	-0.06440965152377155	0.08211617462337825	-0.014985041524354658	-0.020687344255506356	-0.004073516097124224	0.02481509749454723	0.08830335720563902	-0.0917823718734473	-0.049521402285354746	0.02274951654590747	0.04542336303061621	0.03285170670355535	0.0968944646376647	-0.13144633468161063	-0.06529575376958592	0.0683298927721875	-0.006545065451204004	0.0978607412681417	0.16310811373591436	0.1999832649750115	0.11891933261556283	0.2218679873826119	0.11417871050016921	-0.09075511547688939	-0.0946278135788674	-0.025185190454154776	0.039829471343524485	-0.06049362350156632	0.056951121762591365
globus pallidus	-0.15959249705251774	-0.18852651093655406	-0.23787377091359002	-0.14092344447295624	-0.14220041176155926	-0.2356921697883323	-0.09147804270382959	-0.09575604214888332	-0.1154043039722131	0.07951708107009366	-0.050742113258568124	-0.12656766996976973	-0.15581334509745912	-0.1599971086436473	-0.15298776678636905	-0.13503077161829435	-0.11338457195524804	-0.0591532265481129	-0.28735324285507396	-0.13544106634624642	-0.19401902546766392	-0.27596125467540583	-0.26072684156359155	-0.2559085183527999	-0.2680874145464585	-0.17419424929108798	-0.29162209458651067	-0.27517014229298475	-0.29199621738572873	-0.17977967258238872	-0.26013286690085685	-0.21104936312260456	-0.264405515607837	-0.27293380682373863	-0.27377240663655056	-0.2819696056853507	-0.22273258764785564	0.0953984265286042	-0.02729612441520523	0.044649913558044214	0.038255049421490515	0.00891494171739469	0.1322890494434177	0.1204549057373477	0.1349869491266691	0.11191577167930153	0.15614550890444398	0.16500782956252733	0.14563237121135572
caudate nucleus	0.03877900128277025	0.12701425851246445	0.0557990577997573	0.0037698830805977168	0.04551390687131624	0.0025043183288873476	0.027897419247747135	0.04438519596261213	0.03925341273552528	0.022564645221421858	-0.002630731103880339	-0.004276610685386119	-0.09185571128892152	-0.04431604935846478	-0.007190973022818716	0.0059198540454612775	-0.012876711222920584	0.04095938873861433	-0.12182004622224275	-0.0019247977856893007	-0.11187939993628121	-0.06430856020420148	-0.08937428062291655	-0.07765400499066623	-0.09849309707007564	-0.01745619761969146	-0.045143278186060246	-0.1224450579600244	-0.10998130195299158	-0.010481968045258007	-0.059977064227062005	-0.048129299228840364	-0.0740103371371688	-0.11780383329066686	-0.07625127660068125	-0.06424556207283325	-0.051137178247014095	0.06267824133061775	0.3276652842688523	0.1609532318024563	0.42780038713510965	0.05333320649524537	-0.017689760556812262	-0.06495304299080243	-0.07309898857515115	-0.06748645909380876	-0.017524558888491068	-0.10711771079753449	-0.055809984472394956
nucleus accumbens	0.148744019445956	0.13831824475870136	0.09879165892836414	0.02282087589898906	0.10223150887142246	0.038945335204928586	0.055189533710733506	0.10161769049742338	0.07800501386385512	0.0146921099630863	0.015452665492648194	0.011883262997172512	-0.07194152739530589	0.006623254398035539	0.032595641536798746	0.03890244479552324	0.0386550755303376	0.08093996974745982	-0.11980321712245917	0.05229081830373168	-0.13324272057394776	-0.013913778780132115	-0.07870389489053636	-0.0791196678579682	-0.08242142278997522	-0.0155889315364508	-0.0025747589610530647	-0.14301763245481688	-0.1133734588729235	-0.01848951951390888	-0.025895041715646414	-0.03596881406781321	-0.015001027469648966	-0.15886386269072691	-0.09337515554351684	-0.02018190087085518	-0.06267440438406693	0.138490682545167	0.34680966546155045	0.22580003265366044	0.3887274795877376	0.13433574123665157	0.07317683835213706	-0.08243744356478333	-0.10263859573922937	-0.05239236280567384	0.021219465451947216	-0.08079784976621561	0.00971410824411108
putamen	-0.0125852219290053	0.10084701581653988	0.01928745942517798	-0.022840308917050103	0.0020467121561241622	-0.04338780933481503	0.001688656173970284	0.0069319433488104236	0.004516911370032977	0.027693102742171963	-0.015710017116275805	-0.025456375202102425	-0.11082816256285481	-0.08149040135279101	-0.03388368588709301	-0.020290785474107096	-0.03800984983269605	0.021751500798617204	-0.1546631238083227	-0.03035333642625599	-0.13099456078869423	-0.10973004825640754	-0.1209758950214782	-0.1087742202794125	-0.12883777014439038	-0.0456964716336964	-0.09423189622562164	-0.14473318468487528	-0.14397725487662863	-0.041684011344987816	-0.09668554364591682	-0.08440295087841053	-0.11994706185747442	-0.13568114764542433	-0.10085050093693006	-0.10763106452725148	-0.0822864931863204	0.06306302867226593	0.2960006839234054	0.14778691600797225	0.4150588649328962	0.02709574705408395	-0.014642146655462185	-0.03536942912191494	-0.0429271337990342	-0.04958479122478385	-6.999318558779745e-4	-0.07449436464445408	-0.04276593008743605
septal nuclei	0.12483738679608644	-0.04806582922740777	-0.055116252238716607	-0.03356997678959968	0.030338455507601978	-0.08248986381106442	0.02167831482410562	0.06799692671495755	0.01866737690728718	0.08560667245831224	0.019238720370008216	-0.026305648614844933	-0.07170191976406055	-0.046653614886374144	-0.04358639042179686	-0.039977469120686795	-0.0037154582294398795	0.040710685500102664	-0.2137514885955159	0.03661775462805428	-0.17729453324060662	-0.13151731446946274	-0.18102955700784715	-0.18533761339343283	-0.1752794736742375	-0.1194632339570518	-0.13963779873472137	-0.27060977492529215	-0.246295919490993	-0.13049599410105747	-0.1432753259049952	-0.12642482875150016	-0.11539920082588487	-0.2821276243511957	-0.23378141283009043	-0.1353694958786382	-0.16888398303285554	0.2071332298030238	0.13796979571319445	0.2960425346982191	0.11883370693753989	0.20022976378006171	0.2392715396476834	0.04375875351737765	0.02145936820262195	0.08828776652977974	0.15131961377810454	0.08436732810765077	0.17919517892565381
substantia innominata	0.09602608018463044	-0.06196060354384543	-0.06418131919442709	-0.05731252302407101	-0.0038008631982823535	-0.10166492832051205	-0.00335246909532485	0.041261669644832515	-0.006569033909280629	0.06688152479306517	0.0025352789445318726	-0.046921930382728266	-0.13187114757273433	-0.09153636862068867	-0.11811363817345379	-0.10649278537043082	-0.06622583388945766	-0.04519513840476674	-0.2728526962446969	-0.014472621739081605	-0.22677429531323445	-0.16986957783552273	-0.23002057804605175	-0.22908825397379912	-0.21847018631216883	-0.13329687923968245	-0.1833784820804852	-0.2928194631696995	-0.2762257053036858	-0.14897029442731183	-0.16212272595245583	-0.18967182071238783	-0.14950086451854364	-0.307090656470748	-0.2604215581351395	-0.18762123906465733	-0.22984493513747484	0.2879876874479365	0.15152873238388215	0.1957850671033552	0.13671534146640352	0.17879717230619105	0.29182000269549313	0.07142969774236316	0.07430865206757975	0.13986051195613258	0.2229764731167646	0.18503101578935371	0.2488418477895524
epithalamus	-0.008127369620549075	-0.17490863528189912	-0.20662810015229674	-0.08861002826950304	-0.049044177614779534	-0.183091479794011	-0.0287800921300452	0.015958570845211007	-0.03876592021715754	0.10892313415813566	-0.004415992719899256	-0.08630462874317628	-0.10995476647908888	-0.09337821614029891	-0.15121521923442777	-0.1388118085695075	-0.10037642019746315	-0.02279367131248239	-0.2662163031753603	-0.06674045800810181	-0.1678704821695164	-0.21525057401893538	-0.23369527527341552	-0.23281124461990443	-0.2351371171852254	-0.1434556257612417	-0.24098559872593991	-0.3082154707522787	-0.292748403200794	-0.160584915814714	-0.2146579998041556	-0.15107143626217656	-0.20670956970647883	-0.31162768434635624	-0.29121154930622856	-0.22167566516963952	-0.19146187911803653	0.11481139416096504	-3.2574362618756537e-4	0.10840662033332994	0.0010989202567001977	0.14716474542861951	0.2375314736680028	0.11576082109424919	0.09406643951239302	0.13636750321762442	0.18478200981064885	0.13802563827528763	0.22163639157602621
hypothalamus	0.1193288802993322	-0.13863978743168856	-0.13575301055041358	-0.09665377877051277	-0.006525832960520361	-0.1332082969454069	-0.021060544193418757	0.05833069804861053	-0.007432528895735241	0.0547133734554435	-0.01456985419210955	-0.08796549154460856	-0.1316144940449861	-0.08327353719295662	-0.15661218944009325	-0.15082468700219773	-0.10068655900067805	-0.07408970897585936	-0.2634446759359953	-0.031074883487238743	-0.21783699623761474	-0.16028630008106573	-0.2440098398526517	-0.24689893507391708	-0.23504712239440656	-0.14353927889433937	-0.19394675325674857	-0.30423262613446833	-0.27875437042588486	-0.1679931689553713	-0.18357842202877642	-0.1827590737119884	-0.15375116351044846	-0.33499016768809364	-0.2879964512338237	-0.19672354318218982	-0.23527275402038636	0.2826441836587785	0.05012832926939228	0.17916770671289237	-0.012403778538584745	0.2406897813726287	0.4067289578733147	0.09906022574875296	0.12834610424387027	0.20876462438478147	0.28063911457254853	0.25627646851126296	0.36157313676484387
subthalamus	-0.1947717257530791	-0.24771470886732297	-0.274485339717614	-0.16214932923765177	-0.1733195241728537	-0.26286052086418205	-0.12227992222774328	-0.12272695595086781	-0.14256864001633462	0.038902262580099004	-0.07336470588343372	-0.1441773448402859	-0.1716880646715474	-0.20376219069925516	-0.2245536819974984	-0.20476288927738107	-0.16572577436993047	-0.1505457676803081	-0.2981421969555043	-0.16346439169999272	-0.20071156296904072	-0.28152650814846136	-0.2819405312598587	-0.27613859499232163	-0.2844656465669788	-0.18146280796172531	-0.3329254736220943	-0.27651348776950657	-0.29201853684333956	-0.19567653390048015	-0.2650409622708471	-0.25649001530599613	-0.2917167100312041	-0.2838710692664898	-0.2976934438943035	-0.3112756532438672	-0.2640305814362511	0.11677255881625043	-0.09862998257850812	-0.027098475681723355	-0.06943235337347982	-0.036581158072250375	0.18136667529968645	0.1941534425826535	0.2356674723915736	0.22125589624587244	0.22339454865707944	0.3078883758661701	0.24559410656534986
thalamus	-0.18120446232205573	-0.24547108303484544	-0.2594348243522593	-0.17815497031550848	-0.19176617129515838	-0.2392985805346841	-0.14293778090349787	-0.13976387451353517	-0.15043901223232964	0.04942189118471867	-0.07101360974426049	-0.15641239644801397	-0.18820165456389945	-0.2033684575396746	-0.22886532385435565	-0.2046503135025552	-0.16877627713458235	-0.13470842540611533	-0.31968106950755376	-0.16462761888111543	-0.19652097745409547	-0.308622424116464	-0.28338274667234203	-0.28302715760391145	-0.2819339607559347	-0.18584785765680947	-0.332172219312582	-0.2983600894003589	-0.31858527549584986	-0.2042268402805482	-0.28279395823913994	-0.25560748629558616	-0.2788518729947075	-0.28340342659610557	-0.2911904995351622	-0.3152991907669296	-0.25773245330070166	0.10581158006184516	-0.09216054560361218	-0.020420604588586532	-0.056324366543540526	-0.02345651254503528	0.1710797123879213	0.37023702783510537	0.2552728523955659	0.2206236632591616	0.19383059117029813	0.2539965973634228	0.20899146159040516
inferior colliculus	-0.13681586046000216	-0.2095999935905563	-0.22592291984074514	-0.12324678915509209	-0.14724445180609866	-0.21840086391406618	-0.07878790270713702	-0.0841264184676925	-0.1020782682369383	0.06615133547597088	-0.04437014031956374	-0.12426615971838123	-0.13625735339335726	-0.19127126355934226	-0.21395616974350382	-0.1994392831615838	-0.1675844526397276	-0.11837815361304443	-0.27982094030126414	-0.1198398567202849	-0.14560380457687483	-0.2827959669462756	-0.23707797630345337	-0.2345897421517547	-0.24136605007762937	-0.15432944284782174	-0.3038942206833403	-0.27016951021131363	-0.2904012299528096	-0.17622428139241658	-0.24468400861386488	-0.2128688421584732	-0.277439050524247	-0.24434489200043977	-0.25293155840917314	-0.2827458257027376	-0.21776544812869691	0.11131394360001814	-0.033586843453426565	0.004644718982642142	-0.027340924703929525	0.010568031995238902	0.1640741906304974	0.13768883121003606	0.28556461807154554	0.23018117714697325	0.17286452546440817	0.2407098538412154	0.21339304840235448
superior colliculus	-0.11719918289009544	-0.2520160300310061	-0.25739102876613684	-0.17881688809273372	-0.16432834357359297	-0.2607109121422883	-0.11854751270728807	-0.09573983577078471	-0.13237861124308745	0.04473627435799166	-0.05584116198184515	-0.15925807799500707	-0.16934357132594943	-0.2113975124292421	-0.23521875914342633	-0.22279668661474594	-0.1804921559483721	-0.1237920158675544	-0.32938550692289975	-0.13682726924862573	-0.196213011479184	-0.3089336787668181	-0.3053731857989524	-0.306968466165963	-0.30797261020661304	-0.20102792916255893	-0.3491618062510535	-0.33234978865657455	-0.34338212236474275	-0.21567821132222018	-0.29224568653718896	-0.267729826361478	-0.30718667049677456	-0.3241655144565215	-0.31834050633539956	-0.3294023221856768	-0.28966280454030696	0.18679043445716492	-0.05639327914160461	0.05228978359739383	-0.04385540408096587	0.0521569411480401	0.2614445575572466	0.21198347378645127	0.270907540078195	0.3207496964070863	0.2532416110387718	0.33630824810212906	0.31997672618908424
midbrain tegmentum	-0.07410162577143732	-0.22620934779405188	-0.24909148700032566	-0.14549273546693495	-0.12195160958407446	-0.2408847084507751	-0.08336878991421122	-0.0542211621304899	-0.0938175366297784	0.06261058379911617	-0.05523635614511988	-0.13393353953894105	-0.17354449248552578	-0.18160860259915826	-0.2216461086143808	-0.20311663814359193	-0.15653486134478625	-0.12658222160581703	-0.3346624139036931	-0.11567376538869754	-0.23682411990697674	-0.27845669784450033	-0.3094803092413007	-0.31028994115122316	-0.3108722760468508	-0.18538029315798984	-0.3162902320341627	-0.34218638956865116	-0.343389024544154	-0.20767688144486485	-0.2657786213604961	-0.2624868475285364	-0.27974728618195405	-0.3569510934438517	-0.3415787440105122	-0.3125344340350619	-0.29577537299975154	0.20727801170343468	-0.03947068255668559	0.07625690800675813	-0.039265469664613986	0.09887424404600804	0.3003349722310659	0.15640119126643423	0.20216981520906935	0.232804598808334	0.29942663554968496	0.3193817868371437	0.32579790549827875
pretectal region	-0.08193747460373355	-0.22140819550460375	-0.2405851918442387	-0.15406572108323685	-0.13425980597985035	-0.25432445979085977	-0.09284068731056028	-0.06665614300499018	-0.10845929263527193	0.06953353946347043	-0.03638275093355133	-0.13512368593435917	-0.15005229423648983	-0.17986293633374553	-0.2007577918548018	-0.19286202809265734	-0.15665808886380053	-0.07926450029171411	-0.31445469725032027	-0.11918552909995413	-0.19851548457426044	-0.28122262774515244	-0.29283325059523146	-0.29082826800359174	-0.29357877302750124	-0.19397962921027168	-0.32652938537672155	-0.3277551210817973	-0.33252966701171405	-0.2096250243062497	-0.2684519524550038	-0.2413694215236658	-0.2875194717272018	-0.328135002803058	-0.3175908129254887	-0.30360933185127303	-0.26368953979549564	0.18268254392688718	-0.03742318390354623	0.0881179581756236	-0.015902939298060432	0.08993405777777547	0.2578068718233233	0.16338773527115585	0.21080756480187504	0.24963841650796276	0.23730006485105107	0.27786701766481825	0.2877691751701501
pons	-0.15283847169541415	-0.2708152057721303	-0.29395749067567556	-0.16736208967103042	-0.1806902336906101	-0.28232952702381986	-0.10046372157743948	-0.11065562442383912	-0.13257141401984185	0.03413194018896212	-0.08946577734385991	-0.15386429994572873	-0.19461453986725127	-0.2271443443149836	-0.25229530153315566	-0.2280219748317306	-0.1780457083246359	-0.1752348865476128	-0.3379031211476437	-0.1399045995595044	-0.2232122125392567	-0.3112041107470813	-0.3206781093256165	-0.3145297760760783	-0.3224188403656286	-0.20089787742485787	-0.3667640546612313	-0.3236930701668553	-0.3377314745402595	-0.21579605695114992	-0.2843220815366959	-0.2934911303930358	-0.3209788154096033	-0.32710390629260994	-0.3397064349946715	-0.35110030031214656	-0.3099817042854983	0.16765660064520824	-0.10092092592606458	-0.004844154958095531	-0.09888058118761828	0.026494808322818118	0.25169731553041746	0.17535745411470038	0.253855876337468	0.2500094726884198	0.26039630158630905	0.3535129781556413	0.31765529444563245
myelencephalon	-0.1362182010209585	-0.25850926242923816	-0.2888182087505491	-0.14678408570485244	-0.15545918198611944	-0.2683077957767814	-0.08384176188809403	-0.08178527973345429	-0.11593756136174234	0.07032491322556249	-0.0616866489256747	-0.13541846236179797	-0.17355946651749443	-0.20841274489346678	-0.24842147289321215	-0.22838461301888646	-0.1835113768356935	-0.1512199167281188	-0.33402620994220056	-0.13050940009422624	-0.2128318055432076	-0.3061818854969276	-0.3073016451219529	-0.301080544319594	-0.31071830677559137	-0.1932983612228627	-0.353440876828822	-0.330353921090342	-0.34148096574944836	-0.20751618318154083	-0.2801842773483023	-0.2630403876974394	-0.3142673922550174	-0.3292829379984025	-0.3326982306059874	-0.3364294360098178	-0.28480207184193723	0.1472135716842723	-0.08304818580122986	0.01773064349867618	-0.07441026641795014	0.05554872385686855	0.24284519997877368	0.1599360991647902	0.22473321131115817	0.22503273854742337	0.2430602408048602	0.29957898779625347	0.28565899459823035
vermal I-II	-0.13283846250220363	-0.1520657458461937	-0.17810130362072538	-0.14877395680925484	-0.11118224789900631	-0.16866240913022665	-0.10979559928012589	-0.08335708449889412	-0.08273669333219037	-0.0018262677041688844	-0.06162461137098445	-0.13436528376092807	-0.1520969752837996	-0.09356008717133589	-0.09819198781299998	-0.07267901089496598	-0.04902113528891744	-0.03673279367519586	-0.16154884966110236	-0.12838275723467477	-0.1218572243460392	-0.18003770741902014	-0.1354862022373229	-0.1378326459850541	-0.15422220504967266	-0.14898645841498115	-0.19157104301492306	-0.16286380692194344	-0.17296220388800837	-0.1496427606705466	-0.18082761664557886	-0.09896035739831058	-0.15621474073346767	-0.14798189414326793	-0.16142663520122777	-0.16184054083068503	-0.10795725342137935	-0.019758618376341137	-0.0807609777930653	-0.04305456489828831	-0.06699737713153583	-0.0673774913209092	0.01567982073778138	0.04577561418987783	0.0436759332077433	0.002689512450511203	0.0338506774465011	0.04900634669416524	0.030742522388464484
vermal III	-0.12321181197375361	-0.12950069088678573	-0.15711240499616333	-0.11732474398197218	-0.09958929015063364	-0.15442400952146365	-0.0879578191869354	-0.08142260346388948	-0.07839502593998204	-0.0011623415134801932	-0.04462140838802424	-0.10902723997135647	-0.13179223376382712	-0.08137824436249193	-0.0763843974647988	-0.05322204661971422	-0.030730858635106422	-0.018436083517025408	-0.13929210823382884	-0.10907781857066223	-0.10943385798407948	-0.14734409335819015	-0.10749165532807216	-0.10868311662079184	-0.12477233053512757	-0.12441150776286343	-0.16589676033148684	-0.1345237083851358	-0.14077154460041244	-0.11891424984346909	-0.14286641993436258	-0.07872232181813378	-0.1334064738175772	-0.12445506576340462	-0.13932529321940082	-0.1327933509497702	-0.08435417897960792	-0.04238038351869785	-0.07954728118807879	-0.05267012535484933	-0.07303228583587731	-0.06545279454439851	-0.004914669471457158	0.030064806912321943	0.032279188625242254	-0.006084711486566538	0.01654972408221989	0.03034973746829789	0.010545179981148381
vermal IV	-0.11317145404827231	-0.11511391380624382	-0.13888391795042454	-0.10834888628787466	-0.08729694174479247	-0.13768445406242077	-0.08200480641411222	-0.07430384312495987	-0.06922010527930988	-0.004671934236607996	-0.03427557223615654	-0.09907218235009886	-0.1260684734917893	-0.07091418590002971	-0.06134861336946757	-0.04023461218541734	-0.019734931859288988	-0.010050270603752815	-0.12867207899549796	-0.10002253257019202	-0.1070437104244646	-0.13275799056184845	-0.09368099163510728	-0.09702449389319265	-0.1093850285829819	-0.11396115324802178	-0.14816000982834301	-0.12345935032088938	-0.1300188728136526	-0.1096515490325039	-0.1264866392034817	-0.06999617611947143	-0.11665181359759098	-0.11437577499704193	-0.1276748612895287	-0.11674822086137486	-0.07651301830719515	-0.042638394440045774	-0.07384783502084365	-0.050428114014497954	-0.07113867836988665	-0.0669594386140399	-0.006586478364209948	0.03035986314124839	0.020563877163981312	-0.012621246763948414	0.007242922433511972	0.02664749374480462	0.008187569930551992
vermal V	-0.10973337583097915	-0.10842800874062149	-0.1315317046214327	-0.10424445034111621	-0.08679546537319882	-0.13300843847911312	-0.08043810986822786	-0.07628675986345261	-0.07125985481057473	-0.006200301065724681	-0.03159017086173221	-0.0949321244289082	-0.11860082497821761	-0.06814691983320524	-0.05817984219712612	-0.037621954413223815	-0.01694455822624593	-0.007688520839498132	-0.11911446580385983	-0.0966411681508433	-0.1021840012420391	-0.12612313580007176	-0.08774039037866002	-0.08986797328085473	-0.10288538520748669	-0.11009829338744093	-0.13951660631935062	-0.11262372673684623	-0.1191146025987218	-0.10605041855700026	-0.11790861850388211	-0.06446199255169038	-0.1091948379159707	-0.10342821436764942	-0.1172502494128642	-0.10912687568123665	-0.0703497101259511	-0.04603002384869629	-0.07586136261221785	-0.051269723553961706	-0.06991745176990852	-0.06483565877645187	-0.008846397970130275	0.027591232004445868	0.01646342513308079	-0.01352522712265444	0.0057896776179493905	0.026330092089327538	0.004538403105341742
vermal VI	-0.10831385352023849	-0.11583204769577357	-0.1371678146610299	-0.1102890249303615	-0.08256026837977799	-0.13427017220028903	-0.08084302101368644	-0.06799199601260426	-0.06299584427243639	-7.56295296359064e-4	-0.03196536600412975	-0.10045466217870863	-0.13136373982038943	-0.06509756919754113	-0.06554355664989733	-0.04362446580070787	-0.022728770518879306	-0.014585253335258324	-0.13409630249150184	-0.09801041738705778	-0.11128731785319226	-0.13664249956265948	-0.09915842875128722	-0.10270588261920832	-0.11586082031215836	-0.11907523531464798	-0.14882070827798413	-0.1307804030926123	-0.1358915763171765	-0.11566408969296789	-0.130179637184368	-0.07428684654754993	-0.1156518099457952	-0.12342313099597427	-0.13424281730853524	-0.11966147029793404	-0.08327679201588749	-0.03821943741644329	-0.0687457308733042	-0.04904609825486945	-0.0693920880441566	-0.06234535242821099	-0.001048431179380769	0.02436304839259236	0.013888765908159689	-0.016894280742216224	0.01165611089898859	0.02607494507485149	0.01162191400117595
vermal VIIAf	-0.10427646146237372	-0.1093170988738559	-0.13321274944286612	-0.10133829515479864	-0.07818156307634949	-0.1308523657742038	-0.07804253664213093	-0.06548656407686419	-0.06302533760173536	0.004683191255887772	-0.02463635558079088	-0.08813723364500477	-0.12339180768172342	-0.06042131140161084	-0.06376951005956052	-0.0440925509561963	-0.027154425042661308	-0.0153430631292027	-0.1199146901175116	-0.09239711805207919	-0.09949702483571653	-0.12871637669443456	-0.08674637046755508	-0.08908664661696372	-0.1030579878293382	-0.1126065153129983	-0.14215943488640118	-0.11716925161317182	-0.12268548201667875	-0.10459299555069723	-0.11957724588744872	-0.0600355768374958	-0.10703761285634003	-0.1074157069785671	-0.12086981716638169	-0.10808495512379773	-0.06830201972882603	-0.03923616627269075	-0.0698694210279994	-0.04398732810525824	-0.06532283917262917	-0.061514163987832965	-0.003085510526922496	0.02521828372047925	0.006133044377642649	-0.011558557072197249	0.0073544905125707445	0.02437578994496982	0.0056419089442574285
vermal VIIAt	-0.10543104180830466	-0.09891030072901165	-0.12387944826823905	-0.09749562136914058	-0.0784283501083392	-0.12760367232283418	-0.07850055545782157	-0.07361893356048899	-0.06520116160113897	-0.004886858347645518	-0.028969178919891248	-0.0886577134425095	-0.11921488398687376	-0.06267961870660572	-0.04527522035351622	-0.025111945187620232	-0.006565370493495607	-7.863196588708262e-4	-0.11180697751675307	-0.09108058330122798	-0.1028581222819973	-0.11132871951258248	-0.08209229107652113	-0.08283655911864544	-0.09773501556841226	-0.10134577817518131	-0.1295505521077655	-0.10343815021675087	-0.10883071170677945	-0.09488184510887226	-0.10687512356015022	-0.06412818220531019	-0.09977783690331705	-0.09931778894786678	-0.11103524932059304	-0.10135156903737463	-0.06723886441925979	-0.045381054380396184	-0.06858981474841441	-0.05147367896807598	-0.06359820276269793	-0.06499643009319837	-0.010269231172369078	0.01955201087143314	0.007287364376291038	-0.014145752757666647	0.0038526901313460007	0.02180366082961503	0.0034446247289316436
vermal VIIB	-0.11444788152624932	-0.11696157943545245	-0.14394754542673735	-0.11216374078550401	-0.09323310443649858	-0.14247093665572888	-0.08673117070127961	-0.07898207296167103	-0.07360535569162231	7.13293928179655e-4	-0.034610661451639074	-0.10025380381186377	-0.13301191497804302	-0.07766793747702853	-0.06763863916254169	-0.045172336178785695	-0.024396852705205363	-0.01264692311543648	-0.1310232465695971	-0.10383258467276706	-0.11163647871558285	-0.13833128144710674	-0.09966905422499889	-0.10116487635108964	-0.11800642948488271	-0.1165265805743161	-0.1514781481651324	-0.12577075156029294	-0.13258420879722108	-0.11527016066555862	-0.13275248606968357	-0.07384555280804377	-0.121065589128612	-0.11517773734512125	-0.12758747075952698	-0.12339877245884863	-0.0802265509399946	-0.039656527245872965	-0.07372501098398294	-0.04638253037062394	-0.06339135074838682	-0.06440238070327509	-2.627846639932314e-4	0.027500052017395388	0.016598787241393995	-0.014658715510659557	0.012928729677187676	0.024936475706256553	0.008721410038326674
vermal VIIIA	-0.10912143019938926	-0.10873188920239327	-0.13503399517271295	-0.10036050848876742	-0.08405044946268767	-0.13312854926865172	-0.07722093783603727	-0.0736984766369901	-0.06822768866291529	1.378817586075698e-4	-0.033463922547202304	-0.09240161432944526	-0.12660016272808947	-0.06771021303252567	-0.05836102142115536	-0.03666656891421344	-0.016566869687818384	-0.009800410207797863	-0.11896398055641624	-0.09758750707408649	-0.10366136208645892	-0.11987162690593982	-0.08640198388273113	-0.08796561163101498	-0.1042801754419504	-0.1065969874003416	-0.13766264756129115	-0.11232449677033629	-0.11721006346894698	-0.10311166856262954	-0.11574763811338408	-0.0632692093260973	-0.10881139032968852	-0.10638145371446996	-0.1180779914058014	-0.10796676626218889	-0.06779444153564826	-0.04769340640058782	-0.0719751374268075	-0.053942895012369645	-0.06924882240799092	-0.06317651744461172	-0.008554192135047912	0.023149265516678914	0.013478774643112148	-0.013310555288607551	0.007492836676049983	0.020091232142693153	0.003908101180274559
vermal VIIIB	-0.11742180567104435	-0.12640793396178077	-0.15081161823724756	-0.11218119245833015	-0.09720348280883778	-0.14656130384329205	-0.08665699363935955	-0.07842595831405863	-0.07477304596905805	0.007095808071400989	-0.03141916406144552	-0.10063326688957668	-0.1383630411412988	-0.07968306486823457	-0.07689013568854239	-0.054567244212024274	-0.03368251719955045	-0.019214624490022425	-0.14381228161364357	-0.10751669540105066	-0.1182898131657597	-0.14435582250319853	-0.10660290115411801	-0.10944297674799341	-0.12456812344709378	-0.11697601276001708	-0.15882751774629184	-0.13970585203817423	-0.14534374599713185	-0.11597184644235463	-0.13711609340995157	-0.07701720685916198	-0.12991851874758223	-0.12899839885403913	-0.13981565014440295	-0.13048347546167088	-0.08404077340945487	-0.0333969773263594	-0.07235799105069014	-0.047417708988870766	-0.06912672525972045	-0.06278583372650932	0.007970883678273739	0.028773628658425626	0.025796309357418445	-0.00597600286278447	0.02099519512608489	0.03294216883911011	0.01854928308252302
vermal IX	-0.10651140802167074	-0.11216209290850225	-0.1362796863201539	-0.10480269331372599	-0.08908208709136493	-0.13373828267557247	-0.08076168670406988	-0.07649550288618391	-0.07147443444881509	-0.00494549171480719	-0.038428138163748016	-0.09482660679567359	-0.13229714810521948	-0.07177437076614207	-0.06332317779513857	-0.04232234687158643	-0.02230188552300544	-0.015279275701394387	-0.1240395683689748	-0.10165579785904687	-0.11163330700404638	-0.12369910567003947	-0.09637408805564729	-0.09729094059562696	-0.11369880741881351	-0.10498791018269363	-0.13849147024211633	-0.11567511881265646	-0.1218075458674231	-0.10340615076951092	-0.11814818173364279	-0.07141502710682589	-0.11056387448238883	-0.11081066080577029	-0.12108262749385965	-0.11372516068260131	-0.076976540569378707	-0.033335612526441814	-0.0729652186577207	-0.04778098366304709	-0.06954010667676633	-0.059159827809041554	0.0076610950126131125	0.02992672911692572	0.019276102166056203	-0.007433926192806753	0.014459661869881362	0.03222426080722133	0.015093273530179434
vermal X	-0.11943080693973644	-0.15159204432529316	-0.1776899608979122	-0.13387246757524976	-0.09802977892610455	-0.15752739041365454	-0.09828818577581729	-0.07218405630460704	-0.06700447538180682	0.0022631135822580154	-0.05945070065314044	-0.1257102015198523	-0.14823035308397375	-0.08676595290312895	-0.0928977992131272	-0.068995108967228	-0.04525048495123792	-0.033059151407386314	-0.16362527912239785	-0.12248976990938493	-0.12461768106137912	-0.16041918164315924	-0.13312855591330178	-0.13310480098846783	-0.1517530736920963	-0.13310691945201494	-0.179232483569224	-0.16597629456585886	-0.16897624619414003	-0.13603920618265086	-0.16615682401135662	-0.09772625843263741	-0.14612550974818156	-0.15904941285228139	-0.16905354375975423	-0.15083108930958788	-0.10721738653553599	-0.01690623477320731	-0.07537163763898458	-0.042772279134840475	-0.07548262134661322	-0.050040526512349845	0.035311194427524145	0.03880687236673693	0.05142531068728861	0.012155262492111022	0.03579483431870171	0.052955460871556025	0.05043096374750592
III	-0.11453613833947252	-0.11661671027780797	-0.1361202442815743	-0.11402737215414804	-0.08987659347522868	-0.13841809382536835	-0.08561289567763358	-0.07940293649507725	-0.07275664723990612	-0.017565818896483038	-0.04727692359924392	-0.10283588441494103	-0.12766997903325533	-0.07048668201086537	-0.056797992798311187	-0.03709424258797927	-0.01762900635067254	-0.011743971917745661	-0.13072435552512274	-0.09933064562491549	-0.109030143559151	-0.13300952850074513	-0.09977284944089457	-0.104004547755559	-0.11716137365618265	-0.12076670783337662	-0.15311602405796187	-0.123947697739634	-0.1318465475162264	-0.11546619755170642	-0.12895615861311557	-0.07994515363814417	-0.11893284481381869	-0.11813858256936166	-0.1334654970029771	-0.12213793735868678	-0.08282944319943028	-0.03277809114898271	-0.07429951213852014	-0.048241606155261074	-0.06781834865949331	-0.07153991161081047	-0.0016503765630636008	0.03031189756109781	0.023299018318218314	-0.009510652685207743	0.015803753652692376	0.03789911028507326	0.0158859918803601
IV	-0.11366805495118262	-0.11390739444118872	-0.1387935817058505	-0.11348992291003271	-0.08715682832096479	-0.1428852340091569	-0.0839708793890223	-0.07800954539779982	-0.07342560820240807	-0.009682764171743722	-0.04416315848339187	-0.10380154711862175	-0.12093421155265409	-0.06860944423019885	-0.05467954187635347	-0.0344340531460261	-0.012246601627774013	-0.003309749906825558	-0.12762269422980171	-0.10040799445251264	-0.10929040598491598	-0.1304051096826705	-0.09837537392834783	-0.10077353359687029	-0.11471136460673902	-0.11986098376961621	-0.1511442469926362	-0.12244236483995036	-0.12941475122372695	-0.1134357379361096	-0.12854234471360446	-0.07702756404776462	-0.11702805921299242	-0.11709071311281746	-0.1303929640146473	-0.1182598505020296	-0.08041410841826173	-0.04265470107855681	-0.07690200168721856	-0.05123459852622667	-0.06743276672507385	-0.0658076544423698	-0.008665750509867481	0.029039890296170694	0.02028442505124501	-0.012837888693037501	0.012788284640507512	0.028990091130672913	0.0079535432815213
V	-0.10850213889982012	-0.10551485187414764	-0.126727464115757	-0.10752076643755881	-0.08355004620695214	-0.1312651155054065	-0.08100507546042925	-0.07702592808463286	-0.0711765490775847	-0.013270911876991056	-0.03573511504884846	-0.09686935477654812	-0.11989769005422032	-0.06419930398696888	-0.04996668089118949	-0.029974120468184127	-0.009389282707457303	-0.0040493479602776	-0.11799890845187293	-0.09332973726118382	-0.10546584455912088	-0.12027649417526984	-0.0878191308788824	-0.09144334437597063	-0.10365379806360273	-0.11167207140975088	-0.13662174027734153	-0.11081712599938012	-0.11707624029688123	-0.10601224603135787	-0.11696718504911181	-0.06940797078389264	-0.10557284571763771	-0.10492283850111739	-0.11770465863628599	-0.10786915356884073	-0.07279226704270922	-0.04355098094893771	-0.07352976084818519	-0.050521471792591865	-0.07025898449261297	-0.07048285621983981	-0.01211263006135881	0.026005995773268023	0.013330304069413773	-0.017815287566440633	0.005469692416788579	0.024361635818130944	0.003248741090590504
VI	-0.10314820556482834	-0.10520348587831521	-0.12539847425835052	-0.10317068867896624	-0.07852084724605993	-0.12706139024100918	-0.07683438169749113	-0.07112091840662964	-0.06631842842650809	-0.009232633635743363	-0.029542129343920653	-0.09275455539283882	-0.11985564582585141	-0.0599250371776969	-0.04916988945538733	-0.028849724559742457	-0.008122322093692924	-0.0028696791494830214	-0.1161196251609202	-0.09025519945460107	-0.10330955059691278	-0.11722345028749864	-0.08344856505829278	-0.08711146650598493	-0.0994381037532737	-0.10600346462919526	-0.13161046721456807	-0.10980213158496129	-0.1150088608481814	-0.10181747929947367	-0.11228822724952801	-0.06386365225657643	-0.10076439898275191	-0.10314068817134013	-0.11509865729729443	-0.10272737604925702	-0.06896292903179331	-0.04657228836977084	-0.0738093477107727	-0.05028933599983352	-0.0731822979784192	-0.06685336277247485	-0.011447349090932776	0.02602304533344147	0.006801976081897425	-0.020006248634719535	0.0019083069133981425	0.020233488291395253	0.002146965526990252
crus I	-0.10338141915452555	-0.10586736688678024	-0.12840315683436482	-0.10323769741930176	-0.07902006220048524	-0.1315866594138038	-0.07750761984249085	-0.07029126346484779	-0.0662948127546409	-0.0043987522043233696	-0.02810905323856312	-0.0926412180203657	-0.118392406351691	-0.06231566955572412	-0.04947109615406776	-0.029596595101640172	-0.008921979467017227	-0.0013054989500075659	-0.11812770319365279	-0.09136915760116532	-0.10525389880886406	-0.11940989987299251	-0.0863269744505628	-0.08887974620859819	-0.10244739496473439	-0.10684673044097083	-0.13421911279410983	-0.11149452945954991	-0.11696571428488547	-0.1022761561869131	-0.1143381722461578	-0.06658765303077269	-0.10386755240929219	-0.10528399684817978	-0.11682300200405409	-0.10496401360065181	-0.07044409062026548	-0.045622355487575	-0.07337976939970917	-0.047641735204137864	-0.07169746997722465	-0.06455573696688058	-0.009914448680224598	0.024681132226606072	0.006802403741300912	-0.016887073374895	0.0046659449912506	0.01997597583056851	0.00307757098531246
crus II	-0.10348641242987121	-0.10228204754576438	-0.12475717342892888	-0.0972681089786975	-0.08049552334486547	-0.12802467422396804	-0.07240955036497006	-0.07309517818546828	-0.06778700872142726	-0.005024799550893794	-0.029313380419876068	-0.08716529898820877	-0.11943704189675765	-0.06446406031099657	-0.04802982708728794	-0.028243055108732037	-0.007354124816051311	3.760039917368048e-5	-0.11428363079755482	-0.0873663764389801	-0.10658823639381107	-0.1140113582116002	-0.08560898365548696	-0.0876765032369438	-0.102232048425101	-0.1037145599242663	-0.12984181956372334	-0.10431278948361537	-0.11077538593666372	-0.09750699042240517	-0.10897580839497217	-0.06773758292792664	-0.10309134357847263	-0.10024790671094282	-0.11173144002388061	-0.10518508502739306	-0.06987068074338225	-0.04534543950895725	-0.07078275366053946	-0.04716050015272323	-0.0683502413514244	-0.06354194956691493	-0.008383439336671236	0.02418736584536844	0.0051702672656877965	-0.015448023605596481	0.004137374678214767	0.021143692244431737	0.003076660726643935
VIIB	-0.1077666779906298	-0.10850351783048738	-0.13148651289475752	-0.10255291559583611	-0.08557741277429193	-0.13257246099360506	-0.07676324976695849	-0.07651491221820304	-0.07159325759454963	-0.00638795355872444	-0.03205565962648557	-0.09231758019958172	-0.1224178988079682	-0.06893222271393153	-0.0512938973032676	-0.03093472701539846	-0.01171426021116028	-0.004172426257828422	-0.11853610274194706	-0.09229294447248627	-0.10853620884618535	-0.12010013511857537	-0.09042424513483624	-0.09297969828487962	-0.10822762329658389	-0.10791239649146002	-0.1373177497162663	-0.11088534219053105	-0.11683136894979851	-0.1025811794201583	-0.11565953051275317	-0.06911295359864535	-0.10987814508934635	-0.10642017506617321	-0.11899492338045052	-0.11127401909363017	-0.07238579349160731	-0.04294170838018132	-0.07310577777608684	-0.04743534128746088	-0.07082415872365397	-0.06449456937042397	-0.0055508445348216836	0.0260099087655307	0.01009136982860013	-0.012825421570551387	0.00794086618503413	0.02517407036570056	0.006278234963497719
VIIIA	-0.1019091904520024	-0.10086541573774552	-0.12318524588927149	-0.09609987731476224	-0.0771224894204953	-0.1255919549846441	-0.07212823398229759	-0.07142455195278538	-0.06667198530752193	-0.007193771266512614	-0.03095813092558982	-0.08724354985677944	-0.11777891917769331	-0.061586393480646116	-0.04389910549213888	-0.02323833879029913	-0.0040773542871127225	5.966809221603631e-4	-0.1109505402433313	-0.08628135553793097	-0.10405102405641665	-0.10996572918663915	-0.08034742214738139	-0.0828969020950334	-0.09759002176312591	-0.10184838336817013	-0.12772236667787684	-0.10266080753411633	-0.10797498331195586	-0.09540003875904295	-0.10641686919870696	-0.06309425552367975	-0.09968335532544957	-0.09853638519697834	-0.11034369978335123	-0.10064128621554566	-0.0659722442670925	-0.04736108375081038	-0.07004643731084903	-0.04863608468096515	-0.07012407143409898	-0.06466250936572845	-0.01220367487951619	0.021640460350918572	0.004635065007811555	-0.01791749467178182	0.001944314021452322	0.017588158205904248	1.6838175851417164e-4
VIIIB	-0.10288573358971381	-0.10698524801746444	-0.12748038002557216	-0.10147757480173097	-0.08387074997752492	-0.1304462569285921	-0.07457702892147454	-0.07434412357627966	-0.06962982316295793	-0.00657732864823518	-0.039015067771449696	-0.09171086098397345	-0.1263351846809536	-0.06535311610203187	-0.05174720229465415	-0.03260010875400845	-0.010673403868753992	-0.004058662099483718	-0.12324971201607977	-0.0914588637103893	-0.11475831202016883	-0.1215649566325211	-0.09364731507763364	-0.09814639730071374	-0.11056621703036393	-0.11110389113496624	-0.1375002994129142	-0.11694222380180941	-0.12353747387171929	-0.10497172048991284	-0.11714370220158987	-0.07342347125647776	-0.1103185405021862	-0.11424199717492124	-0.1233644344308389	-0.11129060797352723	-0.07689032865258176	-0.03351278155920317	-0.06615235975605971	-0.04483817791411588	-0.06655131804963114	-0.06018657605114265	0.0018512888640364606	0.025410011378141244	0.007074017334707143	-0.0148038862316854	0.015795848709119202	0.028572722279458243	0.010194902199347525
IX	-0.11221080808538272	-0.10891070449421983	-0.1354370436805425	-0.0990069100872465	-0.08852968819357301	-0.13976308293701456	-0.07809587906223395	-0.07793421707006466	-0.07632133097739026	0.003348189709161534	-0.030417388372851642	-0.08584522753273592	-0.12381130109013394	-0.0726510766563201	-0.05567078042573566	-0.03633647443048374	-0.017669815493394542	-0.0020694132289119996	-0.1276999893633817	-0.09741967535718764	-0.11478983393113196	-0.1275542552250593	-0.09793461355232641	-0.09943646109370446	-0.11539620712902514	-0.11064515548152629	-0.14628613168612684	-0.1156017615541275	-0.12355307928922114	-0.10094050656905641	-0.12051163737013064	-0.07636871821845301	-0.11905310942082711	-0.11276692648298699	-0.12570083881085256	-0.11725723240561373	-0.07651091120999087	-0.039837973979050006	-0.06922097941072623	-0.042541250602725615	-0.057355841645997704	-0.05951640087836075	-0.0022085190407227996	0.03178843349054264	0.01008928720507233	-0.010702769505295426	0.013614609489504336	0.0283678179693261	0.0071681218764190514
X	-0.128623028108067	-0.1333903685628053	-0.15852722679523276	-0.1120369659458081	-0.10432550171862591	-0.1526802047359175	-0.08612016779754138	-0.08367296065270217	-0.08091299226690149	0.0033907111853123386	-0.05308578139472643	-0.10370899470612686	-0.12972410718325092	-0.08375311237319942	-0.08089807029689124	-0.059308365528302785	-0.03590767925760996	-0.02360930663432921	-0.14346058909341922	-0.11147433993212137	-0.11928686378442667	-0.14639940337183927	-0.11736522960533353	-0.11835297006214175	-0.13566252286858577	-0.12333414968233386	-0.1717650903705801	-0.1418186532563128	-0.14636439996292805	-0.12072315716534424	-0.1461145495351983	-0.09222072720502245	-0.13952548323371042	-0.1375368552281768	-0.1510701826847788	-0.14053602900907827	-0.09759926093458454	-0.03323839363668355	-0.07621209796474886	-0.055479090579395214	-0.07572216347792037	-0.0676918163466393	0.00217178141628801	0.035516073615997415	0.044541235497049275	0.004290086038127791	0.018915921932957568	0.043502198198913634	0.017879699409944903
cerebellar nuclei	-0.21115032059444092	-0.2579511022219344	-0.2913499849719375	-0.16131594386648512	-0.18815816546040073	-0.2763079724272604	-0.11268836378119675	-0.1265523271586068	-0.14282522198733325	0.044546349233840994	-0.09591538254772895	-0.1492996171527573	-0.16194132497187066	-0.21848707857370403	-0.21100212250067144	-0.19037923596147385	-0.1529094790672046	-0.13637871391951015	-0.3074309224821907	-0.15979872214133056	-0.19474901124670935	-0.3076009708274666	-0.2876761223046182	-0.2854175879719884	-0.29466640103727065	-0.18781238802083303	-0.3526176841985732	-0.28958384238900836	-0.31038278608577	-0.19902766011927206	-0.2784238834569842	-0.2660402055830009	-0.3147736185359633	-0.28396875238866487	-0.3050617760431938	-0.3290097650510615	-0.2649606567825612	0.09627494847526716	-0.09222222217445533	-0.040464782809880584	-0.07125250052579465	-0.03770996747994133	0.1345365809994698	0.16841110114058913	0.23078188338841207	0.19878539756574373	0.19828206298678835	0.27641161156020727	0.20283231908980842
[truncated: 18 more columns]
