# Supplementary material for: Whole-brain comparison of rodent and human brains using spatial transcriptomics
Source: eLife. 2022 Nov 7;11:e79418. doi: 10.7554/eLife.79418 (PMC9708081; doi:10.7554/eLife.79418)
Supplement: Figure 2—source data 1. [file elife-79418-fig2-data1.csv]

LatentSpaceID	MouseRegion	HumanRegion	Correlation
1	Cortical subplate-other	claustrum	0.40601001295068895
1	Cortical subplate-other	dentate gyrus	0.6749321449736378
1	Cortical subplate-other	CA1 field	0.642299436358556
1	Cortical subplate-other	CA2 field	0.7955765750135548
1	Cortical subplate-other	CA3 field	0.8149984928655556
1	Cortical subplate-other	CA4 field	0.8512930996011634
1	Cortical subplate-other	subiculum	0.6658036700388372
1	Cortical subplate-other	cingulate gyrus	0.1956842252953935
1	Cortical subplate-other	parahippocampal gyrus	0.5284029519674615
1	Cortical subplate-other	piriform cortex	0.8973487048339639
1	Cortical subplate-other	anterior orbital gyrus	0.20597794216483103
1	Cortical subplate-other	frontal operculum	0.2339171246694892
1	Cortical subplate-other	frontal pole	0.09223331021674619
1	Cortical subplate-other	gyrus rectus	0.33066025119111864
1	Cortical subplate-other	inferior frontal gyrus	0.08478452943864363
1	Cortical subplate-other	inferior rostral gyrus	0.35620313826750644
1	Cortical subplate-other	lateral orbital gyrus	0.11892520175639446
1	Cortical subplate-other	medial orbital gyrus	0.2967742427290485
1	Cortical subplate-other	middle frontal gyrus	0.07255676838850016
1	Cortical subplate-other	paracentral lobule, anterior part	-0.16693205882351383
1	Cortical subplate-other	paraterminal gyrus	0.6768594632058915
1	Cortical subplate-other	parolfactory gyri	0.6006545071996686
1	Cortical subplate-other	posterior orbital gyrus	0.22624656082981484
1	Cortical subplate-other	precentral gyrus	-0.23350851800448882
1	Cortical subplate-other	superior frontal gyrus	0.117020843417355
1	Cortical subplate-other	superior rostral gyrus	0.28057771051043456
1	Cortical subplate-other	insula	0.3350817249454157
1	Cortical subplate-other	cuneus	-0.268045579371501
1	Cortical subplate-other	inferior occipital gyrus	-0.1700122906845657
1	Cortical subplate-other	lingual gyrus	-0.2718435579104989
1	Cortical subplate-other	occipital pole	-0.19868131401877345
1	Cortical subplate-other	occipito-temporal gyrus	-0.05884826906378582
1	Cortical subplate-other	superior occipital gyrus	-0.17083254442178175
1	Cortical subplate-other	inferior parietal lobule	-0.008441228761876987
1	Cortical subplate-other	paracentral lobule, posterior part	-0.040534140011544706
1	Cortical subplate-other	postcentral gyrus	-0.24963184375283703
1	Cortical subplate-other	precuneus	-0.07968388559951642
1	Cortical subplate-other	superior parietal lobule	-0.16682594152821228
1	Cortical subplate-other	fusiform gyrus	0.34748916338053154
1	Cortical subplate-other	Heschl's gyrus	-0.09704674543902718
1	Cortical subplate-other	inferior temporal gyrus	0.23699167453885428
1	Cortical subplate-other	middle temporal gyrus	0.12537900974470043
1	Cortical subplate-other	planum polare	0.27839602547897696
1	Cortical subplate-other	planum temporale	-0.06463499986055204
1	Cortical subplate-other	superior temporal gyrus	0.10671471819415053
1	Cortical subplate-other	temporal pole	0.5054884798844294
1	Cortical subplate-other	transverse gyri	-0.15083211777991104
1	Cortical subplate-other	amygdala	0.9172200428299212
1	Cortical subplate-other	globus pallidus	0.14693521102055165
1	Cortical subplate-other	caudate nucleus	0.3543075174812042
1	Cortical subplate-other	nucleus accumbens	0.5416014101923788
1	Cortical subplate-other	putamen	0.3163565727214812
1	Cortical subplate-other	septal nuclei	0.6346621937996598
1	Cortical subplate-other	substantia innominata	0.620544687888843
1	Cortical subplate-other	epithalamus	0.4614410760777945
1	Cortical subplate-other	hypothalamus	0.607804237141299
1	Cortical subplate-other	subthalamus	0.1287261178911514
1	Cortical subplate-other	thalamus	0.2577948948618044
1	Cortical subplate-other	inferior colliculus	0.07632131713715741
1	Cortical subplate-other	superior colliculus	0.19263951391925996
1	Cortical subplate-other	midbrain tegmentum	0.3331027699674328
1	Cortical subplate-other	pretectal region	0.24877645019393513
1	Cortical subplate-other	pons	0.17798781194673646
1	Cortical subplate-other	myelencephalon	0.1726907604652092
1	Cortical subplate-other	vermal I-II	0.22529653689539123
1	Cortical subplate-other	vermal III	0.2137793226254593
1	Cortical subplate-other	vermal IV	0.23089589625708531
1	Cortical subplate-other	vermal V	0.1949061566896304
1	Cortical subplate-other	vermal VI	0.24307112246784193
1	Cortical subplate-other	vermal VIIAf	0.20152601372530124
1	Cortical subplate-other	vermal VIIAt	0.21454728825533756
1	Cortical subplate-other	vermal VIIB	0.21610728523539252
1	Cortical subplate-other	vermal VIIIA	0.22507103498371706
1	Cortical subplate-other	vermal VIIIB	0.23663979138380378
1	Cortical subplate-other	vermal IX	0.23898986130147998
1	Cortical subplate-other	vermal X	0.3026269618096629
1	Cortical subplate-other	III	0.20537683055998493
1	Cortical subplate-other	IV	0.21108871879471158
1	Cortical subplate-other	V	0.21547528438505528
1	Cortical subplate-other	VI	0.2315983607085641
1	Cortical subplate-other	crus I	0.2211699498629967
1	Cortical subplate-other	crus II	0.20609744328018031
1	Cortical subplate-other	VIIB	0.20755789262020571
1	Cortical subplate-other	VIIIA	0.2154944646090437
1	Cortical subplate-other	VIIIB	0.23310138155342033
1	Cortical subplate-other	IX	0.17990733537543585
1	Cortical subplate-other	X	0.1991104984009917
1	Cortical subplate-other	cerebellar nuclei	0.03687917075432698
1	Claustrum	claustrum	0.9091706303555249
1	Claustrum	dentate gyrus	0.6672863138955332
1	Claustrum	CA1 field	0.5215826003024453
1	Claustrum	CA2 field	0.46120731648287844
1	Claustrum	CA3 field	0.4334727392678857
1	Claustrum	CA4 field	0.3662415447706076
1	Claustrum	subiculum	0.3928434423879748
1	Claustrum	cingulate gyrus	0.7130273791970946
1	Claustrum	parahippocampal gyrus	0.7642378995059037
1	Claustrum	piriform cortex	0.5859178643090169
1	Claustrum	anterior orbital gyrus	0.7365592651500839
1	Claustrum	frontal operculum	0.789278226786724
1	Claustrum	frontal pole	0.6720622161291676
1	Claustrum	gyrus rectus	0.7877837664523852
1	Claustrum	inferior frontal gyrus	0.7040028256417258
1	Claustrum	inferior rostral gyrus	0.7683727677272452
1	Claustrum	lateral orbital gyrus	0.7048412016516487
1	Claustrum	medial orbital gyrus	0.7641984394373963
1	Claustrum	middle frontal gyrus	0.6510165354271847
1	Claustrum	paracentral lobule, anterior part	0.5147985888153781
1	Claustrum	paraterminal gyrus	0.60445564645538985
1	Claustrum	parolfactory gyri	0.774600800486403
1	Claustrum	posterior orbital gyrus	0.7855587187119503
1	Claustrum	precentral gyrus	0.4485213314896688
1	Claustrum	superior frontal gyrus	0.6820461361771455
1	Claustrum	superior rostral gyrus	0.7541205575045875
1	Claustrum	insula	0.8164660804922739
1	Claustrum	cuneus	0.38814949686874234
1	Claustrum	inferior occipital gyrus	0.523143867776462
1	Claustrum	lingual gyrus	0.4007060295751782
1	Claustrum	occipital pole	0.47990566479232116
1	Claustrum	occipito-temporal gyrus	0.6203253007641691
1	Claustrum	superior occipital gyrus	0.4942709738882952
1	Claustrum	inferior parietal lobule	0.6256908967807381
1	Claustrum	paracentral lobule, posterior part	0.5505753007133537
1	Claustrum	postcentral gyrus	0.43540393793508037
1	Claustrum	precuneus	0.5648709646128537
1	Claustrum	superior parietal lobule	0.5017169951651359
1	Claustrum	fusiform gyrus	0.8106279698043946
1	Claustrum	Heschl's gyrus	0.6031611276681231
1	Claustrum	inferior temporal gyrus	0.7698230717242939
1	Claustrum	middle temporal gyrus	0.7306525781730766
1	Claustrum	planum polare	0.8079497793594708
1	Claustrum	planum temporale	0.5728850613665076
1	Claustrum	superior temporal gyrus	0.7095679346585829
1	Claustrum	temporal pole	0.813429362440709
1	Claustrum	transverse gyri	0.5642692412930748
1	Claustrum	amygdala	0.4907898329402533
1	Claustrum	globus pallidus	0.19566625010017422
1	Claustrum	caudate nucleus	0.5980562603647532
1	Claustrum	nucleus accumbens	0.5727528591673222
1	Claustrum	putamen	0.5540847541878493
1	Claustrum	septal nuclei	0.19923981726067513
1	Claustrum	substantia innominata	0.24190779158746442
1	Claustrum	epithalamus	0.13002877268184018
1	Claustrum	hypothalamus	0.1314809532148532
1	Claustrum	subthalamus	0.13942249831983825
1	Claustrum	thalamus	0.12375844499758551
1	Claustrum	inferior colliculus	0.16098913631287254
1	Claustrum	superior colliculus	0.13352260385699266
1	Claustrum	midbrain tegmentum	0.14254098065718443
1	Claustrum	pretectal region	0.1468475425077726
1	Claustrum	pons	0.138009576948735
1	Claustrum	myelencephalon	0.1356828700983815
1	Claustrum	vermal I-II	0.09342812088845442
1	Claustrum	vermal III	0.06134897425285877
1	Claustrum	vermal IV	0.05779464596344837
1	Claustrum	vermal V	0.05682749478533541
1	Claustrum	vermal VI	0.0593879735944862
1	Claustrum	vermal VIIAf	0.047213087702156105
1	Claustrum	vermal VIIAt	0.05151659454772547
1	Claustrum	vermal VIIB	0.06286450077888392
1	Claustrum	vermal VIIIA	0.05490143343356035
1	Claustrum	vermal VIIIB	0.05992120389674222
1	Claustrum	vermal IX	0.05426232120481373
1	Claustrum	vermal X	0.07270463237167396
1	Claustrum	III	0.07052727832400649
1	Claustrum	IV	0.060876381176599166
1	Claustrum	V	0.06136279173452142
1	Claustrum	VI	0.05589617122511507
1	Claustrum	crus I	0.05622866500965388
1	Claustrum	crus II	0.05309907822239572
1	Claustrum	VIIB	0.05458220969316254
1	Claustrum	VIIIA	0.05029006213865649
1	Claustrum	VIIIB	0.05385253796792808
1	Claustrum	IX	0.057882322299444115
1	Claustrum	X	0.05899267916950148
1	Claustrum	cerebellar nuclei	0.1468496993901535
1	Endopiriform nucleus	claustrum	0.7991226820739344
1	Endopiriform nucleus	dentate gyrus	0.7595688649510847
1	Endopiriform nucleus	CA1 field	0.6338980957073661
1	Endopiriform nucleus	CA2 field	0.6909543602639477
1	Endopiriform nucleus	CA3 field	0.6851169951780414
1	Endopiriform nucleus	CA4 field	0.64726354047648
1	Endopiriform nucleus	subiculum	0.5618459026348918
1	Endopiriform nucleus	cingulate gyrus	0.5517379937174299
1	Endopiriform nucleus	parahippocampal gyrus	0.7554442146638523
1	Endopiriform nucleus	piriform cortex	0.8122892955300206
1	Endopiriform nucleus	anterior orbital gyrus	0.5762651804865987
1	Endopiriform nucleus	frontal operculum	0.6331007028983879
1	Endopiriform nucleus	frontal pole	0.47034271360743507
1	Endopiriform nucleus	gyrus rectus	0.6821384336303996
1	Endopiriform nucleus	inferior frontal gyrus	0.4952634011409302
1	Endopiriform nucleus	inferior rostral gyrus	0.6819460430860793
1	Endopiriform nucleus	lateral orbital gyrus	0.508485418414275
1	Endopiriform nucleus	medial orbital gyrus	0.6493164144214375
1	Endopiriform nucleus	middle frontal gyrus	0.4530146214011493
1	Endopiriform nucleus	paracentral lobule, anterior part	0.2330682410565521
1	Endopiriform nucleus	paraterminal gyrus	0.6467441277486042
1	Endopiriform nucleus	parolfactory gyri	0.8015658816886968
1	Endopiriform nucleus	posterior orbital gyrus	0.6255345703556784
1	Endopiriform nucleus	precentral gyrus	0.15466401226451967
1	Endopiriform nucleus	superior frontal gyrus	0.4963653205026469
1	Endopiriform nucleus	superior rostral gyrus	0.6268909651546544
1	Endopiriform nucleus	insula	0.6993841845641877
1	Endopiriform nucleus	cuneus	0.08639714457659414
1	Endopiriform nucleus	inferior occipital gyrus	0.23552067884356773
1	Endopiriform nucleus	lingual gyrus	0.09131281775513718
1	Endopiriform nucleus	occipital pole	0.19408633400139394
1	Endopiriform nucleus	occipito-temporal gyrus	0.3581992967952028
1	Endopiriform nucleus	superior occipital gyrus	0.21564175704551225
1	Endopiriform nucleus	inferior parietal lobule	0.39072301887419136
1	Endopiriform nucleus	paracentral lobule, posterior part	0.3172310745630894
1	Endopiriform nucleus	postcentral gyrus	0.13444058317372207
1	Endopiriform nucleus	precuneus	0.3119748260407089
1	Endopiriform nucleus	superior parietal lobule	0.2223901213002205
1	Endopiriform nucleus	fusiform gyrus	0.7050840181196177
1	Endopiriform nucleus	Heschl's gyrus	0.3234030706814961
1	Endopiriform nucleus	inferior temporal gyrus	0.6186321492214539
1	Endopiriform nucleus	middle temporal gyrus	0.5312762248099805
1	Endopiriform nucleus	planum polare	0.663030932839371
1	Endopiriform nucleus	planum temporale	0.31570010141408505
1	Endopiriform nucleus	superior temporal gyrus	0.5082324128964666
1	Endopiriform nucleus	temporal pole	0.7937486756888762
1	Endopiriform nucleus	transverse gyri	0.25977969760339914
1	Endopiriform nucleus	amygdala	0.6978746239466306
1	Endopiriform nucleus	globus pallidus	0.17143897825524645
1	Endopiriform nucleus	caudate nucleus	0.4630164261450666
1	Endopiriform nucleus	nucleus accumbens	0.5428532893315422
1	Endopiriform nucleus	putamen	0.4187648167492835
1	Endopiriform nucleus	septal nuclei	0.35154712495046736
1	Endopiriform nucleus	substantia innominata	0.3977219459002775
1	Endopiriform nucleus	epithalamus	0.2505734214360529
1	Endopiriform nucleus	hypothalamus	0.3143650076893633
1	Endopiriform nucleus	subthalamus	0.11598201262769434
1	Endopiriform nucleus	thalamus	0.1713550127837436
1	Endopiriform nucleus	inferior colliculus	0.07726379050995555
1	Endopiriform nucleus	superior colliculus	0.11669981513358113
1	Endopiriform nucleus	midbrain tegmentum	0.20122130240988265
1	Endopiriform nucleus	pretectal region	0.1598044811991753
1	Endopiriform nucleus	pons	0.1302268813325598
1	Endopiriform nucleus	myelencephalon	0.12912536890290974
1	Endopiriform nucleus	vermal I-II	0.15260092341005707
1	Endopiriform nucleus	vermal III	0.1365759595608416
1	Endopiriform nucleus	vermal IV	0.14818450825081378
1	Endopiriform nucleus	vermal V	0.13461162108004637
1	Endopiriform nucleus	vermal VI	0.15775294161688236
1	Endopiriform nucleus	vermal VIIAf	0.12980712684332268
1	Endopiriform nucleus	vermal VIIAt	0.14759710958884506
1	Endopiriform nucleus	vermal VIIB	0.14410416867981396
1	Endopiriform nucleus	vermal VIIIA	0.14646605350067993
1	Endopiriform nucleus	vermal VIIIB	0.14523473731912742
1	Endopiriform nucleus	vermal IX	0.15036401160872134
1	Endopiriform nucleus	vermal X	0.16460830965297915
1	Endopiriform nucleus	III	0.1455178614915249
1	Endopiriform nucleus	IV	0.14768078726290704
1	Endopiriform nucleus	V	0.15030860000569243
1	Endopiriform nucleus	VI	0.15443807317378772
1	Endopiriform nucleus	crus I	0.1502633542261306
1	Endopiriform nucleus	crus II	0.14513307255974478
1	Endopiriform nucleus	VIIB	0.14370189552036605
1	Endopiriform nucleus	VIIIA	0.1486704879695628
1	Endopiriform nucleus	VIIIB	0.15870916744395633
1	Endopiriform nucleus	IX	0.1388412202392842
1	Endopiriform nucleus	X	0.13431721011889375
1	Endopiriform nucleus	cerebellar nuclei	0.08376020245882265
1	Olfactory areas-other	claustrum	0.5844181044641483
1	Olfactory areas-other	dentate gyrus	0.7489798179980892
1	Olfactory areas-other	CA1 field	0.630916467627121
1	Olfactory areas-other	CA2 field	0.671297171780028
1	Olfactory areas-other	CA3 field	0.6783357543533582
1	Olfactory areas-other	CA4 field	0.6350719275782731
1	Olfactory areas-other	subiculum	0.6319732981663203
1	Olfactory areas-other	cingulate gyrus	0.451491225814642
1	Olfactory areas-other	parahippocampal gyrus	0.6320563120680996
1	Olfactory areas-other	piriform cortex	0.7954935629297105
1	Olfactory areas-other	anterior orbital gyrus	0.47252392337685173
1	Olfactory areas-other	frontal operculum	0.4740316761092829
1	Olfactory areas-other	frontal pole	0.3756628495680299
1	Olfactory areas-other	gyrus rectus	0.5581309260679223
1	Olfactory areas-other	inferior frontal gyrus	0.34853002659833876
1	Olfactory areas-other	inferior rostral gyrus	0.5680487767577456
1	Olfactory areas-other	lateral orbital gyrus	0.3878657835869268
1	Olfactory areas-other	medial orbital gyrus	0.5401254057865175
1	Olfactory areas-other	middle frontal gyrus	0.34998273007339026
1	Olfactory areas-other	paracentral lobule, anterior part	0.11281604441407972
1	Olfactory areas-other	paraterminal gyrus	0.6090268721004424
1	Olfactory areas-other	parolfactory gyri	0.7042749117671064
1	Olfactory areas-other	posterior orbital gyrus	0.48878634172022695
1	Olfactory areas-other	precentral gyrus	0.03811656700373134
1	Olfactory areas-other	superior frontal gyrus	0.3901954539679687
1	Olfactory areas-other	superior rostral gyrus	0.5213506612857965
1	Olfactory areas-other	insula	0.5419736045558903
1	Olfactory areas-other	cuneus	-0.054517187011388905
1	Olfactory areas-other	inferior occipital gyrus	0.0945544499232494
1	Olfactory areas-other	lingual gyrus	-0.05610472831963646
1	Olfactory areas-other	occipital pole	0.02845932302052625
1	Olfactory areas-other	occipito-temporal gyrus	0.20066403096919924
1	Olfactory areas-other	superior occipital gyrus	0.10736077474453765
1	Olfactory areas-other	inferior parietal lobule	0.26739276604468254
1	Olfactory areas-other	paracentral lobule, posterior part	0.20628809269813445
1	Olfactory areas-other	postcentral gyrus	0.009818797040673816
1	Olfactory areas-other	precuneus	0.20978268149349721
1	Olfactory areas-other	superior parietal lobule	0.11242722436003606
1	Olfactory areas-other	fusiform gyrus	0.5380784239822722
1	Olfactory areas-other	Heschl's gyrus	0.1576408403896529
1	Olfactory areas-other	inferior temporal gyrus	0.4693204715636952
1	Olfactory areas-other	middle temporal gyrus	0.38016613820343903
1	Olfactory areas-other	planum polare	0.500585287614176
1	Olfactory areas-other	planum temporale	0.20102829216755091
1	Olfactory areas-other	superior temporal gyrus	0.3705965625658994
1	Olfactory areas-other	temporal pole	0.650449253204102
1	Olfactory areas-other	transverse gyri	0.08720733596142355
1	Olfactory areas-other	amygdala	0.6325998343271382
1	Olfactory areas-other	globus pallidus	0.21738143284080122
1	Olfactory areas-other	caudate nucleus	0.2502316828383808
1	Olfactory areas-other	nucleus accumbens	0.37172148496501867
1	Olfactory areas-other	putamen	0.24193539279303283
1	Olfactory areas-other	septal nuclei	0.44559439424647906
1	Olfactory areas-other	substantia innominata	0.38778607147830113
1	Olfactory areas-other	epithalamus	0.3591257278729252
1	Olfactory areas-other	hypothalamus	0.33575509364498407
1	Olfactory areas-other	subthalamus	0.1272192785783791
1	Olfactory areas-other	thalamus	0.3092445061000533
1	Olfactory areas-other	inferior colliculus	0.12207145357182178
1	Olfactory areas-other	superior colliculus	0.19424388047080776
1	Olfactory areas-other	midbrain tegmentum	0.20976694015101746
1	Olfactory areas-other	pretectal region	0.23201540392609726
1	Olfactory areas-other	pons	0.09722537703181207
1	Olfactory areas-other	myelencephalon	0.12246114954676908
1	Olfactory areas-other	vermal I-II	0.3749992044716241
1	Olfactory areas-other	vermal III	0.39676938825672226
1	Olfactory areas-other	vermal IV	0.4149127194483748
1	Olfactory areas-other	vermal V	0.3925118250623583
1	Olfactory areas-other	vermal VI	0.4176048746540146
1	Olfactory areas-other	vermal VIIAf	0.3930134226375522
1	Olfactory areas-other	vermal VIIAt	0.4102048061718757
1	Olfactory areas-other	vermal VIIB	0.4049437416890237
1	Olfactory areas-other	vermal VIIIA	0.41424579319779475
1	Olfactory areas-other	vermal VIIIB	0.42076817249182047
1	Olfactory areas-other	vermal IX	0.42935447231768925
1	Olfactory areas-other	vermal X	0.4078104458886873
1	Olfactory areas-other	III	0.39599502008289555
1	Olfactory areas-other	IV	0.39617312187779574
1	Olfactory areas-other	V	0.40270672349443287
1	Olfactory areas-other	VI	0.4162257961728112
1	Olfactory areas-other	crus I	0.40801970283624184
1	Olfactory areas-other	crus II	0.4074279920034229
1	Olfactory areas-other	VIIB	0.4091755132122743
1	Olfactory areas-other	VIIIA	0.4145042048007465
1	Olfactory areas-other	VIIIB	0.42668541875468297
1	Olfactory areas-other	IX	0.38509163021723175
1	Olfactory areas-other	X	0.3907614970714548
1	Olfactory areas-other	cerebellar nuclei	0.09147027539089483
1	Postpiriform transition area	claustrum	0.5047226558739137
1	Postpiriform transition area	dentate gyrus	0.6576215421102087
1	Postpiriform transition area	CA1 field	0.6355003857307792
1	Postpiriform transition area	CA2 field	0.6945512849717717
1	Postpiriform transition area	CA3 field	0.6964378608765021
1	Postpiriform transition area	CA4 field	0.7300356837204109
1	Postpiriform transition area	subiculum	0.6084759079933778
1	Postpiriform transition area	cingulate gyrus	0.3461007123875242
1	Postpiriform transition area	parahippocampal gyrus	0.6395640432136257
1	Postpiriform transition area	piriform cortex	0.8289994905900927
1	Postpiriform transition area	anterior orbital gyrus	0.35221305275929693
1	Postpiriform transition area	frontal operculum	0.36459661281150846
1	Postpiriform transition area	frontal pole	0.3184802151781635
1	Postpiriform transition area	gyrus rectus	0.4665106908863819
1	Postpiriform transition area	inferior frontal gyrus	0.2323409943928251
1	Postpiriform transition area	inferior rostral gyrus	0.4906420611907456
1	Postpiriform transition area	lateral orbital gyrus	0.3037925929178218
1	Postpiriform transition area	medial orbital gyrus	0.43071533335270307
1	Postpiriform transition area	middle frontal gyrus	0.22364230361425252
1	Postpiriform transition area	paracentral lobule, anterior part	-0.04171274244542248
1	Postpiriform transition area	paraterminal gyrus	0.6190940153315708
1	Postpiriform transition area	parolfactory gyri	0.5949256262814243
1	Postpiriform transition area	posterior orbital gyrus	0.3759501727914917
1	Postpiriform transition area	precentral gyrus	-0.09229615348878309
1	Postpiriform transition area	superior frontal gyrus	0.2657783996755193
1	Postpiriform transition area	superior rostral gyrus	0.40532783266780553
1	Postpiriform transition area	insula	0.46143211993576805
1	Postpiriform transition area	cuneus	-0.09071000593804995
1	Postpiriform transition area	inferior occipital gyrus	0.011055829405903163
1	Postpiriform transition area	lingual gyrus	-0.06861886439396021
1	Postpiriform transition area	occipital pole	-0.015512675685083337
1	Postpiriform transition area	occipito-temporal gyrus	0.12383326344422212
1	Postpiriform transition area	superior occipital gyrus	6.25548661577227e-4
1	Postpiriform transition area	inferior parietal lobule	0.1601134987038772
1	Postpiriform transition area	paracentral lobule, posterior part	0.1207942383887826
1	Postpiriform transition area	postcentral gyrus	-0.09910935797508724
1	Postpiriform transition area	precuneus	0.10935411378400191
1	Postpiriform transition area	superior parietal lobule	0.020331100326374536
1	Postpiriform transition area	fusiform gyrus	0.46422577397425435
1	Postpiriform transition area	Heschl's gyrus	0.09144747836746137
1	Postpiriform transition area	inferior temporal gyrus	0.39145371991931804
1	Postpiriform transition area	middle temporal gyrus	0.29360266750837016
1	Postpiriform transition area	planum polare	0.38925475391466274
1	Postpiriform transition area	planum temporale	0.14908144720564795
1	Postpiriform transition area	superior temporal gyrus	0.25416912536852193
1	Postpiriform transition area	temporal pole	0.588382050956213
1	Postpiriform transition area	transverse gyri	0.04048278491262316
1	Postpiriform transition area	amygdala	0.7240817639862632
1	Postpiriform transition area	globus pallidus	0.16550570304227646
1	Postpiriform transition area	caudate nucleus	0.1441580100097565
1	Postpiriform transition area	nucleus accumbens	0.2805621070775655
1	Postpiriform transition area	putamen	0.11392699601395335
1	Postpiriform transition area	septal nuclei	0.34976286531626455
1	Postpiriform transition area	substantia innominata	0.33260649061210995
1	Postpiriform transition area	epithalamus	0.3309494754629421
1	Postpiriform transition area	hypothalamus	0.35482718378078526
1	Postpiriform transition area	subthalamus	0.12378302693689525
1	Postpiriform transition area	thalamus	0.19521395882886583
1	Postpiriform transition area	inferior colliculus	0.03369650494709479
1	Postpiriform transition area	superior colliculus	0.10011550023487716
1	Postpiriform transition area	midbrain tegmentum	0.23888734687874688
1	Postpiriform transition area	pretectal region	0.17409698808528282
1	Postpiriform transition area	pons	0.1577028880159055
1	Postpiriform transition area	myelencephalon	0.16786452669704835
1	Postpiriform transition area	vermal I-II	0.31488710850572377
1	Postpiriform transition area	vermal III	0.3740737065840088
1	Postpiriform transition area	vermal IV	0.39999691596778864
1	Postpiriform transition area	vermal V	0.3847841864971532
1	Postpiriform transition area	vermal VI	0.4117138106920344
1	Postpiriform transition area	vermal VIIAf	0.4047293018731224
1	Postpiriform transition area	vermal VIIAt	0.4181608111754589
1	Postpiriform transition area	vermal VIIB	0.37334498002183336
1	Postpiriform transition area	vermal VIIIA	0.40826946904457856
1	Postpiriform transition area	vermal VIIIB	0.37074008759369337
1	Postpiriform transition area	vermal IX	0.3712525430529734
1	Postpiriform transition area	vermal X	0.32792451094244107
1	Postpiriform transition area	III	0.3616051048737294
1	Postpiriform transition area	IV	0.3998845220796302
1	Postpiriform transition area	V	0.4045675035766125
1	Postpiriform transition area	VI	0.4166207968429648
1	Postpiriform transition area	crus I	0.416063980779887
1	Postpiriform transition area	crus II	0.4038248331172684
1	Postpiriform transition area	VIIB	0.39308821907132685
1	Postpiriform transition area	VIIIA	0.41739423537774006
1	Postpiriform transition area	VIIIB	0.41073304087256973
1	Postpiriform transition area	IX	0.39888158540487567
1	Postpiriform transition area	X	0.3560448081708965
1	Postpiriform transition area	cerebellar nuclei	0.0896186633516183
1	Piriform area	claustrum	0.7794324781139081
1	Piriform area	dentate gyrus	0.7145601387509228
1	Piriform area	CA1 field	0.5983071559295235
1	Piriform area	CA2 field	0.6490647280882289
1	Piriform area	CA3 field	0.6415607627087058
1	Piriform area	CA4 field	0.6032967654593308
1	Piriform area	subiculum	0.5216884890339418
1	Piriform area	cingulate gyrus	0.5473999049908098
1	Piriform area	parahippocampal gyrus	0.7494302798779584
1	Piriform area	piriform cortex	0.7749624186961829
1	Piriform area	anterior orbital gyrus	0.57183342764119
1	Piriform area	frontal operculum	0.622809078804028
1	Piriform area	frontal pole	0.49719097140026264
1	Piriform area	gyrus rectus	0.6832697106063588
1	Piriform area	inferior frontal gyrus	0.4842811198811657
1	Piriform area	inferior rostral gyrus	0.6864594676290232
1	Piriform area	lateral orbital gyrus	0.5132139688939434
1	Piriform area	medial orbital gyrus	0.6498017154419391
1	Piriform area	middle frontal gyrus	0.4505024148521779
1	Piriform area	paracentral lobule, anterior part	0.20825511272039807
1	Piriform area	paraterminal gyrus	0.5428033599167904
1	Piriform area	parolfactory gyri	0.7572287405239576
1	Piriform area	posterior orbital gyrus	0.6250042352457567
1	Piriform area	precentral gyrus	0.13959583283700022
1	Piriform area	superior frontal gyrus	0.49353791442529044
1	Piriform area	superior rostral gyrus	0.6169708848203127
1	Piriform area	insula	0.6880310423045465
1	Piriform area	cuneus	0.06664682330044727
1	Piriform area	inferior occipital gyrus	0.22719733819674512
1	Piriform area	lingual gyrus	0.08039572081507483
1	Piriform area	occipital pole	0.17990626555263256
1	Piriform area	occipito-temporal gyrus	0.3500055703799865
1	Piriform area	superior occipital gyrus	0.20578572313315896
1	Piriform area	inferior parietal lobule	0.385261605437887
1	Piriform area	paracentral lobule, posterior part	0.3077467698429323
1	Piriform area	postcentral gyrus	0.11382593465437314
1	Piriform area	precuneus	0.3156796025893267
1	Piriform area	superior parietal lobule	0.22212786217057037
1	Piriform area	fusiform gyrus	0.692441680165337
1	Piriform area	Heschl's gyrus	0.31133467684870714
1	Piriform area	inferior temporal gyrus	0.6178459163018164
1	Piriform area	middle temporal gyrus	0.5284714962023873
1	Piriform area	planum polare	0.6387136305642919
1	Piriform area	planum temporale	0.32196475785220985
1	Piriform area	superior temporal gyrus	0.49695628897718325
1	Piriform area	temporal pole	0.785585673722593
1	Piriform area	transverse gyri	0.24042615965071096
1	Piriform area	amygdala	0.5720596000643742
1	Piriform area	globus pallidus	0.15654838080040537
1	Piriform area	caudate nucleus	0.23117899954796198
1	Piriform area	nucleus accumbens	0.315605789025017
1	Piriform area	putamen	0.19665296972945542
1	Piriform area	septal nuclei	0.19353928464207654
1	Piriform area	substantia innominata	0.23900679515582174
1	Piriform area	epithalamus	0.19518929320426573
1	Piriform area	hypothalamus	0.1919023895102147
1	Piriform area	subthalamus	0.08814847634620004
1	Piriform area	thalamus	0.12892076649927078
1	Piriform area	inferior colliculus	0.005941530221753948
1	Piriform area	superior colliculus	0.0374338903040696
1	Piriform area	midbrain tegmentum	0.14259372765654482
1	Piriform area	pretectal region	0.10115306937364611
1	Piriform area	pons	0.09755152437609244
1	Piriform area	myelencephalon	0.10831885691319919
1	Piriform area	vermal I-II	0.2056720172868201
1	Piriform area	vermal III	0.23657830492272267
1	Piriform area	vermal IV	0.2582208486881809
1	Piriform area	vermal V	0.25439364616767995
1	Piriform area	vermal VI	0.2712876164992618
1	Piriform area	vermal VIIAf	0.25831937931522236
1	Piriform area	vermal VIIAt	0.2818110464849414
1	Piriform area	vermal VIIB	0.24609950038207698
1	Piriform area	vermal VIIIA	0.26740003306091653
1	Piriform area	vermal VIIIB	0.23712708926870332
1	Piriform area	vermal IX	0.24683750221545953
1	Piriform area	vermal X	0.19423643089039017
1	Piriform area	III	0.24259736530183856
1	Piriform area	IV	0.2677740794892581
1	Piriform area	V	0.27217929219791653
1	Piriform area	VI	0.27771841088547866
1	Piriform area	crus I	0.27852686277741895
1	Piriform area	crus II	0.2770093694158316
1	Piriform area	VIIB	0.2673305428824695
1	Piriform area	VIIIA	0.2840169494903311
1	Piriform area	VIIIB	0.28244226811520096
1	Piriform area	IX	0.2790566995600984
1	Piriform area	X	0.2362451025407519
1	Piriform area	cerebellar nuclei	0.07991257717265866
1	Taenia tecta	claustrum	0.39045167730202063
1	Taenia tecta	dentate gyrus	0.7427201710953204
1	Taenia tecta	CA1 field	0.6571672566512093
1	Taenia tecta	CA2 field	0.7015984779409459
1	Taenia tecta	CA3 field	0.7156599567734842
1	Taenia tecta	CA4 field	0.6653424199854955
1	Taenia tecta	subiculum	0.7039913240578796
1	Taenia tecta	cingulate gyrus	0.36464992990086426
1	Taenia tecta	parahippocampal gyrus	0.5425705602660659
1	Taenia tecta	piriform cortex	0.7683788516408715
1	Taenia tecta	anterior orbital gyrus	0.3720926134381317
1	Taenia tecta	frontal operculum	0.35404892839878843
1	Taenia tecta	frontal pole	0.25404064820891226
1	Taenia tecta	gyrus rectus	0.44177182610363025
1	Taenia tecta	inferior frontal gyrus	0.2446994255382146
1	Taenia tecta	inferior rostral gyrus	0.45989585613187295
1	Taenia tecta	lateral orbital gyrus	0.27720019256540707
1	Taenia tecta	medial orbital gyrus	0.43343610617620965
1	Taenia tecta	middle frontal gyrus	0.2637955312032422
1	Taenia tecta	paracentral lobule, anterior part	0.05298744435623206
1	Taenia tecta	paraterminal gyrus	0.6809162647937839
1	Taenia tecta	parolfactory gyri	0.6555591777069434
1	Taenia tecta	posterior orbital gyrus	0.35508947693657633
1	Taenia tecta	precentral gyrus	-0.019950783519046607
1	Taenia tecta	superior frontal gyrus	0.2985944450014692
1	Taenia tecta	superior rostral gyrus	0.42779693768420374
1	Taenia tecta	insula	0.42318930705244195
1	Taenia tecta	cuneus	-0.11593544042440541
1	Taenia tecta	inferior occipital gyrus	0.00715149863391576
1	Taenia tecta	lingual gyrus	-0.129530854447213
1	Taenia tecta	occipital pole	-0.04961011234152994
1	Taenia tecta	occipito-temporal gyrus	0.10184304217676361
1	Taenia tecta	superior occipital gyrus	0.03875453991287329
1	Taenia tecta	inferior parietal lobule	0.17812193948492522
1	Taenia tecta	paracentral lobule, posterior part	0.13995110003313915
1	Taenia tecta	postcentral gyrus	-0.048795385411288576
1	Taenia tecta	precuneus	0.127216696662795
1	Taenia tecta	superior parietal lobule	0.03749603937113935
1	Taenia tecta	fusiform gyrus	0.42436238691391426
1	Taenia tecta	Heschl's gyrus	0.0545819903481026
1	Taenia tecta	inferior temporal gyrus	0.35021334101767804
1	Taenia tecta	middle temporal gyrus	0.26295433599908785
1	Taenia tecta	planum polare	0.3892644032052614
1	Taenia tecta	planum temporale	0.11349899454555665
1	Taenia tecta	superior temporal gyrus	0.26944495845649474
1	Taenia tecta	temporal pole	0.5422748035907744
1	Taenia tecta	transverse gyri	-0.001157282405581466
1	Taenia tecta	amygdala	0.7159230911799002
1	Taenia tecta	globus pallidus	0.1811322546046193
1	Taenia tecta	caudate nucleus	0.32688561512710923
1	Taenia tecta	nucleus accumbens	0.4824522646194035
1	Taenia tecta	putamen	0.31526726810321504
1	Taenia tecta	septal nuclei	0.6043470843247839
1	Taenia tecta	substantia innominata	0.5315931032360586
1	Taenia tecta	epithalamus	0.4061791359861522
1	Taenia tecta	hypothalamus	0.4665827508781319
1	Taenia tecta	subthalamus	0.12100283782066698
1	Taenia tecta	thalamus	0.27171039892830556
1	Taenia tecta	inferior colliculus	0.12927484938259762
1	Taenia tecta	superior colliculus	0.23177796198376854
1	Taenia tecta	midbrain tegmentum	0.2530861011706653
1	Taenia tecta	pretectal region	0.25372441938006757
1	Taenia tecta	pons	0.11644443893957558
1	Taenia tecta	myelencephalon	0.1307208304294883
1	Taenia tecta	vermal I-II	0.28489125601667425
1	Taenia tecta	vermal III	0.2655004742993036
1	Taenia tecta	vermal IV	0.2756622940770451
1	Taenia tecta	vermal V	0.2427875125798505
1	Taenia tecta	vermal VI	0.2793320270667854
1	Taenia tecta	vermal VIIAf	0.24407120934354784
1	Taenia tecta	vermal VIIAt	0.25216666598964077
1	Taenia tecta	vermal VIIB	0.27136457792238766
1	Taenia tecta	vermal VIIIA	0.26884704241530555
1	Taenia tecta	vermal VIIIB	0.29828297518269825
1	Taenia tecta	vermal IX	0.3072676383609662
1	Taenia tecta	vermal X	0.35301699789819385
1	Taenia tecta	III	0.26045505502905225
1	Taenia tecta	IV	0.24744161981116397
1	Taenia tecta	V	0.2518034056919922
1	Taenia tecta	VI	0.2678390528396471
1	Taenia tecta	crus I	0.2568767049262552
1	Taenia tecta	crus II	0.2546182647095875
1	Taenia tecta	VIIB	0.26110425114537117
1	Taenia tecta	VIIIA	0.25936248298109765
1	Taenia tecta	VIIIB	0.2811838448509388
1	Taenia tecta	IX	0.22193774015895731
1	Taenia tecta	X	0.2618821382185685
1	Taenia tecta	cerebellar nuclei	0.06581379379175252
1	Cortical amygdalar area	claustrum	0.3697174249502688
1	Cortical amygdalar area	dentate gyrus	0.650798035130685
1	Cortical amygdalar area	CA1 field	0.6102947502386479
1	Cortical amygdalar area	CA2 field	0.7273093012839953
1	Cortical amygdalar area	CA3 field	0.7439997535770665
1	Cortical amygdalar area	CA4 field	0.7867689897787754
1	Cortical amygdalar area	subiculum	0.6357684157332579
1	Cortical amygdalar area	cingulate gyrus	0.21346488817894457
1	Cortical amygdalar area	parahippocampal gyrus	0.5238805283025908
1	Cortical amygdalar area	piriform cortex	0.8697188893870822
1	Cortical amygdalar area	anterior orbital gyrus	0.22260808439842256
1	Cortical amygdalar area	frontal operculum	0.22618554556916393
1	Cortical amygdalar area	frontal pole	0.15368652584766151
1	Cortical amygdalar area	gyrus rectus	0.33217369531108
1	Cortical amygdalar area	inferior frontal gyrus	0.09585665143663111
1	Cortical amygdalar area	inferior rostral gyrus	0.36137045374191656
1	Cortical amygdalar area	lateral orbital gyrus	0.15571820480666962
1	Cortical amygdalar area	medial orbital gyrus	0.30223600474482576
1	Cortical amygdalar area	middle frontal gyrus	0.09503067490501634
1	Cortical amygdalar area	paracentral lobule, anterior part	-0.15001916132094192
1	Cortical amygdalar area	paraterminal gyrus	0.6413468077179905
1	Cortical amygdalar area	parolfactory gyri	0.546764405467481
1	Cortical amygdalar area	posterior orbital gyrus	0.23539202837736792
1	Cortical amygdalar area	precentral gyrus	-0.2041948094477979
1	Cortical amygdalar area	superior frontal gyrus	0.13455571411692155
1	Cortical amygdalar area	superior rostral gyrus	0.2833392551441735
1	Cortical amygdalar area	insula	0.3255117316007987
1	Cortical amygdalar area	cuneus	-0.21480705236395423
1	Cortical amygdalar area	inferior occipital gyrus	-0.1271949227832738
1	Cortical amygdalar area	lingual gyrus	-0.2075879783498753
1	Cortical amygdalar area	occipital pole	-0.15778394719675967
1	Cortical amygdalar area	occipito-temporal gyrus	-0.025596561687960966
1	Cortical amygdalar area	superior occipital gyrus	-0.12560070318301153
1	Cortical amygdalar area	inferior parietal lobule	0.020463525006412974
1	Cortical amygdalar area	paracentral lobule, posterior part	-0.0038673368334308706
1	Cortical amygdalar area	postcentral gyrus	-0.21489748043850226
1	Cortical amygdalar area	precuneus	-0.030969445489799484
1	Cortical amygdalar area	superior parietal lobule	-0.11597339890749771
1	Cortical amygdalar area	fusiform gyrus	0.33052462312348363
1	Cortical amygdalar area	Heschl's gyrus	-0.06051235356372382
1	Cortical amygdalar area	inferior temporal gyrus	0.24546894756098672
1	Cortical amygdalar area	middle temporal gyrus	0.14345470728056692
1	Cortical amygdalar area	planum polare	0.2611291183718811
1	Cortical amygdalar area	planum temporale	-0.004547677755389935
1	Cortical amygdalar area	superior temporal gyrus	0.11813904866693262
1	Cortical amygdalar area	temporal pole	0.475101883979709
1	Cortical amygdalar area	transverse gyri	-0.10954355873484045
1	Cortical amygdalar area	amygdala	0.8439985757123627
1	Cortical amygdalar area	globus pallidus	0.162741047388469
1	Cortical amygdalar area	caudate nucleus	0.23769687323513766
1	Cortical amygdalar area	nucleus accumbens	0.4169243866553045
1	Cortical amygdalar area	putamen	0.21277088640067482
1	Cortical amygdalar area	septal nuclei	0.5570744832685631
1	Cortical amygdalar area	substantia innominata	0.5091531464322375
1	Cortical amygdalar area	epithalamus	0.4523695452246569
1	Cortical amygdalar area	hypothalamus	0.5143040363822178
1	Cortical amygdalar area	subthalamus	0.12207348402042686
1	Cortical amygdalar area	thalamus	0.2349948883504903
1	Cortical amygdalar area	inferior colliculus	0.05776864316722171
1	Cortical amygdalar area	superior colliculus	0.1614115130388927
1	Cortical amygdalar area	midbrain tegmentum	0.2975385955941391
1	Cortical amygdalar area	pretectal region	0.232925944079527
1	Cortical amygdalar area	pons	0.16124468665633127
1	Cortical amygdalar area	myelencephalon	0.17756200697344965
1	Cortical amygdalar area	vermal I-II	0.34310692440535473
1	Cortical amygdalar area	vermal III	0.3781799069579053
1	Cortical amygdalar area	vermal IV	0.4007617710583734
1	Cortical amygdalar area	vermal V	0.36944961908827983
1	Cortical amygdalar area	vermal VI	0.41314221338338375
1	Cortical amygdalar area	vermal VIIAf	0.3877994259739482
1	Cortical amygdalar area	vermal VIIAt	0.39914408678165747
1	Cortical amygdalar area	vermal VIIB	0.38002451213924954
1	Cortical amygdalar area	vermal VIIIA	0.40383845510016964
1	Cortical amygdalar area	vermal VIIIB	0.39264428151706204
1	Cortical amygdalar area	vermal IX	0.3940389033460629
1	Cortical amygdalar area	vermal X	0.4013838803345048
1	Cortical amygdalar area	III	0.35657333661143986
1	Cortical amygdalar area	IV	0.3831617174387431
1	Cortical amygdalar area	V	0.38971281769886956
1	Cortical amygdalar area	VI	0.4081418161011893
1	Cortical amygdalar area	crus I	0.40349257534494776
1	Cortical amygdalar area	crus II	0.3892204126218793
1	Cortical amygdalar area	VIIB	0.3840537939914323
1	Cortical amygdalar area	VIIIA	0.4020330445615385
1	Cortical amygdalar area	VIIIB	0.40621405638419655
1	Cortical amygdalar area	IX	0.3673267160688821
1	Cortical amygdalar area	X	0.35813401430801434
1	Cortical amygdalar area	cerebellar nuclei	0.0656689722817491
1	Piriform-amygdalar area	claustrum	0.4650188853647453
1	Piriform-amygdalar area	dentate gyrus	0.7501648315233638
1	Piriform-amygdalar area	CA1 field	0.6924953541928264
1	Piriform-amygdalar area	CA2 field	0.7846071085380721
1	Piriform-amygdalar area	CA3 field	0.79885331811783
1	Piriform-amygdalar area	CA4 field	0.8120854089371345
1	Piriform-amygdalar area	subiculum	0.6920278635442629
1	Piriform-amygdalar area	cingulate gyrus	0.3601083610990678
1	Piriform-amygdalar area	parahippocampal gyrus	0.6397152074873725
1	Piriform-amygdalar area	piriform cortex	0.8737670013119041
1	Piriform-amygdalar area	anterior orbital gyrus	0.3730122846380378
1	Piriform-amygdalar area	frontal operculum	0.37368599000163377
1	Piriform-amygdalar area	frontal pole	0.307148012334356
1	Piriform-amygdalar area	gyrus rectus	0.4787635423208038
1	Piriform-amygdalar area	inferior frontal gyrus	0.24940625524051646
1	Piriform-amygdalar area	inferior rostral gyrus	0.5069674409601639
1	Piriform-amygdalar area	lateral orbital gyrus	0.30999097202533543
1	Piriform-amygdalar area	medial orbital gyrus	0.4524363127196799
1	Piriform-amygdalar area	middle frontal gyrus	0.24991198789946936
1	Piriform-amygdalar area	paracentral lobule, anterior part	-0.012210529763312472
1	Piriform-amygdalar area	paraterminal gyrus	0.6491661457166141
1	Piriform-amygdalar area	parolfactory gyri	0.6440869262644179
1	Piriform-amygdalar area	posterior orbital gyrus	0.3845198078442514
1	Piriform-amygdalar area	precentral gyrus	-0.0722296795026293
1	Piriform-amygdalar area	superior frontal gyrus	0.2881550449181316
1	Piriform-amygdalar area	superior rostral gyrus	0.4298134099858881
1	Piriform-amygdalar area	insula	0.46854040101218974
1	Piriform-amygdalar area	cuneus	-0.0891903261673125
1	Piriform-amygdalar area	inferior occipital gyrus	0.016436394412735734
1	Piriform-amygdalar area	lingual gyrus	-0.08175139766767123
1	Piriform-amygdalar area	occipital pole	-0.012314772495328965
1	Piriform-amygdalar area	occipito-temporal gyrus	0.12540364717870547
1	Piriform-amygdalar area	superior occipital gyrus	0.01973082591603347
1	Piriform-amygdalar area	inferior parietal lobule	0.17494060648348225
1	Piriform-amygdalar area	paracentral lobule, posterior part	0.1426041013121679
1	Piriform-amygdalar area	postcentral gyrus	-0.0819181144956701
1	Piriform-amygdalar area	precuneus	0.12145094833774978
1	Piriform-amygdalar area	superior parietal lobule	0.0291380233788537
1	Piriform-amygdalar area	fusiform gyrus	0.4753605146931199
1	Piriform-amygdalar area	Heschl's gyrus	0.08545458079643746
1	Piriform-amygdalar area	inferior temporal gyrus	0.39741975166507565
1	Piriform-amygdalar area	middle temporal gyrus	0.29672387300472786
1	Piriform-amygdalar area	planum polare	0.4064366646291088
1	Piriform-amygdalar area	planum temporale	0.14378930510574506
1	Piriform-amygdalar area	superior temporal gyrus	0.2713166942722066
1	Piriform-amygdalar area	temporal pole	0.6047173214337794
1	Piriform-amygdalar area	transverse gyri	0.02415565619324434
1	Piriform-amygdalar area	amygdala	0.771175939922792
1	Piriform-amygdalar area	globus pallidus	0.16447816289384054
1	Piriform-amygdalar area	caudate nucleus	0.16033952823969527
1	Piriform-amygdalar area	nucleus accumbens	0.3225229404531239
1	Piriform-amygdalar area	putamen	0.13181746325964058
1	Piriform-amygdalar area	septal nuclei	0.43991394523815397
1	Piriform-amygdalar area	substantia innominata	0.4056081188839026
1	Piriform-amygdalar area	epithalamus	0.3778603155888596
1	Piriform-amygdalar area	hypothalamus	0.41213795336505893
1	Piriform-amygdalar area	subthalamus	0.11295750987849758
1	Piriform-amygdalar area	thalamus	0.23058776291130131
1	Piriform-amygdalar area	inferior colliculus	0.03802550304243804
1	Piriform-amygdalar area	superior colliculus	0.13455471817997666
1	Piriform-amygdalar area	midbrain tegmentum	0.2461836744834486
1	Piriform-amygdalar area	pretectal region	0.19868783154298525
1	Piriform-amygdalar area	pons	0.12912275704058895
1	Piriform-amygdalar area	myelencephalon	0.1421080122149499
1	Piriform-amygdalar area	vermal I-II	0.3468762644449837
1	Piriform-amygdalar area	vermal III	0.39974324266317174
1	Piriform-amygdalar area	vermal IV	0.4270258763737375
1	Piriform-amygdalar area	vermal V	0.4057908086813508
1	Piriform-amygdalar area	vermal VI	0.4370495606079186
1	Piriform-amygdalar area	vermal VIIAf	0.4197274079893928
1	Piriform-amygdalar area	vermal VIIAt	0.4364372593824895
1	Piriform-amygdalar area	vermal VIIB	0.4015642211518256
1	Piriform-amygdalar area	vermal VIIIA	0.43015077790278833
1	Piriform-amygdalar area	vermal VIIIB	0.4065216164055339
1	Piriform-amygdalar area	vermal IX	0.4100951957474023
1	Piriform-amygdalar area	vermal X	0.37373871530366215
1	Piriform-amygdalar area	III	0.3899706626726645
1	Piriform-amygdalar area	IV	0.4171511613794339
1	Piriform-amygdalar area	V	0.42391075815056867
1	Piriform-amygdalar area	VI	0.440106735582595
1	Piriform-amygdalar area	crus I	0.43432715025895796
1	Piriform-amygdalar area	crus II	0.42476642073690685
1	Piriform-amygdalar area	VIIB	0.41736964621670625
1	Piriform-amygdalar area	VIIIA	0.43793912512230754
1	Piriform-amygdalar area	VIIIB	0.43743781914132235
1	Piriform-amygdalar area	IX	0.40672720755613045
1	Piriform-amygdalar area	X	0.38032734898993215
1	Piriform-amygdalar area	cerebellar nuclei	0.06541937533317196
1	Main olfactory bulb	claustrum	0.21434373344298102
1	Main olfactory bulb	dentate gyrus	0.4402715289953898
1	Main olfactory bulb	CA1 field	0.4059499302009164
1	Main olfactory bulb	CA2 field	0.3450155474739923
1	Main olfactory bulb	CA3 field	0.3561739205028877
1	Main olfactory bulb	CA4 field	0.37594756056098694
1	Main olfactory bulb	subiculum	0.371612803600585
1	Main olfactory bulb	cingulate gyrus	0.29217259999850054
1	Main olfactory bulb	parahippocampal gyrus	0.34328922924733124
1	Main olfactory bulb	piriform cortex	0.4117404953090151
1	Main olfactory bulb	anterior orbital gyrus	0.2973362514941071
1	Main olfactory bulb	frontal operculum	0.24295548217815996
1	Main olfactory bulb	frontal pole	0.3236406888372584
1	Main olfactory bulb	gyrus rectus	0.29872493381330584
1	Main olfactory bulb	inferior frontal gyrus	0.22782298811240734
1	Main olfactory bulb	inferior rostral gyrus	0.30769444491133713
1	Main olfactory bulb	lateral orbital gyrus	0.29710882755303586
1	Main olfactory bulb	medial orbital gyrus	0.3026684996421258
1	Main olfactory bulb	middle frontal gyrus	0.25006618197934866
1	Main olfactory bulb	paracentral lobule, anterior part	0.1334175807303712
1	Main olfactory bulb	paraterminal gyrus	0.3603157846370063
1	Main olfactory bulb	parolfactory gyri	0.28935490302877825
1	Main olfactory bulb	posterior orbital gyrus	0.2841055925593682
1	Main olfactory bulb	precentral gyrus	0.11396497159863553
1	Main olfactory bulb	superior frontal gyrus	0.2587666189579134
1	Main olfactory bulb	superior rostral gyrus	0.2990847374903687
1	Main olfactory bulb	insula	0.2811199143120419
1	Main olfactory bulb	cuneus	0.17043052934487016
1	Main olfactory bulb	inferior occipital gyrus	0.18518490997753073
1	Main olfactory bulb	lingual gyrus	0.1778499860530428
1	Main olfactory bulb	occipital pole	0.17293789655799333
1	Main olfactory bulb	occipito-temporal gyrus	0.21026002722845555
1	Main olfactory bulb	superior occipital gyrus	0.20533407541413015
1	Main olfactory bulb	inferior parietal lobule	0.2341067047594341
1	Main olfactory bulb	paracentral lobule, posterior part	0.20999818972459133
1	Main olfactory bulb	postcentral gyrus	0.14336364467854051
1	Main olfactory bulb	precuneus	0.23715982359876925
1	Main olfactory bulb	superior parietal lobule	0.1963483623028199
1	Main olfactory bulb	fusiform gyrus	0.2646070440245518
1	Main olfactory bulb	Heschl's gyrus	0.20755604313236412
1	Main olfactory bulb	inferior temporal gyrus	0.2747349429311179
1	Main olfactory bulb	middle temporal gyrus	0.2566046756889698
1	Main olfactory bulb	planum polare	0.264134682227109
1	Main olfactory bulb	planum temporale	0.2557522729061854
1	Main olfactory bulb	superior temporal gyrus	0.24141261968774427
1	Main olfactory bulb	temporal pole	0.29304271045475394
1	Main olfactory bulb	transverse gyri	0.17740847438728574
1	Main olfactory bulb	amygdala	0.2887511211104191
1	Main olfactory bulb	globus pallidus	0.28855142518521276
1	Main olfactory bulb	caudate nucleus	0.05190263657969202
1	Main olfactory bulb	nucleus accumbens	0.08286679762024773
1	Main olfactory bulb	putamen	0.07059755784929694
1	Main olfactory bulb	septal nuclei	0.2730911319923288
1	Main olfactory bulb	substantia innominata	0.145487687005119
1	Main olfactory bulb	epithalamus	0.29573566868884404
1	Main olfactory bulb	hypothalamus	0.14671861407656214
1	Main olfactory bulb	subthalamus	0.17804292687903694
1	Main olfactory bulb	thalamus	0.43369298639436943
1	Main olfactory bulb	inferior colliculus	0.21033941518246316
1	Main olfactory bulb	superior colliculus	0.2525912718023256
1	Main olfactory bulb	midbrain tegmentum	0.15633472318043404
1	Main olfactory bulb	pretectal region	0.25661270258818736
1	Main olfactory bulb	pons	0.097262305007213945
1	Main olfactory bulb	myelencephalon	0.12234321024142251
1	Main olfactory bulb	vermal I-II	0.545581138540976
1	Main olfactory bulb	vermal III	0.6313696507930318
1	Main olfactory bulb	vermal IV	0.652140854445829
1	Main olfactory bulb	vermal V	0.647660887323595
1	Main olfactory bulb	vermal VI	0.6253166747336599
1	Main olfactory bulb	vermal VIIAf	0.6521343523336456
1	Main olfactory bulb	vermal VIIAt	0.6488663856972423
1	Main olfactory bulb	vermal VIIB	0.624215112640853
1	Main olfactory bulb	vermal VIIIA	0.6392340028127843
1	Main olfactory bulb	vermal VIIIB	0.6204711644319609
1	Main olfactory bulb	vermal IX	0.6170928838204494
1	Main olfactory bulb	vermal X	0.5115963823578528
1	Main olfactory bulb	III	0.6354929971010123
1	Main olfactory bulb	IV	0.6379661440265638
1	Main olfactory bulb	V	0.6428935445400676
1	Main olfactory bulb	VI	0.6482151309668736
1	Main olfactory bulb	crus I	0.6378418464665941
1	Main olfactory bulb	crus II	0.6368518018935613
1	Main olfactory bulb	VIIB	0.6368004946862744
1	Main olfactory bulb	VIIIA	0.6455296387737252
1	Main olfactory bulb	VIIIB	0.6361121875754696
1	Main olfactory bulb	IX	0.6249371376860781
1	Main olfactory bulb	X	0.6016725463527621
1	Main olfactory bulb	cerebellar nuclei	0.17263493588233084
1	Accessory olfactory bulb	claustrum	0.4619967557456426
1	Accessory olfactory bulb	dentate gyrus	0.6058647001112939
1	Accessory olfactory bulb	CA1 field	0.5350971233887609
1	Accessory olfactory bulb	CA2 field	0.3985905566962359
1	Accessory olfactory bulb	CA3 field	0.39190168879240717
1	Accessory olfactory bulb	CA4 field	0.35692983840744946
1	Accessory olfactory bulb	subiculum	0.4647640004489299
1	Accessory olfactory bulb	cingulate gyrus	0.5974347328326419
1	Accessory olfactory bulb	parahippocampal gyrus	0.5602531936531061
1	Accessory olfactory bulb	piriform cortex	0.43134519027825463
1	Accessory olfactory bulb	anterior orbital gyrus	0.6056017621896402
1	Accessory olfactory bulb	frontal operculum	0.5483299620659856
1	Accessory olfactory bulb	frontal pole	0.6259527052299527
1	Accessory olfactory bulb	gyrus rectus	0.5792626460153553
1	Accessory olfactory bulb	inferior frontal gyrus	0.5501961960582116
1	Accessory olfactory bulb	inferior rostral gyrus	0.5780203919817469
1	Accessory olfactory bulb	lateral orbital gyrus	0.6087279720132125
1	Accessory olfactory bulb	medial orbital gyrus	0.589298558356534
1	Accessory olfactory bulb	middle frontal gyrus	0.5651325418325168
1	Accessory olfactory bulb	paracentral lobule, anterior part	0.45915180854568893
1	Accessory olfactory bulb	paraterminal gyrus	0.5274449109295726
1	Accessory olfactory bulb	parolfactory gyri	0.5066013559516072
1	Accessory olfactory bulb	posterior orbital gyrus	0.5854984928319572
1	Accessory olfactory bulb	precentral gyrus	0.42439124310175746
1	Accessory olfactory bulb	superior frontal gyrus	0.5722973054784276
1	Accessory olfactory bulb	superior rostral gyrus	0.5954437085151046
1	Accessory olfactory bulb	insula	0.5688696688472434
1	Accessory olfactory bulb	cuneus	0.4547043497957523
1	Accessory olfactory bulb	inferior occipital gyrus	0.49876871195936173
1	Accessory olfactory bulb	lingual gyrus	0.4631659337094331
1	Accessory olfactory bulb	occipital pole	0.46995404781940847
1	Accessory olfactory bulb	occipito-temporal gyrus	0.5340520135916033
1	Accessory olfactory bulb	superior occipital gyrus	0.518002517453549
1	Accessory olfactory bulb	inferior parietal lobule	0.5563689921215521
1	Accessory olfactory bulb	paracentral lobule, posterior part	0.5239954151743834
1	Accessory olfactory bulb	postcentral gyrus	0.4498720658381779
1	Accessory olfactory bulb	precuneus	0.5538159645987343
1	Accessory olfactory bulb	superior parietal lobule	0.5099163387023522
1	Accessory olfactory bulb	fusiform gyrus	0.5484611971201553
1	Accessory olfactory bulb	Heschl's gyrus	0.5290954694297183
1	Accessory olfactory bulb	inferior temporal gyrus	0.5750094325007229
1	Accessory olfactory bulb	middle temporal gyrus	0.5727490514699284
1	Accessory olfactory bulb	planum polare	0.5690159342512675
1	Accessory olfactory bulb	planum temporale	0.5702663936719733
1	Accessory olfactory bulb	superior temporal gyrus	0.5633527426628537
1	Accessory olfactory bulb	temporal pole	0.5252864857856926
1	Accessory olfactory bulb	transverse gyri	0.5037265738751837
1	Accessory olfactory bulb	amygdala	0.3055576558614756
1	Accessory olfactory bulb	globus pallidus	0.24845702330291003
1	Accessory olfactory bulb	caudate nucleus	0.24465349882170545
1	Accessory olfactory bulb	nucleus accumbens	0.22042640857625345
1	Accessory olfactory bulb	putamen	0.24468463616377606
1	Accessory olfactory bulb	septal nuclei	0.21215511675229445
1	Accessory olfactory bulb	substantia innominata	0.07782696806832085
1	Accessory olfactory bulb	epithalamus	0.188362885371912
1	Accessory olfactory bulb	hypothalamus	0.04898253367321851
1	Accessory olfactory bulb	subthalamus	0.13714601350946815
1	Accessory olfactory bulb	thalamus	0.3628234840290783
1	Accessory olfactory bulb	inferior colliculus	0.22775909873934702
1	Accessory olfactory bulb	superior colliculus	0.23814423991201178
1	Accessory olfactory bulb	midbrain tegmentum	0.0828394193519673
1	Accessory olfactory bulb	pretectal region	0.21042165564601345
1	Accessory olfactory bulb	pons	0.042424018171519765
1	Accessory olfactory bulb	myelencephalon	0.05934581527208082
1	Accessory olfactory bulb	vermal I-II	0.4589539250903327
1	Accessory olfactory bulb	vermal III	0.535202281482209
1	Accessory olfactory bulb	vermal IV	0.5484518260568267
1	Accessory olfactory bulb	vermal V	0.5512025411016265
1	Accessory olfactory bulb	vermal VI	0.516970365916032
1	Accessory olfactory bulb	vermal VIIAf	0.5456009325101625
1	Accessory olfactory bulb	vermal VIIAt	0.541331030643174
1	Accessory olfactory bulb	vermal VIIB	0.5252139139892001
1	Accessory olfactory bulb	vermal VIIIA	0.5340023336526523
1	Accessory olfactory bulb	vermal VIIIB	0.5212230211038649
1	Accessory olfactory bulb	vermal IX	0.5119924294044438
1	Accessory olfactory bulb	vermal X	0.4045537978695019
1	Accessory olfactory bulb	III	0.5451015921241292
1	Accessory olfactory bulb	IV	0.5335563888093164
1	Accessory olfactory bulb	V	0.5396201055004722
1	Accessory olfactory bulb	VI	0.5406747432210547
1	Accessory olfactory bulb	crus I	0.529148589784085
1	Accessory olfactory bulb	crus II	0.5300265839496576
1	Accessory olfactory bulb	VIIB	0.5329286970577828
1	Accessory olfactory bulb	VIIIA	0.5355815412093314
1	Accessory olfactory bulb	VIIIB	0.5228663462754096
1	Accessory olfactory bulb	IX	0.5178655710761331
1	Accessory olfactory bulb	X	0.49882270936509443
1	Accessory olfactory bulb	cerebellar nuclei	0.14363371789593793
1	Anterior olfactory nucleus	claustrum	0.4854553263923157
1	Anterior olfactory nucleus	dentate gyrus	0.7365407435485267
1	Anterior olfactory nucleus	CA1 field	0.6572062306365617
1	Anterior olfactory nucleus	CA2 field	0.7195780822336044
1	Anterior olfactory nucleus	CA3 field	0.7323793775659616
1	Anterior olfactory nucleus	CA4 field	0.7212970968939044
1	Anterior olfactory nucleus	subiculum	0.6660656314208341
1	Anterior olfactory nucleus	cingulate gyrus	0.3705335430747611
1	Anterior olfactory nucleus	parahippocampal gyrus	0.5920653031594554
1	Anterior olfactory nucleus	piriform cortex	0.81149814602749
1	Anterior olfactory nucleus	anterior orbital gyrus	0.387260593102646
1	Anterior olfactory nucleus	frontal operculum	0.3811888759043617
1	Anterior olfactory nucleus	frontal pole	0.2976081077842744
1	Anterior olfactory nucleus	gyrus rectus	0.4774821966090119
1	Anterior olfactory nucleus	inferior frontal gyrus	0.255909403077895
1	Anterior olfactory nucleus	inferior rostral gyrus	0.49339040456037997
1	Anterior olfactory nucleus	lateral orbital gyrus	0.30570982412453784
1	Anterior olfactory nucleus	medial orbital gyrus	0.4581446679794858
1	Anterior olfactory nucleus	middle frontal gyrus	0.26213653537517834
1	Anterior olfactory nucleus	paracentral lobule, anterior part	0.017669856573738006
1	Anterior olfactory nucleus	paraterminal gyrus	0.6110819298423598
1	Anterior olfactory nucleus	parolfactory gyri	0.6451817772958534
1	Anterior olfactory nucleus	posterior orbital gyrus	0.39769769657079446
1	Anterior olfactory nucleus	precentral gyrus	-0.05264767583596141
1	Anterior olfactory nucleus	superior frontal gyrus	0.30248638487748336
1	Anterior olfactory nucleus	superior rostral gyrus	0.44030862679498356
1	Anterior olfactory nucleus	insula	0.4614927403312877
1	Anterior olfactory nucleus	cuneus	-0.10935951343038547
1	Anterior olfactory nucleus	inferior occipital gyrus	0.013071677437429612
1	Anterior olfactory nucleus	lingual gyrus	-0.11145502443770408
1	Anterior olfactory nucleus	occipital pole	-0.038071358346570806
1	Anterior olfactory nucleus	occipito-temporal gyrus	0.11607853648219853
1	Anterior olfactory nucleus	superior occipital gyrus	0.028263607605757468
1	Anterior olfactory nucleus	inferior parietal lobule	0.1810865198980324
1	Anterior olfactory nucleus	paracentral lobule, posterior part	0.1281432473777128
1	Anterior olfactory nucleus	postcentral gyrus	-0.06854778902660036
1	Anterior olfactory nucleus	precuneus	0.125127878122405
1	Anterior olfactory nucleus	superior parietal lobule	0.029597795970656742
1	Anterior olfactory nucleus	fusiform gyrus	0.45990577868523896
1	Anterior olfactory nucleus	Heschl's gyrus	0.07608071685639692
1	Anterior olfactory nucleus	inferior temporal gyrus	0.3864618986138783
1	Anterior olfactory nucleus	middle temporal gyrus	0.29313216786780716
1	Anterior olfactory nucleus	planum polare	0.41574945148720804
1	Anterior olfactory nucleus	planum temporale	0.12547718035063687
1	Anterior olfactory nucleus	superior temporal gyrus	0.2800244301729027
1	Anterior olfactory nucleus	temporal pole	0.5855680907538107
1	Anterior olfactory nucleus	transverse gyri	0.00793885012406101
1	Anterior olfactory nucleus	amygdala	0.6723375505885948
1	Anterior olfactory nucleus	globus pallidus	0.20557618059430155
1	Anterior olfactory nucleus	caudate nucleus	0.2053048466148017
1	Anterior olfactory nucleus	nucleus accumbens	0.33877995347636114
1	Anterior olfactory nucleus	putamen	0.19606398548907103
1	Anterior olfactory nucleus	septal nuclei	0.4744183157619457
1	Anterior olfactory nucleus	substantia innominata	0.3940586840768101
1	Anterior olfactory nucleus	epithalamus	0.3729137569169052
1	Anterior olfactory nucleus	hypothalamus	0.36424554316242397
1	Anterior olfactory nucleus	subthalamus	0.11830053376918331
1	Anterior olfactory nucleus	thalamus	0.35595804930071623
1	Anterior olfactory nucleus	inferior colliculus	0.1139357162332663
1	Anterior olfactory nucleus	superior colliculus	0.20241493413797654
1	Anterior olfactory nucleus	midbrain tegmentum	0.2131584712153033
1	Anterior olfactory nucleus	pretectal region	0.23564892149022834
1	Anterior olfactory nucleus	pons	0.08036915154704664
1	Anterior olfactory nucleus	myelencephalon	0.09706935200015468
1	Anterior olfactory nucleus	vermal I-II	0.3978805125735793
1	Anterior olfactory nucleus	vermal III	0.43597781758378423
1	Anterior olfactory nucleus	vermal IV	0.45929309234348986
1	Anterior olfactory nucleus	vermal V	0.43452592429014125
1	Anterior olfactory nucleus	vermal VI	0.4572097730663631
1	Anterior olfactory nucleus	vermal VIIAf	0.4348388626096676
1	Anterior olfactory nucleus	vermal VIIAt	0.45269292652400484
1	Anterior olfactory nucleus	vermal VIIB	0.4402073569495365
1	Anterior olfactory nucleus	vermal VIIIA	0.4531595231002813
1	Anterior olfactory nucleus	vermal VIIIB	0.4562431477970563
1	Anterior olfactory nucleus	vermal IX	0.46172341172818926
1	Anterior olfactory nucleus	vermal X	0.4290759378343843
1	Anterior olfactory nucleus	III	0.4383252045652965
1	Anterior olfactory nucleus	IV	0.43797420141869525
1	Anterior olfactory nucleus	V	0.44534187876657594
1	Anterior olfactory nucleus	VI	0.46056883816973876
1	Anterior olfactory nucleus	crus I	0.4478148392346628
1	Anterior olfactory nucleus	crus II	0.44354936868663974
1	Anterior olfactory nucleus	VIIB	0.4460057263683636
1	Anterior olfactory nucleus	VIIIA	0.45407545979511105
1	Anterior olfactory nucleus	VIIIB	0.46515761566428604
1	Anterior olfactory nucleus	IX	0.41723289802584773
1	Anterior olfactory nucleus	X	0.41916496753798677
1	Anterior olfactory nucleus	cerebellar nuclei	0.06175659884315009
1	Subiculum	claustrum	0.1634121399225948
1	Subiculum	dentate gyrus	0.5442575703003175
1	Subiculum	CA1 field	0.7200645326623066
1	Subiculum	CA2 field	0.5606037156896383
1	Subiculum	CA3 field	0.5174484705960188
1	Subiculum	CA4 field	0.5039419351929265
1	Subiculum	subiculum	0.7266531842227671
1	Subiculum	cingulate gyrus	0.5320123335962313
1	Subiculum	parahippocampal gyrus	0.5672665786809685
1	Subiculum	piriform cortex	0.32579794103392096
1	Subiculum	anterior orbital gyrus	0.48998101389353604
1	Subiculum	frontal operculum	0.42543500618300023
1	Subiculum	frontal pole	0.5203843098565838
1	Subiculum	gyrus rectus	0.4735422367859587
1	Subiculum	inferior frontal gyrus	0.4345865582384016
1	Subiculum	inferior rostral gyrus	0.5044363850952687
1	Subiculum	lateral orbital gyrus	0.48865142945793827
1	Subiculum	medial orbital gyrus	0.48531502758281647
1	Subiculum	middle frontal gyrus	0.48646220061662476
1	Subiculum	paracentral lobule, anterior part	0.3696174946989779
1	Subiculum	paraterminal gyrus	0.6116317261851028
1	Subiculum	parolfactory gyri	0.4398678588899631
1	Subiculum	posterior orbital gyrus	0.4243148746827249
1	Subiculum	precentral gyrus	0.3589443473538141
1	Subiculum	superior frontal gyrus	0.4927352167550748
1	Subiculum	superior rostral gyrus	0.5018212012139073
1	Subiculum	insula	0.4542118870905099
1	Subiculum	cuneus	0.34879407513178823
1	Subiculum	inferior occipital gyrus	0.3804806669448779
1	Subiculum	lingual gyrus	0.35208573868969445
1	Subiculum	occipital pole	0.34337571067908146
1	Subiculum	occipito-temporal gyrus	0.42430211024511477
1	Subiculum	superior occipital gyrus	0.4098132758415817
1	Subiculum	inferior parietal lobule	0.4669177281186759
1	Subiculum	paracentral lobule, posterior part	0.49588104299819274
1	Subiculum	postcentral gyrus	0.3578227012085333
1	Subiculum	precuneus	0.4637824469894581
1	Subiculum	superior parietal lobule	0.4327125733661922
1	Subiculum	fusiform gyrus	0.4656452496635866
1	Subiculum	Heschl's gyrus	0.4062899037854008
1	Subiculum	inferior temporal gyrus	0.4778291653102889
1	Subiculum	middle temporal gyrus	0.4640841308129476
1	Subiculum	planum polare	0.44545971101548587
1	Subiculum	planum temporale	0.5059748665119127
1	Subiculum	superior temporal gyrus	0.4574403004950792
1	Subiculum	temporal pole	0.448801531877239
1	Subiculum	transverse gyri	0.40392772823327394
1	Subiculum	amygdala	0.339668698292617
1	Subiculum	globus pallidus	0.21274287472451497
1	Subiculum	caudate nucleus	0.036271679517592866
1	Subiculum	nucleus accumbens	0.038991980236219886
1	Subiculum	putamen	0.01725984778113126
1	Subiculum	septal nuclei	0.14874077286964657
1	Subiculum	substantia innominata	0.038522191315799446
1	Subiculum	epithalamus	0.1708638328364109
1	Subiculum	hypothalamus	0.14417869924562005
1	Subiculum	subthalamus	0.2601840990279342
1	Subiculum	thalamus	0.2862945454397441
1	Subiculum	inferior colliculus	0.31665793796357444
1	Subiculum	superior colliculus	0.32311660287376803
1	Subiculum	midbrain tegmentum	0.221891126363028
1	Subiculum	pretectal region	0.261153487774506
1	Subiculum	pons	0.24293127885064336
1	Subiculum	myelencephalon	0.2071078277951977
1	Subiculum	vermal I-II	0.23048386102577226
1	Subiculum	vermal III	0.23288720633677476
1	Subiculum	vermal IV	0.22896067295230493
1	Subiculum	vermal V	0.23140575129183924
1	Subiculum	vermal VI	0.2136787328046867
1	Subiculum	vermal VIIAf	0.22517647962829943
1	Subiculum	vermal VIIAt	0.20206598554388025
1	Subiculum	vermal VIIB	0.20379578238113363
1	Subiculum	vermal VIIIA	0.20821639839509862
1	Subiculum	vermal VIIIB	0.2148574444663379
1	Subiculum	vermal IX	0.19399908299196453
1	Subiculum	vermal X	0.20820920201208934
1	Subiculum	III	0.24912653623544107
1	Subiculum	IV	0.22520219047270398
1	Subiculum	V	0.22186466608823305
1	Subiculum	VI	0.21851795747623928
1	Subiculum	crus I	0.20498000598709443
1	Subiculum	crus II	0.19423705478270326
1	Subiculum	VIIB	0.2043939958874811
1	Subiculum	VIIIA	0.1934683429589172
1	Subiculum	VIIIB	0.1941300403618424
1	Subiculum	IX	0.1804102527101554
1	Subiculum	X	0.21779432450385883
1	Subiculum	cerebellar nuclei	0.23703801209839798
1	Entorhinal area	claustrum	0.5345846213109448
1	Entorhinal area	dentate gyrus	0.4772257342076134
1	Entorhinal area	CA1 field	0.5139126946993773
1	Entorhinal area	CA2 field	0.4769602946995995
1	Entorhinal area	CA3 field	0.44289028699547167
1	Entorhinal area	CA4 field	0.45656813206028685
1	Entorhinal area	subiculum	0.4559011219136896
1	Entorhinal area	cingulate gyrus	0.44587327934483106
1	Entorhinal area	parahippocampal gyrus	0.635690658480445
1	Entorhinal area	piriform cortex	0.560125419681283
1	Entorhinal area	anterior orbital gyrus	0.4379013483967788
1	Entorhinal area	frontal operculum	0.4524174060752172
1	Entorhinal area	frontal pole	0.4698145899045703
1	Entorhinal area	gyrus rectus	0.521861791270048
1	Entorhinal area	inferior frontal gyrus	0.3528990799667196
1	Entorhinal area	inferior rostral gyrus	0.536086489737773
1	Entorhinal area	lateral orbital gyrus	0.42301390872626743
1	Entorhinal area	medial orbital gyrus	0.4906735920092899
1	Entorhinal area	middle frontal gyrus	0.34863435647332053
1	Entorhinal area	paracentral lobule, anterior part	0.12707817877487965
1	Entorhinal area	paraterminal gyrus	0.4577005432351335
1	Entorhinal area	parolfactory gyri	0.5088212974856603
1	Entorhinal area	posterior orbital gyrus	0.4643438124238244
1	Entorhinal area	precentral gyrus	0.10315408132793825
1	Entorhinal area	superior frontal gyrus	0.3834535820151969
1	Entorhinal area	superior rostral gyrus	0.46459572461850157
1	Entorhinal area	insula	0.512600699130473
1	Entorhinal area	cuneus	0.0837855558082013
1	Entorhinal area	inferior occipital gyrus	0.18853185061165567
1	Entorhinal area	lingual gyrus	0.11981178195195782
1	Entorhinal area	occipital pole	0.1443079192404066
1	Entorhinal area	occipito-temporal gyrus	0.28542761469689204
1	Entorhinal area	superior occipital gyrus	0.16792224097756026
1	Entorhinal area	inferior parietal lobule	0.3073067388495404
1	Entorhinal area	paracentral lobule, posterior part	0.26398763236903483
1	Entorhinal area	postcentral gyrus	0.08546832377762842
1	Entorhinal area	precuneus	0.27599940948292573
1	Entorhinal area	superior parietal lobule	0.20717173152699528
1	Entorhinal area	fusiform gyrus	0.5129621083360167
1	Entorhinal area	Heschl's gyrus	0.2601501148301373
1	Entorhinal area	inferior temporal gyrus	0.48151673181203286
1	Entorhinal area	middle temporal gyrus	0.41700450351884133
1	Entorhinal area	planum polare	0.44836318367954353
1	Entorhinal area	planum temporale	0.3218317054279663
1	Entorhinal area	superior temporal gyrus	0.3687761003479807
1	Entorhinal area	temporal pole	0.5771416422554663
1	Entorhinal area	transverse gyri	0.22723919892460778
1	Entorhinal area	amygdala	0.3915278941670953
1	Entorhinal area	globus pallidus	0.130370925566761
1	Entorhinal area	caudate nucleus	-0.02955012367960184
1	Entorhinal area	nucleus accumbens	0.018721202465490316
1	Entorhinal area	putamen	-0.05651801648971816
1	Entorhinal area	septal nuclei	-0.02005704021063889
1	Entorhinal area	substantia innominata	-0.03246018719927053
1	Entorhinal area	epithalamus	0.10723759608123602
1	Entorhinal area	hypothalamus	0.031065012715144637
1	Entorhinal area	subthalamus	0.10360343397007282
1	Entorhinal area	thalamus	0.0894293122400485
1	Entorhinal area	inferior colliculus	0.033848089213346484
1	Entorhinal area	superior colliculus	0.01300351158998225
1	Entorhinal area	midbrain tegmentum	0.1021121302135097
1	Entorhinal area	pretectal region	0.06561773840228839
1	Entorhinal area	pons	0.12954104308936257
1	Entorhinal area	myelencephalon	0.13793905096486317
1	Entorhinal area	vermal I-II	0.25425140854799294
1	Entorhinal area	vermal III	0.33701654291942107
1	Entorhinal area	vermal IV	0.3577054050345082
1	Entorhinal area	vermal V	0.3657771465900507
1	Entorhinal area	vermal VI	0.366124285756286
1	Entorhinal area	vermal VIIAf	0.3848665543813229
1	Entorhinal area	vermal VIIAt	0.3915562425427465
1	Entorhinal area	vermal VIIB	0.33010792327077876
1	Entorhinal area	vermal VIIIA	0.3729962714519587
1	Entorhinal area	vermal VIIIB	0.3134909947405453
1	Entorhinal area	vermal IX	0.3116876160361836
1	Entorhinal area	vermal X	0.21718741485555773
1	Entorhinal area	III	0.32986854584524083
1	Entorhinal area	IV	0.3755848638944338
1	Entorhinal area	V	0.37824926382027796
1	Entorhinal area	VI	0.38013462809961995
1	Entorhinal area	crus I	0.3864399864785349
1	Entorhinal area	crus II	0.3789181070623633
1	Entorhinal area	VIIB	0.36462683819532843
1	Entorhinal area	VIIIA	0.3881886612771906
1	Entorhinal area	VIIIB	0.3675420144282289
1	Entorhinal area	IX	0.39302982187611946
1	Entorhinal area	X	0.3288346140575576
1	Entorhinal area	cerebellar nuclei	0.12601196712582563
1	Field CA1	claustrum	0.30271448174201543
1	Field CA1	dentate gyrus	0.6919149394768453
1	Field CA1	CA1 field	0.8374240067191396
1	Field CA1	CA2 field	0.708883087857704
1	Field CA1	CA3 field	0.6708543910520067
1	Field CA1	CA4 field	0.6440907153725955
1	Field CA1	subiculum	0.792479750869565
1	Field CA1	cingulate gyrus	0.609760807574194
1	Field CA1	parahippocampal gyrus	0.686491042258694
1	Field CA1	piriform cortex	0.4201254147356826
1	Field CA1	anterior orbital gyrus	0.5781829630536671
1	Field CA1	frontal operculum	0.535737656625894
1	Field CA1	frontal pole	0.5793562552742101
1	Field CA1	gyrus rectus	0.5970258118823655
1	Field CA1	inferior frontal gyrus	0.510121793405542
1	Field CA1	inferior rostral gyrus	0.6258398821359501
1	Field CA1	lateral orbital gyrus	0.5578366401951833
1	Field CA1	medial orbital gyrus	0.5984362660609577
1	Field CA1	middle frontal gyrus	0.5491155880065357
1	Field CA1	paracentral lobule, anterior part	0.386162443789639
1	Field CA1	paraterminal gyrus	0.6100171198268368
1	Field CA1	parolfactory gyri	0.5687988410707183
1	Field CA1	posterior orbital gyrus	0.533565403468883
1	Field CA1	precentral gyrus	0.35831385359549517
1	Field CA1	superior frontal gyrus	0.5670638462811853
1	Field CA1	superior rostral gyrus	0.6029308789490591
1	Field CA1	insula	0.5786502796213255
1	Field CA1	cuneus	0.3181202392626943
1	Field CA1	inferior occipital gyrus	0.39448401194436294
1	Field CA1	lingual gyrus	0.31900274373529564
1	Field CA1	occipital pole	0.35318225362057937
1	Field CA1	occipito-temporal gyrus	0.46554205700104156
1	Field CA1	superior occipital gyrus	0.415155351908386
1	Field CA1	inferior parietal lobule	0.5160176526514381
1	Field CA1	paracentral lobule, posterior part	0.5164790140528598
1	Field CA1	postcentral gyrus	0.3510010395647905
1	Field CA1	precuneus	0.49075256753048774
1	Field CA1	superior parietal lobule	0.4401453305300618
1	Field CA1	fusiform gyrus	0.6000287635042585
1	Field CA1	Heschl's gyrus	0.43557208954682614
1	Field CA1	inferior temporal gyrus	0.5859761108859128
1	Field CA1	middle temporal gyrus	0.5494366327193948
1	Field CA1	planum polare	0.565557972234252
1	Field CA1	planum temporale	0.5222481189246316
1	Field CA1	superior temporal gyrus	0.5370496404529748
1	Field CA1	temporal pole	0.6082426143415931
1	Field CA1	transverse gyri	0.406271544283871
1	Field CA1	amygdala	0.3514832246123302
1	Field CA1	globus pallidus	0.2594407353274163
1	Field CA1	caudate nucleus	-0.02323179466860304
1	Field CA1	nucleus accumbens	-0.01001539036178863
1	Field CA1	putamen	-0.04798814703446936
1	Field CA1	septal nuclei	0.08490909998562306
1	Field CA1	substantia innominata	0.02178355599120066
1	Field CA1	epithalamus	0.16042074872423612
1	Field CA1	hypothalamus	0.11254474325730585
1	Field CA1	subthalamus	0.28402777704563614
1	Field CA1	thalamus	0.3190890579869517
1	Field CA1	inferior colliculus	0.269285329300081
1	Field CA1	superior colliculus	0.29717925056418715
1	Field CA1	midbrain tegmentum	0.22775866373852072
1	Field CA1	pretectal region	0.2554519142388404
1	Field CA1	pons	0.24627296820576544
1	Field CA1	myelencephalon	0.20463739471771913
1	Field CA1	vermal I-II	0.23192726217243453
1	Field CA1	vermal III	0.2366561532047292
1	Field CA1	vermal IV	0.24112609549855532
1	Field CA1	vermal V	0.2503847554999943
1	Field CA1	vermal VI	0.23186266969790925
1	Field CA1	vermal VIIAf	0.23586745322808353
1	Field CA1	vermal VIIAt	0.23032995799724063
1	Field CA1	vermal VIIB	0.214494976732998
1	Field CA1	vermal VIIIA	0.22075579299509837
1	Field CA1	vermal VIIIB	0.21668997468959675
1	Field CA1	vermal IX	0.20448750704366991
1	Field CA1	vermal X	0.18849295360032295
1	Field CA1	III	0.2724629814897649
1	Field CA1	IV	0.2517938706967873
1	Field CA1	V	0.24750096172092634
1	Field CA1	VI	0.24389452507291887
1	Field CA1	crus I	0.22820991495301607
1	Field CA1	crus II	0.22174809310991705
1	Field CA1	VIIB	0.22849502634380053
1	Field CA1	VIIIA	0.22238867288473219
1	Field CA1	VIIIB	0.22616330744410532
1	Field CA1	IX	0.21194318281988805
1	Field CA1	X	0.22960728841077235
1	Field CA1	cerebellar nuclei	0.2513467715756383
1	Field CA2	claustrum	0.3648597862940075
1	Field CA2	dentate gyrus	0.7451539367984463
1	Field CA2	CA1 field	0.8630919675564114
1	Field CA2	CA2 field	0.7735052465780387
1	Field CA2	CA3 field	0.7452780461458478
1	Field CA2	CA4 field	0.7122040483480622
1	Field CA2	subiculum	0.8078688063918916
1	Field CA2	cingulate gyrus	0.6217674046579567
1	Field CA2	parahippocampal gyrus	0.7202249816456792
1	Field CA2	piriform cortex	0.4856447462413666
1	Field CA2	anterior orbital gyrus	0.5988537893836441
1	Field CA2	frontal operculum	0.5660682806717008
1	Field CA2	frontal pole	0.5831408841669913
1	Field CA2	gyrus rectus	0.6321828283906584
1	Field CA2	inferior frontal gyrus	0.5238656810695518
1	Field CA2	inferior rostral gyrus	0.6600515757208258
1	Field CA2	lateral orbital gyrus	0.5681857267401449
1	Field CA2	medial orbital gyrus	0.6304362696184249
1	Field CA2	middle frontal gyrus	0.5566231431245593
1	Field CA2	paracentral lobule, anterior part	0.3721468760375944
1	Field CA2	paraterminal gyrus	0.6089155768173004
1	Field CA2	parolfactory gyri	0.6224204506796615
1	Field CA2	posterior orbital gyrus	0.5645399155984969
1	Field CA2	precentral gyrus	0.33501890590526984
1	Field CA2	superior frontal gyrus	0.5791149013617184
1	Field CA2	superior rostral gyrus	0.6284736878713703
1	Field CA2	insula	0.6146111655499321
1	Field CA2	cuneus	0.2859021226693935
1	Field CA2	inferior occipital gyrus	0.3786118348762646
1	Field CA2	lingual gyrus	0.2848826835827442
1	Field CA2	occipital pole	0.33881398788078587
1	Field CA2	occipito-temporal gyrus	0.4603179896271801
1	Field CA2	superior occipital gyrus	0.39671258955593075
1	Field CA2	inferior parietal lobule	0.5140050542027121
1	Field CA2	paracentral lobule, posterior part	0.5019165608476706
1	Field CA2	postcentral gyrus	0.3250501405058897
1	Field CA2	precuneus	0.4798183417995423
1	Field CA2	superior parietal lobule	0.4191671628096525
1	Field CA2	fusiform gyrus	0.6371935237117855
1	Field CA2	Heschl's gyrus	0.4241870716491975
1	Field CA2	inferior temporal gyrus	0.6113005519417589
1	Field CA2	middle temporal gyrus	0.563092646796133
1	Field CA2	planum polare	0.5973421247096958
1	Field CA2	planum temporale	0.5029273194108703
1	Field CA2	superior temporal gyrus	0.5500853456761916
1	Field CA2	temporal pole	0.6615850083822628
1	Field CA2	transverse gyri	0.3832040615478727
1	Field CA2	amygdala	0.386153760622231
1	Field CA2	globus pallidus	0.2570110743304016
1	Field CA2	caudate nucleus	-0.03043425418785171
1	Field CA2	nucleus accumbens	6.402842774374224e-4
1	Field CA2	putamen	-0.05769042843701684
1	Field CA2	septal nuclei	0.09497946297708536
1	Field CA2	substantia innominata	0.048537975204874746
1	Field CA2	epithalamus	0.1702354848868343
1	Field CA2	hypothalamus	0.12759547161880627
1	Field CA2	subthalamus	0.2660314883158751
1	Field CA2	thalamus	0.3258380860961602
1	Field CA2	inferior colliculus	0.22673351347123377
1	Field CA2	superior colliculus	0.26788466102581027
1	Field CA2	midbrain tegmentum	0.22242367967111015
1	Field CA2	pretectal region	0.24069060701473152
1	Field CA2	pons	0.22246314464876527
1	Field CA2	myelencephalon	0.18287854350821417
1	Field CA2	vermal I-II	0.24613977139187432
1	Field CA2	vermal III	0.2609007088569962
1	Field CA2	vermal IV	0.2716693719255048
1	Field CA2	vermal V	0.280858304589342
1	Field CA2	vermal VI	0.2647048646915033
1	Field CA2	vermal VIIAf	0.2646827785398169
1	Field CA2	vermal VIIAt	0.2680660178867336
1	Field CA2	vermal VIIB	0.2430921740067734
1	Field CA2	vermal VIIIA	0.25279041312563105
1	Field CA2	vermal VIIIB	0.24327416657532702
1	Field CA2	vermal IX	0.23663538669277398
1	Field CA2	vermal X	0.2014000193064955
1	Field CA2	III	0.30016765717454
1	Field CA2	IV	0.2834035264099024
1	Field CA2	V	0.2808305702712243
1	Field CA2	VI	0.279343768844671
1	Field CA2	crus I	0.2626057558793104
1	Field CA2	crus II	0.2579764480015404
1	Field CA2	VIIB	0.2626813208974503
1	Field CA2	VIIIA	0.2604694590089185
1	Field CA2	VIIIB	0.26462538148513187
1	Field CA2	IX	0.24732641326315374
1	Field CA2	X	0.2535132625440957
1	Field CA2	cerebellar nuclei	0.2240542109947744
1	Field CA3	claustrum	0.19575670536830114
1	Field CA3	dentate gyrus	0.7009387169727646
1	Field CA3	CA1 field	0.8195854140650819
1	Field CA3	CA2 field	0.8749638223010145
1	Field CA3	CA3 field	0.8784916100923544
1	Field CA3	CA4 field	0.9015033757575255
1	Field CA3	subiculum	0.8244620904820927
1	Field CA3	cingulate gyrus	0.33910641020165116
1	Field CA3	parahippocampal gyrus	0.5714921220526337
1	Field CA3	piriform cortex	0.613067563066434
1	Field CA3	anterior orbital gyrus	0.32303228960565344
1	Field CA3	frontal operculum	0.3006221008382798
1	Field CA3	frontal pole	0.26975726465411193
1	Field CA3	gyrus rectus	0.399140701846611
1	Field CA3	inferior frontal gyrus	0.22178063806326204
1	Field CA3	inferior rostral gyrus	0.4399086687578994
1	Field CA3	lateral orbital gyrus	0.26684666756549075
1	Field CA3	medial orbital gyrus	0.3867639386833078
1	Field CA3	middle frontal gyrus	0.25309713867803396
1	Field CA3	paracentral lobule, anterior part	0.036572119456452834
1	Field CA3	paraterminal gyrus	0.5712638187440071
1	Field CA3	parolfactory gyri	0.5225112455848574
1	Field CA3	posterior orbital gyrus	0.2957451914112918
1	Field CA3	precentral gyrus	-0.0055696944492247095
1	Field CA3	superior frontal gyrus	0.28192154512718576
1	Field CA3	superior rostral gyrus	0.3788893774783097
1	Field CA3	insula	0.38212475258093787
1	Field CA3	cuneus	-0.026466356201579864
1	Field CA3	inferior occipital gyrus	0.043243224571954376
1	Field CA3	lingual gyrus	-0.035122108178578935
1	Field CA3	occipital pole	0.021454391853827918
1	Field CA3	occipito-temporal gyrus	0.12997475295801508
1	Field CA3	superior occipital gyrus	0.06219663127740763
1	Field CA3	inferior parietal lobule	0.19104275365565912
1	Field CA3	paracentral lobule, posterior part	0.18855675809607086
1	Field CA3	postcentral gyrus	-0.00991590113733825
1	Field CA3	precuneus	0.14350848009626563
1	Field CA3	superior parietal lobule	0.07462530128132078
1	Field CA3	fusiform gyrus	0.41150004367241994
1	Field CA3	Heschl's gyrus	0.09047001953580885
1	Field CA3	inferior temporal gyrus	0.3452110821691255
1	Field CA3	middle temporal gyrus	0.2638413775372236
1	Field CA3	planum polare	0.34615483241198775
1	Field CA3	planum temporale	0.16661414946371444
1	Field CA3	superior temporal gyrus	0.2504529984367311
1	Field CA3	temporal pole	0.5071325679274417
1	Field CA3	transverse gyri	0.03900277353287687
1	Field CA3	amygdala	0.5598421463028297
1	Field CA3	globus pallidus	0.2165593322300129
1	Field CA3	caudate nucleus	-0.09720905275824639
1	Field CA3	nucleus accumbens	0.01586537393324213
1	Field CA3	putamen	-0.12484247479961433
1	Field CA3	septal nuclei	0.2772488606572672
1	Field CA3	substantia innominata	0.2301221641691223
1	Field CA3	epithalamus	0.2936814122795628
1	Field CA3	hypothalamus	0.3344492123252838
1	Field CA3	subthalamus	0.23606659980888856
1	Field CA3	thalamus	0.391669271663369
1	Field CA3	inferior colliculus	0.15479937973847582
1	Field CA3	superior colliculus	0.2699197659297238
1	Field CA3	midbrain tegmentum	0.28688714658097775
1	Field CA3	pretectal region	0.2655010184446455
1	Field CA3	pons	0.2062638666526689
1	Field CA3	myelencephalon	0.160996952044517
1	Field CA3	vermal I-II	0.2573543613457702
1	Field CA3	vermal III	0.28315419667416514
1	Field CA3	vermal IV	0.30635458786134206
1	Field CA3	vermal V	0.2999600946679004
1	Field CA3	vermal VI	0.30247148700790477
1	Field CA3	vermal VIIAf	0.2874106864619227
1	Field CA3	vermal VIIAt	0.3017531357859456
1	Field CA3	vermal VIIB	0.2693088896864882
1	Field CA3	vermal VIIIA	0.2848574037176605
1	Field CA3	vermal VIIIB	0.27736784853264684
1	Field CA3	vermal IX	0.2751443845037027
1	Field CA3	vermal X	0.2544667545243102
1	Field CA3	III	0.3171685217703102
1	Field CA3	IV	0.3077282057349564
1	Field CA3	V	0.3084817299476839
1	Field CA3	VI	0.31645714889131116
1	Field CA3	crus I	0.2941483931224151
1	Field CA3	crus II	0.28422244497692534
1	Field CA3	VIIB	0.28817935325847654
1	Field CA3	VIIIA	0.293362360898197
1	Field CA3	VIIIB	0.30244878107630835
1	Field CA3	IX	0.26103937848346315
1	Field CA3	X	0.2667124476843071
1	Field CA3	cerebellar nuclei	0.136762805387314
1	Dentate gyrus	claustrum	0.094925352804613
1	Dentate gyrus	dentate gyrus	0.6687304072091783
1	Dentate gyrus	CA1 field	0.7741983953938595
1	Dentate gyrus	CA2 field	0.7374986745948525
1	Dentate gyrus	CA3 field	0.7319554482418821
1	Dentate gyrus	CA4 field	0.7646655989431955
1	Dentate gyrus	subiculum	0.7757473639475384
1	Dentate gyrus	cingulate gyrus	0.3141330246810149
1	Dentate gyrus	parahippocampal gyrus	0.4928428009940044
1	Dentate gyrus	piriform cortex	0.5446467675812108
1	Dentate gyrus	anterior orbital gyrus	0.28805040953525357
1	Dentate gyrus	frontal operculum	0.23502636547784236
1	Dentate gyrus	frontal pole	0.25675841785380493
1	Dentate gyrus	gyrus rectus	0.33057832908278656
1	Dentate gyrus	inferior frontal gyrus	0.18199552681868109
1	Dentate gyrus	inferior rostral gyrus	0.3654289192692591
1	Dentate gyrus	lateral orbital gyrus	0.24352646609064135
1	Dentate gyrus	medial orbital gyrus	0.32609123270103657
1	Dentate gyrus	middle frontal gyrus	0.22381950766169106
1	Dentate gyrus	paracentral lobule, anterior part	0.04868430165658371
1	Dentate gyrus	paraterminal gyrus	0.6154920353651421
1	Dentate gyrus	parolfactory gyri	0.4397482895541439
1	Dentate gyrus	posterior orbital gyrus	0.2402613471107791
1	Dentate gyrus	precentral gyrus	0.013696608495543076
1	Dentate gyrus	superior frontal gyrus	0.24768155591116647
1	Dentate gyrus	superior rostral gyrus	0.3313283199278937
1	Dentate gyrus	insula	0.31127462027086245
1	Dentate gyrus	cuneus	0.016045029392594338
1	Dentate gyrus	inferior occipital gyrus	0.05439202866378495
1	Dentate gyrus	lingual gyrus	0.00845676479805247
1	Dentate gyrus	occipital pole	0.023280406479924153
1	Dentate gyrus	occipito-temporal gyrus	0.12014158019724111
1	Dentate gyrus	superior occipital gyrus	0.08600091679933283
1	Dentate gyrus	inferior parietal lobule	0.17896352846047153
1	Dentate gyrus	paracentral lobule, posterior part	0.17804723640598308
1	Dentate gyrus	postcentral gyrus	0.024240023469535098
1	Dentate gyrus	precuneus	0.15022513472838497
1	Dentate gyrus	superior parietal lobule	0.09391870986200057
1	Dentate gyrus	fusiform gyrus	0.32862197007550137
1	Dentate gyrus	Heschl's gyrus	0.09351552482308172
1	Dentate gyrus	inferior temporal gyrus	0.28392352487993383
1	Dentate gyrus	middle temporal gyrus	0.2249921986099275
1	Dentate gyrus	planum polare	0.28898772976827125
1	Dentate gyrus	planum temporale	0.1800883589889477
1	Dentate gyrus	superior temporal gyrus	0.2150520614146063
1	Dentate gyrus	temporal pole	0.40461135083749566
1	Dentate gyrus	transverse gyri	0.06250741999030479
1	Dentate gyrus	amygdala	0.5373732322062352
1	Dentate gyrus	globus pallidus	0.27754412018573804
1	Dentate gyrus	caudate nucleus	0.046504667807134886
1	Dentate gyrus	nucleus accumbens	0.1229605556655623
1	Dentate gyrus	putamen	0.03574546651283439
1	Dentate gyrus	septal nuclei	0.36856260706567767
1	Dentate gyrus	substantia innominata	0.24110469904824253
1	Dentate gyrus	epithalamus	0.3365631746844685
1	Dentate gyrus	hypothalamus	0.3039606406627483
1	Dentate gyrus	subthalamus	0.25794451003715796
1	Dentate gyrus	thalamus	0.46137171047394926
1	Dentate gyrus	inferior colliculus	0.2532571278241422
1	Dentate gyrus	superior colliculus	0.3516005257446479
1	Dentate gyrus	midbrain tegmentum	0.2743503108004041
1	Dentate gyrus	pretectal region	0.3230731302278121
1	Dentate gyrus	pons	0.1969138653733491
1	Dentate gyrus	myelencephalon	0.17089505548611786
1	Dentate gyrus	vermal I-II	0.3762614257535241
1	Dentate gyrus	vermal III	0.3954402604240088
1	Dentate gyrus	vermal IV	0.4083683019310766
1	Dentate gyrus	vermal V	0.3978828324369638
1	Dentate gyrus	vermal VI	0.3931675298434578
1	Dentate gyrus	vermal VIIAf	0.3857344293831564
1	Dentate gyrus	vermal VIIAt	0.38859012486460603
1	Dentate gyrus	vermal VIIB	0.3797295620919506
1	Dentate gyrus	vermal VIIIA	0.3819409742170354
1	Dentate gyrus	vermal VIIIB	0.389540666660276
1	Dentate gyrus	vermal IX	0.3829542406121657
1	Dentate gyrus	vermal X	0.37230328413122776
1	Dentate gyrus	III	0.4228790411653268
1	Dentate gyrus	IV	0.40129313511589126
1	Dentate gyrus	V	0.40035221000132826
1	Dentate gyrus	VI	0.4063978310081424
1	Dentate gyrus	crus I	0.38433960057670863
1	Dentate gyrus	crus II	0.37524008742913484
1	Dentate gyrus	VIIB	0.3841084987617815
1	Dentate gyrus	VIIIA	0.3817069909925576
1	Dentate gyrus	VIIIB	0.39193282430397786
1	Dentate gyrus	IX	0.348027267820715
1	Dentate gyrus	X	0.3734846538882548
1	Dentate gyrus	cerebellar nuclei	0.189362924272131
1	Anterior cingulate area	claustrum	0.5638543508111961
1	Anterior cingulate area	dentate gyrus	0.5944980249863172
1	Anterior cingulate area	CA1 field	0.5555436193992206
1	Anterior cingulate area	CA2 field	0.3417247674469148
1	Anterior cingulate area	CA3 field	0.30001891631625804
1	Anterior cingulate area	CA4 field	0.13718503771931723
1	Anterior cingulate area	subiculum	0.508412569496954
1	Anterior cingulate area	cingulate gyrus	0.8832941021459618
1	Anterior cingulate area	parahippocampal gyrus	0.6866862150853067
1	Anterior cingulate area	piriform cortex	0.19364256039502353
1	Anterior cingulate area	anterior orbital gyrus	0.8735571827583375
1	Anterior cingulate area	frontal operculum	0.8351662707542322
1	Anterior cingulate area	frontal pole	0.8669046771542462
1	Anterior cingulate area	gyrus rectus	0.8084051493246152
1	Anterior cingulate area	inferior frontal gyrus	0.8764072620450366
1	Anterior cingulate area	inferior rostral gyrus	0.8067887612338046
1	Anterior cingulate area	lateral orbital gyrus	0.8731650382536945
1	Anterior cingulate area	medial orbital gyrus	0.8387448710909051
1	Anterior cingulate area	middle frontal gyrus	0.90253931995227
1	Anterior cingulate area	paracentral lobule, anterior part	0.855817114928969
1	Anterior cingulate area	paraterminal gyrus	0.5208116900756663
1	Anterior cingulate area	parolfactory gyri	0.6616701793724935
1	Anterior cingulate area	posterior orbital gyrus	0.8304000135198274
1	Anterior cingulate area	precentral gyrus	0.8245537552156493
1	Anterior cingulate area	superior frontal gyrus	0.8961979257763828
1	Anterior cingulate area	superior rostral gyrus	0.8542088898651823
1	Anterior cingulate area	insula	0.7966368127817053
1	Anterior cingulate area	cuneus	0.7180999181968958
1	Anterior cingulate area	inferior occipital gyrus	0.8208117541539514
1	Anterior cingulate area	lingual gyrus	0.7125616784842694
1	Anterior cingulate area	occipital pole	0.7678652489654341
1	Anterior cingulate area	occipito-temporal gyrus	0.8543665333787545
1	Anterior cingulate area	superior occipital gyrus	0.8468756273604466
1	Anterior cingulate area	inferior parietal lobule	0.8909860005708534
1	Anterior cingulate area	paracentral lobule, posterior part	0.8803615954110303
1	Anterior cingulate area	postcentral gyrus	0.7987183611301106
1	Anterior cingulate area	precuneus	0.8873153448038336
1	Anterior cingulate area	superior parietal lobule	0.8573156712177697
1	Anterior cingulate area	fusiform gyrus	0.7938051541367048
1	Anterior cingulate area	Heschl's gyrus	0.8283184789211356
1	Anterior cingulate area	inferior temporal gyrus	0.8396702969410914
1	Anterior cingulate area	middle temporal gyrus	0.8612465511661448
1	Anterior cingulate area	planum polare	0.8248007766671382
1	Anterior cingulate area	planum temporale	0.871432772441434
1	Anterior cingulate area	superior temporal gyrus	0.8805322831508465
1	Anterior cingulate area	temporal pole	0.6937406101649853
1	Anterior cingulate area	transverse gyri	0.8127397380057212
1	Anterior cingulate area	amygdala	0.08149091774576879
1	Anterior cingulate area	globus pallidus	0.15155606809824393
1	Anterior cingulate area	caudate nucleus	0.23260220239977594
1	Anterior cingulate area	nucleus accumbens	0.16815663006847956
1	Anterior cingulate area	putamen	0.2153877324863408
1	Anterior cingulate area	septal nuclei	-0.017372719968914874
1	Anterior cingulate area	substantia innominata	-0.03248102377081915
1	Anterior cingulate area	epithalamus	-3.911939868474788e-4
1	Anterior cingulate area	hypothalamus	-0.05535713859959186
1	Anterior cingulate area	subthalamus	0.15490039947886847
1	Anterior cingulate area	thalamus	0.07743547718889772
1	Anterior cingulate area	inferior colliculus	0.2318214757987824
1	Anterior cingulate area	superior colliculus	0.17648041398661835
1	Anterior cingulate area	midbrain tegmentum	0.06297707737992969
1	Anterior cingulate area	pretectal region	0.12153668162072852
1	Anterior cingulate area	pons	0.13298234242121754
1	Anterior cingulate area	myelencephalon	0.12981063418109895
1	Anterior cingulate area	vermal I-II	0.11028468413728867
1	Anterior cingulate area	vermal III	0.08031192477374763
1	Anterior cingulate area	vermal IV	0.06554391376386808
1	Anterior cingulate area	vermal V	0.08047490231245681
1	Anterior cingulate area	vermal VI	0.05506756298653899
1	Anterior cingulate area	vermal VIIAf	0.0664125951612039
1	Anterior cingulate area	vermal VIIAt	0.04569679101083473
1	Anterior cingulate area	vermal VIIB	0.07141581838412561
1	Anterior cingulate area	vermal VIIIA	0.059297562083795496
1	Anterior cingulate area	vermal VIIIB	0.07551134777421652
1	Anterior cingulate area	vermal IX	0.07225158996966932
1	Anterior cingulate area	vermal X	0.07354157342502896
1	Anterior cingulate area	III	0.09220567196399683
1	Anterior cingulate area	IV	0.06445164789694875
1	Anterior cingulate area	V	0.06152796903592464
1	Anterior cingulate area	VI	0.05262469364908559
1	Anterior cingulate area	crus I	0.05031559436542378
1	Anterior cingulate area	crus II	0.05843562006041584
1	Anterior cingulate area	VIIB	0.06610017032185309
1	Anterior cingulate area	VIIIA	0.04731561473372754
1	Anterior cingulate area	VIIIB	0.04959334923259023
1	Anterior cingulate area	IX	0.05586320059741554
1	Anterior cingulate area	X	0.09212523028603839
1	Anterior cingulate area	cerebellar nuclei	0.19721279765607747
1	Infralimbic area	claustrum	0.48650367982802345
1	Infralimbic area	dentate gyrus	0.8369031714118408
1	Infralimbic area	CA1 field	0.7811214984376642
1	Infralimbic area	CA2 field	0.7408367381419236
1	Infralimbic area	CA3 field	0.7361986112304114
1	Infralimbic area	CA4 field	0.65512385849866
1	Infralimbic area	subiculum	0.804832733061616
1	Infralimbic area	cingulate gyrus	0.5756480221959537
1	Infralimbic area	parahippocampal gyrus	0.6893522603093508
1	Infralimbic area	piriform cortex	0.7261447107937019
1	Infralimbic area	anterior orbital gyrus	0.5716531968595423
1	Infralimbic area	frontal operculum	0.5439069695700721
1	Infralimbic area	frontal pole	0.46107847084658615
1	Infralimbic area	gyrus rectus	0.6155702667954526
1	Infralimbic area	inferior frontal gyrus	0.45777463381026134
1	Infralimbic area	inferior rostral gyrus	0.6317738581476301
1	Infralimbic area	lateral orbital gyrus	0.48650612255198195
1	Infralimbic area	medial orbital gyrus	0.6140179784861465
1	Infralimbic area	middle frontal gyrus	0.48074572125898624
1	Infralimbic area	paracentral lobule, anterior part	0.28284064278561827
1	Infralimbic area	paraterminal gyrus	0.8194750075469854
1	Infralimbic area	parolfactory gyri	0.7743473375619425
1	Infralimbic area	posterior orbital gyrus	0.534520817957779
1	Infralimbic area	precentral gyrus	0.2076863892254712
1	Infralimbic area	superior frontal gyrus	0.51141447528515
1	Infralimbic area	superior rostral gyrus	0.6195986637560523
1	Infralimbic area	insula	0.6016092487009124
1	Infralimbic area	cuneus	0.10411827281195501
1	Infralimbic area	inferior occipital gyrus	0.23199530123295506
1	Infralimbic area	lingual gyrus	0.09125302215865938
1	Infralimbic area	occipital pole	0.17298523892737364
1	Infralimbic area	occipito-temporal gyrus	0.3302935463876914
1	Infralimbic area	superior occipital gyrus	0.26738221255529127
1	Infralimbic area	inferior parietal lobule	0.4058143805884743
1	Infralimbic area	paracentral lobule, posterior part	0.3720806664606233
1	Infralimbic area	postcentral gyrus	0.1796743942326525
1	Infralimbic area	precuneus	0.35579660867862706
1	Infralimbic area	superior parietal lobule	0.2694595763149698
1	Infralimbic area	fusiform gyrus	0.603203206106271
1	Infralimbic area	Heschl's gyrus	0.2832929917463895
1	Infralimbic area	inferior temporal gyrus	0.5448148597290133
1	Infralimbic area	middle temporal gyrus	0.4731909398988647
1	Infralimbic area	planum polare	0.5801674390722676
1	Infralimbic area	planum temporale	0.34980638813275355
1	Infralimbic area	superior temporal gyrus	0.48332227036526876
1	Infralimbic area	temporal pole	0.677953439488778
1	Infralimbic area	transverse gyri	0.2377998934718033
1	Infralimbic area	amygdala	0.7050962604937719
1	Infralimbic area	globus pallidus	0.19749689414467642
1	Infralimbic area	caudate nucleus	0.4227238422536971
1	Infralimbic area	nucleus accumbens	0.5333925412162663
1	Infralimbic area	putamen	0.39834785196523376
1	Infralimbic area	septal nuclei	0.5664035851839405
1	Infralimbic area	substantia innominata	0.4906307636962856
1	Infralimbic area	epithalamus	0.34996068350939646
1	Infralimbic area	hypothalamus	0.428286718142949
1	Infralimbic area	subthalamus	0.16796162976292295
1	Infralimbic area	thalamus	0.2570586684673286
1	Infralimbic area	inferior colliculus	0.2052170616007462
1	Infralimbic area	superior colliculus	0.29079353231219957
1	Infralimbic area	midbrain tegmentum	0.26455339257509647
1	Infralimbic area	pretectal region	0.278009857699635
1	Infralimbic area	pons	0.16236432527973096
1	Infralimbic area	myelencephalon	0.15729925741493073
1	Infralimbic area	vermal I-II	0.19873745393601835
1	Infralimbic area	vermal III	0.15590228229413772
1	Infralimbic area	vermal IV	0.15686777084292874
1	Infralimbic area	vermal V	0.13144464281763388
1	Infralimbic area	vermal VI	0.1561842865269087
1	Infralimbic area	vermal VIIAf	0.12675087191536005
1	Infralimbic area	vermal VIIAt	0.12590265814371515
1	Infralimbic area	vermal VIIB	0.15416285358522933
1	Infralimbic area	vermal VIIIA	0.14524115359949316
1	Infralimbic area	vermal VIIIB	0.18224655214798544
1	Infralimbic area	vermal IX	0.1849187749302413
1	Infralimbic area	vermal X	0.2541571883212758
1	Infralimbic area	III	0.1575369290478578
1	Infralimbic area	IV	0.1312875589817895
1	Infralimbic area	V	0.13331093301729552
1	Infralimbic area	VI	0.14393782391874257
1	Infralimbic area	crus I	0.1322207181888987
1	Infralimbic area	crus II	0.12931490586127395
1	Infralimbic area	VIIB	0.13980254616785326
1	Infralimbic area	VIIIA	0.13016036810990106
1	Infralimbic area	VIIIB	0.15122683439593576
1	Infralimbic area	IX	0.0986582601806597
1	Infralimbic area	X	0.15341995654286597
1	Infralimbic area	cerebellar nuclei	0.11621686353227917
1	Retrosplenial area	claustrum	0.17704896851460328
1	Retrosplenial area	dentate gyrus	0.3307402242450097
1	Retrosplenial area	CA1 field	0.3832680170531798
1	Retrosplenial area	CA2 field	0.13970399002660733
1	Retrosplenial area	CA3 field	0.0984122896533546
1	Retrosplenial area	CA4 field	-0.002897482859813387
1	Retrosplenial area	subiculum	0.36232180717256746
1	Retrosplenial area	cingulate gyrus	0.6502643996867842
1	Retrosplenial area	parahippocampal gyrus	0.40935369499002944
1	Retrosplenial area	piriform cortex	-0.05446967505947366
1	Retrosplenial area	anterior orbital gyrus	0.6243925269714602
1	Retrosplenial area	frontal operculum	0.547844462696539
1	Retrosplenial area	frontal pole	0.6917543129377667
1	Retrosplenial area	gyrus rectus	0.508413403693845
1	Retrosplenial area	inferior frontal gyrus	0.660403784637777
1	Retrosplenial area	inferior rostral gyrus	0.5159116319974094
1	Retrosplenial area	lateral orbital gyrus	0.6742924453548336
1	Retrosplenial area	medial orbital gyrus	0.5542079917678236
1	Retrosplenial area	middle frontal gyrus	0.7081589701075903
1	Retrosplenial area	paracentral lobule, anterior part	0.7484117662622514
1	Retrosplenial area	paraterminal gyrus	0.3391074229130385
1	Retrosplenial area	parolfactory gyri	0.3116214549587027
1	Retrosplenial area	posterior orbital gyrus	0.5559105639616779
1	Retrosplenial area	precentral gyrus	0.7591292873006683
1	Retrosplenial area	superior frontal gyrus	0.6796592397342088
1	Retrosplenial area	superior rostral gyrus	0.581312659058493
1	Retrosplenial area	insula	0.49283836947884613
1	Retrosplenial area	cuneus	0.750132255269393
1	Retrosplenial area	inferior occipital gyrus	0.7470848632290943
1	Retrosplenial area	lingual gyrus	0.74562021058184
1	Retrosplenial area	occipital pole	0.7248000474953601
1	Retrosplenial area	occipito-temporal gyrus	0.721310862758322
1	Retrosplenial area	superior occipital gyrus	0.782051591982195
1	Retrosplenial area	inferior parietal lobule	0.7343984762516429
1	Retrosplenial area	paracentral lobule, posterior part	0.7753250298651575
1	Retrosplenial area	postcentral gyrus	0.7658456426993644
1	Retrosplenial area	precuneus	0.7723398990000188
1	Retrosplenial area	superior parietal lobule	0.7865254750182883
1	Retrosplenial area	fusiform gyrus	0.4888052115108073
1	Retrosplenial area	Heschl's gyrus	0.7204310721688757
1	Retrosplenial area	inferior temporal gyrus	0.5781733213544943
1	Retrosplenial area	middle temporal gyrus	0.6407795972851211
1	Retrosplenial area	planum polare	0.53472718562445
1	Retrosplenial area	planum temporale	0.7751064957628417
1	Retrosplenial area	superior temporal gyrus	0.6608513938059316
1	Retrosplenial area	temporal pole	0.3481339691226522
1	Retrosplenial area	transverse gyri	0.7389112520607866
1	Retrosplenial area	amygdala	-0.0821913747049421
1	Retrosplenial area	globus pallidus	0.131787887686481
1	Retrosplenial area	caudate nucleus	0.09175816200955562
1	Retrosplenial area	nucleus accumbens	-0.003216348829785601
1	Retrosplenial area	putamen	0.09144861019606902
1	Retrosplenial area	septal nuclei	-0.08396394515618061
1	Retrosplenial area	substantia innominata	-0.1555225715032296
1	Retrosplenial area	epithalamus	-0.030388694188891462
1	Retrosplenial area	hypothalamus	-0.1228156578180311
1	Retrosplenial area	subthalamus	0.15127163636003566
1	Retrosplenial area	thalamus	0.10165745192510696
1	Retrosplenial area	inferior colliculus	0.2783647268330435
1	Retrosplenial area	superior colliculus	0.20192681973119195
1	Retrosplenial area	midbrain tegmentum	0.027025389060311364
1	Retrosplenial area	pretectal region	0.11987101089310864
1	Retrosplenial area	pons	0.11782240135473912
1	Retrosplenial area	myelencephalon	0.11682451698599479
1	Retrosplenial area	vermal I-II	0.19942124862313035
1	Retrosplenial area	vermal III	0.19924938808839285
1	Retrosplenial area	vermal IV	0.1819045659598566
1	Retrosplenial area	vermal V	0.20083140364294044
1	Retrosplenial area	vermal VI	0.1594719171306518
1	Retrosplenial area	vermal VIIAf	0.18964602406450679
1	Retrosplenial area	vermal VIIAt	0.15433969472818668
1	Retrosplenial area	vermal VIIB	0.17832854032432624
1	Retrosplenial area	vermal VIIIA	0.16835185255646617
1	Retrosplenial area	vermal VIIIB	0.1779722742454111
1	Retrosplenial area	vermal IX	0.16429932176248732
1	Retrosplenial area	vermal X	0.14073464140735714
1	Retrosplenial area	III	0.2099187245688677
1	Retrosplenial area	IV	0.17872673605123712
1	Retrosplenial area	V	0.1751714677572141
1	Retrosplenial area	VI	0.16303016078724133
1	Retrosplenial area	crus I	0.1580525667361662
1	Retrosplenial area	crus II	0.16236248407393863
1	Retrosplenial area	VIIB	0.17178439684251995
1	Retrosplenial area	VIIIA	0.1511565815224555
1	Retrosplenial area	VIIIB	0.14540903429112823
1	Retrosplenial area	IX	0.15897362870636197
1	Retrosplenial area	X	0.19432778114851013
1	Retrosplenial area	cerebellar nuclei	0.20714022847006325
1	Prelimbic area	claustrum	0.7313977158621802
1	Prelimbic area	dentate gyrus	0.7065044115979454
1	Prelimbic area	CA1 field	0.6465050301944637
1	Prelimbic area	CA2 field	0.4551120219923296
1	Prelimbic area	CA3 field	0.407432745898884
1	Prelimbic area	CA4 field	0.2576909046265671
1	Prelimbic area	subiculum	0.5959213064286185
1	Prelimbic area	cingulate gyrus	0.8865303712350776
1	Prelimbic area	parahippocampal gyrus	0.8031291103881837
1	Prelimbic area	piriform cortex	0.4231742726954025
1	Prelimbic area	anterior orbital gyrus	0.8809598135439368
1	Prelimbic area	frontal operculum	0.8563371961777123
1	Prelimbic area	frontal pole	0.8578849021143701
1	Prelimbic area	gyrus rectus	0.8757393116863852
1	Prelimbic area	inferior frontal gyrus	0.8183742971948303
1	Prelimbic area	inferior rostral gyrus	0.8743932118609126
1	Prelimbic area	lateral orbital gyrus	0.8409613689065695
1	Prelimbic area	medial orbital gyrus	0.883181772939082
1	Prelimbic area	middle frontal gyrus	0.840224626910936
1	Prelimbic area	paracentral lobule, anterior part	0.6932576843317264
1	Prelimbic area	paraterminal gyrus	0.6348414228229625
1	Prelimbic area	parolfactory gyri	0.7959458938609105
1	Prelimbic area	posterior orbital gyrus	0.8600711991468828
1	Prelimbic area	precentral gyrus	0.6416268926668002
1	Prelimbic area	superior frontal gyrus	0.8609639232863641
1	Prelimbic area	superior rostral gyrus	0.8852522076272457
1	Prelimbic area	insula	0.8535493165951528
1	Prelimbic area	cuneus	0.4803722611950459
1	Prelimbic area	inferior occipital gyrus	0.6530684100030278
1	Prelimbic area	lingual gyrus	0.4892727585830729
1	Prelimbic area	occipital pole	0.5510064227271203
1	Prelimbic area	occipito-temporal gyrus	0.7353251271555018
1	Prelimbic area	superior occipital gyrus	0.6707242325143095
1	Prelimbic area	inferior parietal lobule	0.795149464304963
1	Prelimbic area	paracentral lobule, posterior part	0.7492984068083419
1	Prelimbic area	postcentral gyrus	0.5909443762225095
1	Prelimbic area	precuneus	0.768955482678464
1	Prelimbic area	superior parietal lobule	0.701784572738283
1	Prelimbic area	fusiform gyrus	0.8463848847437093
1	Prelimbic area	Heschl's gyrus	0.6925468283504175
1	Prelimbic area	inferior temporal gyrus	0.8570250346344038
1	Prelimbic area	middle temporal gyrus	0.8344476310509934
1	Prelimbic area	planum polare	0.8472349068125631
1	Prelimbic area	planum temporale	0.7596629293830238
1	Prelimbic area	superior temporal gyrus	0.836451160773981
1	Prelimbic area	temporal pole	0.8166573443538393
1	Prelimbic area	transverse gyri	0.6611360576603268
1	Prelimbic area	amygdala	0.24833535113712754
1	Prelimbic area	globus pallidus	0.21725808826568282
1	Prelimbic area	caudate nucleus	0.2341425153602212
1	Prelimbic area	nucleus accumbens	0.21360847342167988
1	Prelimbic area	putamen	0.21988630353244235
1	Prelimbic area	septal nuclei	0.06402777971196058
1	Prelimbic area	substantia innominata	0.022596374840358233
1	Prelimbic area	epithalamus	0.11930657234087835
1	Prelimbic area	hypothalamus	0.007933442846367765
1	Prelimbic area	subthalamus	0.1875773654315632
1	Prelimbic area	thalamus	0.1562765004471567
1	Prelimbic area	inferior colliculus	0.2516044949697666
1	Prelimbic area	superior colliculus	0.20589538196008433
1	Prelimbic area	midbrain tegmentum	0.12121611815652696
1	Prelimbic area	pretectal region	0.18170567275225938
1	Prelimbic area	pons	0.16802112663010796
1	Prelimbic area	myelencephalon	0.18175035924033328
1	Prelimbic area	vermal I-II	0.23778981590724965
1	Prelimbic area	vermal III	0.22339951645334144
1	Prelimbic area	vermal IV	0.2141928391620834
1	Prelimbic area	vermal V	0.22118176408580736
1	Prelimbic area	vermal VI	0.21100644717844824
1	Prelimbic area	vermal VIIAf	0.21440738576723545
1	Prelimbic area	vermal VIIAt	0.20269392960436688
1	Prelimbic area	vermal VIIB	0.21774547051814622
1	Prelimbic area	vermal VIIIA	0.2172503804329319
1	Prelimbic area	vermal VIIIB	0.2286696792414944
1	Prelimbic area	vermal IX	0.22822202618702553
1	Prelimbic area	vermal X	0.2233551880314373
1	Prelimbic area	III	0.22554268239521638
1	Prelimbic area	IV	0.2103835726578044
1	Prelimbic area	V	0.20995484995845598
1	Prelimbic area	VI	0.20646605579715382
1	Prelimbic area	crus I	0.20685932764927484
1	Prelimbic area	crus II	0.21313230686856957
1	Prelimbic area	VIIB	0.21871543509339456
1	Prelimbic area	VIIIA	0.2055138526798044
1	Prelimbic area	VIIIB	0.20845349731551732
1	Prelimbic area	IX	0.2085466205482187
1	Prelimbic area	X	0.2377088400942971
1	Prelimbic area	cerebellar nuclei	0.22813025827019343
1	Primary auditory area	claustrum	0.6227187065027435
1	Primary auditory area	dentate gyrus	0.40445901602824436
1	Primary auditory area	CA1 field	0.3586310607776573
1	Primary auditory area	CA2 field	0.13623321483070175
1	Primary auditory area	CA3 field	0.0956349247198959
1	Primary auditory area	CA4 field	0.014731228578055857
1	Primary auditory area	subiculum	0.21784342111267568
1	Primary auditory area	cingulate gyrus	0.7902326295822003
1	Primary auditory area	parahippocampal gyrus	0.6268435850589584
1	Primary auditory area	piriform cortex	0.12353051770619683
1	Primary auditory area	anterior orbital gyrus	0.7917521078722196
1	Primary auditory area	frontal operculum	0.7749218402014025
1	Primary auditory area	frontal pole	0.8746842686722999
1	Primary auditory area	gyrus rectus	0.7363399132355567
1	Primary auditory area	inferior frontal gyrus	0.8269405033229363
1	Primary auditory area	inferior rostral gyrus	0.7249177669896685
1	Primary auditory area	lateral orbital gyrus	0.8560629896705639
1	Primary auditory area	medial orbital gyrus	0.7477115790174853
1	Primary auditory area	middle frontal gyrus	0.8148873573042442
1	Primary auditory area	paracentral lobule, anterior part	0.7818055568150336
1	Primary auditory area	paraterminal gyrus	0.3441387459451582
1	Primary auditory area	parolfactory gyri	0.4742459083876059
1	Primary auditory area	posterior orbital gyrus	0.7921044065034105
1	Primary auditory area	precentral gyrus	0.7769273533704939
1	Primary auditory area	superior frontal gyrus	0.8057491221450982
1	Primary auditory area	superior rostral gyrus	0.751933942972289
1	Primary auditory area	insula	0.746653183661869
1	Primary auditory area	cuneus	0.8158259842109611
1	Primary auditory area	inferior occipital gyrus	0.8545369005804151
1	Primary auditory area	lingual gyrus	0.8440796179593983
1	Primary auditory area	occipital pole	0.8557749664730602
1	Primary auditory area	occipito-temporal gyrus	0.874665898490294
1	Primary auditory area	superior occipital gyrus	0.8401041861595823
1	Primary auditory area	inferior parietal lobule	0.850602650944444
1	Primary auditory area	paracentral lobule, posterior part	0.8334442168626738
1	Primary auditory area	postcentral gyrus	0.7968194270965695
1	Primary auditory area	precuneus	0.86242340462795275
1	Primary auditory area	superior parietal lobule	0.8511825194920455
1	Primary auditory area	fusiform gyrus	0.7307162765466033
1	Primary auditory area	Heschl's gyrus	0.8827248490325255
1	Primary auditory area	inferior temporal gyrus	0.7995313407161815
1	Primary auditory area	middle temporal gyrus	0.8402284920801141
1	Primary auditory area	planum polare	0.756961968217729
1	Primary auditory area	planum temporale	0.8926828739970497
1	Primary auditory area	superior temporal gyrus	0.8217012589183171
1	Primary auditory area	temporal pole	0.605367787255839
1	Primary auditory area	transverse gyri	0.8819806548489577
1	Primary auditory area	amygdala	-0.02306611645364286
1	Primary auditory area	globus pallidus	0.1250713659585993
1	Primary auditory area	caudate nucleus	0.16823580554551748
1	Primary auditory area	nucleus accumbens	0.046687197067728066
1	Primary auditory area	putamen	0.14642258162402166
1	Primary auditory area	septal nuclei	-0.24054158953037075
1	Primary auditory area	substantia innominata	-0.22807964900650776
1	Primary auditory area	epithalamus	-0.12061202476929014
1	Primary auditory area	hypothalamus	-0.23433494146044728
1	Primary auditory area	subthalamus	0.10266191828260227
1	Primary auditory area	thalamus	0.0014420285524638188
1	Primary auditory area	inferior colliculus	0.13188139438868324
1	Primary auditory area	superior colliculus	0.030865450692927687
1	Primary auditory area	midbrain tegmentum	-0.029716757106191146
1	Primary auditory area	pretectal region	0.015097319024785881
1	Primary auditory area	pons	0.08153694688024418
[truncated: 980,667 more rows]
