# Supplementary material for: Whole-brain comparison of rodent and human brains using spatial transcriptomics
Source: eLife. 2022 Nov 7;11:e79418. doi: 10.7554/eLife.79418 (PMC9708081; doi:10.7554/eLife.79418)
Supplement: Figure 2—source data 2. [file elife-79418-fig2-data2.csv]

LatentSpaceID	MouseRegion	HumanRegion	Correlation
167	Inferior colliculus	inferior colliculus	0.6331091316583513
167	Inferior colliculus	superior colliculus	0.5914259606920405
167	Inferior colliculus	midbrain tegmentum	0.3917054349571426
167	Inferior colliculus	pretectal region	0.48140458800231956
167	Inferior colliculus	pons	0.4503192717279702
167	Inferior colliculus	myelencephalon	0.4031973663975142
167	Inferior colliculus	vermal I-II	0.33071214213057687
167	Inferior colliculus	vermal III	0.18439072385997257
167	Inferior colliculus	vermal IV	0.13215704582050528
167	Inferior colliculus	vermal V	0.13111960324786232
167	Inferior colliculus	vermal VI	0.09809134882887745
167	Inferior colliculus	vermal VIIAf	0.08676105002670825
167	Inferior colliculus	vermal VIIAt	0.08578115910592407
167	Inferior colliculus	vermal VIIB	0.1383816031779612
167	Inferior colliculus	vermal VIIIA	0.09978346815053753
167	Inferior colliculus	vermal VIIIB	0.17823173026528888
167	Inferior colliculus	vermal IX	0.13957398400421692
167	Inferior colliculus	vermal X	0.3300799306452956
167	Inferior colliculus	III	0.2374340853458081
167	Inferior colliculus	IV	0.15185972713004856
167	Inferior colliculus	V	0.121857177167109
167	Inferior colliculus	VI	0.09677531938070041
167	Inferior colliculus	crus I	0.08828626448809902
167	Inferior colliculus	crus II	0.0686619862255603
167	Inferior colliculus	VIIB	0.09723146815162022
167	Inferior colliculus	VIIIA	0.06277089927232411
167	Inferior colliculus	VIIIB	0.07299620263547033
167	Inferior colliculus	IX	0.05778764018231674
167	Inferior colliculus	X	0.19507136535058314
167	Inferior colliculus	cerebellar nuclei	0.4894467287682045
167	Superior colliculus, sensory related	claustrum	-0.0017565325925059396
167	Superior colliculus, sensory related	dentate gyrus	0.0011568588371993883
167	Superior colliculus, sensory related	CA1 field	0.05096920807101863
167	Superior colliculus, sensory related	CA2 field	-0.07705319396393823
167	Superior colliculus, sensory related	CA3 field	-0.05959532366095271
167	Superior colliculus, sensory related	CA4 field	-0.10064830837795215
167	Superior colliculus, sensory related	subiculum	0.14204897229620908
167	Superior colliculus, sensory related	cingulate gyrus	0.13596970670993036
167	Superior colliculus, sensory related	parahippocampal gyrus	0.006834933926801387
167	Superior colliculus, sensory related	piriform cortex	-0.0024969694822339085
167	Superior colliculus, sensory related	anterior orbital gyrus	0.1668446095346296
167	Superior colliculus, sensory related	frontal operculum	0.07998019596427192
167	Superior colliculus, sensory related	frontal pole	0.22411266420107215
167	Superior colliculus, sensory related	gyrus rectus	0.06509928583787372
167	Superior colliculus, sensory related	inferior frontal gyrus	0.20944747684644618
167	Superior colliculus, sensory related	inferior rostral gyrus	0.04792316111558664
167	Superior colliculus, sensory related	lateral orbital gyrus	0.18980069263475785
167	Superior colliculus, sensory related	medial orbital gyrus	0.10259836838488703
167	Superior colliculus, sensory related	middle frontal gyrus	0.2546622472198073
167	Superior colliculus, sensory related	paracentral lobule, anterior part	0.34347614635466417
167	Superior colliculus, sensory related	paraterminal gyrus	0.21742754746230633
167	Superior colliculus, sensory related	parolfactory gyri	0.0055725052398507315
167	Superior colliculus, sensory related	posterior orbital gyrus	0.1180232902365165
167	Superior colliculus, sensory related	precentral gyrus	0.38309178025873597
167	Superior colliculus, sensory related	superior frontal gyrus	0.20650158558021145
167	Superior colliculus, sensory related	superior rostral gyrus	0.12379988255232861
167	Superior colliculus, sensory related	insula	0.022172521039247807
167	Superior colliculus, sensory related	cuneus	0.3858164516780768
167	Superior colliculus, sensory related	inferior occipital gyrus	0.33674224645078404
167	Superior colliculus, sensory related	lingual gyrus	0.36090185378065187
167	Superior colliculus, sensory related	occipital pole	0.30763877676618606
167	Superior colliculus, sensory related	occipito-temporal gyrus	0.2704596363865631
167	Superior colliculus, sensory related	superior occipital gyrus	0.3694354425005164
167	Superior colliculus, sensory related	inferior parietal lobule	0.25261968529850853
167	Superior colliculus, sensory related	paracentral lobule, posterior part	0.30570027895912805
167	Superior colliculus, sensory related	postcentral gyrus	0.37074932107066355
167	Superior colliculus, sensory related	precuneus	0.2975339183340496
167	Superior colliculus, sensory related	superior parietal lobule	0.34827630558302203
167	Superior colliculus, sensory related	fusiform gyrus	0.02472234532978006
167	Superior colliculus, sensory related	Heschl's gyrus	0.2995878122005145
167	Superior colliculus, sensory related	inferior temporal gyrus	0.08953340638497505
167	Superior colliculus, sensory related	middle temporal gyrus	0.14722972535656625
167	Superior colliculus, sensory related	planum polare	0.07135013450379087
167	Superior colliculus, sensory related	planum temporale	0.3008729826228178
167	Superior colliculus, sensory related	superior temporal gyrus	0.18428115617308172
167	Superior colliculus, sensory related	temporal pole	-0.048620166501028746
167	Superior colliculus, sensory related	transverse gyri	0.3016366211327698
167	Superior colliculus, sensory related	amygdala	0.12820270866435404
167	Superior colliculus, sensory related	globus pallidus	0.2743598633634375
167	Superior colliculus, sensory related	caudate nucleus	0.2203553821707559
167	Superior colliculus, sensory related	nucleus accumbens	0.20806486660127974
167	Superior colliculus, sensory related	putamen	0.2418218392265572
167	Superior colliculus, sensory related	septal nuclei	0.35404229047782104
167	Superior colliculus, sensory related	substantia innominata	0.3311250280313171
167	Superior colliculus, sensory related	epithalamus	0.2974491246996862
167	Superior colliculus, sensory related	hypothalamus	0.4002163398945331
167	Superior colliculus, sensory related	subthalamus	0.3721287159840564
167	Superior colliculus, sensory related	thalamus	0.48250847224180893
167	Superior colliculus, sensory related	inferior colliculus	0.4937625236179196
167	Superior colliculus, sensory related	superior colliculus	0.5579997438736618
167	Superior colliculus, sensory related	midbrain tegmentum	0.37920476545303433
167	Superior colliculus, sensory related	pretectal region	0.44060648279299586
167	Superior colliculus, sensory related	pons	0.3581565830840529
167	Superior colliculus, sensory related	myelencephalon	0.29291262435322674
167	Superior colliculus, sensory related	vermal I-II	0.1613763493027981
167	Superior colliculus, sensory related	vermal III	0.03223057612044557
167	Superior colliculus, sensory related	vermal IV	-0.014737893623161125
167	Superior colliculus, sensory related	vermal V	-0.02968533638102976
167	Superior colliculus, sensory related	vermal VI	-0.0477369322885592
167	Superior colliculus, sensory related	vermal VIIAf	-0.058628720055469256
167	Superior colliculus, sensory related	vermal VIIAt	-0.05654064237567871
167	Superior colliculus, sensory related	vermal VIIB	-0.012379054136015463
167	Superior colliculus, sensory related	vermal VIIIA	-0.04321915404296928
167	Superior colliculus, sensory related	vermal VIIIB	0.039288327081700845
167	Superior colliculus, sensory related	vermal IX	-6.702231090867764e-4
167	Superior colliculus, sensory related	vermal X	0.22521512959694723
167	Superior colliculus, sensory related	III	0.059336964754470325
167	Superior colliculus, sensory related	IV	-0.018204270323348135
167	Superior colliculus, sensory related	V	-0.0385871054078403
167	Superior colliculus, sensory related	VI	-0.053120920001871255
167	Superior colliculus, sensory related	crus I	-0.055310970721248486
167	Superior colliculus, sensory related	crus II	-0.08356884592680863
167	Superior colliculus, sensory related	VIIB	-0.05408788659219011
167	Superior colliculus, sensory related	VIIIA	-0.08058921023651265
167	Superior colliculus, sensory related	VIIIB	-0.07817529771736088
167	Superior colliculus, sensory related	IX	-0.1108006902112504
167	Superior colliculus, sensory related	X	0.03869099536621836
167	Superior colliculus, sensory related	cerebellar nuclei	0.3257334427815067
167	Midbrain raphe nuclei	claustrum	0.053127861683907755
167	Midbrain raphe nuclei	dentate gyrus	0.2989372492459015
167	Midbrain raphe nuclei	CA1 field	0.3924659057210311
167	Midbrain raphe nuclei	CA2 field	0.37025015038649794
167	Midbrain raphe nuclei	CA3 field	0.3939599132067453
167	Midbrain raphe nuclei	CA4 field	0.42529196451367196
167	Midbrain raphe nuclei	subiculum	0.47805868586037076
167	Midbrain raphe nuclei	cingulate gyrus	0.02313159909643817
167	Midbrain raphe nuclei	parahippocampal gyrus	0.20837568432928677
167	Midbrain raphe nuclei	piriform cortex	0.4118862623188021
167	Midbrain raphe nuclei	anterior orbital gyrus	0.006234812524277308
167	Midbrain raphe nuclei	frontal operculum	-0.05487339418136919
167	Midbrain raphe nuclei	frontal pole	-0.008794496204830377
167	Midbrain raphe nuclei	gyrus rectus	0.028403399805561193
167	Midbrain raphe nuclei	inferior frontal gyrus	-0.09314174901833712
167	Midbrain raphe nuclei	inferior rostral gyrus	0.03867945933066876
167	Midbrain raphe nuclei	lateral orbital gyrus	-0.0363740468151835
167	Midbrain raphe nuclei	medial orbital gyrus	0.01418571276396925
167	Midbrain raphe nuclei	middle frontal gyrus	-0.068413360476411
167	Midbrain raphe nuclei	paracentral lobule, anterior part	-0.13440525243469512
167	Midbrain raphe nuclei	paraterminal gyrus	0.4804042474789682
167	Midbrain raphe nuclei	parolfactory gyri	0.18517676501650066
167	Midbrain raphe nuclei	posterior orbital gyrus	-0.032401681205257334
167	Midbrain raphe nuclei	precentral gyrus	-0.1168183636809456
167	Midbrain raphe nuclei	superior frontal gyrus	-0.05270304268369265
167	Midbrain raphe nuclei	superior rostral gyrus	0.030604332631557856
167	Midbrain raphe nuclei	insula	0.00696749915699461
167	Midbrain raphe nuclei	cuneus	-0.1110360164377344
167	Midbrain raphe nuclei	inferior occipital gyrus	-0.12183474805397906
167	Midbrain raphe nuclei	lingual gyrus	-0.1182903693359818
167	Midbrain raphe nuclei	occipital pole	-0.1480824703159897
167	Midbrain raphe nuclei	occipito-temporal gyrus	-0.11680629117933265
167	Midbrain raphe nuclei	superior occipital gyrus	-0.10820531904036437
167	Midbrain raphe nuclei	inferior parietal lobule	-0.10354228406617715
167	Midbrain raphe nuclei	paracentral lobule, posterior part	-0.1060505770216523
167	Midbrain raphe nuclei	postcentral gyrus	-0.12984657214347117
167	Midbrain raphe nuclei	precuneus	-0.0982091062710141
167	Midbrain raphe nuclei	superior parietal lobule	-0.11027444842631011
167	Midbrain raphe nuclei	fusiform gyrus	0.0215020706500603
167	Midbrain raphe nuclei	Heschl's gyrus	-0.11147153387392013
167	Midbrain raphe nuclei	inferior temporal gyrus	-0.021364673436314024
167	Midbrain raphe nuclei	middle temporal gyrus	-0.0681814595101558
167	Midbrain raphe nuclei	planum polare	-0.011240501952078324
167	Midbrain raphe nuclei	planum temporale	-0.06675172879853666
167	Midbrain raphe nuclei	superior temporal gyrus	-0.07469026759371293
167	Midbrain raphe nuclei	temporal pole	0.09993664407535892
167	Midbrain raphe nuclei	transverse gyri	-0.11556698033780792
167	Midbrain raphe nuclei	amygdala	0.6188120428564289
167	Midbrain raphe nuclei	globus pallidus	0.7085658881693686
167	Midbrain raphe nuclei	caudate nucleus	0.3878947118105316
167	Midbrain raphe nuclei	nucleus accumbens	0.5207637485742075
167	Midbrain raphe nuclei	putamen	0.40044486065084894
167	Midbrain raphe nuclei	septal nuclei	0.7981852857989574
167	Midbrain raphe nuclei	substantia innominata	0.8046311639243187
167	Midbrain raphe nuclei	epithalamus	0.7797890494271174
167	Midbrain raphe nuclei	hypothalamus	0.8608934772195077
167	Midbrain raphe nuclei	subthalamus	0.7889440709668699
167	Midbrain raphe nuclei	thalamus	0.7726048506755472
167	Midbrain raphe nuclei	inferior colliculus	0.7698889182944044
167	Midbrain raphe nuclei	superior colliculus	0.880130269044533
167	Midbrain raphe nuclei	midbrain tegmentum	0.8442605298859316
167	Midbrain raphe nuclei	pretectal region	0.8513424687983208
167	Midbrain raphe nuclei	pons	0.7913475250361365
167	Midbrain raphe nuclei	myelencephalon	0.7620118308716584
167	Midbrain raphe nuclei	vermal I-II	0.4738827854552605
167	Midbrain raphe nuclei	vermal III	0.31393227290576786
167	Midbrain raphe nuclei	vermal IV	0.26145911768456714
167	Midbrain raphe nuclei	vermal V	0.21757464267614637
167	Midbrain raphe nuclei	vermal VI	0.2888161769774232
167	Midbrain raphe nuclei	vermal VIIAf	0.24151041699316608
167	Midbrain raphe nuclei	vermal VIIAt	0.20742930149939712
167	Midbrain raphe nuclei	vermal VIIB	0.270530566111085
167	Midbrain raphe nuclei	vermal VIIIA	0.22579708360801892
167	Midbrain raphe nuclei	vermal VIIIB	0.34139696925901497
167	Midbrain raphe nuclei	vermal IX	0.27299434613456935
167	Midbrain raphe nuclei	vermal X	0.5414088380097638
167	Midbrain raphe nuclei	III	0.31414082752306327
167	Midbrain raphe nuclei	IV	0.2570764087764511
167	Midbrain raphe nuclei	V	0.21805104652085838
167	Midbrain raphe nuclei	VI	0.20910759556246555
167	Midbrain raphe nuclei	crus I	0.21779759146913993
167	Midbrain raphe nuclei	crus II	0.18406217024473215
167	Midbrain raphe nuclei	VIIB	0.21082230205049055
167	Midbrain raphe nuclei	VIIIA	0.1833853371779403
167	Midbrain raphe nuclei	VIIIB	0.2318350160856991
167	Midbrain raphe nuclei	IX	0.17826224203336377
167	Midbrain raphe nuclei	X	0.3335698976712011
167	Midbrain raphe nuclei	cerebellar nuclei	0.7228765808997611
167	Midbrain-other	claustrum	-0.039870936924477476
167	Midbrain-other	dentate gyrus	0.05965654252895163
167	Midbrain-other	CA1 field	0.1257377906418094
167	Midbrain-other	CA2 field	0.14886564855188755
167	Midbrain-other	CA3 field	0.17805357738663477
167	Midbrain-other	CA4 field	0.16563817985078103
167	Midbrain-other	subiculum	0.24244878073357143
167	Midbrain-other	cingulate gyrus	-0.019870529645246694
167	Midbrain-other	parahippocampal gyrus	0.014371682751238301
167	Midbrain-other	piriform cortex	0.1292577366500456
167	Midbrain-other	anterior orbital gyrus	-0.009906709796937717
167	Midbrain-other	frontal operculum	-0.06838015813433998
167	Midbrain-other	frontal pole	0.020033687885248754
167	Midbrain-other	gyrus rectus	-0.055517113401066694
167	Midbrain-other	inferior frontal gyrus	-0.003315781597082553
167	Midbrain-other	inferior rostral gyrus	-0.047211967394240696
167	Midbrain-other	lateral orbital gyrus	-0.010200106857437215
167	Midbrain-other	medial orbital gyrus	-0.035991757164843534
167	Midbrain-other	middle frontal gyrus	0.03697675707032458
167	Midbrain-other	paracentral lobule, anterior part	0.08445075658025493
167	Midbrain-other	paraterminal gyrus	0.21295174279089824
167	Midbrain-other	parolfactory gyri	-0.006164342423645547
167	Midbrain-other	posterior orbital gyrus	-0.04267344036014774
167	Midbrain-other	precentral gyrus	0.12137051743986685
167	Midbrain-other	superior frontal gyrus	0.007523312837187907
167	Midbrain-other	superior rostral gyrus	-0.022727766479231352
167	Midbrain-other	insula	-0.08020378149589838
167	Midbrain-other	cuneus	0.12911420127838744
167	Midbrain-other	inferior occipital gyrus	0.07731908830251494
167	Midbrain-other	lingual gyrus	0.10624142691553569
167	Midbrain-other	occipital pole	0.051299473098418605
167	Midbrain-other	occipito-temporal gyrus	0.02850377640136913
167	Midbrain-other	superior occipital gyrus	0.09958254019492976
167	Midbrain-other	inferior parietal lobule	0.023783002238522734
167	Midbrain-other	paracentral lobule, posterior part	0.08761760499432822
167	Midbrain-other	postcentral gyrus	0.10637467438975436
167	Midbrain-other	precuneus	0.05015570927744585
167	Midbrain-other	superior parietal lobule	0.08573261116152789
167	Midbrain-other	fusiform gyrus	-0.0613797749880056
167	Midbrain-other	Heschl's gyrus	0.048207092082806005
167	Midbrain-other	inferior temporal gyrus	-0.04454115770478946
167	Midbrain-other	middle temporal gyrus	-0.031592949544818345
167	Midbrain-other	planum polare	-0.060011885479698227
167	Midbrain-other	planum temporale	0.05689741259262175
167	Midbrain-other	superior temporal gyrus	-0.010578981298709489
167	Midbrain-other	temporal pole	-0.07322027258573319
167	Midbrain-other	transverse gyri	0.04146986747124273
167	Midbrain-other	amygdala	0.3031441984229821
167	Midbrain-other	globus pallidus	0.5295703970871208
167	Midbrain-other	caudate nucleus	0.22634437514269265
167	Midbrain-other	nucleus accumbens	0.2902346919308117
167	Midbrain-other	putamen	0.25049048558690473
167	Midbrain-other	septal nuclei	0.5709274626586865
167	Midbrain-other	substantia innominata	0.6201090280903242
167	Midbrain-other	epithalamus	0.6012866278353367
167	Midbrain-other	hypothalamus	0.7221658448507069
167	Midbrain-other	subthalamus	0.6716853658553329
167	Midbrain-other	thalamus	0.7030425335525821
167	Midbrain-other	inferior colliculus	0.6930009386989621
167	Midbrain-other	superior colliculus	0.8040167974982184
167	Midbrain-other	midbrain tegmentum	0.7187112047845743
167	Midbrain-other	pretectal region	0.7290681447041134
167	Midbrain-other	pons	0.6908301694839214
167	Midbrain-other	myelencephalon	0.6245607700476702
167	Midbrain-other	vermal I-II	0.3638206164852371
167	Midbrain-other	vermal III	0.1925383175496625
167	Midbrain-other	vermal IV	0.14383385176508315
167	Midbrain-other	vermal V	0.11209206632993399
167	Midbrain-other	vermal VI	0.15506268583961774
167	Midbrain-other	vermal VIIAf	0.11874663347110523
167	Midbrain-other	vermal VIIAt	0.08880507866428979
167	Midbrain-other	vermal VIIB	0.15424134363996284
167	Midbrain-other	vermal VIIIA	0.11015742947502925
167	Midbrain-other	vermal VIIIB	0.22352467118438826
167	Midbrain-other	vermal IX	0.16509532729380755
167	Midbrain-other	vermal X	0.44049581566758217
167	Midbrain-other	III	0.20480212115799543
167	Midbrain-other	IV	0.13655624042973405
167	Midbrain-other	V	0.11041550493121019
167	Midbrain-other	VI	0.09954279843428965
167	Midbrain-other	crus I	0.10584836962710836
167	Midbrain-other	crus II	0.07297941819952125
167	Midbrain-other	VIIB	0.10003424770419785
167	Midbrain-other	VIIIA	0.06768014775957383
167	Midbrain-other	VIIIB	0.10073781496986961
167	Midbrain-other	IX	0.050455729626196745
167	Midbrain-other	X	0.22219393073542043
167	Midbrain-other	cerebellar nuclei	0.6026611029163864
167	Periaqueductal gray	claustrum	0.024287000106842118
167	Periaqueductal gray	dentate gyrus	0.08183750444830863
167	Periaqueductal gray	CA1 field	0.14457322398017639
167	Periaqueductal gray	CA2 field	0.0740912746204233
167	Periaqueductal gray	CA3 field	0.09437369583061231
167	Periaqueductal gray	CA4 field	0.09040053440899615
167	Periaqueductal gray	subiculum	0.2861151311487135
167	Periaqueductal gray	cingulate gyrus	0.02310844341532018
167	Periaqueductal gray	parahippocampal gyrus	0.07425387925213332
167	Periaqueductal gray	piriform cortex	0.25930750362977645
167	Periaqueductal gray	anterior orbital gyrus	0.031002224687794126
167	Periaqueductal gray	frontal operculum	-0.055921467667933454
167	Periaqueductal gray	frontal pole	0.06892718796359444
167	Periaqueductal gray	gyrus rectus	-0.007238474425897213
167	Periaqueductal gray	inferior frontal gyrus	-0.012898933100823748
167	Periaqueductal gray	inferior rostral gyrus	-0.009107682822666757
167	Periaqueductal gray	lateral orbital gyrus	0.02383455927369776
167	Periaqueductal gray	medial orbital gyrus	0.007962706474596766
167	Periaqueductal gray	middle frontal gyrus	0.024606784820380766
167	Periaqueductal gray	paracentral lobule, anterior part	0.0407585646080325
167	Periaqueductal gray	paraterminal gyrus	0.37648397444848525
167	Periaqueductal gray	parolfactory gyri	0.07934769364792163
167	Periaqueductal gray	posterior orbital gyrus	-0.004345900969244842
167	Periaqueductal gray	precentral gyrus	0.06839605892891774
167	Periaqueductal gray	superior frontal gyrus	0.007564391936904707
167	Periaqueductal gray	superior rostral gyrus	0.024994603849912506
167	Periaqueductal gray	insula	-0.05234180279528845
167	Periaqueductal gray	cuneus	0.08554591329867421
167	Periaqueductal gray	inferior occipital gyrus	0.04339747212541312
167	Periaqueductal gray	lingual gyrus	0.06802950528922261
167	Periaqueductal gray	occipital pole	0.00704103654673095
167	Periaqueductal gray	occipito-temporal gyrus	0.004271306001997388
167	Periaqueductal gray	superior occipital gyrus	0.07604358220229258
167	Periaqueductal gray	inferior parietal lobule	-0.0037919983991279
167	Periaqueductal gray	paracentral lobule, posterior part	0.022242024904336757
167	Periaqueductal gray	postcentral gyrus	0.05786355152790835
167	Periaqueductal gray	precuneus	0.0322899360943492
167	Periaqueductal gray	superior parietal lobule	0.05134873743487781
167	Periaqueductal gray	fusiform gyrus	-0.04749412611094203
167	Periaqueductal gray	Heschl's gyrus	0.025855157730438883
167	Periaqueductal gray	inferior temporal gyrus	-0.03491543111701928
167	Periaqueductal gray	middle temporal gyrus	-0.033891011958892624
167	Periaqueductal gray	planum polare	-0.03913664121656715
167	Periaqueductal gray	planum temporale	0.04735449968224575
167	Periaqueductal gray	superior temporal gyrus	-0.019779541079604664
167	Periaqueductal gray	temporal pole	-0.03185373751093999
167	Periaqueductal gray	transverse gyri	0.020956799235004334
167	Periaqueductal gray	amygdala	0.4332243577790324
167	Periaqueductal gray	globus pallidus	0.47562731150937654
167	Periaqueductal gray	caudate nucleus	0.2670531699565795
167	Periaqueductal gray	nucleus accumbens	0.37300102295413895
167	Periaqueductal gray	putamen	0.2933673321606911
167	Periaqueductal gray	septal nuclei	0.6957262956304009
167	Periaqueductal gray	substantia innominata	0.6856580937204236
167	Periaqueductal gray	epithalamus	0.6099744689633482
167	Periaqueductal gray	hypothalamus	0.7736128569029789
167	Periaqueductal gray	subthalamus	0.5771268094277211
167	Periaqueductal gray	thalamus	0.5978606630959348
167	Periaqueductal gray	inferior colliculus	0.6380933317203452
167	Periaqueductal gray	superior colliculus	0.7415625267741979
167	Periaqueductal gray	midbrain tegmentum	0.6662980958000575
167	Periaqueductal gray	pretectal region	0.6802528253105506
167	Periaqueductal gray	pons	0.5801424255440388
167	Periaqueductal gray	myelencephalon	0.5305762733248188
167	Periaqueductal gray	vermal I-II	0.2703448017687378
167	Periaqueductal gray	vermal III	0.10132461562838717
167	Periaqueductal gray	vermal IV	0.044452176545039114
167	Periaqueductal gray	vermal V	-0.0021357078316576418
167	Periaqueductal gray	vermal VI	0.05408676107147118
167	Periaqueductal gray	vermal VIIAf	0.01917869088502873
167	Periaqueductal gray	vermal VIIAt	-0.010080590754032708
167	Periaqueductal gray	vermal VIIB	0.055327769480795146
167	Periaqueductal gray	vermal VIIIA	0.013764717903668127
167	Periaqueductal gray	vermal VIIIB	0.13641762251036288
167	Periaqueductal gray	vermal IX	0.06380367284024765
167	Periaqueductal gray	vermal X	0.3868413170951482
167	Periaqueductal gray	III	0.09458800956863377
167	Periaqueductal gray	IV	0.026390315070990385
167	Periaqueductal gray	V	-0.007630243732958642
167	Periaqueductal gray	VI	-0.01401764526966292
167	Periaqueductal gray	crus I	-0.002865838268696802
167	Periaqueductal gray	crus II	-0.04219728121679777
167	Periaqueductal gray	VIIB	-0.012290298667332082
167	Periaqueductal gray	VIIIA	-0.040305030125223705
167	Periaqueductal gray	VIIIB	-0.008578104862828137
167	Periaqueductal gray	IX	-0.06035623955205339
167	Periaqueductal gray	X	0.11769642804123104
167	Periaqueductal gray	cerebellar nuclei	0.4954133197120854
167	Pons	claustrum	-0.00931425942067607
167	Pons	dentate gyrus	0.16632197903486873
167	Pons	CA1 field	0.2754303651459304
167	Pons	CA2 field	0.29281942725088206
167	Pons	CA3 field	0.29129264948143735
167	Pons	CA4 field	0.2868685333276999
167	Pons	subiculum	0.31178730054861287
167	Pons	cingulate gyrus	0.03337795219369045
167	Pons	parahippocampal gyrus	0.12054720649295844
167	Pons	piriform cortex	0.17571373266543067
167	Pons	anterior orbital gyrus	0.013743118063580093
167	Pons	frontal operculum	0.0034148739767690395
167	Pons	frontal pole	-0.002400849154750931
167	Pons	gyrus rectus	0.022867061445267203
167	Pons	inferior frontal gyrus	-0.004171853293564994
167	Pons	inferior rostral gyrus	0.03384517614281717
167	Pons	lateral orbital gyrus	-0.004383817282914747
167	Pons	medial orbital gyrus	0.020210661434757474
167	Pons	middle frontal gyrus	0.015010765386792947
167	Pons	paracentral lobule, anterior part	0.0026986309055742337
167	Pons	paraterminal gyrus	0.19781646765256483
167	Pons	parolfactory gyri	0.0759135600684744
167	Pons	posterior orbital gyrus	0.0012124142339150251
167	Pons	precentral gyrus	0.019708586188942653
167	Pons	superior frontal gyrus	0.01549453627490704
167	Pons	superior rostral gyrus	0.017027919560515498
167	Pons	insula	0.016003511356198423
167	Pons	cuneus	-0.03680957669280188
167	Pons	inferior occipital gyrus	-0.022093181334838338
167	Pons	lingual gyrus	-0.04875104882132082
167	Pons	occipital pole	-0.06078485096464593
167	Pons	occipito-temporal gyrus	-0.019471589459857427
167	Pons	superior occipital gyrus	-0.023295973481949107
167	Pons	inferior parietal lobule	-0.0056025693557220785
167	Pons	paracentral lobule, posterior part	0.010471842712229649
167	Pons	postcentral gyrus	-0.01694932031441642
167	Pons	precuneus	-0.007217961393099807
167	Pons	superior parietal lobule	-0.010105784305761313
167	Pons	fusiform gyrus	0.04172714850317805
167	Pons	Heschl's gyrus	-0.023967395654479477
167	Pons	inferior temporal gyrus	0.0233445125674182
167	Pons	middle temporal gyrus	0.006375260706836238
167	Pons	planum polare	0.014750100534350453
167	Pons	planum temporale	0.005334004765745101
167	Pons	superior temporal gyrus	0.006115234362351919
167	Pons	temporal pole	0.0623088296277025
167	Pons	transverse gyri	-0.041673171364881745
167	Pons	amygdala	0.28358340557581174
167	Pons	globus pallidus	0.7408096305636293
167	Pons	caudate nucleus	0.18105786644997668
167	Pons	nucleus accumbens	0.24420943051908792
167	Pons	putamen	0.19360569675612177
167	Pons	septal nuclei	0.4423121012572916
167	Pons	substantia innominata	0.526142892367142
167	Pons	epithalamus	0.6916095712669705
167	Pons	hypothalamus	0.6327416482308227
167	Pons	subthalamus	0.8517175933413371
167	Pons	thalamus	0.745686694195727
167	Pons	inferior colliculus	0.7457551176878102
167	Pons	superior colliculus	0.8321998091618238
167	Pons	midbrain tegmentum	0.8311505743385672
167	Pons	pretectal region	0.813128750881211
167	Pons	pons	0.9030060543080648
167	Pons	myelencephalon	0.846668051788103
167	Pons	vermal I-II	0.49426011302924405
167	Pons	vermal III	0.3035726252476587
167	Pons	vermal IV	0.2616567215768236
167	Pons	vermal V	0.24027258051510383
167	Pons	vermal VI	0.29956665579293384
167	Pons	vermal VIIAf	0.24965799820694037
167	Pons	vermal VIIAt	0.2039357995751764
167	Pons	vermal VIIB	0.26459064885333444
167	Pons	vermal VIIIA	0.22496744570283864
167	Pons	vermal VIIIB	0.320543236828494
167	Pons	vermal IX	0.26894270656480174
167	Pons	vermal X	0.49636667529679573
167	Pons	III	0.3407616425188737
167	Pons	IV	0.28391738880989653
167	Pons	V	0.25187957955662166
167	Pons	VI	0.23364220088456733
167	Pons	crus I	0.23367410537477576
167	Pons	crus II	0.21740171138699152
167	Pons	VIIB	0.23188033592213841
167	Pons	VIIIA	0.19777608347350184
167	Pons	VIIIB	0.25191408049627356
167	Pons	IX	0.2243434341748007
167	Pons	X	0.3503530043198165
167	Pons	cerebellar nuclei	0.8342700623809253
167	Medulla	claustrum	-0.0486008323593961
167	Medulla	dentate gyrus	-0.028535311511979456
167	Medulla	CA1 field	0.03187961332164696
167	Medulla	CA2 field	0.03547968070344859
167	Medulla	CA3 field	0.031165058677660316
167	Medulla	CA4 field	-0.008335492325916134
167	Medulla	subiculum	-0.005164610571527093
167	Medulla	cingulate gyrus	0.09769248301794815
167	Medulla	parahippocampal gyrus	-0.026257451332081086
167	Medulla	piriform cortex	-0.19460319296740985
167	Medulla	anterior orbital gyrus	0.09418375665325705
167	Medulla	frontal operculum	0.12324717275869132
167	Medulla	frontal pole	0.10256606472409587
167	Medulla	gyrus rectus	0.047649098764577145
167	Medulla	inferior frontal gyrus	0.19649889587492214
167	Medulla	inferior rostral gyrus	0.05736639176909188
167	Medulla	lateral orbital gyrus	0.1204657359815559
167	Medulla	medial orbital gyrus	0.07214544633151172
167	Medulla	middle frontal gyrus	0.21312236894580455
167	Medulla	paracentral lobule, anterior part	0.2898194732672895
167	Medulla	paraterminal gyrus	-0.07396061219397009
167	Medulla	parolfactory gyri	-0.06385365607928273
167	Medulla	posterior orbital gyrus	0.08605657353792921
167	Medulla	precentral gyrus	0.3137472872727475
167	Medulla	superior frontal gyrus	0.18085991638307775
167	Medulla	superior rostral gyrus	0.06779501629448904
167	Medulla	insula	0.06203945065355214
167	Medulla	cuneus	0.23468341612915955
167	Medulla	inferior occipital gyrus	0.24544435754685884
167	Medulla	lingual gyrus	0.22568133207076083
167	Medulla	occipital pole	0.23125108508285025
167	Medulla	occipito-temporal gyrus	0.22569095621297125
167	Medulla	superior occipital gyrus	0.23123981864465395
167	Medulla	inferior parietal lobule	0.2298639095647489
167	Medulla	paracentral lobule, posterior part	0.2778137483266888
167	Medulla	postcentral gyrus	0.2733983132798562
167	Medulla	precuneus	0.23272737668525734
167	Medulla	superior parietal lobule	0.2587578158382015
167	Medulla	fusiform gyrus	0.07937939569909713
167	Medulla	Heschl's gyrus	0.21632554215323083
167	Medulla	inferior temporal gyrus	0.12110523852621144
167	Medulla	middle temporal gyrus	0.1668454471811889
167	Medulla	planum polare	0.08890503371394289
167	Medulla	planum temporale	0.22197376893206797
167	Medulla	superior temporal gyrus	0.18312412082103968
167	Medulla	temporal pole	5.632006213481803e-4
167	Medulla	transverse gyri	0.21099212459775726
167	Medulla	amygdala	-0.16100932644972746
167	Medulla	globus pallidus	0.5311765197501237
167	Medulla	caudate nucleus	-0.02839529602697714
167	Medulla	nucleus accumbens	-0.09821229947865977
167	Medulla	putamen	-0.010535295463233113
167	Medulla	septal nuclei	0.0037913902719558515
167	Medulla	substantia innominata	0.08709870140415107
167	Medulla	epithalamus	0.45454433177093406
167	Medulla	hypothalamus	0.22476788533080913
167	Medulla	subthalamus	0.6255257651791002
167	Medulla	thalamus	0.619920581696694
167	Medulla	inferior colliculus	0.5841858458405423
167	Medulla	superior colliculus	0.5845237215698585
167	Medulla	midbrain tegmentum	0.5395950722535703
167	Medulla	pretectal region	0.5576858220470816
167	Medulla	pons	0.6870753505881679
167	Medulla	myelencephalon	0.667887416754146
167	Medulla	vermal I-II	0.6218903933629961
167	Medulla	vermal III	0.5098771068709407
167	Medulla	vermal IV	0.4903477182074794
167	Medulla	vermal V	0.5026530496890875
167	Medulla	vermal VI	0.5001304659154246
167	Medulla	vermal VIIAf	0.47984861807080376
167	Medulla	vermal VIIAt	0.4546030706730052
167	Medulla	vermal VIIB	0.5063898663648576
167	Medulla	vermal VIIIA	0.47448004518278186
167	Medulla	vermal VIIIB	0.5149210720405443
167	Medulla	vermal IX	0.5144548298266692
167	Medulla	vermal X	0.5744928159551133
167	Medulla	III	0.5436344932136289
167	Medulla	IV	0.5175747311740757
167	Medulla	V	0.5067782645089932
167	Medulla	VI	0.4903112601369931
167	Medulla	crus I	0.48704605552615493
167	Medulla	crus II	0.4871200942013985
167	Medulla	VIIB	0.4922252961849319
167	Medulla	VIIIA	0.46070428672752767
167	Medulla	VIIIB	0.48700816140363107
167	Medulla	IX	0.4875862583415366
167	Medulla	X	0.5583288104948776
167	Medulla	cerebellar nuclei	0.685118740890694
167	Lingula (I)	claustrum	0.06988642239196517
167	Lingula (I)	dentate gyrus	0.1954392791660404
167	Lingula (I)	CA1 field	0.3334425832264981
167	Lingula (I)	CA2 field	0.12295172418050526
167	Lingula (I)	CA3 field	0.10249468142563611
167	Lingula (I)	CA4 field	0.10432621816614529
167	Lingula (I)	subiculum	0.32535869640076776
167	Lingula (I)	cingulate gyrus	0.2411953200896704
167	Lingula (I)	parahippocampal gyrus	0.22171834328535056
167	Lingula (I)	piriform cortex	0.24069186011580906
167	Lingula (I)	anterior orbital gyrus	0.23957615943651095
167	Lingula (I)	frontal operculum	0.1465902479405516
167	Lingula (I)	frontal pole	0.2884721624256431
167	Lingula (I)	gyrus rectus	0.17935700327904436
167	Lingula (I)	inferior frontal gyrus	0.18514136000830655
167	Lingula (I)	inferior rostral gyrus	0.15285995514419984
167	Lingula (I)	lateral orbital gyrus	0.247969230232652
167	Lingula (I)	medial orbital gyrus	0.19186311726373373
167	Lingula (I)	middle frontal gyrus	0.2137585856864719
167	Lingula (I)	paracentral lobule, anterior part	0.1869151748848478
167	Lingula (I)	paraterminal gyrus	0.4104769599374517
167	Lingula (I)	parolfactory gyri	0.15386456972252033
167	Lingula (I)	posterior orbital gyrus	0.2023431000945398
167	Lingula (I)	precentral gyrus	0.2006659675491905
167	Lingula (I)	superior frontal gyrus	0.21624339577106064
167	Lingula (I)	superior rostral gyrus	0.19701437189895452
167	Lingula (I)	insula	0.13358423438979786
167	Lingula (I)	cuneus	0.19884982078559893
167	Lingula (I)	inferior occipital gyrus	0.21450332287710647
167	Lingula (I)	lingual gyrus	0.20431009799019986
167	Lingula (I)	occipital pole	0.17037484252609938
167	Lingula (I)	occipito-temporal gyrus	0.20586747460819488
167	Lingula (I)	superior occipital gyrus	0.23447193450179768
167	Lingula (I)	inferior parietal lobule	0.19348820139402723
167	Lingula (I)	paracentral lobule, posterior part	0.15268217926617625
167	Lingula (I)	postcentral gyrus	0.19023118827775218
167	Lingula (I)	precuneus	0.23310432835746278
167	Lingula (I)	superior parietal lobule	0.2267310154328192
167	Lingula (I)	fusiform gyrus	0.13385330868701942
167	Lingula (I)	Heschl's gyrus	0.2186716834255908
167	Lingula (I)	inferior temporal gyrus	0.16223339226500955
167	Lingula (I)	middle temporal gyrus	0.18250739835122104
167	Lingula (I)	planum polare	0.15472046381373045
167	Lingula (I)	planum temporale	0.2611985025327462
167	Lingula (I)	superior temporal gyrus	0.17932000046410085
167	Lingula (I)	temporal pole	0.12275345049946151
167	Lingula (I)	transverse gyri	0.22948904792042377
167	Lingula (I)	amygdala	0.3547189209928661
167	Lingula (I)	globus pallidus	0.7340350388375925
167	Lingula (I)	caudate nucleus	0.4733132947395224
167	Lingula (I)	nucleus accumbens	0.45470985915975776
167	Lingula (I)	putamen	0.5041800174804066
167	Lingula (I)	septal nuclei	0.5468646522686351
167	Lingula (I)	substantia innominata	0.4932229018231497
167	Lingula (I)	epithalamus	0.6414976129603948
167	Lingula (I)	hypothalamus	0.469158669378442
167	Lingula (I)	subthalamus	0.691396704041389
167	Lingula (I)	thalamus	0.7594296754663582
167	Lingula (I)	inferior colliculus	0.8088765972215686
167	Lingula (I)	superior colliculus	0.7586404264035209
167	Lingula (I)	midbrain tegmentum	0.6309640231466286
167	Lingula (I)	pretectal region	0.7209931566855214
167	Lingula (I)	pons	0.6211073741316485
167	Lingula (I)	myelencephalon	0.6286481404616137
167	Lingula (I)	vermal I-II	0.5905994782076232
167	Lingula (I)	vermal III	0.43397169485650083
167	Lingula (I)	vermal IV	0.3586421871400097
167	Lingula (I)	vermal V	0.3149802658500985
167	Lingula (I)	vermal VI	0.35198259080738636
167	Lingula (I)	vermal VIIAf	0.320200757989086
167	Lingula (I)	vermal VIIAt	0.3002913948277662
167	Lingula (I)	vermal VIIB	0.36442249408994293
167	Lingula (I)	vermal VIIIA	0.320587661778642
167	Lingula (I)	vermal VIIIB	0.43227424725733504
167	Lingula (I)	vermal IX	0.3490803573505606
167	Lingula (I)	vermal X	0.6187771017051764
167	Lingula (I)	III	0.44728325998877516
167	Lingula (I)	IV	0.37339366742270863
167	Lingula (I)	V	0.3150113574855321
167	Lingula (I)	VI	0.29162068039093536
167	Lingula (I)	crus I	0.29623753673384184
167	Lingula (I)	crus II	0.26006196316030467
167	Lingula (I)	VIIB	0.294323547730317
167	Lingula (I)	VIIIA	0.26347025779485683
167	Lingula (I)	VIIIB	0.29863863726543044
167	Lingula (I)	IX	0.2713079460364155
167	Lingula (I)	X	0.4418988362521311
167	Lingula (I)	cerebellar nuclei	0.7001326025018891
167	Central lobule	claustrum	0.10413221504191172
167	Central lobule	dentate gyrus	0.2102448592512359
167	Central lobule	CA1 field	0.3517760219356004
167	Central lobule	CA2 field	0.14714029389803723
167	Central lobule	CA3 field	0.11995352992769967
167	Central lobule	CA4 field	0.1256075423747379
167	Central lobule	subiculum	0.31446928984866684
167	Central lobule	cingulate gyrus	0.2666695971593689
167	Central lobule	parahippocampal gyrus	0.250456205361467
167	Central lobule	piriform cortex	0.23745419608524607
167	Central lobule	anterior orbital gyrus	0.2625988751902825
167	Central lobule	frontal operculum	0.18238662416884358
167	Central lobule	frontal pole	0.3073989592853191
167	Central lobule	gyrus rectus	0.2101362287331566
167	Central lobule	inferior frontal gyrus	0.20716975240835667
167	Central lobule	inferior rostral gyrus	0.18260454852654792
167	Central lobule	lateral orbital gyrus	0.2697831937731835
167	Central lobule	medial orbital gyrus	0.2186015395035902
167	Central lobule	middle frontal gyrus	0.23045699738443015
167	Central lobule	paracentral lobule, anterior part	0.18936707578969225
167	Central lobule	paraterminal gyrus	0.38539130554845746
167	Central lobule	parolfactory gyri	0.17433872873463535
167	Central lobule	posterior orbital gyrus	0.23215012170724794
167	Central lobule	precentral gyrus	0.1988247473858132
167	Central lobule	superior frontal gyrus	0.23886293277116688
167	Central lobule	superior rostral gyrus	0.2186079389340494
167	Central lobule	insula	0.1694698341998077
167	Central lobule	cuneus	0.18799550051712746
167	Central lobule	inferior occipital gyrus	0.2175288158796925
167	Central lobule	lingual gyrus	0.19907706469347985
167	Central lobule	occipital pole	0.17329574382624138
167	Central lobule	occipito-temporal gyrus	0.2210167936832361
167	Central lobule	superior occipital gyrus	0.2315974477874832
167	Central lobule	inferior parietal lobule	0.21210710911624175
167	Central lobule	paracentral lobule, posterior part	0.16042954069138568
167	Central lobule	postcentral gyrus	0.18646305708975872
167	Central lobule	precuneus	0.24605611737766764
167	Central lobule	superior parietal lobule	0.23292136907554373
167	Central lobule	fusiform gyrus	0.17103629052387898
167	Central lobule	Heschl's gyrus	0.22719240915889374
167	Central lobule	inferior temporal gyrus	0.19515358340535763
167	Central lobule	middle temporal gyrus	0.21175774598388317
167	Central lobule	planum polare	0.18676619059995514
167	Central lobule	planum temporale	0.27267869624268676
167	Central lobule	superior temporal gyrus	0.2043063296038643
167	Central lobule	temporal pole	0.1602894116860784
167	Central lobule	transverse gyri	0.24254346716197
167	Central lobule	amygdala	0.33075687914928664
167	Central lobule	globus pallidus	0.7174313348708673
167	Central lobule	caudate nucleus	0.4951996411853035
167	Central lobule	nucleus accumbens	0.4563799200239746
167	Central lobule	putamen	0.5243404712287328
167	Central lobule	septal nuclei	0.46123521928134265
167	Central lobule	substantia innominata	0.4058718944253319
167	Central lobule	epithalamus	0.558376309341173
167	Central lobule	hypothalamus	0.35421427089196944
167	Central lobule	subthalamus	0.6423046896631689
167	Central lobule	thalamus	0.7074814367389489
167	Central lobule	inferior colliculus	0.7490960103744259
167	Central lobule	superior colliculus	0.6698732659330617
167	Central lobule	midbrain tegmentum	0.5465037835014307
167	Central lobule	pretectal region	0.6427918051751625
167	Central lobule	pons	0.5582249145262939
167	Central lobule	myelencephalon	0.577077564276718
167	Central lobule	vermal I-II	0.6249594144547496
167	Central lobule	vermal III	0.5027304703822094
167	Central lobule	vermal IV	0.43914923443807885
167	Central lobule	vermal V	0.4051295846151517
167	Central lobule	vermal VI	0.42855968369450864
167	Central lobule	vermal VIIAf	0.4036264603834526
167	Central lobule	vermal VIIAt	0.3927588243172211
167	Central lobule	vermal VIIB	0.43965790481818556
167	Central lobule	vermal VIIIA	0.4052345218704889
167	Central lobule	vermal VIIIB	0.49222320941996417
167	Central lobule	vermal IX	0.4202510486105968
167	Central lobule	vermal X	0.608552468398712
167	Central lobule	III	0.5340036311392783
167	Central lobule	IV	0.4634634605337239
167	Central lobule	V	0.4091073549090677
167	Central lobule	VI	0.38368386562306306
167	Central lobule	crus I	0.3836371372789035
167	Central lobule	crus II	0.35474868714203767
167	Central lobule	VIIB	0.38477282705839194
167	Central lobule	VIIIA	0.3591758665473291
167	Central lobule	VIIIB	0.38975533824356007
167	Central lobule	IX	0.3740422099425789
167	Central lobule	X	0.49950154383367446
167	Central lobule	cerebellar nuclei	0.664821306559006
167	Culmen	claustrum	0.030445461131829585
167	Culmen	dentate gyrus	0.2087917560780547
167	Culmen	CA1 field	0.3009262281598249
167	Culmen	CA2 field	0.15456220241593882
167	Culmen	CA3 field	0.14350066591807167
167	Culmen	CA4 field	0.15549436722413887
167	Culmen	subiculum	0.21485126473243915
167	Culmen	cingulate gyrus	0.20497613171418191
167	Culmen	parahippocampal gyrus	0.16650937709397887
167	Culmen	piriform cortex	0.11306951939106283
167	Culmen	anterior orbital gyrus	0.20706367615526944
167	Culmen	frontal operculum	0.15056667059804982
167	Culmen	frontal pole	0.24160185387045072
167	Culmen	gyrus rectus	0.15029792338650352
167	Culmen	inferior frontal gyrus	0.19426550586645075
167	Culmen	inferior rostral gyrus	0.12698241014974487
167	Culmen	lateral orbital gyrus	0.22246246009247295
167	Culmen	medial orbital gyrus	0.16014550991469093
167	Culmen	middle frontal gyrus	0.21151851546465203
167	Culmen	paracentral lobule, anterior part	0.21177258768879495
167	Culmen	paraterminal gyrus	0.2516788012000318
167	Culmen	parolfactory gyri	0.09086180499841989
167	Culmen	posterior orbital gyrus	0.17870972137569596
167	Culmen	precentral gyrus	0.22826279176582193
167	Culmen	superior frontal gyrus	0.20934600665844863
167	Culmen	superior rostral gyrus	0.16155749856817392
167	Culmen	insula	0.13000284420271174
167	Culmen	cuneus	0.22472858088897726
167	Culmen	inferior occipital gyrus	0.23993349617089949
167	Culmen	lingual gyrus	0.2320604390474197
167	Culmen	occipital pole	0.21518500922128275
167	Culmen	occipito-temporal gyrus	0.22961533664831282
167	Culmen	superior occipital gyrus	0.24414222646766373
167	Culmen	inferior parietal lobule	0.21499466880122642
167	Culmen	paracentral lobule, posterior part	0.18292141380406807
167	Culmen	postcentral gyrus	0.22410901940231354
167	Culmen	precuneus	0.2418050496468909
167	Culmen	superior parietal lobule	0.24711497054184117
167	Culmen	fusiform gyrus	0.13798613401327878
167	Culmen	Heschl's gyrus	0.23487022330061424
167	Culmen	inferior temporal gyrus	0.16341698795823817
167	Culmen	middle temporal gyrus	0.19236718367766495
167	Culmen	planum polare	0.15513324129611022
167	Culmen	planum temporale	0.2588017913854821
167	Culmen	superior temporal gyrus	0.19121362594361385
167	Culmen	temporal pole	0.11211735021360879
167	Culmen	transverse gyri	0.2522597271589759
167	Culmen	amygdala	0.21621661632685446
167	Culmen	globus pallidus	0.6733872783228684
167	Culmen	caudate nucleus	0.4741984555664342
167	Culmen	nucleus accumbens	0.39150027142906174
167	Culmen	putamen	0.5046281395374144
167	Culmen	septal nuclei	0.32688544761159716
167	Culmen	substantia innominata	0.28416266601756396
167	Culmen	epithalamus	0.4584760388744622
167	Culmen	hypothalamus	0.21883606937406663
167	Culmen	subthalamus	0.5894760448144016
167	Culmen	thalamus	0.6458328505853507
167	Culmen	inferior colliculus	0.6510588836845574
167	Culmen	superior colliculus	0.5790657966096524
167	Culmen	midbrain tegmentum	0.45581672042349825
167	Culmen	pretectal region	0.5554199908586499
167	Culmen	pons	0.5108489799821742
167	Culmen	myelencephalon	0.5336755908491754
167	Culmen	vermal I-II	0.6984784005940666
167	Culmen	vermal III	0.6398853153655518
167	Culmen	vermal IV	0.5990397961739663
167	Culmen	vermal V	0.5875730019119385
167	Culmen	vermal VI	0.5749856964131965
167	Culmen	vermal VIIAf	0.5600560017984659
167	Culmen	vermal VIIAt	0.5669076973130047
167	Culmen	vermal VIIB	0.5884755423464002
167	Culmen	vermal VIIIA	0.5661350857324051
167	Culmen	vermal VIIIB	0.6117525580005043
167	Culmen	vermal IX	0.5715986446324232
167	Culmen	vermal X	0.6224846301681598
167	Culmen	III	0.6922486311802457
167	Culmen	IV	0.6295195091555492
167	Culmen	V	0.5901843596188769
167	Culmen	VI	0.5651573097207115
167	Culmen	crus I	0.5543936069457733
167	Culmen	crus II	0.5383927670584544
167	Culmen	VIIB	0.5626080290974164
167	Culmen	VIIIA	0.5432427951628811
167	Culmen	VIIIB	0.5611972373969312
167	Culmen	IX	0.5537470316405522
167	Culmen	X	0.620864267194726
167	Culmen	cerebellar nuclei	0.6304829375214913
167	Declive (VI)	claustrum	0.06036712399983566
167	Declive (VI)	dentate gyrus	0.18389931941028623
167	Declive (VI)	CA1 field	0.25477378830709885
167	Declive (VI)	CA2 field	0.16587432456202597
167	Declive (VI)	CA3 field	0.1572648536723744
167	Declive (VI)	CA4 field	0.18538973072915524
167	Declive (VI)	subiculum	0.1724514850536406
167	Declive (VI)	cingulate gyrus	0.16868865677200734
167	Declive (VI)	parahippocampal gyrus	0.181149684467661
167	Declive (VI)	piriform cortex	0.13234309936719926
167	Declive (VI)	anterior orbital gyrus	0.15909928603512122
167	Declive (VI)	frontal operculum	0.13310593851431834
167	Declive (VI)	frontal pole	0.1845277595351057
167	Declive (VI)	gyrus rectus	0.138816325773379
167	Declive (VI)	inferior frontal gyrus	0.13595850914927093
167	Declive (VI)	inferior rostral gyrus	0.13327155676920568
167	Declive (VI)	lateral orbital gyrus	0.16582191440930646
167	Declive (VI)	medial orbital gyrus	0.13964195123860723
167	Declive (VI)	middle frontal gyrus	0.14414683655228658
167	Declive (VI)	paracentral lobule, anterior part	0.11140128062055425
167	Declive (VI)	paraterminal gyrus	0.2229392234221426
167	Declive (VI)	parolfactory gyri	0.11312476750427224
167	Declive (VI)	posterior orbital gyrus	0.14377148919188026
167	Declive (VI)	precentral gyrus	0.1209016719577973
167	Declive (VI)	superior frontal gyrus	0.15358524545403163
167	Declive (VI)	superior rostral gyrus	0.13797802936280978
167	Declive (VI)	insula	0.13237377645160628
167	Declive (VI)	cuneus	0.1130691422387376
167	Declive (VI)	inferior occipital gyrus	0.1373219125156555
167	Declive (VI)	lingual gyrus	0.12934504118251958
167	Declive (VI)	occipital pole	0.12454343871885913
167	Declive (VI)	occipito-temporal gyrus	0.14800451219184887
167	Declive (VI)	superior occipital gyrus	0.13052570721006448
167	Declive (VI)	inferior parietal lobule	0.14347501848629082
167	Declive (VI)	paracentral lobule, posterior part	0.10576287502547035
167	Declive (VI)	postcentral gyrus	0.11517456715753278
167	Declive (VI)	precuneus	0.15600067696230258
167	Declive (VI)	superior parietal lobule	0.14530081903198858
167	Declive (VI)	fusiform gyrus	0.1394137284333949
167	Declive (VI)	Heschl's gyrus	0.13856896093719262
167	Declive (VI)	inferior temporal gyrus	0.14607767277336273
167	Declive (VI)	middle temporal gyrus	0.1529751757557467
167	Declive (VI)	planum polare	0.1338931033657936
167	Declive (VI)	planum temporale	0.17094446004483602
167	Declive (VI)	superior temporal gyrus	0.13926537813280676
167	Declive (VI)	temporal pole	0.14111105883335878
167	Declive (VI)	transverse gyri	0.15647577222611544
167	Declive (VI)	amygdala	0.19506708343874904
167	Declive (VI)	globus pallidus	0.5870887004268244
167	Declive (VI)	caudate nucleus	0.3267505308607401
167	Declive (VI)	nucleus accumbens	0.267081589552596
167	Declive (VI)	putamen	0.35799664679291077
167	Declive (VI)	septal nuclei	0.27062415426170316
167	Declive (VI)	substantia innominata	0.2217037450143154
167	Declive (VI)	epithalamus	0.45344774380121317
167	Declive (VI)	hypothalamus	0.1815889619400289
167	Declive (VI)	subthalamus	0.4907941845507385
167	Declive (VI)	thalamus	0.5429673610918789
167	Declive (VI)	inferior colliculus	0.5212685636096722
167	Declive (VI)	superior colliculus	0.45163791817719096
167	Declive (VI)	midbrain tegmentum	0.3870658914589269
167	Declive (VI)	pretectal region	0.4691620403184883
167	Declive (VI)	pons	0.42960410377884595
167	Declive (VI)	myelencephalon	0.49285973086145857
167	Declive (VI)	vermal I-II	0.8478434548118863
167	Declive (VI)	vermal III	0.8755725964223489
167	Declive (VI)	vermal IV	0.8600325264802351
167	Declive (VI)	vermal V	0.8535484830400191
167	Declive (VI)	vermal VI	0.8426836682963982
167	Declive (VI)	vermal VIIAf	0.8408294256832699
167	Declive (VI)	vermal VIIAt	0.8508614431516843
167	Declive (VI)	vermal VIIB	0.8559329043935924
167	Declive (VI)	vermal VIIIA	0.8453210482531065
167	Declive (VI)	vermal VIIIB	0.8538376753397032
167	Declive (VI)	vermal IX	0.8408817089729568
167	Declive (VI)	vermal X	0.7652854796402966
167	Declive (VI)	III	0.8985107171623723
167	Declive (VI)	IV	0.8773762719619288
167	Declive (VI)	V	0.8548813870899269
167	Declive (VI)	VI	0.8422956741753493
167	Declive (VI)	crus I	0.8379542697050573
167	Declive (VI)	crus II	0.8282073052448429
167	Declive (VI)	VIIB	0.8418730609137902
167	Declive (VI)	VIIIA	0.8345910831405632
167	Declive (VI)	VIIIB	0.8418915984666997
167	Declive (VI)	IX	0.8404821823320449
167	Declive (VI)	X	0.8513106661837423
167	Declive (VI)	cerebellar nuclei	0.5463230001838881
167	Folium-tuber vermis (VII)	claustrum	0.12250136732194224
167	Folium-tuber vermis (VII)	dentate gyrus	0.16927340602697882
167	Folium-tuber vermis (VII)	CA1 field	0.2495162768159657
167	Folium-tuber vermis (VII)	CA2 field	0.18586358241151887
167	Folium-tuber vermis (VII)	CA3 field	0.17158149891687785
167	Folium-tuber vermis (VII)	CA4 field	0.19835095698033636
167	Folium-tuber vermis (VII)	subiculum	0.20574135948936856
167	Folium-tuber vermis (VII)	cingulate gyrus	0.16649067603186185
167	Folium-tuber vermis (VII)	parahippocampal gyrus	0.22509908709589047
167	Folium-tuber vermis (VII)	piriform cortex	0.21225105893579524
167	Folium-tuber vermis (VII)	anterior orbital gyrus	0.14726883030260812
167	Folium-tuber vermis (VII)	frontal operculum	0.13003059968335837
167	Folium-tuber vermis (VII)	frontal pole	0.17101199475891765
167	Folium-tuber vermis (VII)	gyrus rectus	0.1537903189183212
167	Folium-tuber vermis (VII)	inferior frontal gyrus	0.09629745410336099
167	Folium-tuber vermis (VII)	inferior rostral gyrus	0.15895567321167578
167	Folium-tuber vermis (VII)	lateral orbital gyrus	0.14268542454397826
167	Folium-tuber vermis (VII)	medial orbital gyrus	0.1486551987813338
167	Folium-tuber vermis (VII)	middle frontal gyrus	0.10420260254371308
167	Folium-tuber vermis (VII)	paracentral lobule, anterior part	0.028414339277780677
167	Folium-tuber vermis (VII)	paraterminal gyrus	0.25777247870084385
167	Folium-tuber vermis (VII)	parolfactory gyri	0.16224851551501793
167	Folium-tuber vermis (VII)	posterior orbital gyrus	0.14030819480248624
167	Folium-tuber vermis (VII)	precentral gyrus	0.029863395731522708
167	Folium-tuber vermis (VII)	superior frontal gyrus	0.12486723343987534
167	Folium-tuber vermis (VII)	superior rostral gyrus	0.14261398659151545
167	Folium-tuber vermis (VII)	insula	0.1452080510968865
167	Folium-tuber vermis (VII)	cuneus	0.010029267110534798
167	Folium-tuber vermis (VII)	inferior occipital gyrus	0.04737433393306717
167	Folium-tuber vermis (VII)	lingual gyrus	0.03202488234283093
167	Folium-tuber vermis (VII)	occipital pole	0.026894532082473242
167	Folium-tuber vermis (VII)	occipito-temporal gyrus	0.07797500806158675
167	Folium-tuber vermis (VII)	superior occipital gyrus	0.040037436071395795
167	Folium-tuber vermis (VII)	inferior parietal lobule	0.08672578326942103
167	Folium-tuber vermis (VII)	paracentral lobule, posterior part	0.04198623783524461
167	Folium-tuber vermis (VII)	postcentral gyrus	0.01337627570716946
167	Folium-tuber vermis (VII)	precuneus	0.0926739014111914
167	Folium-tuber vermis (VII)	superior parietal lobule	0.0613167837572878
167	Folium-tuber vermis (VII)	fusiform gyrus	0.1501504664981396
167	Folium-tuber vermis (VII)	Heschl's gyrus	0.06117412042247388
167	Folium-tuber vermis (VII)	inferior temporal gyrus	0.14429796680889137
167	Folium-tuber vermis (VII)	middle temporal gyrus	0.12826806695945092
167	Folium-tuber vermis (VII)	planum polare	0.12699176038682203
167	Folium-tuber vermis (VII)	planum temporale	0.11158028247103732
167	Folium-tuber vermis (VII)	superior temporal gyrus	0.10435156079564623
167	Folium-tuber vermis (VII)	temporal pole	0.1754284691599033
167	Folium-tuber vermis (VII)	transverse gyri	0.07256107773640624
167	Folium-tuber vermis (VII)	amygdala	0.2423255227795586
167	Folium-tuber vermis (VII)	globus pallidus	0.6493368963407186
167	Folium-tuber vermis (VII)	caudate nucleus	0.22841437673323936
167	Folium-tuber vermis (VII)	nucleus accumbens	0.21798031496370984
167	Folium-tuber vermis (VII)	putamen	0.2627886695545074
167	Folium-tuber vermis (VII)	septal nuclei	0.34119123826677705
167	Folium-tuber vermis (VII)	substantia innominata	0.30454706406460963
167	Folium-tuber vermis (VII)	epithalamus	0.5930146813295908
167	Folium-tuber vermis (VII)	hypothalamus	0.3126933164695673
167	Folium-tuber vermis (VII)	subthalamus	0.5741788335338579
167	Folium-tuber vermis (VII)	thalamus	0.6178035027104972
167	Folium-tuber vermis (VII)	inferior colliculus	0.5992593520476369
167	Folium-tuber vermis (VII)	superior colliculus	0.5328501166729667
167	Folium-tuber vermis (VII)	midbrain tegmentum	0.5071973245337683
167	Folium-tuber vermis (VII)	pretectal region	0.5688691382344989
167	Folium-tuber vermis (VII)	pons	0.530188389386642
167	Folium-tuber vermis (VII)	myelencephalon	0.6039405163785614
167	Folium-tuber vermis (VII)	vermal I-II	0.9263441225187513
167	Folium-tuber vermis (VII)	vermal III	0.9244302619327386
167	Folium-tuber vermis (VII)	vermal IV	0.9036221292939314
167	Folium-tuber vermis (VII)	vermal V	0.8822581828680954
167	Folium-tuber vermis (VII)	vermal VI	0.9094213333691711
167	Folium-tuber vermis (VII)	vermal VIIAf	0.8967643248594209
167	Folium-tuber vermis (VII)	vermal VIIAt	0.8867912215739997
167	Folium-tuber vermis (VII)	vermal VIIB	0.9106162007295492
167	Folium-tuber vermis (VII)	vermal VIIIA	0.8934472612846943
167	Folium-tuber vermis (VII)	vermal VIIIB	0.9232286885713715
167	Folium-tuber vermis (VII)	vermal IX	0.8970349511734315
167	Folium-tuber vermis (VII)	vermal X	0.8797483865845107
167	Folium-tuber vermis (VII)	III	0.9242437068866979
167	Folium-tuber vermis (VII)	IV	0.913459934558328
167	Folium-tuber vermis (VII)	V	0.8881828958831394
167	Folium-tuber vermis (VII)	VI	0.8797345215574623
167	Folium-tuber vermis (VII)	crus I	0.8859290617380547
167	Folium-tuber vermis (VII)	crus II	0.8704980782751122
167	Folium-tuber vermis (VII)	VIIB	0.882655325930212
167	Folium-tuber vermis (VII)	VIIIA	0.8706470261480628
167	Folium-tuber vermis (VII)	VIIIB	0.8921116086565435
167	Folium-tuber vermis (VII)	IX	0.8844270686940392
167	Folium-tuber vermis (VII)	X	0.9195937830460574
167	Folium-tuber vermis (VII)	cerebellar nuclei	0.6287314474613972
167	Pyramus (VIII)	claustrum	0.09390974106608932
167	Pyramus (VIII)	dentate gyrus	0.15665539246626872
167	Pyramus (VIII)	CA1 field	0.23794823048125255
167	Pyramus (VIII)	CA2 field	0.19518338832318638
167	Pyramus (VIII)	CA3 field	0.1846797330494237
167	Pyramus (VIII)	CA4 field	0.2090025851595245
167	Pyramus (VIII)	subiculum	0.20286824285003804
167	Pyramus (VIII)	cingulate gyrus	0.1318171275071751
167	Pyramus (VIII)	parahippocampal gyrus	0.19460795044620594
167	Pyramus (VIII)	piriform cortex	0.19880424054184592
167	Pyramus (VIII)	anterior orbital gyrus	0.11190326735514058
167	Pyramus (VIII)	frontal operculum	0.09905394045094798
167	Pyramus (VIII)	frontal pole	0.1310911410186556
167	Pyramus (VIII)	gyrus rectus	0.1182835082111928
167	Pyramus (VIII)	inferior frontal gyrus	0.070174917811429
167	Pyramus (VIII)	inferior rostral gyrus	0.12672363856778565
167	Pyramus (VIII)	lateral orbital gyrus	0.10833844047569478
167	Pyramus (VIII)	medial orbital gyrus	0.11430200971821997
167	Pyramus (VIII)	middle frontal gyrus	0.07935050984753328
167	Pyramus (VIII)	paracentral lobule, anterior part	0.017452372353017654
167	Pyramus (VIII)	paraterminal gyrus	0.24205206047217784
167	Pyramus (VIII)	parolfactory gyri	0.1323095526748701
167	Pyramus (VIII)	posterior orbital gyrus	0.10487781339604711
167	Pyramus (VIII)	precentral gyrus	0.02171426694006461
167	Pyramus (VIII)	superior frontal gyrus	0.09596934258452602
167	Pyramus (VIII)	superior rostral gyrus	0.10849127789091664
167	Pyramus (VIII)	insula	0.11280812322521411
167	Pyramus (VIII)	cuneus	0.001642052079500755
167	Pyramus (VIII)	inferior occipital gyrus	0.0313182623735956
167	Pyramus (VIII)	lingual gyrus	0.020170260760768537
167	Pyramus (VIII)	occipital pole	0.012469582184401395
167	Pyramus (VIII)	occipito-temporal gyrus	0.056305126808237044
167	Pyramus (VIII)	superior occipital gyrus	0.023671811211549893
167	Pyramus (VIII)	inferior parietal lobule	0.06462887933230271
167	Pyramus (VIII)	paracentral lobule, posterior part	0.03235990912082388
167	Pyramus (VIII)	postcentral gyrus	0.003776346495279005
167	Pyramus (VIII)	precuneus	0.07028809684712885
167	Pyramus (VIII)	superior parietal lobule	0.04396126017392342
167	Pyramus (VIII)	fusiform gyrus	0.12077260950560087
167	Pyramus (VIII)	Heschl's gyrus	0.04092254020815143
167	Pyramus (VIII)	inferior temporal gyrus	0.11397728238518345
167	Pyramus (VIII)	middle temporal gyrus	0.09895701352357278
167	Pyramus (VIII)	planum polare	0.0968215595105686
167	Pyramus (VIII)	planum temporale	0.08769205579445673
167	Pyramus (VIII)	superior temporal gyrus	0.07778444992993169
167	Pyramus (VIII)	temporal pole	0.14442432819145642
167	Pyramus (VIII)	transverse gyri	0.04964392633802084
167	Pyramus (VIII)	amygdala	0.24876462524897947
167	Pyramus (VIII)	globus pallidus	0.7188085639401236
167	Pyramus (VIII)	caudate nucleus	0.22964977291913952
167	Pyramus (VIII)	nucleus accumbens	0.2267417115300708
167	Pyramus (VIII)	putamen	0.2648508592969304
167	Pyramus (VIII)	septal nuclei	0.3879211622787249
167	Pyramus (VIII)	substantia innominata	0.3766267264657338
167	Pyramus (VIII)	epithalamus	0.6821360099352923
167	Pyramus (VIII)	hypothalamus	0.40620690243564195
167	Pyramus (VIII)	subthalamus	0.6749375716490177
167	Pyramus (VIII)	thalamus	0.7081123933016171
167	Pyramus (VIII)	inferior colliculus	0.6993928852239129
167	Pyramus (VIII)	superior colliculus	0.639445372708967
167	Pyramus (VIII)	midbrain tegmentum	0.6166951392839298
167	Pyramus (VIII)	pretectal region	0.6708505720866118
167	Pyramus (VIII)	pons	0.6428766524286261
167	Pyramus (VIII)	myelencephalon	0.7085776202695706
167	Pyramus (VIII)	vermal I-II	0.9555403282229934
167	Pyramus (VIII)	vermal III	0.9120906787508979
167	Pyramus (VIII)	vermal IV	0.8819367039075303
167	Pyramus (VIII)	vermal V	0.8552973240253321
167	Pyramus (VIII)	vermal VI	0.8990954679061981
167	Pyramus (VIII)	vermal VIIAf	0.8757995381995267
167	Pyramus (VIII)	vermal VIIAt	0.853326021383798
167	Pyramus (VIII)	vermal VIIB	0.8969318251373876
167	Pyramus (VIII)	vermal VIIIA	0.868037047252608
167	Pyramus (VIII)	vermal VIIIB	0.9218305866688051
167	Pyramus (VIII)	vermal IX	0.8854124648042958
167	Pyramus (VIII)	vermal X	0.9292970139702532
167	Pyramus (VIII)	III	0.9073743644203046
167	Pyramus (VIII)	IV	0.8909744096735106
167	Pyramus (VIII)	V	0.8609107503302875
167	Pyramus (VIII)	VI	0.8515107076290831
167	Pyramus (VIII)	crus I	0.8611197737790318
167	Pyramus (VIII)	crus II	0.8412770653194142
167	Pyramus (VIII)	VIIB	0.8559338918973928
167	Pyramus (VIII)	VIIIA	0.8362438068876219
167	Pyramus (VIII)	VIIIB	0.8690203239769662
167	Pyramus (VIII)	IX	0.8527464379468103
167	Pyramus (VIII)	X	0.9215781800020685
167	Pyramus (VIII)	cerebellar nuclei	0.7264410243902525
167	Uvula (IX)	claustrum	0.021470660722930364
167	Uvula (IX)	dentate gyrus	0.16748309549204676
167	Uvula (IX)	CA1 field	0.261693284523333
167	Uvula (IX)	CA2 field	0.17715185639422085
167	Uvula (IX)	CA3 field	0.17478864055898585
167	Uvula (IX)	CA4 field	0.20204231472854822
167	Uvula (IX)	subiculum	0.2462039465318534
167	Uvula (IX)	cingulate gyrus	0.08878540216920024
167	Uvula (IX)	parahippocampal gyrus	0.1465213912028493
167	Uvula (IX)	piriform cortex	0.22385090953507383
167	Uvula (IX)	anterior orbital gyrus	0.07599740240147534
167	Uvula (IX)	frontal operculum	0.0333286756179598
167	Uvula (IX)	frontal pole	0.09447904798923348
167	Uvula (IX)	gyrus rectus	0.06183161741550292
167	Uvula (IX)	inferior frontal gyrus	0.03125807261597663
167	Uvula (IX)	inferior rostral gyrus	0.05963092490706772
167	Uvula (IX)	lateral orbital gyrus	0.07475924000637646
167	Uvula (IX)	medial orbital gyrus	0.061957776256154146
167	Uvula (IX)	middle frontal gyrus	0.046355434756933614
167	Uvula (IX)	paracentral lobule, anterior part	0.01985234888640509
167	Uvula (IX)	paraterminal gyrus	0.32058791927729147
167	Uvula (IX)	parolfactory gyri	0.09567666005284807
167	Uvula (IX)	posterior orbital gyrus	0.05509274351000515
167	Uvula (IX)	precentral gyrus	0.03267484211668174
167	Uvula (IX)	superior frontal gyrus	0.054936072052128485
167	Uvula (IX)	superior rostral gyrus	0.06493721365969175
167	Uvula (IX)	insula	0.045101240752283264
167	Uvula (IX)	cuneus	0.035248870015893205
167	Uvula (IX)	inferior occipital gyrus	0.038938240677235655
167	Uvula (IX)	lingual gyrus	0.0432906102584057
167	Uvula (IX)	occipital pole	0.021792054037582418
167	Uvula (IX)	occipito-temporal gyrus	0.0412397970562308
167	Uvula (IX)	superior occipital gyrus	0.0425210662189842
167	Uvula (IX)	inferior parietal lobule	0.03534101196224406
167	Uvula (IX)	paracentral lobule, posterior part	0.012016869416896241
167	Uvula (IX)	postcentral gyrus	0.024145412969801463
167	Uvula (IX)	precuneus	0.054914260169123257
167	Uvula (IX)	superior parietal lobule	0.04504291082556427
167	Uvula (IX)	fusiform gyrus	0.0515477645153465
167	Uvula (IX)	Heschl's gyrus	0.03976707670342322
167	Uvula (IX)	inferior temporal gyrus	0.04833518787677872
167	Uvula (IX)	middle temporal gyrus	0.0448629882335304
167	Uvula (IX)	planum polare	0.045593813963205734
167	Uvula (IX)	planum temporale	0.07398645487891377
167	Uvula (IX)	superior temporal gyrus	0.033766115940156584
167	Uvula (IX)	temporal pole	0.07625235934865657
167	Uvula (IX)	transverse gyri	0.04954730321763055
167	Uvula (IX)	amygdala	0.35472548893591066
167	Uvula (IX)	globus pallidus	0.7741735642027683
167	Uvula (IX)	caudate nucleus	0.3791529125273965
167	Uvula (IX)	nucleus accumbens	0.38666228965734306
167	Uvula (IX)	putamen	0.4140090883817297
167	Uvula (IX)	septal nuclei	0.5673940239120054
167	Uvula (IX)	substantia innominata	0.5558904979131142
167	Uvula (IX)	epithalamus	0.773368900323628
167	Uvula (IX)	hypothalamus	0.5661764494461103
167	Uvula (IX)	subthalamus	0.7600259686610298
167	Uvula (IX)	thalamus	0.803863218945101
167	Uvula (IX)	inferior colliculus	0.8430455763093461
167	Uvula (IX)	superior colliculus	0.79122411482746835
167	Uvula (IX)	midbrain tegmentum	0.728465052470799
167	Uvula (IX)	pretectal region	0.7935951106418476
167	Uvula (IX)	pons	0.7150341568405527
167	Uvula (IX)	myelencephalon	0.7630966641072289
167	Uvula (IX)	vermal I-II	0.852085785772358
167	Uvula (IX)	vermal III	0.7353704576759968
167	Uvula (IX)	vermal IV	0.6749424928749908
167	Uvula (IX)	vermal V	0.6322042595275439
167	Uvula (IX)	vermal VI	0.6939380349165667
167	Uvula (IX)	vermal VIIAf	0.6567629426087822
167	Uvula (IX)	vermal VIIAt	0.625212481746711
167	Uvula (IX)	vermal VIIB	0.7021756844587289
167	Uvula (IX)	vermal VIIIA	0.6498837170350473
167	Uvula (IX)	vermal VIIIB	0.7575935247050053
167	Uvula (IX)	vermal IX	0.6916791620490753
167	Uvula (IX)	vermal X	0.8909843903625845
167	Uvula (IX)	III	0.7161400744776091
167	Uvula (IX)	IV	0.6768804014608427
167	Uvula (IX)	V	0.629531971237616
167	Uvula (IX)	VI	0.6174595798842974
167	Uvula (IX)	crus I	0.6324000175319545
167	Uvula (IX)	crus II	0.5972536629799747
167	Uvula (IX)	VIIB	0.6252297836364655
167	Uvula (IX)	VIIIA	0.5951710008903276
167	Uvula (IX)	VIIIB	0.6393110780077331
167	Uvula (IX)	IX	0.6023303946944503
167	Uvula (IX)	X	0.7530073065855147
167	Uvula (IX)	cerebellar nuclei	0.784981871947449
167	Nodulus (X)	claustrum	-0.02031451196057121
167	Nodulus (X)	dentate gyrus	0.10748686408818342
167	Nodulus (X)	CA1 field	0.17273475651488052
167	Nodulus (X)	CA2 field	0.09466166615792017
167	Nodulus (X)	CA3 field	0.10364826132876964
167	Nodulus (X)	CA4 field	0.10839902754556684
167	Nodulus (X)	subiculum	0.1618297238538772
167	Nodulus (X)	cingulate gyrus	0.09899675903166277
167	Nodulus (X)	parahippocampal gyrus	0.07465554210169056
167	Nodulus (X)	piriform cortex	0.09824281102783318
167	Nodulus (X)	anterior orbital gyrus	0.10289507328415166
167	Nodulus (X)	frontal operculum	0.051419981897208006
167	Nodulus (X)	frontal pole	0.13978120900472943
167	Nodulus (X)	gyrus rectus	0.051895552415905634
167	Nodulus (X)	inferior frontal gyrus	0.10520969028745437
167	Nodulus (X)	inferior rostral gyrus	0.04739646869618746
167	Nodulus (X)	lateral orbital gyrus	0.1202972666468595
167	Nodulus (X)	medial orbital gyrus	0.06687287353309283
167	Nodulus (X)	middle frontal gyrus	0.12886314135167382
167	Nodulus (X)	paracentral lobule, anterior part	0.1547349761673567
167	Nodulus (X)	paraterminal gyrus	0.25032805247760664
167	Nodulus (X)	parolfactory gyri	0.029965512660777686
167	Nodulus (X)	posterior orbital gyrus	0.0712105509102658
167	Nodulus (X)	precentral gyrus	0.17887423784079595
167	Nodulus (X)	superior frontal gyrus	0.11410237591135326
167	Nodulus (X)	superior rostral gyrus	0.07722064439960254
167	Nodulus (X)	insula	0.034047600405652
167	Nodulus (X)	cuneus	0.19215673738735145
167	Nodulus (X)	inferior occipital gyrus	0.17130929035242295
167	Nodulus (X)	lingual gyrus	0.19316845100846686
167	Nodulus (X)	occipital pole	0.16458644013620535
167	Nodulus (X)	occipito-temporal gyrus	0.14538068373868168
167	Nodulus (X)	superior occipital gyrus	0.18072714984978758
167	Nodulus (X)	inferior parietal lobule	0.13225037397103345
167	Nodulus (X)	paracentral lobule, posterior part	0.13904515504335532
167	Nodulus (X)	postcentral gyrus	0.17489277179928966
167	Nodulus (X)	precuneus	0.160326599323706
167	Nodulus (X)	superior parietal lobule	0.1757129699101007
167	Nodulus (X)	fusiform gyrus	0.03899895054935973
167	Nodulus (X)	Heschl's gyrus	0.15504489437817737
167	Nodulus (X)	inferior temporal gyrus	0.06583608551863726
167	Nodulus (X)	middle temporal gyrus	0.09193639444565752
167	Nodulus (X)	planum polare	0.053622847379589646
167	Nodulus (X)	planum temporale	0.1731408626860002
167	Nodulus (X)	superior temporal gyrus	0.09613002210847368
167	Nodulus (X)	temporal pole	0.020960150593491753
167	Nodulus (X)	transverse gyri	0.16577928986212978
167	Nodulus (X)	amygdala	0.22719465972067027
167	Nodulus (X)	globus pallidus	0.6684396044227889
167	Nodulus (X)	caudate nucleus	0.2819094839041392
167	Nodulus (X)	nucleus accumbens	0.2677302014699551
167	Nodulus (X)	putamen	0.31353838537024387
167	Nodulus (X)	septal nuclei	0.48683502219785735
167	Nodulus (X)	substantia innominata	0.47807664953392465
167	Nodulus (X)	epithalamus	0.7025589504610666
167	Nodulus (X)	hypothalamus	0.5285414187890257
167	Nodulus (X)	subthalamus	0.6936479540123764
167	Nodulus (X)	thalamus	0.7778942963566303
167	Nodulus (X)	inferior colliculus	0.8093045833128368
167	Nodulus (X)	superior colliculus	0.7788539311440066
167	Nodulus (X)	midbrain tegmentum	0.6743284571640414
167	Nodulus (X)	pretectal region	0.7429651790993299
167	Nodulus (X)	pons	0.6659209878281935
167	Nodulus (X)	myelencephalon	0.6890814791694594
167	Nodulus (X)	vermal I-II	0.7654809416489788
167	Nodulus (X)	vermal III	0.6388845569536694
167	Nodulus (X)	vermal IV	0.5734947868437636
167	Nodulus (X)	vermal V	0.5359342440724666
167	Nodulus (X)	vermal VI	0.5741589050063953
167	Nodulus (X)	vermal VIIAf	0.5410265270504063
167	Nodulus (X)	vermal VIIAt	0.5161695434639887
167	Nodulus (X)	vermal VIIB	0.5980163773440136
167	Nodulus (X)	vermal VIIIA	0.5459606062947803
167	Nodulus (X)	vermal VIIIB	0.6577973337598702
167	Nodulus (X)	vermal IX	0.598097985747712
167	Nodulus (X)	vermal X	0.8302986201943235
167	Nodulus (X)	III	0.6134570011049972
167	Nodulus (X)	IV	0.5681977096130943
167	Nodulus (X)	V	0.5273244727783187
167	Nodulus (X)	VI	0.5149392536146352
167	Nodulus (X)	crus I	0.5270527772446614
167	Nodulus (X)	crus II	0.4905995553940352
167	Nodulus (X)	VIIB	0.5219924653591957
167	Nodulus (X)	VIIIA	0.4885927424103909
167	Nodulus (X)	VIIIB	0.522341627914647
167	Nodulus (X)	IX	0.47879662866129774
167	Nodulus (X)	X	0.665990492444873
167	Nodulus (X)	cerebellar nuclei	0.7219485694259546
167	Simple lobule	claustrum	0.08795951387051637
167	Simple lobule	dentate gyrus	0.16513623465427998
167	Simple lobule	CA1 field	0.25904287086052974
167	Simple lobule	CA2 field	0.11804931110573429
167	Simple lobule	CA3 field	0.09833867159601689
167	Simple lobule	CA4 field	0.0981062450832781
167	Simple lobule	subiculum	0.16761556736710911
167	Simple lobule	cingulate gyrus	0.2852976283539317
167	Simple lobule	parahippocampal gyrus	0.21157317687198784
167	Simple lobule	piriform cortex	0.0504542377167655
167	Simple lobule	anterior orbital gyrus	0.2829149368994502
167	Simple lobule	frontal operculum	0.2422659410536292
167	Simple lobule	frontal pole	0.3299611577697814
167	Simple lobule	gyrus rectus	0.2294456376963808
167	Simple lobule	inferior frontal gyrus	0.28165860828512285
167	Simple lobule	inferior rostral gyrus	0.21413251762620264
167	Simple lobule	lateral orbital gyrus	0.30011702569733306
167	Simple lobule	medial orbital gyrus	0.2414109955084041
167	Simple lobule	middle frontal gyrus	0.30058839715115243
167	Simple lobule	paracentral lobule, anterior part	0.27877262875054504
167	Simple lobule	paraterminal gyrus	0.1974039180688256
167	Simple lobule	parolfactory gyri	0.12882029707730736
167	Simple lobule	posterior orbital gyrus	0.256912613182057
167	Simple lobule	precentral gyrus	0.29249966656892945
167	Simple lobule	superior frontal gyrus	0.2999184178086512
167	Simple lobule	superior rostral gyrus	0.24063803250208513
167	Simple lobule	insula	0.2121458509265984
167	Simple lobule	cuneus	0.25980320347762653
167	Simple lobule	inferior occipital gyrus	0.29596128106767033
167	Simple lobule	lingual gyrus	0.27543790641809657
167	Simple lobule	occipital pole	0.27022958387244245
167	Simple lobule	occipito-temporal gyrus	0.3001552079443153
167	Simple lobule	superior occipital gyrus	0.29481248822649475
167	Simple lobule	inferior parietal lobule	0.2989801822943991
167	Simple lobule	paracentral lobule, posterior part	0.2628335017318881
167	Simple lobule	postcentral gyrus	0.27511405003415057
167	Simple lobule	precuneus	0.3185271928091037
167	Simple lobule	superior parietal lobule	0.315083526709507
167	Simple lobule	fusiform gyrus	0.21702199906135025
167	Simple lobule	Heschl's gyrus	0.29539087983666645
167	Simple lobule	inferior temporal gyrus	0.253274123848325
167	Simple lobule	middle temporal gyrus	0.28269930175672675
167	Simple lobule	planum polare	0.22625834932090236
167	Simple lobule	planum temporale	0.333952493857968
167	Simple lobule	superior temporal gyrus	0.2767522148937648
167	Simple lobule	temporal pole	0.17631517514356132
167	Simple lobule	transverse gyri	0.3145014477982656
167	Simple lobule	amygdala	0.06994629908296102
167	Simple lobule	globus pallidus	0.5156741529737568
167	Simple lobule	caudate nucleus	0.2513843954163481
167	Simple lobule	nucleus accumbens	0.16023872588849608
167	Simple lobule	putamen	0.27669566135892887
167	Simple lobule	septal nuclei	0.12311689472133341
167	Simple lobule	substantia innominata	0.06557403122165457
167	Simple lobule	epithalamus	0.317893113129704
167	Simple lobule	hypothalamus	0.044841491868798045
167	Simple lobule	subthalamus	0.4251176384955314
167	Simple lobule	thalamus	0.4965812606835242
167	Simple lobule	inferior colliculus	0.45698929157958634
167	Simple lobule	superior colliculus	0.39578334262259535
167	Simple lobule	midbrain tegmentum	0.29106595064235347
167	Simple lobule	pretectal region	0.3803623106902762
167	Simple lobule	pons	0.3722094080104556
167	Simple lobule	myelencephalon	0.4031628749898066
167	Simple lobule	vermal I-II	0.7071748220929551
167	Simple lobule	vermal III	0.7241799829970799
167	Simple lobule	vermal IV	0.7071377940316252
167	Simple lobule	vermal V	0.7119274601276722
167	Simple lobule	vermal VI	0.6670719898988675
167	Simple lobule	vermal VIIAf	0.6723867311790261
167	Simple lobule	vermal VIIAt	0.6928175824769393
167	Simple lobule	vermal VIIB	0.6863090846465602
167	Simple lobule	vermal VIIIA	0.6858595837140755
167	Simple lobule	vermal VIIIB	0.6813185106447774
167	Simple lobule	vermal IX	0.6744858433528976
167	Simple lobule	vermal X	0.6008397589108394
167	Simple lobule	III	0.7717125388864605
167	Simple lobule	IV	0.7357952292534492
167	Simple lobule	V	0.7163628496521711
167	Simple lobule	VI	0.6956994189720943
167	Simple lobule	crus I	0.6809580798424731
167	Simple lobule	crus II	0.6767567020059808
167	Simple lobule	VIIB	0.6911240746392443
167	Simple lobule	VIIIA	0.6822821869376832
167	Simple lobule	VIIIB	0.6784895436290812
167	Simple lobule	IX	0.6874211687973146
167	Simple lobule	X	0.70353598581896
167	Simple lobule	cerebellar nuclei	0.4886078681726437
167	Crus 1	claustrum	0.0954768592668628
167	Crus 1	dentate gyrus	0.1538775262710672
167	Crus 1	CA1 field	0.23289936816654638
167	Crus 1	CA2 field	0.17337395609670583
167	Crus 1	CA3 field	0.1565542136672002
167	Crus 1	CA4 field	0.17091327324956063
167	Crus 1	subiculum	0.14852456007757175
167	Crus 1	cingulate gyrus	0.2151604396153112
167	Crus 1	parahippocampal gyrus	0.21558103571115259
167	Crus 1	piriform cortex	0.07371028015291442
167	Crus 1	anterior orbital gyrus	0.1975732126294766
167	Crus 1	frontal operculum	0.19176527599698473
167	Crus 1	frontal pole	0.22543715884770957
167	Crus 1	gyrus rectus	0.1929439304321852
167	Crus 1	inferior frontal gyrus	0.17803356344372182
167	Crus 1	inferior rostral gyrus	0.19709317022004952
167	Crus 1	lateral orbital gyrus	0.19728076022114066
167	Crus 1	medial orbital gyrus	0.1903548415534361
167	Crus 1	middle frontal gyrus	0.18848016805550868
167	Crus 1	paracentral lobule, anterior part	0.12533816314183022
167	Crus 1	paraterminal gyrus	0.14800367082530821
167	Crus 1	parolfactory gyri	0.14099073556740355
167	Crus 1	posterior orbital gyrus	0.18413968257048613
167	Crus 1	precentral gyrus	0.13184609598586863
167	Crus 1	superior frontal gyrus	0.20287269261524996
167	Crus 1	superior rostral gyrus	0.18571841278832066
167	Crus 1	insula	0.19046911691005888
167	Crus 1	cuneus	0.08306091573838106
167	Crus 1	inferior occipital gyrus	0.13273638906473254
167	Crus 1	lingual gyrus	0.10517379137764638
167	Crus 1	occipital pole	0.11612258519062137
167	Crus 1	occipito-temporal gyrus	0.16216257243283627
167	Crus 1	superior occipital gyrus	0.11960273792595112
167	Crus 1	inferior parietal lobule	0.1780596173390284
167	Crus 1	paracentral lobule, posterior part	0.13821790270726383
167	Crus 1	postcentral gyrus	0.10588824148352792
167	Crus 1	precuneus	0.1774064276447027
167	Crus 1	superior parietal lobule	0.15462635996668506
167	Crus 1	fusiform gyrus	0.1970204361365852
167	Crus 1	Heschl's gyrus	0.1419806321790637
167	Crus 1	inferior temporal gyrus	0.20458554674265064
167	Crus 1	middle temporal gyrus	0.20269356838858238
167	Crus 1	planum polare	0.17498632735691527
167	Crus 1	planum temporale	0.19208834477143702
167	Crus 1	superior temporal gyrus	0.18312104827759942
167	Crus 1	temporal pole	0.19558221367056103
167	Crus 1	transverse gyri	0.1560867260147888
167	Crus 1	amygdala	0.0558489410767883
167	Crus 1	globus pallidus	0.4694328793858738
167	Crus 1	caudate nucleus	0.0707590529119772
167	Crus 1	nucleus accumbens	0.024063828318367873
167	Crus 1	putamen	0.0921966924136346
167	Crus 1	septal nuclei	0.07616194489158433
167	Crus 1	substantia innominata	0.03158903294205188
167	Crus 1	epithalamus	0.3463702331247412
167	Crus 1	hypothalamus	0.05358194986367494
167	Crus 1	subthalamus	0.3872370999561527
167	Crus 1	thalamus	0.4232888440964589
167	Crus 1	inferior colliculus	0.3612348690723265
167	Crus 1	superior colliculus	0.3232361819448774
167	Crus 1	midbrain tegmentum	0.2872441546854044
167	Crus 1	pretectal region	0.3453557441492328
167	Crus 1	pons	0.3660430502740164
167	Crus 1	myelencephalon	0.42114362191904264
167	Crus 1	vermal I-II	0.8118932306166803
167	Crus 1	vermal III	0.8816153225514196
167	Crus 1	vermal IV	0.8846464673687974
167	Crus 1	vermal V	0.8910114943520503
167	Crus 1	vermal VI	0.8599678256374761
167	Crus 1	vermal VIIAf	0.8660796236780534
167	Crus 1	vermal VIIAt	0.8826572066295961
167	Crus 1	vermal VIIB	0.8679735977129001
167	Crus 1	vermal VIIIA	0.875962657865182
167	Crus 1	vermal VIIIB	0.8479745022107206
167	Crus 1	vermal IX	0.8610746091182733
167	Crus 1	vermal X	0.7050770091513668
167	Crus 1	III	0.902054062013495
167	Crus 1	IV	0.9032239434001491
167	Crus 1	V	0.8982682940511757
167	Crus 1	VI	0.887847977601232
167	Crus 1	crus I	0.8785081790152299
167	Crus 1	crus II	0.8805071833443592
167	Crus 1	VIIB	0.8847856755226267
167	Crus 1	VIIIA	0.883797546704078
167	Crus 1	VIIIB	0.879602688676032
167	Crus 1	IX	0.8892871714180977
167	Crus 1	X	0.8674870589240086
167	Crus 1	cerebellar nuclei	0.46354923098806383
167	Crus 2	claustrum	0.09857586835787534
167	Crus 2	dentate gyrus	0.11797251026262835
167	Crus 2	CA1 field	0.13813344060857943
167	Crus 2	CA2 field	0.17691611582818254
167	Crus 2	CA3 field	0.17111065925040572
167	Crus 2	CA4 field	0.18639906404185608
167	Crus 2	subiculum	0.05933290462323228
167	Crus 2	cingulate gyrus	0.1323664560763043
167	Crus 2	parahippocampal gyrus	0.156885355202243
167	Crus 2	piriform cortex	0.03761301967539686
167	Crus 2	anterior orbital gyrus	0.11451265070528778
167	Crus 2	frontal operculum	0.14858667551665106
167	Crus 2	frontal pole	0.1199380379353503
167	Crus 2	gyrus rectus	0.13532948442680381
167	Crus 2	inferior frontal gyrus	0.11492452798774767
167	Crus 2	inferior rostral gyrus	0.1550561529749497
167	Crus 2	lateral orbital gyrus	0.11338019432581815
167	Crus 2	medial orbital gyrus	0.1293340976193014
167	Crus 2	middle frontal gyrus	0.1125724295241641
167	Crus 2	paracentral lobule, anterior part	0.05242814422005287
167	Crus 2	paraterminal gyrus	0.0360020768003741
167	Crus 2	parolfactory gyri	0.10261891152915045
167	Crus 2	posterior orbital gyrus	0.11884783011657175
167	Crus 2	precentral gyrus	0.05234545402954791
167	Crus 2	superior frontal gyrus	0.12594742969782108
167	Crus 2	superior rostral gyrus	0.12009584234170045
167	Crus 2	insula	0.15549430897506525
167	Crus 2	cuneus	0.011787553682174491
167	Crus 2	inferior occipital gyrus	0.05511884272849286
167	Crus 2	lingual gyrus	0.033989511218423925
167	Crus 2	occipital pole	0.0560031497055805
167	Crus 2	occipito-temporal gyrus	0.0909428121182564
167	Crus 2	superior occipital gyrus	0.031266709279561745
167	Crus 2	inferior parietal lobule	0.11117928105598322
167	Crus 2	paracentral lobule, posterior part	0.09024434789288074
167	Crus 2	postcentral gyrus	0.031922839898165814
167	Crus 2	precuneus	0.09439148469722855
167	Crus 2	superior parietal lobule	0.06864294433614776
167	Crus 2	fusiform gyrus	0.16399183709719284
167	Crus 2	Heschl's gyrus	0.06433007448937154
167	Crus 2	inferior temporal gyrus	0.15899512671223112
167	Crus 2	middle temporal gyrus	0.14567748482937334
167	Crus 2	planum polare	0.13129868664682587
167	Crus 2	planum temporale	0.10108037796628289
167	Crus 2	superior temporal gyrus	0.12486711543842312
167	Crus 2	temporal pole	0.16798285124847026
167	Crus 2	transverse gyri	0.07099235704313069
167	Crus 2	amygdala	-0.005364757901801399
167	Crus 2	globus pallidus	0.406803101745223
167	Crus 2	caudate nucleus	-0.04459842615675149
167	Crus 2	nucleus accumbens	-0.07685476989357068
167	Crus 2	putamen	-0.025713068088726115
167	Crus 2	septal nuclei	-0.0028251377500810803
167	Crus 2	substantia innominata	-0.008521137871048409
167	Crus 2	epithalamus	0.3321482445265849
167	Crus 2	hypothalamus	0.044243510254879645
167	Crus 2	subthalamus	0.3493203896102345
167	Crus 2	thalamus	0.3590173934027295
167	Crus 2	inferior colliculus	0.2830693391029609
167	Crus 2	superior colliculus	0.24660979788708604
167	Crus 2	midbrain tegmentum	0.2673955533434187
167	Crus 2	pretectal region	0.2932543042243945
167	Crus 2	pons	0.35708925739120495
167	Crus 2	myelencephalon	0.42168524615258474
167	Crus 2	vermal I-II	0.8172609916407995
167	Crus 2	vermal III	0.9020183769261257
167	Crus 2	vermal IV	0.9228618784127111
167	Crus 2	vermal V	0.9355763937620917
167	Crus 2	vermal VI	0.9198850644390832
167	Crus 2	vermal VIIAf	0.9257120978003128
167	Crus 2	vermal VIIAt	0.9313722781659419
167	Crus 2	vermal VIIB	0.9139634456672291
167	Crus 2	vermal VIIIA	0.9257694816166386
167	Crus 2	vermal VIIIB	0.882543969908099
167	Crus 2	vermal IX	0.9108998812487092
167	Crus 2	vermal X	0.7070531320234122
167	Crus 2	III	0.9148936103657348
167	Crus 2	IV	0.9373237544851414
167	Crus 2	V	0.9443230205597423
167	Crus 2	VI	0.9415082189071521
167	Crus 2	crus I	0.9362009205753979
167	Crus 2	crus II	0.9470289705836029
167	Crus 2	VIIB	0.9400040728002292
167	Crus 2	VIIIA	0.9417717226446397
167	Crus 2	VIIIB	0.9422546368995841
167	Crus 2	IX	0.9572286892044835
167	Crus 2	X	0.8974556359568865
167	Crus 2	cerebellar nuclei	0.4309685384721681
167	Paramedian lobule	claustrum	0.11763528321057448
167	Paramedian lobule	dentate gyrus	0.08868176549135692
167	Paramedian lobule	CA1 field	0.11361008082503428
167	Paramedian lobule	CA2 field	0.14438677705358968
167	Paramedian lobule	CA3 field	0.1354480865187211
167	Paramedian lobule	CA4 field	0.14021565807764722
167	Paramedian lobule	subiculum	0.05696880544206318
167	Paramedian lobule	cingulate gyrus	0.13533378611655808
167	Paramedian lobule	parahippocampal gyrus	0.14991387491889366
167	Paramedian lobule	piriform cortex	0.0500614755152682
167	Paramedian lobule	anterior orbital gyrus	0.1167571270302256
167	Paramedian lobule	frontal operculum	0.14996403150848236
167	Paramedian lobule	frontal pole	0.12681174816863158
167	Paramedian lobule	gyrus rectus	0.13419716164462483
167	Paramedian lobule	inferior frontal gyrus	0.11924991157793116
167	Paramedian lobule	inferior rostral gyrus	0.1550568974057557
167	Paramedian lobule	lateral orbital gyrus	0.11949351321290615
167	Paramedian lobule	medial orbital gyrus	0.1324591667339893
167	Paramedian lobule	middle frontal gyrus	0.1185806797011545
167	Paramedian lobule	paracentral lobule, anterior part	0.062022716136345246
167	Paramedian lobule	paraterminal gyrus	0.051997170207731966
167	Paramedian lobule	parolfactory gyri	0.10043143211291126
167	Paramedian lobule	posterior orbital gyrus	0.12450419635629774
167	Paramedian lobule	precentral gyrus	0.05955730016358918
167	Paramedian lobule	superior frontal gyrus	0.12936211979444404
167	Paramedian lobule	superior rostral gyrus	0.12124561654651216
167	Paramedian lobule	insula	0.1509396164061842
167	Paramedian lobule	cuneus	0.01820475684398816
167	Paramedian lobule	inferior occipital gyrus	0.06031186933332057
167	Paramedian lobule	lingual gyrus	0.04000367250310271
167	Paramedian lobule	occipital pole	0.055341802526625565
167	Paramedian lobule	occipito-temporal gyrus	0.09445973838865102
167	Paramedian lobule	superior occipital gyrus	0.03902602024195593
167	Paramedian lobule	inferior parietal lobule	0.11418717942544074
167	Paramedian lobule	paracentral lobule, posterior part	0.09690937055597078
167	Paramedian lobule	postcentral gyrus	0.03646257502666053
167	Paramedian lobule	precuneus	0.10142901040282708
167	Paramedian lobule	superior parietal lobule	0.07327241921070154
167	Paramedian lobule	fusiform gyrus	0.15775320143967267
167	Paramedian lobule	Heschl's gyrus	0.06933729247689524
167	Paramedian lobule	inferior temporal gyrus	0.1587824489983785
167	Paramedian lobule	middle temporal gyrus	0.14718695960748232
167	Paramedian lobule	planum polare	0.12849909158110717
167	Paramedian lobule	planum temporale	0.10874280096218115
167	Paramedian lobule	superior temporal gyrus	0.12695616352666808
167	Paramedian lobule	temporal pole	0.15578587025794885
167	Paramedian lobule	transverse gyri	0.07152163704236401
167	Paramedian lobule	amygdala	0.006248251435035423
167	Paramedian lobule	globus pallidus	0.5107319091706783
167	Paramedian lobule	caudate nucleus	-0.05137745800431322
167	Paramedian lobule	nucleus accumbens	-0.07192596090990298
167	Paramedian lobule	putamen	-0.0258345935377467
167	Paramedian lobule	septal nuclei	0.0704263574099624
167	Paramedian lobule	substantia innominata	0.07982859393201622
167	Paramedian lobule	epithalamus	0.47428560397416736
167	Paramedian lobule	hypothalamus	0.16318522208330904
167	Paramedian lobule	subthalamus	0.4756086242634013
167	Paramedian lobule	thalamus	0.4863627219071564
167	Paramedian lobule	inferior colliculus	0.4264894471574177
167	Paramedian lobule	superior colliculus	0.3808333196930553
167	Paramedian lobule	midbrain tegmentum	0.4074287990329456
167	Paramedian lobule	pretectal region	0.4297443541766849
167	Paramedian lobule	pons	0.4911333427728865
167	Paramedian lobule	myelencephalon	0.5551194066406236
167	Paramedian lobule	vermal I-II	0.8730616676757021
167	Paramedian lobule	vermal III	0.8979464423852831
167	Paramedian lobule	vermal IV	0.9041166480542758
167	Paramedian lobule	vermal V	0.9049072571458052
167	Paramedian lobule	vermal VI	0.9180935894976372
167	Paramedian lobule	vermal VIIAf	0.9122644511963152
167	Paramedian lobule	vermal VIIAt	0.8987949293693358
167	Paramedian lobule	vermal VIIB	0.9082786141744594
167	Paramedian lobule	vermal VIIIA	0.9060708964121714
167	Paramedian lobule	vermal VIIIB	0.8953647098313758
167	Paramedian lobule	vermal IX	0.9049242251114428
167	Paramedian lobule	vermal X	0.794791024914898
167	Paramedian lobule	III	0.9012815076723872
167	Paramedian lobule	IV	0.9172473657524814
167	Paramedian lobule	V	0.9145420723251445
167	Paramedian lobule	VI	0.9111894286250439
167	Paramedian lobule	crus I	0.9136323332723033
167	Paramedian lobule	crus II	0.917137615609568
167	Paramedian lobule	VIIB	0.9125260865993741
167	Paramedian lobule	VIIIA	0.9041931177376518
167	Paramedian lobule	VIIIB	0.9199440463258491
167	Paramedian lobule	IX	0.9293931417182355
167	Paramedian lobule	X	0.9112177678124598
167	Paramedian lobule	cerebellar nuclei	0.5572330882924836
167	Copula pyramidis	claustrum	0.05685995127964087
167	Copula pyramidis	dentate gyrus	0.12051605707274948
167	Copula pyramidis	CA1 field	0.1424190047397745
167	Copula pyramidis	CA2 field	0.16756292173297
167	Copula pyramidis	CA3 field	0.1715515509159321
167	Copula pyramidis	CA4 field	0.18487299595844958
167	Copula pyramidis	subiculum	0.08478678528326258
167	Copula pyramidis	cingulate gyrus	0.08992961854717496
167	Copula pyramidis	parahippocampal gyrus	0.11358267199253341
167	Copula pyramidis	piriform cortex	0.07151707949583469
167	Copula pyramidis	anterior orbital gyrus	0.07655270015739658
167	Copula pyramidis	frontal operculum	0.09289063012972089
167	Copula pyramidis	frontal pole	0.08617555484893763
167	Copula pyramidis	gyrus rectus	0.0810916568648967
167	Copula pyramidis	inferior frontal gyrus	0.08061664747445219
167	Copula pyramidis	inferior rostral gyrus	0.09890020966831607
167	Copula pyramidis	lateral orbital gyrus	0.08326271688218281
167	Copula pyramidis	medial orbital gyrus	0.08141023370120423
167	Copula pyramidis	middle frontal gyrus	0.08336120523160262
167	Copula pyramidis	paracentral lobule, anterior part	0.054578352995856935
167	Copula pyramidis	paraterminal gyrus	0.10371278882564355
167	Copula pyramidis	parolfactory gyri	0.06369868235603275
167	Copula pyramidis	posterior orbital gyrus	0.07396261785340134
167	Copula pyramidis	precentral gyrus	0.06000910196872668
167	Copula pyramidis	superior frontal gyrus	0.08766281009225016
167	Copula pyramidis	superior rostral gyrus	0.07718522801396537
167	Copula pyramidis	insula	0.09629793081569661
167	Copula pyramidis	cuneus	0.0444499731923131
167	Copula pyramidis	inferior occipital gyrus	0.06245105964553049
167	Copula pyramidis	lingual gyrus	0.061249178933298655
167	Copula pyramidis	occipital pole	0.06616531722449616
167	Copula pyramidis	occipito-temporal gyrus	0.07861851907975784
167	Copula pyramidis	superior occipital gyrus	0.04614278343394837
167	Copula pyramidis	inferior parietal lobule	0.08740704515871779
167	Copula pyramidis	paracentral lobule, posterior part	0.08113730235725052
167	Copula pyramidis	postcentral gyrus	0.04753746179785591
167	Copula pyramidis	precuneus	0.08293964363145
167	Copula pyramidis	superior parietal lobule	0.06862369529553008
167	Copula pyramidis	fusiform gyrus	0.10471260048880415
167	Copula pyramidis	Heschl's gyrus	0.06313146288648602
167	Copula pyramidis	inferior temporal gyrus	0.1059248191337271
167	Copula pyramidis	middle temporal gyrus	0.10144334531420343
167	Copula pyramidis	planum polare	0.08396280384250186
167	Copula pyramidis	planum temporale	0.09212560597512845
167	Copula pyramidis	superior temporal gyrus	0.08658424972019477
167	Copula pyramidis	temporal pole	0.10594355088730996
167	Copula pyramidis	transverse gyri	0.06789292201088686
167	Copula pyramidis	amygdala	0.0980814699556163
167	Copula pyramidis	globus pallidus	0.6408591648810156
167	Copula pyramidis	caudate nucleus	0.07847479620450562
167	Copula pyramidis	nucleus accumbens	0.06008088223469553
167	Copula pyramidis	putamen	0.10921267515891292
167	Copula pyramidis	septal nuclei	0.24405707406801888
167	Copula pyramidis	substantia innominata	0.25999314524305206
167	Copula pyramidis	epithalamus	0.6298119792018156
167	Copula pyramidis	hypothalamus	0.33096419598421317
167	Copula pyramidis	subthalamus	0.6238392719467738
167	Copula pyramidis	thalamus	0.6528685836630235
167	Copula pyramidis	inferior colliculus	0.6146048597369428
167	Copula pyramidis	superior colliculus	0.568054373771929
167	Copula pyramidis	midbrain tegmentum	0.5667816738335937
167	Copula pyramidis	pretectal region	0.6011415157476596
167	Copula pyramidis	pons	0.6257233290073383
167	Copula pyramidis	myelencephalon	0.6884796606444971
167	Copula pyramidis	vermal I-II	0.9535277380394317
167	Copula pyramidis	vermal III	0.9300226955656367
167	Copula pyramidis	vermal IV	0.9131913638124343
167	Copula pyramidis	vermal V	0.9002381613880776
167	Copula pyramidis	vermal VI	0.9304590144682717
167	Copula pyramidis	vermal VIIAf	0.9107057344841949
167	Copula pyramidis	vermal VIIAt	0.8885720426498758
167	Copula pyramidis	vermal VIIB	0.9274683915477927
167	Copula pyramidis	vermal VIIIA	0.9044942951250784
167	Copula pyramidis	vermal VIIIB	0.9377618394046746
167	Copula pyramidis	vermal IX	0.9242779241847462
167	Copula pyramidis	vermal X	0.9159360340935916
167	Copula pyramidis	III	0.9199154940390682
167	Copula pyramidis	IV	0.9197652609794639
167	Copula pyramidis	V	0.9034555289300016
167	Copula pyramidis	VI	0.8981256814449258
167	Copula pyramidis	crus I	0.9051505100264706
167	Copula pyramidis	crus II	0.89544407677252
167	Copula pyramidis	VIIB	0.902647911404684
167	Copula pyramidis	VIIIA	0.8839976949785795
167	Copula pyramidis	VIIIB	0.9122065502561693
167	Copula pyramidis	IX	0.900132289500974
167	Copula pyramidis	X	0.9499857206455252
167	Copula pyramidis	cerebellar nuclei	0.6954736944783528
167	Flocculus	claustrum	0.1741067576738638
167	Flocculus	dentate gyrus	0.11744816076775466
167	Flocculus	CA1 field	0.22131134079277934
167	Flocculus	CA2 field	0.15215362032102492
167	Flocculus	CA3 field	0.12501722097624343
167	Flocculus	CA4 field	0.114223007024409
167	Flocculus	subiculum	0.22220544603911888
167	Flocculus	cingulate gyrus	0.2579238120268461
167	Flocculus	parahippocampal gyrus	0.260716957205529
167	Flocculus	piriform cortex	0.21381566716948036
167	Flocculus	anterior orbital gyrus	0.23931109541556497
167	Flocculus	frontal operculum	0.21650201530195218
167	Flocculus	frontal pole	0.2810259844677135
167	Flocculus	gyrus rectus	0.22593546903079895
167	Flocculus	inferior frontal gyrus	0.20319321222071884
167	Flocculus	inferior rostral gyrus	0.23395005137733932
167	Flocculus	lateral orbital gyrus	0.24790836513190853
167	Flocculus	medial orbital gyrus	0.2350543775843825
167	Flocculus	middle frontal gyrus	0.21843144667567863
167	Flocculus	paracentral lobule, anterior part	0.14126147496666386
167	Flocculus	paraterminal gyrus	0.2858597636254182
167	Flocculus	parolfactory gyri	0.19117049015074994
167	Flocculus	posterior orbital gyrus	0.23449379253242367
167	Flocculus	precentral gyrus	0.13959082850892043
167	Flocculus	superior frontal gyrus	0.2298906831026597
167	Flocculus	superior rostral gyrus	0.22419703809409405
167	Flocculus	insula	0.20871311950095683
167	Flocculus	cuneus	0.10251110933687349
167	Flocculus	inferior occipital gyrus	0.14862346654215014
167	Flocculus	lingual gyrus	0.12457850346789531
167	Flocculus	occipital pole	0.1122480932831062
167	Flocculus	occipito-temporal gyrus	0.17693462576199967
167	Flocculus	superior occipital gyrus	0.14662234792191833
167	Flocculus	inferior parietal lobule	0.19127802587715514
167	Flocculus	paracentral lobule, posterior part	0.15790876974608464
167	Flocculus	postcentral gyrus	0.11123658719643331
167	Flocculus	precuneus	0.20330566868389222
167	Flocculus	superior parietal lobule	0.16696209717626256
167	Flocculus	fusiform gyrus	0.20892810713640653
167	Flocculus	Heschl's gyrus	0.1653629457462121
167	Flocculus	inferior temporal gyrus	0.2300808631066643
167	Flocculus	middle temporal gyrus	0.22492544799679498
167	Flocculus	planum polare	0.19600013000390026
167	Flocculus	planum temporale	0.2253095817336807
167	Flocculus	superior temporal gyrus	0.20381580739142305
167	Flocculus	temporal pole	0.19945937012112688
167	Flocculus	transverse gyri	0.16536142765875872
167	Flocculus	amygdala	0.2019105896134664
167	Flocculus	globus pallidus	0.7325872940565212
167	Flocculus	caudate nucleus	0.04644404162520076
167	Flocculus	nucleus accumbens	0.08015793537943729
167	Flocculus	putamen	0.0704508624298927
167	Flocculus	septal nuclei	0.365389901176736
167	Flocculus	substantia innominata	0.37212977679014003
167	Flocculus	epithalamus	0.7627191396092644
167	Flocculus	hypothalamus	0.5025957354882089
167	Flocculus	subthalamus	0.7367953570708321
167	Flocculus	thalamus	0.7299108684385749
167	Flocculus	inferior colliculus	0.7388910659568416
167	Flocculus	superior colliculus	0.7093764103324794
167	Flocculus	midbrain tegmentum	0.7233542643137866
167	Flocculus	pretectal region	0.735737439525587
167	Flocculus	pons	0.7671694599679194
167	Flocculus	myelencephalon	0.796698018505276
167	Flocculus	vermal I-II	0.8055304659542445
167	Flocculus	vermal III	0.6817201849578952
167	Flocculus	vermal IV	0.6352899036013041
167	Flocculus	vermal V	0.5985397534069827
167	Flocculus	vermal VI	0.6629044627960501
167	Flocculus	vermal VIIAf	0.6356061859015096
167	Flocculus	vermal VIIAt	0.5844010826033573
167	Flocculus	vermal VIIB	0.6471488522297768
167	Flocculus	vermal VIIIA	0.6191131162605625
167	Flocculus	vermal VIIIB	0.6980519385311431
167	Flocculus	vermal IX	0.6425617282291556
167	Flocculus	vermal X	0.8286714177944222
167	Flocculus	III	0.6590874800568699
167	Flocculus	IV	0.6408696053504397
167	Flocculus	V	0.6051527557445932
167	Flocculus	VI	0.5945245830788307
167	Flocculus	crus I	0.6082554591652404
167	Flocculus	crus II	0.5873873447723722
167	Flocculus	VIIB	0.5991115929257541
167	Flocculus	VIIIA	0.5717754930300014
167	Flocculus	VIIIB	0.612357345641394
167	Flocculus	IX	0.6023036047860587
167	Flocculus	X	0.73105881742924
167	Flocculus	cerebellar nuclei	0.7881993018835887
167	Paraflocculus	claustrum	0.2792487446932427
167	Paraflocculus	dentate gyrus	0.17005490239828872
167	Paraflocculus	CA1 field	0.2868524530680541
167	Paraflocculus	CA2 field	0.18400322025619015
167	Paraflocculus	CA3 field	0.14332520714436559
167	Paraflocculus	CA4 field	0.15535609209065884
167	Paraflocculus	subiculum	0.3146939138281913
167	Paraflocculus	cingulate gyrus	0.2895133772800427
167	Paraflocculus	parahippocampal gyrus	0.3793770695276163
167	Paraflocculus	piriform cortex	0.41191499055719505
167	Paraflocculus	anterior orbital gyrus	0.2593751549868028
167	Paraflocculus	frontal operculum	0.22461464158564756
167	Paraflocculus	frontal pole	0.2990678094344935
167	Paraflocculus	gyrus rectus	0.28244627460154353
167	Paraflocculus	inferior frontal gyrus	0.14935162881100156
167	Paraflocculus	inferior rostral gyrus	0.2908269159293162
167	Paraflocculus	lateral orbital gyrus	0.2490393366773047
167	Paraflocculus	medial orbital gyrus	0.2772897616833494
167	Paraflocculus	middle frontal gyrus	0.15678378263412107
167	Paraflocculus	paracentral lobule, anterior part	9.760792359359498e-4
167	Paraflocculus	paraterminal gyrus	0.4295893104033888
167	Paraflocculus	parolfactory gyri	0.31491800513157975
167	Paraflocculus	posterior orbital gyrus	0.2641551276814273
167	Paraflocculus	precentral gyrus	-0.017483667291397744
167	Paraflocculus	superior frontal gyrus	0.19514172631944152
167	Paraflocculus	superior rostral gyrus	0.262540906238786
167	Paraflocculus	insula	0.2544458933818578
167	Paraflocculus	cuneus	-0.03826393989879639
167	Paraflocculus	inferior occipital gyrus	0.027721681754638
167	Paraflocculus	lingual gyrus	-0.004885087860698335
167	Paraflocculus	occipital pole	-0.018313586729269936
167	Paraflocculus	occipito-temporal gyrus	0.08629002146223229
167	Paraflocculus	superior occipital gyrus	0.027927415785255573
167	Paraflocculus	inferior parietal lobule	0.10549228443750265
167	Paraflocculus	paracentral lobule, posterior part	0.029090626022741716
167	Paraflocculus	postcentral gyrus	-0.0386385997492016
167	Paraflocculus	precuneus	0.11514245885544318
167	Paraflocculus	superior parietal lobule	0.045125681083030236
167	Paraflocculus	fusiform gyrus	0.2458156180195981
167	Paraflocculus	Heschl's gyrus	0.06875647832288344
167	Paraflocculus	inferior temporal gyrus	0.24097079715441042
167	Paraflocculus	middle temporal gyrus	0.20061287373315226
167	Paraflocculus	planum polare	0.21670306366406872
167	Paraflocculus	planum temporale	0.15002600449457432
167	Paraflocculus	superior temporal gyrus	0.16004995711742076
167	Paraflocculus	temporal pole	0.28747683454384065
167	Paraflocculus	transverse gyri	0.06892395474222013
167	Paraflocculus	amygdala	0.3634288456145597
167	Paraflocculus	globus pallidus	0.6527486096635614
167	Paraflocculus	caudate nucleus	0.079301486069549
167	Paraflocculus	nucleus accumbens	0.16175356613121591
167	Paraflocculus	putamen	0.10239094241206097
167	Paraflocculus	septal nuclei	0.4497591199089838
167	Paraflocculus	substantia innominata	0.40535382503376405
167	Paraflocculus	epithalamus	0.7295676712053061
167	Paraflocculus	hypothalamus	0.49023073645577986
167	Paraflocculus	subthalamus	0.5919559214552187
167	Paraflocculus	thalamus	0.5703082335690062
167	Paraflocculus	inferior colliculus	0.5894922658778291
167	Paraflocculus	superior colliculus	0.5547005189581753
167	Paraflocculus	midbrain tegmentum	0.6161137678397502
167	Paraflocculus	pretectal region	0.6230198086907028
167	Paraflocculus	pons	0.5992829457076702
167	Paraflocculus	myelencephalon	0.6611341875116883
167	Paraflocculus	vermal I-II	0.742466753523981
167	Paraflocculus	vermal III	0.671952666083639
167	Paraflocculus	vermal IV	0.6359447971658316
167	Paraflocculus	vermal V	0.5872540034155411
167	Paraflocculus	vermal VI	0.6714200289021033
167	Paraflocculus	vermal VIIAf	0.6541370073845841
167	Paraflocculus	vermal VIIAt	0.6048794611561042
167	Paraflocculus	vermal VIIB	0.6451629442882425
167	Paraflocculus	vermal VIIIA	0.6308701909045464
167	Paraflocculus	vermal VIIIB	0.6900399097047603
167	Paraflocculus	vermal IX	0.6313660859257879
167	Paraflocculus	vermal X	0.7751692453057056
167	Paraflocculus	III	0.629526196724653
167	Paraflocculus	IV	0.6318163181843545
167	Paraflocculus	V	0.5951551626779451
167	Paraflocculus	VI	0.5931356970393237
167	Paraflocculus	crus I	0.6139449165879862
167	Paraflocculus	crus II	0.592337026759959
167	Paraflocculus	VIIB	0.5983763695332219
167	Paraflocculus	VIIIA	0.5858382013956484
167	Paraflocculus	VIIIB	0.6200868207583551
167	Paraflocculus	IX	0.6179310103644298
167	Paraflocculus	X	0.7009377403229656
167	Paraflocculus	cerebellar nuclei	0.6284004676910395
167	Cerebellar nuclei	claustrum	-0.1009209624641308
167	Cerebellar nuclei	dentate gyrus	0.10653964752048539
167	Cerebellar nuclei	CA1 field	0.1494819985403735
167	Cerebellar nuclei	CA2 field	0.17871960647479782
167	Cerebellar nuclei	CA3 field	0.19090971133732873
167	Cerebellar nuclei	CA4 field	0.18565334334609632
167	Cerebellar nuclei	subiculum	0.08878117009499889
167	Cerebellar nuclei	cingulate gyrus	0.013079676979185172
167	Cerebellar nuclei	parahippocampal gyrus	-0.014705372012488897
167	Cerebellar nuclei	piriform cortex	-0.05153330019158671
167	Cerebellar nuclei	anterior orbital gyrus	0.01548212770111813
167	Cerebellar nuclei	frontal operculum	0.01579326192941982
167	Cerebellar nuclei	frontal pole	0.019411357765675215
167	Cerebellar nuclei	gyrus rectus	-0.021950703741331856
167	Cerebellar nuclei	inferior frontal gyrus	0.07395980718049674
167	Cerebellar nuclei	inferior rostral gyrus	-0.019300958445416405
167	Cerebellar nuclei	lateral orbital gyrus	0.033785165589432606
167	Cerebellar nuclei	medial orbital gyrus	-0.010023610665134929
167	Cerebellar nuclei	middle frontal gyrus	0.08909463632893168
167	Cerebellar nuclei	paracentral lobule, anterior part	0.1553140012450053
167	Cerebellar nuclei	paraterminal gyrus	0.01092568728879192
167	Cerebellar nuclei	parolfactory gyri	-0.06877086448211239
167	Cerebellar nuclei	posterior orbital gyrus	5.175295838427402e-4
167	Cerebellar nuclei	precentral gyrus	0.18243764731264575
167	Cerebellar nuclei	superior frontal gyrus	0.0652709281129585
167	Cerebellar nuclei	superior rostral gyrus	-0.010622601944460389
167	Cerebellar nuclei	insula	-0.012380060358868763
167	Cerebellar nuclei	cuneus	0.15821427580911196
167	Cerebellar nuclei	inferior occipital gyrus	0.14638850267907294
167	Cerebellar nuclei	lingual gyrus	0.148435619533974
167	Cerebellar nuclei	occipital pole	0.139514033634957
167	Cerebellar nuclei	occipito-temporal gyrus	0.11781283131413715
167	Cerebellar nuclei	superior occipital gyrus	0.13878663476968525
167	Cerebellar nuclei	inferior parietal lobule	0.1101731839072553
167	Cerebellar nuclei	paracentral lobule, posterior part	0.14575759587283013
167	Cerebellar nuclei	postcentral gyrus	0.16599164015579781
167	Cerebellar nuclei	precuneus	0.1179576036624585
167	Cerebellar nuclei	superior parietal lobule	0.14622315893953278
167	Cerebellar nuclei	fusiform gyrus	0.01183660806115778
167	Cerebellar nuclei	Heschl's gyrus	0.11972856107199761
167	Cerebellar nuclei	inferior temporal gyrus	0.02883463386238826
167	Cerebellar nuclei	middle temporal gyrus	0.05932211374739127
167	Cerebellar nuclei	planum polare	0.013700371193585201
167	Cerebellar nuclei	planum temporale	0.11588514965388737
167	Cerebellar nuclei	superior temporal gyrus	0.07094889003358584
167	Cerebellar nuclei	temporal pole	-0.023157982599334954
167	Cerebellar nuclei	transverse gyri	0.11642667517538002
167	Cerebellar nuclei	amygdala	0.06051686592414317
167	Cerebellar nuclei	globus pallidus	0.7485100826930349
167	Cerebellar nuclei	caudate nucleus	0.23508666397111366
167	Cerebellar nuclei	nucleus accumbens	0.17963284785156
167	Cerebellar nuclei	putamen	0.2631542182328208
167	Cerebellar nuclei	septal nuclei	0.26536917298448914
167	Cerebellar nuclei	substantia innominata	0.3393092094755679
167	Cerebellar nuclei	epithalamus	0.6161164141498348
167	Cerebellar nuclei	hypothalamus	0.39352694032408075
167	Cerebellar nuclei	subthalamus	0.8056839454132401
167	Cerebellar nuclei	thalamus	0.794768883766478
167	Cerebellar nuclei	inferior colliculus	0.7885096524345183
167	Cerebellar nuclei	superior colliculus	0.7784985007788197
167	Cerebellar nuclei	midbrain tegmentum	0.7005791741135958
167	Cerebellar nuclei	pretectal region	0.7438822959653086
167	Cerebellar nuclei	pons	0.8081681538532602
167	Cerebellar nuclei	myelencephalon	0.7960429355680085
167	Cerebellar nuclei	vermal I-II	0.7905567922704616
167	Cerebellar nuclei	vermal III	0.6591428157213441
167	Cerebellar nuclei	vermal IV	0.6181613463741068
167	Cerebellar nuclei	vermal V	0.6107890641249525
167	Cerebellar nuclei	vermal VI	0.6282223435160561
167	Cerebellar nuclei	vermal VIIAf	0.5882998397122566
167	Cerebellar nuclei	vermal VIIAt	0.5662859130391898
167	Cerebellar nuclei	vermal VIIB	0.6251154950785045
167	Cerebellar nuclei	vermal VIIIA	0.5834270966819076
167	Cerebellar nuclei	vermal VIIIB	0.6611332228252788
167	Cerebellar nuclei	vermal IX	0.6276859697126724
167	Cerebellar nuclei	vermal X	0.749952372503169
167	Cerebellar nuclei	III	0.6991481221789027
167	Cerebellar nuclei	IV	0.6434204827449022
167	Cerebellar nuclei	V	0.6151335902334856
167	Cerebellar nuclei	VI	0.5933313873155146
167	Cerebellar nuclei	crus I	0.588310146958109
167	Cerebellar nuclei	crus II	0.5741967051951649
167	Cerebellar nuclei	VIIB	0.5937097220884531
167	Cerebellar nuclei	VIIIA	0.5581409995130779
167	Cerebellar nuclei	VIIIB	0.5991084109553126
167	Cerebellar nuclei	IX	0.5730321421480001
167	Cerebellar nuclei	X	0.6916838058340696
167	Cerebellar nuclei	cerebellar nuclei	0.8559727764462646
168	Cortical subplate-other	claustrum	0.22052075182210196
168	Cortical subplate-other	dentate gyrus	0.40349992681772545
168	Cortical subplate-other	CA1 field	0.5087568078689879
168	Cortical subplate-other	CA2 field	0.4466694849316901
168	Cortical subplate-other	CA3 field	0.3663004488994657
168	Cortical subplate-other	CA4 field	0.5826750406222166
168	Cortical subplate-other	subiculum	0.6230458380692484
168	Cortical subplate-other	cingulate gyrus	0.16506623818118427
168	Cortical subplate-other	parahippocampal gyrus	0.5497804849608778
168	Cortical subplate-other	piriform cortex	0.8776319715425036
168	Cortical subplate-other	anterior orbital gyrus	0.13534984519199256
168	Cortical subplate-other	frontal operculum	0.1710626746387213
168	Cortical subplate-other	frontal pole	0.02170069013274248
168	Cortical subplate-other	gyrus rectus	0.27504777005014164
168	Cortical subplate-other	inferior frontal gyrus	0.014340849631399697
168	Cortical subplate-other	inferior rostral gyrus	0.28942564664245973
168	Cortical subplate-other	lateral orbital gyrus	0.12959444635171036
168	Cortical subplate-other	medial orbital gyrus	0.23669707420893665
168	Cortical subplate-other	middle frontal gyrus	-0.027605193557080514
168	Cortical subplate-other	paracentral lobule, anterior part	-0.27310083466679896
168	Cortical subplate-other	paraterminal gyrus	0.7121344482827461
168	Cortical subplate-other	parolfactory gyri	0.5393286494443555
168	Cortical subplate-other	posterior orbital gyrus	0.12478864177390447
168	Cortical subplate-other	precentral gyrus	-0.32509221684564954
168	Cortical subplate-other	superior frontal gyrus	0.01682184705868545
168	Cortical subplate-other	superior rostral gyrus	0.20314122822490208
168	Cortical subplate-other	insula	0.29639227952017105
168	Cortical subplate-other	cuneus	-0.23195230738660305
168	Cortical subplate-other	inferior occipital gyrus	-0.1992714426378137
168	Cortical subplate-other	lingual gyrus	-0.22531852991830406
168	Cortical subplate-other	occipital pole	-0.1695646016917614
168	Cortical subplate-other	occipito-temporal gyrus	-0.10074321433992285
168	Cortical subplate-other	superior occipital gyrus	-0.1948326486096312
[truncated: 980,667 more rows]
