# Supplementary material for: Whole-brain comparison of rodent and human brains using spatial transcriptomics
Source: eLife. 2022 Nov 7;11:e79418. doi: 10.7554/eLife.79418 (PMC9708081; doi:10.7554/eLife.79418)
Supplement: Figure 2—source data 3. [file elife-79418-fig2-data3.csv]

LatentSpaceID	MouseRegion	HumanRegion	Correlation
334	Primary auditory area	inferior occipital gyrus	0.8120333587708853
334	Primary auditory area	lingual gyrus	0.7786570647890002
334	Primary auditory area	occipital pole	0.7949460625244626
334	Primary auditory area	occipito-temporal gyrus	0.8533808290127514
334	Primary auditory area	superior occipital gyrus	0.8041034625396832
334	Primary auditory area	inferior parietal lobule	0.8578230740407989
334	Primary auditory area	paracentral lobule, posterior part	0.8269263718590668
334	Primary auditory area	postcentral gyrus	0.7437781783532345
334	Primary auditory area	precuneus	0.8421095112493019
334	Primary auditory area	superior parietal lobule	0.8106917710277332
334	Primary auditory area	fusiform gyrus	0.7329842547165597
334	Primary auditory area	Heschl's gyrus	0.8484490707137696
334	Primary auditory area	inferior temporal gyrus	0.8139578669764329
334	Primary auditory area	middle temporal gyrus	0.8489154336554988
334	Primary auditory area	planum polare	0.7711870482078412
334	Primary auditory area	planum temporale	0.8576630686622598
334	Primary auditory area	superior temporal gyrus	0.8508165213925876
334	Primary auditory area	temporal pole	0.5729240987606236
334	Primary auditory area	transverse gyri	0.8455435984490756
334	Primary auditory area	amygdala	-0.061086898657809356
334	Primary auditory area	globus pallidus	-0.08309259652337184
334	Primary auditory area	caudate nucleus	0.11805810941479593
334	Primary auditory area	nucleus accumbens	0.03931388450913526
334	Primary auditory area	putamen	0.10638820415485556
334	Primary auditory area	septal nuclei	-0.2179816893447757
334	Primary auditory area	substantia innominata	-0.19552815416825892
334	Primary auditory area	epithalamus	-0.14939438149064918
334	Primary auditory area	hypothalamus	-0.2184541787801814
334	Primary auditory area	subthalamus	-0.1125642053973598
334	Primary auditory area	thalamus	-0.06885386310716546
334	Primary auditory area	inferior colliculus	-0.07284742675659445
334	Primary auditory area	superior colliculus	-0.1378777885789139
334	Primary auditory area	midbrain tegmentum	-0.15466243546960307
334	Primary auditory area	pretectal region	-0.13833187847799444
334	Primary auditory area	pons	-0.152431315122145
334	Primary auditory area	myelencephalon	-0.13274012125295567
334	Primary auditory area	vermal I-II	0.01323507717706913
334	Primary auditory area	vermal III	0.07872154315555906
334	Primary auditory area	vermal IV	0.08990737292392424
334	Primary auditory area	vermal V	0.11417543488865846
334	Primary auditory area	vermal VI	0.07199367592095228
334	Primary auditory area	vermal VIIAf	0.11164612261898167
334	Primary auditory area	vermal VIIAt	0.12201973391463032
334	Primary auditory area	vermal VIIB	0.09421356600139803
334	Primary auditory area	vermal VIIIA	0.1082552366426492
334	Primary auditory area	vermal VIIIB	0.07880362494571354
334	Primary auditory area	vermal IX	0.08047713064880772
334	Primary auditory area	vermal X	-0.04325579098659882
334	Primary auditory area	III	0.06228459984693945
334	Primary auditory area	IV	0.08320161359332243
334	Primary auditory area	V	0.0974816847327706
334	Primary auditory area	VI	0.1003888828598615
334	Primary auditory area	crus I	0.10186630537029186
334	Primary auditory area	crus II	0.11144577968629964
334	Primary auditory area	VIIB	0.10573341526858805
334	Primary auditory area	VIIIA	0.12606471513098452
334	Primary auditory area	VIIIB	0.09441121742308527
334	Primary auditory area	IX	0.12161831418897301
334	Primary auditory area	X	0.041371004250503905
334	Primary auditory area	cerebellar nuclei	-0.10163856203297374
334	Dorsal auditory area	claustrum	0.5652748602220171
334	Dorsal auditory area	dentate gyrus	0.3185410363921678
334	Dorsal auditory area	CA1 field	0.13036598655582946
334	Dorsal auditory area	CA2 field	0.019159731157987855
334	Dorsal auditory area	CA3 field	-0.0015775964199015956
334	Dorsal auditory area	CA4 field	-0.0811252358089268
334	Dorsal auditory area	subiculum	0.03230094506856882
334	Dorsal auditory area	cingulate gyrus	0.7726197486887488
334	Dorsal auditory area	parahippocampal gyrus	0.4561206055005418
334	Dorsal auditory area	piriform cortex	0.049748495298818474
334	Dorsal auditory area	anterior orbital gyrus	0.7836113940740842
334	Dorsal auditory area	frontal operculum	0.8108610934461808
334	Dorsal auditory area	frontal pole	0.8382431904486229
334	Dorsal auditory area	gyrus rectus	0.698502948042723
334	Dorsal auditory area	inferior frontal gyrus	0.8916839792782668
334	Dorsal auditory area	inferior rostral gyrus	0.6996348706123947
334	Dorsal auditory area	lateral orbital gyrus	0.8723517581924982
334	Dorsal auditory area	medial orbital gyrus	0.7499040666630384
334	Dorsal auditory area	middle frontal gyrus	0.8634708060051972
334	Dorsal auditory area	paracentral lobule, anterior part	0.8444503397201749
334	Dorsal auditory area	paraterminal gyrus	0.14001130170544987
334	Dorsal auditory area	parolfactory gyri	0.3835957441466841
334	Dorsal auditory area	posterior orbital gyrus	0.7982573633567045
334	Dorsal auditory area	precentral gyrus	0.8185921245164655
334	Dorsal auditory area	superior frontal gyrus	0.8383115250889224
334	Dorsal auditory area	superior rostral gyrus	0.72725394123615
334	Dorsal auditory area	insula	0.7268985437622264
334	Dorsal auditory area	cuneus	0.8357880950772721
334	Dorsal auditory area	inferior occipital gyrus	0.8868194684301035
334	Dorsal auditory area	lingual gyrus	0.8624375663606957
334	Dorsal auditory area	occipital pole	0.8769665560827384
334	Dorsal auditory area	occipito-temporal gyrus	0.9088863867204418
334	Dorsal auditory area	superior occipital gyrus	0.8808731362216354
334	Dorsal auditory area	inferior parietal lobule	0.904122418433917
334	Dorsal auditory area	paracentral lobule, posterior part	0.8835264355074111
334	Dorsal auditory area	postcentral gyrus	0.8311797334588473
334	Dorsal auditory area	precuneus	0.8981201598323021
334	Dorsal auditory area	superior parietal lobule	0.8817898455515392
334	Dorsal auditory area	fusiform gyrus	0.7102018844671656
334	Dorsal auditory area	Heschl's gyrus	0.9086561311308083
334	Dorsal auditory area	inferior temporal gyrus	0.8069846883244437
334	Dorsal auditory area	middle temporal gyrus	0.8649692093664054
334	Dorsal auditory area	planum polare	0.7676880200042469
334	Dorsal auditory area	planum temporale	0.9021217294747647
334	Dorsal auditory area	superior temporal gyrus	0.8756560988867002
334	Dorsal auditory area	temporal pole	0.5217913022229032
334	Dorsal auditory area	transverse gyri	0.9096933833021612
334	Dorsal auditory area	amygdala	-0.10669814582391099
334	Dorsal auditory area	globus pallidus	-0.048015453354509303
334	Dorsal auditory area	caudate nucleus	0.15001831946826702
334	Dorsal auditory area	nucleus accumbens	0.05421065799163863
334	Dorsal auditory area	putamen	0.1420183847182672
334	Dorsal auditory area	septal nuclei	-0.20573684259401853
334	Dorsal auditory area	substantia innominata	-0.17330418687481536
334	Dorsal auditory area	epithalamus	-0.1168326518135462
334	Dorsal auditory area	hypothalamus	-0.20149738729361255
334	Dorsal auditory area	subthalamus	-0.06823876009753242
334	Dorsal auditory area	thalamus	-0.024918311591001597
334	Dorsal auditory area	inferior colliculus	-0.02853597150708991
334	Dorsal auditory area	superior colliculus	-0.0997015493362996
334	Dorsal auditory area	midbrain tegmentum	-0.11823592402936356
334	Dorsal auditory area	pretectal region	-0.10598787680639823
334	Dorsal auditory area	pons	-0.11310745064652762
334	Dorsal auditory area	myelencephalon	-0.09435363968685849
334	Dorsal auditory area	vermal I-II	0.03682094111426682
334	Dorsal auditory area	vermal III	0.07848791539602766
334	Dorsal auditory area	vermal IV	0.08402806821921797
334	Dorsal auditory area	vermal V	0.10578816924069685
334	Dorsal auditory area	vermal VI	0.06746496018776839
334	Dorsal auditory area	vermal VIIAf	0.10248729489474036
334	Dorsal auditory area	vermal VIIAt	0.1080442575493759
334	Dorsal auditory area	vermal VIIB	0.09400899391839725
334	Dorsal auditory area	vermal VIIIA	0.0999135260252676
334	Dorsal auditory area	vermal VIIIB	0.08344573659379406
334	Dorsal auditory area	vermal IX	0.0788003645971093
334	Dorsal auditory area	vermal X	-0.01744466883211479
334	Dorsal auditory area	III	0.06599716944787593
334	Dorsal auditory area	IV	0.07811317163632613
334	Dorsal auditory area	V	0.08813645452636985
334	Dorsal auditory area	VI	0.08877546569512776
334	Dorsal auditory area	crus I	0.08980149314745892
334	Dorsal auditory area	crus II	0.09744885843623732
334	Dorsal auditory area	VIIB	0.09357728541940806
334	Dorsal auditory area	VIIIA	0.10928146768557546
334	Dorsal auditory area	VIIIB	0.08309133767294462
334	Dorsal auditory area	IX	0.10946863195050845
334	Dorsal auditory area	X	0.04398961249729352
334	Dorsal auditory area	cerebellar nuclei	-0.05897595073038243
334	Ventral auditory area	claustrum	0.7113895531396413
334	Ventral auditory area	dentate gyrus	0.3789078713477062
334	Ventral auditory area	CA1 field	0.1788132778456778
334	Ventral auditory area	CA2 field	0.1014214340901818
334	Ventral auditory area	CA3 field	0.07050150564913447
334	Ventral auditory area	CA4 field	0.017502219636811023
334	Ventral auditory area	subiculum	0.0787311744650364
334	Ventral auditory area	cingulate gyrus	0.7390663570518972
334	Ventral auditory area	parahippocampal gyrus	0.5564357436828121
334	Ventral auditory area	piriform cortex	0.24787297435800754
334	Ventral auditory area	anterior orbital gyrus	0.7371389386863866
334	Ventral auditory area	frontal operculum	0.7971005871581716
334	Ventral auditory area	frontal pole	0.7585575510358655
334	Ventral auditory area	gyrus rectus	0.7134776244435429
334	Ventral auditory area	inferior frontal gyrus	0.7963198220958646
334	Ventral auditory area	inferior rostral gyrus	0.7152501354239953
334	Ventral auditory area	lateral orbital gyrus	0.8009568859947022
334	Ventral auditory area	medial orbital gyrus	0.7428654726261645
334	Ventral auditory area	middle frontal gyrus	0.7449976381008808
334	Ventral auditory area	paracentral lobule, anterior part	0.6538554319383257
334	Ventral auditory area	paraterminal gyrus	0.21707626603797167
334	Ventral auditory area	parolfactory gyri	0.4727021991528171
334	Ventral auditory area	posterior orbital gyrus	0.7818185205742219
334	Ventral auditory area	precentral gyrus	0.6104932518010482
334	Ventral auditory area	superior frontal gyrus	0.7497651596429205
334	Ventral auditory area	superior rostral gyrus	0.7119769247538853
334	Ventral auditory area	insula	0.7576151728266985
334	Ventral auditory area	cuneus	0.6247281964247531
334	Ventral auditory area	inferior occipital gyrus	0.7009476542274828
334	Ventral auditory area	lingual gyrus	0.6594668743213306
334	Ventral auditory area	occipital pole	0.6816375530726209
334	Ventral auditory area	occipito-temporal gyrus	0.7655173643487644
334	Ventral auditory area	superior occipital gyrus	0.6903134987230082
334	Ventral auditory area	inferior parietal lobule	0.7730495850840432
334	Ventral auditory area	paracentral lobule, posterior part	0.7167514316461177
334	Ventral auditory area	postcentral gyrus	0.620978390991111
334	Ventral auditory area	precuneus	0.7380701388424088
334	Ventral auditory area	superior parietal lobule	0.6915924543120817
334	Ventral auditory area	fusiform gyrus	0.742906670638471
334	Ventral auditory area	Heschl's gyrus	0.7572462234124352
334	Ventral auditory area	inferior temporal gyrus	0.7960220368362974
334	Ventral auditory area	middle temporal gyrus	0.8054279662263222
334	Ventral auditory area	planum polare	0.7668889498634501
334	Ventral auditory area	planum temporale	0.7544159747635893
334	Ventral auditory area	superior temporal gyrus	0.7972547929757392
334	Ventral auditory area	temporal pole	0.6146673742852291
334	Ventral auditory area	transverse gyri	0.7518923690801951
334	Ventral auditory area	amygdala	0.033454602275042086
334	Ventral auditory area	globus pallidus	-0.07308071185933458
334	Ventral auditory area	caudate nucleus	0.23103026350057324
334	Ventral auditory area	nucleus accumbens	0.16139208861957005
334	Ventral auditory area	putamen	0.21625113636472626
334	Ventral auditory area	septal nuclei	-0.15149164723984837
334	Ventral auditory area	substantia innominata	-0.12875265281582376
334	Ventral auditory area	epithalamus	-0.1412740805835166
334	Ventral auditory area	hypothalamus	-0.19204421293713211
334	Ventral auditory area	subthalamus	-0.13843618048800474
334	Ventral auditory area	thalamus	-0.08425409279556755
334	Ventral auditory area	inferior colliculus	-0.07028874759019389
334	Ventral auditory area	superior colliculus	-0.14237924562625445
334	Ventral auditory area	midbrain tegmentum	-0.16188102538724525
334	Ventral auditory area	pretectal region	-0.13245167445113287
334	Ventral auditory area	pons	-0.17741727774096497
334	Ventral auditory area	myelencephalon	-0.15096429846145598
334	Ventral auditory area	vermal I-II	-0.03247880741232283
334	Ventral auditory area	vermal III	0.028141642065497137
334	Ventral auditory area	vermal IV	0.03748360576894938
334	Ventral auditory area	vermal V	0.05526891748881796
334	Ventral auditory area	vermal VI	0.024095576536744562
334	Ventral auditory area	vermal VIIAf	0.057700244288792335
334	Ventral auditory area	vermal VIIAt	0.07150260499903754
334	Ventral auditory area	vermal VIIB	0.04324466016362074
334	Ventral auditory area	vermal VIIIA	0.05594069113421309
334	Ventral auditory area	vermal VIIIB	0.029253808141733204
334	Ventral auditory area	vermal IX	0.025575385666427
334	Ventral auditory area	vermal X	-0.08482979879964599
334	Ventral auditory area	III	0.004720439638389434
334	Ventral auditory area	IV	0.030047364684899082
334	Ventral auditory area	V	0.04033613362171381
334	Ventral auditory area	VI	0.04402488686855382
334	Ventral auditory area	crus I	0.04824110322044434
334	Ventral auditory area	crus II	0.05882611052173883
334	Ventral auditory area	VIIB	0.052459995941904654
334	Ventral auditory area	VIIIA	0.07386047356512282
334	Ventral auditory area	VIIIB	0.046575781586743026
334	Ventral auditory area	IX	0.07256616971802796
334	Ventral auditory area	X	-0.008514551419686548
334	Ventral auditory area	cerebellar nuclei	-0.11904569217497182
334	Agranular insular area	claustrum	0.7728977717747018
334	Agranular insular area	dentate gyrus	0.6879524011260953
334	Agranular insular area	CA1 field	0.587770113915281
334	Agranular insular area	CA2 field	0.4185532956470659
334	Agranular insular area	CA3 field	0.35195067421703746
334	Agranular insular area	CA4 field	0.2795237606797594
334	Agranular insular area	subiculum	0.47874425316573266
334	Agranular insular area	cingulate gyrus	0.7129418334165796
334	Agranular insular area	parahippocampal gyrus	0.7456606616178515
334	Agranular insular area	piriform cortex	0.5690948039177194
334	Agranular insular area	anterior orbital gyrus	0.7162840897215499
334	Agranular insular area	frontal operculum	0.7177323921248383
334	Agranular insular area	frontal pole	0.6671044427519685
334	Agranular insular area	gyrus rectus	0.7784187325216788
334	Agranular insular area	inferior frontal gyrus	0.5775292449341881
334	Agranular insular area	inferior rostral gyrus	0.7434545118986422
334	Agranular insular area	lateral orbital gyrus	0.6496761471776004
334	Agranular insular area	medial orbital gyrus	0.7408618717315658
334	Agranular insular area	middle frontal gyrus	0.5642018360311835
334	Agranular insular area	paracentral lobule, anterior part	0.33756284782593415
334	Agranular insular area	paraterminal gyrus	0.5497298712160081
334	Agranular insular area	parolfactory gyri	0.733357373276618
334	Agranular insular area	posterior orbital gyrus	0.7468505009941585
334	Agranular insular area	precentral gyrus	0.2854955230643355
334	Agranular insular area	superior frontal gyrus	0.6346787207053431
334	Agranular insular area	superior rostral gyrus	0.7332212975262167
334	Agranular insular area	insula	0.7589570846431304
334	Agranular insular area	cuneus	0.11946292167825064
334	Agranular insular area	inferior occipital gyrus	0.29992536948272486
334	Agranular insular area	lingual gyrus	0.14459286437842733
334	Agranular insular area	occipital pole	0.18734787475187925
334	Agranular insular area	occipito-temporal gyrus	0.45155777686691495
334	Agranular insular area	superior occipital gyrus	0.2841013906975109
334	Agranular insular area	inferior parietal lobule	0.4964565274159167
334	Agranular insular area	paracentral lobule, posterior part	0.3622909760941304
334	Agranular insular area	postcentral gyrus	0.22742884038955774
334	Agranular insular area	precuneus	0.4451814264287233
334	Agranular insular area	superior parietal lobule	0.33788279191810844
334	Agranular insular area	fusiform gyrus	0.7547733287925632
334	Agranular insular area	Heschl's gyrus	0.4100974050441387
334	Agranular insular area	inferior temporal gyrus	0.7131436507084506
334	Agranular insular area	middle temporal gyrus	0.6609608040996402
334	Agranular insular area	planum polare	0.7410652472359758
334	Agranular insular area	planum temporale	0.46651541673520347
334	Agranular insular area	superior temporal gyrus	0.6152886044372989
334	Agranular insular area	temporal pole	0.7879075144906568
334	Agranular insular area	transverse gyri	0.38785310894076747
334	Agranular insular area	amygdala	0.3741189504091518
334	Agranular insular area	globus pallidus	-0.003810069476626117
334	Agranular insular area	caudate nucleus	0.1713960139677296
334	Agranular insular area	nucleus accumbens	0.2218394645169122
334	Agranular insular area	putamen	0.13762767735225007
334	Agranular insular area	septal nuclei	0.06786356029568744
334	Agranular insular area	substantia innominata	-0.01553162016744041
334	Agranular insular area	epithalamus	0.008563295121727191
334	Agranular insular area	hypothalamus	-0.043071754064299826
334	Agranular insular area	subthalamus	-0.09792956396954822
334	Agranular insular area	thalamus	-0.1277568113921292
334	Agranular insular area	inferior colliculus	-0.14606542429728975
334	Agranular insular area	superior colliculus	-0.10911084223271286
334	Agranular insular area	midbrain tegmentum	-0.05703348582271006
334	Agranular insular area	pretectal region	-0.05281100937676026
334	Agranular insular area	pons	-0.07706743014469083
334	Agranular insular area	myelencephalon	-0.04871619081212102
334	Agranular insular area	vermal I-II	0.025032107700977586
334	Agranular insular area	vermal III	0.0932162503194341
334	Agranular insular area	vermal IV	0.11875228702479676
334	Agranular insular area	vermal V	0.12829997288891806
334	Agranular insular area	vermal VI	0.1258018465473297
334	Agranular insular area	vermal VIIAf	0.14551192857209733
334	Agranular insular area	vermal VIIAt	0.1674873603152047
334	Agranular insular area	vermal VIIB	0.11628289614475172
334	Agranular insular area	vermal VIIIA	0.13608051418305134
334	Agranular insular area	vermal VIIIB	0.08433069170425266
334	Agranular insular area	vermal IX	0.11483653126830197
334	Agranular insular area	vermal X	-0.012712571989262521
334	Agranular insular area	III	0.08177062665449998
334	Agranular insular area	IV	0.1310552444548075
334	Agranular insular area	V	0.13641639058156152
334	Agranular insular area	VI	0.14574611991787398
334	Agranular insular area	crus I	0.15716588329308415
334	Agranular insular area	crus II	0.17998903101213654
334	Agranular insular area	VIIB	0.1608972727590358
334	Agranular insular area	VIIIA	0.17956912189871024
334	Agranular insular area	VIIIB	0.17095196183009695
334	Agranular insular area	IX	0.20079534428189777
334	Agranular insular area	X	0.0871457607340032
334	Agranular insular area	cerebellar nuclei	-0.06478277557475957
334	Ectorhinal area	claustrum	0.9273231331040694
334	Ectorhinal area	dentate gyrus	0.610949671392113
334	Ectorhinal area	CA1 field	0.44849033487621154
334	Ectorhinal area	CA2 field	0.35159716704560234
334	Ectorhinal area	CA3 field	0.29069237152652927
334	Ectorhinal area	CA4 field	0.23926265004946184
334	Ectorhinal area	subiculum	0.32995556147255567
334	Ectorhinal area	cingulate gyrus	0.7521838867388392
334	Ectorhinal area	parahippocampal gyrus	0.7807435171174549
334	Ectorhinal area	piriform cortex	0.5869047089641879
334	Ectorhinal area	anterior orbital gyrus	0.7347819100875089
334	Ectorhinal area	frontal operculum	0.8033313377104485
334	Ectorhinal area	frontal pole	0.686265413461917
334	Ectorhinal area	gyrus rectus	0.8066335551955327
334	Ectorhinal area	inferior frontal gyrus	0.6589386827770781
334	Ectorhinal area	inferior rostral gyrus	0.7938002196654413
334	Ectorhinal area	lateral orbital gyrus	0.7095525699080115
334	Ectorhinal area	medial orbital gyrus	0.7852108997907847
334	Ectorhinal area	middle frontal gyrus	0.6051707560474643
334	Ectorhinal area	paracentral lobule, anterior part	0.3894853940029023
334	Ectorhinal area	paraterminal gyrus	0.5026378386011118
334	Ectorhinal area	parolfactory gyri	0.7298465060181295
334	Ectorhinal area	posterior orbital gyrus	0.7979303550960619
334	Ectorhinal area	precentral gyrus	0.3247800339763917
334	Ectorhinal area	superior frontal gyrus	0.6702334633446659
334	Ectorhinal area	superior rostral gyrus	0.759354923830943
334	Ectorhinal area	insula	0.8386864563643724
334	Ectorhinal area	cuneus	0.23336408830971866
334	Ectorhinal area	inferior occipital gyrus	0.3882651768887503
334	Ectorhinal area	lingual gyrus	0.2725150774035808
334	Ectorhinal area	occipital pole	0.31534676216427154
334	Ectorhinal area	occipito-temporal gyrus	0.5370950586831114
334	Ectorhinal area	superior occipital gyrus	0.370920255455613
334	Ectorhinal area	inferior parietal lobule	0.576606084302073
334	Ectorhinal area	paracentral lobule, posterior part	0.44207271139264515
334	Ectorhinal area	postcentral gyrus	0.2944242792877936
334	Ectorhinal area	precuneus	0.5051032843591482
334	Ectorhinal area	superior parietal lobule	0.40303648131361375
334	Ectorhinal area	fusiform gyrus	0.8309329337375436
334	Ectorhinal area	Heschl's gyrus	0.49747408152064576
334	Ectorhinal area	inferior temporal gyrus	0.7971509380559099
334	Ectorhinal area	middle temporal gyrus	0.7328997556860292
334	Ectorhinal area	planum polare	0.8065501528400427
334	Ectorhinal area	planum temporale	0.5303114692780755
334	Ectorhinal area	superior temporal gyrus	0.6927525241031
334	Ectorhinal area	temporal pole	0.8300969115714599
334	Ectorhinal area	transverse gyri	0.4872807475718694
334	Ectorhinal area	amygdala	0.3465913375471016
334	Ectorhinal area	globus pallidus	-0.040231803459438296
334	Ectorhinal area	caudate nucleus	0.3392379091712842
334	Ectorhinal area	nucleus accumbens	0.34190305649412767
334	Ectorhinal area	putamen	0.308080213468502
334	Ectorhinal area	septal nuclei	0.031985445351207495
334	Ectorhinal area	substantia innominata	-0.005229362975712098
334	Ectorhinal area	epithalamus	-0.07271276059503992
334	Ectorhinal area	hypothalamus	-0.090691449578961
334	Ectorhinal area	subthalamus	-0.1698797992423197
334	Ectorhinal area	thalamus	-0.15367718026633323
334	Ectorhinal area	inferior colliculus	-0.12987769275227595
334	Ectorhinal area	superior colliculus	-0.15706722860099329
334	Ectorhinal area	midbrain tegmentum	-0.1362095843138104
334	Ectorhinal area	pretectal region	-0.10476784547492204
334	Ectorhinal area	pons	-0.17747169899449158
334	Ectorhinal area	myelencephalon	-0.13848236101363293
334	Ectorhinal area	vermal I-II	-0.056771701030188366
334	Ectorhinal area	vermal III	0.014007276363359506
334	Ectorhinal area	vermal IV	0.030482456576501532
334	Ectorhinal area	vermal V	0.03897008856639332
334	Ectorhinal area	vermal VI	0.031315340957014715
334	Ectorhinal area	vermal VIIAf	0.05435350757640134
334	Ectorhinal area	vermal VIIAt	0.07862427578261892
334	Ectorhinal area	vermal VIIB	0.033297166291691195
334	Ectorhinal area	vermal VIIIA	0.05083203011045986
334	Ectorhinal area	vermal VIIIB	0.008979452196898592
334	Ectorhinal area	vermal IX	0.018484300010195215
334	Ectorhinal area	vermal X	-0.10219447307873207
334	Ectorhinal area	III	-0.015437691676526456
334	Ectorhinal area	IV	0.031974350744492994
334	Ectorhinal area	V	0.036209135698990515
334	Ectorhinal area	VI	0.0441063685945347
334	Ectorhinal area	crus I	0.054908821430085755
334	Ectorhinal area	crus II	0.07346087638686906
334	Ectorhinal area	VIIB	0.05997714467416854
334	Ectorhinal area	VIIIA	0.08455084829289292
334	Ectorhinal area	VIIIB	0.06669652318153385
334	Ectorhinal area	IX	0.09388126780532954
334	Ectorhinal area	X	-0.012685870165969886
334	Ectorhinal area	cerebellar nuclei	-0.13454437127019186
334	Primary motor area	claustrum	0.5087889847087217
334	Primary motor area	dentate gyrus	0.39804280725907615
334	Primary motor area	CA1 field	0.20628081236750295
334	Primary motor area	CA2 field	0.021290759007661246
334	Primary motor area	CA3 field	-0.008258029429823852
334	Primary motor area	CA4 field	-0.12511200215817025
334	Primary motor area	subiculum	0.08551689015684615
334	Primary motor area	cingulate gyrus	0.805470298043945
334	Primary motor area	parahippocampal gyrus	0.42141826858308234
334	Primary motor area	piriform cortex	-0.03676644766551614
334	Primary motor area	anterior orbital gyrus	0.8346567075581198
334	Primary motor area	frontal operculum	0.8268984336002123
334	Primary motor area	frontal pole	0.8652883584699976
334	Primary motor area	gyrus rectus	0.7257287942151577
334	Primary motor area	inferior frontal gyrus	0.920757629909466
334	Primary motor area	inferior rostral gyrus	0.699954028742367
334	Primary motor area	lateral orbital gyrus	0.8849661288630786
334	Primary motor area	medial orbital gyrus	0.7684756758524055
334	Primary motor area	middle frontal gyrus	0.9158184446120288
334	Primary motor area	paracentral lobule, anterior part	0.9396158962540202
334	Primary motor area	paraterminal gyrus	0.21542967295405768
334	Primary motor area	parolfactory gyri	0.420489245313694
334	Primary motor area	posterior orbital gyrus	0.8344144057375766
334	Primary motor area	precentral gyrus	0.9221819711520564
334	Primary motor area	superior frontal gyrus	0.8948543049521352
334	Primary motor area	superior rostral gyrus	0.7615883332212097
334	Primary motor area	insula	0.7210303604184601
334	Primary motor area	cuneus	0.8181287199107193
334	Primary motor area	inferior occipital gyrus	0.905852275314649
334	Primary motor area	lingual gyrus	0.8270635412591264
334	Primary motor area	occipital pole	0.8533705204963233
334	Primary motor area	occipito-temporal gyrus	0.9325788522878918
334	Primary motor area	superior occipital gyrus	0.89522350082447
334	Primary motor area	inferior parietal lobule	0.9277594512529594
334	Primary motor area	paracentral lobule, posterior part	0.8844693771377354
334	Primary motor area	postcentral gyrus	0.8920175916121081
334	Primary motor area	precuneus	0.9318816833145601
334	Primary motor area	superior parietal lobule	0.9210758994528824
334	Primary motor area	fusiform gyrus	0.7047015710726624
334	Primary motor area	Heschl's gyrus	0.9230748832839453
334	Primary motor area	inferior temporal gyrus	0.7983226880826862
334	Primary motor area	middle temporal gyrus	0.8869279620908358
334	Primary motor area	planum polare	0.795041549744958
334	Primary motor area	planum temporale	0.9072068331115423
334	Primary motor area	superior temporal gyrus	0.8989741771780888
334	Primary motor area	temporal pole	0.5151790577600313
334	Primary motor area	transverse gyri	0.9314602761491441
334	Primary motor area	amygdala	-0.11068401385073694
334	Primary motor area	globus pallidus	0.013342554196866493
334	Primary motor area	caudate nucleus	0.1501622732677917
334	Primary motor area	nucleus accumbens	0.06011978952873467
334	Primary motor area	putamen	0.14100657460084923
334	Primary motor area	septal nuclei	-0.13224880666302963
334	Primary motor area	substantia innominata	-0.14523649677696357
334	Primary motor area	epithalamus	-0.013241097330265858
334	Primary motor area	hypothalamus	-0.14839171606550233
334	Primary motor area	subthalamus	0.0020618838746751084
334	Primary motor area	thalamus	-0.031638864204841
334	Primary motor area	inferior colliculus	-0.017391182406748338
334	Primary motor area	superior colliculus	-0.05399267616888328
334	Primary motor area	midbrain tegmentum	-0.026020983625444843
334	Primary motor area	pretectal region	-0.042989377471522434
334	Primary motor area	pons	-0.008803749438885192
334	Primary motor area	myelencephalon	0.015122098222094003
334	Primary motor area	vermal I-II	0.09428455720917607
334	Primary motor area	vermal III	0.09543302470817398
334	Primary motor area	vermal IV	0.09627702578150434
334	Primary motor area	vermal V	0.10909491105113198
334	Primary motor area	vermal VI	0.09204770823643771
334	Primary motor area	vermal VIIAf	0.10934247001912918
334	Primary motor area	vermal VIIAt	0.11421320954178217
334	Primary motor area	vermal VIIB	0.12021473382626395
334	Primary motor area	vermal VIIIA	0.10844587013710615
334	Primary motor area	vermal VIIIB	0.10680270782203011
334	Primary motor area	vermal IX	0.11433875744796004
334	Primary motor area	vermal X	0.059199340466097
334	Primary motor area	III	0.08603120520274357
334	Primary motor area	IV	0.09929951407958894
334	Primary motor area	V	0.10028134273640502
334	Primary motor area	VI	0.09899063263618176
334	Primary motor area	crus I	0.10767272071156106
334	Primary motor area	crus II	0.12131356746736395
334	Primary motor area	VIIB	0.11196866473520084
334	Primary motor area	VIIIA	0.11906142607564915
334	Primary motor area	VIIIB	0.11000266480057193
334	Primary motor area	IX	0.14280086973654732
334	Primary motor area	X	0.08732062957752364
334	Primary motor area	cerebellar nuclei	0.027248473717512645
334	Secondary motor area	claustrum	0.5612793354654712
334	Secondary motor area	dentate gyrus	0.532232728720389
334	Secondary motor area	CA1 field	0.41713176277439545
334	Secondary motor area	CA2 field	0.20228242256855888
334	Secondary motor area	CA3 field	0.16335412056654694
334	Secondary motor area	CA4 field	0.030793345137675652
334	Secondary motor area	subiculum	0.31669907124914365
334	Secondary motor area	cingulate gyrus	0.8737353765085322
334	Secondary motor area	parahippocampal gyrus	0.5804961722229606
334	Secondary motor area	piriform cortex	0.12450458789131967
334	Secondary motor area	anterior orbital gyrus	0.8947997014060607
334	Secondary motor area	frontal operculum	0.859326169184874
334	Secondary motor area	frontal pole	0.9146005356023232
334	Secondary motor area	gyrus rectus	0.8227574680306093
334	Secondary motor area	inferior frontal gyrus	0.8971157798826971
334	Secondary motor area	inferior rostral gyrus	0.8024515600908887
334	Secondary motor area	lateral orbital gyrus	0.8971532072773005
334	Secondary motor area	medial orbital gyrus	0.845294712180587
334	Secondary motor area	middle frontal gyrus	0.9174008716268713
334	Secondary motor area	paracentral lobule, anterior part	0.8445063722408328
334	Secondary motor area	paraterminal gyrus	0.3937898464094537
334	Secondary motor area	parolfactory gyri	0.58345337473492
334	Secondary motor area	posterior orbital gyrus	0.8677725454782453
334	Secondary motor area	precentral gyrus	0.8216316747787751
334	Secondary motor area	superior frontal gyrus	0.9192196430329438
334	Secondary motor area	superior rostral gyrus	0.8476490541238635
334	Secondary motor area	insula	0.7956419832844455
334	Secondary motor area	cuneus	0.6732801722913895
334	Secondary motor area	inferior occipital gyrus	0.8011729684552833
334	Secondary motor area	lingual gyrus	0.687198416699294
334	Secondary motor area	occipital pole	0.7195709880164503
334	Secondary motor area	occipito-temporal gyrus	0.8656386305125571
334	Secondary motor area	superior occipital gyrus	0.7940850092343583
334	Secondary motor area	inferior parietal lobule	0.8889569130669474
334	Secondary motor area	paracentral lobule, posterior part	0.838507799062983
334	Secondary motor area	postcentral gyrus	0.7693065703522944
334	Secondary motor area	precuneus	0.8860896199339586
334	Secondary motor area	superior parietal lobule	0.8433958754934873
334	Secondary motor area	fusiform gyrus	0.7817531116253106
334	Secondary motor area	Heschl's gyrus	0.8399260859987788
334	Secondary motor area	inferior temporal gyrus	0.8446397006494094
334	Secondary motor area	middle temporal gyrus	0.8922773184407778
334	Secondary motor area	planum polare	0.8377576539511847
334	Secondary motor area	planum temporale	0.8846566064069203
334	Secondary motor area	superior temporal gyrus	0.8945765018642505
334	Secondary motor area	temporal pole	0.6511188876478964
334	Secondary motor area	transverse gyri	0.8392744771163473
334	Secondary motor area	amygdala	0.03931537886646127
334	Secondary motor area	globus pallidus	-0.012361461670809709
334	Secondary motor area	caudate nucleus	0.05449326548330688
334	Secondary motor area	nucleus accumbens	0.022786748452194538
334	Secondary motor area	putamen	0.03326401213914765
334	Secondary motor area	septal nuclei	-0.08976383924414545
334	Secondary motor area	substantia innominata	-0.13504899455773242
334	Secondary motor area	epithalamus	8.43520620730284e-4
334	Secondary motor area	hypothalamus	-0.09629389908449508
334	Secondary motor area	subthalamus	-0.006818654439782551
334	Secondary motor area	thalamus	-0.03975802476875466
334	Secondary motor area	inferior colliculus	-0.0574205984109928
334	Secondary motor area	superior colliculus	-0.05486701002362641
334	Secondary motor area	midbrain tegmentum	-0.01936891091084214
334	Secondary motor area	pretectal region	-0.04361567330766103
334	Secondary motor area	pons	-0.005524859517963468
334	Secondary motor area	myelencephalon	0.011954031187814839
334	Secondary motor area	vermal I-II	0.1150045063102667
334	Secondary motor area	vermal III	0.14526685772282225
334	Secondary motor area	vermal IV	0.15709997808414963
334	Secondary motor area	vermal V	0.17427846861962398
334	Secondary motor area	vermal VI	0.15193039575940034
334	Secondary motor area	vermal VIIAf	0.1770162816664396
334	Secondary motor area	vermal VIIAt	0.18117659808105221
334	Secondary motor area	vermal VIIB	0.17042949229282545
334	Secondary motor area	vermal VIIIA	0.17178178024615182
334	Secondary motor area	vermal VIIIB	0.1520135048834396
334	Secondary motor area	vermal IX	0.17336746760931157
334	Secondary motor area	vermal X	0.08355442966927545
334	Secondary motor area	III	0.13959378554734977
334	Secondary motor area	IV	0.15836010397989203
334	Secondary motor area	V	0.16592260878886725
334	Secondary motor area	VI	0.16955250692694077
334	Secondary motor area	crus I	0.1752607391398904
334	Secondary motor area	crus II	0.19010753825445345
334	Secondary motor area	VIIB	0.17925183947948997
334	Secondary motor area	VIIIA	0.18880102586820574
334	Secondary motor area	VIIIB	0.17643710304730523
334	Secondary motor area	IX	0.2042549799497128
334	Secondary motor area	X	0.13603290991796402
334	Secondary motor area	cerebellar nuclei	0.0055165254606431785
334	Frontal pole, cerebral cortex	claustrum	0.617862531773559
334	Frontal pole, cerebral cortex	dentate gyrus	0.6565190728170494
334	Frontal pole, cerebral cortex	CA1 field	0.5601355699752557
334	Frontal pole, cerebral cortex	CA2 field	0.35462652751514917
334	Frontal pole, cerebral cortex	CA3 field	0.3017830689407895
334	Frontal pole, cerebral cortex	CA4 field	0.1973895038165695
334	Frontal pole, cerebral cortex	subiculum	0.46044905858597623
334	Frontal pole, cerebral cortex	cingulate gyrus	0.7454870052385133
334	Frontal pole, cerebral cortex	parahippocampal gyrus	0.6596874598763915
334	Frontal pole, cerebral cortex	piriform cortex	0.37480356422637745
334	Frontal pole, cerebral cortex	anterior orbital gyrus	0.7643114979681852
334	Frontal pole, cerebral cortex	frontal operculum	0.7227207767254682
334	Frontal pole, cerebral cortex	frontal pole	0.745869608090495
334	Frontal pole, cerebral cortex	gyrus rectus	0.7759786294225061
334	Frontal pole, cerebral cortex	inferior frontal gyrus	0.6487421175117775
334	Frontal pole, cerebral cortex	inferior rostral gyrus	0.7410877327557589
334	Frontal pole, cerebral cortex	lateral orbital gyrus	0.7018579724838454
334	Frontal pole, cerebral cortex	medial orbital gyrus	0.7531428880791926
334	Frontal pole, cerebral cortex	middle frontal gyrus	0.6661278623084536
334	Frontal pole, cerebral cortex	paracentral lobule, anterior part	0.48517497289391504
334	Frontal pole, cerebral cortex	paraterminal gyrus	0.5070689604780304
334	Frontal pole, cerebral cortex	parolfactory gyri	0.6764848138197749
334	Frontal pole, cerebral cortex	posterior orbital gyrus	0.7537342943041974
334	Frontal pole, cerebral cortex	precentral gyrus	0.4489197194992095
334	Frontal pole, cerebral cortex	superior frontal gyrus	0.7139271920460353
334	Frontal pole, cerebral cortex	superior rostral gyrus	0.7598939787081632
334	Frontal pole, cerebral cortex	insula	0.732036003899331
334	Frontal pole, cerebral cortex	cuneus	0.2645613944874691
334	Frontal pole, cerebral cortex	inferior occipital gyrus	0.4342134903813062
334	Frontal pole, cerebral cortex	lingual gyrus	0.2814582314307675
334	Frontal pole, cerebral cortex	occipital pole	0.3200412997760329
334	Frontal pole, cerebral cortex	occipito-temporal gyrus	0.5539550833341552
334	Frontal pole, cerebral cortex	superior occipital gyrus	0.4214606840751913
334	Frontal pole, cerebral cortex	inferior parietal lobule	0.5954469120007978
334	Frontal pole, cerebral cortex	paracentral lobule, posterior part	0.4964804086687714
334	Frontal pole, cerebral cortex	postcentral gyrus	0.38197855941716474
334	Frontal pole, cerebral cortex	precuneus	0.5704027758030248
334	Frontal pole, cerebral cortex	superior parietal lobule	0.48499932323461864
334	Frontal pole, cerebral cortex	fusiform gyrus	0.7244087606943059
334	Frontal pole, cerebral cortex	Heschl's gyrus	0.51679983549073
334	Frontal pole, cerebral cortex	inferior temporal gyrus	0.7158090983350622
334	Frontal pole, cerebral cortex	middle temporal gyrus	0.7018169832542477
334	Frontal pole, cerebral cortex	planum polare	0.7350220846885035
334	Frontal pole, cerebral cortex	planum temporale	0.5855652070976773
334	Frontal pole, cerebral cortex	superior temporal gyrus	0.6735127862271724
334	Frontal pole, cerebral cortex	temporal pole	0.7135144854033696
334	Frontal pole, cerebral cortex	transverse gyri	0.5032409386228263
334	Frontal pole, cerebral cortex	amygdala	0.24073417116101475
334	Frontal pole, cerebral cortex	globus pallidus	-0.01455559481037013
334	Frontal pole, cerebral cortex	caudate nucleus	0.03661845157233532
334	Frontal pole, cerebral cortex	nucleus accumbens	0.0712561572837696
334	Frontal pole, cerebral cortex	putamen	0.006854937497715721
334	Frontal pole, cerebral cortex	septal nuclei	-0.008966877744053678
334	Frontal pole, cerebral cortex	substantia innominata	-0.09779743266188376
334	Frontal pole, cerebral cortex	epithalamus	0.015068630087171716
334	Frontal pole, cerebral cortex	hypothalamus	-0.06579173663105294
334	Frontal pole, cerebral cortex	subthalamus	-0.05566443401373916
334	Frontal pole, cerebral cortex	thalamus	-0.0791378667451591
334	Frontal pole, cerebral cortex	inferior colliculus	-0.1281346812700148
334	Frontal pole, cerebral cortex	superior colliculus	-0.08475834520667573
334	Frontal pole, cerebral cortex	midbrain tegmentum	-0.04049013928816031
334	Frontal pole, cerebral cortex	pretectal region	-0.05128769730994907
334	Frontal pole, cerebral cortex	pons	-0.04020553127429182
334	Frontal pole, cerebral cortex	myelencephalon	-0.019168460722907402
334	Frontal pole, cerebral cortex	vermal I-II	0.10210364101874217
334	Frontal pole, cerebral cortex	vermal III	0.17155148300658168
334	Frontal pole, cerebral cortex	vermal IV	0.19795386519199448
334	Frontal pole, cerebral cortex	vermal V	0.21401001008088533
334	Frontal pole, cerebral cortex	vermal VI	0.19873279817127593
334	Frontal pole, cerebral cortex	vermal VIIAf	0.22354073324977378
334	Frontal pole, cerebral cortex	vermal VIIAt	0.24089747974832137
334	Frontal pole, cerebral cortex	vermal VIIB	0.19604609369237988
334	Frontal pole, cerebral cortex	vermal VIIIA	0.21521448968164703
334	Frontal pole, cerebral cortex	vermal VIIIB	0.1654783282738872
334	Frontal pole, cerebral cortex	vermal IX	0.20266709593645743
334	Frontal pole, cerebral cortex	vermal X	0.06673745371699927
334	Frontal pole, cerebral cortex	III	0.16967026206501198
334	Frontal pole, cerebral cortex	IV	0.20836711597447324
334	Frontal pole, cerebral cortex	V	0.21659614129774685
334	Frontal pole, cerebral cortex	VI	0.22500209121182602
334	Frontal pole, cerebral cortex	crus I	0.23252854729919925
334	Frontal pole, cerebral cortex	crus II	0.254212362365316
334	Frontal pole, cerebral cortex	VIIB	0.23642745517110803
334	Frontal pole, cerebral cortex	VIIIA	0.25149990102571873
334	Frontal pole, cerebral cortex	VIIIB	0.24070635190338113
334	Frontal pole, cerebral cortex	IX	0.2705061517626567
334	Frontal pole, cerebral cortex	X	0.16675328530449804
334	Frontal pole, cerebral cortex	cerebellar nuclei	-0.033207779748328316
334	Orbital area	claustrum	0.8372206619679998
334	Orbital area	dentate gyrus	0.8140068690695885
334	Orbital area	CA1 field	0.7114736733371606
334	Orbital area	CA2 field	0.5414515122467105
334	Orbital area	CA3 field	0.4834999005171388
334	Orbital area	CA4 field	0.4017129565302187
334	Orbital area	subiculum	0.6269748646520569
334	Orbital area	cingulate gyrus	0.8283699364167075
334	Orbital area	parahippocampal gyrus	0.8628141653929238
334	Orbital area	piriform cortex	0.6669065494244918
334	Orbital area	anterior orbital gyrus	0.8258488435038732
334	Orbital area	frontal operculum	0.8090789045376565
334	Orbital area	frontal pole	0.7699764860167799
334	Orbital area	gyrus rectus	0.8903053971936329
334	Orbital area	inferior frontal gyrus	0.6574327064320669
334	Orbital area	inferior rostral gyrus	0.8662967459577396
334	Orbital area	lateral orbital gyrus	0.7396437627229713
334	Orbital area	medial orbital gyrus	0.8556212186556719
334	Orbital area	middle frontal gyrus	0.6595157791684694
334	Orbital area	paracentral lobule, anterior part	0.38882183269988235
334	Orbital area	paraterminal gyrus	0.7181430475928503
334	Orbital area	parolfactory gyri	0.8733751652169284
334	Orbital area	posterior orbital gyrus	0.8301777607761361
334	Orbital area	precentral gyrus	0.3313102081940119
334	Orbital area	superior frontal gyrus	0.7335628520468932
334	Orbital area	superior rostral gyrus	0.8602713233544678
334	Orbital area	insula	0.8657928439679975
334	Orbital area	cuneus	0.17073057639533976
334	Orbital area	inferior occipital gyrus	0.355226943150773
334	Orbital area	lingual gyrus	0.1941469216101952
334	Orbital area	occipital pole	0.24095896300859718
334	Orbital area	occipito-temporal gyrus	0.5182004059829519
334	Orbital area	superior occipital gyrus	0.34846198968247216
334	Orbital area	inferior parietal lobule	0.5761277269329399
334	Orbital area	paracentral lobule, posterior part	0.4500708818613838
334	Orbital area	postcentral gyrus	0.2730424089367541
334	Orbital area	precuneus	0.5236744342630846
334	Orbital area	superior parietal lobule	0.40452585649616857
334	Orbital area	fusiform gyrus	0.8613225316157888
334	Orbital area	Heschl's gyrus	0.47163632992203747
334	Orbital area	inferior temporal gyrus	0.8119895366824722
334	Orbital area	middle temporal gyrus	0.7425244400487608
334	Orbital area	planum polare	0.8379159087789056
334	Orbital area	planum temporale	0.5582590450573897
334	Orbital area	superior temporal gyrus	0.7027016582137802
334	Orbital area	temporal pole	0.8978040178508445
334	Orbital area	transverse gyri	0.4474952582988831
334	Orbital area	amygdala	0.5065355736813535
334	Orbital area	globus pallidus	0.0412322758721502
334	Orbital area	caudate nucleus	0.23178211422414446
334	Orbital area	nucleus accumbens	0.3021602726372728
334	Orbital area	putamen	0.1918286844545977
334	Orbital area	septal nuclei	0.1790380480366373
334	Orbital area	substantia innominata	0.09250361749040278
334	Orbital area	epithalamus	0.08617693890095315
334	Orbital area	hypothalamus	0.07156382616185523
334	Orbital area	subthalamus	-0.040197118604689
334	Orbital area	thalamus	-0.025941146299876545
334	Orbital area	inferior colliculus	-0.0640917486471739
334	Orbital area	superior colliculus	-0.022961468844422985
334	Orbital area	midbrain tegmentum	0.009793100652598613
334	Orbital area	pretectal region	0.019614376623241607
334	Orbital area	pons	-0.03161792602982994
334	Orbital area	myelencephalon	-0.005298725352974427
334	Orbital area	vermal I-II	0.08224333864774551
334	Orbital area	vermal III	0.13884249070135296
334	Orbital area	vermal IV	0.1604161073513715
334	Orbital area	vermal V	0.16583514220261356
334	Orbital area	vermal VI	0.16543845429398474
334	Orbital area	vermal VIIAf	0.18539945738583866
334	Orbital area	vermal VIIAt	0.19662858139633568
334	Orbital area	vermal VIIB	0.15904639643512056
334	Orbital area	vermal VIIIA	0.17556520490102218
334	Orbital area	vermal VIIIB	0.1377173285618385
334	Orbital area	vermal IX	0.15798821926531414
334	Orbital area	vermal X	0.05639355628123278
334	Orbital area	III	0.12660272927523042
334	Orbital area	IV	0.16250900769832938
334	Orbital area	V	0.16652420150340963
334	Orbital area	VI	0.17774195715579413
334	Orbital area	crus I	0.18407162286652407
334	Orbital area	crus II	0.19979819367321414
334	Orbital area	VIIB	0.18653818889425572
334	Orbital area	VIIIA	0.20181255163419523
334	Orbital area	VIIIB	0.19683019797103926
334	Orbital area	IX	0.21327388565721087
334	Orbital area	X	0.1262695158476164
334	Orbital area	cerebellar nuclei	-0.025774092253142453
334	Posterior parietal association areas	claustrum	0.3842023963209455
334	Posterior parietal association areas	dentate gyrus	0.3992627521644516
334	Posterior parietal association areas	CA1 field	0.3622906716821243
334	Posterior parietal association areas	CA2 field	0.21536090984922343
334	Posterior parietal association areas	CA3 field	0.2061845446124004
334	Posterior parietal association areas	CA4 field	0.09364915263642692
334	Posterior parietal association areas	subiculum	0.3425683061663787
334	Posterior parietal association areas	cingulate gyrus	0.7769502401387456
334	Posterior parietal association areas	parahippocampal gyrus	0.5050894304169223
334	Posterior parietal association areas	piriform cortex	0.07161177936701887
334	Posterior parietal association areas	anterior orbital gyrus	0.7839849291234984
334	Posterior parietal association areas	frontal operculum	0.7321367093333472
334	Posterior parietal association areas	frontal pole	0.8430270732044615
334	Posterior parietal association areas	gyrus rectus	0.6989201046634603
334	Posterior parietal association areas	inferior frontal gyrus	0.8083145708881831
334	Posterior parietal association areas	inferior rostral gyrus	0.7155178067436777
334	Posterior parietal association areas	lateral orbital gyrus	0.8115669543912327
334	Posterior parietal association areas	medial orbital gyrus	0.7412626801084907
334	Posterior parietal association areas	middle frontal gyrus	0.8489495129124165
334	Posterior parietal association areas	paracentral lobule, anterior part	0.7726880759098927
334	Posterior parietal association areas	paraterminal gyrus	0.322033448506591
334	Posterior parietal association areas	parolfactory gyri	0.47194032464375385
334	Posterior parietal association areas	posterior orbital gyrus	0.71685512348956415
334	Posterior parietal association areas	precentral gyrus	0.7608098834911124
334	Posterior parietal association areas	superior frontal gyrus	0.8239230583444007
334	Posterior parietal association areas	superior rostral gyrus	0.7493858055524735
334	Posterior parietal association areas	insula	0.6786502285713008
334	Posterior parietal association areas	cuneus	0.731877455060181
334	Posterior parietal association areas	inferior occipital gyrus	0.7952102036277853
334	Posterior parietal association areas	lingual gyrus	0.7483262824501172
334	Posterior parietal association areas	occipital pole	0.7572455966637477
334	Posterior parietal association areas	occipito-temporal gyrus	0.8153069271612198
334	Posterior parietal association areas	superior occipital gyrus	0.806080279955925
334	Posterior parietal association areas	inferior parietal lobule	0.8423181797591199
334	Posterior parietal association areas	paracentral lobule, posterior part	0.8663843940966467
334	Posterior parietal association areas	postcentral gyrus	0.7510062991061327
334	Posterior parietal association areas	precuneus	0.8558960080667564
334	Posterior parietal association areas	superior parietal lobule	0.8335679570280183
334	Posterior parietal association areas	fusiform gyrus	0.670984142257093
334	Posterior parietal association areas	Heschl's gyrus	0.804285382460521
334	Posterior parietal association areas	inferior temporal gyrus	0.7503647362872116
334	Posterior parietal association areas	middle temporal gyrus	0.7853787647472307
334	Posterior parietal association areas	planum polare	0.7015000298395545
334	Posterior parietal association areas	planum temporale	0.8836542406282523
334	Posterior parietal association areas	superior temporal gyrus	0.8072436784084565
334	Posterior parietal association areas	temporal pole	0.5300083328249797
334	Posterior parietal association areas	transverse gyri	0.7960874026481451
334	Posterior parietal association areas	amygdala	0.019104832866295704
334	Posterior parietal association areas	globus pallidus	0.025583810482103318
334	Posterior parietal association areas	caudate nucleus	-0.05320137511010432
334	Posterior parietal association areas	nucleus accumbens	-0.07442230825102437
334	Posterior parietal association areas	putamen	-0.06768594152705522
334	Posterior parietal association areas	septal nuclei	-0.0842550964941441
334	Posterior parietal association areas	substantia innominata	-0.0680885100983262
334	Posterior parietal association areas	epithalamus	0.03832374728237566
334	Posterior parietal association areas	hypothalamus	0.016092734110914227
334	Posterior parietal association areas	subthalamus	0.10367425520854708
334	Posterior parietal association areas	thalamus	0.13584778488440152
334	Posterior parietal association areas	inferior colliculus	0.06330439396803018
334	Posterior parietal association areas	superior colliculus	0.07228024529076779
334	Posterior parietal association areas	midbrain tegmentum	0.06461165766938377
334	Posterior parietal association areas	pretectal region	0.03810601723722591
334	Posterior parietal association areas	pons	0.07907590243937736
334	Posterior parietal association areas	myelencephalon	0.06593846810360458
334	Posterior parietal association areas	vermal I-II	0.1540135436847675
334	Posterior parietal association areas	vermal III	0.17072854332848722
334	Posterior parietal association areas	vermal IV	0.17749981495526232
334	Posterior parietal association areas	vermal V	0.19911768481193579
334	Posterior parietal association areas	vermal VI	0.16100630108054817
334	Posterior parietal association areas	vermal VIIAf	0.19297350900808863
334	Posterior parietal association areas	vermal VIIAt	0.17361848832842547
334	Posterior parietal association areas	vermal VIIB	0.17568216444102575
334	Posterior parietal association areas	vermal VIIIA	0.18281954499495293
334	Posterior parietal association areas	vermal VIIIB	0.17837372479588412
334	Posterior parietal association areas	vermal IX	0.17990018263740906
334	Posterior parietal association areas	vermal X	0.12621115523962007
334	Posterior parietal association areas	III	0.1830657707950611
334	Posterior parietal association areas	IV	0.168796574774655
334	Posterior parietal association areas	V	0.1810297871610636
334	Posterior parietal association areas	VI	0.18319515808547024
334	Posterior parietal association areas	crus I	0.17225542913925562
334	Posterior parietal association areas	crus II	0.16895983360425226
334	Posterior parietal association areas	VIIB	0.1731560284476588
334	Posterior parietal association areas	VIIIA	0.17357604050884362
334	Posterior parietal association areas	VIIIB	0.16043916021041735
334	Posterior parietal association areas	IX	0.16152971708551683
334	Posterior parietal association areas	X	0.14581518216990602
334	Posterior parietal association areas	cerebellar nuclei	0.0604285332088317
334	Perirhinal area	claustrum	0.8041885211131491
334	Perirhinal area	dentate gyrus	0.5615664046534864
334	Perirhinal area	CA1 field	0.560856106921839
334	Perirhinal area	CA2 field	0.5232701623333494
334	Perirhinal area	CA3 field	0.4619978923559235
334	Perirhinal area	CA4 field	0.43195337197456857
334	Perirhinal area	subiculum	0.502166334076097
334	Perirhinal area	cingulate gyrus	0.6003452998140825
334	Perirhinal area	parahippocampal gyrus	0.8055657888946437
334	Perirhinal area	piriform cortex	0.690190279330004
334	Perirhinal area	anterior orbital gyrus	0.561075208893514
334	Perirhinal area	frontal operculum	0.6176156687105561
334	Perirhinal area	frontal pole	0.5194862639549708
334	Perirhinal area	gyrus rectus	0.6780015120253565
334	Perirhinal area	inferior frontal gyrus	0.42501969136381323
334	Perirhinal area	inferior rostral gyrus	0.6908680652126745
334	Perirhinal area	lateral orbital gyrus	0.5066780628657762
334	Perirhinal area	medial orbital gyrus	0.6411923539767556
334	Perirhinal area	middle frontal gyrus	0.397691412021432
334	Perirhinal area	paracentral lobule, anterior part	0.11265497860699901
334	Perirhinal area	paraterminal gyrus	0.5286844156247932
334	Perirhinal area	parolfactory gyri	0.7105496589826569
334	Perirhinal area	posterior orbital gyrus	0.602730702766862
334	Perirhinal area	precentral gyrus	0.05827033149186259
334	Perirhinal area	superior frontal gyrus	0.47604809183778735
334	Perirhinal area	superior rostral gyrus	0.615087673267674
334	Perirhinal area	insula	0.7014373520613664
334	Perirhinal area	cuneus	-0.016846466741391158
334	Perirhinal area	inferior occipital gyrus	0.12706964732153014
334	Perirhinal area	lingual gyrus	0.02728781815152575
334	Perirhinal area	occipital pole	0.056880485779574996
334	Perirhinal area	occipito-temporal gyrus	0.2820796205255346
334	Perirhinal area	superior occipital gyrus	0.11558277293076016
334	Perirhinal area	inferior parietal lobule	0.3395533496451766
334	Perirhinal area	paracentral lobule, posterior part	0.24116041533588956
334	Perirhinal area	postcentral gyrus	0.02259207891258792
334	Perirhinal area	precuneus	0.2679507977710408
334	Perirhinal area	superior parietal lobule	0.15434725234440205
334	Perirhinal area	fusiform gyrus	0.7074915995576551
334	Perirhinal area	Heschl's gyrus	0.23733927999457774
334	Perirhinal area	inferior temporal gyrus	0.6393031209531168
334	Perirhinal area	middle temporal gyrus	0.5226562564428813
334	Perirhinal area	planum polare	0.6245235328567578
334	Perirhinal area	planum temporale	0.32414947293960567
334	Perirhinal area	superior temporal gyrus	0.4761009161199986
334	Perirhinal area	temporal pole	0.785586453287142
334	Perirhinal area	transverse gyri	0.21553703097321597
334	Perirhinal area	amygdala	0.4445049949781059
334	Perirhinal area	globus pallidus	-0.06888697676543122
334	Perirhinal area	caudate nucleus	0.1489841640083472
334	Perirhinal area	nucleus accumbens	0.20921040771947347
334	Perirhinal area	putamen	0.11511732648958128
334	Perirhinal area	septal nuclei	0.038309307047759304
334	Perirhinal area	substantia innominata	-0.003228392952199012
334	Perirhinal area	epithalamus	-0.08542845031075219
334	Perirhinal area	hypothalamus	-0.030374251230031832
334	Perirhinal area	subthalamus	-0.16879267842741727
334	Perirhinal area	thalamus	-0.16014802736075606
334	Perirhinal area	inferior colliculus	-0.16798848826304055
334	Perirhinal area	superior colliculus	-0.16166285541820666
334	Perirhinal area	midbrain tegmentum	-0.12945905582003975
334	Perirhinal area	pretectal region	-0.10699960573273339
334	Perirhinal area	pons	-0.17013079909425552
334	Perirhinal area	myelencephalon	-0.14458239288734479
334	Perirhinal area	vermal I-II	-0.03117421679299766
334	Perirhinal area	vermal III	0.08550164498820095
334	Perirhinal area	vermal IV	0.1130849824132055
334	Perirhinal area	vermal V	0.1296152876168575
334	Perirhinal area	vermal VI	0.10999816081965602
334	Perirhinal area	vermal VIIAf	0.14184268334021677
334	Perirhinal area	vermal VIIAt	0.16393776964078896
334	Perirhinal area	vermal VIIB	0.09626708822442875
334	Perirhinal area	vermal VIIIA	0.13291482054496148
334	Perirhinal area	vermal VIIIB	0.06702057548151409
334	Perirhinal area	vermal IX	0.08910472867808343
334	Perirhinal area	vermal X	-0.0810666764797586
334	Perirhinal area	III	0.05837695580876372
334	Perirhinal area	IV	0.112194185516683
334	Perirhinal area	V	0.1271176918392256
334	Perirhinal area	VI	0.13865382567121923
334	Perirhinal area	crus I	0.1418771278447405
334	Perirhinal area	crus II	0.15691344319696698
334	Perirhinal area	VIIB	0.14566080786181088
334	Perirhinal area	VIIIA	0.1752886633362489
334	Perirhinal area	VIIIB	0.14751533298888037
334	Perirhinal area	IX	0.16130571044180322
334	Perirhinal area	X	0.05400418998329135
334	Perirhinal area	cerebellar nuclei	-0.1609787707526996
334	Primary somatosensory area	claustrum	0.42535504533906926
334	Primary somatosensory area	dentate gyrus	0.20180027624071653
334	Primary somatosensory area	CA1 field	-0.052652953107509996
334	Primary somatosensory area	CA2 field	-0.15960718950708536
334	Primary somatosensory area	CA3 field	-0.1720300823913929
334	Primary somatosensory area	CA4 field	-0.24578005110430698
334	Primary somatosensory area	subiculum	-0.17382008803058702
334	Primary somatosensory area	cingulate gyrus	0.6509687790067182
334	Primary somatosensory area	parahippocampal gyrus	0.22671662523201835
334	Primary somatosensory area	piriform cortex	-0.15985959406096772
334	Primary somatosensory area	anterior orbital gyrus	0.6787633235469193
334	Primary somatosensory area	frontal operculum	0.7140273922633542
334	Primary somatosensory area	frontal pole	0.720047916715736
334	Primary somatosensory area	gyrus rectus	0.545557001114423
334	Primary somatosensory area	inferior frontal gyrus	0.8574450573506748
334	Primary somatosensory area	inferior rostral gyrus	0.526561855434654
334	Primary somatosensory area	lateral orbital gyrus	0.7900758365880494
334	Primary somatosensory area	medial orbital gyrus	0.6115032038508214
334	Primary somatosensory area	middle frontal gyrus	0.8173488089904245
334	Primary somatosensory area	paracentral lobule, anterior part	0.9351807096155031
334	Primary somatosensory area	paraterminal gyrus	0.001377704799002406
334	Primary somatosensory area	parolfactory gyri	0.20231870693612694
334	Primary somatosensory area	posterior orbital gyrus	0.7119191265383872
334	Primary somatosensory area	precentral gyrus	0.9217582538470047
334	Primary somatosensory area	superior frontal gyrus	0.7705926043703615
334	Primary somatosensory area	superior rostral gyrus	0.5910693924405038
334	Primary somatosensory area	insula	0.5792222852648524
334	Primary somatosensory area	cuneus	0.9220014269993639
334	Primary somatosensory area	inferior occipital gyrus	0.94013598597114445
334	Primary somatosensory area	lingual gyrus	0.9287657021246777
334	Primary somatosensory area	occipital pole	0.9420463627991024
334	Primary somatosensory area	occipito-temporal gyrus	0.9203524503956655
334	Primary somatosensory area	superior occipital gyrus	0.9307523719515981
334	Primary somatosensory area	inferior parietal lobule	0.8841553773231302
334	Primary somatosensory area	paracentral lobule, posterior part	0.8616713559365045
334	Primary somatosensory area	postcentral gyrus	0.9360427168698017
334	Primary somatosensory area	precuneus	0.891825249827963
334	Primary somatosensory area	superior parietal lobule	0.9163469132697568
334	Primary somatosensory area	fusiform gyrus	0.5628550446907384
334	Primary somatosensory area	Heschl's gyrus	0.9325001546943521
334	Primary somatosensory area	inferior temporal gyrus	0.6812401290012181
334	Primary somatosensory area	middle temporal gyrus	0.7960489257927859
334	Primary somatosensory area	planum polare	0.6729988642653786
334	Primary somatosensory area	planum temporale	0.8521063112174002
334	Primary somatosensory area	superior temporal gyrus	0.8191378715494548
334	Primary somatosensory area	temporal pole	0.32539254156595376
334	Primary somatosensory area	transverse gyri	0.946327846877274
334	Primary somatosensory area	amygdala	-0.22698668947225462
334	Primary somatosensory area	globus pallidus	0.05071283968821232
334	Primary somatosensory area	caudate nucleus	0.28715958472813535
334	Primary somatosensory area	nucleus accumbens	0.1423640076983243
334	Primary somatosensory area	putamen	0.2912739326368001
334	Primary somatosensory area	septal nuclei	-0.14230117708705964
334	Primary somatosensory area	substantia innominata	-0.09794423491124016
334	Primary somatosensory area	epithalamus	-0.026515443412274218
334	Primary somatosensory area	hypothalamus	-0.16384125646161263
334	Primary somatosensory area	subthalamus	0.023318826233154576
334	Primary somatosensory area	thalamus	0.013324348076061976
334	Primary somatosensory area	inferior colliculus	0.059925344162756126
334	Primary somatosensory area	superior colliculus	-0.02733390609629169
334	Primary somatosensory area	midbrain tegmentum	-0.023423414941332942
334	Primary somatosensory area	pretectal region	-0.023583752279246376
334	Primary somatosensory area	pons	-0.01177312090690879
334	Primary somatosensory area	myelencephalon	0.01428526358220547
334	Primary somatosensory area	vermal I-II	0.05547321900284841
334	Primary somatosensory area	vermal III	0.02266457493736835
334	Primary somatosensory area	vermal IV	0.009646459728716696
334	Primary somatosensory area	vermal V	0.016499333371299933
334	Primary somatosensory area	vermal VI	0.005033674221574704
334	Primary somatosensory area	vermal VIIAf	0.014026847306563468
334	Primary somatosensory area	vermal VIIAt	0.015583086013415043
334	Primary somatosensory area	vermal VIIB	0.04121685683800515
334	Primary somatosensory area	vermal VIIIA	0.017352452766894524
334	Primary somatosensory area	vermal VIIIB	0.03933673341069215
334	Primary somatosensory area	vermal IX	0.022390408511154248
334	Primary somatosensory area	vermal X	0.016942770960000565
334	Primary somatosensory area	III	0.010169024022967914
334	Primary somatosensory area	IV	0.010750686181112764
334	Primary somatosensory area	V	0.004898139425682206
334	Primary somatosensory area	VI	-0.001651115589037171
334	Primary somatosensory area	crus I	0.006551910522309619
334	Primary somatosensory area	crus II	0.013839879091552997
334	Primary somatosensory area	VIIB	0.010457058118864168
334	Primary somatosensory area	VIIIA	0.014071866973731379
334	Primary somatosensory area	VIIIB	0.008261502817251267
334	Primary somatosensory area	IX	0.038135189337259165
334	Primary somatosensory area	X	0.00945538819370895
334	Primary somatosensory area	cerebellar nuclei	0.051618105362127374
334	Supplemental somatosensory area	claustrum	0.6551436686433724
334	Supplemental somatosensory area	dentate gyrus	0.28756059664481354
334	Supplemental somatosensory area	CA1 field	-0.004059784207936528
334	Supplemental somatosensory area	CA2 field	-0.08809837503443729
334	Supplemental somatosensory area	CA3 field	-0.11707445315927947
334	Supplemental somatosensory area	CA4 field	-0.16259947923186258
334	Supplemental somatosensory area	subiculum	-0.14230531443164823
334	Supplemental somatosensory area	cingulate gyrus	0.6481361920551317
334	Supplemental somatosensory area	parahippocampal gyrus	0.3741836203109713
334	Supplemental somatosensory area	piriform cortex	0.08825620620017478
334	Supplemental somatosensory area	anterior orbital gyrus	0.6610318234691114
334	Supplemental somatosensory area	frontal operculum	0.739931310005242
334	Supplemental somatosensory area	frontal pole	0.664675103058964
334	Supplemental somatosensory area	gyrus rectus	0.6055983902526397
334	Supplemental somatosensory area	inferior frontal gyrus	0.7790842169102833
334	Supplemental somatosensory area	inferior rostral gyrus	0.5836057185590022
334	Supplemental somatosensory area	lateral orbital gyrus	0.7443108951059887
334	Supplemental somatosensory area	medial orbital gyrus	0.642470039453267
334	Supplemental somatosensory area	middle frontal gyrus	0.7046512373133619
334	Supplemental somatosensory area	paracentral lobule, anterior part	0.7250526405731962
334	Supplemental somatosensory area	paraterminal gyrus	0.09814612161248762
334	Supplemental somatosensory area	parolfactory gyri	0.3328544929966521
334	Supplemental somatosensory area	posterior orbital gyrus	0.7346651743676835
334	Supplemental somatosensory area	precentral gyrus	0.6864143084385438
334	Supplemental somatosensory area	superior frontal gyrus	0.6971819533770023
334	Supplemental somatosensory area	superior rostral gyrus	0.6107166087701982
334	Supplemental somatosensory area	insula	0.6595254696535691
334	Supplemental somatosensory area	cuneus	0.6820038706506938
334	Supplemental somatosensory area	inferior occipital gyrus	0.7405202090704313
334	Supplemental somatosensory area	lingual gyrus	0.703530147455065
334	Supplemental somatosensory area	occipital pole	0.7290605864901747
334	Supplemental somatosensory area	occipito-temporal gyrus	0.7797980684165888
334	Supplemental somatosensory area	superior occipital gyrus	0.723237682240137
334	Supplemental somatosensory area	inferior parietal lobule	0.7601083064981149
334	Supplemental somatosensory area	paracentral lobule, posterior part	0.6788048562703839
334	Supplemental somatosensory area	postcentral gyrus	0.6993542346377203
334	Supplemental somatosensory area	precuneus	0.7295598569365402
334	Supplemental somatosensory area	superior parietal lobule	0.7124331683818166
334	Supplemental somatosensory area	fusiform gyrus	0.6415680444783933
334	Supplemental somatosensory area	Heschl's gyrus	0.7799921829181476
334	Supplemental somatosensory area	inferior temporal gyrus	0.7087594519814134
334	Supplemental somatosensory area	middle temporal gyrus	0.764710741150432
334	Supplemental somatosensory area	planum polare	0.712516298949381
334	Supplemental somatosensory area	planum temporale	0.7064175647876313
334	Supplemental somatosensory area	superior temporal gyrus	0.7617749877511433
334	Supplemental somatosensory area	temporal pole	0.47427712448035686
334	Supplemental somatosensory area	transverse gyri	0.7893941284505523
334	Supplemental somatosensory area	amygdala	-0.07224157361543851
334	Supplemental somatosensory area	globus pallidus	-7.844234028765631e-4
334	Supplemental somatosensory area	caudate nucleus	0.4031198698235978
334	Supplemental somatosensory area	nucleus accumbens	0.28117179164834577
334	Supplemental somatosensory area	putamen	0.3983102758177286
334	Supplemental somatosensory area	septal nuclei	-0.10925627990014523
334	Supplemental somatosensory area	substantia innominata	-0.07831159148687089
334	Supplemental somatosensory area	epithalamus	-0.08854771659149331
334	Supplemental somatosensory area	hypothalamus	-0.19835391699130273
334	Supplemental somatosensory area	subthalamus	-0.09398803185422573
334	Supplemental somatosensory area	thalamus	-0.07790717459016752
334	Supplemental somatosensory area	inferior colliculus	-0.013685217618604186
334	Supplemental somatosensory area	superior colliculus	-0.10912541253824101
334	Supplemental somatosensory area	midbrain tegmentum	-0.11532114760127243
334	Supplemental somatosensory area	pretectal region	-0.0876029751959006
334	Supplemental somatosensory area	pons	-0.1280178326950739
334	Supplemental somatosensory area	myelencephalon	-0.0895875156438045
334	Supplemental somatosensory area	vermal I-II	-0.04509137248220329
334	Supplemental somatosensory area	vermal III	-0.04559002689486178
334	Supplemental somatosensory area	vermal IV	-0.05184038475184082
334	Supplemental somatosensory area	vermal V	-0.04726606626844924
334	Supplemental somatosensory area	vermal VI	-0.054748130682233755
334	Supplemental somatosensory area	vermal VIIAf	-0.04265999603588367
334	Supplemental somatosensory area	vermal VIIAt	-0.026871865562100642
334	Supplemental somatosensory area	vermal VIIB	-0.025430686863349344
334	Supplemental somatosensory area	vermal VIIIA	-0.03764804366109501
334	Supplemental somatosensory area	vermal VIIIB	-0.03463778115677755
334	Supplemental somatosensory area	vermal IX	-0.04982671905852681
334	Supplemental somatosensory area	vermal X	-0.08764213119004005
334	Supplemental somatosensory area	III	-0.07131434454650332
334	Supplemental somatosensory area	IV	-0.05124617006633728
334	Supplemental somatosensory area	V	-0.05638542222964843
334	Supplemental somatosensory area	VI	-0.058813213424463856
334	Supplemental somatosensory area	crus I	-0.04592473929530971
334	Supplemental somatosensory area	crus II	-0.03340740570229896
334	Supplemental somatosensory area	VIIB	-0.04113849269448949
334	Supplemental somatosensory area	VIIIA	-0.02791858914860246
334	Supplemental somatosensory area	VIIIB	-0.03897943821957771
334	Supplemental somatosensory area	IX	-0.004413398830397109
334	Supplemental somatosensory area	X	-0.06621800444271363
334	Supplemental somatosensory area	cerebellar nuclei	-0.04769087848569155
334	Temporal association areas	claustrum	0.8286733712072265
334	Temporal association areas	dentate gyrus	0.508871679064539
334	Temporal association areas	CA1 field	0.3596885429114712
334	Temporal association areas	CA2 field	0.264649920555312
334	Temporal association areas	CA3 field	0.2183997755124915
334	Temporal association areas	CA4 field	0.16208975995034536
334	Temporal association areas	subiculum	0.26429825632062687
334	Temporal association areas	cingulate gyrus	0.7854628592777323
334	Temporal association areas	parahippocampal gyrus	0.7243424691840771
334	Temporal association areas	piriform cortex	0.4471855088963184
334	Temporal association areas	anterior orbital gyrus	0.7694427554647387
334	Temporal association areas	frontal operculum	0.8251554381145086
334	Temporal association areas	frontal pole	0.7656808098922725
334	Temporal association areas	gyrus rectus	0.7999916855557493
334	Temporal association areas	inferior frontal gyrus	0.7448511816089312
334	Temporal association areas	inferior rostral gyrus	0.8034498558859952
334	Temporal association areas	lateral orbital gyrus	0.7842058119139639
334	Temporal association areas	medial orbital gyrus	0.8028399338855338
334	Temporal association areas	middle frontal gyrus	0.7008452984369964
334	Temporal association areas	paracentral lobule, anterior part	0.5143749304485696
334	Temporal association areas	paraterminal gyrus	0.40076898220617385
334	Temporal association areas	parolfactory gyri	0.6421123623635723
334	Temporal association areas	posterior orbital gyrus	0.8083573921486434
334	Temporal association areas	precentral gyrus	0.46044384085001555
334	Temporal association areas	superior frontal gyrus	0.7378294258678592
334	Temporal association areas	superior rostral gyrus	0.7763777071475576
334	Temporal association areas	insula	0.8344409051271859
334	Temporal association areas	cuneus	0.42951271725282314
334	Temporal association areas	inferior occipital gyrus	0.5492987133737526
334	Temporal association areas	lingual gyrus	0.4721378093173886
334	Temporal association areas	occipital pole	0.5027800244384204
334	Temporal association areas	occipito-temporal gyrus	0.6619326860048479
334	Temporal association areas	superior occipital gyrus	0.5379177613789974
334	Temporal association areas	inferior parietal lobule	0.6944959139085594
334	Temporal association areas	paracentral lobule, posterior part	0.6057070325370956
334	Temporal association areas	postcentral gyrus	0.4507536051310783
334	Temporal association areas	precuneus	0.6417511192336426
334	Temporal association areas	superior parietal lobule	0.559777367483454
334	Temporal association areas	fusiform gyrus	0.8222170461508512
334	Temporal association areas	Heschl's gyrus	0.6356369587410171
334	Temporal association areas	inferior temporal gyrus	0.8313116940014587
334	Temporal association areas	middle temporal gyrus	0.7911473952685977
334	Temporal association areas	planum polare	0.8083669801906161
334	Temporal association areas	planum temporale	0.6774430438381667
334	Temporal association areas	superior temporal gyrus	0.7668473924358764
334	Temporal association areas	temporal pole	0.765285315859087
334	Temporal association areas	transverse gyri	0.626676505624672
334	Temporal association areas	amygdala	0.20899501561471717
334	Temporal association areas	globus pallidus	-0.09065663660374096
334	Temporal association areas	caudate nucleus	0.2309521173031202
334	Temporal association areas	nucleus accumbens	0.20748757923463398
334	Temporal association areas	putamen	0.20494581074348373
334	Temporal association areas	septal nuclei	-0.08158776047128852
334	Temporal association areas	substantia innominata	-0.09155895410545223
334	Temporal association areas	epithalamus	-0.13154258164496985
334	Temporal association areas	hypothalamus	-0.14818049802849445
334	Temporal association areas	subthalamus	-0.1748906131042456
334	Temporal association areas	thalamus	-0.12621782131504966
334	Temporal association areas	inferior colliculus	-0.11992998556810104
334	Temporal association areas	superior colliculus	-0.16573638665365995
334	Temporal association areas	midbrain tegmentum	-0.17193270773287722
334	Temporal association areas	pretectal region	-0.14121890863248882
334	Temporal association areas	pons	-0.20247172275291245
334	Temporal association areas	myelencephalon	-0.1726199143186114
334	Temporal association areas	vermal I-II	-0.04443655397125237
334	Temporal association areas	vermal III	0.04087484297669404
334	Temporal association areas	vermal IV	0.05772435925796573
334	Temporal association areas	vermal V	0.07542130791633765
334	Temporal association areas	vermal VI	0.046947493600518496
334	Temporal association areas	vermal VIIAf	0.08333442327374625
334	Temporal association areas	vermal VIIAt	0.10096967214070376
334	Temporal association areas	vermal VIIB	0.05768346396417687
334	Temporal association areas	vermal VIIIA	0.07963337265498292
334	Temporal association areas	vermal VIIIB	0.037593330228130994
334	Temporal association areas	vermal IX	0.042638373677368537
334	Temporal association areas	vermal X	-0.09383257530998616
334	Temporal association areas	III	0.01231231998207657
334	Temporal association areas	IV	0.049962347188411256
334	Temporal association areas	V	0.06257682497069762
334	Temporal association areas	VI	0.07085439896450257
334	Temporal association areas	crus I	0.07594891590567777
334	Temporal association areas	crus II	0.0884458433803708
334	Temporal association areas	VIIB	0.07957238400027969
334	Temporal association areas	VIIIA	0.105503080856079
334	Temporal association areas	VIIIB	0.07594681310919754
334	Temporal association areas	IX	0.10005790685615217
334	Temporal association areas	X	0.0015496910250981048
334	Temporal association areas	cerebellar nuclei	-0.15642177068391647
334	Visual areas	claustrum	0.44274622421712756
334	Visual areas	dentate gyrus	0.27371247184480463
334	Visual areas	CA1 field	0.14162709830809647
334	Visual areas	CA2 field	0.0229090961170623
334	Visual areas	CA3 field	0.012418948302248918
334	Visual areas	CA4 field	-0.07636927938411507
334	Visual areas	subiculum	0.08712790897930515
334	Visual areas	cingulate gyrus	0.7355173926091181
334	Visual areas	parahippocampal gyrus	0.41802284941102774
334	Visual areas	piriform cortex	-0.005687834132168645
334	Visual areas	anterior orbital gyrus	0.7424631532904356
334	Visual areas	frontal operculum	0.7399902287348609
334	Visual areas	frontal pole	0.8124719799111081
334	Visual areas	gyrus rectus	0.6499198927730578
334	Visual areas	inferior frontal gyrus	0.8359720158703449
334	Visual areas	inferior rostral gyrus	0.6609407184459212
334	Visual areas	lateral orbital gyrus	0.8210348213410272
334	Visual areas	medial orbital gyrus	0.7030383321106362
334	Visual areas	middle frontal gyrus	0.8326373920667257
334	Visual areas	paracentral lobule, anterior part	0.8088065703709465
334	Visual areas	paraterminal gyrus	0.14911611713695655
334	Visual areas	parolfactory gyri	0.3531054498805383
334	Visual areas	posterior orbital gyrus	0.7197018419932016
334	Visual areas	precentral gyrus	0.7925098422369167
334	Visual areas	superior frontal gyrus	0.7984741065172252
334	Visual areas	superior rostral gyrus	0.6932634955749615
334	Visual areas	insula	0.6624334516999745
334	Visual areas	cuneus	0.8270962932664759
334	Visual areas	inferior occipital gyrus	0.863058710443294
334	Visual areas	lingual gyrus	0.8520722760381947
334	Visual areas	occipital pole	0.8568682691986221
334	Visual areas	occipito-temporal gyrus	0.8674227815134689
334	Visual areas	superior occipital gyrus	0.866338343618894
334	Visual areas	inferior parietal lobule	0.8708607099313902
334	Visual areas	paracentral lobule, posterior part	0.8729058521015938
334	Visual areas	postcentral gyrus	0.8125023580309437
334	Visual areas	precuneus	0.878197849132169
334	Visual areas	superior parietal lobule	0.8704198067813907
334	Visual areas	fusiform gyrus	0.6481595692922284
334	Visual areas	Heschl's gyrus	0.8689327660773446
334	Visual areas	inferior temporal gyrus	0.747266599957403
334	Visual areas	middle temporal gyrus	0.8020693718427943
334	Visual areas	planum polare	0.6963428329871532
334	Visual areas	planum temporale	0.8945320791234728
334	Visual areas	superior temporal gyrus	0.8219110528714562
334	Visual areas	temporal pole	0.4681326818376475
334	Visual areas	transverse gyri	0.8706494454007944
334	Visual areas	amygdala	-0.11665925516008135
334	Visual areas	globus pallidus	-0.0036062874843635056
334	Visual areas	caudate nucleus	0.05981334564022073
334	Visual areas	nucleus accumbens	-0.023014083622003807
334	Visual areas	putamen	0.054598626024438796
334	Visual areas	septal nuclei	-0.18525055425679302
334	Visual areas	substantia innominata	-0.13546937879679002
334	Visual areas	epithalamus	-0.056859755498281365
334	Visual areas	hypothalamus	-0.11859493177535115
334	Visual areas	subthalamus	0.030192210696544607
334	Visual areas	thalamus	0.0853726726747242
334	Visual areas	inferior colliculus	0.04132790842476292
334	Visual areas	superior colliculus	-0.006418253695048254
334	Visual areas	midbrain tegmentum	-0.03306148636896217
334	Visual areas	pretectal region	-0.035989378291333696
334	Visual areas	pons	-0.01977590482999371
334	Visual areas	myelencephalon	-0.019015282889930273
334	Visual areas	vermal I-II	0.09177408902756909
334	Visual areas	vermal III	0.11409296600301451
334	Visual areas	vermal IV	0.11648865768742624
334	Visual areas	vermal V	0.13950934350465274
334	Visual areas	vermal VI	0.09716769170414423
334	Visual areas	vermal VIIAf	0.1305431422220364
334	Visual areas	vermal VIIAt	0.12364740385379407
334	Visual areas	vermal VIIB	0.12130007204289467
334	Visual areas	vermal VIIIA	0.1263155152600743
334	Visual areas	vermal VIIIB	0.1208753963450836
334	Visual areas	vermal IX	0.11090491196206871
334	Visual areas	vermal X	0.045319375371279086
334	Visual areas	III	0.11826604044079138
334	Visual areas	IV	0.1111378952175466
334	Visual areas	V	0.12011327735255437
334	Visual areas	VI	0.11919012746906706
334	Visual areas	crus I	0.11242595530328858
334	Visual areas	crus II	0.11112265985902017
334	Visual areas	VIIB	0.11419296319650875
334	Visual areas	VIIIA	0.12096810468266006
334	Visual areas	VIIIB	0.0998557405010028
334	Visual areas	IX	0.11348116145794906
334	Visual areas	X	0.07919043484087891
334	Visual areas	cerebellar nuclei	0.0108279661630739
334	Pallidum	claustrum	0.34955990275192506
334	Pallidum	dentate gyrus	0.45048536703256015
334	Pallidum	CA1 field	0.3414168672231232
334	Pallidum	CA2 field	0.4791203234975552
334	Pallidum	CA3 field	0.5105834345633041
334	Pallidum	CA4 field	0.5720500147319846
334	Pallidum	subiculum	0.34645180515371865
334	Pallidum	cingulate gyrus	0.1081447811779982
334	Pallidum	parahippocampal gyrus	0.26463860137809925
334	Pallidum	piriform cortex	0.569312063050192
334	Pallidum	anterior orbital gyrus	0.094134538593555
334	Pallidum	frontal operculum	0.12709179283145475
334	Pallidum	frontal pole	-0.026424902868727142
334	Pallidum	gyrus rectus	0.14713480686405503
334	Pallidum	inferior frontal gyrus	0.03062647087079308
334	Pallidum	inferior rostral gyrus	0.16333398057399576
334	Pallidum	lateral orbital gyrus	0.04188587788025272
334	Pallidum	medial orbital gyrus	0.14316141648675024
334	Pallidum	middle frontal gyrus	0.004417499616718465
334	Pallidum	paracentral lobule, anterior part	-0.0630745874817759
334	Pallidum	paraterminal gyrus	0.524909829418351
334	Pallidum	parolfactory gyri	0.357062349355126
334	Pallidum	posterior orbital gyrus	0.12091206011489276
334	Pallidum	precentral gyrus	-0.1064453789755484
334	Pallidum	superior frontal gyrus	0.03533418591689498
334	Pallidum	superior rostral gyrus	0.15989154585001003
334	Pallidum	insula	0.19098699245518017
334	Pallidum	cuneus	-0.0679709532850782
334	Pallidum	inferior occipital gyrus	-0.06901588399066143
334	Pallidum	lingual gyrus	-0.0856754802200129
334	Pallidum	occipital pole	-0.06192450395455014
334	Pallidum	occipito-temporal gyrus	-0.021034456351840803
334	Pallidum	superior occipital gyrus	-0.05059328745332158
334	Pallidum	inferior parietal lobule	-0.00436174843970833
334	Pallidum	paracentral lobule, posterior part	-0.02208172089046203
334	Pallidum	postcentral gyrus	-0.08636632431336949
334	Pallidum	precuneus	-0.05075642162451386
334	Pallidum	superior parietal lobule	-0.08234681745595353
334	Pallidum	fusiform gyrus	0.20867801057072047
334	Pallidum	Heschl's gyrus	-0.03751375219462138
334	Pallidum	inferior temporal gyrus	0.13160466275689586
334	Pallidum	middle temporal gyrus	0.06258431210313048
334	Pallidum	planum polare	0.1830858645769805
334	Pallidum	planum temporale	-0.062232225208652625
334	Pallidum	superior temporal gyrus	0.06685823924350091
334	Pallidum	temporal pole	0.25487556701827346
334	Pallidum	transverse gyri	-0.054033665644031
334	Pallidum	amygdala	0.723890663778593
334	Pallidum	globus pallidus	0.5627015419066999
334	Pallidum	caudate nucleus	0.7767933496612199
334	Pallidum	nucleus accumbens	0.8641747074286583
334	Pallidum	putamen	0.7698755686056629
334	Pallidum	septal nuclei	0.8740714548450317
334	Pallidum	substantia innominata	0.9145436944721869
334	Pallidum	epithalamus	0.6257190319123238
334	Pallidum	hypothalamus	0.7645265051555411
334	Pallidum	subthalamus	0.43530067007495626
334	Pallidum	thalamus	0.47355109344026836
334	Pallidum	inferior colliculus	0.5439027570771353
334	Pallidum	superior colliculus	0.5553885694485668
334	Pallidum	midbrain tegmentum	0.5597323870953675
334	Pallidum	pretectal region	0.5996335768612135
334	Pallidum	pons	0.4325184363259508
334	Pallidum	myelencephalon	0.4466656270930486
334	Pallidum	vermal I-II	0.18699697010205624
334	Pallidum	vermal III	-0.002387606341349774
334	Pallidum	vermal IV	-0.041956862538084894
334	Pallidum	vermal V	-0.10136037147100617
334	Pallidum	vermal VI	-0.006167902688903429
334	Pallidum	vermal VIIAf	-0.06671951226220657
334	Pallidum	vermal VIIAt	-0.11356734774438797
334	Pallidum	vermal VIIB	-0.024058807286068875
334	Pallidum	vermal VIIIA	-0.07265234223954192
334	Pallidum	vermal VIIIB	0.03774629331985539
334	Pallidum	vermal IX	-0.04089894942545544
334	Pallidum	vermal X	0.23252436045609468
334	Pallidum	III	0.003435231863483297
334	Pallidum	IV	-0.05453040869019369
334	Pallidum	V	-0.09584260063869135
334	Pallidum	VI	-0.1020688231848124
334	Pallidum	crus I	-0.10847272249579278
334	Pallidum	crus II	-0.12758474568941686
334	Pallidum	VIIB	-0.10782491219528922
334	Pallidum	VIIIA	-0.1407658453353055
334	Pallidum	VIIIB	-0.0650589096317755
334	Pallidum	IX	-0.12474955912490797
334	Pallidum	X	0.003493968968479532
334	Pallidum	cerebellar nuclei	0.4066986211566941
334	Striatum ventral region	claustrum	0.5641463796887275
334	Striatum ventral region	dentate gyrus	0.6036956938751282
334	Striatum ventral region	CA1 field	0.46983194215244456
334	Striatum ventral region	CA2 field	0.5315198731847276
334	Striatum ventral region	CA3 field	0.5292965708688832
334	Striatum ventral region	CA4 field	0.5799204736841901
334	Striatum ventral region	subiculum	0.4163133109484509
334	Striatum ventral region	cingulate gyrus	0.26576582743681076
334	Striatum ventral region	parahippocampal gyrus	0.457708695028584
334	Striatum ventral region	piriform cortex	0.7626173141575624
334	Striatum ventral region	anterior orbital gyrus	0.24950004229481254
334	Striatum ventral region	frontal operculum	0.288344054308965
334	Striatum ventral region	frontal pole	0.12195051131506711
334	Striatum ventral region	gyrus rectus	0.33253308732068093
334	Striatum ventral region	inferior frontal gyrus	0.14060055624097167
334	Striatum ventral region	inferior rostral gyrus	0.3312445712942464
334	Striatum ventral region	lateral orbital gyrus	0.18775115494285327
334	Striatum ventral region	medial orbital gyrus	0.31057258507882823
334	Striatum ventral region	middle frontal gyrus	0.09761190433447418
334	Striatum ventral region	paracentral lobule, anterior part	-0.03801208480516003
334	Striatum ventral region	paraterminal gyrus	0.6374802962752907
334	Striatum ventral region	parolfactory gyri	0.5341036577186004
334	Striatum ventral region	posterior orbital gyrus	0.2991483761653887
334	Striatum ventral region	precentral gyrus	-0.10035654065656707
334	Striatum ventral region	superior frontal gyrus	0.15460657978192802
334	Striatum ventral region	superior rostral gyrus	0.3188188306952177
334	Striatum ventral region	insula	0.3736558701381068
334	Striatum ventral region	cuneus	-0.09524507937198246
334	Striatum ventral region	inferior occipital gyrus	-0.04720303638030087
334	Striatum ventral region	lingual gyrus	-0.09787905058165862
334	Striatum ventral region	occipital pole	-0.06058609416874376
334	Striatum ventral region	occipito-temporal gyrus	0.0529813333992864
334	Striatum ventral region	superior occipital gyrus	-0.036444421715030456
334	Striatum ventral region	inferior parietal lobule	0.07427624563803607
334	Striatum ventral region	paracentral lobule, posterior part	-0.003899841877762735
334	Striatum ventral region	postcentral gyrus	-0.09366290520662035
334	Striatum ventral region	precuneus	0.015668139972575226
334	Striatum ventral region	superior parietal lobule	-0.053949477658326896
334	Striatum ventral region	fusiform gyrus	0.37959243801603493
334	Striatum ventral region	Heschl's gyrus	0.021485501082223597
334	Striatum ventral region	inferior temporal gyrus	0.2869972284772412
334	Striatum ventral region	middle temporal gyrus	0.20219800795921208
334	Striatum ventral region	planum polare	0.35117348540996507
334	Striatum ventral region	planum temporale	0.012182208517247791
334	Striatum ventral region	superior temporal gyrus	0.18468273812814176
334	Striatum ventral region	temporal pole	0.45599487480768147
334	Striatum ventral region	transverse gyri	0.006666854205414753
334	Striatum ventral region	amygdala	0.7982061306323293
334	Striatum ventral region	globus pallidus	0.3723720737660259
334	Striatum ventral region	caudate nucleus	0.8459253571232176
334	Striatum ventral region	nucleus accumbens	0.9308198194703199
334	Striatum ventral region	putamen	0.8180334760209604
334	Striatum ventral region	septal nuclei	0.7375529177905148
334	Striatum ventral region	substantia innominata	0.7088878882916108
334	Striatum ventral region	epithalamus	0.4111451774369748
334	Striatum ventral region	hypothalamus	0.4855925775415658
334	Striatum ventral region	subthalamus	0.1802760612218081
334	Striatum ventral region	thalamus	0.25939250260812635
334	Striatum ventral region	inferior colliculus	0.34189148274453957
334	Striatum ventral region	superior colliculus	0.3184420613004116
334	Striatum ventral region	midbrain tegmentum	0.2816470280258212
334	Striatum ventral region	pretectal region	0.36826824937041447
334	Striatum ventral region	pons	0.1601183053847761
334	Striatum ventral region	myelencephalon	0.2040407751727629
334	Striatum ventral region	vermal I-II	0.12318431831590812
334	Striatum ventral region	vermal III	0.034172574639747044
334	Striatum ventral region	vermal IV	0.013398598319304606
334	Striatum ventral region	vermal V	-0.03169114357543637
334	Striatum ventral region	vermal VI	0.03816017729215902
334	Striatum ventral region	vermal VIIAf	0.00918921560754296
334	Striatum ventral region	vermal VIIAt	-0.011020658278167382
334	Striatum ventral region	vermal VIIB	0.032967763410090875
334	Striatum ventral region	vermal VIIIA	0.006572932658699042
334	Striatum ventral region	vermal VIIIB	0.06287983524892939
334	Striatum ventral region	vermal IX	0.006607752021827907
334	Striatum ventral region	vermal X	0.14070987159795145
334	Striatum ventral region	III	0.013158920102164755
334	Striatum ventral region	IV	-0.0036017881037150035
334	Striatum ventral region	V	-0.032894597927772454
334	Striatum ventral region	VI	-0.030606668949227162
334	Striatum ventral region	crus I	-0.025799154496913126
334	Striatum ventral region	crus II	-0.031122640411670306
334	Striatum ventral region	VIIB	-0.024362496661154448
334	Striatum ventral region	VIIIA	-0.03402436753542086
334	Striatum ventral region	VIIIB	0.007893094578812078
334	Striatum ventral region	IX	-0.017251264486493594
334	Striatum ventral region	X	0.024765389992744937
334	Striatum ventral region	cerebellar nuclei	0.2061456524544478
334	Lateral septal complex	claustrum	0.3554665726748261
334	Lateral septal complex	dentate gyrus	0.5462939605295707
334	Lateral septal complex	CA1 field	0.5516957139237642
334	Lateral septal complex	CA2 field	0.5780187088877471
334	Lateral septal complex	CA3 field	0.5893103540736859
334	Lateral septal complex	CA4 field	0.645927024165099
334	Lateral septal complex	subiculum	0.5619452021576176
334	Lateral septal complex	cingulate gyrus	0.1833983108495184
334	Lateral septal complex	parahippocampal gyrus	0.39785781121013314
334	Lateral septal complex	piriform cortex	0.7006585630178322
334	Lateral septal complex	anterior orbital gyrus	0.1661885728905616
334	Lateral septal complex	frontal operculum	0.15487055372073533
334	Lateral septal complex	frontal pole	0.035892236437317926
334	Lateral septal complex	gyrus rectus	0.24433416631724844
334	Lateral septal complex	inferior frontal gyrus	0.015625285370905267
334	Lateral septal complex	inferior rostral gyrus	0.252968044564955
334	Lateral septal complex	lateral orbital gyrus	0.06544691578181276
334	Lateral septal complex	medial orbital gyrus	0.21492656363838347
334	Lateral septal complex	middle frontal gyrus	0.016128306444829783
334	Lateral septal complex	paracentral lobule, anterior part	-0.12486281140509314
334	Lateral septal complex	paraterminal gyrus	0.7430107153534371
334	Lateral septal complex	parolfactory gyri	0.4943072045468105
334	Lateral septal complex	posterior orbital gyrus	0.159047443148822
334	Lateral septal complex	precentral gyrus	-0.16358170711948117
334	Lateral septal complex	superior frontal gyrus	0.06912994505808934
334	Lateral septal complex	superior rostral gyrus	0.24235069934216966
334	Lateral septal complex	insula	0.25398742085530607
334	Lateral septal complex	cuneus	-0.2007140826940544
334	Lateral septal complex	inferior occipital gyrus	-0.1604488746017669
334	Lateral septal complex	lingual gyrus	-0.21684100847873317
334	Lateral septal complex	occipital pole	-0.18793745940383974
334	Lateral septal complex	occipito-temporal gyrus	-0.07578846085674852
334	Lateral septal complex	superior occipital gyrus	-0.14337925554862035
334	Lateral septal complex	inferior parietal lobule	-0.03746186847041627
334	Lateral septal complex	paracentral lobule, posterior part	-0.07854321624395985
334	Lateral septal complex	postcentral gyrus	-0.1782324586956464
334	Lateral septal complex	precuneus	-0.0835605506331055
334	Lateral septal complex	superior parietal lobule	-0.14221790359990205
334	Lateral septal complex	fusiform gyrus	0.26340826696445097
334	Lateral septal complex	Heschl's gyrus	-0.10419182130007758
334	Lateral septal complex	inferior temporal gyrus	0.16601176168110143
334	Lateral septal complex	middle temporal gyrus	0.07364729715828117
334	Lateral septal complex	planum polare	0.2238192128123693
334	Lateral septal complex	planum temporale	-0.06910539886445259
334	Lateral septal complex	superior temporal gyrus	0.06359034277684338
334	Lateral septal complex	temporal pole	0.36217611518046733
334	Lateral septal complex	transverse gyri	-0.12192362761701596
334	Lateral septal complex	amygdala	0.8674018240140776
334	Lateral septal complex	globus pallidus	0.4029803464778954
334	Lateral septal complex	caudate nucleus	0.6825772544728421
334	Lateral septal complex	nucleus accumbens	0.8249490866487819
334	Lateral septal complex	putamen	0.6534417378066001
334	Lateral septal complex	septal nuclei	0.8882863561348544
334	Lateral septal complex	substantia innominata	0.8023986630048096
334	Lateral septal complex	epithalamus	0.5365323213991425
334	Lateral septal complex	hypothalamus	0.6767918444331352
334	Lateral septal complex	subthalamus	0.27067828344056893
334	Lateral septal complex	thalamus	0.3342028183134413
334	Lateral septal complex	inferior colliculus	0.42933679646329953
334	Lateral septal complex	superior colliculus	0.47668742639566
334	Lateral septal complex	midbrain tegmentum	0.42237226560944785
334	Lateral septal complex	pretectal region	0.49920574804743423
334	Lateral septal complex	pons	0.29349497326864066
334	Lateral septal complex	myelencephalon	0.3101814142311512
334	Lateral septal complex	vermal I-II	0.13535584978714338
334	Lateral septal complex	vermal III	0.01003609786299298
334	Lateral septal complex	vermal IV	-0.018552453249740114
334	Lateral septal complex	vermal V	-0.07438976432638175
334	Lateral septal complex	vermal VI	0.0020812115083920675
334	Lateral septal complex	vermal VIIAf	-0.03770853568317531
334	Lateral septal complex	vermal VIIAt	-0.07338747108962967
334	Lateral septal complex	vermal VIIB	-0.006665536494634292
334	Lateral septal complex	vermal VIIIA	-0.03965472219691701
334	Lateral septal complex	vermal VIIIB	0.044328573913271926
334	Lateral septal complex	vermal IX	-0.014266544171317312
334	Lateral septal complex	vermal X	0.21122646318324326
334	Lateral septal complex	III	-0.004160005132735588
334	Lateral septal complex	IV	-0.048325852143764704
334	Lateral septal complex	V	-0.07344084659774415
334	Lateral septal complex	VI	-0.06924931209745619
334	Lateral septal complex	crus I	-0.06823984038664403
334	Lateral septal complex	crus II	-0.08853113478664293
334	Lateral septal complex	VIIB	-0.07289921562990626
334	Lateral septal complex	VIIIA	-0.09802733691918089
334	Lateral septal complex	VIIIB	-0.046830337842612084
334	Lateral septal complex	IX	-0.09718942315237922
334	Lateral septal complex	X	0.010088446585909114
334	Lateral septal complex	cerebellar nuclei	0.2668399605708651
334	Caudoputamen	claustrum	0.5088121662914485
334	Caudoputamen	dentate gyrus	0.45957816273334584
334	Caudoputamen	CA1 field	0.19000270974774885
334	Caudoputamen	CA2 field	0.2398060245381778
334	Caudoputamen	CA3 field	0.24905089553233778
334	Caudoputamen	CA4 field	0.29277160478734965
334	Caudoputamen	subiculum	0.0860759516737276
334	Caudoputamen	cingulate gyrus	0.29241235208659455
334	Caudoputamen	parahippocampal gyrus	0.2797195597609585
334	Caudoputamen	piriform cortex	0.431960351115739
334	Caudoputamen	anterior orbital gyrus	0.2939232734367723
334	Caudoputamen	frontal operculum	0.34955671492204526
334	Caudoputamen	frontal pole	0.19355610659050773
334	Caudoputamen	gyrus rectus	0.30286439248316216
334	Caudoputamen	inferior frontal gyrus	0.2961975004046961
334	Caudoputamen	inferior rostral gyrus	0.2887042751085687
334	Caudoputamen	lateral orbital gyrus	0.2875403018376358
334	Caudoputamen	medial orbital gyrus	0.309830891929152
334	Caudoputamen	middle frontal gyrus	0.22868691219964452
334	Caudoputamen	paracentral lobule, anterior part	0.22432706994131738
334	Caudoputamen	paraterminal gyrus	0.4150617028427211
334	Caudoputamen	parolfactory gyri	0.3575102595697991
334	Caudoputamen	posterior orbital gyrus	0.35930049438415534
334	Caudoputamen	precentral gyrus	0.16851287156990566
334	Caudoputamen	superior frontal gyrus	0.2540623133215275
334	Caudoputamen	superior rostral gyrus	0.3154515103195879
334	Caudoputamen	insula	0.362238771826423
334	Caudoputamen	cuneus	0.2019124707525335
334	Caudoputamen	inferior occipital gyrus	0.2213811502979308
334	Caudoputamen	lingual gyrus	0.1969932525717132
334	Caudoputamen	occipital pole	0.22514406209116947
334	Caudoputamen	occipito-temporal gyrus	0.2734255157044649
334	Caudoputamen	superior occipital gyrus	0.22389448008049248
334	Caudoputamen	inferior parietal lobule	0.25961955135074466
334	Caudoputamen	paracentral lobule, posterior part	0.17690407717385864
334	Caudoputamen	postcentral gyrus	0.19643831027982156
334	Caudoputamen	precuneus	0.21539405513243634
334	Caudoputamen	superior parietal lobule	0.19081847749204067
334	Caudoputamen	fusiform gyrus	0.3638019001861709
334	Caudoputamen	Heschl's gyrus	0.26020295393241494
334	Caudoputamen	inferior temporal gyrus	0.32544183965058465
334	Caudoputamen	middle temporal gyrus	0.31256672214131387
334	Caudoputamen	planum polare	0.3951380989890631
334	Caudoputamen	planum temporale	0.1787986312786988
334	Caudoputamen	superior temporal gyrus	0.3120435793999469
334	Caudoputamen	temporal pole	0.331246855316676
334	Caudoputamen	transverse gyri	0.27322700548494766
334	Caudoputamen	amygdala	0.49054485741712345
334	Caudoputamen	globus pallidus	0.3899591062391711
334	Caudoputamen	caudate nucleus	0.9800213086202494
334	Caudoputamen	nucleus accumbens	0.9321406677469799
334	Caudoputamen	putamen	0.9719492729318544
334	Caudoputamen	septal nuclei	0.5936178749992539
334	Caudoputamen	substantia innominata	0.6033572605308447
334	Caudoputamen	epithalamus	0.374977230431052
334	Caudoputamen	hypothalamus	0.34672602160502836
334	Caudoputamen	subthalamus	0.19313718592592394
334	Caudoputamen	thalamus	0.299838350208492
334	Caudoputamen	inferior colliculus	0.3940540553502452
334	Caudoputamen	superior colliculus	0.31347661562573914
334	Caudoputamen	midbrain tegmentum	0.2537900419809648
334	Caudoputamen	pretectal region	0.34427345641511886
334	Caudoputamen	pons	0.13671186664802687
334	Caudoputamen	myelencephalon	0.1923813332670889
334	Caudoputamen	vermal I-II	0.11497838478491738
334	Caudoputamen	vermal III	-0.014084399572984583
334	Caudoputamen	vermal IV	-0.05370415300654056
334	Caudoputamen	vermal V	-0.0992077767123857
334	Caudoputamen	vermal VI	-0.03224210623941153
334	Caudoputamen	vermal VIIAf	-0.06763951415169572
334	Caudoputamen	vermal VIIAt	-0.08959034379249982
334	Caudoputamen	vermal VIIB	-0.011639158662520048
334	Caudoputamen	vermal VIIIA	-0.0608683320129405
334	Caudoputamen	vermal VIIIB	0.024584511553895228
334	Caudoputamen	vermal IX	-0.054427248541047676
334	Caudoputamen	vermal X	0.12325149133240486
334	Caudoputamen	III	-0.043878928115422766
334	Caudoputamen	IV	-0.07065572746435479
334	Caudoputamen	V	-0.11112346013030316
334	Caudoputamen	VI	-0.11437292048300693
334	Caudoputamen	crus I	-0.10612788811234523
334	Caudoputamen	crus II	-0.11633870222125502
334	Caudoputamen	VIIB	-0.10567865562089086
334	Caudoputamen	VIIIA	-0.12027853185709543
334	Caudoputamen	VIIIB	-0.0776714725956196
334	Caudoputamen	IX	-0.09110266416448505
334	Caudoputamen	X	-0.034326876813245914
334	Caudoputamen	cerebellar nuclei	0.22412410246058342
334	Medial amygdalar nucleus	claustrum	0.3909996780767306
334	Medial amygdalar nucleus	dentate gyrus	0.6518706718181734
334	Medial amygdalar nucleus	CA1 field	0.7134272753413352
334	Medial amygdalar nucleus	CA2 field	0.8122229017830882
334	Medial amygdalar nucleus	CA3 field	0.8279016897490808
334	Medial amygdalar nucleus	CA4 field	0.8577223632636461
334	Medial amygdalar nucleus	subiculum	0.7703526401979179
334	Medial amygdalar nucleus	cingulate gyrus	0.25069133804084576
334	Medial amygdalar nucleus	parahippocampal gyrus	0.5626237201227937
334	Medial amygdalar nucleus	piriform cortex	0.8030800261597012
334	Medial amygdalar nucleus	anterior orbital gyrus	0.22037129091363872
334	Medial amygdalar nucleus	frontal operculum	0.20384331735238512
334	Medial amygdalar nucleus	frontal pole	0.10786366624950396
334	Medial amygdalar nucleus	gyrus rectus	0.3346513524776253
334	Medial amygdalar nucleus	inferior frontal gyrus	0.023687409465366058
334	Medial amygdalar nucleus	inferior rostral gyrus	0.36765493688918605
334	Medial amygdalar nucleus	lateral orbital gyrus	0.09685410519157026
334	Medial amygdalar nucleus	medial orbital gyrus	0.298658272382218
334	Medial amygdalar nucleus	middle frontal gyrus	0.04881738624562888
334	Medial amygdalar nucleus	paracentral lobule, anterior part	-0.18667437650737365
334	Medial amygdalar nucleus	paraterminal gyrus	0.7876969495126691
334	Medial amygdalar nucleus	parolfactory gyri	0.6343744994526817
334	Medial amygdalar nucleus	posterior orbital gyrus	0.1906472740325446
334	Medial amygdalar nucleus	precentral gyrus	-0.2276710206215524
334	Medial amygdalar nucleus	superior frontal gyrus	0.11308188183123252
334	Medial amygdalar nucleus	superior rostral gyrus	0.325045004142624
334	Medial amygdalar nucleus	insula	0.33611537528166346
334	Medial amygdalar nucleus	cuneus	-0.25579965987215536
334	Medial amygdalar nucleus	inferior occipital gyrus	-0.20264941057840102
334	Medial amygdalar nucleus	lingual gyrus	-0.2616248641112009
334	Medial amygdalar nucleus	occipital pole	-0.23707353721175686
334	Medial amygdalar nucleus	occipito-temporal gyrus	-0.09877818240716772
334	Medial amygdalar nucleus	superior occipital gyrus	-0.18101703419340961
334	Medial amygdalar nucleus	inferior parietal lobule	-0.03527323120304134
334	Medial amygdalar nucleus	paracentral lobule, posterior part	-0.03984209744399708
334	Medial amygdalar nucleus	postcentral gyrus	-0.24812363275838265
334	Medial amygdalar nucleus	precuneus	-0.08843689843981929
334	Medial amygdalar nucleus	superior parietal lobule	-0.17061177160567406
334	Medial amygdalar nucleus	fusiform gyrus	0.35845142580413836
334	Medial amygdalar nucleus	Heschl's gyrus	-0.13530087176656125
334	Medial amygdalar nucleus	inferior temporal gyrus	0.23833193415440945
334	Medial amygdalar nucleus	middle temporal gyrus	0.10035120264764284
334	Medial amygdalar nucleus	planum polare	0.2668811714027626
334	Medial amygdalar nucleus	planum temporale	-0.0454133882715074
334	Medial amygdalar nucleus	superior temporal gyrus	0.08751896538645779
334	Medial amygdalar nucleus	temporal pole	0.5033989963814497
334	Medial amygdalar nucleus	transverse gyri	-0.16889546288425492
334	Medial amygdalar nucleus	amygdala	0.9075993151979137
334	Medial amygdalar nucleus	globus pallidus	0.2871336219455707
334	Medial amygdalar nucleus	caudate nucleus	0.3524166034252917
334	Medial amygdalar nucleus	nucleus accumbens	0.5475830786784491
334	Medial amygdalar nucleus	putamen	0.3130823020939115
334	Medial amygdalar nucleus	septal nuclei	0.7149299427706727
334	Medial amygdalar nucleus	substantia innominata	0.6681999019442176
334	Medial amygdalar nucleus	epithalamus	0.4499192621393776
334	Medial amygdalar nucleus	hypothalamus	0.6853397488736928
334	Medial amygdalar nucleus	subthalamus	0.22698391497209808
334	Medial amygdalar nucleus	thalamus	0.2484309691633016
334	Medial amygdalar nucleus	inferior colliculus	0.24210300220359193
334	Medial amygdalar nucleus	superior colliculus	0.3316177490641171
334	Medial amygdalar nucleus	midbrain tegmentum	0.3774267312624878
334	Medial amygdalar nucleus	pretectal region	0.37817439162334904
334	Medial amygdalar nucleus	pons	0.26859083045288673
334	Medial amygdalar nucleus	myelencephalon	0.2654453345927226
334	Medial amygdalar nucleus	vermal I-II	0.1591207878161329
334	Medial amygdalar nucleus	vermal III	0.1114591789585849
334	Medial amygdalar nucleus	vermal IV	0.10921006589522805
334	Medial amygdalar nucleus	vermal V	0.07646658633203593
334	Medial amygdalar nucleus	vermal VI	0.13480025883121022
334	Medial amygdalar nucleus	vermal VIIAf	0.10862128647621205
334	Medial amygdalar nucleus	vermal VIIAt	0.07339210205002629
334	Medial amygdalar nucleus	vermal VIIB	0.09276603376092445
334	Medial amygdalar nucleus	vermal VIIIA	0.09311570988318155
334	Medial amygdalar nucleus	vermal VIIIB	0.12729238332530068
334	Medial amygdalar nucleus	vermal IX	0.10380642452332693
334	Medial amygdalar nucleus	vermal X	0.2027398763208046
334	Medial amygdalar nucleus	III	0.10712446624231803
334	Medial amygdalar nucleus	IV	0.08786780809058635
334	Medial amygdalar nucleus	V	0.079198129235345
334	Medial amygdalar nucleus	VI	0.08963310066418265
334	Medial amygdalar nucleus	crus I	0.0779264207109077
334	Medial amygdalar nucleus	crus II	0.06737378779408508
334	Medial amygdalar nucleus	VIIB	0.07632264047529114
334	Medial amygdalar nucleus	VIIIA	0.06485596672622791
334	Medial amygdalar nucleus	VIIIB	0.10686609155816303
334	Medial amygdalar nucleus	IX	0.04863663419569278
334	Medial amygdalar nucleus	X	0.10686097070483869
334	Medial amygdalar nucleus	cerebellar nuclei	0.16787667812507545
334	Hypothalamus	claustrum	0.19381530874906916
334	Hypothalamus	dentate gyrus	0.4695492706988176
334	Hypothalamus	CA1 field	0.49631777303862595
334	Hypothalamus	CA2 field	0.6478566227654319
334	Hypothalamus	CA3 field	0.6963375991631386
334	Hypothalamus	CA4 field	0.7182017679919287
334	Hypothalamus	subiculum	0.568173162082741
334	Hypothalamus	cingulate gyrus	0.12934363349694938
334	Hypothalamus	parahippocampal gyrus	0.3005249653034234
334	Hypothalamus	piriform cortex	0.47998445273674395
334	Hypothalamus	anterior orbital gyrus	0.11355555654990855
334	Hypothalamus	frontal operculum	0.09412867779256887
334	Hypothalamus	frontal pole	0.022314712320270002
334	Hypothalamus	gyrus rectus	0.1577981026705926
334	Hypothalamus	inferior frontal gyrus	0.01066477552346289
334	Hypothalamus	inferior rostral gyrus	0.19702890349523997
334	Hypothalamus	lateral orbital gyrus	0.02817883465664416
334	Hypothalamus	medial orbital gyrus	0.1536602278348682
334	Hypothalamus	middle frontal gyrus	0.045479815027782894
334	Hypothalamus	paracentral lobule, anterior part	-0.06421273938363059
334	Hypothalamus	paraterminal gyrus	0.5621758362986394
334	Hypothalamus	parolfactory gyri	0.385608815218597
334	Hypothalamus	posterior orbital gyrus	0.0768977839841134
334	Hypothalamus	precentral gyrus	-0.0857361864256489
334	Hypothalamus	superior frontal gyrus	0.06984604404993043
334	Hypothalamus	superior rostral gyrus	0.18570593331358373
334	Hypothalamus	insula	0.1662375130786158
334	Hypothalamus	cuneus	-0.08680712839397632
334	Hypothalamus	inferior occipital gyrus	-0.07967770467577358
334	Hypothalamus	lingual gyrus	-0.10779167140676997
334	Hypothalamus	occipital pole	-0.09292087705292326
334	Hypothalamus	occipito-temporal gyrus	-0.04612714775552301
334	Hypothalamus	superior occipital gyrus	-0.05460179351568945
334	Hypothalamus	inferior parietal lobule	-0.002670688081822158
334	Hypothalamus	paracentral lobule, posterior part	0.05025435109100481
334	Hypothalamus	postcentral gyrus	-0.09094283770496113
334	Hypothalamus	precuneus	-0.03200920543465264
334	Hypothalamus	superior parietal lobule	-0.06123678800046796
334	Hypothalamus	fusiform gyrus	0.19673063103035074
334	Hypothalamus	Heschl's gyrus	-0.06681318192950335
334	Hypothalamus	inferior temporal gyrus	0.12399394164979607
334	Hypothalamus	middle temporal gyrus	0.04097220324689357
334	Hypothalamus	planum polare	0.13974514896526763
334	Hypothalamus	planum temporale	-0.021392203370422913
334	Hypothalamus	superior temporal gyrus	0.05562009400073098
334	Hypothalamus	temporal pole	0.25676371881552945
334	Hypothalamus	transverse gyri	-0.09592154107572802
334	Hypothalamus	amygdala	0.684381671628109
334	Hypothalamus	globus pallidus	0.5722162858435663
334	Hypothalamus	caudate nucleus	0.35092192286527396
334	Hypothalamus	nucleus accumbens	0.4990550029008527
334	Hypothalamus	putamen	0.3414016239356943
334	Hypothalamus	septal nuclei	0.8261414520332254
334	Hypothalamus	substantia innominata	0.8689425080751481
334	Hypothalamus	epithalamus	0.7404984067410699
334	Hypothalamus	hypothalamus	0.9424936332068597
334	Hypothalamus	subthalamus	0.5631261194952156
334	Hypothalamus	thalamus	0.533929293060045
334	Hypothalamus	inferior colliculus	0.5167050155250885
334	Hypothalamus	superior colliculus	0.6234388191348565
334	Hypothalamus	midbrain tegmentum	0.7174622829306228
334	Hypothalamus	pretectal region	0.6717199933629899
334	Hypothalamus	pons	0.6143049605358659
334	Hypothalamus	myelencephalon	0.5984514739935803
334	Hypothalamus	vermal I-II	0.32939421012373615
334	Hypothalamus	vermal III	0.1565637679240395
334	Hypothalamus	vermal IV	0.1326047950922966
334	Hypothalamus	vermal V	0.08017738635273039
334	Hypothalamus	vermal VI	0.17416289787991518
334	Hypothalamus	vermal VIIAf	0.10944789487814661
334	Hypothalamus	vermal VIIAt	0.040791255856701056
334	Hypothalamus	vermal VIIB	0.12372196941910776
334	Hypothalamus	vermal VIIIA	0.09008046796298592
334	Hypothalamus	vermal VIIIB	0.1902298953084125
334	Hypothalamus	vermal IX	0.13839021796273507
334	Hypothalamus	vermal X	0.3923154072327375
334	Hypothalamus	III	0.18414861933032473
334	Hypothalamus	IV	0.11898971749098736
334	Hypothalamus	V	0.0937876771609693
334	Hypothalamus	VI	0.09143529083855646
334	Hypothalamus	crus I	0.07086962384462246
334	Hypothalamus	crus II	0.04760913769004369
334	Hypothalamus	VIIB	0.07057938555228702
334	Hypothalamus	VIIIA	0.026929450352770685
334	Hypothalamus	VIIIB	0.11521016571232146
334	Hypothalamus	IX	0.02618933573028604
334	Hypothalamus	X	0.16939112448765314
334	Hypothalamus	cerebellar nuclei	0.472080142898554
334	Thalamus	claustrum	0.11011164007610902
334	Thalamus	dentate gyrus	0.38250266557449936
334	Thalamus	CA1 field	0.21338065106423498
334	Thalamus	CA2 field	0.3842048961878301
334	Thalamus	CA3 field	0.46474824299669615
334	Thalamus	CA4 field	0.4788789608220576
334	Thalamus	subiculum	0.26997969999704374
334	Thalamus	cingulate gyrus	0.11123856170307833
334	Thalamus	parahippocampal gyrus	0.11861641570943565
334	Thalamus	piriform cortex	0.21529463998367707
334	Thalamus	anterior orbital gyrus	0.1286877765643898
334	Thalamus	frontal operculum	0.09543696193229347
334	Thalamus	frontal pole	0.08244634924301732
334	Thalamus	gyrus rectus	0.11920429528802191
334	Thalamus	inferior frontal gyrus	0.09385902938574951
334	Thalamus	inferior rostral gyrus	0.1497515980863673
334	Thalamus	lateral orbital gyrus	0.08021109925007244
334	Thalamus	medial orbital gyrus	0.13817034192970587
334	Thalamus	middle frontal gyrus	0.11801339365617622
334	Thalamus	paracentral lobule, anterior part	0.05691848307083671
334	Thalamus	paraterminal gyrus	0.2744330169587404
334	Thalamus	parolfactory gyri	0.2268235532816186
334	Thalamus	posterior orbital gyrus	0.09399465068991535
334	Thalamus	precentral gyrus	0.03580385739219795
334	Thalamus	superior frontal gyrus	0.11393863548458291
334	Thalamus	superior rostral gyrus	0.17781476364391224
334	Thalamus	insula	0.12736254211812623
334	Thalamus	cuneus	0.10722192966754725
334	Thalamus	inferior occipital gyrus	0.08689178598364607
334	Thalamus	lingual gyrus	0.08125469805379955
334	Thalamus	occipital pole	0.09037768387723633
334	Thalamus	occipito-temporal gyrus	0.08100252917707494
334	Thalamus	superior occipital gyrus	0.1093741297073933
334	Thalamus	inferior parietal lobule	0.1021240363950299
334	Thalamus	paracentral lobule, posterior part	0.1661103404420249
334	Thalamus	postcentral gyrus	0.06617571944266216
334	Thalamus	precuneus	0.09015482685125885
334	Thalamus	superior parietal lobule	0.08545208494552427
334	Thalamus	fusiform gyrus	0.15135613188724975
334	Thalamus	Heschl's gyrus	0.07930547310719038
334	Thalamus	inferior temporal gyrus	0.11972710492954883
334	Thalamus	middle temporal gyrus	0.08769917878086657
334	Thalamus	planum polare	0.1310375952169238
334	Thalamus	planum temporale	0.08573550876709464
334	Thalamus	superior temporal gyrus	0.11622787388284236
334	Thalamus	temporal pole	0.1350444336129098
334	Thalamus	transverse gyri	0.05919633883325925
334	Thalamus	amygdala	0.3433038170156587
334	Thalamus	globus pallidus	0.5234782552536879
334	Thalamus	caudate nucleus	0.31712940169181886
334	Thalamus	nucleus accumbens	0.36858444734737117
334	Thalamus	putamen	0.3227402792620029
334	Thalamus	septal nuclei	0.5275259925133857
334	Thalamus	substantia innominata	0.6262728467716921
334	Thalamus	epithalamus	0.5765512793506901
334	Thalamus	hypothalamus	0.6637545916541537
334	Thalamus	subthalamus	0.5582294720865384
334	Thalamus	thalamus	0.7949342888219343
334	Thalamus	inferior colliculus	0.6153446819787267
334	Thalamus	superior colliculus	0.6640473687777857
334	Thalamus	midbrain tegmentum	0.5689747722868564
334	Thalamus	pretectal region	0.5932219175601982
334	Thalamus	pons	0.4965364616468381
334	Thalamus	myelencephalon	0.46458801584327397
334	Thalamus	vermal I-II	0.36070888436749
334	Thalamus	vermal III	0.20966485616837505
334	Thalamus	vermal IV	0.18941165480353173
334	Thalamus	vermal V	0.16129055580184898
334	Thalamus	vermal VI	0.19709582072284676
334	Thalamus	vermal VIIAf	0.1570260440830328
334	Thalamus	vermal VIIAt	0.11319258022048377
334	Thalamus	vermal VIIB	0.17230662778526623
334	Thalamus	vermal VIIIA	0.15302490371618824
334	Thalamus	vermal VIIIB	0.23467737448810344
334	Thalamus	vermal IX	0.1818708547108883
334	Thalamus	vermal X	0.3777534477335469
334	Thalamus	III	0.29449469473400997
334	Thalamus	IV	0.19044951137562405
334	Thalamus	V	0.16247795356584008
334	Thalamus	VI	0.15115044632151933
334	Thalamus	crus I	0.11619763870479406
334	Thalamus	crus II	0.09081444293457569
334	Thalamus	VIIB	0.12001958128238525
334	Thalamus	VIIIA	0.07515362836367692
334	Thalamus	VIIIB	0.14091940432261957
334	Thalamus	IX	0.06662840799119622
334	Thalamus	X	0.2087669607691555
334	Thalamus	cerebellar nuclei	0.4685506847648177
334	Inferior colliculus	claustrum	-0.1462873138464056
334	Inferior colliculus	dentate gyrus	-0.09362569513321745
334	Inferior colliculus	CA1 field	-0.14807042923024963
334	Inferior colliculus	CA2 field	-0.1204765523210976
334	Inferior colliculus	CA3 field	-0.0808408319346122
334	Inferior colliculus	CA4 field	-0.04976911865576037
334	Inferior colliculus	subiculum	-0.06424762281356944
334	Inferior colliculus	cingulate gyrus	-0.0029186243639176958
334	Inferior colliculus	parahippocampal gyrus	-0.13674793923643583
334	Inferior colliculus	piriform cortex	-0.09110725737831568
334	Inferior colliculus	anterior orbital gyrus	0.015984298205997314
334	Inferior colliculus	frontal operculum	-0.0031175128711273814
334	Inferior colliculus	frontal pole	0.026853252416730134
334	Inferior colliculus	gyrus rectus	-0.05067254199076063
334	Inferior colliculus	inferior frontal gyrus	0.09852177291194429
334	Inferior colliculus	inferior rostral gyrus	-0.031409125461423236
334	Inferior colliculus	lateral orbital gyrus	0.056643856488460646
334	Inferior colliculus	medial orbital gyrus	-0.008159968094362115
334	Inferior colliculus	middle frontal gyrus	0.10530570138044407
334	Inferior colliculus	paracentral lobule, anterior part	0.17885164038865764
334	Inferior colliculus	paraterminal gyrus	-0.02609315370737746
334	Inferior colliculus	parolfactory gyri	-0.1098370771776383
334	Inferior colliculus	posterior orbital gyrus	-0.01681693037489463
334	Inferior colliculus	precentral gyrus	0.18973844402878018
334	Inferior colliculus	superior frontal gyrus	0.054408542949441696
334	Inferior colliculus	superior rostral gyrus	-0.0012531161679829902
334	Inferior colliculus	insula	-0.04133987935840229
334	Inferior colliculus	cuneus	0.2877641008616257
334	Inferior colliculus	inferior occipital gyrus	0.2120185911665437
334	Inferior colliculus	lingual gyrus	0.2597925813872526
334	Inferior colliculus	occipital pole	0.24452063901990914
334	Inferior colliculus	occipito-temporal gyrus	0.1496824971804739
334	Inferior colliculus	superior occipital gyrus	0.23245642435902092
334	Inferior colliculus	inferior parietal lobule	0.13876372611418814
334	Inferior colliculus	paracentral lobule, posterior part	0.21751059745762508
334	Inferior colliculus	postcentral gyrus	0.22997652155189832
334	Inferior colliculus	precuneus	0.15420946767316024
334	Inferior colliculus	superior parietal lobule	0.1953867898170422
334	Inferior colliculus	fusiform gyrus	-0.040213399023996246
334	Inferior colliculus	Heschl's gyrus	0.18173880080141672
334	Inferior colliculus	inferior temporal gyrus	0.006058790119062537
334	Inferior colliculus	middle temporal gyrus	0.045429393752052905
334	Inferior colliculus	planum polare	-0.0061201627879827756
334	Inferior colliculus	planum temporale	0.16152778744286875
334	Inferior colliculus	superior temporal gyrus	0.0790931397976044
334	Inferior colliculus	temporal pole	-0.13000256689262216
334	Inferior colliculus	transverse gyri	0.16463897791183388
334	Inferior colliculus	amygdala	-8.946661259878654e-4
334	Inferior colliculus	globus pallidus	0.4820720358555907
334	Inferior colliculus	caudate nucleus	0.16234408246034226
334	Inferior colliculus	nucleus accumbens	0.14018287260073276
334	Inferior colliculus	putamen	0.18486467181523059
334	Inferior colliculus	septal nuclei	0.25969392802562014
334	Inferior colliculus	substantia innominata	0.3283288128738061
334	Inferior colliculus	epithalamus	0.39477626523988446
334	Inferior colliculus	hypothalamus	0.3380969271491986
334	Inferior colliculus	subthalamus	0.6211427333352362
334	Inferior colliculus	thalamus	0.7532872597954061
334	Inferior colliculus	inferior colliculus	0.7741856819700939
334	Inferior colliculus	superior colliculus	0.7456525096584075
334	Inferior colliculus	midbrain tegmentum	0.5098664151025943
334	Inferior colliculus	pretectal region	0.5974764125929245
334	Inferior colliculus	pons	0.5580760139160371
334	Inferior colliculus	myelencephalon	0.5033768643468111
334	Inferior colliculus	vermal I-II	0.35361149817581583
334	Inferior colliculus	vermal III	0.1825682575773051
334	Inferior colliculus	vermal IV	0.1298403319868864
334	Inferior colliculus	vermal V	0.10757920322171714
334	Inferior colliculus	vermal VI	0.09753981688760632
334	Inferior colliculus	vermal VIIAf	0.06614704433964515
334	Inferior colliculus	vermal VIIAt	0.03962486383230238
334	Inferior colliculus	vermal VIIB	0.1350880706677781
334	Inferior colliculus	vermal VIIIA	0.08772520461881878
334	Inferior colliculus	vermal VIIIB	0.20786650465722786
334	Inferior colliculus	vermal IX	0.14674871462571812
334	Inferior colliculus	vermal X	0.4045859605265408
334	Inferior colliculus	III	0.25694709191682674
334	Inferior colliculus	IV	0.1284206040353813
334	Inferior colliculus	V	0.10260130509665201
334	Inferior colliculus	VI	0.07624275953914122
334	Inferior colliculus	crus I	0.0608783574699344
334	Inferior colliculus	crus II	0.021747423575635787
334	Inferior colliculus	VIIB	0.06177583301292602
334	Inferior colliculus	VIIIA	-0.0013403860480160354
334	Inferior colliculus	VIIIB	0.0333313631596789
334	Inferior colliculus	IX	-0.006714416998646307
334	Inferior colliculus	X	0.2167165401694472
334	Inferior colliculus	cerebellar nuclei	0.6049182695816178
334	Superior colliculus, sensory related	claustrum	-0.1123877562235372
334	Superior colliculus, sensory related	dentate gyrus	0.08935153043907784
334	Superior colliculus, sensory related	CA1 field	0.12590591451260463
[truncated: 980,669 more rows]
