# Supplementary material for: Whole-brain comparison of rodent and human brains using spatial transcriptomics
Source: eLife. 2022 Nov 7;11:e79418. doi: 10.7554/eLife.79418 (PMC9708081; doi:10.7554/eLife.79418)
Supplement: Figure 3—source data 1. [file elife-79418-fig3-data1.csv]

Data	MouseRegion	Target	TargetRank	Similarity
HomologousGenes	Primary motor area	superior temporal gyrus	1	1
HomologousGenes	Primary motor area	precuneus	2	0.9935236258124147
HomologousGenes	Primary motor area	occipito-temporal gyrus	3	0.9923303604733227
HomologousGenes	Primary motor area	inferior parietal lobule	4	0.9864690734900673
HomologousGenes	Primary motor area	middle temporal gyrus	5	0.9834679969402518
HomologousGenes	Primary motor area	superior frontal gyrus	6	0.9789590951960763
HomologousGenes	Primary motor area	superior occipital gyrus	7	0.9770297154168106
HomologousGenes	Primary motor area	middle frontal gyrus	8	0.9768972814990927
HomologousGenes	Primary motor area	Heschl's gyrus	9	0.9728806549420932
HomologousGenes	Primary motor area	superior parietal lobule	10	0.9712072892211087
HomologousGenes	Primary motor area	lateral orbital gyrus	11	0.9699718332612094
HomologousGenes	Primary motor area	inferior temporal gyrus	12	0.9698407204949091
HomologousGenes	Primary motor area	inferior frontal gyrus	13	0.96413135299992625
HomologousGenes	Primary motor area	inferior occipital gyrus	14	0.9631080107711097
HomologousGenes	Primary motor area	frontal operculum	15	0.9575908713053568
HomologousGenes	Primary motor area	transverse gyri	16	0.9545456632500993
HomologousGenes	Primary motor area	planum temporale	17	0.95340838042124
HomologousGenes	Primary motor area	posterior orbital gyrus	18	0.9509835506663189
HomologousGenes	Primary motor area	paracentral lobule, posterior part	19	0.9488236818783894
HomologousGenes	Primary motor area	medial orbital gyrus	20	0.9389569218262794
HomologousGenes	Primary motor area	precentral gyrus	21	0.9366276731337154
HomologousGenes	Primary motor area	anterior orbital gyrus	22	0.9365528903738488
HomologousGenes	Primary motor area	paracentral lobule, anterior part	23	0.9361080325261153
HomologousGenes	Primary motor area	cingulate gyrus	24	0.9336353783629299
HomologousGenes	Primary motor area	insula	25	0.929034227808962
HomologousGenes	Primary motor area	postcentral gyrus	26	0.9270563237058335
HomologousGenes	Primary motor area	planum polare	27	0.9239101688020759
HomologousGenes	Primary motor area	superior rostral gyrus	28	0.9201636971260545
HomologousGenes	Primary motor area	fusiform gyrus	29	0.9172791154049429
HomologousGenes	Primary motor area	gyrus rectus	30	0.9079904265978685
HomologousGenes	Primary motor area	frontal pole	31	0.9009598197213092
HomologousGenes	Primary motor area	inferior rostral gyrus	32	0.8900356071263895
HomologousGenes	Primary motor area	cuneus	33	0.8677547593176993
HomologousGenes	Primary motor area	lingual gyrus	34	0.8626749206644233
HomologousGenes	Primary motor area	occipital pole	35	0.846693421261429
HomologousGenes	Primary motor area	temporal pole	36	0.807082983331174
HomologousGenes	Primary motor area	parahippocampal gyrus	37	0.7856325591583737
HomologousGenes	Primary motor area	parolfactory gyri	38	0.7738067070209658
HomologousGenes	Primary motor area	subiculum	39	0.6935318174511854
HomologousGenes	Primary motor area	CA1 field	40	0.6230608740399082
HomologousGenes	Primary motor area	CA2 field	41	0.6106084712733064
HomologousGenes	Primary motor area	dentate gyrus	42	0.6080527695148986
HomologousGenes	Primary motor area	claustrum	43	0.6057934887099815
HomologousGenes	Primary motor area	CA3 field	44	0.5668661662979472
HomologousGenes	Primary motor area	piriform cortex	45	0.48364706104280014
HomologousGenes	Primary motor area	paraterminal gyrus	46	0.4690463863365654
HomologousGenes	Primary motor area	CA4 field	47	0.4658405817363421
HomologousGenes	Primary motor area	amygdala	48	0.3591554850831973
HomologousGenes	Primary motor area	VIIIA	49	0.34355250126282716
HomologousGenes	Primary motor area	vermal VIIAt	50	0.3424375555410004
HomologousGenes	Primary motor area	crus II	51	0.34118305693888173
HomologousGenes	Primary motor area	VI	52	0.33330967158611047
HomologousGenes	Primary motor area	V	53	0.3318538610339369
HomologousGenes	Primary motor area	VIIB	54	0.3317560182778628
HomologousGenes	Primary motor area	crus I	55	0.33088225853900227
HomologousGenes	Primary motor area	vermal VIIIA	56	0.32969183310233247
HomologousGenes	Primary motor area	vermal V	57	0.3292626463633876
HomologousGenes	Primary motor area	IX	58	0.324991239102274
HomologousGenes	Primary motor area	vermal IX	59	0.32488602249267706
HomologousGenes	Primary motor area	VIIIB	60	0.32306860873382715
HomologousGenes	Primary motor area	vermal VIIAf	61	0.32274298183507466
HomologousGenes	Primary motor area	IV	62	0.3151797344227767
HomologousGenes	Primary motor area	caudate nucleus	63	0.31517587166987243
HomologousGenes	Primary motor area	vermal IV	64	0.31372106807592187
HomologousGenes	Primary motor area	III	65	0.31302062941809716
HomologousGenes	Primary motor area	vermal VIIB	66	0.3104058160244538
HomologousGenes	Primary motor area	vermal VI	67	0.3032204527752985
HomologousGenes	Primary motor area	vermal III	68	0.29785141500775264
HomologousGenes	Primary motor area	vermal VIIIB	69	0.29041864561927055
HomologousGenes	Primary motor area	X	70	0.2873882463734063
HomologousGenes	Primary motor area	nucleus accumbens	71	0.2856685457088285
HomologousGenes	Primary motor area	putamen	72	0.28320792227697056
HomologousGenes	Primary motor area	vermal I-II	73	0.25720309821563864
HomologousGenes	Primary motor area	vermal X	74	0.2527388447269962
HomologousGenes	Primary motor area	inferior colliculus	75	0.10329409838482023
HomologousGenes	Primary motor area	septal nuclei	76	0.10266262494294263
HomologousGenes	Primary motor area	globus pallidus	77	0.09612167176983949
HomologousGenes	Primary motor area	subthalamus	78	0.0941949059747244
HomologousGenes	Primary motor area	cerebellar nuclei	79	0.07544804401626116
HomologousGenes	Primary motor area	substantia innominata	80	0.07080718017657266
HomologousGenes	Primary motor area	thalamus	81	0.0628602377918088
HomologousGenes	Primary motor area	hypothalamus	82	0.054437234843129026
HomologousGenes	Primary motor area	epithalamus	83	0.0487246248623185
HomologousGenes	Primary motor area	pons	84	0.02652504205677416
HomologousGenes	Primary motor area	pretectal region	85	0.020698826166881987
HomologousGenes	Primary motor area	myelencephalon	86	0.016971356910221662
HomologousGenes	Primary motor area	superior colliculus	87	0.014108676069434977
HomologousGenes	Primary motor area	midbrain tegmentum	88	0
LatentSpace_v1	Primary motor area	paracentral lobule, anterior part	1	1
LatentSpace_v1	Primary motor area	precentral gyrus	2	0.9854935859152691
LatentSpace_v1	Primary motor area	occipito-temporal gyrus	3	0.9846785397302724
LatentSpace_v1	Primary motor area	inferior occipital gyrus	4	0.9808932483772083
LatentSpace_v1	Primary motor area	Heschl's gyrus	5	0.9802276770367062
LatentSpace_v1	Primary motor area	superior parietal lobule	6	0.9798521296666322
LatentSpace_v1	Primary motor area	precuneus	7	0.9789958630262358
LatentSpace_v1	Primary motor area	inferior parietal lobule	8	0.9778954751661658
LatentSpace_v1	Primary motor area	superior occipital gyrus	9	0.9755616321007191
LatentSpace_v1	Primary motor area	transverse gyri	10	0.9755101143060075
LatentSpace_v1	Primary motor area	inferior frontal gyrus	11	0.9684139427410108
LatentSpace_v1	Primary motor area	postcentral gyrus	12	0.9675703378458794
LatentSpace_v1	Primary motor area	paracentral lobule, posterior part	13	0.9658868965775709
LatentSpace_v1	Primary motor area	planum temporale	14	0.9604372651592675
LatentSpace_v1	Primary motor area	superior temporal gyrus	15	0.9586611220365129
LatentSpace_v1	Primary motor area	middle frontal gyrus	16	0.9586239845317006
LatentSpace_v1	Primary motor area	middle temporal gyrus	17	0.9454971656113174
LatentSpace_v1	Primary motor area	superior frontal gyrus	18	0.9438304876655732
LatentSpace_v1	Primary motor area	occipital pole	19	0.9410171771059604
LatentSpace_v1	Primary motor area	lateral orbital gyrus	20	0.9358259105483245
LatentSpace_v1	Primary motor area	frontal pole	21	0.918608487816471
LatentSpace_v1	Primary motor area	posterior orbital gyrus	22	0.9089618113904665
LatentSpace_v1	Primary motor area	anterior orbital gyrus	23	0.9068046144462198
LatentSpace_v1	Primary motor area	frontal operculum	24	0.9067535896466895
LatentSpace_v1	Primary motor area	cuneus	25	0.9059896938728307
LatentSpace_v1	Primary motor area	lingual gyrus	26	0.9041456558268876
LatentSpace_v1	Primary motor area	cingulate gyrus	27	0.8971265764084958
LatentSpace_v1	Primary motor area	inferior temporal gyrus	28	0.8952456586940005
LatentSpace_v1	Primary motor area	planum polare	29	0.888189373762036
LatentSpace_v1	Primary motor area	superior rostral gyrus	30	0.867898221098319
LatentSpace_v1	Primary motor area	medial orbital gyrus	31	0.8568082117083741
LatentSpace_v1	Primary motor area	insula	32	0.8412180936380471
LatentSpace_v1	Primary motor area	fusiform gyrus	33	0.8366498833071044
LatentSpace_v1	Primary motor area	gyrus rectus	34	0.8319905417154786
LatentSpace_v1	Primary motor area	inferior rostral gyrus	35	0.8128145949461629
LatentSpace_v1	Primary motor area	claustrum	36	0.7378650545131349
LatentSpace_v1	Primary motor area	temporal pole	37	0.6979631142180551
LatentSpace_v1	Primary motor area	parahippocampal gyrus	38	0.6534045847922068
LatentSpace_v1	Primary motor area	parolfactory gyri	39	0.626884242850184
LatentSpace_v1	Primary motor area	dentate gyrus	40	0.49971678426610844
LatentSpace_v1	Primary motor area	caudate nucleus	41	0.43630996771977154
LatentSpace_v1	Primary motor area	putamen	42	0.4196442382023732
LatentSpace_v1	Primary motor area	paraterminal gyrus	43	0.4099591687843425
LatentSpace_v1	Primary motor area	CA1 field	44	0.40354361757474816
LatentSpace_v1	Primary motor area	inferior colliculus	45	0.35285465607087235
LatentSpace_v1	Primary motor area	cerebellar nuclei	46	0.3416520241039156
LatentSpace_v1	Primary motor area	nucleus accumbens	47	0.31906279245589586
LatentSpace_v1	Primary motor area	subiculum	48	0.3153984746070729
LatentSpace_v1	Primary motor area	subthalamus	49	0.2814163024399802
LatentSpace_v1	Primary motor area	globus pallidus	50	0.2801880504251196
LatentSpace_v1	Primary motor area	myelencephalon	51	0.27071858273530996
LatentSpace_v1	Primary motor area	pons	52	0.269750216648031
LatentSpace_v1	Primary motor area	superior colliculus	53	0.2651280228938867
LatentSpace_v1	Primary motor area	CA2 field	54	0.23251798352911532
LatentSpace_v1	Primary motor area	pretectal region	55	0.22247965999341096
LatentSpace_v1	Primary motor area	CA3 field	56	0.19214230123799053
LatentSpace_v1	Primary motor area	vermal I-II	57	0.18788328099391277
LatentSpace_v1	Primary motor area	midbrain tegmentum	58	0.17028848473684866
LatentSpace_v1	Primary motor area	X	59	0.16525402381286564
LatentSpace_v1	Primary motor area	III	60	0.1642089878678459
LatentSpace_v1	Primary motor area	vermal V	61	0.158223762085556
LatentSpace_v1	Primary motor area	piriform cortex	62	0.1574512483621239
LatentSpace_v1	Primary motor area	vermal III	63	0.15465435842944483
LatentSpace_v1	Primary motor area	thalamus	64	0.15321461264769623
LatentSpace_v1	Primary motor area	vermal VIIB	65	0.14948431953149524
LatentSpace_v1	Primary motor area	vermal VIIIB	66	0.14553295836031724
LatentSpace_v1	Primary motor area	IX	67	0.14305422672198959
LatentSpace_v1	Primary motor area	vermal VIIAf	68	0.14254279397653055
LatentSpace_v1	Primary motor area	VIIB	69	0.14152728603783257
LatentSpace_v1	Primary motor area	IV	70	0.14070580175181338
LatentSpace_v1	Primary motor area	V	71	0.13970765769735835
LatentSpace_v1	Primary motor area	vermal IV	72	0.1377559889775927
LatentSpace_v1	Primary motor area	vermal IX	73	0.13760118635308632
LatentSpace_v1	Primary motor area	vermal X	74	0.13746308762104203
LatentSpace_v1	Primary motor area	crus II	75	0.13671353197176095
LatentSpace_v1	Primary motor area	vermal VIIIA	76	0.13364983555162493
LatentSpace_v1	Primary motor area	crus I	77	0.1291625535503292
LatentSpace_v1	Primary motor area	vermal VI	78	0.1274653477467817
LatentSpace_v1	Primary motor area	VI	79	0.1266815782576199
LatentSpace_v1	Primary motor area	VIIIA	80	0.12331585265921897
LatentSpace_v1	Primary motor area	vermal VIIAt	81	0.12115768820932152
LatentSpace_v1	Primary motor area	VIIIB	82	0.11856529278818098
LatentSpace_v1	Primary motor area	epithalamus	83	0.07963023826830133
LatentSpace_v1	Primary motor area	amygdala	84	0.06736154549458191
LatentSpace_v1	Primary motor area	CA4 field	85	0.05603677543943216
LatentSpace_v1	Primary motor area	substantia innominata	86	0.0462391998086908
LatentSpace_v1	Primary motor area	septal nuclei	87	0.008847052387409191
LatentSpace_v1	Primary motor area	hypothalamus	88	0
LatentSpace_v2	Primary motor area	occipito-temporal gyrus	1	1
LatentSpace_v2	Primary motor area	transverse gyri	2	0.9960089492506804
LatentSpace_v2	Primary motor area	paracentral lobule, anterior part	3	0.9955053316498322
LatentSpace_v2	Primary motor area	precuneus	4	0.9921132087349933
LatentSpace_v2	Primary motor area	Heschl's gyrus	5	0.9889655239358897
LatentSpace_v2	Primary motor area	inferior parietal lobule	6	0.9879181885723112
LatentSpace_v2	Primary motor area	inferior frontal gyrus	7	0.9856115946733689
LatentSpace_v2	Primary motor area	precentral gyrus	8	0.9825254483166385
LatentSpace_v2	Primary motor area	superior parietal lobule	9	0.9823314834867637
LatentSpace_v2	Primary motor area	inferior occipital gyrus	10	0.981117985083878
LatentSpace_v2	Primary motor area	middle frontal gyrus	11	0.9795813790068796
LatentSpace_v2	Primary motor area	superior occipital gyrus	12	0.976313300563024
LatentSpace_v2	Primary motor area	planum temporale	13	0.9701182711174169
LatentSpace_v2	Primary motor area	superior frontal gyrus	14	0.9693194709349748
LatentSpace_v2	Primary motor area	postcentral gyrus	15	0.9680952602164702
LatentSpace_v2	Primary motor area	superior temporal gyrus	16	0.9680271315183308
LatentSpace_v2	Primary motor area	lateral orbital gyrus	17	0.9621306416782979
LatentSpace_v2	Primary motor area	middle temporal gyrus	18	0.961835313046255
LatentSpace_v2	Primary motor area	frontal pole	19	0.9581288320215369
LatentSpace_v2	Primary motor area	occipital pole	20	0.9489928958120656
LatentSpace_v2	Primary motor area	paracentral lobule, posterior part	21	0.9426749952319633
LatentSpace_v2	Primary motor area	lingual gyrus	22	0.9280076647427955
LatentSpace_v2	Primary motor area	anterior orbital gyrus	23	0.9274453632045209
LatentSpace_v2	Primary motor area	cuneus	24	0.9223285779932385
LatentSpace_v2	Primary motor area	posterior orbital gyrus	25	0.9222647916302406
LatentSpace_v2	Primary motor area	frontal operculum	26	0.9193499366027018
LatentSpace_v2	Primary motor area	cingulate gyrus	27	0.9139840473097613
LatentSpace_v2	Primary motor area	inferior temporal gyrus	28	0.9024209640696605
LatentSpace_v2	Primary motor area	planum polare	29	0.8846715800486423
LatentSpace_v2	Primary motor area	superior rostral gyrus	30	0.8838854106361237
LatentSpace_v2	Primary motor area	medial orbital gyrus	31	0.8808535348546416
LatentSpace_v2	Primary motor area	gyrus rectus	32	0.8486016384144792
LatentSpace_v2	Primary motor area	insula	33	0.8335611171438779
LatentSpace_v2	Primary motor area	inferior rostral gyrus	34	0.8258922460466435
LatentSpace_v2	Primary motor area	fusiform gyrus	35	0.8233309915876533
LatentSpace_v2	Primary motor area	claustrum	36	0.6908671737462624
LatentSpace_v2	Primary motor area	temporal pole	37	0.6705934771656369
LatentSpace_v2	Primary motor area	parolfactory gyri	38	0.5947137932548263
LatentSpace_v2	Primary motor area	parahippocampal gyrus	39	0.5879202513388279
LatentSpace_v2	Primary motor area	dentate gyrus	40	0.5045770830188027
LatentSpace_v2	Primary motor area	paraterminal gyrus	41	0.4158231728115421
LatentSpace_v2	Primary motor area	CA1 field	42	0.3681616426941751
LatentSpace_v2	Primary motor area	CA2 field	43	0.2345889088837882
LatentSpace_v2	Primary motor area	CA3 field	44	0.22634993055014113
LatentSpace_v2	Primary motor area	subiculum	45	0.21942508318277887
LatentSpace_v2	Primary motor area	myelencephalon	46	0.21390399902172647
LatentSpace_v2	Primary motor area	pons	47	0.20692450416232475
LatentSpace_v2	Primary motor area	caudate nucleus	48	0.2035567557173171
LatentSpace_v2	Primary motor area	midbrain tegmentum	49	0.20299125040189056
LatentSpace_v2	Primary motor area	putamen	50	0.20194777761420407
LatentSpace_v2	Primary motor area	cerebellar nuclei	51	0.20089382643276518
LatentSpace_v2	Primary motor area	subthalamus	52	0.2002665341140801
LatentSpace_v2	Primary motor area	globus pallidus	53	0.18568058706019222
LatentSpace_v2	Primary motor area	pretectal region	54	0.18512049924962706
LatentSpace_v2	Primary motor area	vermal VIIB	55	0.18089850229752813
LatentSpace_v2	Primary motor area	inferior colliculus	56	0.17716591666363582
LatentSpace_v2	Primary motor area	V	57	0.17425126102291194
LatentSpace_v2	Primary motor area	vermal I-II	58	0.17420052294679214
LatentSpace_v2	Primary motor area	vermal III	59	0.1715587164859547
LatentSpace_v2	Primary motor area	IX	60	0.16942648644307046
LatentSpace_v2	Primary motor area	III	61	0.16861478234420788
LatentSpace_v2	Primary motor area	VI	62	0.16841680802653783
LatentSpace_v2	Primary motor area	crus I	63	0.16813989928857173
LatentSpace_v2	Primary motor area	superior colliculus	64	0.16731660146280983
LatentSpace_v2	Primary motor area	IV	65	0.16699363040382922
LatentSpace_v2	Primary motor area	vermal V	66	0.16681453156239506
LatentSpace_v2	Primary motor area	crus II	67	0.16657604371029539
LatentSpace_v2	Primary motor area	VIIB	68	0.16389562378669464
LatentSpace_v2	Primary motor area	vermal IV	69	0.16328921186166892
LatentSpace_v2	Primary motor area	vermal VIIAf	70	0.1630178959337628
LatentSpace_v2	Primary motor area	vermal VIIIB	71	0.1618509869217767
LatentSpace_v2	Primary motor area	VIIIA	72	0.16158086551649886
LatentSpace_v2	Primary motor area	vermal VIIAt	73	0.15793120180957104
LatentSpace_v2	Primary motor area	vermal VIIIA	74	0.15691723457712758
LatentSpace_v2	Primary motor area	X	75	0.15388336039612302
LatentSpace_v2	Primary motor area	vermal IX	76	0.14868689016965805
LatentSpace_v2	Primary motor area	epithalamus	77	0.1435970903675383
LatentSpace_v2	Primary motor area	vermal VI	78	0.14272657931031824
LatentSpace_v2	Primary motor area	VIIIB	79	0.14159381669983082
LatentSpace_v2	Primary motor area	vermal X	80	0.1382889941936557
LatentSpace_v2	Primary motor area	thalamus	81	0.1359486498257979
LatentSpace_v2	Primary motor area	piriform cortex	82	0.10498516827589002
LatentSpace_v2	Primary motor area	nucleus accumbens	83	0.10077481277393309
LatentSpace_v2	Primary motor area	hypothalamus	84	0.09663241474627958
LatentSpace_v2	Primary motor area	CA4 field	85	0.03463163192817527
LatentSpace_v2	Primary motor area	septal nuclei	86	0.028847262454901573
LatentSpace_v2	Primary motor area	substantia innominata	87	0.01538597569266944
LatentSpace_v2	Primary motor area	amygdala	88	0
LatentSpace_v3	Primary motor area	paracentral lobule, anterior part	1	1
LatentSpace_v3	Primary motor area	precentral gyrus	2	0.9873640736102578
LatentSpace_v3	Primary motor area	occipito-temporal gyrus	3	0.9608220389442457
LatentSpace_v3	Primary motor area	superior parietal lobule	4	0.9588943431569621
LatentSpace_v3	Primary motor area	precuneus	5	0.9587680150862452
LatentSpace_v3	Primary motor area	transverse gyri	6	0.9520096682892862
LatentSpace_v3	Primary motor area	inferior parietal lobule	7	0.949120852912354
LatentSpace_v3	Primary motor area	Heschl's gyrus	8	0.9475521650125965
LatentSpace_v3	Primary motor area	postcentral gyrus	9	0.9457247364186162
LatentSpace_v3	Primary motor area	inferior occipital gyrus	10	0.9444191959211878
LatentSpace_v3	Primary motor area	inferior frontal gyrus	11	0.9431159058336367
LatentSpace_v3	Primary motor area	middle frontal gyrus	12	0.9405293616978999
LatentSpace_v3	Primary motor area	paracentral lobule, posterior part	13	0.9379504103898061
LatentSpace_v3	Primary motor area	superior occipital gyrus	14	0.9370065304563604
LatentSpace_v3	Primary motor area	planum temporale	15	0.9345530400289045
LatentSpace_v3	Primary motor area	superior temporal gyrus	16	0.929799480764547
LatentSpace_v3	Primary motor area	superior frontal gyrus	17	0.9266259043164593
LatentSpace_v3	Primary motor area	frontal pole	18	0.9190647944652618
LatentSpace_v3	Primary motor area	middle temporal gyrus	19	0.914294259675391
LatentSpace_v3	Primary motor area	lateral orbital gyrus	20	0.8937817241694759
LatentSpace_v3	Primary motor area	posterior orbital gyrus	21	0.8864326790443205
LatentSpace_v3	Primary motor area	occipital pole	22	0.8791057228493342
LatentSpace_v3	Primary motor area	anterior orbital gyrus	23	0.8741617628504021
LatentSpace_v3	Primary motor area	frontal operculum	24	0.8668735050175509
LatentSpace_v3	Primary motor area	lingual gyrus	25	0.861843109531354
LatentSpace_v3	Primary motor area	cuneus	26	0.8597092402762173
LatentSpace_v3	Primary motor area	cingulate gyrus	27	0.8525339330938714
LatentSpace_v3	Primary motor area	inferior temporal gyrus	28	0.850042551097697
LatentSpace_v3	Primary motor area	planum polare	29	0.8363475214635401
LatentSpace_v3	Primary motor area	superior rostral gyrus	30	0.8161258996357099
LatentSpace_v3	Primary motor area	medial orbital gyrus	31	0.8111888422520763
LatentSpace_v3	Primary motor area	insula	32	0.7874842684601537
LatentSpace_v3	Primary motor area	gyrus rectus	33	0.7806168433302978
LatentSpace_v3	Primary motor area	fusiform gyrus	34	0.7804128297503368
LatentSpace_v3	Primary motor area	inferior rostral gyrus	35	0.7598916610132506
LatentSpace_v3	Primary motor area	claustrum	36	0.7269876759332997
LatentSpace_v3	Primary motor area	temporal pole	37	0.6355320654681751
LatentSpace_v3	Primary motor area	parahippocampal gyrus	38	0.5717385736267153
LatentSpace_v3	Primary motor area	parolfactory gyri	39	0.5598453691830308
LatentSpace_v3	Primary motor area	dentate gyrus	40	0.5257161178516521
LatentSpace_v3	Primary motor area	CA1 field	41	0.3858593096449926
LatentSpace_v3	Primary motor area	paraterminal gyrus	42	0.35428457781419725
LatentSpace_v3	Primary motor area	CA3 field	43	0.3305538019017029
LatentSpace_v3	Primary motor area	subiculum	44	0.31604030285708906
LatentSpace_v3	Primary motor area	CA2 field	45	0.31415942842479067
LatentSpace_v3	Primary motor area	IX	46	0.25364374206905393
LatentSpace_v3	Primary motor area	vermal V	47	0.24905142723983875
LatentSpace_v3	Primary motor area	VIIIA	48	0.24745270843109415
LatentSpace_v3	Primary motor area	crus II	49	0.24295969648855573
LatentSpace_v3	Primary motor area	V	50	0.24024174154340563
LatentSpace_v3	Primary motor area	VI	51	0.23700123881427151
LatentSpace_v3	Primary motor area	vermal VIIAt	52	0.23550468302511662
LatentSpace_v3	Primary motor area	vermal VIIAf	53	0.23476260427822526
LatentSpace_v3	Primary motor area	VIIB	54	0.23448576556792392
LatentSpace_v3	Primary motor area	crus I	55	0.23099373904167728
LatentSpace_v3	Primary motor area	caudate nucleus	56	0.2285528510466918
LatentSpace_v3	Primary motor area	IV	57	0.227873476380102
LatentSpace_v3	Primary motor area	vermal VIIIA	58	0.2249671456313455
LatentSpace_v3	Primary motor area	putamen	59	0.22423467390825985
LatentSpace_v3	Primary motor area	vermal IV	60	0.22221014543569237
LatentSpace_v3	Primary motor area	vermal VIIB	61	0.22207646103814596
LatentSpace_v3	Primary motor area	VIIIB	62	0.2213356303066087
LatentSpace_v3	Primary motor area	III	63	0.22090842643875663
LatentSpace_v3	Primary motor area	vermal III	64	0.21696417832965725
LatentSpace_v3	Primary motor area	vermal IX	65	0.20811485447002046
LatentSpace_v3	Primary motor area	vermal VI	66	0.20006837100192457
LatentSpace_v3	Primary motor area	X	67	0.19587791603885257
LatentSpace_v3	Primary motor area	vermal VIIIB	68	0.1917386966096757
LatentSpace_v3	Primary motor area	vermal I-II	69	0.18867377082028858
LatentSpace_v3	Primary motor area	CA4 field	70	0.18275779847839804
LatentSpace_v3	Primary motor area	nucleus accumbens	71	0.1610067533819995
LatentSpace_v3	Primary motor area	thalamus	72	0.16071849706949862
LatentSpace_v3	Primary motor area	globus pallidus	73	0.15840167562406154
LatentSpace_v3	Primary motor area	inferior colliculus	74	0.14891149517096322
LatentSpace_v3	Primary motor area	cerebellar nuclei	75	0.14809050310195182
LatentSpace_v3	Primary motor area	piriform cortex	76	0.1404926383205991
LatentSpace_v3	Primary motor area	subthalamus	77	0.1347534319870179
LatentSpace_v3	Primary motor area	vermal X	78	0.12969267195839623
LatentSpace_v3	Primary motor area	superior colliculus	79	0.1294206208617852
LatentSpace_v3	Primary motor area	pons	80	0.1198110740853352
LatentSpace_v3	Primary motor area	myelencephalon	81	0.10362631546012349
LatentSpace_v3	Primary motor area	pretectal region	82	0.09780364973590101
LatentSpace_v3	Primary motor area	midbrain tegmentum	83	0.07100107225324098
LatentSpace_v3	Primary motor area	epithalamus	84	0.054472552976092145
LatentSpace_v3	Primary motor area	amygdala	85	0.033957407532806856
LatentSpace_v3	Primary motor area	substantia innominata	86	0.010940257621416531
LatentSpace_v3	Primary motor area	hypothalamus	87	0.0028301461670469236
LatentSpace_v3	Primary motor area	septal nuclei	88	0
LatentSpace_v4	Primary motor area	middle frontal gyrus	1	1
LatentSpace_v4	Primary motor area	paracentral lobule, anterior part	2	0.999138831958635
LatentSpace_v4	Primary motor area	inferior frontal gyrus	3	0.996374478169814
LatentSpace_v4	Primary motor area	precuneus	4	0.9906607163314135
LatentSpace_v4	Primary motor area	inferior parietal lobule	5	0.9901871718520682
LatentSpace_v4	Primary motor area	superior frontal gyrus	6	0.9892323208141428
LatentSpace_v4	Primary motor area	occipito-temporal gyrus	7	0.987972284913998
LatentSpace_v4	Primary motor area	superior temporal gyrus	8	0.9840412563385775
LatentSpace_v4	Primary motor area	precentral gyrus	9	0.9836969039260477
LatentSpace_v4	Primary motor area	superior parietal lobule	10	0.9804231727566762
LatentSpace_v4	Primary motor area	paracentral lobule, posterior part	11	0.9794223002472474
LatentSpace_v4	Primary motor area	Heschl's gyrus	12	0.9742325007653874
LatentSpace_v4	Primary motor area	transverse gyri	13	0.9726916218473531
LatentSpace_v4	Primary motor area	planum temporale	14	0.9726554795614071
LatentSpace_v4	Primary motor area	middle temporal gyrus	15	0.9682590685881474
LatentSpace_v4	Primary motor area	inferior occipital gyrus	16	0.9658515677379987
LatentSpace_v4	Primary motor area	superior occipital gyrus	17	0.9585490522309584
LatentSpace_v4	Primary motor area	postcentral gyrus	18	0.9564998416528377
LatentSpace_v4	Primary motor area	lateral orbital gyrus	19	0.954100378800764
LatentSpace_v4	Primary motor area	frontal pole	20	0.9518110072149508
LatentSpace_v4	Primary motor area	posterior orbital gyrus	21	0.9396180904697865
LatentSpace_v4	Primary motor area	frontal operculum	22	0.9371022902990946
LatentSpace_v4	Primary motor area	anterior orbital gyrus	23	0.9286304290581237
LatentSpace_v4	Primary motor area	occipital pole	24	0.925307811522689
LatentSpace_v4	Primary motor area	cingulate gyrus	25	0.911363665557488
LatentSpace_v4	Primary motor area	inferior temporal gyrus	26	0.9092353450055155
LatentSpace_v4	Primary motor area	planum polare	27	0.9037335942144067
LatentSpace_v4	Primary motor area	superior rostral gyrus	28	0.8939823642616557
LatentSpace_v4	Primary motor area	cuneus	29	0.8926482246358479
LatentSpace_v4	Primary motor area	lingual gyrus	30	0.8898160394434229
LatentSpace_v4	Primary motor area	medial orbital gyrus	31	0.8856143872467652
LatentSpace_v4	Primary motor area	insula	32	0.8544507099883252
LatentSpace_v4	Primary motor area	gyrus rectus	33	0.8442984407615453
LatentSpace_v4	Primary motor area	fusiform gyrus	34	0.8413463505630385
LatentSpace_v4	Primary motor area	inferior rostral gyrus	35	0.8407758402520646
LatentSpace_v4	Primary motor area	claustrum	36	0.6931894574894153
LatentSpace_v4	Primary motor area	temporal pole	37	0.6711101195208878
LatentSpace_v4	Primary motor area	parolfactory gyri	38	0.6089982272204411
LatentSpace_v4	Primary motor area	parahippocampal gyrus	39	0.5595069094072651
LatentSpace_v4	Primary motor area	dentate gyrus	40	0.5490180265772483
LatentSpace_v4	Primary motor area	CA1 field	41	0.37181564547414575
LatentSpace_v4	Primary motor area	paraterminal gyrus	42	0.3504673721378088
LatentSpace_v4	Primary motor area	CA2 field	43	0.29518305891784347
LatentSpace_v4	Primary motor area	CA3 field	44	0.29320296866144385
LatentSpace_v4	Primary motor area	subiculum	45	0.253490451711938
LatentSpace_v4	Primary motor area	caudate nucleus	46	0.25025400624114863
LatentSpace_v4	Primary motor area	VIIIA	47	0.2495328421322653
LatentSpace_v4	Primary motor area	crus II	48	0.24537732123809475
LatentSpace_v4	Primary motor area	IX	49	0.24179469511817092
LatentSpace_v4	Primary motor area	crus I	50	0.2362719772651196
LatentSpace_v4	Primary motor area	vermal VIIAt	51	0.234658294845349
LatentSpace_v4	Primary motor area	putamen	52	0.23374317451197563
LatentSpace_v4	Primary motor area	VI	53	0.23328071983139517
LatentSpace_v4	Primary motor area	vermal V	54	0.23244622448561217
LatentSpace_v4	Primary motor area	V	55	0.22952833388356755
LatentSpace_v4	Primary motor area	vermal VIIIA	56	0.2294114802947671
LatentSpace_v4	Primary motor area	VIIB	57	0.22865796331364974
LatentSpace_v4	Primary motor area	vermal IX	58	0.2284525408130421
LatentSpace_v4	Primary motor area	vermal VIIAf	59	0.22610170181469566
LatentSpace_v4	Primary motor area	vermal VIIB	60	0.21559090620110682
LatentSpace_v4	Primary motor area	vermal IV	61	0.21376960863599603
LatentSpace_v4	Primary motor area	VIIIB	62	0.2071853395290618
LatentSpace_v4	Primary motor area	IV	63	0.19959165786890307
LatentSpace_v4	Primary motor area	vermal VI	64	0.19227715894705222
LatentSpace_v4	Primary motor area	vermal III	65	0.1914168503872631
LatentSpace_v4	Primary motor area	vermal VIIIB	66	0.19022827701097253
LatentSpace_v4	Primary motor area	X	67	0.18983491314969458
LatentSpace_v4	Primary motor area	nucleus accumbens	68	0.1869242416194908
LatentSpace_v4	Primary motor area	III	69	0.16539387198807384
LatentSpace_v4	Primary motor area	vermal X	70	0.14517546393287598
LatentSpace_v4	Primary motor area	vermal I-II	71	0.12681850915012757
LatentSpace_v4	Primary motor area	myelencephalon	72	0.09798123287174933
LatentSpace_v4	Primary motor area	pons	73	0.08716994866639677
LatentSpace_v4	Primary motor area	piriform cortex	74	0.08683385154368108
LatentSpace_v4	Primary motor area	cerebellar nuclei	75	0.0852442179231866
LatentSpace_v4	Primary motor area	CA4 field	76	0.08109678037007914
LatentSpace_v4	Primary motor area	thalamus	77	0.07376664474831432
LatentSpace_v4	Primary motor area	subthalamus	78	0.06324020309773058
LatentSpace_v4	Primary motor area	midbrain tegmentum	79	0.04330473088481283
LatentSpace_v4	Primary motor area	amygdala	80	0.041905349474457294
LatentSpace_v4	Primary motor area	epithalamus	81	0.035916787622715184
LatentSpace_v4	Primary motor area	inferior colliculus	82	0.03420271136328751
LatentSpace_v4	Primary motor area	substantia innominata	83	0.022528046562195814
LatentSpace_v4	Primary motor area	hypothalamus	84	0.0162098527531062
LatentSpace_v4	Primary motor area	globus pallidus	85	0.015981264978853164
LatentSpace_v4	Primary motor area	pretectal region	86	0.010311990760035758
LatentSpace_v4	Primary motor area	superior colliculus	87	0.0021116078528896774
LatentSpace_v4	Primary motor area	septal nuclei	88	0
LatentSpace_v5	Primary motor area	paracentral lobule, anterior part	1	1
LatentSpace_v5	Primary motor area	precentral gyrus	2	0.9866001277524634
LatentSpace_v5	Primary motor area	precuneus	3	0.9538648102063516
LatentSpace_v5	Primary motor area	inferior parietal lobule	4	0.9529198941741576
LatentSpace_v5	Primary motor area	occipito-temporal gyrus	5	0.9511983086335324
LatentSpace_v5	Primary motor area	superior parietal lobule	6	0.9511074679234399
LatentSpace_v5	Primary motor area	middle frontal gyrus	7	0.9482430281563163
LatentSpace_v5	Primary motor area	inferior frontal gyrus	8	0.9447301155687908
LatentSpace_v5	Primary motor area	transverse gyri	9	0.9431656726408884
LatentSpace_v5	Primary motor area	paracentral lobule, posterior part	10	0.9430696264161689
LatentSpace_v5	Primary motor area	superior frontal gyrus	11	0.9325873106437444
LatentSpace_v5	Primary motor area	postcentral gyrus	12	0.9304891996040758
LatentSpace_v5	Primary motor area	Heschl's gyrus	13	0.9268342855575208
LatentSpace_v5	Primary motor area	superior temporal gyrus	14	0.9261641982277978
LatentSpace_v5	Primary motor area	inferior occipital gyrus	15	0.9201182634629441
LatentSpace_v5	Primary motor area	superior occipital gyrus	16	0.9144646892853485
LatentSpace_v5	Primary motor area	middle temporal gyrus	17	0.9072300085618216
LatentSpace_v5	Primary motor area	planum temporale	18	0.9005937400786651
LatentSpace_v5	Primary motor area	lateral orbital gyrus	19	0.8873697368689956
LatentSpace_v5	Primary motor area	frontal pole	20	0.8750426672131739
LatentSpace_v5	Primary motor area	anterior orbital gyrus	21	0.8714813068989684
LatentSpace_v5	Primary motor area	frontal operculum	22	0.8680357695742282
LatentSpace_v5	Primary motor area	posterior orbital gyrus	23	0.8620706334814159
LatentSpace_v5	Primary motor area	cingulate gyrus	24	0.8517385635903862
LatentSpace_v5	Primary motor area	inferior temporal gyrus	25	0.8470331131840523
LatentSpace_v5	Primary motor area	planum polare	26	0.8449079207361735
LatentSpace_v5	Primary motor area	occipital pole	27	0.8387802814179415
LatentSpace_v5	Primary motor area	superior rostral gyrus	28	0.8291493849842989
LatentSpace_v5	Primary motor area	medial orbital gyrus	29	0.8175765469373556
LatentSpace_v5	Primary motor area	cuneus	30	0.8145846244597188
LatentSpace_v5	Primary motor area	lingual gyrus	31	0.8121115015959662
LatentSpace_v5	Primary motor area	insula	32	0.7925112030016827
LatentSpace_v5	Primary motor area	gyrus rectus	33	0.785268775697845
LatentSpace_v5	Primary motor area	fusiform gyrus	34	0.7829202302080035
LatentSpace_v5	Primary motor area	inferior rostral gyrus	35	0.7707757332779137
LatentSpace_v5	Primary motor area	claustrum	36	0.7139880820458674
LatentSpace_v5	Primary motor area	temporal pole	37	0.6381699968509749
LatentSpace_v5	Primary motor area	parolfactory gyri	38	0.6004439757586234
LatentSpace_v5	Primary motor area	parahippocampal gyrus	39	0.5402888311703453
LatentSpace_v5	Primary motor area	dentate gyrus	40	0.44515799655020266
LatentSpace_v5	Primary motor area	CA3 field	41	0.43226870552120394
LatentSpace_v5	Primary motor area	CA2 field	42	0.42446092029686644
LatentSpace_v5	Primary motor area	IX	43	0.4156039711949491
LatentSpace_v5	Primary motor area	VIIIA	44	0.41397866709951586
LatentSpace_v5	Primary motor area	vermal VIIAt	45	0.41367643768073387
LatentSpace_v5	Primary motor area	crus II	46	0.409498983196142
LatentSpace_v5	Primary motor area	CA1 field	47	0.40785796848833594
LatentSpace_v5	Primary motor area	crus I	48	0.3954161602464364
LatentSpace_v5	Primary motor area	vermal V	49	0.3920573010171628
LatentSpace_v5	Primary motor area	VIIB	50	0.3892776887032938
LatentSpace_v5	Primary motor area	vermal VIIAf	51	0.3876932512424681
LatentSpace_v5	Primary motor area	vermal VIIIA	52	0.38354702371969346
LatentSpace_v5	Primary motor area	VI	53	0.3811535796125285
LatentSpace_v5	Primary motor area	V	54	0.37978458565420814
LatentSpace_v5	Primary motor area	vermal VIIB	55	0.37634489876017874
LatentSpace_v5	Primary motor area	vermal IV	56	0.3650714537493579
LatentSpace_v5	Primary motor area	vermal IX	57	0.3637661353048922
LatentSpace_v5	Primary motor area	IV	58	0.36367754544211134
LatentSpace_v5	Primary motor area	VIIIB	59	0.36118489844283846
LatentSpace_v5	Primary motor area	vermal III	60	0.3563473690819198
LatentSpace_v5	Primary motor area	vermal VI	61	0.34774021948532524
LatentSpace_v5	Primary motor area	X	62	0.3476399704254956
LatentSpace_v5	Primary motor area	vermal VIIIB	63	0.3380576889075408
LatentSpace_v5	Primary motor area	III	64	0.312665795091741
LatentSpace_v5	Primary motor area	subiculum	65	0.3088974612126264
LatentSpace_v5	Primary motor area	paraterminal gyrus	66	0.28596571050358577
LatentSpace_v5	Primary motor area	vermal I-II	67	0.2654864569656258
LatentSpace_v5	Primary motor area	vermal X	68	0.2586089327199621
LatentSpace_v5	Primary motor area	CA4 field	69	0.19130421506482126
LatentSpace_v5	Primary motor area	thalamus	70	0.15597857546969085
LatentSpace_v5	Primary motor area	cerebellar nuclei	71	0.15555010295323116
LatentSpace_v5	Primary motor area	myelencephalon	72	0.1443715569715632
LatentSpace_v5	Primary motor area	putamen	73	0.13188621617759166
LatentSpace_v5	Primary motor area	caudate nucleus	74	0.12863088232302178
LatentSpace_v5	Primary motor area	subthalamus	75	0.1259716812163174
LatentSpace_v5	Primary motor area	pons	76	0.11612139376212743
LatentSpace_v5	Primary motor area	globus pallidus	77	0.11275233344172443
LatentSpace_v5	Primary motor area	epithalamus	78	0.10156276727411012
LatentSpace_v5	Primary motor area	piriform cortex	79	0.10045440483168443
LatentSpace_v5	Primary motor area	midbrain tegmentum	80	0.0988224452717559
LatentSpace_v5	Primary motor area	inferior colliculus	81	0.09467804324278487
LatentSpace_v5	Primary motor area	pretectal region	82	0.07981972617537489
LatentSpace_v5	Primary motor area	superior colliculus	83	0.07773985788150635
LatentSpace_v5	Primary motor area	nucleus accumbens	84	0.04961320312460559
LatentSpace_v5	Primary motor area	hypothalamus	85	0.04365543072937646
LatentSpace_v5	Primary motor area	substantia innominata	86	0.04184617566321751
LatentSpace_v5	Primary motor area	septal nuclei	87	0.004743932478922167
LatentSpace_v5	Primary motor area	amygdala	88	0
LatentSpace_v6	Primary motor area	paracentral lobule, anterior part	1	1
LatentSpace_v6	Primary motor area	precentral gyrus	2	0.9827787365774453
LatentSpace_v6	Primary motor area	precuneus	3	0.9754988564026809
LatentSpace_v6	Primary motor area	superior parietal lobule	4	0.9744632735643667
LatentSpace_v6	Primary motor area	inferior parietal lobule	5	0.9677295286533313
LatentSpace_v6	Primary motor area	occipito-temporal gyrus	6	0.9664821186959209
LatentSpace_v6	Primary motor area	transverse gyri	7	0.9582460945621886
LatentSpace_v6	Primary motor area	paracentral lobule, posterior part	8	0.9551856277567777
LatentSpace_v6	Primary motor area	inferior occipital gyrus	9	0.9546501497300087
LatentSpace_v6	Primary motor area	superior occipital gyrus	10	0.951613190928323
LatentSpace_v6	Primary motor area	middle frontal gyrus	11	0.9510669134870265
LatentSpace_v6	Primary motor area	Heschl's gyrus	12	0.9510296578918708
LatentSpace_v6	Primary motor area	inferior frontal gyrus	13	0.9483781081440089
LatentSpace_v6	Primary motor area	postcentral gyrus	14	0.9480444927133724
LatentSpace_v6	Primary motor area	planum temporale	15	0.9371889453610874
LatentSpace_v6	Primary motor area	superior frontal gyrus	16	0.9258674557729809
LatentSpace_v6	Primary motor area	superior temporal gyrus	17	0.9246310638385489
LatentSpace_v6	Primary motor area	occipital pole	18	0.915537258358456
LatentSpace_v6	Primary motor area	middle temporal gyrus	19	0.9016417260302023
LatentSpace_v6	Primary motor area	lateral orbital gyrus	20	0.8989054510775732
LatentSpace_v6	Primary motor area	frontal pole	21	0.8902396938267414
LatentSpace_v6	Primary motor area	anterior orbital gyrus	22	0.8794362480599042
LatentSpace_v6	Primary motor area	lingual gyrus	23	0.8672432377184836
LatentSpace_v6	Primary motor area	posterior orbital gyrus	24	0.8652668418789641
LatentSpace_v6	Primary motor area	cuneus	25	0.8650213176740975
LatentSpace_v6	Primary motor area	frontal operculum	26	0.848312159700857
LatentSpace_v6	Primary motor area	cingulate gyrus	27	0.8378637199993387
LatentSpace_v6	Primary motor area	inferior temporal gyrus	28	0.8214082632673563
LatentSpace_v6	Primary motor area	superior rostral gyrus	29	0.816662856224574
LatentSpace_v6	Primary motor area	planum polare	30	0.8111894593031671
LatentSpace_v6	Primary motor area	medial orbital gyrus	31	0.8007810725811991
LatentSpace_v6	Primary motor area	gyrus rectus	32	0.7620670414474634
LatentSpace_v6	Primary motor area	insula	33	0.7500959158596165
LatentSpace_v6	Primary motor area	inferior rostral gyrus	34	0.7393648306028633
LatentSpace_v6	Primary motor area	fusiform gyrus	35	0.7295255447756724
LatentSpace_v6	Primary motor area	claustrum	36	0.6265709767169518
LatentSpace_v6	Primary motor area	temporal pole	37	0.5884115331493822
LatentSpace_v6	Primary motor area	parolfactory gyri	38	0.5390776981820629
LatentSpace_v6	Primary motor area	parahippocampal gyrus	39	0.5103243140140645
LatentSpace_v6	Primary motor area	dentate gyrus	40	0.42058704286844995
LatentSpace_v6	Primary motor area	IX	41	0.39839990110611495
LatentSpace_v6	Primary motor area	crus II	42	0.3894583013825708
LatentSpace_v6	Primary motor area	VIIIA	43	0.3885543486449719
LatentSpace_v6	Primary motor area	paraterminal gyrus	44	0.3850639308228176
LatentSpace_v6	Primary motor area	vermal VIIAt	45	0.3776330811132717
LatentSpace_v6	Primary motor area	CA1 field	46	0.37648405972036525
LatentSpace_v6	Primary motor area	vermal V	47	0.3728150437160122
LatentSpace_v6	Primary motor area	VIIB	48	0.37192244959163095
LatentSpace_v6	Primary motor area	crus I	49	0.36931244550506387
LatentSpace_v6	Primary motor area	V	50	0.36914575457657695
LatentSpace_v6	Primary motor area	VI	51	0.36467121532409735
LatentSpace_v6	Primary motor area	vermal VIIAf	52	0.35641413175224695
LatentSpace_v6	Primary motor area	vermal VIIB	53	0.35573583249146457
LatentSpace_v6	Primary motor area	IV	54	0.3544084764305608
LatentSpace_v6	Primary motor area	VIIIB	55	0.3512105546422455
LatentSpace_v6	Primary motor area	vermal VIIIA	56	0.34860226046540443
LatentSpace_v6	Primary motor area	vermal IV	57	0.34139704097341694
LatentSpace_v6	Primary motor area	vermal IX	58	0.3319437171817833
LatentSpace_v6	Primary motor area	III	59	0.3279183133015406
LatentSpace_v6	Primary motor area	vermal III	60	0.32667906566130894
LatentSpace_v6	Primary motor area	vermal VI	61	0.3148913147841415
LatentSpace_v6	Primary motor area	vermal VIIIB	62	0.30112422828641394
LatentSpace_v6	Primary motor area	CA2 field	63	0.3000224291336518
LatentSpace_v6	Primary motor area	CA3 field	64	0.2994432952196449
LatentSpace_v6	Primary motor area	subiculum	65	0.29832654852697443
LatentSpace_v6	Primary motor area	X	66	0.28630901518197205
LatentSpace_v6	Primary motor area	vermal I-II	67	0.2719405992980712
LatentSpace_v6	Primary motor area	cerebellar nuclei	68	0.2571208436569662
LatentSpace_v6	Primary motor area	subthalamus	69	0.2517241784993216
LatentSpace_v6	Primary motor area	pons	70	0.25169574314213067
LatentSpace_v6	Primary motor area	globus pallidus	71	0.2482325669566738
LatentSpace_v6	Primary motor area	thalamus	72	0.24436885374520181
LatentSpace_v6	Primary motor area	myelencephalon	73	0.24303082858852793
LatentSpace_v6	Primary motor area	midbrain tegmentum	74	0.2010257096105539
LatentSpace_v6	Primary motor area	putamen	75	0.19740536388835747
LatentSpace_v6	Primary motor area	caudate nucleus	76	0.1966449301819144
LatentSpace_v6	Primary motor area	vermal X	77	0.19138755257585371
LatentSpace_v6	Primary motor area	pretectal region	78	0.179835884505479
LatentSpace_v6	Primary motor area	inferior colliculus	79	0.17300705621757292
LatentSpace_v6	Primary motor area	epithalamus	80	0.16756866400164414
LatentSpace_v6	Primary motor area	superior colliculus	81	0.16745816597488947
LatentSpace_v6	Primary motor area	CA4 field	82	0.1547579775182505
LatentSpace_v6	Primary motor area	hypothalamus	83	0.09850537207833003
LatentSpace_v6	Primary motor area	nucleus accumbens	84	0.0945969630012265
LatentSpace_v6	Primary motor area	piriform cortex	85	0.08066976060168067
LatentSpace_v6	Primary motor area	substantia innominata	86	0.07062999829082038
LatentSpace_v6	Primary motor area	septal nuclei	87	0.03802985852763746
LatentSpace_v6	Primary motor area	amygdala	88	0
LatentSpace_v7	Primary motor area	paracentral lobule, anterior part	1	1
LatentSpace_v7	Primary motor area	occipito-temporal gyrus	2	0.9943545101489376
LatentSpace_v7	Primary motor area	precentral gyrus	3	0.9905666455962024
LatentSpace_v7	Primary motor area	inferior parietal lobule	4	0.986012843928692
LatentSpace_v7	Primary motor area	precuneus	5	0.985893748611972
LatentSpace_v7	Primary motor area	Heschl's gyrus	6	0.9810461768993529
LatentSpace_v7	Primary motor area	transverse gyri	7	0.9805221066394076
LatentSpace_v7	Primary motor area	superior parietal lobule	8	0.9769460358116705
LatentSpace_v7	Primary motor area	middle frontal gyrus	9	0.9765060252667599
LatentSpace_v7	Primary motor area	inferior frontal gyrus	10	0.9760309623262351
LatentSpace_v7	Primary motor area	inferior occipital gyrus	11	0.9746035929900834
LatentSpace_v7	Primary motor area	paracentral lobule, posterior part	12	0.969719189102848
LatentSpace_v7	Primary motor area	planum temporale	13	0.9688814056377857
LatentSpace_v7	Primary motor area	superior occipital gyrus	14	0.9687738310934725
LatentSpace_v7	Primary motor area	superior temporal gyrus	15	0.9653824903545085
LatentSpace_v7	Primary motor area	postcentral gyrus	16	0.9649944495348506
LatentSpace_v7	Primary motor area	superior frontal gyrus	17	0.9615262445610696
LatentSpace_v7	Primary motor area	middle temporal gyrus	18	0.952212863816021
LatentSpace_v7	Primary motor area	occipital pole	19	0.9376184074286866
LatentSpace_v7	Primary motor area	lateral orbital gyrus	20	0.9371722825921163
LatentSpace_v7	Primary motor area	frontal pole	21	0.9338276258742298
LatentSpace_v7	Primary motor area	anterior orbital gyrus	22	0.9185969721674616
LatentSpace_v7	Primary motor area	lingual gyrus	23	0.9124226602598898
LatentSpace_v7	Primary motor area	cuneus	24	0.9110871915610744
LatentSpace_v7	Primary motor area	posterior orbital gyrus	25	0.9100498938356807
LatentSpace_v7	Primary motor area	frontal operculum	26	0.8964689281155527
LatentSpace_v7	Primary motor area	inferior temporal gyrus	27	0.8910031468072219
LatentSpace_v7	Primary motor area	planum polare	28	0.8865221859955954
LatentSpace_v7	Primary motor area	cingulate gyrus	29	0.883123913141444
LatentSpace_v7	Primary motor area	superior rostral gyrus	30	0.8710153485515177
LatentSpace_v7	Primary motor area	medial orbital gyrus	31	0.8655736390025295
LatentSpace_v7	Primary motor area	gyrus rectus	32	0.835913980027142
LatentSpace_v7	Primary motor area	insula	33	0.8321090697950204
LatentSpace_v7	Primary motor area	fusiform gyrus	34	0.8211028741032232
LatentSpace_v7	Primary motor area	inferior rostral gyrus	35	0.8079201891093282
LatentSpace_v7	Primary motor area	temporal pole	36	0.6789096971382983
LatentSpace_v7	Primary motor area	claustrum	37	0.662358444854009
LatentSpace_v7	Primary motor area	parolfactory gyri	38	0.6183469421338985
LatentSpace_v7	Primary motor area	dentate gyrus	39	0.6177121905688547
LatentSpace_v7	Primary motor area	parahippocampal gyrus	40	0.5786913957744034
LatentSpace_v7	Primary motor area	CA1 field	41	0.5348019659254719
LatentSpace_v7	Primary motor area	CA3 field	42	0.46743612674700197
LatentSpace_v7	Primary motor area	CA2 field	43	0.44620957072319156
LatentSpace_v7	Primary motor area	subiculum	44	0.4084127682811796
LatentSpace_v7	Primary motor area	putamen	45	0.36154549302876227
LatentSpace_v7	Primary motor area	caudate nucleus	46	0.3575268068137185
LatentSpace_v7	Primary motor area	thalamus	47	0.33415318773951763
LatentSpace_v7	Primary motor area	paraterminal gyrus	48	0.33045472645493584
LatentSpace_v7	Primary motor area	inferior colliculus	49	0.310619783403848
LatentSpace_v7	Primary motor area	CA4 field	50	0.30421288036180605
LatentSpace_v7	Primary motor area	vermal V	51	0.25630978415087197
LatentSpace_v7	Primary motor area	superior colliculus	52	0.24617185915707973
LatentSpace_v7	Primary motor area	vermal VIIAf	53	0.24040709319670633
LatentSpace_v7	Primary motor area	vermal VIIB	54	0.2401984206028521
LatentSpace_v7	Primary motor area	subthalamus	55	0.2389314228594032
LatentSpace_v7	Primary motor area	cerebellar nuclei	56	0.23478907046332265
LatentSpace_v7	Primary motor area	nucleus accumbens	57	0.23108672493243776
LatentSpace_v7	Primary motor area	vermal IV	58	0.2260396049590937
LatentSpace_v7	Primary motor area	vermal III	59	0.22588406074815884
LatentSpace_v7	Primary motor area	vermal IX	60	0.22325904088789228
LatentSpace_v7	Primary motor area	IX	61	0.22279744274109026
LatentSpace_v7	Primary motor area	vermal VIIAt	62	0.22275989165219295
LatentSpace_v7	Primary motor area	vermal VIIIB	63	0.22078791267113632
LatentSpace_v7	Primary motor area	vermal VIIIA	64	0.21958026738427547
LatentSpace_v7	Primary motor area	VIIIA	65	0.21669688037479848
LatentSpace_v7	Primary motor area	globus pallidus	66	0.21440669106643626
LatentSpace_v7	Primary motor area	VIIB	67	0.21228643982440887
LatentSpace_v7	Primary motor area	crus II	68	0.21178269719597562
LatentSpace_v7	Primary motor area	VI	69	0.21076904482857298
LatentSpace_v7	Primary motor area	crus I	70	0.2078091080896185
LatentSpace_v7	Primary motor area	V	71	0.20632208711099756
LatentSpace_v7	Primary motor area	pons	72	0.19887671824887806
LatentSpace_v7	Primary motor area	myelencephalon	73	0.1971762835553964
LatentSpace_v7	Primary motor area	X	74	0.19294897415435555
LatentSpace_v7	Primary motor area	pretectal region	75	0.1893387007119016
LatentSpace_v7	Primary motor area	IV	76	0.18827182711288232
LatentSpace_v7	Primary motor area	III	77	0.17895451984475055
LatentSpace_v7	Primary motor area	vermal VI	78	0.17183778191571292
LatentSpace_v7	Primary motor area	VIIIB	79	0.16856570514507152
LatentSpace_v7	Primary motor area	vermal I-II	80	0.16845391494844691
LatentSpace_v7	Primary motor area	piriform cortex	81	0.13774460582731035
LatentSpace_v7	Primary motor area	vermal X	82	0.13348756930444694
LatentSpace_v7	Primary motor area	midbrain tegmentum	83	0.13146965484930512
LatentSpace_v7	Primary motor area	epithalamus	84	0.08225479935253749
LatentSpace_v7	Primary motor area	substantia innominata	85	0.059763431780283156
LatentSpace_v7	Primary motor area	septal nuclei	86	0.04532010504720677
LatentSpace_v7	Primary motor area	hypothalamus	87	0.011344936749858096
LatentSpace_v7	Primary motor area	amygdala	88	0
LatentSpace_v8	Primary motor area	paracentral lobule, anterior part	1	1
LatentSpace_v8	Primary motor area	occipito-temporal gyrus	2	0.9948992397410298
LatentSpace_v8	Primary motor area	inferior frontal gyrus	3	0.9923962670008457
LatentSpace_v8	Primary motor area	precuneus	4	0.9915608017096298
LatentSpace_v8	Primary motor area	inferior parietal lobule	5	0.9912927851670496
LatentSpace_v8	Primary motor area	transverse gyri	6	0.9900911218977105
LatentSpace_v8	Primary motor area	Heschl's gyrus	7	0.9874460006772091
LatentSpace_v8	Primary motor area	superior parietal lobule	8	0.9873139379961204
LatentSpace_v8	Primary motor area	middle frontal gyrus	9	0.982877851403009
LatentSpace_v8	Primary motor area	precentral gyrus	10	0.9822034622737235
LatentSpace_v8	Primary motor area	inferior occipital gyrus	11	0.9817149093577127
LatentSpace_v8	Primary motor area	superior temporal gyrus	12	0.9814699194591564
LatentSpace_v8	Primary motor area	superior occipital gyrus	13	0.9766611683658902
LatentSpace_v8	Primary motor area	superior frontal gyrus	14	0.9712792544286312
LatentSpace_v8	Primary motor area	middle temporal gyrus	15	0.9709737923449767
LatentSpace_v8	Primary motor area	planum temporale	16	0.9685496335854373
LatentSpace_v8	Primary motor area	postcentral gyrus	17	0.9660323413335504
LatentSpace_v8	Primary motor area	paracentral lobule, posterior part	18	0.9654796280777763
LatentSpace_v8	Primary motor area	lateral orbital gyrus	19	0.9623421616938699
LatentSpace_v8	Primary motor area	frontal pole	20	0.9572188868156315
LatentSpace_v8	Primary motor area	posterior orbital gyrus	21	0.9478930451770208
LatentSpace_v8	Primary motor area	frontal operculum	22	0.9433952268596222
LatentSpace_v8	Primary motor area	anterior orbital gyrus	23	0.9425596829984837
LatentSpace_v8	Primary motor area	occipital pole	24	0.9386021238732092
LatentSpace_v8	Primary motor area	planum polare	25	0.9349528185805596
LatentSpace_v8	Primary motor area	inferior temporal gyrus	26	0.9306513220028475
LatentSpace_v8	Primary motor area	lingual gyrus	27	0.9209478099376729
LatentSpace_v8	Primary motor area	medial orbital gyrus	28	0.9150734067824599
LatentSpace_v8	Primary motor area	superior rostral gyrus	29	0.9137362191239967
LatentSpace_v8	Primary motor area	cingulate gyrus	30	0.9133454929709912
LatentSpace_v8	Primary motor area	cuneus	31	0.912700856875708
LatentSpace_v8	Primary motor area	gyrus rectus	32	0.889302731517589
LatentSpace_v8	Primary motor area	insula	33	0.8839692314771084
LatentSpace_v8	Primary motor area	fusiform gyrus	34	0.8816257113573333
LatentSpace_v8	Primary motor area	inferior rostral gyrus	35	0.8773070112098582
LatentSpace_v8	Primary motor area	temporal pole	36	0.767331417929357
LatentSpace_v8	Primary motor area	parolfactory gyri	37	0.6849124791384089
LatentSpace_v8	Primary motor area	claustrum	38	0.6699504506025852
LatentSpace_v8	Primary motor area	parahippocampal gyrus	39	0.6675362560729738
LatentSpace_v8	Primary motor area	dentate gyrus	40	0.5502617953808191
LatentSpace_v8	Primary motor area	CA1 field	41	0.4512389390124627
LatentSpace_v8	Primary motor area	subiculum	42	0.3799475124531189
LatentSpace_v8	Primary motor area	CA2 field	43	0.35073405954190334
LatentSpace_v8	Primary motor area	CA3 field	44	0.32243951004579785
LatentSpace_v8	Primary motor area	paraterminal gyrus	45	0.31570286122219654
LatentSpace_v8	Primary motor area	vermal V	46	0.2544931479505194
LatentSpace_v8	Primary motor area	putamen	47	0.2516689383688805
LatentSpace_v8	Primary motor area	VIIIA	48	0.2503775933299146
LatentSpace_v8	Primary motor area	crus II	49	0.24913540197853154
LatentSpace_v8	Primary motor area	IX	50	0.24692875872335784
LatentSpace_v8	Primary motor area	vermal VIIAt	51	0.24497531534542083
LatentSpace_v8	Primary motor area	globus pallidus	52	0.24497306301306657
LatentSpace_v8	Primary motor area	V	53	0.24390071003969174
LatentSpace_v8	Primary motor area	subthalamus	54	0.24346749810922202
LatentSpace_v8	Primary motor area	VI	55	0.24345202619624526
LatentSpace_v8	Primary motor area	cerebellar nuclei	56	0.23881265568895768
LatentSpace_v8	Primary motor area	caudate nucleus	57	0.23863781580681706
LatentSpace_v8	Primary motor area	crus I	58	0.2352459972500449
LatentSpace_v8	Primary motor area	VIIB	59	0.23433089879452404
LatentSpace_v8	Primary motor area	pons	60	0.23274436314911343
LatentSpace_v8	Primary motor area	IV	61	0.22935752087311356
LatentSpace_v8	Primary motor area	vermal VIIAf	62	0.22813178344191395
LatentSpace_v8	Primary motor area	thalamus	63	0.22764584389307418
LatentSpace_v8	Primary motor area	III	64	0.2252455624967015
LatentSpace_v8	Primary motor area	superior colliculus	65	0.223083907106479
LatentSpace_v8	Primary motor area	vermal VIIIA	66	0.22234754783091185
LatentSpace_v8	Primary motor area	vermal IV	67	0.2218951521123483
LatentSpace_v8	Primary motor area	myelencephalon	68	0.22102164388907097
LatentSpace_v8	Primary motor area	VIIIB	69	0.2205147985396938
LatentSpace_v8	Primary motor area	vermal VIIB	70	0.21952089261290186
LatentSpace_v8	Primary motor area	vermal III	71	0.21758041452863605
LatentSpace_v8	Primary motor area	vermal IX	72	0.21467617649811824
LatentSpace_v8	Primary motor area	pretectal region	73	0.20607826844986277
LatentSpace_v8	Primary motor area	X	74	0.2028654195917427
LatentSpace_v8	Primary motor area	midbrain tegmentum	75	0.19802244761020568
LatentSpace_v8	Primary motor area	vermal VI	76	0.19243783898507721
LatentSpace_v8	Primary motor area	vermal VIIIB	77	0.1922842590490821
LatentSpace_v8	Primary motor area	vermal I-II	78	0.1861293701664578
LatentSpace_v8	Primary motor area	inferior colliculus	79	0.18563917295089544
LatentSpace_v8	Primary motor area	piriform cortex	80	0.1783177161292519
LatentSpace_v8	Primary motor area	vermal X	81	0.14717879123840358
LatentSpace_v8	Primary motor area	CA4 field	82	0.14399559611516416
LatentSpace_v8	Primary motor area	nucleus accumbens	83	0.1423357799295376
LatentSpace_v8	Primary motor area	epithalamus	84	0.10814691357211391
LatentSpace_v8	Primary motor area	substantia innominata	85	0.07815432710172183
LatentSpace_v8	Primary motor area	hypothalamus	86	0.06275261961367738
LatentSpace_v8	Primary motor area	septal nuclei	87	0.00586617099571123
LatentSpace_v8	Primary motor area	amygdala	88	0
LatentSpace_v9	Primary motor area	paracentral lobule, anterior part	1	1
LatentSpace_v9	Primary motor area	precentral gyrus	2	0.9911414143871583
LatentSpace_v9	Primary motor area	precuneus	3	0.9678921547005505
LatentSpace_v9	Primary motor area	superior parietal lobule	4	0.9666370482876266
LatentSpace_v9	Primary motor area	occipito-temporal gyrus	5	0.9648125002973802
LatentSpace_v9	Primary motor area	inferior occipital gyrus	6	0.9585756618315051
LatentSpace_v9	Primary motor area	superior occipital gyrus	7	0.9560213635488005
LatentSpace_v9	Primary motor area	inferior frontal gyrus	8	0.955302094325897
LatentSpace_v9	Primary motor area	middle frontal gyrus	9	0.9542735179785846
LatentSpace_v9	Primary motor area	transverse gyri	10	0.9536818195156889
LatentSpace_v9	Primary motor area	inferior parietal lobule	11	0.9522898524838281
LatentSpace_v9	Primary motor area	Heschl's gyrus	12	0.9499006918373537
LatentSpace_v9	Primary motor area	postcentral gyrus	13	0.9450224944900965
LatentSpace_v9	Primary motor area	paracentral lobule, posterior part	14	0.9385275059545339
LatentSpace_v9	Primary motor area	superior frontal gyrus	15	0.9365323042181245
LatentSpace_v9	Primary motor area	frontal pole	16	0.9340507552376859
LatentSpace_v9	Primary motor area	superior temporal gyrus	17	0.933871975116945
LatentSpace_v9	Primary motor area	lateral orbital gyrus	18	0.9238724478257085
LatentSpace_v9	Primary motor area	planum temporale	19	0.9215163962805317
LatentSpace_v9	Primary motor area	middle temporal gyrus	20	0.9214406106412647
LatentSpace_v9	Primary motor area	posterior orbital gyrus	21	0.9074002773287239
LatentSpace_v9	Primary motor area	anterior orbital gyrus	22	0.9017935314053591
LatentSpace_v9	Primary motor area	occipital pole	23	0.8948185605240663
LatentSpace_v9	Primary motor area	frontal operculum	24	0.8748657076312059
LatentSpace_v9	Primary motor area	cuneus	25	0.8734337725045399
LatentSpace_v9	Primary motor area	lingual gyrus	26	0.8655010537021988
LatentSpace_v9	Primary motor area	cingulate gyrus	27	0.8627884586791674
LatentSpace_v9	Primary motor area	inferior temporal gyrus	28	0.8579566858151526
LatentSpace_v9	Primary motor area	superior rostral gyrus	29	0.8437113625122522
LatentSpace_v9	Primary motor area	medial orbital gyrus	30	0.8416124510244609
LatentSpace_v9	Primary motor area	planum polare	31	0.8370399789856512
LatentSpace_v9	Primary motor area	gyrus rectus	32	0.7936975805329053
LatentSpace_v9	Primary motor area	fusiform gyrus	33	0.7824687268682451
LatentSpace_v9	Primary motor area	insula	34	0.7755145355610361
LatentSpace_v9	Primary motor area	inferior rostral gyrus	35	0.7742098906274114
LatentSpace_v9	Primary motor area	claustrum	36	0.7343675600687729
LatentSpace_v9	Primary motor area	temporal pole	37	0.6257448809494225
LatentSpace_v9	Primary motor area	parolfactory gyri	38	0.5781877193726586
LatentSpace_v9	Primary motor area	parahippocampal gyrus	39	0.5762862282403813
LatentSpace_v9	Primary motor area	vermal VIIAt	40	0.4615551617065774
LatentSpace_v9	Primary motor area	vermal V	41	0.4575581917426675
LatentSpace_v9	Primary motor area	VIIIA	42	0.4565435617672717
LatentSpace_v9	Primary motor area	vermal VIIIA	43	0.4547878742737568
LatentSpace_v9	Primary motor area	crus II	44	0.45324189975831264
LatentSpace_v9	Primary motor area	IX	45	0.45298050185128436
LatentSpace_v9	Primary motor area	VIIB	46	0.44607293851819574
LatentSpace_v9	Primary motor area	vermal IX	47	0.443658878422212
LatentSpace_v9	Primary motor area	vermal VIIAf	48	0.4432830574227288
LatentSpace_v9	Primary motor area	crus I	49	0.4422451865113227
LatentSpace_v9	Primary motor area	vermal VIIB	50	0.44125251080634187
LatentSpace_v9	Primary motor area	VI	51	0.43199581447950536
LatentSpace_v9	Primary motor area	vermal IV	52	0.4315758387128982
LatentSpace_v9	Primary motor area	V	53	0.4282799840347167
LatentSpace_v9	Primary motor area	vermal VIIIB	54	0.4238331951930452
LatentSpace_v9	Primary motor area	vermal III	55	0.4237739379233448
LatentSpace_v9	Primary motor area	IV	56	0.41359279706395635
LatentSpace_v9	Primary motor area	VIIIB	57	0.4083794508578077
LatentSpace_v9	Primary motor area	X	58	0.3964362820738349
LatentSpace_v9	Primary motor area	III	59	0.3927604991386308
LatentSpace_v9	Primary motor area	vermal VI	60	0.39216321718948915
LatentSpace_v9	Primary motor area	CA1 field	61	0.37979699746864415
LatentSpace_v9	Primary motor area	dentate gyrus	62	0.37817639384631435
LatentSpace_v9	Primary motor area	subiculum	63	0.3604244692818959
LatentSpace_v9	Primary motor area	paraterminal gyrus	64	0.32837309815119375
LatentSpace_v9	Primary motor area	vermal I-II	65	0.31613732207691764
LatentSpace_v9	Primary motor area	vermal X	66	0.3160247380500883
LatentSpace_v9	Primary motor area	CA2 field	67	0.27359677437297253
LatentSpace_v9	Primary motor area	thalamus	68	0.2719071316521539
LatentSpace_v9	Primary motor area	CA3 field	69	0.268547926198515
LatentSpace_v9	Primary motor area	inferior colliculus	70	0.24695621849163382
LatentSpace_v9	Primary motor area	caudate nucleus	71	0.24531574384881685
LatentSpace_v9	Primary motor area	putamen	72	0.23726137538357475
LatentSpace_v9	Primary motor area	superior colliculus	73	0.20185982756850873
LatentSpace_v9	Primary motor area	piriform cortex	74	0.18842417675209072
LatentSpace_v9	Primary motor area	cerebellar nuclei	75	0.17731425984894003
LatentSpace_v9	Primary motor area	subthalamus	76	0.16968901610007514
LatentSpace_v9	Primary motor area	nucleus accumbens	77	0.15713129191571168
LatentSpace_v9	Primary motor area	myelencephalon	78	0.15687993337236805
LatentSpace_v9	Primary motor area	pons	79	0.14610882757673455
LatentSpace_v9	Primary motor area	pretectal region	80	0.14300483578616238
LatentSpace_v9	Primary motor area	CA4 field	81	0.13395741832543598
LatentSpace_v9	Primary motor area	globus pallidus	82	0.11920803461245737
LatentSpace_v9	Primary motor area	midbrain tegmentum	83	0.1145405684395178
LatentSpace_v9	Primary motor area	epithalamus	84	0.1127275425544259
LatentSpace_v9	Primary motor area	amygdala	85	0.06367536401588984
LatentSpace_v9	Primary motor area	hypothalamus	86	0.050338287951342674
LatentSpace_v9	Primary motor area	substantia innominata	87	0.03499945269784064
LatentSpace_v9	Primary motor area	septal nuclei	88	0
LatentSpace_v10	Primary motor area	paracentral lobule, anterior part	1	1
LatentSpace_v10	Primary motor area	precentral gyrus	2	0.9799473164584984
LatentSpace_v10	Primary motor area	precuneus	3	0.9757041281169485
LatentSpace_v10	Primary motor area	superior parietal lobule	4	0.9739769635286839
LatentSpace_v10	Primary motor area	occipito-temporal gyrus	5	0.9687006117714317
LatentSpace_v10	Primary motor area	inferior parietal lobule	6	0.9668714437205211
LatentSpace_v10	Primary motor area	inferior frontal gyrus	7	0.9615414486991634
LatentSpace_v10	Primary motor area	postcentral gyrus	8	0.9607193204985238
LatentSpace_v10	Primary motor area	inferior occipital gyrus	9	0.9596629959119649
LatentSpace_v10	Primary motor area	superior occipital gyrus	10	0.9590991093581401
LatentSpace_v10	Primary motor area	transverse gyri	11	0.9584704168985335
LatentSpace_v10	Primary motor area	Heschl's gyrus	12	0.955284355359313
LatentSpace_v10	Primary motor area	middle frontal gyrus	13	0.953519584433246
LatentSpace_v10	Primary motor area	paracentral lobule, posterior part	14	0.9507289017917139
LatentSpace_v10	Primary motor area	superior temporal gyrus	15	0.9458721787292971
LatentSpace_v10	Primary motor area	planum temporale	16	0.9410277815140863
LatentSpace_v10	Primary motor area	superior frontal gyrus	17	0.9388904568061288
LatentSpace_v10	Primary motor area	frontal pole	18	0.9375398904539761
LatentSpace_v10	Primary motor area	middle temporal gyrus	19	0.9307193384782554
LatentSpace_v10	Primary motor area	lateral orbital gyrus	20	0.9202100910064683
LatentSpace_v10	Primary motor area	occipital pole	21	0.9178255997555894
LatentSpace_v10	Primary motor area	posterior orbital gyrus	22	0.9162579805075302
LatentSpace_v10	Primary motor area	anterior orbital gyrus	23	0.8985965293243492
LatentSpace_v10	Primary motor area	cuneus	24	0.8984705960336871
LatentSpace_v10	Primary motor area	frontal operculum	25	0.8931574500819334
LatentSpace_v10	Primary motor area	lingual gyrus	26	0.8901277278495427
LatentSpace_v10	Primary motor area	cingulate gyrus	27	0.8839460547005815
LatentSpace_v10	Primary motor area	planum polare	28	0.8653284461899994
LatentSpace_v10	Primary motor area	inferior temporal gyrus	29	0.8649142530325697
LatentSpace_v10	Primary motor area	superior rostral gyrus	30	0.855440986994399
LatentSpace_v10	Primary motor area	medial orbital gyrus	31	0.8471682899349398
LatentSpace_v10	Primary motor area	gyrus rectus	32	0.8200935242979966
LatentSpace_v10	Primary motor area	insula	33	0.8107130644656447
LatentSpace_v10	Primary motor area	inferior rostral gyrus	34	0.7941590604261844
LatentSpace_v10	Primary motor area	fusiform gyrus	35	0.7901060287184861
LatentSpace_v10	Primary motor area	claustrum	36	0.7663972098188474
LatentSpace_v10	Primary motor area	temporal pole	37	0.6556051116432415
LatentSpace_v10	Primary motor area	parolfactory gyri	38	0.6147726557914724
LatentSpace_v10	Primary motor area	parahippocampal gyrus	39	0.583717392907229
LatentSpace_v10	Primary motor area	IX	40	0.5311815108717854
LatentSpace_v10	Primary motor area	vermal VIIAt	41	0.5253281084482283
LatentSpace_v10	Primary motor area	crus II	42	0.5178895370920896
LatentSpace_v10	Primary motor area	VIIIA	43	0.5158523126215253
LatentSpace_v10	Primary motor area	vermal VIIAf	44	0.5143738806056806
LatentSpace_v10	Primary motor area	VIIB	45	0.510696736694006
LatentSpace_v10	Primary motor area	vermal V	46	0.5093944555352976
LatentSpace_v10	Primary motor area	crus I	47	0.5002740716668882
LatentSpace_v10	Primary motor area	vermal VIIB	48	0.4988246085065051
LatentSpace_v10	Primary motor area	V	49	0.49779851366606637
LatentSpace_v10	Primary motor area	VI	50	0.4962316014053618
LatentSpace_v10	Primary motor area	vermal VIIIA	51	0.4937914411097444
LatentSpace_v10	Primary motor area	vermal IV	52	0.48705206943318663
LatentSpace_v10	Primary motor area	IV	53	0.4870025609367498
LatentSpace_v10	Primary motor area	VIIIB	54	0.48489235031507805
LatentSpace_v10	Primary motor area	III	55	0.4834065703827682
LatentSpace_v10	Primary motor area	vermal III	56	0.4760845695321704
LatentSpace_v10	Primary motor area	vermal IX	57	0.4760187303544327
LatentSpace_v10	Primary motor area	vermal VIIIB	58	0.46398232477655055
LatentSpace_v10	Primary motor area	vermal VI	59	0.4559848810896165
LatentSpace_v10	Primary motor area	X	60	0.4313480418351097
LatentSpace_v10	Primary motor area	vermal I-II	61	0.40850257441506016
LatentSpace_v10	Primary motor area	paraterminal gyrus	62	0.40743124714749984
LatentSpace_v10	Primary motor area	dentate gyrus	63	0.39856423987700884
LatentSpace_v10	Primary motor area	putamen	64	0.35044596126692923
LatentSpace_v10	Primary motor area	caudate nucleus	65	0.33679717069910925
LatentSpace_v10	Primary motor area	vermal X	66	0.32242597878597284
LatentSpace_v10	Primary motor area	CA1 field	67	0.29400263476651384
LatentSpace_v10	Primary motor area	globus pallidus	68	0.26565335290660536
LatentSpace_v10	Primary motor area	subiculum	69	0.2407091825179961
LatentSpace_v10	Primary motor area	thalamus	70	0.23825368062478058
LatentSpace_v10	Primary motor area	cerebellar nuclei	71	0.21525729558144072
LatentSpace_v10	Primary motor area	inferior colliculus	72	0.21324754539527796
LatentSpace_v10	Primary motor area	nucleus accumbens	73	0.20976899582630887
LatentSpace_v10	Primary motor area	CA3 field	74	0.1938026559337692
LatentSpace_v10	Primary motor area	CA2 field	75	0.18948963642549835
LatentSpace_v10	Primary motor area	myelencephalon	76	0.1823836757225882
LatentSpace_v10	Primary motor area	subthalamus	77	0.17942540689021094
LatentSpace_v10	Primary motor area	epithalamus	78	0.174620683030049
LatentSpace_v10	Primary motor area	pretectal region	79	0.17278656829922867
LatentSpace_v10	Primary motor area	superior colliculus	80	0.17054041733171127
LatentSpace_v10	Primary motor area	pons	81	0.16813715853403507
LatentSpace_v10	Primary motor area	midbrain tegmentum	82	0.14717081614627278
LatentSpace_v10	Primary motor area	piriform cortex	83	0.12618101333885642
LatentSpace_v10	Primary motor area	substantia innominata	84	0.07559294221597179
LatentSpace_v10	Primary motor area	hypothalamus	85	0.07534620519115794
LatentSpace_v10	Primary motor area	CA4 field	86	0.05529210814117176
LatentSpace_v10	Primary motor area	septal nuclei	87	0.036277158306860006
LatentSpace_v10	Primary motor area	amygdala	88	0
LatentSpace_v11	Primary motor area	paracentral lobule, anterior part	1	1
LatentSpace_v11	Primary motor area	precentral gyrus	2	0.9833020422148511
LatentSpace_v11	Primary motor area	inferior parietal lobule	3	0.9754102328378512
LatentSpace_v11	Primary motor area	precuneus	4	0.9737964078257008
LatentSpace_v11	Primary motor area	middle frontal gyrus	5	0.970187431876923
LatentSpace_v11	Primary motor area	occipito-temporal gyrus	6	0.9683562886604101
LatentSpace_v11	Primary motor area	inferior frontal gyrus	7	0.9681497634775823
LatentSpace_v11	Primary motor area	superior parietal lobule	8	0.9659789593180476
LatentSpace_v11	Primary motor area	paracentral lobule, posterior part	9	0.9621331656451777
LatentSpace_v11	Primary motor area	superior temporal gyrus	10	0.9554083895419039
LatentSpace_v11	Primary motor area	superior frontal gyrus	11	0.9550344306530146
LatentSpace_v11	Primary motor area	planum temporale	12	0.9527810080536357
LatentSpace_v11	Primary motor area	Heschl's gyrus	13	0.9518153823064722
LatentSpace_v11	Primary motor area	transverse gyri	14	0.9484726691719552
LatentSpace_v11	Primary motor area	inferior occipital gyrus	15	0.9427160861487466
LatentSpace_v11	Primary motor area	middle temporal gyrus	16	0.9381582465931618
LatentSpace_v11	Primary motor area	superior occipital gyrus	17	0.9372460011544433
LatentSpace_v11	Primary motor area	postcentral gyrus	18	0.9336557849223511
LatentSpace_v11	Primary motor area	lateral orbital gyrus	19	0.9235223622374787
LatentSpace_v11	Primary motor area	frontal pole	20	0.9190457890184627
LatentSpace_v11	Primary motor area	occipital pole	21	0.9152673755399837
LatentSpace_v11	Primary motor area	anterior orbital gyrus	22	0.8970479140932001
LatentSpace_v11	Primary motor area	frontal operculum	23	0.8914447824625904
LatentSpace_v11	Primary motor area	cingulate gyrus	24	0.8905788851104203
LatentSpace_v11	Primary motor area	posterior orbital gyrus	25	0.8842345570531188
LatentSpace_v11	Primary motor area	inferior temporal gyrus	26	0.8791433309373988
LatentSpace_v11	Primary motor area	superior rostral gyrus	27	0.869902231155879
LatentSpace_v11	Primary motor area	planum polare	28	0.8619129963167503
LatentSpace_v11	Primary motor area	lingual gyrus	29	0.8493834644189868
LatentSpace_v11	Primary motor area	cuneus	30	0.8478377751792049
LatentSpace_v11	Primary motor area	medial orbital gyrus	31	0.8473259194781558
LatentSpace_v11	Primary motor area	insula	32	0.8193755674685376
LatentSpace_v11	Primary motor area	gyrus rectus	33	0.8178344222400636
LatentSpace_v11	Primary motor area	inferior rostral gyrus	34	0.8057666581680604
LatentSpace_v11	Primary motor area	fusiform gyrus	35	0.8046117357718666
LatentSpace_v11	Primary motor area	claustrum	36	0.6915927013479324
LatentSpace_v11	Primary motor area	temporal pole	37	0.6435370382825845
LatentSpace_v11	Primary motor area	parolfactory gyri	38	0.6069068898418112
LatentSpace_v11	Primary motor area	parahippocampal gyrus	39	0.5725180074043829
LatentSpace_v11	Primary motor area	dentate gyrus	40	0.471321278224259
LatentSpace_v11	Primary motor area	paraterminal gyrus	41	0.45416767323121365
LatentSpace_v11	Primary motor area	CA1 field	42	0.40271158730922585
LatentSpace_v11	Primary motor area	subiculum	43	0.3148227816229494
LatentSpace_v11	Primary motor area	pons	44	0.24019383473097256
LatentSpace_v11	Primary motor area	thalamus	45	0.23568623383629375
LatentSpace_v11	Primary motor area	subthalamus	46	0.2296864239683552
LatentSpace_v11	Primary motor area	myelencephalon	47	0.22863466903075752
LatentSpace_v11	Primary motor area	CA2 field	48	0.2241401461366866
LatentSpace_v11	Primary motor area	CA3 field	49	0.21810145041269302
LatentSpace_v11	Primary motor area	superior colliculus	50	0.21353885941146555
LatentSpace_v11	Primary motor area	cerebellar nuclei	51	0.2055980873923681
LatentSpace_v11	Primary motor area	midbrain tegmentum	52	0.20043984806274515
LatentSpace_v11	Primary motor area	vermal VIIB	53	0.19888327754603347
LatentSpace_v11	Primary motor area	inferior colliculus	54	0.1970027293591169
LatentSpace_v11	Primary motor area	vermal IX	55	0.19595528172141152
LatentSpace_v11	Primary motor area	vermal III	56	0.19559606175360156
LatentSpace_v11	Primary motor area	vermal VIIIB	57	0.19117651743705255
LatentSpace_v11	Primary motor area	vermal I-II	58	0.19099077187016927
LatentSpace_v11	Primary motor area	IX	59	0.19051538089697947
LatentSpace_v11	Primary motor area	vermal V	60	0.19038484628020597
LatentSpace_v11	Primary motor area	vermal VIIIA	61	0.18833172858817301
LatentSpace_v11	Primary motor area	pretectal region	62	0.18800580340919149
LatentSpace_v11	Primary motor area	crus II	63	0.18654619539270728
LatentSpace_v11	Primary motor area	vermal IV	64	0.18522495308446743
LatentSpace_v11	Primary motor area	VIIB	65	0.1848471901910532
LatentSpace_v11	Primary motor area	VIIIA	66	0.18445838474388979
LatentSpace_v11	Primary motor area	globus pallidus	67	0.18387998093896368
LatentSpace_v11	Primary motor area	vermal X	68	0.18339696948930073
LatentSpace_v11	Primary motor area	vermal VIIAf	69	0.1830776995509917
LatentSpace_v11	Primary motor area	crus I	70	0.18144398983016763
LatentSpace_v11	Primary motor area	V	71	0.18132149973057257
LatentSpace_v11	Primary motor area	IV	72	0.1812064019088256
LatentSpace_v11	Primary motor area	vermal VIIAt	73	0.18082634525416347
LatentSpace_v11	Primary motor area	VI	74	0.17991081943565423
LatentSpace_v11	Primary motor area	X	75	0.17571417539047743
LatentSpace_v11	Primary motor area	III	76	0.17417147925838738
LatentSpace_v11	Primary motor area	caudate nucleus	77	0.1690182785163251
LatentSpace_v11	Primary motor area	VIIIB	78	0.16884245143309334
LatentSpace_v11	Primary motor area	piriform cortex	79	0.16651530621159363
LatentSpace_v11	Primary motor area	vermal VI	80	0.16179278756847212
LatentSpace_v11	Primary motor area	putamen	81	0.15387617609538753
LatentSpace_v11	Primary motor area	epithalamus	82	0.15341304234731107
LatentSpace_v11	Primary motor area	hypothalamus	83	0.14973427766521757
LatentSpace_v11	Primary motor area	nucleus accumbens	84	0.08574866589702428
LatentSpace_v11	Primary motor area	CA4 field	85	0.07223527918788042
LatentSpace_v11	Primary motor area	substantia innominata	86	0.07129587768287274
LatentSpace_v11	Primary motor area	septal nuclei	87	0.00728387513159304
LatentSpace_v11	Primary motor area	amygdala	88	0
LatentSpace_v12	Primary motor area	paracentral lobule, anterior part	1	1
LatentSpace_v12	Primary motor area	precentral gyrus	2	0.9858311427894726
LatentSpace_v12	Primary motor area	precuneus	3	0.9701654856878332
LatentSpace_v12	Primary motor area	occipito-temporal gyrus	4	0.9701313780296613
LatentSpace_v12	Primary motor area	superior parietal lobule	5	0.9697614784291455
LatentSpace_v12	Primary motor area	inferior occipital gyrus	6	0.9640973510423104
LatentSpace_v12	Primary motor area	transverse gyri	7	0.960841459028922
LatentSpace_v12	Primary motor area	superior occipital gyrus	8	0.9574849970603821
LatentSpace_v12	Primary motor area	Heschl's gyrus	9	0.9570829688464609
LatentSpace_v12	Primary motor area	inferior parietal lobule	10	0.9556714362836808
LatentSpace_v12	Primary motor area	postcentral gyrus	11	0.9476908434438684
LatentSpace_v12	Primary motor area	inferior frontal gyrus	12	0.9431376172444443
LatentSpace_v12	Primary motor area	middle frontal gyrus	13	0.9400833979727132
LatentSpace_v12	Primary motor area	paracentral lobule, posterior part	14	0.9296861260688066
LatentSpace_v12	Primary motor area	planum temporale	15	0.92901235124818
LatentSpace_v12	Primary motor area	occipital pole	16	0.925108819275945
LatentSpace_v12	Primary motor area	superior temporal gyrus	17	0.9208822842180643
LatentSpace_v12	Primary motor area	superior frontal gyrus	18	0.9151251409576177
LatentSpace_v12	Primary motor area	frontal pole	19	0.907340235946192
LatentSpace_v12	Primary motor area	middle temporal gyrus	20	0.9007146291703184
LatentSpace_v12	Primary motor area	lateral orbital gyrus	21	0.8950790086261207
LatentSpace_v12	Primary motor area	lingual gyrus	22	0.8895069199531951
LatentSpace_v12	Primary motor area	cuneus	23	0.8846667262790086
LatentSpace_v12	Primary motor area	posterior orbital gyrus	24	0.8685016434373685
LatentSpace_v12	Primary motor area	anterior orbital gyrus	25	0.8653346212954987
LatentSpace_v12	Primary motor area	frontal operculum	26	0.8459520864520846
LatentSpace_v12	Primary motor area	cingulate gyrus	27	0.8278213143724152
LatentSpace_v12	Primary motor area	inferior temporal gyrus	28	0.8155789849966738
LatentSpace_v12	Primary motor area	planum polare	29	0.8122836827525697
LatentSpace_v12	Primary motor area	superior rostral gyrus	30	0.8032107234467123
LatentSpace_v12	Primary motor area	medial orbital gyrus	31	0.7870061674818086
LatentSpace_v12	Primary motor area	gyrus rectus	32	0.7503789141215588
LatentSpace_v12	Primary motor area	insula	33	0.7420244873496074
LatentSpace_v12	Primary motor area	fusiform gyrus	34	0.7226332369407995
LatentSpace_v12	Primary motor area	inferior rostral gyrus	35	0.7186519017282258
LatentSpace_v12	Primary motor area	claustrum	36	0.6754648440455591
LatentSpace_v12	Primary motor area	temporal pole	37	0.5693204425441382
LatentSpace_v12	Primary motor area	parolfactory gyri	38	0.5202349098564714
LatentSpace_v12	Primary motor area	parahippocampal gyrus	39	0.5039681070956723
LatentSpace_v12	Primary motor area	putamen	40	0.43886325731272957
LatentSpace_v12	Primary motor area	caudate nucleus	41	0.4211504827181056
LatentSpace_v12	Primary motor area	paraterminal gyrus	42	0.3465580083746563
LatentSpace_v12	Primary motor area	nucleus accumbens	43	0.3412334603886213
LatentSpace_v12	Primary motor area	vermal VIIIB	44	0.3371135301158502
LatentSpace_v12	Primary motor area	inferior colliculus	45	0.3270957971213927
LatentSpace_v12	Primary motor area	vermal I-II	46	0.3222044691224517
LatentSpace_v12	Primary motor area	vermal VIIB	47	0.3212848785435568
LatentSpace_v12	Primary motor area	vermal VIIIA	48	0.3176369443185122
LatentSpace_v12	Primary motor area	vermal III	49	0.3172927732039895
LatentSpace_v12	Primary motor area	vermal X	50	0.316071043206748
LatentSpace_v12	Primary motor area	dentate gyrus	51	0.3129287574634026
LatentSpace_v12	Primary motor area	vermal IX	52	0.310422735851499
LatentSpace_v12	Primary motor area	vermal IV	53	0.3076074907247168
LatentSpace_v12	Primary motor area	III	54	0.2981893315026505
LatentSpace_v12	Primary motor area	vermal V	55	0.2949471316473287
LatentSpace_v12	Primary motor area	vermal VIIAf	56	0.29336997695144945
LatentSpace_v12	Primary motor area	vermal VIIAt	57	0.29331525415983484
LatentSpace_v12	Primary motor area	VIIB	58	0.2863454273910597
LatentSpace_v12	Primary motor area	VIIIA	59	0.2809328087650244
LatentSpace_v12	Primary motor area	V	60	0.27888047371621266
LatentSpace_v12	Primary motor area	VI	61	0.27621269658870784
LatentSpace_v12	Primary motor area	X	62	0.27584297935483437
LatentSpace_v12	Primary motor area	crus II	63	0.2757687002784281
LatentSpace_v12	Primary motor area	crus I	64	0.2747134454583671
LatentSpace_v12	Primary motor area	superior colliculus	65	0.27447482242920823
LatentSpace_v12	Primary motor area	vermal VI	66	0.2706484156668968
LatentSpace_v12	Primary motor area	VIIIB	67	0.2673197107936921
LatentSpace_v12	Primary motor area	IV	68	0.26646803386664375
LatentSpace_v12	Primary motor area	IX	69	0.264147522793981
LatentSpace_v12	Primary motor area	CA1 field	70	0.25688267229127515
LatentSpace_v12	Primary motor area	pretectal region	71	0.23675134813177562
LatentSpace_v12	Primary motor area	septal nuclei	72	0.2303989783982905
LatentSpace_v12	Primary motor area	subiculum	73	0.22621680471650182
LatentSpace_v12	Primary motor area	epithalamus	74	0.22227542219489899
LatentSpace_v12	Primary motor area	globus pallidus	75	0.2160919803292751
LatentSpace_v12	Primary motor area	substantia innominata	76	0.21208714692369415
LatentSpace_v12	Primary motor area	cerebellar nuclei	77	0.19078381424494326
LatentSpace_v12	Primary motor area	hypothalamus	78	0.18538740795443795
LatentSpace_v12	Primary motor area	thalamus	79	0.18530406649293546
LatentSpace_v12	Primary motor area	midbrain tegmentum	80	0.1762015215449692
LatentSpace_v12	Primary motor area	myelencephalon	81	0.17115908759054863
LatentSpace_v12	Primary motor area	piriform cortex	82	0.16986043380819496
LatentSpace_v12	Primary motor area	subthalamus	83	0.14994147738458927
LatentSpace_v12	Primary motor area	pons	84	0.14560741328736204
LatentSpace_v12	Primary motor area	CA2 field	85	0.0880995607695581
LatentSpace_v12	Primary motor area	CA3 field	86	0.08076623036152683
LatentSpace_v12	Primary motor area	amygdala	87	0.0747012764244334
LatentSpace_v12	Primary motor area	CA4 field	88	0
LatentSpace_v13	Primary motor area	paracentral lobule, anterior part	1	1
LatentSpace_v13	Primary motor area	precuneus	2	0.9913775864697303
LatentSpace_v13	Primary motor area	occipito-temporal gyrus	3	0.9900270426353154
LatentSpace_v13	Primary motor area	precentral gyrus	4	0.9893602578860534
LatentSpace_v13	Primary motor area	inferior parietal lobule	5	0.9859794409022234
LatentSpace_v13	Primary motor area	superior parietal lobule	6	0.9844767299050962
LatentSpace_v13	Primary motor area	transverse gyri	7	0.9803796621643941
LatentSpace_v13	Primary motor area	middle frontal gyrus	8	0.9735478520055626
LatentSpace_v13	Primary motor area	Heschl's gyrus	9	0.9730756616636419
LatentSpace_v13	Primary motor area	inferior frontal gyrus	10	0.971582545523257
LatentSpace_v13	Primary motor area	paracentral lobule, posterior part	11	0.9702970777665775
LatentSpace_v13	Primary motor area	planum temporale	12	0.967340786604611
LatentSpace_v13	Primary motor area	inferior occipital gyrus	13	0.9656026069799981
LatentSpace_v13	Primary motor area	superior occipital gyrus	14	0.9631611042012305
LatentSpace_v13	Primary motor area	superior temporal gyrus	15	0.9597101144636226
LatentSpace_v13	Primary motor area	postcentral gyrus	16	0.9577566620017165
LatentSpace_v13	Primary motor area	superior frontal gyrus	17	0.9518692342347024
LatentSpace_v13	Primary motor area	middle temporal gyrus	18	0.944006107784995
LatentSpace_v13	Primary motor area	frontal pole	19	0.9434963120470037
LatentSpace_v13	Primary motor area	lateral orbital gyrus	20	0.9420111777332695
LatentSpace_v13	Primary motor area	occipital pole	21	0.9253234519731384
LatentSpace_v13	Primary motor area	posterior orbital gyrus	22	0.9107553434849782
LatentSpace_v13	Primary motor area	anterior orbital gyrus	23	0.9052720131898933
LatentSpace_v13	Primary motor area	lingual gyrus	24	0.8998460807564669
LatentSpace_v13	Primary motor area	cuneus	25	0.8957265072367442
LatentSpace_v13	Primary motor area	frontal operculum	26	0.8852037218997116
LatentSpace_v13	Primary motor area	inferior temporal gyrus	27	0.8748760988318098
LatentSpace_v13	Primary motor area	cingulate gyrus	28	0.8621314066049052
LatentSpace_v13	Primary motor area	planum polare	29	0.8585636662707341
LatentSpace_v13	Primary motor area	superior rostral gyrus	30	0.8511252432470643
LatentSpace_v13	Primary motor area	medial orbital gyrus	31	0.8419043061229611
LatentSpace_v13	Primary motor area	gyrus rectus	32	0.8060847167229964
LatentSpace_v13	Primary motor area	insula	33	0.7976624032740742
LatentSpace_v13	Primary motor area	fusiform gyrus	34	0.7914180726412439
LatentSpace_v13	Primary motor area	inferior rostral gyrus	35	0.7879119255404585
LatentSpace_v13	Primary motor area	claustrum	36	0.710471464511884
LatentSpace_v13	Primary motor area	temporal pole	37	0.6463772827100961
LatentSpace_v13	Primary motor area	parolfactory gyri	38	0.5692294430392404
LatentSpace_v13	Primary motor area	parahippocampal gyrus	39	0.5473424976108094
LatentSpace_v13	Primary motor area	dentate gyrus	40	0.42199440109624126
LatentSpace_v13	Primary motor area	vermal VIIAt	41	0.4152437617973052
LatentSpace_v13	Primary motor area	IX	42	0.41255510837933806
LatentSpace_v13	Primary motor area	vermal V	43	0.41087381812451695
LatentSpace_v13	Primary motor area	VIIIA	44	0.40737337377077676
LatentSpace_v13	Primary motor area	crus II	45	0.4021148961381127
LatentSpace_v13	Primary motor area	V	46	0.3926798585608057
LatentSpace_v13	Primary motor area	VI	47	0.38839723877974947
LatentSpace_v13	Primary motor area	crus I	48	0.38646522116710735
LatentSpace_v13	Primary motor area	vermal VIIAf	49	0.38551159114626576
LatentSpace_v13	Primary motor area	VIIB	50	0.38420363076757436
LatentSpace_v13	Primary motor area	vermal VIIIA	51	0.37921583714307344
LatentSpace_v13	Primary motor area	IV	52	0.3771073759068349
LatentSpace_v13	Primary motor area	vermal IV	53	0.3561403533008749
LatentSpace_v13	Primary motor area	CA1 field	54	0.3531870623640893
LatentSpace_v13	Primary motor area	vermal IX	55	0.3516330407402954
LatentSpace_v13	Primary motor area	VIIIB	56	0.3489703336960648
LatentSpace_v13	Primary motor area	vermal VIIB	57	0.34646394508312617
LatentSpace_v13	Primary motor area	III	58	0.34160813957496855
LatentSpace_v13	Primary motor area	vermal III	59	0.33648212334662897
LatentSpace_v13	Primary motor area	CA3 field	60	0.3326424785146645
LatentSpace_v13	Primary motor area	CA2 field	61	0.32499428634219973
LatentSpace_v13	Primary motor area	vermal VI	62	0.3139438695225778
LatentSpace_v13	Primary motor area	subiculum	63	0.305484134363104
LatentSpace_v13	Primary motor area	X	64	0.2978379993093444
LatentSpace_v13	Primary motor area	vermal VIIIB	65	0.2909268418380824
LatentSpace_v13	Primary motor area	paraterminal gyrus	66	0.2577235827477358
LatentSpace_v13	Primary motor area	thalamus	67	0.22580764281705185
LatentSpace_v13	Primary motor area	vermal I-II	68	0.20832851249713402
LatentSpace_v13	Primary motor area	CA4 field	69	0.1967306083249023
LatentSpace_v13	Primary motor area	cerebellar nuclei	70	0.1785987398987644
LatentSpace_v13	Primary motor area	putamen	71	0.17705664143932417
LatentSpace_v13	Primary motor area	subthalamus	72	0.17155677531899421
LatentSpace_v13	Primary motor area	caudate nucleus	73	0.16523446439745254
LatentSpace_v13	Primary motor area	piriform cortex	74	0.1487690300814986
LatentSpace_v13	Primary motor area	vermal X	75	0.14809622932835947
LatentSpace_v13	Primary motor area	superior colliculus	76	0.14128900152376486
LatentSpace_v13	Primary motor area	pons	77	0.13375341061525875
LatentSpace_v13	Primary motor area	globus pallidus	78	0.1333672789124936
LatentSpace_v13	Primary motor area	inferior colliculus	79	0.131167629403638
LatentSpace_v13	Primary motor area	myelencephalon	80	0.11943599781559992
LatentSpace_v13	Primary motor area	pretectal region	81	0.1065453036326052
LatentSpace_v13	Primary motor area	midbrain tegmentum	82	0.10617927165388925
LatentSpace_v13	Primary motor area	nucleus accumbens	83	0.07350479154274371
LatentSpace_v13	Primary motor area	epithalamus	84	0.0518109251774327
LatentSpace_v13	Primary motor area	hypothalamus	85	0.03563362262914039
LatentSpace_v13	Primary motor area	substantia innominata	86	0.03188465406108462
LatentSpace_v13	Primary motor area	amygdala	87	0.018439847095343204
LatentSpace_v13	Primary motor area	septal nuclei	88	0
LatentSpace_v14	Primary motor area	paracentral lobule, anterior part	1	1
LatentSpace_v14	Primary motor area	middle frontal gyrus	2	0.9995230303773984
LatentSpace_v14	Primary motor area	superior frontal gyrus	3	0.9952577350207661
LatentSpace_v14	Primary motor area	inferior frontal gyrus	4	0.9931112869539662
LatentSpace_v14	Primary motor area	precentral gyrus	5	0.9908556036222066
LatentSpace_v14	Primary motor area	inferior parietal lobule	6	0.987441755139202
LatentSpace_v14	Primary motor area	precuneus	7	0.9827123173745471
LatentSpace_v14	Primary motor area	superior temporal gyrus	8	0.9814141944456037
LatentSpace_v14	Primary motor area	occipito-temporal gyrus	9	0.9784747275641873
LatentSpace_v14	Primary motor area	superior parietal lobule	10	0.9709419067419461
LatentSpace_v14	Primary motor area	middle temporal gyrus	11	0.9689191467655457
LatentSpace_v14	Primary motor area	Heschl's gyrus	12	0.9681796612394321
LatentSpace_v14	Primary motor area	transverse gyri	13	0.9672637391126141
LatentSpace_v14	Primary motor area	paracentral lobule, posterior part	14	0.9617765394013978
LatentSpace_v14	Primary motor area	frontal pole	15	0.9612586931648103
LatentSpace_v14	Primary motor area	planum temporale	16	0.9596541979120692
LatentSpace_v14	Primary motor area	anterior orbital gyrus	17	0.9594663985770077
LatentSpace_v14	Primary motor area	lateral orbital gyrus	18	0.957564157086696
LatentSpace_v14	Primary motor area	postcentral gyrus	19	0.9560327429695221
LatentSpace_v14	Primary motor area	inferior occipital gyrus	20	0.9513283379033846
LatentSpace_v14	Primary motor area	superior occipital gyrus	21	0.9505154392041933
LatentSpace_v14	Primary motor area	posterior orbital gyrus	22	0.9454406472843108
LatentSpace_v14	Primary motor area	frontal operculum	23	0.9445289903235036
LatentSpace_v14	Primary motor area	inferior temporal gyrus	24	0.9344876906004363
LatentSpace_v14	Primary motor area	cingulate gyrus	25	0.9324382826500536
LatentSpace_v14	Primary motor area	superior rostral gyrus	26	0.928746706663813
LatentSpace_v14	Primary motor area	medial orbital gyrus	27	0.9204499300165451
LatentSpace_v14	Primary motor area	planum polare	28	0.9146240465764442
LatentSpace_v14	Primary motor area	occipital pole	29	0.899871974083862
LatentSpace_v14	Primary motor area	gyrus rectus	30	0.8913239912304588
LatentSpace_v14	Primary motor area	cuneus	31	0.8891670677777583
LatentSpace_v14	Primary motor area	inferior rostral gyrus	32	0.8874550290462192
LatentSpace_v14	Primary motor area	fusiform gyrus	33	0.8832031037058945
LatentSpace_v14	Primary motor area	lingual gyrus	34	0.8830421385214988
LatentSpace_v14	Primary motor area	insula	35	0.8780604655477899
LatentSpace_v14	Primary motor area	temporal pole	36	0.7458608991365487
LatentSpace_v14	Primary motor area	claustrum	37	0.6941188680590834
LatentSpace_v14	Primary motor area	parolfactory gyri	38	0.6644313998780162
LatentSpace_v14	Primary motor area	parahippocampal gyrus	39	0.6408790997245262
LatentSpace_v14	Primary motor area	dentate gyrus	40	0.6276085464191709
LatentSpace_v14	Primary motor area	CA2 field	41	0.5066768267268604
LatentSpace_v14	Primary motor area	CA3 field	42	0.5028878098445981
LatentSpace_v14	Primary motor area	CA1 field	43	0.4491702368825213
LatentSpace_v14	Primary motor area	vermal V	44	0.344420805091335
LatentSpace_v14	Primary motor area	III	45	0.34343301719598324
LatentSpace_v14	Primary motor area	subiculum	46	0.3432804267827369
LatentSpace_v14	Primary motor area	globus pallidus	47	0.33780371702650064
LatentSpace_v14	Primary motor area	vermal III	48	0.3361766014864851
LatentSpace_v14	Primary motor area	IV	49	0.33532566852543644
LatentSpace_v14	Primary motor area	vermal VIIIA	50	0.3326856824081287
LatentSpace_v14	Primary motor area	V	51	0.3320630085455625
LatentSpace_v14	Primary motor area	VIIIA	52	0.3317881264963965
LatentSpace_v14	Primary motor area	vermal IV	53	0.32770318013951205
LatentSpace_v14	Primary motor area	IX	54	0.32761018993858576
LatentSpace_v14	Primary motor area	vermal VIIAt	55	0.3263100569929229
LatentSpace_v14	Primary motor area	vermal VIIAf	56	0.32507460082635764
LatentSpace_v14	Primary motor area	VI	57	0.323682159722372
LatentSpace_v14	Primary motor area	inferior colliculus	58	0.32157564143063677
LatentSpace_v14	Primary motor area	crus II	59	0.3212797989510798
LatentSpace_v14	Primary motor area	VIIB	60	0.32105152030177875
LatentSpace_v14	Primary motor area	CA4 field	61	0.31979615472157885
LatentSpace_v14	Primary motor area	vermal VIIB	62	0.3172335998517723
LatentSpace_v14	Primary motor area	thalamus	63	0.3134261613068156
LatentSpace_v14	Primary motor area	VIIIB	64	0.3091129616637897
LatentSpace_v14	Primary motor area	X	65	0.30891633460263285
LatentSpace_v14	Primary motor area	crus I	66	0.30619000624524184
LatentSpace_v14	Primary motor area	vermal VIIIB	67	0.30242906195328745
LatentSpace_v14	Primary motor area	cerebellar nuclei	68	0.3017277674157505
LatentSpace_v14	Primary motor area	vermal I-II	69	0.3010970057726042
LatentSpace_v14	Primary motor area	vermal IX	70	0.29276152216266704
LatentSpace_v14	Primary motor area	vermal VI	71	0.2923894442810234
LatentSpace_v14	Primary motor area	paraterminal gyrus	72	0.286302788903163
LatentSpace_v14	Primary motor area	myelencephalon	73	0.281948664216321
LatentSpace_v14	Primary motor area	pons	74	0.27782201864605677
LatentSpace_v14	Primary motor area	superior colliculus	75	0.27639828147907397
LatentSpace_v14	Primary motor area	subthalamus	76	0.2761471823923699
LatentSpace_v14	Primary motor area	pretectal region	77	0.26815699571193197
LatentSpace_v14	Primary motor area	midbrain tegmentum	78	0.24052777794153157
LatentSpace_v14	Primary motor area	vermal X	79	0.216972859393066
LatentSpace_v14	Primary motor area	epithalamus	80	0.17769770805539026
LatentSpace_v14	Primary motor area	putamen	81	0.1634309752587184
LatentSpace_v14	Primary motor area	caudate nucleus	82	0.16227721053317104
LatentSpace_v14	Primary motor area	piriform cortex	83	0.12245296884508663
LatentSpace_v14	Primary motor area	nucleus accumbens	84	0.07772600024254749
LatentSpace_v14	Primary motor area	hypothalamus	85	0.0750416705465391
LatentSpace_v14	Primary motor area	substantia innominata	86	0.027149719933309197
LatentSpace_v14	Primary motor area	amygdala	87	0.004883947164798524
LatentSpace_v14	Primary motor area	septal nuclei	88	0
LatentSpace_v15	Primary motor area	paracentral lobule, anterior part	1	1
LatentSpace_v15	Primary motor area	middle frontal gyrus	2	0.9922092099752132
LatentSpace_v15	Primary motor area	inferior frontal gyrus	3	0.9915491438118439
LatentSpace_v15	Primary motor area	precentral gyrus	4	0.9892222084001356
LatentSpace_v15	Primary motor area	inferior parietal lobule	5	0.9831504617557165
LatentSpace_v15	Primary motor area	superior frontal gyrus	6	0.9820058344550928
LatentSpace_v15	Primary motor area	precuneus	7	0.9819403146486096
LatentSpace_v15	Primary motor area	superior parietal lobule	8	0.9796405073971722
LatentSpace_v15	Primary motor area	paracentral lobule, posterior part	9	0.9777267515375536
LatentSpace_v15	Primary motor area	occipito-temporal gyrus	10	0.9771332109393518
LatentSpace_v15	Primary motor area	superior temporal gyrus	11	0.9739444120356084
LatentSpace_v15	Primary motor area	transverse gyri	12	0.9710460353962018
LatentSpace_v15	Primary motor area	planum temporale	13	0.9648596972990471
LatentSpace_v15	Primary motor area	Heschl's gyrus	14	0.9631857963150412
LatentSpace_v15	Primary motor area	inferior occipital gyrus	15	0.9617719321732173
LatentSpace_v15	Primary motor area	superior occipital gyrus	16	0.9582728647960777
LatentSpace_v15	Primary motor area	postcentral gyrus	17	0.9581367612038814
LatentSpace_v15	Primary motor area	middle temporal gyrus	18	0.957595776419118
LatentSpace_v15	Primary motor area	frontal pole	19	0.9525926062212406
LatentSpace_v15	Primary motor area	lateral orbital gyrus	20	0.9488745653283778
LatentSpace_v15	Primary motor area	anterior orbital gyrus	21	0.9354091853147173
LatentSpace_v15	Primary motor area	frontal operculum	22	0.9319291138137877
LatentSpace_v15	Primary motor area	posterior orbital gyrus	23	0.9298188060900032
LatentSpace_v15	Primary motor area	occipital pole	24	0.9282493593703054
LatentSpace_v15	Primary motor area	cuneus	25	0.9121043573384713
LatentSpace_v15	Primary motor area	cingulate gyrus	26	0.9115730176594506
LatentSpace_v15	Primary motor area	lingual gyrus	27	0.911092820536733
LatentSpace_v15	Primary motor area	inferior temporal gyrus	28	0.9064470440088116
LatentSpace_v15	Primary motor area	planum polare	29	0.8962857861890273
LatentSpace_v15	Primary motor area	superior rostral gyrus	30	0.8939758307347728
LatentSpace_v15	Primary motor area	medial orbital gyrus	31	0.8882891241975314
LatentSpace_v15	Primary motor area	insula	32	0.8490037425021619
LatentSpace_v15	Primary motor area	gyrus rectus	33	0.848130795607308
LatentSpace_v15	Primary motor area	inferior rostral gyrus	34	0.8436132484867663
LatentSpace_v15	Primary motor area	fusiform gyrus	35	0.839897315811008
LatentSpace_v15	Primary motor area	claustrum	36	0.6727788709760169
LatentSpace_v15	Primary motor area	temporal pole	37	0.6716471088322032
LatentSpace_v15	Primary motor area	parolfactory gyri	38	0.5847010138767852
LatentSpace_v15	Primary motor area	parahippocampal gyrus	39	0.5525155354333842
LatentSpace_v15	Primary motor area	dentate gyrus	40	0.4865685584759776
LatentSpace_v15	Primary motor area	CA3 field	41	0.3764745833144733
LatentSpace_v15	Primary motor area	CA1 field	42	0.3693026547930703
LatentSpace_v15	Primary motor area	paraterminal gyrus	43	0.3511931381887406
LatentSpace_v15	Primary motor area	CA2 field	44	0.34768044502006606
LatentSpace_v15	Primary motor area	vermal V	45	0.3380708238040411
LatentSpace_v15	Primary motor area	vermal VIIAt	46	0.3188257622416053
LatentSpace_v15	Primary motor area	VIIIA	47	0.3176114445965753
LatentSpace_v15	Primary motor area	vermal IV	48	0.31741037990201076
LatentSpace_v15	Primary motor area	V	49	0.31580769344161613
LatentSpace_v15	Primary motor area	crus II	50	0.3150252818467625
LatentSpace_v15	Primary motor area	VI	51	0.3145830275630054
LatentSpace_v15	Primary motor area	subiculum	52	0.3134362537281474
LatentSpace_v15	Primary motor area	VIIB	53	0.3114704776733143
LatentSpace_v15	Primary motor area	vermal VIIB	54	0.31054882904801556
LatentSpace_v15	Primary motor area	vermal VIIIA	55	0.3102634390578779
LatentSpace_v15	Primary motor area	vermal III	56	0.31010414501568484
LatentSpace_v15	Primary motor area	IX	57	0.31000112618899506
LatentSpace_v15	Primary motor area	vermal VIIAf	58	0.3078081843442908
LatentSpace_v15	Primary motor area	IV	59	0.30542453207594084
LatentSpace_v15	Primary motor area	crus I	60	0.30536557474381726
LatentSpace_v15	Primary motor area	vermal IX	61	0.30147858794656973
LatentSpace_v15	Primary motor area	X	62	0.2968647336061226
LatentSpace_v15	Primary motor area	III	63	0.2953148602753294
LatentSpace_v15	Primary motor area	VIIIB	64	0.29046228251361894
LatentSpace_v15	Primary motor area	vermal VIIIB	65	0.28961168887251093
LatentSpace_v15	Primary motor area	vermal VI	66	0.28323423305333645
LatentSpace_v15	Primary motor area	vermal I-II	67	0.2754724169952245
LatentSpace_v15	Primary motor area	caudate nucleus	68	0.26358911242221666
LatentSpace_v15	Primary motor area	putamen	69	0.25559219201257405
LatentSpace_v15	Primary motor area	vermal X	70	0.23896618118475574
LatentSpace_v15	Primary motor area	thalamus	71	0.2328935091854771
LatentSpace_v15	Primary motor area	cerebellar nuclei	72	0.19652084763936212
LatentSpace_v15	Primary motor area	myelencephalon	73	0.19575301273566031
LatentSpace_v15	Primary motor area	pons	74	0.19517558009875993
LatentSpace_v15	Primary motor area	CA4 field	75	0.1870305091125563
LatentSpace_v15	Primary motor area	globus pallidus	76	0.18534833336599382
LatentSpace_v15	Primary motor area	inferior colliculus	77	0.16404830824182123
LatentSpace_v15	Primary motor area	subthalamus	78	0.16159447897402673
LatentSpace_v15	Primary motor area	nucleus accumbens	79	0.15167337199295722
LatentSpace_v15	Primary motor area	midbrain tegmentum	80	0.13890205739390557
LatentSpace_v15	Primary motor area	epithalamus	81	0.12774831521645216
LatentSpace_v15	Primary motor area	piriform cortex	82	0.1269595349075796
LatentSpace_v15	Primary motor area	pretectal region	83	0.11392169268281922
LatentSpace_v15	Primary motor area	superior colliculus	84	0.11259253154669867
LatentSpace_v15	Primary motor area	hypothalamus	85	0.09053654683545397
LatentSpace_v15	Primary motor area	substantia innominata	86	0.05424626001861944
LatentSpace_v15	Primary motor area	amygdala	87	0.027995443966851028
LatentSpace_v15	Primary motor area	septal nuclei	88	0
LatentSpace_v16	Primary motor area	paracentral lobule, anterior part	1	1
LatentSpace_v16	Primary motor area	precentral gyrus	2	0.9856506367677513
LatentSpace_v16	Primary motor area	occipito-temporal gyrus	3	0.9842705572588473
LatentSpace_v16	Primary motor area	precuneus	4	0.9825937115632458
LatentSpace_v16	Primary motor area	inferior parietal lobule	5	0.9803835886586282
LatentSpace_v16	Primary motor area	middle frontal gyrus	6	0.9767038584270973
LatentSpace_v16	Primary motor area	inferior frontal gyrus	7	0.9759126817518586
LatentSpace_v16	Primary motor area	superior parietal lobule	8	0.9738555830802669
LatentSpace_v16	Primary motor area	Heschl's gyrus	9	0.9704488591951075
LatentSpace_v16	Primary motor area	transverse gyri	10	0.9695672359884902
LatentSpace_v16	Primary motor area	superior temporal gyrus	11	0.9660131255238704
LatentSpace_v16	Primary motor area	superior frontal gyrus	12	0.9644492973982816
LatentSpace_v16	Primary motor area	inferior occipital gyrus	13	0.9614559126451411
LatentSpace_v16	Primary motor area	postcentral gyrus	14	0.9611634208465335
LatentSpace_v16	Primary motor area	paracentral lobule, posterior part	15	0.9601084693157502
LatentSpace_v16	Primary motor area	superior occipital gyrus	16	0.9590211693915426
LatentSpace_v16	Primary motor area	planum temporale	17	0.9561555476104104
LatentSpace_v16	Primary motor area	middle temporal gyrus	18	0.9507170732116391
LatentSpace_v16	Primary motor area	lateral orbital gyrus	19	0.9370513590534086
LatentSpace_v16	Primary motor area	frontal pole	20	0.936083407073081
LatentSpace_v16	Primary motor area	occipital pole	21	0.9222361458930437
LatentSpace_v16	Primary motor area	anterior orbital gyrus	22	0.9172461273790645
LatentSpace_v16	Primary motor area	posterior orbital gyrus	23	0.9162277702407232
LatentSpace_v16	Primary motor area	frontal operculum	24	0.9079730339777665
LatentSpace_v16	Primary motor area	cuneus	25	0.9001633485221103
LatentSpace_v16	Primary motor area	lingual gyrus	26	0.8962534418270227
LatentSpace_v16	Primary motor area	cingulate gyrus	27	0.8954078402282197
LatentSpace_v16	Primary motor area	inferior temporal gyrus	28	0.8904506532514871
LatentSpace_v16	Primary motor area	planum polare	29	0.8784472189838731
LatentSpace_v16	Primary motor area	medial orbital gyrus	30	0.8583628496696036
LatentSpace_v16	Primary motor area	superior rostral gyrus	31	0.8583314638013427
LatentSpace_v16	Primary motor area	insula	32	0.816007037426661
LatentSpace_v16	Primary motor area	gyrus rectus	33	0.8085934894006254
LatentSpace_v16	Primary motor area	fusiform gyrus	34	0.8051777870735055
LatentSpace_v16	Primary motor area	inferior rostral gyrus	35	0.7973996474065426
LatentSpace_v16	Primary motor area	claustrum	36	0.7058763136496677
LatentSpace_v16	Primary motor area	temporal pole	37	0.6236165828961763
LatentSpace_v16	Primary motor area	parolfactory gyri	38	0.5422936531111986
LatentSpace_v16	Primary motor area	parahippocampal gyrus	39	0.5246631228428217
LatentSpace_v16	Primary motor area	dentate gyrus	40	0.47152188890110336
LatentSpace_v16	Primary motor area	IX	41	0.45974436757811366
LatentSpace_v16	Primary motor area	vermal V	42	0.44589930377617454
LatentSpace_v16	Primary motor area	crus II	43	0.4444811827827991
LatentSpace_v16	Primary motor area	VIIIA	44	0.44367137700338544
LatentSpace_v16	Primary motor area	VIIB	45	0.4349153741779477
LatentSpace_v16	Primary motor area	vermal VIIAf	46	0.4342658784298652
LatentSpace_v16	Primary motor area	VI	47	0.43324440068979103
LatentSpace_v16	Primary motor area	V	48	0.4331879861520225
LatentSpace_v16	Primary motor area	vermal VIIAt	49	0.4326861220277115
LatentSpace_v16	Primary motor area	crus I	50	0.43075749358567167
LatentSpace_v16	Primary motor area	vermal VIIB	51	0.42714171274080887
LatentSpace_v16	Primary motor area	VIIIB	52	0.42516507493641154
LatentSpace_v16	Primary motor area	IV	53	0.42429002233914864
LatentSpace_v16	Primary motor area	vermal VIIIA	54	0.4235234020167964
LatentSpace_v16	Primary motor area	III	55	0.4222565983636051
LatentSpace_v16	Primary motor area	vermal IX	56	0.42044386661721306
LatentSpace_v16	Primary motor area	vermal IV	57	0.4190076830088146
LatentSpace_v16	Primary motor area	vermal III	58	0.4108057328630127
LatentSpace_v16	Primary motor area	vermal VI	59	0.4071881642686319
LatentSpace_v16	Primary motor area	vermal VIIIB	60	0.40577577093253075
LatentSpace_v16	Primary motor area	vermal I-II	61	0.396199998937285
LatentSpace_v16	Primary motor area	X	62	0.3823299695477844
LatentSpace_v16	Primary motor area	globus pallidus	63	0.3820951490763803
LatentSpace_v16	Primary motor area	CA1 field	64	0.3818880617713308
LatentSpace_v16	Primary motor area	thalamus	65	0.38007784164071967
LatentSpace_v16	Primary motor area	CA3 field	66	0.3689228932249807
LatentSpace_v16	Primary motor area	cerebellar nuclei	67	0.3656789346203217
LatentSpace_v16	Primary motor area	CA2 field	68	0.3634525590547518
LatentSpace_v16	Primary motor area	subthalamus	69	0.34923305476038025
LatentSpace_v16	Primary motor area	inferior colliculus	70	0.33108802692066874
LatentSpace_v16	Primary motor area	vermal X	71	0.31909807670701124
LatentSpace_v16	Primary motor area	myelencephalon	72	0.30336305623221027
LatentSpace_v16	Primary motor area	subiculum	73	0.2984594382142939
LatentSpace_v16	Primary motor area	putamen	74	0.2913475110512498
LatentSpace_v16	Primary motor area	pons	75	0.28361823513309314
LatentSpace_v16	Primary motor area	pretectal region	76	0.2810256715572664
LatentSpace_v16	Primary motor area	paraterminal gyrus	77	0.27490255892458637
LatentSpace_v16	Primary motor area	caudate nucleus	78	0.2682057950421997
LatentSpace_v16	Primary motor area	superior colliculus	79	0.26100790096127985
LatentSpace_v16	Primary motor area	midbrain tegmentum	80	0.258496155033711
LatentSpace_v16	Primary motor area	epithalamus	81	0.2522285561988656
LatentSpace_v16	Primary motor area	CA4 field	82	0.22414004601165374
LatentSpace_v16	Primary motor area	nucleus accumbens	83	0.15645086876218747
LatentSpace_v16	Primary motor area	substantia innominata	84	0.13686285541046672
LatentSpace_v16	Primary motor area	septal nuclei	85	0.13120152659254922
LatentSpace_v16	Primary motor area	hypothalamus	86	0.11708376956911468
LatentSpace_v16	Primary motor area	piriform cortex	87	0.09566074458135035
LatentSpace_v16	Primary motor area	amygdala	88	0
LatentSpace_v17	Primary motor area	paracentral lobule, anterior part	1	1
LatentSpace_v17	Primary motor area	precentral gyrus	2	0.9864135907458806
LatentSpace_v17	Primary motor area	occipito-temporal gyrus	3	0.9766641416314095
LatentSpace_v17	Primary motor area	Heschl's gyrus	4	0.9764868695371904
LatentSpace_v17	Primary motor area	precuneus	5	0.9744227862028876
LatentSpace_v17	Primary motor area	inferior parietal lobule	6	0.9718866936319517
LatentSpace_v17	Primary motor area	inferior occipital gyrus	7	0.9718086387647626
LatentSpace_v17	Primary motor area	superior parietal lobule	8	0.9715266828590656
LatentSpace_v17	Primary motor area	transverse gyri	9	0.971347426221179
LatentSpace_v17	Primary motor area	superior occipital gyrus	10	0.9687320496518804
LatentSpace_v17	Primary motor area	paracentral lobule, posterior part	11	0.9677568762103704
LatentSpace_v17	Primary motor area	postcentral gyrus	12	0.9637133403809692
LatentSpace_v17	Primary motor area	inferior frontal gyrus	13	0.9529533190907189
LatentSpace_v17	Primary motor area	planum temporale	14	0.9482790224334416
LatentSpace_v17	Primary motor area	middle frontal gyrus	15	0.9468169293953534
LatentSpace_v17	Primary motor area	superior temporal gyrus	16	0.9419056692247446
LatentSpace_v17	Primary motor area	occipital pole	17	0.9373943902728312
LatentSpace_v17	Primary motor area	superior frontal gyrus	18	0.9260865424473218
LatentSpace_v17	Primary motor area	middle temporal gyrus	19	0.9236130545234514
LatentSpace_v17	Primary motor area	cuneus	20	0.9144988809239337
LatentSpace_v17	Primary motor area	lingual gyrus	21	0.9096577286788298
LatentSpace_v17	Primary motor area	frontal pole	22	0.9022743656003596
LatentSpace_v17	Primary motor area	lateral orbital gyrus	23	0.9021021327510325
LatentSpace_v17	Primary motor area	posterior orbital gyrus	24	0.8714034863750282
LatentSpace_v17	Primary motor area	anterior orbital gyrus	25	0.8694355234999468
LatentSpace_v17	Primary motor area	frontal operculum	26	0.8558224196265365
LatentSpace_v17	Primary motor area	cingulate gyrus	27	0.8471485351454858
LatentSpace_v17	Primary motor area	inferior temporal gyrus	28	0.8469674759847114
LatentSpace_v17	Primary motor area	planum polare	29	0.8435774848620994
LatentSpace_v17	Primary motor area	superior rostral gyrus	30	0.8194774126133278
LatentSpace_v17	Primary motor area	medial orbital gyrus	31	0.8008582794545587
LatentSpace_v17	Primary motor area	insula	32	0.7676337914566783
LatentSpace_v17	Primary motor area	gyrus rectus	33	0.7647727519101558
LatentSpace_v17	Primary motor area	fusiform gyrus	34	0.7578450294937404
LatentSpace_v17	Primary motor area	inferior rostral gyrus	35	0.7552410059450801
LatentSpace_v17	Primary motor area	claustrum	36	0.627958122497391
LatentSpace_v17	Primary motor area	dentate gyrus	37	0.6025391466385762
LatentSpace_v17	Primary motor area	temporal pole	38	0.564953224609038
LatentSpace_v17	Primary motor area	parolfactory gyri	39	0.4990790434008846
LatentSpace_v17	Primary motor area	parahippocampal gyrus	40	0.47483261827843337
LatentSpace_v17	Primary motor area	thalamus	41	0.3924522569646367
LatentSpace_v17	Primary motor area	putamen	42	0.37866738747622986
LatentSpace_v17	Primary motor area	caudate nucleus	43	0.37223255818627315
LatentSpace_v17	Primary motor area	inferior colliculus	44	0.36790397349606785
LatentSpace_v17	Primary motor area	superior colliculus	45	0.3590406561887497
LatentSpace_v17	Primary motor area	cerebellar nuclei	46	0.3563989398260412
LatentSpace_v17	Primary motor area	CA1 field	47	0.3473070868790244
LatentSpace_v17	Primary motor area	subthalamus	48	0.33926330250937486
LatentSpace_v17	Primary motor area	paraterminal gyrus	49	0.3389255179283967
LatentSpace_v17	Primary motor area	globus pallidus	50	0.3291974470211565
LatentSpace_v17	Primary motor area	pretectal region	51	0.32765710853992797
LatentSpace_v17	Primary motor area	pons	52	0.3182627675884319
LatentSpace_v17	Primary motor area	myelencephalon	53	0.31748758137268335
LatentSpace_v17	Primary motor area	CA3 field	54	0.31045841406420865
LatentSpace_v17	Primary motor area	nucleus accumbens	55	0.2982570591205269
LatentSpace_v17	Primary motor area	midbrain tegmentum	56	0.29682737377509655
LatentSpace_v17	Primary motor area	CA2 field	57	0.2847814591067996
LatentSpace_v17	Primary motor area	vermal I-II	58	0.2705308464300438
LatentSpace_v17	Primary motor area	vermal X	59	0.25630728152777377
LatentSpace_v17	Primary motor area	epithalamus	60	0.25371496296392215
LatentSpace_v17	Primary motor area	vermal VIIB	61	0.24518739204937456
LatentSpace_v17	Primary motor area	vermal III	62	0.23767059078336938
LatentSpace_v17	Primary motor area	III	63	0.23309040822023033
LatentSpace_v17	Primary motor area	X	64	0.23251656623694802
LatentSpace_v17	Primary motor area	vermal IX	65	0.232427124957753
LatentSpace_v17	Primary motor area	crus I	66	0.22841211310336512
LatentSpace_v17	Primary motor area	vermal VIIIB	67	0.22782620070348655
LatentSpace_v17	Primary motor area	V	68	0.2273356366579137
LatentSpace_v17	Primary motor area	IV	69	0.22680005961719488
LatentSpace_v17	Primary motor area	crus II	70	0.22500355892095628
LatentSpace_v17	Primary motor area	vermal IV	71	0.2249990913278461
LatentSpace_v17	Primary motor area	vermal VIIAf	72	0.2249073585338919
LatentSpace_v17	Primary motor area	VIIB	73	0.22488278705342812
LatentSpace_v17	Primary motor area	vermal V	74	0.22371845702395138
LatentSpace_v17	Primary motor area	substantia innominata	75	0.22353774692638262
LatentSpace_v17	Primary motor area	vermal VIIIA	76	0.22238580540589703
LatentSpace_v17	Primary motor area	VI	77	0.22233563095414285
LatentSpace_v17	Primary motor area	VIIIA	78	0.2204197654542769
LatentSpace_v17	Primary motor area	vermal VIIAt	79	0.21964282503877425
LatentSpace_v17	Primary motor area	IX	80	0.21852167069761763
LatentSpace_v17	Primary motor area	vermal VI	81	0.21391906789440324
LatentSpace_v17	Primary motor area	subiculum	82	0.2118242577758502
LatentSpace_v17	Primary motor area	VIIIB	83	0.2096326752021894
LatentSpace_v17	Primary motor area	septal nuclei	84	0.19620599496341654
LatentSpace_v17	Primary motor area	hypothalamus	85	0.17570142432692543
LatentSpace_v17	Primary motor area	CA4 field	86	0.1409018735162279
LatentSpace_v17	Primary motor area	amygdala	87	0.010752854062710612
LatentSpace_v17	Primary motor area	piriform cortex	88	0
LatentSpace_v18	Primary motor area	paracentral lobule, anterior part	1	1
LatentSpace_v18	Primary motor area	precentral gyrus	2	0.9909008736444211
LatentSpace_v18	Primary motor area	occipito-temporal gyrus	3	0.9748166773294575
LatentSpace_v18	Primary motor area	superior parietal lobule	4	0.9729678657229719
LatentSpace_v18	Primary motor area	precuneus	5	0.9724664432380468
LatentSpace_v18	Primary motor area	middle frontal gyrus	6	0.9723391846605163
LatentSpace_v18	Primary motor area	inferior frontal gyrus	7	0.9712939363824666
LatentSpace_v18	Primary motor area	inferior parietal lobule	8	0.9704249513801683
LatentSpace_v18	Primary motor area	paracentral lobule, posterior part	9	0.9677598667937675
LatentSpace_v18	Primary motor area	inferior occipital gyrus	10	0.966657693501166
LatentSpace_v18	Primary motor area	Heschl's gyrus	11	0.9662033402899103
LatentSpace_v18	Primary motor area	superior occipital gyrus	12	0.965018281973418
LatentSpace_v18	Primary motor area	transverse gyri	13	0.9633665008193594
LatentSpace_v18	Primary motor area	postcentral gyrus	14	0.9627279979137412
LatentSpace_v18	Primary motor area	superior frontal gyrus	15	0.9600763009177954
LatentSpace_v18	Primary motor area	superior temporal gyrus	16	0.9578291319296742
LatentSpace_v18	Primary motor area	planum temporale	17	0.9493359286263596
LatentSpace_v18	Primary motor area	middle temporal gyrus	18	0.9436703768240227
LatentSpace_v18	Primary motor area	frontal pole	19	0.9343637604632712
LatentSpace_v18	Primary motor area	lateral orbital gyrus	20	0.933496682957596
LatentSpace_v18	Primary motor area	occipital pole	21	0.932565715049037
LatentSpace_v18	Primary motor area	posterior orbital gyrus	22	0.9257340372675824
LatentSpace_v18	Primary motor area	cuneus	23	0.9210734991175491
LatentSpace_v18	Primary motor area	lingual gyrus	24	0.9179586484601596
LatentSpace_v18	Primary motor area	anterior orbital gyrus	25	0.9138987311276389
LatentSpace_v18	Primary motor area	frontal operculum	26	0.9103965184477143
LatentSpace_v18	Primary motor area	cingulate gyrus	27	0.8942239314512399
LatentSpace_v18	Primary motor area	inferior temporal gyrus	28	0.891285711466653
LatentSpace_v18	Primary motor area	planum polare	29	0.8797140400586836
LatentSpace_v18	Primary motor area	superior rostral gyrus	30	0.8731010640290169
LatentSpace_v18	Primary motor area	medial orbital gyrus	31	0.8718914079505142
LatentSpace_v18	Primary motor area	gyrus rectus	32	0.8336432206210804
LatentSpace_v18	Primary motor area	insula	33	0.8284534344345755
LatentSpace_v18	Primary motor area	fusiform gyrus	34	0.8211793547897892
LatentSpace_v18	Primary motor area	inferior rostral gyrus	35	0.8178471646002649
LatentSpace_v18	Primary motor area	claustrum	36	0.7179393820855348
LatentSpace_v18	Primary motor area	temporal pole	37	0.6629557829965127
LatentSpace_v18	Primary motor area	parahippocampal gyrus	38	0.6062354066119715
LatentSpace_v18	Primary motor area	parolfactory gyri	39	0.5926703073754479
LatentSpace_v18	Primary motor area	vermal VIIB	40	0.48760979664266507
LatentSpace_v18	Primary motor area	vermal V	41	0.4855101379694897
LatentSpace_v18	Primary motor area	vermal IX	42	0.4791290067925724
LatentSpace_v18	Primary motor area	VIIIA	43	0.4791079223248252
LatentSpace_v18	Primary motor area	vermal VIIIA	44	0.47845370569747625
LatentSpace_v18	Primary motor area	vermal VIIAf	45	0.4762949430645574
LatentSpace_v18	Primary motor area	crus II	46	0.47493277775759607
LatentSpace_v18	Primary motor area	VIIB	47	0.47236254314685244
LatentSpace_v18	Primary motor area	crus I	48	0.4718401719266716
LatentSpace_v18	Primary motor area	vermal VIIAt	49	0.47066800711852946
LatentSpace_v18	Primary motor area	VI	50	0.47019532153656646
LatentSpace_v18	Primary motor area	vermal IV	51	0.4695886487554042
LatentSpace_v18	Primary motor area	vermal VIIIB	52	0.46917054905403865
LatentSpace_v18	Primary motor area	vermal III	53	0.4680477148365979
LatentSpace_v18	Primary motor area	V	54	0.46767855990238894
LatentSpace_v18	Primary motor area	IX	55	0.46656875791304264
LatentSpace_v18	Primary motor area	dentate gyrus	56	0.4608962529995467
LatentSpace_v18	Primary motor area	X	57	0.45084356038659684
LatentSpace_v18	Primary motor area	IV	58	0.4482752718100791
LatentSpace_v18	Primary motor area	vermal I-II	59	0.44626478279226556
LatentSpace_v18	Primary motor area	vermal X	60	0.4413152646769604
LatentSpace_v18	Primary motor area	VIIIB	61	0.4408424366787912
LatentSpace_v18	Primary motor area	III	62	0.43948185180059207
LatentSpace_v18	Primary motor area	vermal VI	63	0.43630272432591705
LatentSpace_v18	Primary motor area	thalamus	64	0.3855957040362196
LatentSpace_v18	Primary motor area	CA1 field	65	0.3720028715332498
LatentSpace_v18	Primary motor area	inferior colliculus	66	0.37115666820840126
LatentSpace_v18	Primary motor area	cerebellar nuclei	67	0.35107621967107094
LatentSpace_v18	Primary motor area	globus pallidus	68	0.3334976053516539
LatentSpace_v18	Primary motor area	paraterminal gyrus	69	0.3274957080332244
LatentSpace_v18	Primary motor area	CA3 field	70	0.3251364678963879
LatentSpace_v18	Primary motor area	putamen	71	0.32156741477959994
LatentSpace_v18	Primary motor area	CA2 field	72	0.31587983291640837
LatentSpace_v18	Primary motor area	superior colliculus	73	0.3087904877974726
LatentSpace_v18	Primary motor area	subthalamus	74	0.307644041969601
LatentSpace_v18	Primary motor area	subiculum	75	0.30615855185512186
LatentSpace_v18	Primary motor area	caudate nucleus	76	0.29705359877011417
LatentSpace_v18	Primary motor area	myelencephalon	77	0.2903392778605387
LatentSpace_v18	Primary motor area	pretectal region	78	0.27459885719769084
LatentSpace_v18	Primary motor area	pons	79	0.2724673912851323
LatentSpace_v18	Primary motor area	midbrain tegmentum	80	0.22101843286697553
LatentSpace_v18	Primary motor area	epithalamus	81	0.2114701744998268
LatentSpace_v18	Primary motor area	CA4 field	82	0.16999591768090025
LatentSpace_v18	Primary motor area	nucleus accumbens	83	0.14373087496386727
LatentSpace_v18	Primary motor area	piriform cortex	84	0.13908277607452435
LatentSpace_v18	Primary motor area	substantia innominata	85	0.08010714690739654
LatentSpace_v18	Primary motor area	hypothalamus	86	0.06450190803063592
LatentSpace_v18	Primary motor area	septal nuclei	87	0.029504064540617297
LatentSpace_v18	Primary motor area	amygdala	88	0
LatentSpace_v19	Primary motor area	paracentral lobule, anterior part	1	1
LatentSpace_v19	Primary motor area	inferior frontal gyrus	2	0.9908972638070018
LatentSpace_v19	Primary motor area	middle frontal gyrus	3	0.9857448241685645
LatentSpace_v19	Primary motor area	inferior parietal lobule	4	0.9856699856354822
LatentSpace_v19	Primary motor area	precentral gyrus	5	0.9847559298365963
LatentSpace_v19	Primary motor area	occipito-temporal gyrus	6	0.9843179331313274
LatentSpace_v19	Primary motor area	precuneus	7	0.9806617059321298
LatentSpace_v19	Primary motor area	superior temporal gyrus	8	0.9749522669818143
LatentSpace_v19	Primary motor area	superior frontal gyrus	9	0.9736811720022303
LatentSpace_v19	Primary motor area	superior parietal lobule	10	0.9706982231102048
LatentSpace_v19	Primary motor area	Heschl's gyrus	11	0.9691124066485527
LatentSpace_v19	Primary motor area	transverse gyri	12	0.96880546947737
LatentSpace_v19	Primary motor area	inferior occipital gyrus	13	0.9632497498163667
LatentSpace_v19	Primary motor area	middle temporal gyrus	14	0.9606522079879626
LatentSpace_v19	Primary motor area	superior occipital gyrus	15	0.9591285338433028
LatentSpace_v19	Primary motor area	frontal pole	16	0.9561394902424925
LatentSpace_v19	Primary motor area	lateral orbital gyrus	17	0.954861740266517
LatentSpace_v19	Primary motor area	postcentral gyrus	18	0.9543972210445905
LatentSpace_v19	Primary motor area	paracentral lobule, posterior part	19	0.9502841560676787
LatentSpace_v19	Primary motor area	planum temporale	20	0.9466123785004448
LatentSpace_v19	Primary motor area	anterior orbital gyrus	21	0.9362761105849398
LatentSpace_v19	Primary motor area	frontal operculum	22	0.9294371692549998
LatentSpace_v19	Primary motor area	posterior orbital gyrus	23	0.9247041419402185
LatentSpace_v19	Primary motor area	cingulate gyrus	24	0.909978858219339
LatentSpace_v19	Primary motor area	inferior temporal gyrus	25	0.9018840130249073
LatentSpace_v19	Primary motor area	occipital pole	26	0.9015351641855707
LatentSpace_v19	Primary motor area	superior rostral gyrus	27	0.8968027462983921
LatentSpace_v19	Primary motor area	planum polare	28	0.894704259591394
LatentSpace_v19	Primary motor area	medial orbital gyrus	29	0.8823269057176562
LatentSpace_v19	Primary motor area	lingual gyrus	30	0.8767011261532728
LatentSpace_v19	Primary motor area	cuneus	31	0.8744282237371369
LatentSpace_v19	Primary motor area	insula	32	0.850009738929633
LatentSpace_v19	Primary motor area	gyrus rectus	33	0.8478786684465425
LatentSpace_v19	Primary motor area	inferior rostral gyrus	34	0.8379879763444845
LatentSpace_v19	Primary motor area	fusiform gyrus	35	0.8284269562137782
LatentSpace_v19	Primary motor area	temporal pole	36	0.6670763533434579
LatentSpace_v19	Primary motor area	claustrum	37	0.6429679257055826
LatentSpace_v19	Primary motor area	parolfactory gyri	38	0.6226509762505714
LatentSpace_v19	Primary motor area	parahippocampal gyrus	39	0.588854327454062
LatentSpace_v19	Primary motor area	dentate gyrus	40	0.5006068427717276
LatentSpace_v19	Primary motor area	paraterminal gyrus	41	0.4607718819195904
LatentSpace_v19	Primary motor area	CA1 field	42	0.39324651087857354
LatentSpace_v19	Primary motor area	caudate nucleus	43	0.3716105945191675
LatentSpace_v19	Primary motor area	putamen	44	0.3676546637254938
LatentSpace_v19	Primary motor area	CA2 field	45	0.33437703349477177
LatentSpace_v19	Primary motor area	vermal VIIAf	46	0.3168416112414202
LatentSpace_v19	Primary motor area	vermal V	47	0.3131010231219985
LatentSpace_v19	Primary motor area	vermal I-II	48	0.31136840173497515
LatentSpace_v19	Primary motor area	inferior colliculus	49	0.3111940989734165
LatentSpace_v19	Primary motor area	globus pallidus	50	0.30979799087874327
LatentSpace_v19	Primary motor area	CA3 field	51	0.3093110158079522
LatentSpace_v19	Primary motor area	vermal VIIB	52	0.30521455109184026
LatentSpace_v19	Primary motor area	subiculum	53	0.3040851008995035
LatentSpace_v19	Primary motor area	cerebellar nuclei	54	0.30397463069468306
LatentSpace_v19	Primary motor area	V	55	0.3003165629218728
LatentSpace_v19	Primary motor area	vermal VIIIB	56	0.2994538152347927
LatentSpace_v19	Primary motor area	VI	57	0.2991345241023502
LatentSpace_v19	Primary motor area	vermal IV	58	0.2979040891731471
LatentSpace_v19	Primary motor area	IX	59	0.297641260876737
LatentSpace_v19	Primary motor area	vermal III	60	0.29725986557584966
LatentSpace_v19	Primary motor area	crus I	61	0.2949748977757845
LatentSpace_v19	Primary motor area	myelencephalon	62	0.29270312589891057
LatentSpace_v19	Primary motor area	vermal VIIIA	63	0.29216057558642033
LatentSpace_v19	Primary motor area	crus II	64	0.2917391335978465
LatentSpace_v19	Primary motor area	vermal IX	65	0.2913127098157996
LatentSpace_v19	Primary motor area	III	66	0.2913007661311129
LatentSpace_v19	Primary motor area	VIIB	67	0.291234761121196
LatentSpace_v19	Primary motor area	VIIIA	68	0.29116384968075965
LatentSpace_v19	Primary motor area	vermal VI	69	0.2901221368730555
LatentSpace_v19	Primary motor area	subthalamus	70	0.2881684980880669
LatentSpace_v19	Primary motor area	IV	71	0.2864110103206308
LatentSpace_v19	Primary motor area	vermal VIIAt	72	0.2858205874485869
LatentSpace_v19	Primary motor area	X	73	0.2829483125832888
LatentSpace_v19	Primary motor area	thalamus	74	0.28246186399385215
LatentSpace_v19	Primary motor area	vermal X	75	0.27937284006404756
LatentSpace_v19	Primary motor area	VIIIB	76	0.27784228999221405
LatentSpace_v19	Primary motor area	pons	77	0.27418946725890164
LatentSpace_v19	Primary motor area	nucleus accumbens	78	0.26378814072275714
LatentSpace_v19	Primary motor area	superior colliculus	79	0.2627225551523775
LatentSpace_v19	Primary motor area	pretectal region	80	0.2502082594804084
LatentSpace_v19	Primary motor area	midbrain tegmentum	81	0.23294994193450352
LatentSpace_v19	Primary motor area	epithalamus	82	0.22511140522951434
LatentSpace_v19	Primary motor area	CA4 field	83	0.17009743928080062
LatentSpace_v19	Primary motor area	piriform cortex	84	0.10917600153470264
LatentSpace_v19	Primary motor area	substantia innominata	85	0.10415581532857072
LatentSpace_v19	Primary motor area	hypothalamus	86	0.09259537940445517
LatentSpace_v19	Primary motor area	septal nuclei	87	0.09105448941766865
LatentSpace_v19	Primary motor area	amygdala	88	0
LatentSpace_v20	Primary motor area	paracentral lobule, anterior part	1	1
LatentSpace_v20	Primary motor area	precentral gyrus	2	0.9874047983239854
LatentSpace_v20	Primary motor area	precuneus	3	0.9666695952940282
LatentSpace_v20	Primary motor area	occipito-temporal gyrus	4	0.9664796448326891
LatentSpace_v20	Primary motor area	superior parietal lobule	5	0.9619877419933484
LatentSpace_v20	Primary motor area	inferior parietal lobule	6	0.9611723918382259
LatentSpace_v20	Primary motor area	inferior frontal gyrus	7	0.9544192819527486
LatentSpace_v20	Primary motor area	Heschl's gyrus	8	0.9538363007242415
LatentSpace_v20	Primary motor area	transverse gyri	9	0.9521002613781162
LatentSpace_v20	Primary motor area	middle frontal gyrus	10	0.9512324455964912
LatentSpace_v20	Primary motor area	inferior occipital gyrus	11	0.9502490009906086
LatentSpace_v20	Primary motor area	postcentral gyrus	12	0.9483579424794997
LatentSpace_v20	Primary motor area	superior occipital gyrus	13	0.9449779793052061
LatentSpace_v20	Primary motor area	superior temporal gyrus	14	0.9419752106106429
LatentSpace_v20	Primary motor area	superior frontal gyrus	15	0.9333828835123167
LatentSpace_v20	Primary motor area	paracentral lobule, posterior part	16	0.9320076386177691
LatentSpace_v20	Primary motor area	planum temporale	17	0.9288231490792225
LatentSpace_v20	Primary motor area	middle temporal gyrus	18	0.927867534021716
LatentSpace_v20	Primary motor area	frontal pole	19	0.9147174885799164
LatentSpace_v20	Primary motor area	lateral orbital gyrus	20	0.9091198729844128
LatentSpace_v20	Primary motor area	posterior orbital gyrus	21	0.9031718667772844
LatentSpace_v20	Primary motor area	occipital pole	22	0.9027740622307463
LatentSpace_v20	Primary motor area	anterior orbital gyrus	23	0.8931202646268476
LatentSpace_v20	Primary motor area	cuneus	24	0.8851385331101693
LatentSpace_v20	Primary motor area	frontal operculum	25	0.8847105760584237
LatentSpace_v20	Primary motor area	lingual gyrus	26	0.8765498261175307
LatentSpace_v20	Primary motor area	inferior temporal gyrus	27	0.8634741597539741
LatentSpace_v20	Primary motor area	planum polare	28	0.8598523280579146
LatentSpace_v20	Primary motor area	cingulate gyrus	29	0.8551287385158418
LatentSpace_v20	Primary motor area	superior rostral gyrus	30	0.8382454694084532
LatentSpace_v20	Primary motor area	medial orbital gyrus	31	0.8279156034090549
LatentSpace_v20	Primary motor area	gyrus rectus	32	0.8017463808615674
LatentSpace_v20	Primary motor area	insula	33	0.7997242627904464
LatentSpace_v20	Primary motor area	fusiform gyrus	34	0.7963146562273986
LatentSpace_v20	Primary motor area	inferior rostral gyrus	35	0.774715083805146
LatentSpace_v20	Primary motor area	claustrum	36	0.7015879931244363
LatentSpace_v20	Primary motor area	temporal pole	37	0.6428640822630913
LatentSpace_v20	Primary motor area	parolfactory gyri	38	0.5492379948677641
LatentSpace_v20	Primary motor area	parahippocampal gyrus	39	0.5357013743164067
LatentSpace_v20	Primary motor area	dentate gyrus	40	0.42035702741973263
LatentSpace_v20	Primary motor area	IX	41	0.3733590184009013
LatentSpace_v20	Primary motor area	vermal VIIAt	42	0.366490067098363
LatentSpace_v20	Primary motor area	crus II	43	0.36408187118304697
LatentSpace_v20	Primary motor area	vermal V	44	0.3624402521006322
LatentSpace_v20	Primary motor area	VIIIA	45	0.3615057960343566
LatentSpace_v20	Primary motor area	VIIB	46	0.3568064772810211
LatentSpace_v20	Primary motor area	vermal IX	47	0.3464326693962008
LatentSpace_v20	Primary motor area	crus I	48	0.3446552429809816
LatentSpace_v20	Primary motor area	V	49	0.34389862187617326
LatentSpace_v20	Primary motor area	vermal VIIB	50	0.3436611733548126
LatentSpace_v20	Primary motor area	VI	51	0.34345420981846914
LatentSpace_v20	Primary motor area	vermal VIIIA	52	0.34344505281242244
LatentSpace_v20	Primary motor area	VIIIB	53	0.33810700824999024
LatentSpace_v20	Primary motor area	vermal VIIAf	54	0.33393766844642014
LatentSpace_v20	Primary motor area	IV	55	0.33062550828811116
LatentSpace_v20	Primary motor area	CA1 field	56	0.32629666422355924
LatentSpace_v20	Primary motor area	vermal IV	57	0.3244236357709404
LatentSpace_v20	Primary motor area	vermal VIIIB	58	0.31790808164965795
LatentSpace_v20	Primary motor area	CA3 field	59	0.31505446825444
LatentSpace_v20	Primary motor area	vermal III	60	0.31386049924905907
LatentSpace_v20	Primary motor area	III	61	0.30921501711571087
LatentSpace_v20	Primary motor area	CA2 field	62	0.30551359777872145
LatentSpace_v20	Primary motor area	vermal VI	63	0.30233123624061414
LatentSpace_v20	Primary motor area	putamen	64	0.27411258979972003
LatentSpace_v20	Primary motor area	X	65	0.2698474260719748
LatentSpace_v20	Primary motor area	subthalamus	66	0.2654258939739284
LatentSpace_v20	Primary motor area	subiculum	67	0.2637407005228146
LatentSpace_v20	Primary motor area	pons	68	0.26163024539069957
LatentSpace_v20	Primary motor area	caudate nucleus	69	0.2599968873566182
LatentSpace_v20	Primary motor area	vermal I-II	70	0.2585131043052419
LatentSpace_v20	Primary motor area	myelencephalon	71	0.25791143256724675
LatentSpace_v20	Primary motor area	globus pallidus	72	0.25233382435901514
LatentSpace_v20	Primary motor area	midbrain tegmentum	73	0.23564276311928584
LatentSpace_v20	Primary motor area	cerebellar nuclei	74	0.23361518537361134
LatentSpace_v20	Primary motor area	paraterminal gyrus	75	0.23040561779900823
LatentSpace_v20	Primary motor area	pretectal region	76	0.2193247399409722
LatentSpace_v20	Primary motor area	thalamus	77	0.21902168581501935
LatentSpace_v20	Primary motor area	superior colliculus	78	0.21548729020672405
LatentSpace_v20	Primary motor area	vermal X	79	0.21165137487941924
LatentSpace_v20	Primary motor area	inferior colliculus	80	0.20422135042457168
LatentSpace_v20	Primary motor area	epithalamus	81	0.17363744696761016
LatentSpace_v20	Primary motor area	hypothalamus	82	0.15998701150148142
LatentSpace_v20	Primary motor area	CA4 field	83	0.15806845219700258
LatentSpace_v20	Primary motor area	nucleus accumbens	84	0.1467626278199645
LatentSpace_v20	Primary motor area	substantia innominata	85	0.13968589235585596
LatentSpace_v20	Primary motor area	septal nuclei	86	0.08504155546530469
LatentSpace_v20	Primary motor area	piriform cortex	87	0.08230998036305355
LatentSpace_v20	Primary motor area	amygdala	88	0
LatentSpace_v21	Primary motor area	paracentral lobule, anterior part	1	1
LatentSpace_v21	Primary motor area	precentral gyrus	2	0.984973211559442
LatentSpace_v21	Primary motor area	precuneus	3	0.9682207547580906
LatentSpace_v21	Primary motor area	occipito-temporal gyrus	4	0.9662475981780657
LatentSpace_v21	Primary motor area	inferior parietal lobule	5	0.9653217301996221
LatentSpace_v21	Primary motor area	inferior frontal gyrus	6	0.9620862148216429
LatentSpace_v21	Primary motor area	middle frontal gyrus	7	0.9617582224595433
LatentSpace_v21	Primary motor area	superior parietal lobule	8	0.9606922774550637
LatentSpace_v21	Primary motor area	transverse gyri	9	0.9564055530664883
LatentSpace_v21	Primary motor area	inferior occipital gyrus	10	0.9467772520919119
LatentSpace_v21	Primary motor area	Heschl's gyrus	11	0.9462732842853196
LatentSpace_v21	Primary motor area	paracentral lobule, posterior part	12	0.941812303656686
LatentSpace_v21	Primary motor area	superior frontal gyrus	13	0.9408264028610507
LatentSpace_v21	Primary motor area	superior temporal gyrus	14	0.9400168366898632
LatentSpace_v21	Primary motor area	superior occipital gyrus	15	0.939254820355822
LatentSpace_v21	Primary motor area	postcentral gyrus	16	0.9353262409527253
LatentSpace_v21	Primary motor area	planum temporale	17	0.9323126579918926
LatentSpace_v21	Primary motor area	middle temporal gyrus	18	0.9280247703324571
LatentSpace_v21	Primary motor area	frontal pole	19	0.9263961715025111
LatentSpace_v21	Primary motor area	lateral orbital gyrus	20	0.915143216757367
LatentSpace_v21	Primary motor area	anterior orbital gyrus	21	0.8865031729180901
LatentSpace_v21	Primary motor area	posterior orbital gyrus	22	0.880331940455568
LatentSpace_v21	Primary motor area	occipital pole	23	0.8781406285827618
LatentSpace_v21	Primary motor area	frontal operculum	24	0.8761174576384455
LatentSpace_v21	Primary motor area	lingual gyrus	25	0.8680726000569047
LatentSpace_v21	Primary motor area	cuneus	26	0.8671729458470547
LatentSpace_v21	Primary motor area	cingulate gyrus	27	0.8518127046167572
LatentSpace_v21	Primary motor area	inferior temporal gyrus	28	0.8495804979674069
LatentSpace_v21	Primary motor area	planum polare	29	0.8393177018167302
LatentSpace_v21	Primary motor area	superior rostral gyrus	30	0.8262371014442348
LatentSpace_v21	Primary motor area	medial orbital gyrus	31	0.8185978520181781
LatentSpace_v21	Primary motor area	gyrus rectus	32	0.7839556033096161
LatentSpace_v21	Primary motor area	insula	33	0.7696888474690221
LatentSpace_v21	Primary motor area	fusiform gyrus	34	0.7583442391001608
LatentSpace_v21	Primary motor area	inferior rostral gyrus	35	0.7548771775822384
LatentSpace_v21	Primary motor area	claustrum	36	0.6319841603524946
LatentSpace_v21	Primary motor area	temporal pole	37	0.5938673806005005
LatentSpace_v21	Primary motor area	parolfactory gyri	38	0.5124492019890404
LatentSpace_v21	Primary motor area	parahippocampal gyrus	39	0.5111409878217392
LatentSpace_v21	Primary motor area	IX	40	0.3269620904538996
LatentSpace_v21	Primary motor area	crus II	41	0.3060494488942306
LatentSpace_v21	Primary motor area	VIIIA	42	0.30179145191064427
LatentSpace_v21	Primary motor area	vermal VIIAt	43	0.29654226198540196
LatentSpace_v21	Primary motor area	putamen	44	0.29558172388614395
LatentSpace_v21	Primary motor area	vermal V	45	0.2911171988327841
LatentSpace_v21	Primary motor area	VIIB	46	0.28766510702352166
LatentSpace_v21	Primary motor area	V	47	0.28435942028794553
LatentSpace_v21	Primary motor area	dentate gyrus	48	0.2841773104209716
LatentSpace_v21	Primary motor area	crus I	49	0.2810269932499222
LatentSpace_v21	Primary motor area	caudate nucleus	50	0.2800641946795323
LatentSpace_v21	Primary motor area	VI	51	0.27760013549306456
LatentSpace_v21	Primary motor area	IV	52	0.27217101779032915
LatentSpace_v21	Primary motor area	VIIIB	53	0.268217599135884
LatentSpace_v21	Primary motor area	vermal VIIAf	54	0.26690692749579353
LatentSpace_v21	Primary motor area	III	55	0.2641462107330183
LatentSpace_v21	Primary motor area	paraterminal gyrus	56	0.26361601712783206
LatentSpace_v21	Primary motor area	vermal VIIIA	57	0.2583179006562639
LatentSpace_v21	Primary motor area	vermal IX	58	0.2538364512297911
LatentSpace_v21	Primary motor area	vermal VIIB	59	0.2480691552323698
LatentSpace_v21	Primary motor area	vermal IV	60	0.24532033590375502
LatentSpace_v21	Primary motor area	thalamus	61	0.23945422702589117
LatentSpace_v21	Primary motor area	CA1 field	62	0.22996396317268228
LatentSpace_v21	Primary motor area	vermal III	63	0.22927538096814876
LatentSpace_v21	Primary motor area	vermal VI	64	0.2277519201216911
LatentSpace_v21	Primary motor area	subthalamus	65	0.22536380029208863
LatentSpace_v21	Primary motor area	cerebellar nuclei	66	0.22266747714303392
LatentSpace_v21	Primary motor area	subiculum	67	0.21732079907835952
LatentSpace_v21	Primary motor area	X	68	0.2157353714271555
LatentSpace_v21	Primary motor area	inferior colliculus	69	0.20768866128135963
LatentSpace_v21	Primary motor area	vermal VIIIB	70	0.2059582012302975
LatentSpace_v21	Primary motor area	pons	71	0.20137111578104658
LatentSpace_v21	Primary motor area	superior colliculus	72	0.20102134144499312
LatentSpace_v21	Primary motor area	globus pallidus	73	0.19799758370137902
LatentSpace_v21	Primary motor area	myelencephalon	74	0.19449517207117312
LatentSpace_v21	Primary motor area	CA2 field	75	0.17780051700637445
LatentSpace_v21	Primary motor area	pretectal region	76	0.17527980098909904
LatentSpace_v21	Primary motor area	vermal I-II	77	0.17323440276377866
LatentSpace_v21	Primary motor area	CA3 field	78	0.16270224124075847
LatentSpace_v21	Primary motor area	midbrain tegmentum	79	0.15924226936923241
LatentSpace_v21	Primary motor area	vermal X	80	0.12615857386011228
LatentSpace_v21	Primary motor area	nucleus accumbens	81	0.11920103800697854
LatentSpace_v21	Primary motor area	piriform cortex	82	0.11752198072793664
LatentSpace_v21	Primary motor area	epithalamus	83	0.09747759795507469
LatentSpace_v21	Primary motor area	hypothalamus	84	0.07010259511134176
LatentSpace_v21	Primary motor area	CA4 field	85	0.06444017778560635
LatentSpace_v21	Primary motor area	substantia innominata	86	0.046229797252961516
LatentSpace_v21	Primary motor area	amygdala	87	0.02610736353089548
LatentSpace_v21	Primary motor area	septal nuclei	88	0
LatentSpace_v22	Primary motor area	paracentral lobule, anterior part	1	1
LatentSpace_v22	Primary motor area	precentral gyrus	2	0.9881570784375651
LatentSpace_v22	Primary motor area	middle frontal gyrus	3	0.9849923461839434
LatentSpace_v22	Primary motor area	inferior parietal lobule	4	0.9833959978700517
LatentSpace_v22	Primary motor area	inferior frontal gyrus	5	0.9811447924067578
LatentSpace_v22	Primary motor area	precuneus	6	0.9781263569266095
LatentSpace_v22	Primary motor area	occipito-temporal gyrus	7	0.9759332849156257
LatentSpace_v22	Primary motor area	superior frontal gyrus	8	0.9730630197071867
LatentSpace_v22	Primary motor area	superior temporal gyrus	9	0.9678182737531821
LatentSpace_v22	Primary motor area	superior parietal lobule	10	0.9671294773762306
LatentSpace_v22	Primary motor area	transverse gyri	11	0.9610037361428776
LatentSpace_v22	Primary motor area	middle temporal gyrus	12	0.9547710464895675
LatentSpace_v22	Primary motor area	Heschl's gyrus	13	0.9529563025116556
LatentSpace_v22	Primary motor area	planum temporale	14	0.9517465978437184
LatentSpace_v22	Primary motor area	lateral orbital gyrus	15	0.9463479287630011
LatentSpace_v22	Primary motor area	postcentral gyrus	16	0.9435597555440216
LatentSpace_v22	Primary motor area	paracentral lobule, posterior part	17	0.943255106798862
LatentSpace_v22	Primary motor area	inferior occipital gyrus	18	0.9431114334127559
LatentSpace_v22	Primary motor area	frontal pole	19	0.9417670447618022
LatentSpace_v22	Primary motor area	superior occipital gyrus	20	0.9374187888279687
LatentSpace_v22	Primary motor area	frontal operculum	21	0.9253479041702444
LatentSpace_v22	Primary motor area	anterior orbital gyrus	22	0.9248383397216065
LatentSpace_v22	Primary motor area	posterior orbital gyrus	23	0.9226311662092307
LatentSpace_v22	Primary motor area	cingulate gyrus	24	0.9049769400735087
LatentSpace_v22	Primary motor area	inferior temporal gyrus	25	0.9009720952480601
LatentSpace_v22	Primary motor area	occipital pole	26	0.8853948504968039
LatentSpace_v22	Primary motor area	medial orbital gyrus	27	0.8765824699330496
LatentSpace_v22	Primary motor area	superior rostral gyrus	28	0.8744039322377707
LatentSpace_v22	Primary motor area	planum polare	29	0.8706454491150839
LatentSpace_v22	Primary motor area	lingual gyrus	30	0.8613375759918179
LatentSpace_v22	Primary motor area	cuneus	31	0.8590823117179832
LatentSpace_v22	Primary motor area	gyrus rectus	32	0.8465158005519083
LatentSpace_v22	Primary motor area	fusiform gyrus	33	0.8281288905715487
LatentSpace_v22	Primary motor area	insula	34	0.8255559395924132
LatentSpace_v22	Primary motor area	inferior rostral gyrus	35	0.8246474820934062
LatentSpace_v22	Primary motor area	claustrum	36	0.7092959582427951
LatentSpace_v22	Primary motor area	temporal pole	37	0.6920619458126995
LatentSpace_v22	Primary motor area	parolfactory gyri	38	0.6239269857985457
LatentSpace_v22	Primary motor area	parahippocampal gyrus	39	0.6233374708317545
LatentSpace_v22	Primary motor area	dentate gyrus	40	0.46252131583729983
LatentSpace_v22	Primary motor area	paraterminal gyrus	41	0.4507985767160183
LatentSpace_v22	Primary motor area	CA1 field	42	0.441259434541449
LatentSpace_v22	Primary motor area	CA2 field	43	0.3769174487726791
LatentSpace_v22	Primary motor area	CA3 field	44	0.36995198467432844
LatentSpace_v22	Primary motor area	subiculum	45	0.3578417527282214
LatentSpace_v22	Primary motor area	CA4 field	46	0.23343047090635383
LatentSpace_v22	Primary motor area	pons	47	0.21336565585742448
LatentSpace_v22	Primary motor area	vermal V	48	0.21120865403981265
LatentSpace_v22	Primary motor area	IX	49	0.20674397692747545
LatentSpace_v22	Primary motor area	crus II	50	0.20643222623361324
LatentSpace_v22	Primary motor area	VIIIA	51	0.20398669063496105
LatentSpace_v22	Primary motor area	midbrain tegmentum	52	0.200995598676608
LatentSpace_v22	Primary motor area	piriform cortex	53	0.2005643204458625
LatentSpace_v22	Primary motor area	V	54	0.1974530871930444
LatentSpace_v22	Primary motor area	vermal VIIAt	55	0.1973026823870848
LatentSpace_v22	Primary motor area	VI	56	0.1939012748422428
LatentSpace_v22	Primary motor area	VIIB	57	0.19282124224464042
LatentSpace_v22	Primary motor area	vermal VIIAf	58	0.19149774010452839
LatentSpace_v22	Primary motor area	crus I	59	0.18656413219577814
LatentSpace_v22	Primary motor area	vermal VIIIA	60	0.1851736181285106
LatentSpace_v22	Primary motor area	vermal IV	61	0.1851415020338975
LatentSpace_v22	Primary motor area	hypothalamus	62	0.18492379471482703
LatentSpace_v22	Primary motor area	myelencephalon	63	0.1835389906276853
[truncated: 42,089 more rows]
