# Supplementary material for: Whole-brain comparison of rodent and human brains using spatial transcriptomics
Source: eLife. 2022 Nov 7;11:e79418. doi: 10.7554/eLife.79418 (PMC9708081; doi:10.7554/eLife.79418)
Supplement: Figure 3—source data 2. [file elife-79418-fig3-data2.csv]

Data	MouseRegion	RankLatentSpace	RankHomologousGenes	RankDifference
LatentSpace_v1	Cortical subplate-other	11	15	-4
LatentSpace_v1	Claustrum	20	33	-13
LatentSpace_v1	Endopiriform nucleus	19	32	-13
LatentSpace_v1	Olfactory areas-other	13	33	-20
LatentSpace_v1	Postpiriform transition area	10	27	-17
LatentSpace_v1	Piriform area	20	34	-14
LatentSpace_v1	Taenia tecta	11	28	-17
LatentSpace_v1	Cortical amygdalar area	9	19	-10
LatentSpace_v1	Piriform-amygdalar area	11	28	-17
LatentSpace_v1	Main olfactory bulb	23	10	13
LatentSpace_v1	Accessory olfactory bulb	56	19	37
LatentSpace_v1	Anterior olfactory nucleus	12	32	-20
LatentSpace_v1	Subiculum	5	35	-30
LatentSpace_v1	Entorhinal area	17	22	-5
LatentSpace_v1	Field CA1	8	25	-17
LatentSpace_v1	Field CA2	10	14	-4
LatentSpace_v1	Field CA3	6	8	-2
LatentSpace_v1	Dentate gyrus	7	3	4
LatentSpace_v1	Anterior cingulate area	37	39	-2
LatentSpace_v1	Infralimbic area	12	26	-14
LatentSpace_v1	Retrosplenial area	29	36	-7
LatentSpace_v1	Prelimbic area	33	35	-2
LatentSpace_v1	Primary auditory area	37	38	-1
LatentSpace_v1	Dorsal auditory area	35	38	-3
LatentSpace_v1	Ventral auditory area	38	38	0
LatentSpace_v1	Agranular insular area	24	37	-13
LatentSpace_v1	Ectorhinal area	24	33	-9
LatentSpace_v1	Primary motor area	35	38	-3
LatentSpace_v1	Secondary motor area	37	38	-1
LatentSpace_v1	Frontal pole, cerebral cortex	37	40	-3
LatentSpace_v1	Orbital area	25	35	-10
LatentSpace_v1	Posterior parietal association areas	35	38	-3
LatentSpace_v1	Perirhinal area	24	32	-8
LatentSpace_v1	Primary somatosensory area	34	35	-1
LatentSpace_v1	Supplemental somatosensory area	38	38	0
LatentSpace_v1	Temporal association areas	36	33	3
LatentSpace_v1	Visual areas	35	38	-3
LatentSpace_v1	Pallidum	8	6	2
LatentSpace_v1	Striatum ventral region	8	3	5
LatentSpace_v1	Lateral septal complex	9	4	5
LatentSpace_v1	Caudoputamen	3	3	0
LatentSpace_v1	Medial amygdalar nucleus	10	7	3
LatentSpace_v1	Hypothalamus	6	9	-3
LatentSpace_v1	Thalamus	13	1	12
LatentSpace_v1	Inferior colliculus	6	9	-3
LatentSpace_v1	Superior colliculus, sensory related	4	10	-6
LatentSpace_v1	Midbrain raphe nuclei	14	12	2
LatentSpace_v1	Midbrain-other	10	10	0
LatentSpace_v1	Periaqueductal gray	10	11	-1
LatentSpace_v1	Pons	9	9	0
LatentSpace_v1	Medulla	9	9	0
LatentSpace_v1	Lingula (I)	13	34	-21
LatentSpace_v1	Central lobule	21	34	-13
LatentSpace_v1	Culmen	25	34	-9
LatentSpace_v1	Declive (VI)	23	28	-5
LatentSpace_v1	Folium-tuber vermis (VII)	23	31	-8
LatentSpace_v1	Pyramus (VIII)	25	32	-7
LatentSpace_v1	Uvula (IX)	25	34	-9
LatentSpace_v1	Nodulus (X)	14	35	-21
LatentSpace_v1	Simple lobule	23	29	-6
LatentSpace_v1	Crus 1	23	26	-3
LatentSpace_v1	Crus 2	22	27	-5
LatentSpace_v1	Paramedian lobule	23	33	-10
LatentSpace_v1	Copula pyramidis	25	34	-9
LatentSpace_v1	Flocculus	30	34	-4
LatentSpace_v1	Paraflocculus	23	36	-13
LatentSpace_v1	Cerebellar nuclei	10	11	-1
LatentSpace_v2	Cortical subplate-other	12	15	-3
LatentSpace_v2	Claustrum	30	33	-3
LatentSpace_v2	Endopiriform nucleus	17	32	-15
LatentSpace_v2	Olfactory areas-other	10	33	-23
LatentSpace_v2	Postpiriform transition area	12	27	-15
LatentSpace_v2	Piriform area	22	34	-12
LatentSpace_v2	Taenia tecta	14	28	-14
LatentSpace_v2	Cortical amygdalar area	10	19	-9
LatentSpace_v2	Piriform-amygdalar area	13	28	-15
LatentSpace_v2	Main olfactory bulb	25	10	15
LatentSpace_v2	Accessory olfactory bulb	48	19	29
LatentSpace_v2	Anterior olfactory nucleus	7	32	-25
LatentSpace_v2	Subiculum	3	35	-32
LatentSpace_v2	Entorhinal area	13	22	-9
LatentSpace_v2	Field CA1	6	25	-19
LatentSpace_v2	Field CA2	7	14	-7
LatentSpace_v2	Field CA3	5	8	-3
LatentSpace_v2	Dentate gyrus	9	3	6
LatentSpace_v2	Anterior cingulate area	36	39	-3
LatentSpace_v2	Infralimbic area	12	26	-14
LatentSpace_v2	Retrosplenial area	30	36	-6
LatentSpace_v2	Prelimbic area	27	35	-8
LatentSpace_v2	Primary auditory area	35	38	-3
LatentSpace_v2	Dorsal auditory area	35	38	-3
LatentSpace_v2	Ventral auditory area	38	38	0
LatentSpace_v2	Agranular insular area	25	37	-12
LatentSpace_v2	Ectorhinal area	26	33	-7
LatentSpace_v2	Primary motor area	35	38	-3
LatentSpace_v2	Secondary motor area	36	38	-2
LatentSpace_v2	Frontal pole, cerebral cortex	30	40	-10
LatentSpace_v2	Orbital area	25	35	-10
LatentSpace_v2	Posterior parietal association areas	35	38	-3
LatentSpace_v2	Perirhinal area	19	32	-13
LatentSpace_v2	Primary somatosensory area	31	35	-4
LatentSpace_v2	Supplemental somatosensory area	37	38	-1
LatentSpace_v2	Temporal association areas	34	33	1
LatentSpace_v2	Visual areas	35	38	-3
LatentSpace_v2	Pallidum	11	6	5
LatentSpace_v2	Striatum ventral region	11	3	8
LatentSpace_v2	Lateral septal complex	12	4	8
LatentSpace_v2	Caudoputamen	3	3	0
LatentSpace_v2	Medial amygdalar nucleus	13	7	6
LatentSpace_v2	Hypothalamus	11	9	2
LatentSpace_v2	Thalamus	13	1	12
LatentSpace_v2	Inferior colliculus	9	9	0
LatentSpace_v2	Superior colliculus, sensory related	9	10	-1
LatentSpace_v2	Midbrain raphe nuclei	14	12	2
LatentSpace_v2	Midbrain-other	13	10	3
LatentSpace_v2	Periaqueductal gray	12	11	1
LatentSpace_v2	Pons	10	9	1
LatentSpace_v2	Medulla	11	9	2
LatentSpace_v2	Lingula (I)	13	34	-21
LatentSpace_v2	Central lobule	12	34	-22
LatentSpace_v2	Culmen	28	34	-6
LatentSpace_v2	Declive (VI)	23	28	-5
LatentSpace_v2	Folium-tuber vermis (VII)	23	31	-8
LatentSpace_v2	Pyramus (VIII)	23	32	-9
LatentSpace_v2	Uvula (IX)	16	34	-18
LatentSpace_v2	Nodulus (X)	13	35	-22
LatentSpace_v2	Simple lobule	24	29	-5
LatentSpace_v2	Crus 1	23	26	-3
LatentSpace_v2	Crus 2	22	27	-5
LatentSpace_v2	Paramedian lobule	23	33	-10
LatentSpace_v2	Copula pyramidis	23	34	-11
LatentSpace_v2	Flocculus	24	34	-10
LatentSpace_v2	Paraflocculus	23	36	-13
LatentSpace_v2	Cerebellar nuclei	12	11	1
LatentSpace_v3	Cortical subplate-other	10	15	-5
LatentSpace_v3	Claustrum	19	33	-14
LatentSpace_v3	Endopiriform nucleus	9	32	-23
LatentSpace_v3	Olfactory areas-other	19	33	-14
LatentSpace_v3	Postpiriform transition area	10	27	-17
LatentSpace_v3	Piriform area	12	34	-22
LatentSpace_v3	Taenia tecta	14	28	-14
LatentSpace_v3	Cortical amygdalar area	8	19	-11
LatentSpace_v3	Piriform-amygdalar area	8	28	-20
LatentSpace_v3	Main olfactory bulb	11	10	1
LatentSpace_v3	Accessory olfactory bulb	21	19	2
LatentSpace_v3	Anterior olfactory nucleus	12	32	-20
LatentSpace_v3	Subiculum	8	35	-27
LatentSpace_v3	Entorhinal area	10	22	-12
LatentSpace_v3	Field CA1	16	25	-9
LatentSpace_v3	Field CA2	21	14	7
LatentSpace_v3	Field CA3	6	8	-2
LatentSpace_v3	Dentate gyrus	7	3	4
LatentSpace_v3	Anterior cingulate area	35	39	-4
LatentSpace_v3	Infralimbic area	12	26	-14
LatentSpace_v3	Retrosplenial area	25	36	-11
LatentSpace_v3	Prelimbic area	31	35	-4
LatentSpace_v3	Primary auditory area	36	38	-2
LatentSpace_v3	Dorsal auditory area	35	38	-3
LatentSpace_v3	Ventral auditory area	34	38	-4
LatentSpace_v3	Agranular insular area	23	37	-14
LatentSpace_v3	Ectorhinal area	22	33	-11
LatentSpace_v3	Primary motor area	35	38	-3
LatentSpace_v3	Secondary motor area	37	38	-1
LatentSpace_v3	Frontal pole, cerebral cortex	32	40	-8
LatentSpace_v3	Orbital area	25	35	-10
LatentSpace_v3	Posterior parietal association areas	35	38	-3
LatentSpace_v3	Perirhinal area	18	32	-14
LatentSpace_v3	Primary somatosensory area	29	35	-6
LatentSpace_v3	Supplemental somatosensory area	38	38	0
LatentSpace_v3	Temporal association areas	26	33	-7
LatentSpace_v3	Visual areas	35	38	-3
LatentSpace_v3	Pallidum	9	6	3
LatentSpace_v3	Striatum ventral region	7	3	4
LatentSpace_v3	Lateral septal complex	7	4	3
LatentSpace_v3	Caudoputamen	3	3	0
LatentSpace_v3	Medial amygdalar nucleus	9	7	2
LatentSpace_v3	Hypothalamus	8	9	-1
LatentSpace_v3	Thalamus	10	1	9
LatentSpace_v3	Inferior colliculus	6	9	-3
LatentSpace_v3	Superior colliculus, sensory related	5	10	-5
LatentSpace_v3	Midbrain raphe nuclei	15	12	3
LatentSpace_v3	Midbrain-other	11	10	1
LatentSpace_v3	Periaqueductal gray	11	11	0
LatentSpace_v3	Pons	10	9	1
LatentSpace_v3	Medulla	8	9	-1
LatentSpace_v3	Lingula (I)	13	34	-21
LatentSpace_v3	Central lobule	30	34	-4
LatentSpace_v3	Culmen	26	34	-8
LatentSpace_v3	Declive (VI)	23	28	-5
LatentSpace_v3	Folium-tuber vermis (VII)	23	31	-8
LatentSpace_v3	Pyramus (VIII)	25	32	-7
LatentSpace_v3	Uvula (IX)	33	34	-1
LatentSpace_v3	Nodulus (X)	15	35	-20
LatentSpace_v3	Simple lobule	23	29	-6
LatentSpace_v3	Crus 1	23	26	-3
LatentSpace_v3	Crus 2	22	27	-5
LatentSpace_v3	Paramedian lobule	23	33	-10
LatentSpace_v3	Copula pyramidis	26	34	-8
LatentSpace_v3	Flocculus	32	34	-2
LatentSpace_v3	Paraflocculus	26	36	-10
LatentSpace_v3	Cerebellar nuclei	27	11	16
LatentSpace_v4	Cortical subplate-other	5	15	-10
LatentSpace_v4	Claustrum	30	33	-3
LatentSpace_v4	Endopiriform nucleus	6	32	-26
LatentSpace_v4	Olfactory areas-other	11	33	-22
LatentSpace_v4	Postpiriform transition area	11	27	-16
LatentSpace_v4	Piriform area	5	34	-29
LatentSpace_v4	Taenia tecta	14	28	-14
LatentSpace_v4	Cortical amygdalar area	3	19	-16
LatentSpace_v4	Piriform-amygdalar area	5	28	-23
LatentSpace_v4	Main olfactory bulb	20	10	10
LatentSpace_v4	Accessory olfactory bulb	26	19	7
LatentSpace_v4	Anterior olfactory nucleus	10	32	-22
LatentSpace_v4	Subiculum	6	35	-29
LatentSpace_v4	Entorhinal area	8	22	-14
LatentSpace_v4	Field CA1	10	25	-15
LatentSpace_v4	Field CA2	10	14	-4
LatentSpace_v4	Field CA3	7	8	-1
LatentSpace_v4	Dentate gyrus	10	3	7
LatentSpace_v4	Anterior cingulate area	36	39	-3
LatentSpace_v4	Infralimbic area	13	26	-13
LatentSpace_v4	Retrosplenial area	26	36	-10
LatentSpace_v4	Prelimbic area	28	35	-7
LatentSpace_v4	Primary auditory area	36	38	-2
LatentSpace_v4	Dorsal auditory area	35	38	-3
LatentSpace_v4	Ventral auditory area	37	38	-1
LatentSpace_v4	Agranular insular area	19	37	-18
LatentSpace_v4	Ectorhinal area	24	33	-9
LatentSpace_v4	Primary motor area	35	38	-3
LatentSpace_v4	Secondary motor area	37	38	-1
LatentSpace_v4	Frontal pole, cerebral cortex	25	40	-15
LatentSpace_v4	Orbital area	24	35	-11
LatentSpace_v4	Posterior parietal association areas	35	38	-3
LatentSpace_v4	Perirhinal area	18	32	-14
LatentSpace_v4	Primary somatosensory area	32	35	-3
LatentSpace_v4	Supplemental somatosensory area	36	38	-2
LatentSpace_v4	Temporal association areas	35	33	2
LatentSpace_v4	Visual areas	35	38	-3
LatentSpace_v4	Pallidum	6	6	0
LatentSpace_v4	Striatum ventral region	6	3	3
LatentSpace_v4	Lateral septal complex	7	4	3
LatentSpace_v4	Caudoputamen	3	3	0
LatentSpace_v4	Medial amygdalar nucleus	9	7	2
LatentSpace_v4	Hypothalamus	9	9	0
LatentSpace_v4	Thalamus	6	1	5
LatentSpace_v4	Inferior colliculus	9	9	0
LatentSpace_v4	Superior colliculus, sensory related	8	10	-2
LatentSpace_v4	Midbrain raphe nuclei	14	12	2
LatentSpace_v4	Midbrain-other	12	10	2
LatentSpace_v4	Periaqueductal gray	14	11	3
LatentSpace_v4	Pons	9	9	0
LatentSpace_v4	Medulla	10	9	1
LatentSpace_v4	Lingula (I)	13	34	-21
LatentSpace_v4	Central lobule	12	34	-22
LatentSpace_v4	Culmen	28	34	-6
LatentSpace_v4	Declive (VI)	23	28	-5
LatentSpace_v4	Folium-tuber vermis (VII)	23	31	-8
LatentSpace_v4	Pyramus (VIII)	23	32	-9
LatentSpace_v4	Uvula (IX)	28	34	-6
LatentSpace_v4	Nodulus (X)	22	35	-13
LatentSpace_v4	Simple lobule	22	29	-7
LatentSpace_v4	Crus 1	23	26	-3
LatentSpace_v4	Crus 2	23	27	-4
LatentSpace_v4	Paramedian lobule	23	33	-10
LatentSpace_v4	Copula pyramidis	23	34	-11
LatentSpace_v4	Flocculus	28	34	-6
LatentSpace_v4	Paraflocculus	23	36	-13
LatentSpace_v4	Cerebellar nuclei	33	11	22
LatentSpace_v5	Cortical subplate-other	9	15	-6
LatentSpace_v5	Claustrum	25	33	-8
LatentSpace_v5	Endopiriform nucleus	17	32	-15
LatentSpace_v5	Olfactory areas-other	24	33	-9
LatentSpace_v5	Postpiriform transition area	7	27	-20
LatentSpace_v5	Piriform area	22	34	-12
LatentSpace_v5	Taenia tecta	14	28	-14
LatentSpace_v5	Cortical amygdalar area	6	19	-13
LatentSpace_v5	Piriform-amygdalar area	6	28	-22
LatentSpace_v5	Main olfactory bulb	21	10	11
LatentSpace_v5	Accessory olfactory bulb	34	19	15
LatentSpace_v5	Anterior olfactory nucleus	29	32	-3
LatentSpace_v5	Subiculum	3	35	-32
LatentSpace_v5	Entorhinal area	13	22	-9
LatentSpace_v5	Field CA1	7	25	-18
LatentSpace_v5	Field CA2	6	14	-8
LatentSpace_v5	Field CA3	5	8	-3
LatentSpace_v5	Dentate gyrus	10	3	7
LatentSpace_v5	Anterior cingulate area	36	39	-3
LatentSpace_v5	Infralimbic area	10	26	-16
LatentSpace_v5	Retrosplenial area	29	36	-7
LatentSpace_v5	Prelimbic area	24	35	-11
LatentSpace_v5	Primary auditory area	37	38	-1
LatentSpace_v5	Dorsal auditory area	35	38	-3
LatentSpace_v5	Ventral auditory area	38	38	0
LatentSpace_v5	Agranular insular area	22	37	-15
LatentSpace_v5	Ectorhinal area	23	33	-10
LatentSpace_v5	Primary motor area	35	38	-3
LatentSpace_v5	Secondary motor area	35	38	-3
LatentSpace_v5	Frontal pole, cerebral cortex	27	40	-13
LatentSpace_v5	Orbital area	25	35	-10
LatentSpace_v5	Posterior parietal association areas	37	38	-1
LatentSpace_v5	Perirhinal area	21	32	-11
LatentSpace_v5	Primary somatosensory area	28	35	-7
LatentSpace_v5	Supplemental somatosensory area	37	38	-1
LatentSpace_v5	Temporal association areas	28	33	-5
LatentSpace_v5	Visual areas	35	38	-3
LatentSpace_v5	Pallidum	10	6	4
LatentSpace_v5	Striatum ventral region	7	3	4
LatentSpace_v5	Lateral septal complex	6	4	2
LatentSpace_v5	Caudoputamen	3	3	0
LatentSpace_v5	Medial amygdalar nucleus	7	7	0
LatentSpace_v5	Hypothalamus	9	9	0
LatentSpace_v5	Thalamus	10	1	9
LatentSpace_v5	Inferior colliculus	5	9	-4
LatentSpace_v5	Superior colliculus, sensory related	5	10	-5
LatentSpace_v5	Midbrain raphe nuclei	16	12	4
LatentSpace_v5	Midbrain-other	12	10	2
LatentSpace_v5	Periaqueductal gray	12	11	1
LatentSpace_v5	Pons	11	9	2
LatentSpace_v5	Medulla	12	9	3
LatentSpace_v5	Lingula (I)	16	34	-18
LatentSpace_v5	Central lobule	20	34	-14
LatentSpace_v5	Culmen	28	34	-6
LatentSpace_v5	Declive (VI)	22	28	-6
LatentSpace_v5	Folium-tuber vermis (VII)	23	31	-8
LatentSpace_v5	Pyramus (VIII)	23	32	-9
LatentSpace_v5	Uvula (IX)	27	34	-7
LatentSpace_v5	Nodulus (X)	30	35	-5
LatentSpace_v5	Simple lobule	23	29	-6
LatentSpace_v5	Crus 1	21	26	-5
LatentSpace_v5	Crus 2	21	27	-6
LatentSpace_v5	Paramedian lobule	23	33	-10
LatentSpace_v5	Copula pyramidis	23	34	-11
LatentSpace_v5	Flocculus	32	34	-2
LatentSpace_v5	Paraflocculus	24	36	-12
LatentSpace_v5	Cerebellar nuclei	33	11	22
LatentSpace_v6	Cortical subplate-other	12	15	-3
LatentSpace_v6	Claustrum	18	33	-15
LatentSpace_v6	Endopiriform nucleus	17	32	-15
LatentSpace_v6	Olfactory areas-other	20	33	-13
LatentSpace_v6	Postpiriform transition area	12	27	-15
LatentSpace_v6	Piriform area	21	34	-13
LatentSpace_v6	Taenia tecta	13	28	-15
LatentSpace_v6	Cortical amygdalar area	9	19	-10
LatentSpace_v6	Piriform-amygdalar area	13	28	-15
LatentSpace_v6	Main olfactory bulb	3	10	-7
LatentSpace_v6	Accessory olfactory bulb	28	19	9
LatentSpace_v6	Anterior olfactory nucleus	17	32	-15
LatentSpace_v6	Subiculum	6	35	-29
LatentSpace_v6	Entorhinal area	13	22	-9
LatentSpace_v6	Field CA1	8	25	-17
LatentSpace_v6	Field CA2	10	14	-4
LatentSpace_v6	Field CA3	6	8	-2
LatentSpace_v6	Dentate gyrus	10	3	7
LatentSpace_v6	Anterior cingulate area	32	39	-7
LatentSpace_v6	Infralimbic area	12	26	-14
LatentSpace_v6	Retrosplenial area	22	36	-14
LatentSpace_v6	Prelimbic area	28	35	-7
LatentSpace_v6	Primary auditory area	36	38	-2
LatentSpace_v6	Dorsal auditory area	35	38	-3
LatentSpace_v6	Ventral auditory area	34	38	-4
LatentSpace_v6	Agranular insular area	25	37	-12
LatentSpace_v6	Ectorhinal area	22	33	-11
LatentSpace_v6	Primary motor area	33	38	-5
LatentSpace_v6	Secondary motor area	34	38	-4
LatentSpace_v6	Frontal pole, cerebral cortex	33	40	-7
LatentSpace_v6	Orbital area	29	35	-6
LatentSpace_v6	Posterior parietal association areas	33	38	-5
LatentSpace_v6	Perirhinal area	18	32	-14
LatentSpace_v6	Primary somatosensory area	26	35	-9
LatentSpace_v6	Supplemental somatosensory area	37	38	-1
LatentSpace_v6	Temporal association areas	28	33	-5
LatentSpace_v6	Visual areas	31	38	-7
LatentSpace_v6	Pallidum	7	6	1
LatentSpace_v6	Striatum ventral region	6	3	3
LatentSpace_v6	Lateral septal complex	13	4	9
LatentSpace_v6	Caudoputamen	3	3	0
LatentSpace_v6	Medial amygdalar nucleus	9	7	2
LatentSpace_v6	Hypothalamus	9	9	0
LatentSpace_v6	Thalamus	12	1	11
LatentSpace_v6	Inferior colliculus	4	9	-5
LatentSpace_v6	Superior colliculus, sensory related	6	10	-4
LatentSpace_v6	Midbrain raphe nuclei	15	12	3
LatentSpace_v6	Midbrain-other	12	10	2
LatentSpace_v6	Periaqueductal gray	13	11	2
LatentSpace_v6	Pons	11	9	2
LatentSpace_v6	Medulla	12	9	3
LatentSpace_v6	Lingula (I)	17	34	-17
LatentSpace_v6	Central lobule	28	34	-6
LatentSpace_v6	Culmen	26	34	-8
LatentSpace_v6	Declive (VI)	24	28	-4
LatentSpace_v6	Folium-tuber vermis (VII)	26	31	-5
LatentSpace_v6	Pyramus (VIII)	32	32	0
LatentSpace_v6	Uvula (IX)	22	34	-12
LatentSpace_v6	Nodulus (X)	16	35	-19
LatentSpace_v6	Simple lobule	23	29	-6
LatentSpace_v6	Crus 1	23	26	-3
LatentSpace_v6	Crus 2	23	27	-4
LatentSpace_v6	Paramedian lobule	27	33	-6
LatentSpace_v6	Copula pyramidis	34	34	0
LatentSpace_v6	Flocculus	32	34	-2
LatentSpace_v6	Paraflocculus	34	36	-2
LatentSpace_v6	Cerebellar nuclei	33	11	22
LatentSpace_v7	Cortical subplate-other	4	15	-11
LatentSpace_v7	Claustrum	28	33	-5
LatentSpace_v7	Endopiriform nucleus	10	32	-22
LatentSpace_v7	Olfactory areas-other	16	33	-17
LatentSpace_v7	Postpiriform transition area	6	27	-21
LatentSpace_v7	Piriform area	10	34	-24
LatentSpace_v7	Taenia tecta	11	28	-17
LatentSpace_v7	Cortical amygdalar area	3	19	-16
LatentSpace_v7	Piriform-amygdalar area	6	28	-22
LatentSpace_v7	Main olfactory bulb	46	10	36
LatentSpace_v7	Accessory olfactory bulb	41	19	22
LatentSpace_v7	Anterior olfactory nucleus	26	32	-6
LatentSpace_v7	Subiculum	8	35	-27
LatentSpace_v7	Entorhinal area	8	22	-14
LatentSpace_v7	Field CA1	9	25	-16
LatentSpace_v7	Field CA2	6	14	-8
LatentSpace_v7	Field CA3	6	8	-2
LatentSpace_v7	Dentate gyrus	7	3	4
LatentSpace_v7	Anterior cingulate area	37	39	-2
LatentSpace_v7	Infralimbic area	9	26	-17
LatentSpace_v7	Retrosplenial area	27	36	-9
LatentSpace_v7	Prelimbic area	31	35	-4
LatentSpace_v7	Primary auditory area	35	38	-3
LatentSpace_v7	Dorsal auditory area	35	38	-3
LatentSpace_v7	Ventral auditory area	37	38	-1
LatentSpace_v7	Agranular insular area	23	37	-14
LatentSpace_v7	Ectorhinal area	23	33	-10
LatentSpace_v7	Primary motor area	35	38	-3
LatentSpace_v7	Secondary motor area	36	38	-2
LatentSpace_v7	Frontal pole, cerebral cortex	36	40	-4
LatentSpace_v7	Orbital area	26	35	-9
LatentSpace_v7	Posterior parietal association areas	35	38	-3
LatentSpace_v7	Perirhinal area	15	32	-17
LatentSpace_v7	Primary somatosensory area	30	35	-5
LatentSpace_v7	Supplemental somatosensory area	38	38	0
LatentSpace_v7	Temporal association areas	30	33	-3
LatentSpace_v7	Visual areas	35	38	-3
LatentSpace_v7	Pallidum	9	6	3
LatentSpace_v7	Striatum ventral region	3	3	0
LatentSpace_v7	Lateral septal complex	3	4	-1
LatentSpace_v7	Caudoputamen	3	3	0
LatentSpace_v7	Medial amygdalar nucleus	7	7	0
LatentSpace_v7	Hypothalamus	12	9	3
LatentSpace_v7	Thalamus	10	1	9
LatentSpace_v7	Inferior colliculus	10	9	1
LatentSpace_v7	Superior colliculus, sensory related	5	10	-5
LatentSpace_v7	Midbrain raphe nuclei	14	12	2
LatentSpace_v7	Midbrain-other	11	10	1
LatentSpace_v7	Periaqueductal gray	10	11	-1
LatentSpace_v7	Pons	10	9	1
LatentSpace_v7	Medulla	7	9	-2
LatentSpace_v7	Lingula (I)	13	34	-21
LatentSpace_v7	Central lobule	9	34	-25
LatentSpace_v7	Culmen	24	34	-10
LatentSpace_v7	Declive (VI)	22	28	-6
LatentSpace_v7	Folium-tuber vermis (VII)	23	31	-8
LatentSpace_v7	Pyramus (VIII)	24	32	-8
LatentSpace_v7	Uvula (IX)	22	34	-12
LatentSpace_v7	Nodulus (X)	12	35	-23
LatentSpace_v7	Simple lobule	23	29	-6
LatentSpace_v7	Crus 1	21	26	-5
LatentSpace_v7	Crus 2	21	27	-6
LatentSpace_v7	Paramedian lobule	23	33	-10
LatentSpace_v7	Copula pyramidis	27	34	-7
LatentSpace_v7	Flocculus	32	34	-2
LatentSpace_v7	Paraflocculus	24	36	-12
LatentSpace_v7	Cerebellar nuclei	12	11	1
LatentSpace_v8	Cortical subplate-other	7	15	-8
LatentSpace_v8	Claustrum	24	33	-9
LatentSpace_v8	Endopiriform nucleus	6	32	-26
LatentSpace_v8	Olfactory areas-other	7	33	-26
LatentSpace_v8	Postpiriform transition area	5	27	-22
LatentSpace_v8	Piriform area	5	34	-29
LatentSpace_v8	Taenia tecta	10	28	-18
LatentSpace_v8	Cortical amygdalar area	4	19	-15
LatentSpace_v8	Piriform-amygdalar area	4	28	-24
LatentSpace_v8	Main olfactory bulb	12	10	2
LatentSpace_v8	Accessory olfactory bulb	42	19	23
LatentSpace_v8	Anterior olfactory nucleus	6	32	-26
LatentSpace_v8	Subiculum	4	35	-31
LatentSpace_v8	Entorhinal area	7	22	-15
LatentSpace_v8	Field CA1	7	25	-18
LatentSpace_v8	Field CA2	25	14	11
LatentSpace_v8	Field CA3	6	8	-2
LatentSpace_v8	Dentate gyrus	6	3	3
LatentSpace_v8	Anterior cingulate area	38	39	-1
LatentSpace_v8	Infralimbic area	11	26	-15
LatentSpace_v8	Retrosplenial area	35	36	-1
LatentSpace_v8	Prelimbic area	32	35	-3
LatentSpace_v8	Primary auditory area	38	38	0
LatentSpace_v8	Dorsal auditory area	36	38	-2
LatentSpace_v8	Ventral auditory area	39	38	1
LatentSpace_v8	Agranular insular area	21	37	-16
LatentSpace_v8	Ectorhinal area	23	33	-10
LatentSpace_v8	Primary motor area	36	38	-2
LatentSpace_v8	Secondary motor area	38	38	0
LatentSpace_v8	Frontal pole, cerebral cortex	36	40	-4
LatentSpace_v8	Orbital area	27	35	-8
LatentSpace_v8	Posterior parietal association areas	36	38	-2
LatentSpace_v8	Perirhinal area	20	32	-12
LatentSpace_v8	Primary somatosensory area	35	35	0
LatentSpace_v8	Supplemental somatosensory area	37	38	-1
LatentSpace_v8	Temporal association areas	30	33	-3
LatentSpace_v8	Visual areas	36	38	-2
LatentSpace_v8	Pallidum	10	6	4
LatentSpace_v8	Striatum ventral region	7	3	4
LatentSpace_v8	Lateral septal complex	7	4	3
LatentSpace_v8	Caudoputamen	3	3	0
LatentSpace_v8	Medial amygdalar nucleus	8	7	1
LatentSpace_v8	Hypothalamus	9	9	0
LatentSpace_v8	Thalamus	6	1	5
LatentSpace_v8	Inferior colliculus	7	9	-2
LatentSpace_v8	Superior colliculus, sensory related	5	10	-5
LatentSpace_v8	Midbrain raphe nuclei	14	12	2
LatentSpace_v8	Midbrain-other	10	10	0
LatentSpace_v8	Periaqueductal gray	9	11	-2
LatentSpace_v8	Pons	10	9	1
LatentSpace_v8	Medulla	12	9	3
LatentSpace_v8	Lingula (I)	16	34	-18
LatentSpace_v8	Central lobule	25	34	-9
LatentSpace_v8	Culmen	23	34	-11
LatentSpace_v8	Declive (VI)	23	28	-5
LatentSpace_v8	Folium-tuber vermis (VII)	23	31	-8
LatentSpace_v8	Pyramus (VIII)	23	32	-9
LatentSpace_v8	Uvula (IX)	32	34	-2
LatentSpace_v8	Nodulus (X)	20	35	-15
LatentSpace_v8	Simple lobule	23	29	-6
LatentSpace_v8	Crus 1	22	26	-4
LatentSpace_v8	Crus 2	22	27	-5
LatentSpace_v8	Paramedian lobule	23	33	-10
LatentSpace_v8	Copula pyramidis	26	34	-8
LatentSpace_v8	Flocculus	17	34	-17
LatentSpace_v8	Paraflocculus	32	36	-4
LatentSpace_v8	Cerebellar nuclei	16	11	5
LatentSpace_v9	Cortical subplate-other	13	15	-2
LatentSpace_v9	Claustrum	28	33	-5
LatentSpace_v9	Endopiriform nucleus	17	32	-15
LatentSpace_v9	Olfactory areas-other	17	33	-16
LatentSpace_v9	Postpiriform transition area	11	27	-16
LatentSpace_v9	Piriform area	19	34	-15
LatentSpace_v9	Taenia tecta	13	28	-15
LatentSpace_v9	Cortical amygdalar area	11	19	-8
LatentSpace_v9	Piriform-amygdalar area	10	28	-18
LatentSpace_v9	Main olfactory bulb	41	10	31
LatentSpace_v9	Accessory olfactory bulb	53	19	34
LatentSpace_v9	Anterior olfactory nucleus	12	32	-20
LatentSpace_v9	Subiculum	5	35	-30
LatentSpace_v9	Entorhinal area	6	22	-16
LatentSpace_v9	Field CA1	7	25	-18
LatentSpace_v9	Field CA2	17	14	3
LatentSpace_v9	Field CA3	6	8	-2
LatentSpace_v9	Dentate gyrus	7	3	4
LatentSpace_v9	Anterior cingulate area	34	39	-5
LatentSpace_v9	Infralimbic area	12	26	-14
LatentSpace_v9	Retrosplenial area	26	36	-10
LatentSpace_v9	Prelimbic area	25	35	-10
LatentSpace_v9	Primary auditory area	37	38	-1
LatentSpace_v9	Dorsal auditory area	35	38	-3
LatentSpace_v9	Ventral auditory area	37	38	-1
LatentSpace_v9	Agranular insular area	17	37	-20
LatentSpace_v9	Ectorhinal area	23	33	-10
LatentSpace_v9	Primary motor area	35	38	-3
LatentSpace_v9	Secondary motor area	36	38	-2
LatentSpace_v9	Frontal pole, cerebral cortex	27	40	-13
LatentSpace_v9	Orbital area	24	35	-11
LatentSpace_v9	Posterior parietal association areas	35	38	-3
LatentSpace_v9	Perirhinal area	17	32	-15
LatentSpace_v9	Primary somatosensory area	31	35	-4
LatentSpace_v9	Supplemental somatosensory area	38	38	0
LatentSpace_v9	Temporal association areas	32	33	-1
LatentSpace_v9	Visual areas	35	38	-3
LatentSpace_v9	Pallidum	14	6	8
LatentSpace_v9	Striatum ventral region	11	3	8
LatentSpace_v9	Lateral septal complex	13	4	9
LatentSpace_v9	Caudoputamen	3	3	0
LatentSpace_v9	Medial amygdalar nucleus	13	7	6
LatentSpace_v9	Hypothalamus	10	9	1
LatentSpace_v9	Thalamus	2	1	1
LatentSpace_v9	Inferior colliculus	4	9	-5
LatentSpace_v9	Superior colliculus, sensory related	4	10	-6
LatentSpace_v9	Midbrain raphe nuclei	14	12	2
LatentSpace_v9	Midbrain-other	9	10	-1
LatentSpace_v9	Periaqueductal gray	10	11	-1
LatentSpace_v9	Pons	11	9	2
LatentSpace_v9	Medulla	9	9	0
LatentSpace_v9	Lingula (I)	9	34	-25
LatentSpace_v9	Central lobule	5	34	-29
LatentSpace_v9	Culmen	28	34	-6
LatentSpace_v9	Declive (VI)	23	28	-5
LatentSpace_v9	Folium-tuber vermis (VII)	23	31	-8
LatentSpace_v9	Pyramus (VIII)	23	32	-9
LatentSpace_v9	Uvula (IX)	15	34	-19
LatentSpace_v9	Nodulus (X)	13	35	-22
LatentSpace_v9	Simple lobule	22	29	-7
LatentSpace_v9	Crus 1	22	26	-4
LatentSpace_v9	Crus 2	23	27	-4
LatentSpace_v9	Paramedian lobule	23	33	-10
LatentSpace_v9	Copula pyramidis	23	34	-11
LatentSpace_v9	Flocculus	25	34	-9
LatentSpace_v9	Paraflocculus	23	36	-13
LatentSpace_v9	Cerebellar nuclei	7	11	-4
LatentSpace_v10	Cortical subplate-other	12	15	-3
LatentSpace_v10	Claustrum	28	33	-5
LatentSpace_v10	Endopiriform nucleus	11	32	-21
LatentSpace_v10	Olfactory areas-other	15	33	-18
LatentSpace_v10	Postpiriform transition area	12	27	-15
LatentSpace_v10	Piriform area	17	34	-17
LatentSpace_v10	Taenia tecta	13	28	-15
LatentSpace_v10	Cortical amygdalar area	9	19	-10
LatentSpace_v10	Piriform-amygdalar area	12	28	-16
LatentSpace_v10	Main olfactory bulb	24	10	14
LatentSpace_v10	Accessory olfactory bulb	53	19	34
LatentSpace_v10	Anterior olfactory nucleus	21	32	-11
LatentSpace_v10	Subiculum	5	35	-30
LatentSpace_v10	Entorhinal area	8	22	-14
LatentSpace_v10	Field CA1	7	25	-18
LatentSpace_v10	Field CA2	8	14	-6
LatentSpace_v10	Field CA3	9	8	1
LatentSpace_v10	Dentate gyrus	10	3	7
LatentSpace_v10	Anterior cingulate area	36	39	-3
LatentSpace_v10	Infralimbic area	13	26	-13
LatentSpace_v10	Retrosplenial area	27	36	-9
LatentSpace_v10	Prelimbic area	27	35	-8
LatentSpace_v10	Primary auditory area	37	38	-1
LatentSpace_v10	Dorsal auditory area	35	38	-3
LatentSpace_v10	Ventral auditory area	39	38	1
LatentSpace_v10	Agranular insular area	23	37	-14
LatentSpace_v10	Ectorhinal area	25	33	-8
LatentSpace_v10	Primary motor area	36	38	-2
LatentSpace_v10	Secondary motor area	36	38	-2
LatentSpace_v10	Frontal pole, cerebral cortex	30	40	-10
LatentSpace_v10	Orbital area	24	35	-11
LatentSpace_v10	Posterior parietal association areas	35	38	-3
LatentSpace_v10	Perirhinal area	16	32	-16
LatentSpace_v10	Primary somatosensory area	33	35	-2
LatentSpace_v10	Supplemental somatosensory area	37	38	-1
LatentSpace_v10	Temporal association areas	34	33	1
LatentSpace_v10	Visual areas	35	38	-3
LatentSpace_v10	Pallidum	8	6	2
LatentSpace_v10	Striatum ventral region	8	3	5
LatentSpace_v10	Lateral septal complex	12	4	8
LatentSpace_v10	Caudoputamen	3	3	0
LatentSpace_v10	Medial amygdalar nucleus	12	7	5
LatentSpace_v10	Hypothalamus	17	9	8
LatentSpace_v10	Thalamus	10	1	9
LatentSpace_v10	Inferior colliculus	7	9	-2
LatentSpace_v10	Superior colliculus, sensory related	8	10	-2
LatentSpace_v10	Midbrain raphe nuclei	14	12	2
LatentSpace_v10	Midbrain-other	14	10	4
LatentSpace_v10	Periaqueductal gray	13	11	2
LatentSpace_v10	Pons	12	9	3
LatentSpace_v10	Medulla	13	9	4
LatentSpace_v10	Lingula (I)	13	34	-21
LatentSpace_v10	Central lobule	26	34	-8
LatentSpace_v10	Culmen	25	34	-9
LatentSpace_v10	Declive (VI)	23	28	-5
LatentSpace_v10	Folium-tuber vermis (VII)	23	31	-8
LatentSpace_v10	Pyramus (VIII)	23	32	-9
LatentSpace_v10	Uvula (IX)	26	34	-8
LatentSpace_v10	Nodulus (X)	15	35	-20
LatentSpace_v10	Simple lobule	22	29	-7
LatentSpace_v10	Crus 1	22	26	-4
LatentSpace_v10	Crus 2	22	27	-5
LatentSpace_v10	Paramedian lobule	23	33	-10
LatentSpace_v10	Copula pyramidis	23	34	-11
LatentSpace_v10	Flocculus	17	34	-17
LatentSpace_v10	Paraflocculus	23	36	-13
LatentSpace_v10	Cerebellar nuclei	17	11	6
LatentSpace_v11	Cortical subplate-other	12	15	-3
LatentSpace_v11	Claustrum	27	33	-6
LatentSpace_v11	Endopiriform nucleus	12	32	-20
LatentSpace_v11	Olfactory areas-other	9	33	-24
LatentSpace_v11	Postpiriform transition area	12	27	-15
LatentSpace_v11	Piriform area	10	34	-24
LatentSpace_v11	Taenia tecta	15	28	-13
LatentSpace_v11	Cortical amygdalar area	10	19	-9
LatentSpace_v11	Piriform-amygdalar area	8	28	-20
LatentSpace_v11	Main olfactory bulb	6	10	-4
LatentSpace_v11	Accessory olfactory bulb	4	19	-15
LatentSpace_v11	Anterior olfactory nucleus	11	32	-21
LatentSpace_v11	Subiculum	7	35	-28
LatentSpace_v11	Entorhinal area	12	22	-10
LatentSpace_v11	Field CA1	8	25	-17
LatentSpace_v11	Field CA2	6	14	-8
LatentSpace_v11	Field CA3	5	8	-3
LatentSpace_v11	Dentate gyrus	7	3	4
LatentSpace_v11	Anterior cingulate area	35	39	-4
LatentSpace_v11	Infralimbic area	12	26	-14
LatentSpace_v11	Retrosplenial area	23	36	-13
LatentSpace_v11	Prelimbic area	25	35	-10
LatentSpace_v11	Primary auditory area	35	38	-3
LatentSpace_v11	Dorsal auditory area	35	38	-3
LatentSpace_v11	Ventral auditory area	38	38	0
LatentSpace_v11	Agranular insular area	22	37	-15
LatentSpace_v11	Ectorhinal area	24	33	-9
LatentSpace_v11	Primary motor area	35	38	-3
LatentSpace_v11	Secondary motor area	35	38	-3
LatentSpace_v11	Frontal pole, cerebral cortex	34	40	-6
LatentSpace_v11	Orbital area	24	35	-11
LatentSpace_v11	Posterior parietal association areas	35	38	-3
LatentSpace_v11	Perirhinal area	21	32	-11
LatentSpace_v11	Primary somatosensory area	30	35	-5
LatentSpace_v11	Supplemental somatosensory area	36	38	-2
LatentSpace_v11	Temporal association areas	33	33	0
LatentSpace_v11	Visual areas	35	38	-3
LatentSpace_v11	Pallidum	9	6	3
LatentSpace_v11	Striatum ventral region	5	3	2
LatentSpace_v11	Lateral septal complex	8	4	4
LatentSpace_v11	Caudoputamen	3	3	0
LatentSpace_v11	Medial amygdalar nucleus	11	7	4
LatentSpace_v11	Hypothalamus	7	9	-2
LatentSpace_v11	Thalamus	2	1	1
LatentSpace_v11	Inferior colliculus	9	9	0
LatentSpace_v11	Superior colliculus, sensory related	8	10	-2
LatentSpace_v11	Midbrain raphe nuclei	14	12	2
LatentSpace_v11	Midbrain-other	12	10	2
LatentSpace_v11	Periaqueductal gray	13	11	2
LatentSpace_v11	Pons	9	9	0
LatentSpace_v11	Medulla	9	9	0
LatentSpace_v11	Lingula (I)	22	34	-12
LatentSpace_v11	Central lobule	31	34	-3
LatentSpace_v11	Culmen	28	34	-6
LatentSpace_v11	Declive (VI)	24	28	-4
LatentSpace_v11	Folium-tuber vermis (VII)	24	31	-7
LatentSpace_v11	Pyramus (VIII)	25	32	-7
LatentSpace_v11	Uvula (IX)	34	34	0
LatentSpace_v11	Nodulus (X)	23	35	-12
LatentSpace_v11	Simple lobule	23	29	-6
LatentSpace_v11	Crus 1	23	26	-3
LatentSpace_v11	Crus 2	22	27	-5
LatentSpace_v11	Paramedian lobule	23	33	-10
LatentSpace_v11	Copula pyramidis	25	34	-9
LatentSpace_v11	Flocculus	28	34	-6
LatentSpace_v11	Paraflocculus	23	36	-13
LatentSpace_v11	Cerebellar nuclei	31	11	20
LatentSpace_v12	Cortical subplate-other	9	15	-6
LatentSpace_v12	Claustrum	26	33	-7
LatentSpace_v12	Endopiriform nucleus	14	32	-18
LatentSpace_v12	Olfactory areas-other	17	33	-16
LatentSpace_v12	Postpiriform transition area	12	27	-15
LatentSpace_v12	Piriform area	15	34	-19
LatentSpace_v12	Taenia tecta	10	28	-18
LatentSpace_v12	Cortical amygdalar area	10	19	-9
LatentSpace_v12	Piriform-amygdalar area	9	28	-19
LatentSpace_v12	Main olfactory bulb	12	10	2
LatentSpace_v12	Accessory olfactory bulb	33	19	14
LatentSpace_v12	Anterior olfactory nucleus	13	32	-19
LatentSpace_v12	Subiculum	4	35	-31
LatentSpace_v12	Entorhinal area	16	22	-6
LatentSpace_v12	Field CA1	8	25	-17
LatentSpace_v12	Field CA2	7	14	-7
LatentSpace_v12	Field CA3	8	8	0
LatentSpace_v12	Dentate gyrus	10	3	7
LatentSpace_v12	Anterior cingulate area	33	39	-6
LatentSpace_v12	Infralimbic area	12	26	-14
LatentSpace_v12	Retrosplenial area	23	36	-13
LatentSpace_v12	Prelimbic area	25	35	-10
LatentSpace_v12	Primary auditory area	35	38	-3
LatentSpace_v12	Dorsal auditory area	31	38	-7
LatentSpace_v12	Ventral auditory area	31	38	-7
LatentSpace_v12	Agranular insular area	16	37	-21
LatentSpace_v12	Ectorhinal area	24	33	-9
LatentSpace_v12	Primary motor area	32	38	-6
LatentSpace_v12	Secondary motor area	35	38	-3
LatentSpace_v12	Frontal pole, cerebral cortex	28	40	-12
LatentSpace_v12	Orbital area	19	35	-16
LatentSpace_v12	Posterior parietal association areas	33	38	-5
LatentSpace_v12	Perirhinal area	18	32	-14
LatentSpace_v12	Primary somatosensory area	25	35	-10
LatentSpace_v12	Supplemental somatosensory area	35	38	-3
LatentSpace_v12	Temporal association areas	26	33	-7
LatentSpace_v12	Visual areas	31	38	-7
LatentSpace_v12	Pallidum	7	6	1
LatentSpace_v12	Striatum ventral region	7	3	4
LatentSpace_v12	Lateral septal complex	11	4	7
LatentSpace_v12	Caudoputamen	3	3	0
LatentSpace_v12	Medial amygdalar nucleus	10	7	3
LatentSpace_v12	Hypothalamus	5	9	-4
LatentSpace_v12	Thalamus	11	1	10
LatentSpace_v12	Inferior colliculus	4	9	-5
LatentSpace_v12	Superior colliculus, sensory related	5	10	-5
LatentSpace_v12	Midbrain raphe nuclei	12	12	0
LatentSpace_v12	Midbrain-other	10	10	0
LatentSpace_v12	Periaqueductal gray	6	11	-5
LatentSpace_v12	Pons	10	9	1
LatentSpace_v12	Medulla	13	9	4
LatentSpace_v12	Lingula (I)	11	34	-23
LatentSpace_v12	Central lobule	13	34	-21
LatentSpace_v12	Culmen	24	34	-10
LatentSpace_v12	Declive (VI)	24	28	-4
LatentSpace_v12	Folium-tuber vermis (VII)	30	31	-1
LatentSpace_v12	Pyramus (VIII)	33	32	1
LatentSpace_v12	Uvula (IX)	33	34	-1
LatentSpace_v12	Nodulus (X)	21	35	-14
LatentSpace_v12	Simple lobule	22	29	-7
LatentSpace_v12	Crus 1	22	26	-4
LatentSpace_v12	Crus 2	23	27	-4
LatentSpace_v12	Paramedian lobule	25	33	-8
LatentSpace_v12	Copula pyramidis	31	34	-3
LatentSpace_v12	Flocculus	34	34	0
LatentSpace_v12	Paraflocculus	28	36	-8
LatentSpace_v12	Cerebellar nuclei	19	11	8
LatentSpace_v13	Cortical subplate-other	10	15	-5
LatentSpace_v13	Claustrum	22	33	-11
LatentSpace_v13	Endopiriform nucleus	11	32	-21
LatentSpace_v13	Olfactory areas-other	14	33	-19
LatentSpace_v13	Postpiriform transition area	8	27	-19
LatentSpace_v13	Piriform area	15	34	-19
LatentSpace_v13	Taenia tecta	13	28	-15
LatentSpace_v13	Cortical amygdalar area	7	19	-12
LatentSpace_v13	Piriform-amygdalar area	6	28	-22
LatentSpace_v13	Main olfactory bulb	23	10	13
LatentSpace_v13	Accessory olfactory bulb	21	19	2
LatentSpace_v13	Anterior olfactory nucleus	12	32	-20
LatentSpace_v13	Subiculum	4	35	-31
LatentSpace_v13	Entorhinal area	10	22	-12
LatentSpace_v13	Field CA1	8	25	-17
LatentSpace_v13	Field CA2	10	14	-4
LatentSpace_v13	Field CA3	7	8	-1
LatentSpace_v13	Dentate gyrus	7	3	4
LatentSpace_v13	Anterior cingulate area	35	39	-4
LatentSpace_v13	Infralimbic area	12	26	-14
LatentSpace_v13	Retrosplenial area	24	36	-12
LatentSpace_v13	Prelimbic area	27	35	-8
LatentSpace_v13	Primary auditory area	36	38	-2
LatentSpace_v13	Dorsal auditory area	35	38	-3
LatentSpace_v13	Ventral auditory area	37	38	-1
LatentSpace_v13	Agranular insular area	24	37	-13
LatentSpace_v13	Ectorhinal area	23	33	-10
LatentSpace_v13	Primary motor area	35	38	-3
LatentSpace_v13	Secondary motor area	36	38	-2
LatentSpace_v13	Frontal pole, cerebral cortex	35	40	-5
LatentSpace_v13	Orbital area	24	35	-11
LatentSpace_v13	Posterior parietal association areas	35	38	-3
LatentSpace_v13	Perirhinal area	19	32	-13
LatentSpace_v13	Primary somatosensory area	29	35	-6
LatentSpace_v13	Supplemental somatosensory area	36	38	-2
LatentSpace_v13	Temporal association areas	30	33	-3
LatentSpace_v13	Visual areas	32	38	-6
LatentSpace_v13	Pallidum	8	6	2
LatentSpace_v13	Striatum ventral region	5	3	2
LatentSpace_v13	Lateral septal complex	10	4	6
LatentSpace_v13	Caudoputamen	3	3	0
LatentSpace_v13	Medial amygdalar nucleus	11	7	4
LatentSpace_v13	Hypothalamus	8	9	-1
LatentSpace_v13	Thalamus	3	1	2
LatentSpace_v13	Inferior colliculus	5	9	-4
LatentSpace_v13	Superior colliculus, sensory related	4	10	-6
LatentSpace_v13	Midbrain raphe nuclei	14	12	2
LatentSpace_v13	Midbrain-other	12	10	2
LatentSpace_v13	Periaqueductal gray	11	11	0
LatentSpace_v13	Pons	10	9	1
LatentSpace_v13	Medulla	9	9	0
LatentSpace_v13	Lingula (I)	13	34	-21
LatentSpace_v13	Central lobule	10	34	-24
LatentSpace_v13	Culmen	27	34	-7
LatentSpace_v13	Declive (VI)	23	28	-5
LatentSpace_v13	Folium-tuber vermis (VII)	24	31	-7
LatentSpace_v13	Pyramus (VIII)	30	32	-2
LatentSpace_v13	Uvula (IX)	20	34	-14
LatentSpace_v13	Nodulus (X)	14	35	-21
LatentSpace_v13	Simple lobule	23	29	-6
LatentSpace_v13	Crus 1	22	26	-4
LatentSpace_v13	Crus 2	22	27	-5
LatentSpace_v13	Paramedian lobule	23	33	-10
LatentSpace_v13	Copula pyramidis	25	34	-9
LatentSpace_v13	Flocculus	19	34	-15
LatentSpace_v13	Paraflocculus	24	36	-12
LatentSpace_v13	Cerebellar nuclei	13	11	2
LatentSpace_v14	Cortical subplate-other	8	15	-7
LatentSpace_v14	Claustrum	19	33	-14
LatentSpace_v14	Endopiriform nucleus	7	32	-25
LatentSpace_v14	Olfactory areas-other	10	33	-23
LatentSpace_v14	Postpiriform transition area	7	27	-20
LatentSpace_v14	Piriform area	10	34	-24
LatentSpace_v14	Taenia tecta	11	28	-17
LatentSpace_v14	Cortical amygdalar area	6	19	-13
LatentSpace_v14	Piriform-amygdalar area	9	28	-19
LatentSpace_v14	Main olfactory bulb	32	10	22
LatentSpace_v14	Accessory olfactory bulb	24	19	5
LatentSpace_v14	Anterior olfactory nucleus	9	32	-23
LatentSpace_v14	Subiculum	3	35	-32
LatentSpace_v14	Entorhinal area	9	22	-13
LatentSpace_v14	Field CA1	2	25	-23
LatentSpace_v14	Field CA2	6	14	-8
LatentSpace_v14	Field CA3	5	8	-3
LatentSpace_v14	Dentate gyrus	7	3	4
LatentSpace_v14	Anterior cingulate area	38	39	-1
LatentSpace_v14	Infralimbic area	10	26	-16
LatentSpace_v14	Retrosplenial area	25	36	-11
LatentSpace_v14	Prelimbic area	23	35	-12
LatentSpace_v14	Primary auditory area	38	38	0
LatentSpace_v14	Dorsal auditory area	36	38	-2
LatentSpace_v14	Ventral auditory area	39	38	1
LatentSpace_v14	Agranular insular area	19	37	-18
LatentSpace_v14	Ectorhinal area	19	33	-14
LatentSpace_v14	Primary motor area	35	38	-3
LatentSpace_v14	Secondary motor area	36	38	-2
LatentSpace_v14	Frontal pole, cerebral cortex	30	40	-10
LatentSpace_v14	Orbital area	23	35	-12
LatentSpace_v14	Posterior parietal association areas	35	38	-3
LatentSpace_v14	Perirhinal area	12	32	-20
LatentSpace_v14	Primary somatosensory area	35	35	0
LatentSpace_v14	Supplemental somatosensory area	39	38	1
LatentSpace_v14	Temporal association areas	29	33	-4
LatentSpace_v14	Visual areas	35	38	-3
LatentSpace_v14	Pallidum	7	6	1
LatentSpace_v14	Striatum ventral region	7	3	4
LatentSpace_v14	Lateral septal complex	7	4	3
LatentSpace_v14	Caudoputamen	3	3	0
LatentSpace_v14	Medial amygdalar nucleus	7	7	0
LatentSpace_v14	Hypothalamus	5	9	-4
LatentSpace_v14	Thalamus	8	1	7
LatentSpace_v14	Inferior colliculus	6	9	-3
LatentSpace_v14	Superior colliculus, sensory related	5	10	-5
LatentSpace_v14	Midbrain raphe nuclei	14	12	2
LatentSpace_v14	Midbrain-other	9	10	-1
LatentSpace_v14	Periaqueductal gray	10	11	-1
LatentSpace_v14	Pons	8	9	-1
LatentSpace_v14	Medulla	10	9	1
LatentSpace_v14	Lingula (I)	11	34	-23
LatentSpace_v14	Central lobule	10	34	-24
LatentSpace_v14	Culmen	29	34	-5
LatentSpace_v14	Declive (VI)	22	28	-6
LatentSpace_v14	Folium-tuber vermis (VII)	23	31	-8
LatentSpace_v14	Pyramus (VIII)	23	32	-9
LatentSpace_v14	Uvula (IX)	22	34	-12
LatentSpace_v14	Nodulus (X)	15	35	-20
LatentSpace_v14	Simple lobule	23	29	-6
LatentSpace_v14	Crus 1	22	26	-4
LatentSpace_v14	Crus 2	22	27	-5
LatentSpace_v14	Paramedian lobule	23	33	-10
LatentSpace_v14	Copula pyramidis	24	34	-10
LatentSpace_v14	Flocculus	18	34	-16
LatentSpace_v14	Paraflocculus	23	36	-13
LatentSpace_v14	Cerebellar nuclei	13	11	2
LatentSpace_v15	Cortical subplate-other	12	15	-3
LatentSpace_v15	Claustrum	23	33	-10
LatentSpace_v15	Endopiriform nucleus	8	32	-24
LatentSpace_v15	Olfactory areas-other	12	33	-21
LatentSpace_v15	Postpiriform transition area	11	27	-16
LatentSpace_v15	Piriform area	16	34	-18
LatentSpace_v15	Taenia tecta	12	28	-16
LatentSpace_v15	Cortical amygdalar area	8	19	-11
LatentSpace_v15	Piriform-amygdalar area	7	28	-21
LatentSpace_v15	Main olfactory bulb	34	10	24
LatentSpace_v15	Accessory olfactory bulb	55	19	36
LatentSpace_v15	Anterior olfactory nucleus	10	32	-22
LatentSpace_v15	Subiculum	4	35	-31
LatentSpace_v15	Entorhinal area	9	22	-13
LatentSpace_v15	Field CA1	7	25	-18
LatentSpace_v15	Field CA2	7	14	-7
LatentSpace_v15	Field CA3	6	8	-2
LatentSpace_v15	Dentate gyrus	8	3	5
LatentSpace_v15	Anterior cingulate area	37	39	-2
LatentSpace_v15	Infralimbic area	13	26	-13
LatentSpace_v15	Retrosplenial area	32	36	-4
LatentSpace_v15	Prelimbic area	27	35	-8
LatentSpace_v15	Primary auditory area	37	38	-1
LatentSpace_v15	Dorsal auditory area	35	38	-3
LatentSpace_v15	Ventral auditory area	38	38	0
LatentSpace_v15	Agranular insular area	20	37	-17
LatentSpace_v15	Ectorhinal area	22	33	-11
LatentSpace_v15	Primary motor area	35	38	-3
LatentSpace_v15	Secondary motor area	37	38	-1
LatentSpace_v15	Frontal pole, cerebral cortex	29	40	-11
LatentSpace_v15	Orbital area	25	35	-10
LatentSpace_v15	Posterior parietal association areas	35	38	-3
LatentSpace_v15	Perirhinal area	16	32	-16
LatentSpace_v15	Primary somatosensory area	35	35	0
LatentSpace_v15	Supplemental somatosensory area	37	38	-1
LatentSpace_v15	Temporal association areas	29	33	-4
LatentSpace_v15	Visual areas	35	38	-3
LatentSpace_v15	Pallidum	5	6	-1
LatentSpace_v15	Striatum ventral region	5	3	2
LatentSpace_v15	Lateral septal complex	8	4	4
LatentSpace_v15	Caudoputamen	3	3	0
LatentSpace_v15	Medial amygdalar nucleus	10	7	3
LatentSpace_v15	Hypothalamus	6	9	-3
LatentSpace_v15	Thalamus	3	1	2
LatentSpace_v15	Inferior colliculus	5	9	-4
LatentSpace_v15	Superior colliculus, sensory related	5	10	-5
LatentSpace_v15	Midbrain raphe nuclei	10	12	-2
LatentSpace_v15	Midbrain-other	11	10	1
LatentSpace_v15	Periaqueductal gray	9	11	-2
LatentSpace_v15	Pons	9	9	0
LatentSpace_v15	Medulla	15	9	6
LatentSpace_v15	Lingula (I)	13	34	-21
LatentSpace_v15	Central lobule	24	34	-10
LatentSpace_v15	Culmen	27	34	-7
LatentSpace_v15	Declive (VI)	23	28	-5
LatentSpace_v15	Folium-tuber vermis (VII)	23	31	-8
LatentSpace_v15	Pyramus (VIII)	24	32	-8
LatentSpace_v15	Uvula (IX)	24	34	-10
LatentSpace_v15	Nodulus (X)	15	35	-20
LatentSpace_v15	Simple lobule	22	29	-7
LatentSpace_v15	Crus 1	22	26	-4
LatentSpace_v15	Crus 2	22	27	-5
LatentSpace_v15	Paramedian lobule	23	33	-10
LatentSpace_v15	Copula pyramidis	24	34	-10
LatentSpace_v15	Flocculus	27	34	-7
LatentSpace_v15	Paraflocculus	24	36	-12
LatentSpace_v15	Cerebellar nuclei	32	11	21
LatentSpace_v16	Cortical subplate-other	10	15	-5
LatentSpace_v16	Claustrum	22	33	-11
LatentSpace_v16	Endopiriform nucleus	13	32	-19
LatentSpace_v16	Olfactory areas-other	11	33	-22
LatentSpace_v16	Postpiriform transition area	11	27	-16
LatentSpace_v16	Piriform area	18	34	-16
LatentSpace_v16	Taenia tecta	13	28	-15
LatentSpace_v16	Cortical amygdalar area	3	19	-16
LatentSpace_v16	Piriform-amygdalar area	6	28	-22
LatentSpace_v16	Main olfactory bulb	10	10	0
LatentSpace_v16	Accessory olfactory bulb	21	19	2
LatentSpace_v16	Anterior olfactory nucleus	9	32	-23
LatentSpace_v16	Subiculum	3	35	-32
LatentSpace_v16	Entorhinal area	8	22	-14
LatentSpace_v16	Field CA1	7	25	-18
LatentSpace_v16	Field CA2	15	14	1
LatentSpace_v16	Field CA3	6	8	-2
LatentSpace_v16	Dentate gyrus	7	3	4
LatentSpace_v16	Anterior cingulate area	34	39	-5
LatentSpace_v16	Infralimbic area	12	26	-14
LatentSpace_v16	Retrosplenial area	22	36	-14
LatentSpace_v16	Prelimbic area	27	35	-8
LatentSpace_v16	Primary auditory area	35	38	-3
LatentSpace_v16	Dorsal auditory area	35	38	-3
LatentSpace_v16	Ventral auditory area	35	38	-3
LatentSpace_v16	Agranular insular area	24	37	-13
LatentSpace_v16	Ectorhinal area	22	33	-11
LatentSpace_v16	Primary motor area	35	38	-3
LatentSpace_v16	Secondary motor area	35	38	-3
LatentSpace_v16	Frontal pole, cerebral cortex	33	40	-7
LatentSpace_v16	Orbital area	24	35	-11
LatentSpace_v16	Posterior parietal association areas	32	38	-6
LatentSpace_v16	Perirhinal area	14	32	-18
LatentSpace_v16	Primary somatosensory area	31	35	-4
LatentSpace_v16	Supplemental somatosensory area	36	38	-2
LatentSpace_v16	Temporal association areas	28	33	-5
LatentSpace_v16	Visual areas	31	38	-7
LatentSpace_v16	Pallidum	10	6	4
LatentSpace_v16	Striatum ventral region	7	3	4
LatentSpace_v16	Lateral septal complex	10	4	6
LatentSpace_v16	Caudoputamen	3	3	0
LatentSpace_v16	Medial amygdalar nucleus	8	7	1
LatentSpace_v16	Hypothalamus	7	9	-2
LatentSpace_v16	Thalamus	8	1	7
LatentSpace_v16	Inferior colliculus	7	9	-2
LatentSpace_v16	Superior colliculus, sensory related	7	10	-3
LatentSpace_v16	Midbrain raphe nuclei	14	12	2
LatentSpace_v16	Midbrain-other	11	10	1
LatentSpace_v16	Periaqueductal gray	12	11	1
LatentSpace_v16	Pons	10	9	1
LatentSpace_v16	Medulla	9	9	0
LatentSpace_v16	Lingula (I)	13	34	-21
LatentSpace_v16	Central lobule	11	34	-23
LatentSpace_v16	Culmen	28	34	-6
LatentSpace_v16	Declive (VI)	23	28	-5
LatentSpace_v16	Folium-tuber vermis (VII)	24	31	-7
LatentSpace_v16	Pyramus (VIII)	27	32	-5
LatentSpace_v16	Uvula (IX)	13	34	-21
LatentSpace_v16	Nodulus (X)	14	35	-21
LatentSpace_v16	Simple lobule	24	29	-5
LatentSpace_v16	Crus 1	23	26	-3
LatentSpace_v16	Crus 2	23	27	-4
LatentSpace_v16	Paramedian lobule	23	33	-10
LatentSpace_v16	Copula pyramidis	24	34	-10
LatentSpace_v16	Flocculus	11	34	-23
LatentSpace_v16	Paraflocculus	15	36	-21
LatentSpace_v16	Cerebellar nuclei	12	11	1
LatentSpace_v17	Cortical subplate-other	7	15	-8
LatentSpace_v17	Claustrum	15	33	-18
LatentSpace_v17	Endopiriform nucleus	8	32	-24
LatentSpace_v17	Olfactory areas-other	20	33	-13
LatentSpace_v17	Postpiriform transition area	10	27	-17
LatentSpace_v17	Piriform area	10	34	-24
LatentSpace_v17	Taenia tecta	12	28	-16
LatentSpace_v17	Cortical amygdalar area	6	19	-13
LatentSpace_v17	Piriform-amygdalar area	8	28	-20
LatentSpace_v17	Main olfactory bulb	19	10	9
LatentSpace_v17	Accessory olfactory bulb	30	19	11
LatentSpace_v17	Anterior olfactory nucleus	17	32	-15
LatentSpace_v17	Subiculum	6	35	-29
LatentSpace_v17	Entorhinal area	9	22	-13
LatentSpace_v17	Field CA1	6	25	-19
LatentSpace_v17	Field CA2	7	14	-7
LatentSpace_v17	Field CA3	5	8	-3
LatentSpace_v17	Dentate gyrus	6	3	3
LatentSpace_v17	Anterior cingulate area	34	39	-5
LatentSpace_v17	Infralimbic area	10	26	-16
LatentSpace_v17	Retrosplenial area	25	36	-11
LatentSpace_v17	Prelimbic area	29	35	-6
LatentSpace_v17	Primary auditory area	35	38	-3
LatentSpace_v17	Dorsal auditory area	35	38	-3
LatentSpace_v17	Ventral auditory area	36	38	-2
LatentSpace_v17	Agranular insular area	23	37	-14
LatentSpace_v17	Ectorhinal area	22	33	-11
LatentSpace_v17	Primary motor area	35	38	-3
LatentSpace_v17	Secondary motor area	35	38	-3
LatentSpace_v17	Frontal pole, cerebral cortex	31	40	-9
LatentSpace_v17	Orbital area	24	35	-11
LatentSpace_v17	Posterior parietal association areas	33	38	-5
LatentSpace_v17	Perirhinal area	16	32	-16
LatentSpace_v17	Primary somatosensory area	28	35	-7
LatentSpace_v17	Supplemental somatosensory area	36	38	-2
LatentSpace_v17	Temporal association areas	29	33	-4
LatentSpace_v17	Visual areas	31	38	-7
LatentSpace_v17	Pallidum	7	6	1
LatentSpace_v17	Striatum ventral region	8	3	5
LatentSpace_v17	Lateral septal complex	7	4	3
LatentSpace_v17	Caudoputamen	3	3	0
LatentSpace_v17	Medial amygdalar nucleus	11	7	4
LatentSpace_v17	Hypothalamus	5	9	-4
LatentSpace_v17	Thalamus	1	1	0
LatentSpace_v17	Inferior colliculus	7	9	-2
LatentSpace_v17	Superior colliculus, sensory related	4	10	-6
LatentSpace_v17	Midbrain raphe nuclei	11	12	-1
LatentSpace_v17	Midbrain-other	8	10	-2
LatentSpace_v17	Periaqueductal gray	8	11	-3
LatentSpace_v17	Pons	10	9	1
LatentSpace_v17	Medulla	11	9	2
LatentSpace_v17	Lingula (I)	17	34	-17
LatentSpace_v17	Central lobule	26	34	-8
LatentSpace_v17	Culmen	24	34	-10
LatentSpace_v17	Declive (VI)	23	28	-5
LatentSpace_v17	Folium-tuber vermis (VII)	23	31	-8
LatentSpace_v17	Pyramus (VIII)	23	32	-9
LatentSpace_v17	Uvula (IX)	28	34	-6
LatentSpace_v17	Nodulus (X)	21	35	-14
LatentSpace_v17	Simple lobule	23	29	-6
LatentSpace_v17	Crus 1	22	26	-4
LatentSpace_v17	Crus 2	22	27	-5
LatentSpace_v17	Paramedian lobule	23	33	-10
LatentSpace_v17	Copula pyramidis	26	34	-8
LatentSpace_v17	Flocculus	12	34	-22
LatentSpace_v17	Paraflocculus	8	36	-28
LatentSpace_v17	Cerebellar nuclei	14	11	3
LatentSpace_v18	Cortical subplate-other	8	15	-7
LatentSpace_v18	Claustrum	26	33	-7
LatentSpace_v18	Endopiriform nucleus	19	32	-13
LatentSpace_v18	Olfactory areas-other	13	33	-20
LatentSpace_v18	Postpiriform transition area	14	27	-13
LatentSpace_v18	Piriform area	22	34	-12
LatentSpace_v18	Taenia tecta	13	28	-15
LatentSpace_v18	Cortical amygdalar area	9	19	-10
LatentSpace_v18	Piriform-amygdalar area	15	28	-13
LatentSpace_v18	Main olfactory bulb	21	10	11
LatentSpace_v18	Accessory olfactory bulb	35	19	16
LatentSpace_v18	Anterior olfactory nucleus	13	32	-19
LatentSpace_v18	Subiculum	9	35	-26
LatentSpace_v18	Entorhinal area	17	22	-5
LatentSpace_v18	Field CA1	8	25	-17
LatentSpace_v18	Field CA2	10	14	-4
LatentSpace_v18	Field CA3	7	8	-1
LatentSpace_v18	Dentate gyrus	8	3	5
LatentSpace_v18	Anterior cingulate area	38	39	-1
LatentSpace_v18	Infralimbic area	12	26	-14
LatentSpace_v18	Retrosplenial area	28	36	-8
LatentSpace_v18	Prelimbic area	28	35	-7
LatentSpace_v18	Primary auditory area	37	38	-1
LatentSpace_v18	Dorsal auditory area	35	38	-3
LatentSpace_v18	Ventral auditory area	38	38	0
LatentSpace_v18	Agranular insular area	19	37	-18
LatentSpace_v18	Ectorhinal area	24	33	-9
LatentSpace_v18	Primary motor area	35	38	-3
LatentSpace_v18	Secondary motor area	37	38	-1
LatentSpace_v18	Frontal pole, cerebral cortex	32	40	-8
LatentSpace_v18	Orbital area	27	35	-8
LatentSpace_v18	Posterior parietal association areas	35	38	-3
LatentSpace_v18	Perirhinal area	18	32	-14
LatentSpace_v18	Primary somatosensory area	35	35	0
LatentSpace_v18	Supplemental somatosensory area	37	38	-1
LatentSpace_v18	Temporal association areas	34	33	1
LatentSpace_v18	Visual areas	35	38	-3
LatentSpace_v18	Pallidum	7	6	1
LatentSpace_v18	Striatum ventral region	6	3	3
LatentSpace_v18	Lateral septal complex	6	4	2
LatentSpace_v18	Caudoputamen	3	3	0
LatentSpace_v18	Medial amygdalar nucleus	9	7	2
LatentSpace_v18	Hypothalamus	8	9	-1
LatentSpace_v18	Thalamus	1	1	0
LatentSpace_v18	Inferior colliculus	5	9	-4
LatentSpace_v18	Superior colliculus, sensory related	4	10	-6
LatentSpace_v18	Midbrain raphe nuclei	13	12	1
LatentSpace_v18	Midbrain-other	11	10	1
LatentSpace_v18	Periaqueductal gray	10	11	-1
LatentSpace_v18	Pons	12	9	3
LatentSpace_v18	Medulla	10	9	1
LatentSpace_v18	Lingula (I)	25	34	-9
LatentSpace_v18	Central lobule	29	34	-5
LatentSpace_v18	Culmen	24	34	-10
LatentSpace_v18	Declive (VI)	23	28	-5
LatentSpace_v18	Folium-tuber vermis (VII)	23	31	-8
LatentSpace_v18	Pyramus (VIII)	25	32	-7
LatentSpace_v18	Uvula (IX)	34	34	0
LatentSpace_v18	Nodulus (X)	24	35	-11
LatentSpace_v18	Simple lobule	23	29	-6
LatentSpace_v18	Crus 1	23	26	-3
LatentSpace_v18	Crus 2	23	27	-4
LatentSpace_v18	Paramedian lobule	26	33	-7
LatentSpace_v18	Copula pyramidis	28	34	-6
LatentSpace_v18	Flocculus	32	34	-2
LatentSpace_v18	Paraflocculus	27	36	-9
LatentSpace_v18	Cerebellar nuclei	15	11	4
LatentSpace_v19	Cortical subplate-other	6	15	-9
LatentSpace_v19	Claustrum	15	33	-18
LatentSpace_v19	Endopiriform nucleus	9	32	-23
LatentSpace_v19	Olfactory areas-other	11	33	-22
LatentSpace_v19	Postpiriform transition area	8	27	-19
LatentSpace_v19	Piriform area	10	34	-24
LatentSpace_v19	Taenia tecta	8	28	-20
LatentSpace_v19	Cortical amygdalar area	3	19	-16
LatentSpace_v19	Piriform-amygdalar area	5	28	-23
LatentSpace_v19	Main olfactory bulb	33	10	23
LatentSpace_v19	Accessory olfactory bulb	21	19	2
LatentSpace_v19	Anterior olfactory nucleus	10	32	-22
LatentSpace_v19	Subiculum	3	35	-32
LatentSpace_v19	Entorhinal area	10	22	-12
LatentSpace_v19	Field CA1	6	25	-19
LatentSpace_v19	Field CA2	6	14	-8
LatentSpace_v19	Field CA3	5	8	-3
LatentSpace_v19	Dentate gyrus	6	3	3
LatentSpace_v19	Anterior cingulate area	37	39	-2
LatentSpace_v19	Infralimbic area	8	26	-18
LatentSpace_v19	Retrosplenial area	25	36	-11
LatentSpace_v19	Prelimbic area	26	35	-9
LatentSpace_v19	Primary auditory area	37	38	-1
LatentSpace_v19	Dorsal auditory area	35	38	-3
LatentSpace_v19	Ventral auditory area	36	38	-2
LatentSpace_v19	Agranular insular area	21	37	-16
LatentSpace_v19	Ectorhinal area	21	33	-12
LatentSpace_v19	Primary motor area	35	38	-3
LatentSpace_v19	Secondary motor area	35	38	-3
LatentSpace_v19	Frontal pole, cerebral cortex	29	40	-11
LatentSpace_v19	Orbital area	21	35	-14
LatentSpace_v19	Posterior parietal association areas	34	38	-4
LatentSpace_v19	Perirhinal area	16	32	-16
LatentSpace_v19	Primary somatosensory area	32	35	-3
LatentSpace_v19	Supplemental somatosensory area	36	38	-2
LatentSpace_v19	Temporal association areas	25	33	-8
LatentSpace_v19	Visual areas	35	38	-3
LatentSpace_v19	Pallidum	7	6	1
LatentSpace_v19	Striatum ventral region	6	3	3
LatentSpace_v19	Lateral septal complex	7	4	3
LatentSpace_v19	Caudoputamen	3	3	0
LatentSpace_v19	Medial amygdalar nucleus	9	7	2
LatentSpace_v19	Hypothalamus	5	9	-4
LatentSpace_v19	Thalamus	4	1	3
LatentSpace_v19	Inferior colliculus	4	9	-5
LatentSpace_v19	Superior colliculus, sensory related	6	10	-4
LatentSpace_v19	Midbrain raphe nuclei	14	12	2
LatentSpace_v19	Midbrain-other	10	10	0
LatentSpace_v19	Periaqueductal gray	11	11	0
LatentSpace_v19	Pons	9	9	0
LatentSpace_v19	Medulla	11	9	2
LatentSpace_v19	Lingula (I)	15	34	-19
LatentSpace_v19	Central lobule	21	34	-13
LatentSpace_v19	Culmen	26	34	-8
LatentSpace_v19	Declive (VI)	23	28	-5
LatentSpace_v19	Folium-tuber vermis (VII)	24	31	-7
LatentSpace_v19	Pyramus (VIII)	27	32	-5
LatentSpace_v19	Uvula (IX)	33	34	-1
LatentSpace_v19	Nodulus (X)	29	35	-6
LatentSpace_v19	Simple lobule	22	29	-7
LatentSpace_v19	Crus 1	22	26	-4
LatentSpace_v19	Crus 2	22	27	-5
LatentSpace_v19	Paramedian lobule	23	33	-10
LatentSpace_v19	Copula pyramidis	25	34	-9
LatentSpace_v19	Flocculus	31	34	-3
LatentSpace_v19	Paraflocculus	25	36	-11
LatentSpace_v19	Cerebellar nuclei	12	11	1
LatentSpace_v20	Cortical subplate-other	11	15	-4
LatentSpace_v20	Claustrum	25	33	-8
LatentSpace_v20	Endopiriform nucleus	12	32	-20
LatentSpace_v20	Olfactory areas-other	18	33	-15
LatentSpace_v20	Postpiriform transition area	11	27	-16
LatentSpace_v20	Piriform area	15	34	-19
LatentSpace_v20	Taenia tecta	13	28	-15
LatentSpace_v20	Cortical amygdalar area	7	19	-12
LatentSpace_v20	Piriform-amygdalar area	8	28	-20
LatentSpace_v20	Main olfactory bulb	15	10	5
LatentSpace_v20	Accessory olfactory bulb	7	19	-12
LatentSpace_v20	Anterior olfactory nucleus	13	32	-19
LatentSpace_v20	Subiculum	9	35	-26
LatentSpace_v20	Entorhinal area	11	22	-11
LatentSpace_v20	Field CA1	8	25	-17
LatentSpace_v20	Field CA2	7	14	-7
LatentSpace_v20	Field CA3	7	8	-1
LatentSpace_v20	Dentate gyrus	8	3	5
LatentSpace_v20	Anterior cingulate area	35	39	-4
LatentSpace_v20	Infralimbic area	12	26	-14
LatentSpace_v20	Retrosplenial area	25	36	-11
LatentSpace_v20	Prelimbic area	27	35	-8
LatentSpace_v20	Primary auditory area	35	38	-3
LatentSpace_v20	Dorsal auditory area	34	38	-4
LatentSpace_v20	Ventral auditory area	36	38	-2
LatentSpace_v20	Agranular insular area	23	37	-14
LatentSpace_v20	Ectorhinal area	23	33	-10
LatentSpace_v20	Primary motor area	35	38	-3
LatentSpace_v20	Secondary motor area	37	38	-1
LatentSpace_v20	Frontal pole, cerebral cortex	26	40	-14
LatentSpace_v20	Orbital area	20	35	-15
LatentSpace_v20	Posterior parietal association areas	35	38	-3
LatentSpace_v20	Perirhinal area	16	32	-16
LatentSpace_v20	Primary somatosensory area	28	35	-7
LatentSpace_v20	Supplemental somatosensory area	35	38	-3
LatentSpace_v20	Temporal association areas	29	33	-4
LatentSpace_v20	Visual areas	30	38	-8
LatentSpace_v20	Pallidum	7	6	1
LatentSpace_v20	Striatum ventral region	7	3	4
LatentSpace_v20	Lateral septal complex	11	4	7
LatentSpace_v20	Caudoputamen	3	3	0
LatentSpace_v20	Medial amygdalar nucleus	10	7	3
LatentSpace_v20	Hypothalamus	5	9	-4
LatentSpace_v20	Thalamus	8	1	7
LatentSpace_v20	Inferior colliculus	5	9	-4
LatentSpace_v20	Superior colliculus, sensory related	4	10	-6
LatentSpace_v20	Midbrain raphe nuclei	14	12	2
LatentSpace_v20	Midbrain-other	10	10	0
LatentSpace_v20	Periaqueductal gray	10	11	-1
LatentSpace_v20	Pons	9	9	0
LatentSpace_v20	Medulla	19	9	10
LatentSpace_v20	Lingula (I)	6	34	-28
LatentSpace_v20	Central lobule	4	34	-30
LatentSpace_v20	Culmen	9	34	-25
LatentSpace_v20	Declive (VI)	24	28	-4
LatentSpace_v20	Folium-tuber vermis (VII)	23	31	-8
LatentSpace_v20	Pyramus (VIII)	26	32	-6
LatentSpace_v20	Uvula (IX)	32	34	-2
LatentSpace_v20	Nodulus (X)	18	35	-17
LatentSpace_v20	Simple lobule	26	29	-3
LatentSpace_v20	Crus 1	22	26	-4
LatentSpace_v20	Crus 2	23	27	-4
LatentSpace_v20	Paramedian lobule	23	33	-10
LatentSpace_v20	Copula pyramidis	24	34	-10
LatentSpace_v20	Flocculus	32	34	-2
LatentSpace_v20	Paraflocculus	24	36	-12
LatentSpace_v20	Cerebellar nuclei	11	11	0
LatentSpace_v21	Cortical subplate-other	13	15	-2
LatentSpace_v21	Claustrum	23	33	-10
LatentSpace_v21	Endopiriform nucleus	17	32	-15
LatentSpace_v21	Olfactory areas-other	15	33	-18
LatentSpace_v21	Postpiriform transition area	13	27	-14
LatentSpace_v21	Piriform area	17	34	-17
LatentSpace_v21	Taenia tecta	11	28	-17
LatentSpace_v21	Cortical amygdalar area	12	19	-7
LatentSpace_v21	Piriform-amygdalar area	15	28	-13
LatentSpace_v21	Main olfactory bulb	4	10	-6
LatentSpace_v21	Accessory olfactory bulb	37	19	18
LatentSpace_v21	Anterior olfactory nucleus	9	32	-23
LatentSpace_v21	Subiculum	9	35	-26
LatentSpace_v21	Entorhinal area	18	22	-4
LatentSpace_v21	Field CA1	8	25	-17
LatentSpace_v21	Field CA2	8	14	-6
LatentSpace_v21	Field CA3	9	8	1
LatentSpace_v21	Dentate gyrus	9	3	6
LatentSpace_v21	Anterior cingulate area	33	39	-6
LatentSpace_v21	Infralimbic area	12	26	-14
LatentSpace_v21	Retrosplenial area	23	36	-13
LatentSpace_v21	Prelimbic area	28	35	-7
LatentSpace_v21	Primary auditory area	35	38	-3
LatentSpace_v21	Dorsal auditory area	35	38	-3
LatentSpace_v21	Ventral auditory area	37	38	-1
LatentSpace_v21	Agranular insular area	23	37	-14
LatentSpace_v21	Ectorhinal area	23	33	-10
LatentSpace_v21	Primary motor area	35	38	-3
LatentSpace_v21	Secondary motor area	35	38	-3
LatentSpace_v21	Frontal pole, cerebral cortex	29	40	-11
LatentSpace_v21	Orbital area	21	35	-14
LatentSpace_v21	Posterior parietal association areas	31	38	-7
LatentSpace_v21	Perirhinal area	18	32	-14
LatentSpace_v21	Primary somatosensory area	29	35	-6
LatentSpace_v21	Supplemental somatosensory area	35	38	-3
LatentSpace_v21	Temporal association areas	30	33	-3
LatentSpace_v21	Visual areas	30	38	-8
LatentSpace_v21	Pallidum	7	6	1
LatentSpace_v21	Striatum ventral region	5	3	2
LatentSpace_v21	Lateral septal complex	10	4	6
LatentSpace_v21	Caudoputamen	3	3	0
LatentSpace_v21	Medial amygdalar nucleus	14	7	7
LatentSpace_v21	Hypothalamus	13	9	4
LatentSpace_v21	Thalamus	8	1	7
LatentSpace_v21	Inferior colliculus	10	9	1
LatentSpace_v21	Superior colliculus, sensory related	8	10	-2
LatentSpace_v21	Midbrain raphe nuclei	15	12	3
LatentSpace_v21	Midbrain-other	12	10	2
LatentSpace_v21	Periaqueductal gray	14	11	3
LatentSpace_v21	Pons	11	9	2
LatentSpace_v21	Medulla	6	9	-3
LatentSpace_v21	Lingula (I)	17	34	-17
LatentSpace_v21	Central lobule	25	34	-9
LatentSpace_v21	Culmen	25	34	-9
LatentSpace_v21	Declive (VI)	22	28	-6
LatentSpace_v21	Folium-tuber vermis (VII)	23	31	-8
LatentSpace_v21	Pyramus (VIII)	24	32	-8
LatentSpace_v21	Uvula (IX)	26	34	-8
LatentSpace_v21	Nodulus (X)	17	35	-18
LatentSpace_v21	Simple lobule	23	29	-6
LatentSpace_v21	Crus 1	21	26	-5
LatentSpace_v21	Crus 2	21	27	-6
LatentSpace_v21	Paramedian lobule	21	33	-12
LatentSpace_v21	Copula pyramidis	23	34	-11
LatentSpace_v21	Flocculus	14	34	-20
LatentSpace_v21	Paraflocculus	33	36	-3
LatentSpace_v21	Cerebellar nuclei	22	11	11
LatentSpace_v22	Cortical subplate-other	9	15	-6
LatentSpace_v22	Claustrum	23	33	-10
LatentSpace_v22	Endopiriform nucleus	17	32	-15
LatentSpace_v22	Olfactory areas-other	12	33	-21
LatentSpace_v22	Postpiriform transition area	8	27	-19
LatentSpace_v22	Piriform area	17	34	-17
LatentSpace_v22	Taenia tecta	13	28	-15
LatentSpace_v22	Cortical amygdalar area	7	19	-12
LatentSpace_v22	Piriform-amygdalar area	6	28	-22
LatentSpace_v22	Main olfactory bulb	23	10	13
LatentSpace_v22	Accessory olfactory bulb	18	19	-1
LatentSpace_v22	Anterior olfactory nucleus	10	32	-22
LatentSpace_v22	Subiculum	3	35	-32
LatentSpace_v22	Entorhinal area	10	22	-12
LatentSpace_v22	Field CA1	6	25	-19
LatentSpace_v22	Field CA2	8	14	-6
LatentSpace_v22	Field CA3	6	8	-2
LatentSpace_v22	Dentate gyrus	8	3	5
LatentSpace_v22	Anterior cingulate area	36	39	-3
LatentSpace_v22	Infralimbic area	9	26	-17
LatentSpace_v22	Retrosplenial area	22	36	-14
LatentSpace_v22	Prelimbic area	27	35	-8
LatentSpace_v22	Primary auditory area	36	38	-2
LatentSpace_v22	Dorsal auditory area	35	38	-3
LatentSpace_v22	Ventral auditory area	36	38	-2
LatentSpace_v22	Agranular insular area	25	37	-12
LatentSpace_v22	Ectorhinal area	22	33	-11
LatentSpace_v22	Primary motor area	35	38	-3
LatentSpace_v22	Secondary motor area	36	38	-2
LatentSpace_v22	Frontal pole, cerebral cortex	32	40	-8
LatentSpace_v22	Orbital area	28	35	-7
LatentSpace_v22	Posterior parietal association areas	33	38	-5
LatentSpace_v22	Perirhinal area	16	32	-16
LatentSpace_v22	Primary somatosensory area	31	35	-4
LatentSpace_v22	Supplemental somatosensory area	36	38	-2
LatentSpace_v22	Temporal association areas	26	33	-7
LatentSpace_v22	Visual areas	31	38	-7
LatentSpace_v22	Pallidum	7	6	1
LatentSpace_v22	Striatum ventral region	6	3	3
LatentSpace_v22	Lateral septal complex	6	4	2
LatentSpace_v22	Caudoputamen	3	3	0
LatentSpace_v22	Medial amygdalar nucleus	12	7	5
LatentSpace_v22	Hypothalamus	5	9	-4
LatentSpace_v22	Thalamus	9	1	8
LatentSpace_v22	Inferior colliculus	10	9	1
LatentSpace_v22	Superior colliculus, sensory related	10	10	0
LatentSpace_v22	Midbrain raphe nuclei	14	12	2
LatentSpace_v22	Midbrain-other	12	10	2
LatentSpace_v22	Periaqueductal gray	13	11	2
LatentSpace_v22	Pons	8	9	-1
LatentSpace_v22	Medulla	11	9	2
LatentSpace_v22	Lingula (I)	13	34	-21
LatentSpace_v22	Central lobule	9	34	-25
LatentSpace_v22	Culmen	29	34	-5
LatentSpace_v22	Declive (VI)	22	28	-6
LatentSpace_v22	Folium-tuber vermis (VII)	23	31	-8
LatentSpace_v22	Pyramus (VIII)	23	32	-9
LatentSpace_v22	Uvula (IX)	29	34	-5
LatentSpace_v22	Nodulus (X)	19	35	-16
LatentSpace_v22	Simple lobule	21	29	-8
LatentSpace_v22	Crus 1	21	26	-5
LatentSpace_v22	Crus 2	21	27	-6
LatentSpace_v22	Paramedian lobule	23	33	-10
LatentSpace_v22	Copula pyramidis	23	34	-11
LatentSpace_v22	Flocculus	24	34	-10
LatentSpace_v22	Paraflocculus	23	36	-13
LatentSpace_v22	Cerebellar nuclei	13	11	2
LatentSpace_v23	Cortical subplate-other	10	15	-5
LatentSpace_v23	Claustrum	22	33	-11
LatentSpace_v23	Endopiriform nucleus	11	32	-21
LatentSpace_v23	Olfactory areas-other	22	33	-11
LatentSpace_v23	Postpiriform transition area	13	27	-14
LatentSpace_v23	Piriform area	15	34	-19
LatentSpace_v23	Taenia tecta	14	28	-14
LatentSpace_v23	Cortical amygdalar area	11	19	-8
LatentSpace_v23	Piriform-amygdalar area	13	28	-15
LatentSpace_v23	Main olfactory bulb	8	10	-2
LatentSpace_v23	Accessory olfactory bulb	21	19	2
LatentSpace_v23	Anterior olfactory nucleus	21	32	-11
LatentSpace_v23	Subiculum	4	35	-31
LatentSpace_v23	Entorhinal area	14	22	-8
LatentSpace_v23	Field CA1	7	25	-18
LatentSpace_v23	Field CA2	6	14	-8
LatentSpace_v23	Field CA3	8	8	0
LatentSpace_v23	Dentate gyrus	9	3	6
LatentSpace_v23	Anterior cingulate area	35	39	-4
LatentSpace_v23	Infralimbic area	11	26	-15
LatentSpace_v23	Retrosplenial area	24	36	-12
LatentSpace_v23	Prelimbic area	26	35	-9
LatentSpace_v23	Primary auditory area	35	38	-3
LatentSpace_v23	Dorsal auditory area	32	38	-6
LatentSpace_v23	Ventral auditory area	35	38	-3
LatentSpace_v23	Agranular insular area	23	37	-14
LatentSpace_v23	Ectorhinal area	24	33	-9
LatentSpace_v23	Primary motor area	34	38	-4
LatentSpace_v23	Secondary motor area	33	38	-5
LatentSpace_v23	Frontal pole, cerebral cortex	26	40	-14
LatentSpace_v23	Orbital area	24	35	-11
LatentSpace_v23	Posterior parietal association areas	33	38	-5
LatentSpace_v23	Perirhinal area	19	32	-13
LatentSpace_v23	Primary somatosensory area	26	35	-9
LatentSpace_v23	Supplemental somatosensory area	35	38	-3
LatentSpace_v23	Temporal association areas	31	33	-2
LatentSpace_v23	Visual areas	31	38	-7
LatentSpace_v23	Pallidum	5	6	-1
LatentSpace_v23	Striatum ventral region	5	3	2
LatentSpace_v23	Lateral septal complex	11	4	7
LatentSpace_v23	Caudoputamen	3	3	0
LatentSpace_v23	Medial amygdalar nucleus	11	7	4
LatentSpace_v23	Hypothalamus	9	9	0
LatentSpace_v23	Thalamus	11	1	10
LatentSpace_v23	Inferior colliculus	6	9	-3
LatentSpace_v23	Superior colliculus, sensory related	6	10	-4
LatentSpace_v23	Midbrain raphe nuclei	14	12	2
LatentSpace_v23	Midbrain-other	13	10	3
LatentSpace_v23	Periaqueductal gray	13	11	2
LatentSpace_v23	Pons	8	9	-1
LatentSpace_v23	Medulla	10	9	1
LatentSpace_v23	Lingula (I)	13	34	-21
LatentSpace_v23	Central lobule	9	34	-25
LatentSpace_v23	Culmen	28	34	-6
LatentSpace_v23	Declive (VI)	22	28	-6
LatentSpace_v23	Folium-tuber vermis (VII)	23	31	-8
LatentSpace_v23	Pyramus (VIII)	23	32	-9
LatentSpace_v23	Uvula (IX)	33	34	-1
LatentSpace_v23	Nodulus (X)	19	35	-16
LatentSpace_v23	Simple lobule	22	29	-7
LatentSpace_v23	Crus 1	21	26	-5
LatentSpace_v23	Crus 2	22	27	-5
LatentSpace_v23	Paramedian lobule	23	33	-10
LatentSpace_v23	Copula pyramidis	26	34	-8
LatentSpace_v23	Flocculus	31	34	-3
LatentSpace_v23	Paraflocculus	24	36	-12
LatentSpace_v23	Cerebellar nuclei	11	11	0
LatentSpace_v24	Cortical subplate-other	9	15	-6
LatentSpace_v24	Claustrum	23	33	-10
LatentSpace_v24	Endopiriform nucleus	9	32	-23
LatentSpace_v24	Olfactory areas-other	18	33	-15
LatentSpace_v24	Postpiriform transition area	12	27	-15
LatentSpace_v24	Piriform area	12	34	-22
LatentSpace_v24	Taenia tecta	11	28	-17
LatentSpace_v24	Cortical amygdalar area	9	19	-10
LatentSpace_v24	Piriform-amygdalar area	12	28	-16
LatentSpace_v24	Main olfactory bulb	7	10	-3
LatentSpace_v24	Accessory olfactory bulb	30	19	11
LatentSpace_v24	Anterior olfactory nucleus	15	32	-17
LatentSpace_v24	Subiculum	4	35	-31
LatentSpace_v24	Entorhinal area	16	22	-6
LatentSpace_v24	Field CA1	7	25	-18
LatentSpace_v24	Field CA2	6	14	-8
LatentSpace_v24	Field CA3	6	8	-2
LatentSpace_v24	Dentate gyrus	9	3	6
LatentSpace_v24	Anterior cingulate area	39	39	0
LatentSpace_v24	Infralimbic area	11	26	-15
LatentSpace_v24	Retrosplenial area	31	36	-5
LatentSpace_v24	Prelimbic area	27	35	-8
LatentSpace_v24	Primary auditory area	35	38	-3
LatentSpace_v24	Dorsal auditory area	35	38	-3
LatentSpace_v24	Ventral auditory area	38	38	0
LatentSpace_v24	Agranular insular area	23	37	-14
LatentSpace_v24	Ectorhinal area	24	33	-9
LatentSpace_v24	Primary motor area	35	38	-3
LatentSpace_v24	Secondary motor area	36	38	-2
LatentSpace_v24	Frontal pole, cerebral cortex	36	40	-4
LatentSpace_v24	Orbital area	23	35	-12
LatentSpace_v24	Posterior parietal association areas	35	38	-3
LatentSpace_v24	Perirhinal area	19	32	-13
LatentSpace_v24	Primary somatosensory area	28	35	-7
LatentSpace_v24	Supplemental somatosensory area	35	38	-3
LatentSpace_v24	Temporal association areas	31	33	-2
LatentSpace_v24	Visual areas	35	38	-3
LatentSpace_v24	Pallidum	8	6	2
LatentSpace_v24	Striatum ventral region	5	3	2
LatentSpace_v24	Lateral septal complex	8	4	4
LatentSpace_v24	Caudoputamen	3	3	0
LatentSpace_v24	Medial amygdalar nucleus	11	7	4
LatentSpace_v24	Hypothalamus	9	9	0
LatentSpace_v24	Thalamus	11	1	10
LatentSpace_v24	Inferior colliculus	6	9	-3
LatentSpace_v24	Superior colliculus, sensory related	4	10	-6
LatentSpace_v24	Midbrain raphe nuclei	14	12	2
LatentSpace_v24	Midbrain-other	12	10	2
LatentSpace_v24	Periaqueductal gray	14	11	3
LatentSpace_v24	Pons	10	9	1
LatentSpace_v24	Medulla	10	9	1
LatentSpace_v24	Lingula (I)	13	34	-21
LatentSpace_v24	Central lobule	20	34	-14
LatentSpace_v24	Culmen	28	34	-6
LatentSpace_v24	Declive (VI)	23	28	-5
LatentSpace_v24	Folium-tuber vermis (VII)	24	31	-7
LatentSpace_v24	Pyramus (VIII)	26	32	-6
LatentSpace_v24	Uvula (IX)	34	34	0
LatentSpace_v24	Nodulus (X)	34	35	-1
LatentSpace_v24	Simple lobule	23	29	-6
LatentSpace_v24	Crus 1	23	26	-3
LatentSpace_v24	Crus 2	23	27	-4
LatentSpace_v24	Paramedian lobule	23	33	-10
LatentSpace_v24	Copula pyramidis	23	34	-11
LatentSpace_v24	Flocculus	27	34	-7
LatentSpace_v24	Paraflocculus	28	36	-8
LatentSpace_v24	Cerebellar nuclei	14	11	3
LatentSpace_v25	Cortical subplate-other	5	15	-10
LatentSpace_v25	Claustrum	24	33	-9
LatentSpace_v25	Endopiriform nucleus	15	32	-17
LatentSpace_v25	Olfactory areas-other	17	33	-16
LatentSpace_v25	Postpiriform transition area	15	27	-12
LatentSpace_v25	Piriform area	20	34	-14
LatentSpace_v25	Taenia tecta	13	28	-15
LatentSpace_v25	Cortical amygdalar area	7	19	-12
LatentSpace_v25	Piriform-amygdalar area	16	28	-12
LatentSpace_v25	Main olfactory bulb	44	10	34
LatentSpace_v25	Accessory olfactory bulb	27	19	8
LatentSpace_v25	Anterior olfactory nucleus	13	32	-19
LatentSpace_v25	Subiculum	3	35	-32
LatentSpace_v25	Entorhinal area	17	22	-5
LatentSpace_v25	Field CA1	7	25	-18
LatentSpace_v25	Field CA2	19	14	5
LatentSpace_v25	Field CA3	6	8	-2
LatentSpace_v25	Dentate gyrus	7	3	4
LatentSpace_v25	Anterior cingulate area	39	39	0
LatentSpace_v25	Infralimbic area	12	26	-14
LatentSpace_v25	Retrosplenial area	25	36	-11
LatentSpace_v25	Prelimbic area	30	35	-5
LatentSpace_v25	Primary auditory area	36	38	-2
LatentSpace_v25	Dorsal auditory area	35	38	-3
LatentSpace_v25	Ventral auditory area	37	38	-1
LatentSpace_v25	Agranular insular area	29	37	-8
LatentSpace_v25	Ectorhinal area	24	33	-9
LatentSpace_v25	Primary motor area	35	38	-3
LatentSpace_v25	Secondary motor area	37	38	-1
LatentSpace_v25	Frontal pole, cerebral cortex	36	40	-4
LatentSpace_v25	Orbital area	28	35	-7
LatentSpace_v25	Posterior parietal association areas	35	38	-3
LatentSpace_v25	Perirhinal area	23	32	-9
LatentSpace_v25	Primary somatosensory area	24	35	-11
LatentSpace_v25	Supplemental somatosensory area	36	38	-2
LatentSpace_v25	Temporal association areas	33	33	0
LatentSpace_v25	Visual areas	33	38	-5
LatentSpace_v25	Pallidum	7	6	1
LatentSpace_v25	Striatum ventral region	7	3	4
LatentSpace_v25	Lateral septal complex	8	4	4
LatentSpace_v25	Caudoputamen	3	3	0
LatentSpace_v25	Medial amygdalar nucleus	5	7	-2
LatentSpace_v25	Hypothalamus	6	9	-3
LatentSpace_v25	Thalamus	7	1	6
LatentSpace_v25	Inferior colliculus	10	9	1
LatentSpace_v25	Superior colliculus, sensory related	13	10	3
LatentSpace_v25	Midbrain raphe nuclei	13	12	1
LatentSpace_v25	Midbrain-other	14	10	4
LatentSpace_v25	Periaqueductal gray	13	11	2
LatentSpace_v25	Pons	11	9	2
LatentSpace_v25	Medulla	9	9	0
LatentSpace_v25	Lingula (I)	22	34	-12
LatentSpace_v25	Central lobule	31	34	-3
LatentSpace_v25	Culmen	28	34	-6
LatentSpace_v25	Declive (VI)	23	28	-5
LatentSpace_v25	Folium-tuber vermis (VII)	25	31	-6
LatentSpace_v25	Pyramus (VIII)	28	32	-4
LatentSpace_v25	Uvula (IX)	34	34	0
LatentSpace_v25	Nodulus (X)	34	35	-1
LatentSpace_v25	Simple lobule	23	29	-6
LatentSpace_v25	Crus 1	21	26	-5
LatentSpace_v25	Crus 2	21	27	-6
LatentSpace_v25	Paramedian lobule	24	33	-9
LatentSpace_v25	Copula pyramidis	27	34	-7
LatentSpace_v25	Flocculus	32	34	-2
LatentSpace_v25	Paraflocculus	29	36	-7
LatentSpace_v25	Cerebellar nuclei	33	11	22
LatentSpace_v26	Cortical subplate-other	11	15	-4
LatentSpace_v26	Claustrum	22	33	-11
LatentSpace_v26	Endopiriform nucleus	11	32	-21
LatentSpace_v26	Olfactory areas-other	13	33	-20
LatentSpace_v26	Postpiriform transition area	11	27	-16
LatentSpace_v26	Piriform area	17	34	-17
LatentSpace_v26	Taenia tecta	12	28	-16
LatentSpace_v26	Cortical amygdalar area	10	19	-9
LatentSpace_v26	Piriform-amygdalar area	12	28	-16
LatentSpace_v26	Main olfactory bulb	32	10	22
LatentSpace_v26	Accessory olfactory bulb	27	19	8
LatentSpace_v26	Anterior olfactory nucleus	12	32	-20
LatentSpace_v26	Subiculum	4	35	-31
LatentSpace_v26	Entorhinal area	6	22	-16
LatentSpace_v26	Field CA1	8	25	-17
LatentSpace_v26	Field CA2	8	14	-6
LatentSpace_v26	Field CA3	8	8	0
LatentSpace_v26	Dentate gyrus	7	3	4
LatentSpace_v26	Anterior cingulate area	35	39	-4
LatentSpace_v26	Infralimbic area	12	26	-14
LatentSpace_v26	Retrosplenial area	23	36	-13
LatentSpace_v26	Prelimbic area	29	35	-6
LatentSpace_v26	Primary auditory area	35	38	-3
LatentSpace_v26	Dorsal auditory area	35	38	-3
LatentSpace_v26	Ventral auditory area	38	38	0
LatentSpace_v26	Agranular insular area	24	37	-13
LatentSpace_v26	Ectorhinal area	23	33	-10
LatentSpace_v26	Primary motor area	35	38	-3
LatentSpace_v26	Secondary motor area	37	38	-1
LatentSpace_v26	Frontal pole, cerebral cortex	32	40	-8
LatentSpace_v26	Orbital area	24	35	-11
LatentSpace_v26	Posterior parietal association areas	35	38	-3
LatentSpace_v26	Perirhinal area	17	32	-15
LatentSpace_v26	Primary somatosensory area	31	35	-4
LatentSpace_v26	Supplemental somatosensory area	37	38	-1
LatentSpace_v26	Temporal association areas	36	33	3
LatentSpace_v26	Visual areas	31	38	-7
LatentSpace_v26	Pallidum	7	6	1
LatentSpace_v26	Striatum ventral region	5	3	2
LatentSpace_v26	Lateral septal complex	10	4	6
LatentSpace_v26	Caudoputamen	3	3	0
LatentSpace_v26	Medial amygdalar nucleus	11	7	4
LatentSpace_v26	Hypothalamus	4	9	-5
LatentSpace_v26	Thalamus	3	1	2
LatentSpace_v26	Inferior colliculus	10	9	1
LatentSpace_v26	Superior colliculus, sensory related	5	10	-5
LatentSpace_v26	Midbrain raphe nuclei	15	12	3
LatentSpace_v26	Midbrain-other	11	10	1
LatentSpace_v26	Periaqueductal gray	12	11	1
LatentSpace_v26	Pons	10	9	1
LatentSpace_v26	Medulla	13	9	4
LatentSpace_v26	Lingula (I)	13	34	-21
LatentSpace_v26	Central lobule	8	34	-26
LatentSpace_v26	Culmen	30	34	-4
LatentSpace_v26	Declive (VI)	22	28	-6
LatentSpace_v26	Folium-tuber vermis (VII)	23	31	-8
LatentSpace_v26	Pyramus (VIII)	23	32	-9
LatentSpace_v26	Uvula (IX)	31	34	-3
LatentSpace_v26	Nodulus (X)	19	35	-16
LatentSpace_v26	Simple lobule	22	29	-7
LatentSpace_v26	Crus 1	22	26	-4
LatentSpace_v26	Crus 2	22	27	-5
LatentSpace_v26	Paramedian lobule	23	33	-10
LatentSpace_v26	Copula pyramidis	23	34	-11
LatentSpace_v26	Flocculus	32	34	-2
LatentSpace_v26	Paraflocculus	27	36	-9
LatentSpace_v26	Cerebellar nuclei	17	11	6
LatentSpace_v27	Cortical subplate-other	11	15	-4
LatentSpace_v27	Claustrum	26	33	-7
LatentSpace_v27	Endopiriform nucleus	16	32	-16
LatentSpace_v27	Olfactory areas-other	10	33	-23
LatentSpace_v27	Postpiriform transition area	10	27	-17
LatentSpace_v27	Piriform area	15	34	-19
LatentSpace_v27	Taenia tecta	12	28	-16
LatentSpace_v27	Cortical amygdalar area	7	19	-12
LatentSpace_v27	Piriform-amygdalar area	7	28	-21
LatentSpace_v27	Main olfactory bulb	14	10	4
LatentSpace_v27	Accessory olfactory bulb	40	19	21
LatentSpace_v27	Anterior olfactory nucleus	18	32	-14
LatentSpace_v27	Subiculum	6	35	-29
LatentSpace_v27	Entorhinal area	15	22	-7
LatentSpace_v27	Field CA1	17	25	-8
LatentSpace_v27	Field CA2	20	14	6
LatentSpace_v27	Field CA3	5	8	-3
LatentSpace_v27	Dentate gyrus	6	3	3
LatentSpace_v27	Anterior cingulate area	35	39	-4
LatentSpace_v27	Infralimbic area	11	26	-15
LatentSpace_v27	Retrosplenial area	22	36	-14
LatentSpace_v27	Prelimbic area	24	35	-11
LatentSpace_v27	Primary auditory area	35	38	-3
LatentSpace_v27	Dorsal auditory area	35	38	-3
LatentSpace_v27	Ventral auditory area	37	38	-1
LatentSpace_v27	Agranular insular area	15	37	-22
LatentSpace_v27	Ectorhinal area	23	33	-10
LatentSpace_v27	Primary motor area	35	38	-3
LatentSpace_v27	Secondary motor area	36	38	-2
LatentSpace_v27	Frontal pole, cerebral cortex	25	40	-15
LatentSpace_v27	Orbital area	23	35	-12
LatentSpace_v27	Posterior parietal association areas	30	38	-8
LatentSpace_v27	Perirhinal area	20	32	-12
LatentSpace_v27	Primary somatosensory area	31	35	-4
LatentSpace_v27	Supplemental somatosensory area	36	38	-2
LatentSpace_v27	Temporal association areas	29	33	-4
LatentSpace_v27	Visual areas	33	38	-5
LatentSpace_v27	Pallidum	5	6	-1
LatentSpace_v27	Striatum ventral region	4	3	1
LatentSpace_v27	Lateral septal complex	5	4	1
LatentSpace_v27	Caudoputamen	3	3	0
LatentSpace_v27	Medial amygdalar nucleus	10	7	3
LatentSpace_v27	Hypothalamus	7	9	-2
LatentSpace_v27	Thalamus	6	1	5
LatentSpace_v27	Inferior colliculus	10	9	1
LatentSpace_v27	Superior colliculus, sensory related	6	10	-4
LatentSpace_v27	Midbrain raphe nuclei	14	12	2
LatentSpace_v27	Midbrain-other	12	10	2
LatentSpace_v27	Periaqueductal gray	8	11	-3
LatentSpace_v27	Pons	11	9	2
LatentSpace_v27	Medulla	10	9	1
LatentSpace_v27	Lingula (I)	22	34	-12
LatentSpace_v27	Central lobule	26	34	-8
LatentSpace_v27	Culmen	23	34	-11
LatentSpace_v27	Declive (VI)	23	28	-5
LatentSpace_v27	Folium-tuber vermis (VII)	23	31	-8
LatentSpace_v27	Pyramus (VIII)	25	32	-7
LatentSpace_v27	Uvula (IX)	32	34	-2
LatentSpace_v27	Nodulus (X)	17	35	-18
LatentSpace_v27	Simple lobule	22	29	-7
LatentSpace_v27	Crus 1	22	26	-4
LatentSpace_v27	Crus 2	22	27	-5
LatentSpace_v27	Paramedian lobule	23	33	-10
LatentSpace_v27	Copula pyramidis	28	34	-6
LatentSpace_v27	Flocculus	16	34	-18
LatentSpace_v27	Paraflocculus	23	36	-13
LatentSpace_v27	Cerebellar nuclei	29	11	18
LatentSpace_v28	Cortical subplate-other	7	15	-8
LatentSpace_v28	Claustrum	26	33	-7
LatentSpace_v28	Endopiriform nucleus	15	32	-17
LatentSpace_v28	Olfactory areas-other	11	33	-22
LatentSpace_v28	Postpiriform transition area	5	27	-22
LatentSpace_v28	Piriform area	15	34	-19
LatentSpace_v28	Taenia tecta	12	28	-16
LatentSpace_v28	Cortical amygdalar area	2	19	-17
LatentSpace_v28	Piriform-amygdalar area	4	28	-24
LatentSpace_v28	Main olfactory bulb	25	10	15
LatentSpace_v28	Accessory olfactory bulb	55	19	36
LatentSpace_v28	Anterior olfactory nucleus	9	32	-23
LatentSpace_v28	Subiculum	6	35	-29
LatentSpace_v28	Entorhinal area	19	22	-3
LatentSpace_v28	Field CA1	8	25	-17
LatentSpace_v28	Field CA2	15	14	1
LatentSpace_v28	Field CA3	6	8	-2
LatentSpace_v28	Dentate gyrus	6	3	3
LatentSpace_v28	Anterior cingulate area	38	39	-1
LatentSpace_v28	Infralimbic area	9	26	-17
LatentSpace_v28	Retrosplenial area	27	36	-9
LatentSpace_v28	Prelimbic area	28	35	-7
LatentSpace_v28	Primary auditory area	35	38	-3
LatentSpace_v28	Dorsal auditory area	35	38	-3
LatentSpace_v28	Ventral auditory area	37	38	-1
LatentSpace_v28	Agranular insular area	22	37	-15
LatentSpace_v28	Ectorhinal area	24	33	-9
LatentSpace_v28	Primary motor area	35	38	-3
LatentSpace_v28	Secondary motor area	37	38	-1
LatentSpace_v28	Frontal pole, cerebral cortex	35	40	-5
LatentSpace_v28	Orbital area	24	35	-11
LatentSpace_v28	Posterior parietal association areas	35	38	-3
LatentSpace_v28	Perirhinal area	23	32	-9
LatentSpace_v28	Primary somatosensory area	31	35	-4
LatentSpace_v28	Supplemental somatosensory area	36	38	-2
LatentSpace_v28	Temporal association areas	36	33	3
LatentSpace_v28	Visual areas	35	38	-3
LatentSpace_v28	Pallidum	10	6	4
LatentSpace_v28	Striatum ventral region	6	3	3
LatentSpace_v28	Lateral septal complex	9	4	5
LatentSpace_v28	Caudoputamen	3	3	0
LatentSpace_v28	Medial amygdalar nucleus	9	7	2
LatentSpace_v28	Hypothalamus	7	9	-2
LatentSpace_v28	Thalamus	9	1	8
LatentSpace_v28	Inferior colliculus	9	9	0
LatentSpace_v28	Superior colliculus, sensory related	4	10	-6
LatentSpace_v28	Midbrain raphe nuclei	14	12	2
LatentSpace_v28	Midbrain-other	11	10	1
LatentSpace_v28	Periaqueductal gray	12	11	1
LatentSpace_v28	Pons	9	9	0
LatentSpace_v28	Medulla	10	9	1
LatentSpace_v28	Lingula (I)	9	34	-25
LatentSpace_v28	Central lobule	10	34	-24
LatentSpace_v28	Culmen	28	34	-6
LatentSpace_v28	Declive (VI)	23	28	-5
LatentSpace_v28	Folium-tuber vermis (VII)	23	31	-8
LatentSpace_v28	Pyramus (VIII)	27	32	-5
LatentSpace_v28	Uvula (IX)	23	34	-11
LatentSpace_v28	Nodulus (X)	13	35	-22
LatentSpace_v28	Simple lobule	22	29	-7
LatentSpace_v28	Crus 1	22	26	-4
LatentSpace_v28	Crus 2	23	27	-4
LatentSpace_v28	Paramedian lobule	23	33	-10
LatentSpace_v28	Copula pyramidis	25	34	-9
LatentSpace_v28	Flocculus	13	34	-21
LatentSpace_v28	Paraflocculus	23	36	-13
LatentSpace_v28	Cerebellar nuclei	10	11	-1
LatentSpace_v29	Cortical subplate-other	10	15	-5
LatentSpace_v29	Claustrum	16	33	-17
LatentSpace_v29	Endopiriform nucleus	8	32	-24
LatentSpace_v29	Olfactory areas-other	20	33	-13
LatentSpace_v29	Postpiriform transition area	9	27	-18
LatentSpace_v29	Piriform area	9	34	-25
LatentSpace_v29	Taenia tecta	14	28	-14
LatentSpace_v29	Cortical amygdalar area	7	19	-12
LatentSpace_v29	Piriform-amygdalar area	8	28	-20
LatentSpace_v29	Main olfactory bulb	24	10	14
LatentSpace_v29	Accessory olfactory bulb	4	19	-15
LatentSpace_v29	Anterior olfactory nucleus	14	32	-18
LatentSpace_v29	Subiculum	7	35	-28
LatentSpace_v29	Entorhinal area	10	22	-12
LatentSpace_v29	Field CA1	3	25	-22
LatentSpace_v29	Field CA2	5	14	-9
LatentSpace_v29	Field CA3	7	8	-1
LatentSpace_v29	Dentate gyrus	7	3	4
LatentSpace_v29	Anterior cingulate area	33	39	-6
LatentSpace_v29	Infralimbic area	11	26	-15
LatentSpace_v29	Retrosplenial area	26	36	-10
LatentSpace_v29	Prelimbic area	24	35	-11
LatentSpace_v29	Primary auditory area	35	38	-3
LatentSpace_v29	Dorsal auditory area	35	38	-3
LatentSpace_v29	Ventral auditory area	37	38	-1
LatentSpace_v29	Agranular insular area	23	37	-14
LatentSpace_v29	Ectorhinal area	23	33	-10
LatentSpace_v29	Primary motor area	35	38	-3
LatentSpace_v29	Secondary motor area	35	38	-3
LatentSpace_v29	Frontal pole, cerebral cortex	32	40	-8
LatentSpace_v29	Orbital area	22	35	-13
LatentSpace_v29	Posterior parietal association areas	35	38	-3
LatentSpace_v29	Perirhinal area	17	32	-15
LatentSpace_v29	Primary somatosensory area	31	35	-4
LatentSpace_v29	Supplemental somatosensory area	36	38	-2
LatentSpace_v29	Temporal association areas	29	33	-4
LatentSpace_v29	Visual areas	35	38	-3
LatentSpace_v29	Pallidum	7	6	1
LatentSpace_v29	Striatum ventral region	6	3	3
LatentSpace_v29	Lateral septal complex	13	4	9
LatentSpace_v29	Caudoputamen	3	3	0
LatentSpace_v29	Medial amygdalar nucleus	11	7	4
LatentSpace_v29	Hypothalamus	16	9	7
LatentSpace_v29	Thalamus	6	1	5
LatentSpace_v29	Inferior colliculus	10	9	1
LatentSpace_v29	Superior colliculus, sensory related	9	10	-1
LatentSpace_v29	Midbrain raphe nuclei	14	12	2
LatentSpace_v29	Midbrain-other	12	10	2
LatentSpace_v29	Periaqueductal gray	14	11	3
LatentSpace_v29	Pons	11	9	2
LatentSpace_v29	Medulla	13	9	4
LatentSpace_v29	Lingula (I)	16	34	-18
LatentSpace_v29	Central lobule	29	34	-5
LatentSpace_v29	Culmen	30	34	-4
LatentSpace_v29	Declive (VI)	23	28	-5
LatentSpace_v29	Folium-tuber vermis (VII)	23	31	-8
LatentSpace_v29	Pyramus (VIII)	24	32	-8
LatentSpace_v29	Uvula (IX)	31	34	-3
LatentSpace_v29	Nodulus (X)	23	35	-12
LatentSpace_v29	Simple lobule	22	29	-7
LatentSpace_v29	Crus 1	22	26	-4
LatentSpace_v29	Crus 2	22	27	-5
LatentSpace_v29	Paramedian lobule	23	33	-10
LatentSpace_v29	Copula pyramidis	24	34	-10
LatentSpace_v29	Flocculus	20	34	-14
LatentSpace_v29	Paraflocculus	26	36	-10
LatentSpace_v29	Cerebellar nuclei	19	11	8
LatentSpace_v30	Cortical subplate-other	11	15	-4
LatentSpace_v30	Claustrum	21	33	-12
LatentSpace_v30	Endopiriform nucleus	10	32	-22
LatentSpace_v30	Olfactory areas-other	17	33	-16
LatentSpace_v30	Postpiriform transition area	12	27	-15
LatentSpace_v30	Piriform area	13	34	-21
LatentSpace_v30	Taenia tecta	11	28	-17
LatentSpace_v30	Cortical amygdalar area	6	19	-13
LatentSpace_v30	Piriform-amygdalar area	9	28	-19
LatentSpace_v30	Main olfactory bulb	20	10	10
LatentSpace_v30	Accessory olfactory bulb	37	19	18
LatentSpace_v30	Anterior olfactory nucleus	21	32	-11
LatentSpace_v30	Subiculum	5	35	-30
LatentSpace_v30	Entorhinal area	16	22	-6
LatentSpace_v30	Field CA1	8	25	-17
LatentSpace_v30	Field CA2	16	14	2
LatentSpace_v30	Field CA3	8	8	0
LatentSpace_v30	Dentate gyrus	10	3	7
LatentSpace_v30	Anterior cingulate area	35	39	-4
LatentSpace_v30	Infralimbic area	12	26	-14
LatentSpace_v30	Retrosplenial area	23	36	-13
LatentSpace_v30	Prelimbic area	28	35	-7
LatentSpace_v30	Primary auditory area	35	38	-3
LatentSpace_v30	Dorsal auditory area	35	38	-3
LatentSpace_v30	Ventral auditory area	37	38	-1
LatentSpace_v30	Agranular insular area	23	37	-14
LatentSpace_v30	Ectorhinal area	22	33	-11
LatentSpace_v30	Primary motor area	35	38	-3
LatentSpace_v30	Secondary motor area	35	38	-3
LatentSpace_v30	Frontal pole, cerebral cortex	33	40	-7
LatentSpace_v30	Orbital area	23	35	-12
LatentSpace_v30	Posterior parietal association areas	33	38	-5
LatentSpace_v30	Perirhinal area	16	32	-16
LatentSpace_v30	Primary somatosensory area	32	35	-3
LatentSpace_v30	Supplemental somatosensory area	36	38	-2
LatentSpace_v30	Temporal association areas	30	33	-3
LatentSpace_v30	Visual areas	34	38	-4
LatentSpace_v30	Pallidum	10	6	4
LatentSpace_v30	Striatum ventral region	8	3	5
LatentSpace_v30	Lateral septal complex	11	4	7
LatentSpace_v30	Caudoputamen	3	3	0
LatentSpace_v30	Medial amygdalar nucleus	12	7	5
LatentSpace_v30	Hypothalamus	8	9	-1
LatentSpace_v30	Thalamus	10	1	9
LatentSpace_v30	Inferior colliculus	8	9	-1
LatentSpace_v30	Superior colliculus, sensory related	8	10	-2
LatentSpace_v30	Midbrain raphe nuclei	18	12	6
LatentSpace_v30	Midbrain-other	12	10	2
LatentSpace_v30	Periaqueductal gray	12	11	1
LatentSpace_v30	Pons	6	9	-3
LatentSpace_v30	Medulla	9	9	0
LatentSpace_v30	Lingula (I)	14	34	-20
LatentSpace_v30	Central lobule	25	34	-9
LatentSpace_v30	Culmen	23	34	-11
LatentSpace_v30	Declive (VI)	22	28	-6
LatentSpace_v30	Folium-tuber vermis (VII)	22	31	-9
[truncated: 31,501 more rows]
