# Supplementary material for: Whole-brain comparison of rodent and human brains using spatial transcriptomics
Source: eLife. 2022 Nov 7;11:e79418. doi: 10.7554/eLife.79418 (PMC9708081; doi:10.7554/eLife.79418)
Supplement: Figure 3—source data 3. [file elife-79418-fig3-data3.csv]

MouseRegion	theta	theta_error	theta_lower	theta_upper	p	p_lower	p_upper
Cortical subplate-other	5.517452896418568	0.7085218632030741	4.10040917001242	6.9344966228247165	0.9959999999998161	0.9837040610782075	0.9990273339603737
Claustrum	5.517452896418638	0.7085218632030506	4.1004091700125365	6.934496622824739	0.9959999999998165	0.9837040610782094	0.9990273339603737
Endopiriform nucleus	0	0	0	0	1	1	1
Olfactory areas-other	0	0	0	0	1	1	1
Postpiriform transition area	0	0	0	0	1	1	1
Piriform area	0	0	0	0	1	1	1
Taenia tecta	0	0	0	0	1	1	1
Cortical amygdalar area	0	0	0	0	1	1	1
Piriform-amygdalar area	0	0	0	0	1	1	1
Main olfactory bulb	-1.2310368743157538	0.10692764528145253	-1.4448921648786588	-1.0171815837528488	0.2260000000002952	0.19078891178774643	0.26557675730036934
Accessory olfactory bulb	-1.5856272584884004	0.11905109948493829	-1.823729457458277	-1.3475250595185237	0.1700000007410546	0.13898696912533845	0.20627528883490354
Anterior olfactory nucleus	0	0	0	0	1	1	1
Subiculum	6.212606095751372	1.001001220173299	4.210603655404775	8.21460853609797	0.9979999999999997	0.9853795210728558	0.9997294027946595
Entorhinal area	5.109977737428445	0.5790901052797126	3.95179752686902	6.26815794798787	0.9939999999999996	0.9811423247984642	0.9981078695655836
Field CA1	6.212606095751254	1.0010012201732472	4.21060365540476	8.21460853609775	0.9979999999999994	0.9853795210728555	0.9997294027946595
Field CA2	1.5715186659001465	0.11849737630587927	1.334523913288388	1.8085134185119052	0.8279999983377688	0.791587958531772	0.8591821114494771
Field CA3	2.3891995658307743	0.16122320527798142	2.0667531552748115	2.711645976386737	0.9159999999999967	0.8876295176119863	0.9377103588051141
Dentate gyrus	0	0	0	0	0	0	0
Anterior cingulate area	3.7944672147997323	0.3048745848920189	3.1847180450156944	4.40421638458377	0.9779999999596194	0.960255122810178	0.9879219791570297
Infralimbic area	0	0	0	0	1	1	1
Retrosplenial area	0	0	0	0	1	1	1
Prelimbic area	5.5174528964185665	0.7085218632030406	4.100409170012485	6.934496622824648	0.9959999999998161	0.9837040610782085	0.9990273339603736
Primary auditory area	4.119037174812447	0.35641619275029623	3.4062047893118543	4.83186956031304	0.9839999999999997	0.967897888545832	0.9920914399766443
Dorsal auditory area	0	0	0	0	1	1	1
Ventral auditory area	1.9187591599728122	0.1338599607505189	1.6510392384717745	2.18647908147385	0.8719999999981527	0.8390314570086429	0.8990287400500587
Agranular insular area	0	0	0	0	1	1	1
Ectorhinal area	0	0	0	0	1	1	1
Primary motor area	0	0	0	0	1	1	1
Secondary motor area	3.409496184474748	0.25409838498533965	2.9012994145040683	3.9176929544454273	0.9679999999999349	0.9479106342501384	0.9805008560565103
Frontal pole, cerebral cortex	6.212606095751365	1.0010012201732834	4.210603655404798	8.214608536097932	0.9979999999999997	0.9853795210728561	0.9997294027946595
Orbital area	6.212606095751362	1.0010012201732825	4.210603655404796	8.214608536097927	0.9979999999999997	0.9853795210728561	0.9997294027946595
Posterior parietal association areas	6.212606095751419	1.001001220173315	4.210603655404789	8.21460853609805	0.9979999999999998	0.985379521072856	0.9997294027946595
Perirhinal area	0	0	0	0	1	1	1
Primary somatosensory area	0	0	0	0	1	1	1
Supplemental somatosensory area	3.178053830347894	0.22821771638697025	2.721618397573953	3.6344892631218344	0.959999999999998	0.9382903080511534	0.9742814890790706
Temporal association areas	1.8660451086093182	0.13128141877633187	1.6034822710566545	2.128607946161982	0.8659999999997441	0.8325045179939714	0.8936527835063143
Visual areas	0	0	0	0	1	1	1
Pallidum	-2.2196470158640507	0.15040237522430627	-2.520451766312663	-1.9188422654154382	0.09800000225657321	0.07443681430091663	0.12799072439152592
Striatum ventral region	-4.119037174812444	0.35641619275028685	-4.8318695603130175	-3.4062047893118703	0.01600000000000044	0.007908560023355871	0.032102111454167505
Lateral septal complex	-4.119037174812426	0.3564161927502855	-4.831869560312997	-3.406204789311855	0.016000000000000722	0.007908560023356031	0.03210211145416798
Caudoputamen	4.410776047954843	0.4107194048384623	3.5893372382779183	5.232214857631767	0.9879999999999405	0.9731255539652633	0.9946867008222348
Medial amygdalar nucleus	-1.7035667497949407	0.12389320381147366	-1.951353157417888	-1.4557803421719935	0.15400000096379587	0.12440588509178535	0.18911355943163605
Hypothalamus	0.7629782750627748	0.09603048427118241	0.5709173065204101	0.9550392436051396	0.6819999999998893	0.6389748118874734	0.7221274805155707
Thalamus	-2.9873640125980843	0.20919191057568973	-3.4057478337494635	-2.568980191446705	0.04800000051569719	0.0321163128151608	0.07116168160846041
Inferior colliculus	1.0879738904600655	0.10300624461742923	0.881961401225207	1.293986379694924	0.7479999999994367	0.7072285066722153	0.7848211609861593
Superior colliculus, sensory related	2.1751972438143765	0.1477568904527258	1.879683462908925	2.470711024719828	0.8979999989737995	0.8675747641247705	0.9220628765253731
Midbrain raphe nuclei	-2.313634929180604	0.15626906917770184	-2.6261730675360075	-2.0010967908252004	0.09000000000000219	0.06747284396572141	0.11908781410784736
Midbrain-other	-1.1200608320727292	0.10383921609673674	-1.3277392642662027	-0.9123823998792557	0.24600000000053127	0.20953356329194606	0.28651257203716585
Periaqueductal gray	-0.04800921918633455	0.0894684881556288	-0.22694619549759215	0.13092775712492305	0.48800000000000654	0.443505719399077	0.532685261508108
Pons	-0.6015025906487865	0.09351840112418158	-0.7885393928971497	-0.41446578840042336	0.35400000000000936	0.3124823760940991	0.39784179383230417
Medulla	-0.9643905266661369	0.10004395532617953	-1.164478437318496	-0.7643026160137778	0.27600000000048547	0.23785448238613527	0.31771285148541134
Lingula (I)	5.5174528964185665	0.7085218632030741	4.100409170012418	6.934496622824715	0.9959999999998161	0.9837040610782075	0.9990273339603737
Central lobule	6.212606095751394	1.0010012201733032	4.210603655404788	8.214608536098002	0.9979999999999998	0.985379521072856	0.9997294027946595
Culmen	0	0	0	0	1	1	1
Declive (VI)	0	0	0	0	1	1	1
Folium-tuber vermis (VII)	6.2126060957513145	1.0010012201733327	4.210603655404649	8.21460853609798	0.9979999999999996	0.985379521072854	0.9997294027946595
Pyramus (VIII)	3.5471512942552685	0.2710823334550337	3.0049866273452013	4.089315961165336	0.9719999999991844	0.9527988982551089	0.9835252752094136
Uvula (IX)	3.8918202903447483	0.31941877965769033	3.2529827310293675	4.530657849660129	0.9799999998477887	0.9627801451049373	0.9893412466585136
Nodulus (X)	6.212606095751311	1.0010012201732712	4.2106036554047686	8.214608536097852	0.9979999999999996	0.9853795210728558	0.9997294027946595
Simple lobule	5.517452896418582	0.7085218632030327	4.100409170012516	6.934496622824647	0.9959999999998163	0.9837040610782091	0.9990273339603736
Crus 1	0	0	0	0	1	1	1
Crus 2	0	0	0	0	1	1	1
Paramedian lobule	0	0	0	0	1	1	1
Copula pyramidis	0	0	0	0	1	1	1
Flocculus	3.8918202903447576	0.3194187796576911	3.2529827310293755	4.53065784966014	0.979999999847789	0.9627801451049376	0.9893412466585138
Paraflocculus	4.820281561393895	0.5019892300898711	3.816303101214153	5.824260021573638	0.9919999999665804	0.9784649494828584	0.9970537162665146
Cerebellar nuclei	-1.8833897920694898	0.13211971002872253	-2.147629212126935	-1.6191503720120446	0.1320000000005144	0.1045529721889213	0.16532207760625736
