# Supplementary material for: Whole-brain comparison of rodent and human brains using spatial transcriptomics
Source: eLife. 2022 Nov 7;11:e79418. doi: 10.7554/eLife.79418 (PMC9708081; doi:10.7554/eLife.79418)
Supplement: Figure 4—source data 1. [file elife-79418-fig4-data1.csv]

Data	MouseRegion	Target	TargetRank	Similarity
HomologousGenes	Cortical subplate-other	amygdala	2	0.958717715552911
HomologousGenes	Claustrum	claustrum	27	0.8135363756752898
HomologousGenes	Piriform area	piriform cortex	30	0.7827492249885531
HomologousGenes	Subiculum	subiculum	12	0.8986511756721928
HomologousGenes	Field CA1	CA1 field	1	1
HomologousGenes	Field CA2	CA2 field	2	0.9438362502992209
HomologousGenes	Field CA3	CA3 field	2	0.9640256995223712
HomologousGenes	Dentate gyrus	dentate gyrus	1	1
HomologousGenes	Anterior cingulate area	cingulate gyrus	5	0.9915581689450241
HomologousGenes	Primary auditory area	Heschl's gyrus	13	0.9601103819333847
HomologousGenes	Primary motor area	precentral gyrus	21	0.9366276731337154
HomologousGenes	Primary somatosensory area	postcentral gyrus	14	0.9498876562195252
HomologousGenes	Visual areas	cuneus	34	0.8569400383999393
HomologousGenes	Pallidum	globus pallidus	16	0.5864174316098497
HomologousGenes	Striatum ventral region	nucleus accumbens	1	1
HomologousGenes	Caudoputamen	caudate nucleus	1	1
HomologousGenes	Hypothalamus	hypothalamus	1	1
HomologousGenes	Thalamus	thalamus	1	1
HomologousGenes	Inferior colliculus	inferior colliculus	1	1
HomologousGenes	Superior colliculus	superior colliculus	1	1
HomologousGenes	Pons	pons	1	1
HomologousGenes	Medulla	myelencephalon	2	0.9394712475690139
HomologousGenes	Lingula (I)	vermal I-II	1	1
HomologousGenes	Declive (VI)	vermal VI	7	0.9439343923325771
HomologousGenes	Folium-tuber vermis (VII)	vermal VIIAf	20	0.9133223414173485
HomologousGenes	Pyramus (VIII)	vermal VIIIA	10	0.9191844105549145
HomologousGenes	Uvula (IX)	vermal IX	19	0.9034330443485056
HomologousGenes	Nodulus (X)	vermal X	7	0.9347297302792514
HomologousGenes	Simple lobule	VI	15	0.905028926274595
HomologousGenes	Crus 1	crus I	15	0.9117939308746895
HomologousGenes	Crus 2	crus II	22	0.8969088404024382
HomologousGenes	Paramedian lobule	VIIB	13	0.9004665525913839
HomologousGenes	Copula pyramidis	VIIIA	26	0.8824696971878069
HomologousGenes	Flocculus	X	9	0.9159570769039573
HomologousGenes	Paraflocculus	IX	25	0.7877758378027088
HomologousGenes	Cerebellar nuclei	cerebellar nuclei	1	1
LatentSpace_v1	Cortical subplate-other	amygdala	1	1
LatentSpace_v1	Claustrum	claustrum	1	1
LatentSpace_v1	Piriform area	piriform cortex	3	0.9863742258375616
LatentSpace_v1	Subiculum	subiculum	1	1
LatentSpace_v1	Field CA1	CA1 field	1	1
LatentSpace_v1	Field CA2	CA2 field	3	0.9027058712588462
LatentSpace_v1	Field CA3	CA3 field	2	0.9775789363276721
LatentSpace_v1	Dentate gyrus	dentate gyrus	6	0.8605261724084923
LatentSpace_v1	Anterior cingulate area	cingulate gyrus	5	0.979908874665428
LatentSpace_v1	Primary auditory area	Heschl's gyrus	2	0.9912126632586739
LatentSpace_v1	Primary motor area	precentral gyrus	2	0.9854935859152691
LatentSpace_v1	Primary somatosensory area	postcentral gyrus	5	0.9853321259473928
LatentSpace_v1	Visual areas	cuneus	12	0.9590939652563858
LatentSpace_v1	Pallidum	globus pallidus	18	0.5491439367351856
LatentSpace_v1	Striatum ventral region	nucleus accumbens	1	1
LatentSpace_v1	Caudoputamen	caudate nucleus	1	1
LatentSpace_v1	Hypothalamus	hypothalamus	1	1
LatentSpace_v1	Thalamus	thalamus	1	1
LatentSpace_v1	Inferior colliculus	inferior colliculus	1	1
LatentSpace_v1	Superior colliculus	superior colliculus	1	1
LatentSpace_v1	Pons	pons	1	1
LatentSpace_v1	Medulla	myelencephalon	2	0.9693937232694353
LatentSpace_v1	Lingula (I)	vermal I-II	8	0.8530240699096511
LatentSpace_v1	Declive (VI)	vermal VI	11	0.983989024867484
LatentSpace_v1	Folium-tuber vermis (VII)	vermal VIIAf	17	0.9706453931732043
LatentSpace_v1	Pyramus (VIII)	vermal VIIIA	14	0.9391980673803494
LatentSpace_v1	Uvula (IX)	vermal IX	10	0.8461988258922001
LatentSpace_v1	Nodulus (X)	vermal X	1	1
LatentSpace_v1	Simple lobule	VI	6	0.9698652302103496
LatentSpace_v1	Crus 1	crus I	7	0.9866586611099649
LatentSpace_v1	Crus 2	crus II	2	0.9784212361205457
LatentSpace_v1	Paramedian lobule	VIIB	3	0.9674150490604123
LatentSpace_v1	Copula pyramidis	VIIIA	19	0.9274883244152037
LatentSpace_v1	Flocculus	X	4	0.9771253053773342
LatentSpace_v1	Paraflocculus	IX	2	0.992205550141525
LatentSpace_v1	Cerebellar nuclei	cerebellar nuclei	1	1
LatentSpace_v2	Cortical subplate-other	amygdala	1	1
LatentSpace_v2	Claustrum	claustrum	1	1
LatentSpace_v2	Piriform area	piriform cortex	3	0.9748348387378255
LatentSpace_v2	Subiculum	subiculum	1	1
LatentSpace_v2	Field CA1	CA1 field	1	1
LatentSpace_v2	Field CA2	CA2 field	2	0.9536192642997581
LatentSpace_v2	Field CA3	CA3 field	3	0.9833896390214094
LatentSpace_v2	Dentate gyrus	dentate gyrus	6	0.8793023149823157
LatentSpace_v2	Anterior cingulate area	cingulate gyrus	4	0.9801828845830153
LatentSpace_v2	Primary auditory area	Heschl's gyrus	9	0.9719859822620704
LatentSpace_v2	Primary motor area	precentral gyrus	8	0.9825254483166385
LatentSpace_v2	Primary somatosensory area	postcentral gyrus	5	0.9892536811793354
LatentSpace_v2	Visual areas	cuneus	25	0.9077112112446999
LatentSpace_v2	Pallidum	globus pallidus	18	0.6703772442157371
LatentSpace_v2	Striatum ventral region	nucleus accumbens	1	1
LatentSpace_v2	Caudoputamen	caudate nucleus	1	1
LatentSpace_v2	Hypothalamus	hypothalamus	1	1
LatentSpace_v2	Thalamus	thalamus	1	1
LatentSpace_v2	Inferior colliculus	inferior colliculus	1	1
LatentSpace_v2	Superior colliculus	superior colliculus	1	1
LatentSpace_v2	Pons	pons	1	1
LatentSpace_v2	Medulla	myelencephalon	1	1
LatentSpace_v2	Lingula (I)	vermal I-II	12	0.7803918856491162
LatentSpace_v2	Declive (VI)	vermal VI	10	0.9595633423560248
LatentSpace_v2	Folium-tuber vermis (VII)	vermal VIIAf	22	0.9560033927774928
LatentSpace_v2	Pyramus (VIII)	vermal VIIIA	19	0.9134538203762169
LatentSpace_v2	Uvula (IX)	vermal IX	20	0.6917958985767223
LatentSpace_v2	Nodulus (X)	vermal X	2	0.9782047108129692
LatentSpace_v2	Simple lobule	VI	7	0.9299688075961596
LatentSpace_v2	Crus 1	crus I	11	0.9806624911298489
LatentSpace_v2	Crus 2	crus II	3	0.9832523929048569
LatentSpace_v2	Paramedian lobule	VIIB	4	0.9680941458569943
LatentSpace_v2	Copula pyramidis	VIIIA	19	0.9230986486329532
LatentSpace_v2	Flocculus	X	4	0.9084402076812947
LatentSpace_v2	Paraflocculus	IX	14	0.9035421327139205
LatentSpace_v2	Cerebellar nuclei	cerebellar nuclei	1	1
LatentSpace_v3	Cortical subplate-other	amygdala	1	1
LatentSpace_v3	Claustrum	claustrum	1	1
LatentSpace_v3	Piriform area	piriform cortex	1	1
LatentSpace_v3	Subiculum	subiculum	1	1
LatentSpace_v3	Field CA1	CA1 field	1	1
LatentSpace_v3	Field CA2	CA2 field	2	0.9341554884591641
LatentSpace_v3	Field CA3	CA3 field	1	1
LatentSpace_v3	Dentate gyrus	dentate gyrus	1	1
LatentSpace_v3	Anterior cingulate area	cingulate gyrus	10	0.9407258882581762
LatentSpace_v3	Primary auditory area	Heschl's gyrus	5	0.9593627338327252
LatentSpace_v3	Primary motor area	precentral gyrus	2	0.9873640736102578
LatentSpace_v3	Primary somatosensory area	postcentral gyrus	5	0.9713477108484243
LatentSpace_v3	Visual areas	cuneus	22	0.8911018608627163
LatentSpace_v3	Pallidum	globus pallidus	12	0.6864023464042817
LatentSpace_v3	Striatum ventral region	nucleus accumbens	1	1
LatentSpace_v3	Caudoputamen	caudate nucleus	1	1
LatentSpace_v3	Hypothalamus	hypothalamus	1	1
LatentSpace_v3	Thalamus	thalamus	1	1
LatentSpace_v3	Inferior colliculus	inferior colliculus	3	0.9822731699105569
LatentSpace_v3	Superior colliculus	superior colliculus	1	1
LatentSpace_v3	Pons	pons	1	1
LatentSpace_v3	Medulla	myelencephalon	1	1
LatentSpace_v3	Lingula (I)	vermal I-II	6	0.8662874024172673
LatentSpace_v3	Declive (VI)	vermal VI	18	0.983437898209804
LatentSpace_v3	Folium-tuber vermis (VII)	vermal VIIAf	14	0.9876067429168066
LatentSpace_v3	Pyramus (VIII)	vermal VIIIA	8	0.9650081400224426
LatentSpace_v3	Uvula (IX)	vermal IX	10	0.8682547731234338
LatentSpace_v3	Nodulus (X)	vermal X	2	0.9534651582829686
LatentSpace_v3	Simple lobule	VI	5	0.9647455771028945
LatentSpace_v3	Crus 1	crus I	10	0.9792711844688183
LatentSpace_v3	Crus 2	crus II	3	0.970749478557496
LatentSpace_v3	Paramedian lobule	VIIB	5	0.962796155630863
LatentSpace_v3	Copula pyramidis	VIIIA	17	0.9311707697734363
LatentSpace_v3	Flocculus	X	4	0.9608844205306895
LatentSpace_v3	Paraflocculus	IX	17	0.8966416137846317
LatentSpace_v3	Cerebellar nuclei	cerebellar nuclei	1	1
LatentSpace_v4	Cortical subplate-other	amygdala	1	1
LatentSpace_v4	Claustrum	claustrum	1	1
LatentSpace_v4	Piriform area	piriform cortex	1	1
LatentSpace_v4	Subiculum	subiculum	1	1
LatentSpace_v4	Field CA1	CA1 field	1	1
LatentSpace_v4	Field CA2	CA2 field	2	0.9518747315914147
LatentSpace_v4	Field CA3	CA3 field	2	0.9535680706652183
LatentSpace_v4	Dentate gyrus	dentate gyrus	7	0.9191568402368611
LatentSpace_v4	Anterior cingulate area	cingulate gyrus	1	1
LatentSpace_v4	Primary auditory area	Heschl's gyrus	12	0.9817876727744388
LatentSpace_v4	Primary motor area	precentral gyrus	9	0.9836969039260477
LatentSpace_v4	Primary somatosensory area	postcentral gyrus	3	0.9983506076130776
LatentSpace_v4	Visual areas	cuneus	13	0.957542628052474
LatentSpace_v4	Pallidum	globus pallidus	10	0.6720865966175559
LatentSpace_v4	Striatum ventral region	nucleus accumbens	1	1
LatentSpace_v4	Caudoputamen	caudate nucleus	1	1
LatentSpace_v4	Hypothalamus	hypothalamus	1	1
LatentSpace_v4	Thalamus	thalamus	1	1
LatentSpace_v4	Inferior colliculus	inferior colliculus	1	1
LatentSpace_v4	Superior colliculus	superior colliculus	1	1
LatentSpace_v4	Pons	pons	1	1
LatentSpace_v4	Medulla	myelencephalon	1	1
LatentSpace_v4	Lingula (I)	vermal I-II	9	0.8406022550913249
LatentSpace_v4	Declive (VI)	vermal VI	13	0.9602249387611371
LatentSpace_v4	Folium-tuber vermis (VII)	vermal VIIAf	8	0.9848383699827078
LatentSpace_v4	Pyramus (VIII)	vermal VIIIA	18	0.9558593866410006
LatentSpace_v4	Uvula (IX)	vermal IX	7	0.8712183219778245
LatentSpace_v4	Nodulus (X)	vermal X	1	1
LatentSpace_v4	Simple lobule	VI	7	0.9340119613744589
LatentSpace_v4	Crus 1	crus I	12	0.9836476058463904
LatentSpace_v4	Crus 2	crus II	3	0.9904935808006978
LatentSpace_v4	Paramedian lobule	VIIB	8	0.9839384519847747
LatentSpace_v4	Copula pyramidis	VIIIA	22	0.9346864731988321
LatentSpace_v4	Flocculus	X	3	0.9264263321496563
LatentSpace_v4	Paraflocculus	IX	14	0.9212567979583148
LatentSpace_v4	Cerebellar nuclei	cerebellar nuclei	1	1
LatentSpace_v5	Cortical subplate-other	amygdala	1	1
LatentSpace_v5	Claustrum	claustrum	1	1
LatentSpace_v5	Piriform area	piriform cortex	3	0.9788096721753251
LatentSpace_v5	Subiculum	subiculum	1	1
LatentSpace_v5	Field CA1	CA1 field	1	1
LatentSpace_v5	Field CA2	CA2 field	2	0.9916956047935972
LatentSpace_v5	Field CA3	CA3 field	2	0.9243739238993268
LatentSpace_v5	Dentate gyrus	dentate gyrus	2	0.9559618273142368
LatentSpace_v5	Anterior cingulate area	cingulate gyrus	3	0.9829492474266421
LatentSpace_v5	Primary auditory area	Heschl's gyrus	10	0.9596564310929779
LatentSpace_v5	Primary motor area	precentral gyrus	2	0.9866001277524634
LatentSpace_v5	Primary somatosensory area	postcentral gyrus	1	1
LatentSpace_v5	Visual areas	cuneus	32	0.8359398684780888
LatentSpace_v5	Pallidum	globus pallidus	11	0.7499158524860641
LatentSpace_v5	Striatum ventral region	nucleus accumbens	1	1
LatentSpace_v5	Caudoputamen	caudate nucleus	1	1
LatentSpace_v5	Hypothalamus	hypothalamus	1	1
LatentSpace_v5	Thalamus	thalamus	1	1
LatentSpace_v5	Inferior colliculus	inferior colliculus	1	1
LatentSpace_v5	Superior colliculus	superior colliculus	1	1
LatentSpace_v5	Pons	pons	1	1
LatentSpace_v5	Medulla	myelencephalon	2	0.9634480974933998
LatentSpace_v5	Lingula (I)	vermal I-II	5	0.9245552320903067
LatentSpace_v5	Declive (VI)	vermal VI	19	0.9459220867958444
LatentSpace_v5	Folium-tuber vermis (VII)	vermal VIIAf	19	0.9548228625962748
LatentSpace_v5	Pyramus (VIII)	vermal VIIIA	17	0.957447983599928
LatentSpace_v5	Uvula (IX)	vermal IX	4	0.973359016137678
LatentSpace_v5	Nodulus (X)	vermal X	1	1
LatentSpace_v5	Simple lobule	VI	13	0.8945398331244855
LatentSpace_v5	Crus 1	crus I	11	0.9151937342070424
LatentSpace_v5	Crus 2	crus II	4	0.9451625744063484
LatentSpace_v5	Paramedian lobule	VIIB	10	0.9534486743710208
LatentSpace_v5	Copula pyramidis	VIIIA	5	0.9899451286949053
LatentSpace_v5	Flocculus	X	3	0.9831771346003333
LatentSpace_v5	Paraflocculus	IX	19	0.8952511317014769
LatentSpace_v5	Cerebellar nuclei	cerebellar nuclei	1	1
LatentSpace_v6	Cortical subplate-other	amygdala	1	1
LatentSpace_v6	Claustrum	claustrum	1	1
LatentSpace_v6	Piriform area	piriform cortex	1	1
LatentSpace_v6	Subiculum	subiculum	1	1
LatentSpace_v6	Field CA1	CA1 field	1	1
LatentSpace_v6	Field CA2	CA2 field	2	0.9474129509705134
LatentSpace_v6	Field CA3	CA3 field	1	1
LatentSpace_v6	Dentate gyrus	dentate gyrus	5	0.9529876061838165
LatentSpace_v6	Anterior cingulate area	cingulate gyrus	3	0.9782421628192283
LatentSpace_v6	Primary auditory area	Heschl's gyrus	12	0.9393867388706293
LatentSpace_v6	Primary motor area	precentral gyrus	2	0.9827787365774453
LatentSpace_v6	Primary somatosensory area	postcentral gyrus	7	0.9602809535892652
LatentSpace_v6	Visual areas	cuneus	16	0.8996558012003804
LatentSpace_v6	Pallidum	globus pallidus	18	0.612878237748121
LatentSpace_v6	Striatum ventral region	nucleus accumbens	1	1
LatentSpace_v6	Caudoputamen	caudate nucleus	1	1
LatentSpace_v6	Hypothalamus	hypothalamus	1	1
LatentSpace_v6	Thalamus	thalamus	1	1
LatentSpace_v6	Inferior colliculus	inferior colliculus	1	1
LatentSpace_v6	Superior colliculus	superior colliculus	1	1
LatentSpace_v6	Pons	pons	1	1
LatentSpace_v6	Medulla	myelencephalon	3	0.9963798864314509
LatentSpace_v6	Lingula (I)	vermal I-II	4	0.9076901118780124
LatentSpace_v6	Declive (VI)	vermal VI	20	0.960519849659531
LatentSpace_v6	Folium-tuber vermis (VII)	vermal VIIAf	7	0.9873136817565598
LatentSpace_v6	Pyramus (VIII)	vermal VIIIA	8	0.9451814821929563
LatentSpace_v6	Uvula (IX)	vermal IX	9	0.8490510632699083
LatentSpace_v6	Nodulus (X)	vermal X	1	1
LatentSpace_v6	Simple lobule	VI	6	0.9702549648688836
LatentSpace_v6	Crus 1	crus I	9	0.9764391060198833
LatentSpace_v6	Crus 2	crus II	2	0.9821170454561057
LatentSpace_v6	Paramedian lobule	VIIB	8	0.9819265454162738
LatentSpace_v6	Copula pyramidis	VIIIA	24	0.8969887459204103
LatentSpace_v6	Flocculus	X	8	0.926232675951235
LatentSpace_v6	Paraflocculus	IX	24	0.8891404409337212
LatentSpace_v6	Cerebellar nuclei	cerebellar nuclei	1	1
LatentSpace_v7	Cortical subplate-other	amygdala	1	1
LatentSpace_v7	Claustrum	claustrum	4	0.9782643298678946
LatentSpace_v7	Piriform area	piriform cortex	1	1
LatentSpace_v7	Subiculum	subiculum	1	1
LatentSpace_v7	Field CA1	CA1 field	1	1
LatentSpace_v7	Field CA2	CA2 field	2	0.9480971825605037
LatentSpace_v7	Field CA3	CA3 field	2	0.9810572777853356
LatentSpace_v7	Dentate gyrus	dentate gyrus	6	0.8722692013050498
LatentSpace_v7	Anterior cingulate area	cingulate gyrus	5	0.9758593068485578
LatentSpace_v7	Primary auditory area	Heschl's gyrus	3	0.9920213297336777
LatentSpace_v7	Primary motor area	precentral gyrus	3	0.9905666455962024
LatentSpace_v7	Primary somatosensory area	postcentral gyrus	9	0.9640431293528097
LatentSpace_v7	Visual areas	cuneus	16	0.9427249200503582
LatentSpace_v7	Pallidum	globus pallidus	7	0.780800274245736
LatentSpace_v7	Striatum ventral region	nucleus accumbens	1	1
LatentSpace_v7	Caudoputamen	caudate nucleus	1	1
LatentSpace_v7	Hypothalamus	hypothalamus	1	1
LatentSpace_v7	Thalamus	thalamus	1	1
LatentSpace_v7	Inferior colliculus	inferior colliculus	1	1
LatentSpace_v7	Superior colliculus	superior colliculus	1	1
LatentSpace_v7	Pons	pons	1	1
LatentSpace_v7	Medulla	myelencephalon	2	0.9874539883282283
LatentSpace_v7	Lingula (I)	vermal I-II	8	0.8093886883682012
LatentSpace_v7	Declive (VI)	vermal VI	21	0.8969964736369048
LatentSpace_v7	Folium-tuber vermis (VII)	vermal VIIAf	14	0.9741771913067132
LatentSpace_v7	Pyramus (VIII)	vermal VIIIA	18	0.9317299550885006
LatentSpace_v7	Uvula (IX)	vermal IX	17	0.8120433913040732
LatentSpace_v7	Nodulus (X)	vermal X	6	0.9332495276788882
LatentSpace_v7	Simple lobule	VI	14	0.8932693853490857
LatentSpace_v7	Crus 1	crus I	11	0.9240026724559836
LatentSpace_v7	Crus 2	crus II	4	0.959839142152967
LatentSpace_v7	Paramedian lobule	VIIB	10	0.9799747062759953
LatentSpace_v7	Copula pyramidis	VIIIA	18	0.9324297106343186
LatentSpace_v7	Flocculus	X	5	0.8896992635179563
LatentSpace_v7	Paraflocculus	IX	22	0.9181361391684913
LatentSpace_v7	Cerebellar nuclei	cerebellar nuclei	1	1
LatentSpace_v8	Cortical subplate-other	amygdala	1	1
LatentSpace_v8	Claustrum	claustrum	1	1
LatentSpace_v8	Piriform area	piriform cortex	2	0.957183134236748
LatentSpace_v8	Subiculum	subiculum	1	1
LatentSpace_v8	Field CA1	CA1 field	1	1
LatentSpace_v8	Field CA2	CA2 field	3	0.9067790458670552
LatentSpace_v8	Field CA3	CA3 field	2	0.9998203993571686
LatentSpace_v8	Dentate gyrus	dentate gyrus	1	1
LatentSpace_v8	Anterior cingulate area	cingulate gyrus	2	0.9959753399054885
LatentSpace_v8	Primary auditory area	Heschl's gyrus	15	0.9642399338491169
LatentSpace_v8	Primary motor area	precentral gyrus	10	0.9822034622737235
LatentSpace_v8	Primary somatosensory area	postcentral gyrus	8	0.9802975770317512
LatentSpace_v8	Visual areas	cuneus	31	0.9090976391492963
LatentSpace_v8	Pallidum	globus pallidus	11	0.7480309940796844
LatentSpace_v8	Striatum ventral region	nucleus accumbens	1	1
LatentSpace_v8	Caudoputamen	caudate nucleus	1	1
LatentSpace_v8	Hypothalamus	hypothalamus	1	1
LatentSpace_v8	Thalamus	thalamus	1	1
LatentSpace_v8	Inferior colliculus	inferior colliculus	1	1
LatentSpace_v8	Superior colliculus	superior colliculus	1	1
LatentSpace_v8	Pons	pons	1	1
LatentSpace_v8	Medulla	myelencephalon	2	0.9949182359975817
LatentSpace_v8	Lingula (I)	vermal I-II	1	1
LatentSpace_v8	Declive (VI)	vermal VI	12	0.9838675784569538
LatentSpace_v8	Folium-tuber vermis (VII)	vermal VIIAf	14	0.9667260364257838
LatentSpace_v8	Pyramus (VIII)	vermal VIIIA	12	0.9451677716557937
LatentSpace_v8	Uvula (IX)	vermal IX	8	0.8630096125309393
LatentSpace_v8	Nodulus (X)	vermal X	1	1
LatentSpace_v8	Simple lobule	VI	4	0.9703365729918048
LatentSpace_v8	Crus 1	crus I	10	0.9805561585421619
LatentSpace_v8	Crus 2	crus II	4	0.9625610542895298
LatentSpace_v8	Paramedian lobule	VIIB	8	0.9395615533151918
LatentSpace_v8	Copula pyramidis	VIIIA	17	0.9095350188123281
LatentSpace_v8	Flocculus	X	7	0.880447938475161
LatentSpace_v8	Paraflocculus	IX	6	0.9091664658948209
LatentSpace_v8	Cerebellar nuclei	cerebellar nuclei	1	1
LatentSpace_v9	Cortical subplate-other	amygdala	2	0.996460200543651
LatentSpace_v9	Claustrum	claustrum	8	0.9596102625938668
LatentSpace_v9	Piriform area	piriform cortex	2	0.9990854651227212
LatentSpace_v9	Subiculum	subiculum	1	1
LatentSpace_v9	Field CA1	CA1 field	1	1
LatentSpace_v9	Field CA2	CA2 field	2	0.8932338639115266
LatentSpace_v9	Field CA3	CA3 field	2	0.975354443683584
LatentSpace_v9	Dentate gyrus	dentate gyrus	3	0.9523792510746601
LatentSpace_v9	Anterior cingulate area	cingulate gyrus	3	0.9726933471800165
LatentSpace_v9	Primary auditory area	Heschl's gyrus	7	0.9734495881012063
LatentSpace_v9	Primary motor area	precentral gyrus	2	0.9911414143871583
LatentSpace_v9	Primary somatosensory area	postcentral gyrus	6	0.9897761626083497
LatentSpace_v9	Visual areas	cuneus	21	0.9248719462597154
LatentSpace_v9	Pallidum	globus pallidus	9	0.7943012141375653
LatentSpace_v9	Striatum ventral region	nucleus accumbens	1	1
LatentSpace_v9	Caudoputamen	caudate nucleus	1	1
LatentSpace_v9	Hypothalamus	hypothalamus	1	1
LatentSpace_v9	Thalamus	thalamus	1	1
LatentSpace_v9	Inferior colliculus	inferior colliculus	2	0.9479447554630775
LatentSpace_v9	Superior colliculus	superior colliculus	1	1
LatentSpace_v9	Pons	pons	1	1
LatentSpace_v9	Medulla	myelencephalon	1	1
LatentSpace_v9	Lingula (I)	vermal I-II	13	0.6950842169263777
LatentSpace_v9	Declive (VI)	vermal VI	21	0.9370613494376527
LatentSpace_v9	Folium-tuber vermis (VII)	vermal VIIAf	20	0.9463795314854587
LatentSpace_v9	Pyramus (VIII)	vermal VIIIA	19	0.8953828737290553
LatentSpace_v9	Uvula (IX)	vermal IX	16	0.738083268758658
LatentSpace_v9	Nodulus (X)	vermal X	4	0.8862734297274216
LatentSpace_v9	Simple lobule	VI	14	0.9189250307288748
LatentSpace_v9	Crus 1	crus I	15	0.9542387924403174
LatentSpace_v9	Crus 2	crus II	7	0.9860248171663928
LatentSpace_v9	Paramedian lobule	VIIB	16	0.9697043602321589
LatentSpace_v9	Copula pyramidis	VIIIA	22	0.8646539181270377
LatentSpace_v9	Flocculus	X	3	0.9088946888908944
LatentSpace_v9	Paraflocculus	IX	19	0.8647432516470585
LatentSpace_v9	Cerebellar nuclei	cerebellar nuclei	1	1
LatentSpace_v10	Cortical subplate-other	amygdala	1	1
LatentSpace_v10	Claustrum	claustrum	17	0.8783842807311155
LatentSpace_v10	Piriform area	piriform cortex	2	0.9931196110726632
LatentSpace_v10	Subiculum	subiculum	1	1
LatentSpace_v10	Field CA1	CA1 field	1	1
LatentSpace_v10	Field CA2	CA2 field	2	0.9482381272120027
LatentSpace_v10	Field CA3	CA3 field	2	0.9826601878692287
LatentSpace_v10	Dentate gyrus	dentate gyrus	2	0.9787313116164614
LatentSpace_v10	Anterior cingulate area	cingulate gyrus	4	0.9682655664850458
LatentSpace_v10	Primary auditory area	Heschl's gyrus	5	0.982298448952938
LatentSpace_v10	Primary motor area	precentral gyrus	2	0.9799473164584984
LatentSpace_v10	Primary somatosensory area	postcentral gyrus	7	0.9795673704446584
LatentSpace_v10	Visual areas	cuneus	11	0.9784553375192871
LatentSpace_v10	Pallidum	globus pallidus	15	0.7068456750935131
LatentSpace_v10	Striatum ventral region	nucleus accumbens	1	1
LatentSpace_v10	Caudoputamen	caudate nucleus	1	1
LatentSpace_v10	Hypothalamus	hypothalamus	1	1
LatentSpace_v10	Thalamus	thalamus	1	1
LatentSpace_v10	Inferior colliculus	inferior colliculus	1	1
LatentSpace_v10	Superior colliculus	superior colliculus	1	1
LatentSpace_v10	Pons	pons	1	1
LatentSpace_v10	Medulla	myelencephalon	1	1
LatentSpace_v10	Lingula (I)	vermal I-II	7	0.8459334740890045
LatentSpace_v10	Declive (VI)	vermal VI	20	0.9608450410881679
LatentSpace_v10	Folium-tuber vermis (VII)	vermal VIIAf	4	0.9972875396234184
LatentSpace_v10	Pyramus (VIII)	vermal VIIIA	15	0.9624785791696768
LatentSpace_v10	Uvula (IX)	vermal IX	7	0.8416270729853533
LatentSpace_v10	Nodulus (X)	vermal X	1	1
LatentSpace_v10	Simple lobule	VI	8	0.9562131000423634
LatentSpace_v10	Crus 1	crus I	12	0.9764496923313835
LatentSpace_v10	Crus 2	crus II	4	0.9797921435499044
LatentSpace_v10	Paramedian lobule	VIIB	13	0.9813512076511199
LatentSpace_v10	Copula pyramidis	VIIIA	23	0.8841339469764848
LatentSpace_v10	Flocculus	X	3	0.9149648988056622
LatentSpace_v10	Paraflocculus	IX	21	0.8699971976895879
LatentSpace_v10	Cerebellar nuclei	cerebellar nuclei	1	1
LatentSpace_v11	Cortical subplate-other	amygdala	1	1
LatentSpace_v11	Claustrum	claustrum	1	1
LatentSpace_v11	Piriform area	piriform cortex	1	1
LatentSpace_v11	Subiculum	subiculum	1	1
LatentSpace_v11	Field CA1	CA1 field	1	1
LatentSpace_v11	Field CA2	CA2 field	3	0.9883038214556691
LatentSpace_v11	Field CA3	CA3 field	2	0.9678274776556497
LatentSpace_v11	Dentate gyrus	dentate gyrus	6	0.8715385143235229
LatentSpace_v11	Anterior cingulate area	cingulate gyrus	2	0.9915786629905118
LatentSpace_v11	Primary auditory area	Heschl's gyrus	11	0.970040420628262
LatentSpace_v11	Primary motor area	precentral gyrus	2	0.9833020422148511
LatentSpace_v11	Primary somatosensory area	postcentral gyrus	3	0.987704490233291
LatentSpace_v11	Visual areas	cuneus	23	0.8963860449387889
LatentSpace_v11	Pallidum	globus pallidus	15	0.6620000876934449
LatentSpace_v11	Striatum ventral region	nucleus accumbens	1	1
LatentSpace_v11	Caudoputamen	caudate nucleus	1	1
LatentSpace_v11	Hypothalamus	hypothalamus	1	1
LatentSpace_v11	Thalamus	thalamus	1	1
LatentSpace_v11	Inferior colliculus	inferior colliculus	1	1
LatentSpace_v11	Superior colliculus	superior colliculus	1	1
LatentSpace_v11	Pons	pons	1	1
LatentSpace_v11	Medulla	myelencephalon	1	1
LatentSpace_v11	Lingula (I)	vermal I-II	2	0.9844002980722639
LatentSpace_v11	Declive (VI)	vermal VI	19	0.9541880974361764
LatentSpace_v11	Folium-tuber vermis (VII)	vermal VIIAf	10	0.9762816836592141
LatentSpace_v11	Pyramus (VIII)	vermal VIIIA	12	0.9638282050422824
LatentSpace_v11	Uvula (IX)	vermal IX	7	0.8847355268493491
LatentSpace_v11	Nodulus (X)	vermal X	1	1
LatentSpace_v11	Simple lobule	VI	7	0.9351348626874384
LatentSpace_v11	Crus 1	crus I	11	0.9644876437866153
LatentSpace_v11	Crus 2	crus II	7	0.9648432161555456
LatentSpace_v11	Paramedian lobule	VIIB	10	0.9710174694585467
LatentSpace_v11	Copula pyramidis	VIIIA	20	0.9508303425421044
LatentSpace_v11	Flocculus	X	2	0.9826091216527699
LatentSpace_v11	Paraflocculus	IX	20	0.9530742165649507
LatentSpace_v11	Cerebellar nuclei	cerebellar nuclei	1	1
LatentSpace_v12	Cortical subplate-other	amygdala	1	1
LatentSpace_v12	Claustrum	claustrum	4	0.9764259667404981
LatentSpace_v12	Piriform area	piriform cortex	1	1
LatentSpace_v12	Subiculum	subiculum	1	1
LatentSpace_v12	Field CA1	CA1 field	1	1
LatentSpace_v12	Field CA2	CA2 field	2	0.9339595164711645
LatentSpace_v12	Field CA3	CA3 field	3	0.9757684275932319
LatentSpace_v12	Dentate gyrus	dentate gyrus	5	0.951210146366239
LatentSpace_v12	Anterior cingulate area	cingulate gyrus	3	0.9719914511975837
LatentSpace_v12	Primary auditory area	Heschl's gyrus	2	0.9967240799185723
LatentSpace_v12	Primary motor area	precentral gyrus	2	0.9858311427894726
LatentSpace_v12	Primary somatosensory area	postcentral gyrus	8	0.9739011780053285
LatentSpace_v12	Visual areas	cuneus	15	0.9285379811082837
LatentSpace_v12	Pallidum	globus pallidus	17	0.5996534674867227
LatentSpace_v12	Striatum ventral region	nucleus accumbens	1	1
LatentSpace_v12	Caudoputamen	caudate nucleus	1	1
LatentSpace_v12	Hypothalamus	hypothalamus	1	1
LatentSpace_v12	Thalamus	thalamus	2	0.9601228498442244
LatentSpace_v12	Inferior colliculus	inferior colliculus	1	1
LatentSpace_v12	Superior colliculus	superior colliculus	1	1
LatentSpace_v12	Pons	pons	1	1
LatentSpace_v12	Medulla	myelencephalon	3	0.9863489917103164
LatentSpace_v12	Lingula (I)	vermal I-II	3	0.8950787888166811
LatentSpace_v12	Declive (VI)	vermal VI	10	0.9528642588545757
LatentSpace_v12	Folium-tuber vermis (VII)	vermal VIIAf	13	0.9790176859303997
LatentSpace_v12	Pyramus (VIII)	vermal VIIIA	20	0.9447126415965116
LatentSpace_v12	Uvula (IX)	vermal IX	10	0.8668473300580455
LatentSpace_v12	Nodulus (X)	vermal X	2	0.9812703283319494
LatentSpace_v12	Simple lobule	VI	8	0.888484432540091
LatentSpace_v12	Crus 1	crus I	15	0.949881084786061
LatentSpace_v12	Crus 2	crus II	7	0.9741558499357197
LatentSpace_v12	Paramedian lobule	VIIB	8	0.9766454252971695
LatentSpace_v12	Copula pyramidis	VIIIA	22	0.9437658100480554
LatentSpace_v12	Flocculus	X	2	0.9662641681295465
LatentSpace_v12	Paraflocculus	IX	4	0.9583923929785207
LatentSpace_v12	Cerebellar nuclei	cerebellar nuclei	1	1
LatentSpace_v13	Cortical subplate-other	amygdala	1	1
LatentSpace_v13	Claustrum	claustrum	1	1
LatentSpace_v13	Piriform area	piriform cortex	2	0.9811569583986965
LatentSpace_v13	Subiculum	subiculum	1	1
LatentSpace_v13	Field CA1	CA1 field	1	1
LatentSpace_v13	Field CA2	CA2 field	5	0.9170584576108329
LatentSpace_v13	Field CA3	CA3 field	1	1
LatentSpace_v13	Dentate gyrus	dentate gyrus	3	0.9578066769881414
LatentSpace_v13	Anterior cingulate area	cingulate gyrus	2	0.9941248732155205
LatentSpace_v13	Primary auditory area	Heschl's gyrus	6	0.9652786842672033
LatentSpace_v13	Primary motor area	precentral gyrus	4	0.9893602578860534
LatentSpace_v13	Primary somatosensory area	postcentral gyrus	6	0.9876766234956329
LatentSpace_v13	Visual areas	cuneus	19	0.9042001837366244
LatentSpace_v13	Pallidum	globus pallidus	10	0.6957111252467651
LatentSpace_v13	Striatum ventral region	nucleus accumbens	1	1
LatentSpace_v13	Caudoputamen	caudate nucleus	1	1
LatentSpace_v13	Hypothalamus	hypothalamus	1	1
LatentSpace_v13	Thalamus	thalamus	1	1
LatentSpace_v13	Inferior colliculus	inferior colliculus	2	0.9984913321292788
LatentSpace_v13	Superior colliculus	superior colliculus	1	1
LatentSpace_v13	Pons	pons	1	1
LatentSpace_v13	Medulla	myelencephalon	2	0.9726195937176456
LatentSpace_v13	Lingula (I)	vermal I-II	9	0.8190190570677661
LatentSpace_v13	Declive (VI)	vermal VI	16	0.9478617253783822
LatentSpace_v13	Folium-tuber vermis (VII)	vermal VIIAf	12	0.9606163209738137
LatentSpace_v13	Pyramus (VIII)	vermal VIIIA	19	0.8691945234523779
LatentSpace_v13	Uvula (IX)	vermal IX	19	0.7687366811467239
LatentSpace_v13	Nodulus (X)	vermal X	4	0.941986269127482
LatentSpace_v13	Simple lobule	VI	6	0.9261680955708872
LatentSpace_v13	Crus 1	crus I	12	0.9685512271851763
LatentSpace_v13	Crus 2	crus II	2	0.9765202721369124
LatentSpace_v13	Paramedian lobule	VIIB	8	0.9788676751672625
LatentSpace_v13	Copula pyramidis	VIIIA	21	0.8821314970234876
LatentSpace_v13	Flocculus	X	8	0.9035323529586442
LatentSpace_v13	Paraflocculus	IX	22	0.8191335641195742
LatentSpace_v13	Cerebellar nuclei	cerebellar nuclei	1	1
LatentSpace_v14	Cortical subplate-other	amygdala	1	1
LatentSpace_v14	Claustrum	claustrum	1	1
LatentSpace_v14	Piriform area	piriform cortex	1	1
LatentSpace_v14	Subiculum	subiculum	2	0.9909914493446065
LatentSpace_v14	Field CA1	CA1 field	1	1
LatentSpace_v14	Field CA2	CA2 field	2	0.9142347770245937
LatentSpace_v14	Field CA3	CA3 field	1	1
LatentSpace_v14	Dentate gyrus	dentate gyrus	3	0.9644607960404888
LatentSpace_v14	Anterior cingulate area	cingulate gyrus	2	0.9984120987253607
LatentSpace_v14	Primary auditory area	Heschl's gyrus	8	0.974057873698533
LatentSpace_v14	Primary motor area	precentral gyrus	5	0.9908556036222066
LatentSpace_v14	Primary somatosensory area	postcentral gyrus	8	0.9917421917952254
LatentSpace_v14	Visual areas	cuneus	21	0.924084611682472
LatentSpace_v14	Pallidum	globus pallidus	22	0.5331994521114253
LatentSpace_v14	Striatum ventral region	nucleus accumbens	1	1
LatentSpace_v14	Caudoputamen	caudate nucleus	1	1
LatentSpace_v14	Hypothalamus	hypothalamus	1	1
LatentSpace_v14	Thalamus	thalamus	3	0.9167892747074471
LatentSpace_v14	Inferior colliculus	inferior colliculus	1	1
LatentSpace_v14	Superior colliculus	superior colliculus	1	1
LatentSpace_v14	Pons	pons	1	1
LatentSpace_v14	Medulla	myelencephalon	1	1
LatentSpace_v14	Lingula (I)	vermal I-II	4	0.8813090289202419
LatentSpace_v14	Declive (VI)	vermal VI	19	0.9302251613469427
LatentSpace_v14	Folium-tuber vermis (VII)	vermal VIIAf	21	0.9655128765292879
LatentSpace_v14	Pyramus (VIII)	vermal VIIIA	11	0.9705346896314778
LatentSpace_v14	Uvula (IX)	vermal IX	6	0.8472346448001213
LatentSpace_v14	Nodulus (X)	vermal X	1	1
LatentSpace_v14	Simple lobule	VI	9	0.9074642470512847
LatentSpace_v14	Crus 1	crus I	16	0.9400277896942559
LatentSpace_v14	Crus 2	crus II	6	0.9552625604558315
LatentSpace_v14	Paramedian lobule	VIIB	10	0.9643764932155368
LatentSpace_v14	Copula pyramidis	VIIIA	22	0.891618682976443
LatentSpace_v14	Flocculus	X	5	0.9388853889906864
LatentSpace_v14	Paraflocculus	IX	2	0.9523187344743588
LatentSpace_v14	Cerebellar nuclei	cerebellar nuclei	1	1
LatentSpace_v15	Cortical subplate-other	amygdala	2	0.9984601721303498
LatentSpace_v15	Claustrum	claustrum	7	0.9404517012650457
LatentSpace_v15	Piriform area	piriform cortex	2	0.988076987896075
LatentSpace_v15	Subiculum	subiculum	1	1
LatentSpace_v15	Field CA1	CA1 field	1	1
LatentSpace_v15	Field CA2	CA2 field	2	0.9994033255579002
LatentSpace_v15	Field CA3	CA3 field	1	1
LatentSpace_v15	Dentate gyrus	dentate gyrus	3	0.9931822951997593
LatentSpace_v15	Anterior cingulate area	cingulate gyrus	3	0.9883566072191976
LatentSpace_v15	Primary auditory area	Heschl's gyrus	17	0.9607235221982882
LatentSpace_v15	Primary motor area	precentral gyrus	4	0.9892222084001356
LatentSpace_v15	Primary somatosensory area	postcentral gyrus	5	0.9894789317572172
LatentSpace_v15	Visual areas	cuneus	27	0.9131717669643449
LatentSpace_v15	Pallidum	globus pallidus	9	0.7152908257059339
LatentSpace_v15	Striatum ventral region	nucleus accumbens	1	1
LatentSpace_v15	Caudoputamen	caudate nucleus	1	1
LatentSpace_v15	Hypothalamus	hypothalamus	1	1
LatentSpace_v15	Thalamus	thalamus	1	1
LatentSpace_v15	Inferior colliculus	inferior colliculus	1	1
LatentSpace_v15	Superior colliculus	superior colliculus	1	1
LatentSpace_v15	Pons	pons	1	1
LatentSpace_v15	Medulla	myelencephalon	2	0.9982197486564619
LatentSpace_v15	Lingula (I)	vermal I-II	2	0.9873586473016711
LatentSpace_v15	Declive (VI)	vermal VI	19	0.9556559845244138
LatentSpace_v15	Folium-tuber vermis (VII)	vermal VIIAf	20	0.967028129646224
LatentSpace_v15	Pyramus (VIII)	vermal VIIIA	10	0.9573882567564859
LatentSpace_v15	Uvula (IX)	vermal IX	8	0.8522972341692571
LatentSpace_v15	Nodulus (X)	vermal X	1	1
LatentSpace_v15	Simple lobule	VI	7	0.9507931572858391
LatentSpace_v15	Crus 1	crus I	15	0.9740722019623225
LatentSpace_v15	Crus 2	crus II	4	0.9799778728558247
LatentSpace_v15	Paramedian lobule	VIIB	8	0.9756921599854816
LatentSpace_v15	Copula pyramidis	VIIIA	21	0.915931764653119
LatentSpace_v15	Flocculus	X	2	0.9360804488693503
LatentSpace_v15	Paraflocculus	IX	12	0.9298521353918447
LatentSpace_v15	Cerebellar nuclei	cerebellar nuclei	2	0.9556735698558381
LatentSpace_v16	Cortical subplate-other	amygdala	1	1
LatentSpace_v16	Claustrum	claustrum	1	1
LatentSpace_v16	Piriform area	piriform cortex	1	1
LatentSpace_v16	Subiculum	subiculum	1	1
LatentSpace_v16	Field CA1	CA1 field	1	1
LatentSpace_v16	Field CA2	CA2 field	2	0.9861798777912809
LatentSpace_v16	Field CA3	CA3 field	1	1
LatentSpace_v16	Dentate gyrus	dentate gyrus	6	0.9129926921041813
LatentSpace_v16	Anterior cingulate area	cingulate gyrus	3	0.9905887444096333
LatentSpace_v16	Primary auditory area	Heschl's gyrus	4	0.9665423371894936
LatentSpace_v16	Primary motor area	precentral gyrus	2	0.9856506367677513
LatentSpace_v16	Primary somatosensory area	postcentral gyrus	7	0.9858340217624716
LatentSpace_v16	Visual areas	cuneus	14	0.9395039427094973
LatentSpace_v16	Pallidum	globus pallidus	12	0.7068560090530025
LatentSpace_v16	Striatum ventral region	nucleus accumbens	1	1
LatentSpace_v16	Caudoputamen	caudate nucleus	1	1
LatentSpace_v16	Hypothalamus	hypothalamus	1	1
LatentSpace_v16	Thalamus	thalamus	1	1
LatentSpace_v16	Inferior colliculus	inferior colliculus	1	1
LatentSpace_v16	Superior colliculus	superior colliculus	1	1
LatentSpace_v16	Pons	pons	1	1
LatentSpace_v16	Medulla	myelencephalon	2	0.9887713877846458
LatentSpace_v16	Lingula (I)	vermal I-II	8	0.8405502522324138
LatentSpace_v16	Declive (VI)	vermal VI	12	0.9707830279054409
LatentSpace_v16	Folium-tuber vermis (VII)	vermal VIIAf	11	0.9218266585658598
LatentSpace_v16	Pyramus (VIII)	vermal VIIIA	17	0.8314960215606264
LatentSpace_v16	Uvula (IX)	vermal IX	14	0.7445014951415234
LatentSpace_v16	Nodulus (X)	vermal X	1	1
LatentSpace_v16	Simple lobule	VI	7	0.9373556245105208
LatentSpace_v16	Crus 1	crus I	12	0.9768777802709738
LatentSpace_v16	Crus 2	crus II	4	0.9756425091743582
LatentSpace_v16	Paramedian lobule	VIIB	11	0.968781851831453
LatentSpace_v16	Copula pyramidis	VIIIA	21	0.8463551553290782
LatentSpace_v16	Flocculus	X	5	0.850489487657061
LatentSpace_v16	Paraflocculus	IX	24	0.7196319614555937
LatentSpace_v16	Cerebellar nuclei	cerebellar nuclei	1	1
LatentSpace_v17	Cortical subplate-other	amygdala	2	0.9659266452183628
LatentSpace_v17	Claustrum	claustrum	1	1
LatentSpace_v17	Piriform area	piriform cortex	1	1
LatentSpace_v17	Subiculum	subiculum	1	1
LatentSpace_v17	Field CA1	CA1 field	1	1
LatentSpace_v17	Field CA2	CA2 field	2	0.9167402930245401
LatentSpace_v17	Field CA3	CA3 field	2	0.9793817341504875
LatentSpace_v17	Dentate gyrus	dentate gyrus	6	0.8232376835473713
LatentSpace_v17	Anterior cingulate area	cingulate gyrus	10	0.9467937449573878
LatentSpace_v17	Primary auditory area	Heschl's gyrus	3	0.9963566999243467
LatentSpace_v17	Primary motor area	precentral gyrus	2	0.9864135907458806
LatentSpace_v17	Primary somatosensory area	postcentral gyrus	7	0.9673555773436052
LatentSpace_v17	Visual areas	cuneus	11	0.9623759853535753
LatentSpace_v17	Pallidum	globus pallidus	11	0.6712573231202329
LatentSpace_v17	Striatum ventral region	nucleus accumbens	1	1
LatentSpace_v17	Caudoputamen	caudate nucleus	1	1
LatentSpace_v17	Hypothalamus	hypothalamus	1	1
LatentSpace_v17	Thalamus	thalamus	1	1
LatentSpace_v17	Inferior colliculus	inferior colliculus	2	0.9661817795801736
LatentSpace_v17	Superior colliculus	superior colliculus	1	1
LatentSpace_v17	Pons	pons	1	1
LatentSpace_v17	Medulla	myelencephalon	3	0.9860903200030648
LatentSpace_v17	Lingula (I)	vermal I-II	3	0.9501065871954787
LatentSpace_v17	Declive (VI)	vermal VI	12	0.9830697714916975
LatentSpace_v17	Folium-tuber vermis (VII)	vermal VIIAf	5	0.9843123785407448
LatentSpace_v17	Pyramus (VIII)	vermal VIIIA	13	0.9370336150303727
LatentSpace_v17	Uvula (IX)	vermal IX	10	0.8429658027585964
LatentSpace_v17	Nodulus (X)	vermal X	1	1
LatentSpace_v17	Simple lobule	VI	4	0.9594481550975548
LatentSpace_v17	Crus 1	crus I	10	0.9778889124275586
LatentSpace_v17	Crus 2	crus II	6	0.94826131600069
LatentSpace_v17	Paramedian lobule	VIIB	15	0.9162927695342824
LatentSpace_v17	Copula pyramidis	VIIIA	20	0.8635553313133421
LatentSpace_v17	Flocculus	X	14	0.7353810112047896
LatentSpace_v17	Paraflocculus	IX	11	0.7121190359731188
LatentSpace_v17	Cerebellar nuclei	cerebellar nuclei	1	1
LatentSpace_v18	Cortical subplate-other	amygdala	1	1
LatentSpace_v18	Claustrum	claustrum	3	0.9906118018459703
LatentSpace_v18	Piriform area	piriform cortex	2	0.9921333399153539
LatentSpace_v18	Subiculum	subiculum	2	0.9917379235830881
LatentSpace_v18	Field CA1	CA1 field	1	1
LatentSpace_v18	Field CA2	CA2 field	3	0.8993042761032959
LatentSpace_v18	Field CA3	CA3 field	2	0.9901790419889078
LatentSpace_v18	Dentate gyrus	dentate gyrus	3	0.9581989019811329
LatentSpace_v18	Anterior cingulate area	cingulate gyrus	2	0.9968191582719584
LatentSpace_v18	Primary auditory area	Heschl's gyrus	7	0.9824911884367343
LatentSpace_v18	Primary motor area	precentral gyrus	2	0.9909008736444211
LatentSpace_v18	Primary somatosensory area	postcentral gyrus	4	0.9922527296819844
LatentSpace_v18	Visual areas	cuneus	17	0.9452610729186456
LatentSpace_v18	Pallidum	globus pallidus	14	0.6007034875439801
LatentSpace_v18	Striatum ventral region	nucleus accumbens	1	1
LatentSpace_v18	Caudoputamen	caudate nucleus	1	1
LatentSpace_v18	Hypothalamus	hypothalamus	1	1
LatentSpace_v18	Thalamus	thalamus	1	1
LatentSpace_v18	Inferior colliculus	inferior colliculus	2	0.9441862422852598
LatentSpace_v18	Superior colliculus	superior colliculus	1	1
LatentSpace_v18	Pons	pons	1	1
LatentSpace_v18	Medulla	myelencephalon	2	0.9997430661536372
LatentSpace_v18	Lingula (I)	vermal I-II	3	0.9314908595063022
LatentSpace_v18	Declive (VI)	vermal VI	20	0.9763886470802482
LatentSpace_v18	Folium-tuber vermis (VII)	vermal VIIAf	16	0.9804190508956873
LatentSpace_v18	Pyramus (VIII)	vermal VIIIA	20	0.9321871713178309
LatentSpace_v18	Uvula (IX)	vermal IX	7	0.8465337183008445
LatentSpace_v18	Nodulus (X)	vermal X	1	1
LatentSpace_v18	Simple lobule	VI	5	0.9630056900758123
LatentSpace_v18	Crus 1	crus I	12	0.9745864193526277
LatentSpace_v18	Crus 2	crus II	7	0.9616923942386947
LatentSpace_v18	Paramedian lobule	VIIB	9	0.9456739468305274
LatentSpace_v18	Copula pyramidis	VIIIA	16	0.9211604747997476
LatentSpace_v18	Flocculus	X	7	0.9393979880105261
LatentSpace_v18	Paraflocculus	IX	7	0.9456866463935918
LatentSpace_v18	Cerebellar nuclei	cerebellar nuclei	2	0.9873594465742421
LatentSpace_v19	Cortical subplate-other	amygdala	1	1
LatentSpace_v19	Claustrum	claustrum	1	1
LatentSpace_v19	Piriform area	piriform cortex	1	1
LatentSpace_v19	Subiculum	subiculum	1	1
LatentSpace_v19	Field CA1	CA1 field	1	1
LatentSpace_v19	Field CA2	CA2 field	2	0.9208691247372894
LatentSpace_v19	Field CA3	CA3 field	2	0.985229520349318
LatentSpace_v19	Dentate gyrus	dentate gyrus	2	0.9673000860993939
LatentSpace_v19	Anterior cingulate area	cingulate gyrus	4	0.9901839664214346
LatentSpace_v19	Primary auditory area	Heschl's gyrus	15	0.9545283804123972
LatentSpace_v19	Primary motor area	precentral gyrus	5	0.9847559298365963
LatentSpace_v19	Primary somatosensory area	postcentral gyrus	5	0.9928055786587517
LatentSpace_v19	Visual areas	cuneus	14	0.9319338102141178
LatentSpace_v19	Pallidum	globus pallidus	11	0.6947910299379403
LatentSpace_v19	Striatum ventral region	nucleus accumbens	1	1
LatentSpace_v19	Caudoputamen	caudate nucleus	1	1
LatentSpace_v19	Hypothalamus	hypothalamus	1	1
LatentSpace_v19	Thalamus	thalamus	1	1
LatentSpace_v19	Inferior colliculus	inferior colliculus	2	0.8518971214674989
LatentSpace_v19	Superior colliculus	superior colliculus	2	0.9987333429999533
LatentSpace_v19	Pons	pons	1	1
LatentSpace_v19	Medulla	myelencephalon	2	0.9963930589528128
LatentSpace_v19	Lingula (I)	vermal I-II	5	0.8650992164654651
LatentSpace_v19	Declive (VI)	vermal VI	21	0.9544347106962953
LatentSpace_v19	Folium-tuber vermis (VII)	vermal VIIAf	3	0.9938212535530859
LatentSpace_v19	Pyramus (VIII)	vermal VIIIA	15	0.9480122096644319
LatentSpace_v19	Uvula (IX)	vermal IX	10	0.891335536769267
LatentSpace_v19	Nodulus (X)	vermal X	1	1
LatentSpace_v19	Simple lobule	VI	5	0.9538684549452504
LatentSpace_v19	Crus 1	crus I	15	0.9604020536225858
LatentSpace_v19	Crus 2	crus II	6	0.9700932845447127
LatentSpace_v19	Paramedian lobule	VIIB	12	0.9617421637503437
LatentSpace_v19	Copula pyramidis	VIIIA	21	0.9575492339797345
LatentSpace_v19	Flocculus	X	4	0.927599591674252
LatentSpace_v19	Paraflocculus	IX	9	0.9681971142717901
LatentSpace_v19	Cerebellar nuclei	cerebellar nuclei	1	1
LatentSpace_v20	Cortical subplate-other	amygdala	1	1
LatentSpace_v20	Claustrum	claustrum	4	0.9777432851052337
LatentSpace_v20	Piriform area	piriform cortex	1	1
LatentSpace_v20	Subiculum	subiculum	1	1
LatentSpace_v20	Field CA1	CA1 field	1	1
LatentSpace_v20	Field CA2	CA2 field	3	0.9230140886793976
LatentSpace_v20	Field CA3	CA3 field	2	0.9841820697817736
LatentSpace_v20	Dentate gyrus	dentate gyrus	2	0.9839109149809331
LatentSpace_v20	Anterior cingulate area	cingulate gyrus	2	0.9895978490468842
LatentSpace_v20	Primary auditory area	Heschl's gyrus	3	0.9792593408766256
LatentSpace_v20	Primary motor area	precentral gyrus	2	0.9874047983239854
LatentSpace_v20	Primary somatosensory area	postcentral gyrus	7	0.9884530898803993
LatentSpace_v20	Visual areas	cuneus	10	0.9751006921583661
LatentSpace_v20	Pallidum	globus pallidus	10	0.7017028114399022
LatentSpace_v20	Striatum ventral region	nucleus accumbens	1	1
LatentSpace_v20	Caudoputamen	caudate nucleus	1	1
LatentSpace_v20	Hypothalamus	hypothalamus	1	1
LatentSpace_v20	Thalamus	thalamus	1	1
LatentSpace_v20	Inferior colliculus	inferior colliculus	1	1
LatentSpace_v20	Superior colliculus	superior colliculus	2	0.9858395937160181
LatentSpace_v20	Pons	pons	1	1
LatentSpace_v20	Medulla	myelencephalon	1	1
LatentSpace_v20	Lingula (I)	vermal I-II	13	0.6690106600306396
LatentSpace_v20	Declive (VI)	vermal VI	20	0.9149109642581392
LatentSpace_v20	Folium-tuber vermis (VII)	vermal VIIAf	15	0.9443685850254674
LatentSpace_v20	Pyramus (VIII)	vermal VIIIA	13	0.925309298636539
LatentSpace_v20	Uvula (IX)	vermal IX	6	0.8430269515495823
LatentSpace_v20	Nodulus (X)	vermal X	1	1
LatentSpace_v20	Simple lobule	VI	10	0.8786177426125373
LatentSpace_v20	Crus 1	crus I	16	0.9293987672371217
LatentSpace_v20	Crus 2	crus II	8	0.9809699307855255
LatentSpace_v20	Paramedian lobule	VIIB	11	0.9863361487950019
LatentSpace_v20	Copula pyramidis	VIIIA	22	0.9397411813763163
LatentSpace_v20	Flocculus	X	3	0.9275653939758591
LatentSpace_v20	Paraflocculus	IX	22	0.8560468175881941
LatentSpace_v20	Cerebellar nuclei	cerebellar nuclei	1	1
LatentSpace_v21	Cortical subplate-other	amygdala	2	0.9821053852972695
LatentSpace_v21	Claustrum	claustrum	2	0.9910179699193368
LatentSpace_v21	Piriform area	piriform cortex	3	0.970218185000979
LatentSpace_v21	Subiculum	subiculum	1	1
LatentSpace_v21	Field CA1	CA1 field	1	1
LatentSpace_v21	Field CA2	CA2 field	3	0.8870774485675491
LatentSpace_v21	Field CA3	CA3 field	2	0.9855026906754782
LatentSpace_v21	Dentate gyrus	dentate gyrus	3	0.9675075501205924
LatentSpace_v21	Anterior cingulate area	cingulate gyrus	4	0.9800829851826037
LatentSpace_v21	Primary auditory area	Heschl's gyrus	3	0.9744842722841885
LatentSpace_v21	Primary motor area	precentral gyrus	2	0.984973211559442
LatentSpace_v21	Primary somatosensory area	postcentral gyrus	2	0.9910285141644526
LatentSpace_v21	Visual areas	cuneus	14	0.9547606258737263
LatentSpace_v21	Pallidum	globus pallidus	11	0.7134712113605042
LatentSpace_v21	Striatum ventral region	nucleus accumbens	1	1
LatentSpace_v21	Caudoputamen	caudate nucleus	1	1
LatentSpace_v21	Hypothalamus	hypothalamus	1	1
LatentSpace_v21	Thalamus	thalamus	1	1
LatentSpace_v21	Inferior colliculus	inferior colliculus	1	1
LatentSpace_v21	Superior colliculus	superior colliculus	1	1
LatentSpace_v21	Pons	pons	1	1
LatentSpace_v21	Medulla	myelencephalon	3	0.959555997254507
LatentSpace_v21	Lingula (I)	vermal I-II	5	0.9563123618073178
LatentSpace_v21	Declive (VI)	vermal VI	19	0.9666109139257261
LatentSpace_v21	Folium-tuber vermis (VII)	vermal VIIAf	13	0.9757931932299044
LatentSpace_v21	Pyramus (VIII)	vermal VIIIA	16	0.8975261978977878
LatentSpace_v21	Uvula (IX)	vermal IX	18	0.8248782539945076
LatentSpace_v21	Nodulus (X)	vermal X	2	0.984333961966044
LatentSpace_v21	Simple lobule	VI	7	0.9794712852461087
LatentSpace_v21	Crus 1	crus I	9	0.9624588591496109
LatentSpace_v21	Crus 2	crus II	3	0.9596558399841401
LatentSpace_v21	Paramedian lobule	VIIB	8	0.9088860679516096
LatentSpace_v21	Copula pyramidis	VIIIA	12	0.8340951975949604
LatentSpace_v21	Flocculus	X	7	0.8941419460163685
LatentSpace_v21	Paraflocculus	IX	22	0.8235883517739749
LatentSpace_v21	Cerebellar nuclei	cerebellar nuclei	1	1
LatentSpace_v22	Cortical subplate-other	amygdala	1	1
LatentSpace_v22	Claustrum	claustrum	1	1
LatentSpace_v22	Piriform area	piriform cortex	2	0.990487643973221
LatentSpace_v22	Subiculum	subiculum	1	1
LatentSpace_v22	Field CA1	CA1 field	1	1
LatentSpace_v22	Field CA2	CA2 field	3	0.9013708857242989
LatentSpace_v22	Field CA3	CA3 field	2	0.9792813058001961
LatentSpace_v22	Dentate gyrus	dentate gyrus	6	0.8618437349449531
LatentSpace_v22	Anterior cingulate area	cingulate gyrus	2	0.9901800204400913
LatentSpace_v22	Primary auditory area	Heschl's gyrus	8	0.9641732003926651
LatentSpace_v22	Primary motor area	precentral gyrus	2	0.9881570784375651
LatentSpace_v22	Primary somatosensory area	postcentral gyrus	5	0.9903703786526055
LatentSpace_v22	Visual areas	cuneus	14	0.9237990298508156
LatentSpace_v22	Pallidum	globus pallidus	8	0.6816490909170722
LatentSpace_v22	Striatum ventral region	nucleus accumbens	1	1
LatentSpace_v22	Caudoputamen	caudate nucleus	1	1
LatentSpace_v22	Hypothalamus	hypothalamus	1	1
LatentSpace_v22	Thalamus	thalamus	1	1
LatentSpace_v22	Inferior colliculus	inferior colliculus	1	1
LatentSpace_v22	Superior colliculus	superior colliculus	1	1
LatentSpace_v22	Pons	pons	1	1
LatentSpace_v22	Medulla	myelencephalon	1	1
LatentSpace_v22	Lingula (I)	vermal I-II	9	0.8720552633691215
LatentSpace_v22	Declive (VI)	vermal VI	19	0.9116892835666222
LatentSpace_v22	Folium-tuber vermis (VII)	vermal VIIAf	21	0.9387250431939143
LatentSpace_v22	Pyramus (VIII)	vermal VIIIA	13	0.9594527745281384
LatentSpace_v22	Uvula (IX)	vermal IX	13	0.8431008652083222
LatentSpace_v22	Nodulus (X)	vermal X	4	0.9678816494189262
LatentSpace_v22	Simple lobule	VI	12	0.9258325208932017
LatentSpace_v22	Crus 1	crus I	12	0.9287649456261671
LatentSpace_v22	Crus 2	crus II	3	0.9719474158071028
LatentSpace_v22	Paramedian lobule	VIIB	9	0.9931770543279294
LatentSpace_v22	Copula pyramidis	VIIIA	22	0.9030704278886422
LatentSpace_v22	Flocculus	X	3	0.9146541673945731
LatentSpace_v22	Paraflocculus	IX	23	0.9222657680031241
LatentSpace_v22	Cerebellar nuclei	cerebellar nuclei	1	1
LatentSpace_v23	Cortical subplate-other	amygdala	1	1
LatentSpace_v23	Claustrum	claustrum	1	1
LatentSpace_v23	Piriform area	piriform cortex	5	0.900224636360978
LatentSpace_v23	Subiculum	subiculum	1	1
LatentSpace_v23	Field CA1	CA1 field	1	1
LatentSpace_v23	Field CA2	CA2 field	2	0.9194319911730334
LatentSpace_v23	Field CA3	CA3 field	2	0.9946257618726273
LatentSpace_v23	Dentate gyrus	dentate gyrus	6	0.9440989581815588
LatentSpace_v23	Anterior cingulate area	cingulate gyrus	1	1
LatentSpace_v23	Primary auditory area	Heschl's gyrus	4	0.9761490545832838
LatentSpace_v23	Primary motor area	precentral gyrus	3	0.9806680193206045
LatentSpace_v23	Primary somatosensory area	postcentral gyrus	4	0.9886424713301352
LatentSpace_v23	Visual areas	cuneus	12	0.9416696659961611
LatentSpace_v23	Pallidum	globus pallidus	15	0.6036437088734942
LatentSpace_v23	Striatum ventral region	nucleus accumbens	1	1
LatentSpace_v23	Caudoputamen	caudate nucleus	1	1
LatentSpace_v23	Hypothalamus	hypothalamus	1	1
LatentSpace_v23	Thalamus	thalamus	1	1
LatentSpace_v23	Inferior colliculus	inferior colliculus	1	1
LatentSpace_v23	Superior colliculus	superior colliculus	2	0.9797103012938342
LatentSpace_v23	Pons	pons	1	1
LatentSpace_v23	Medulla	myelencephalon	3	0.9779269752473922
LatentSpace_v23	Lingula (I)	vermal I-II	5	0.8908314529848181
LatentSpace_v23	Declive (VI)	vermal VI	21	0.8921220926186412
LatentSpace_v23	Folium-tuber vermis (VII)	vermal VIIAf	10	0.9710514099748644
LatentSpace_v23	Pyramus (VIII)	vermal VIIIA	18	0.9501192354397953
LatentSpace_v23	Uvula (IX)	vermal IX	12	0.8712307832707726
LatentSpace_v23	Nodulus (X)	vermal X	5	0.9413004279071185
LatentSpace_v23	Simple lobule	VI	11	0.9447760205640976
LatentSpace_v23	Crus 1	crus I	12	0.9462329152382413
LatentSpace_v23	Crus 2	crus II	4	0.9805381314800274
LatentSpace_v23	Paramedian lobule	VIIB	12	0.9877014783974506
LatentSpace_v23	Copula pyramidis	VIIIA	23	0.931113893354273
LatentSpace_v23	Flocculus	X	1	1
LatentSpace_v23	Paraflocculus	IX	6	0.9753966873071493
LatentSpace_v23	Cerebellar nuclei	cerebellar nuclei	1	1
LatentSpace_v24	Cortical subplate-other	amygdala	1	1
LatentSpace_v24	Claustrum	claustrum	6	0.8939096193828628
LatentSpace_v24	Piriform area	piriform cortex	1	1
LatentSpace_v24	Subiculum	subiculum	1	1
LatentSpace_v24	Field CA1	CA1 field	1	1
LatentSpace_v24	Field CA2	CA2 field	2	0.9628763379946957
LatentSpace_v24	Field CA3	CA3 field	2	0.99103880906218
LatentSpace_v24	Dentate gyrus	dentate gyrus	8	0.8856705023631725
LatentSpace_v24	Anterior cingulate area	cingulate gyrus	2	0.9993189388449869
LatentSpace_v24	Primary auditory area	Heschl's gyrus	9	0.9670721300275781
LatentSpace_v24	Primary motor area	precentral gyrus	4	0.9878825549023794
LatentSpace_v24	Primary somatosensory area	postcentral gyrus	8	0.9661098382848522
LatentSpace_v24	Visual areas	cuneus	18	0.9218128439840398
LatentSpace_v24	Pallidum	globus pallidus	11	0.716987735457255
LatentSpace_v24	Striatum ventral region	nucleus accumbens	1	1
LatentSpace_v24	Caudoputamen	caudate nucleus	1	1
LatentSpace_v24	Hypothalamus	hypothalamus	1	1
LatentSpace_v24	Thalamus	thalamus	1	1
LatentSpace_v24	Inferior colliculus	inferior colliculus	1	1
LatentSpace_v24	Superior colliculus	superior colliculus	1	1
LatentSpace_v24	Pons	pons	1	1
LatentSpace_v24	Medulla	myelencephalon	3	0.9813124515836155
LatentSpace_v24	Lingula (I)	vermal I-II	10	0.8574228496817885
LatentSpace_v24	Declive (VI)	vermal VI	19	0.9755443199854584
LatentSpace_v24	Folium-tuber vermis (VII)	vermal VIIAf	9	0.9893723961683758
LatentSpace_v24	Pyramus (VIII)	vermal VIIIA	18	0.9644037746342428
LatentSpace_v24	Uvula (IX)	vermal IX	17	0.8865789697203644
LatentSpace_v24	Nodulus (X)	vermal X	1	1
LatentSpace_v24	Simple lobule	VI	5	0.9649293435268008
LatentSpace_v24	Crus 1	crus I	10	0.9819587013147941
LatentSpace_v24	Crus 2	crus II	3	0.991725266125793
LatentSpace_v24	Paramedian lobule	VIIB	7	0.985708976275174
LatentSpace_v24	Copula pyramidis	VIIIA	22	0.9506203224930431
LatentSpace_v24	Flocculus	X	1	1
LatentSpace_v24	Paraflocculus	IX	14	0.939820600975402
LatentSpace_v24	Cerebellar nuclei	cerebellar nuclei	1	1
LatentSpace_v25	Cortical subplate-other	amygdala	1	1
LatentSpace_v25	Claustrum	claustrum	1	1
LatentSpace_v25	Piriform area	piriform cortex	1	1
LatentSpace_v25	Subiculum	subiculum	1	1
LatentSpace_v25	Field CA1	CA1 field	1	1
LatentSpace_v25	Field CA2	CA2 field	2	0.919420002082426
LatentSpace_v25	Field CA3	CA3 field	2	0.9974294638115077
LatentSpace_v25	Dentate gyrus	dentate gyrus	5	0.9413224938897446
LatentSpace_v25	Anterior cingulate area	cingulate gyrus	3	0.9902663298855832
LatentSpace_v25	Primary auditory area	Heschl's gyrus	7	0.9725070547789193
LatentSpace_v25	Primary motor area	precentral gyrus	2	0.988280345031282
LatentSpace_v25	Primary somatosensory area	postcentral gyrus	7	0.9838007500670722
LatentSpace_v25	Visual areas	cuneus	21	0.8950075929687149
LatentSpace_v25	Pallidum	globus pallidus	14	0.6578567722099943
LatentSpace_v25	Striatum ventral region	nucleus accumbens	1	1
LatentSpace_v25	Caudoputamen	caudate nucleus	1	1
LatentSpace_v25	Hypothalamus	hypothalamus	1	1
LatentSpace_v25	Thalamus	thalamus	3	0.9428776028139136
LatentSpace_v25	Inferior colliculus	inferior colliculus	1	1
LatentSpace_v25	Superior colliculus	superior colliculus	1	1
LatentSpace_v25	Pons	pons	1	1
LatentSpace_v25	Medulla	myelencephalon	1	1
LatentSpace_v25	Lingula (I)	vermal I-II	5	0.9446917698530743
LatentSpace_v25	Declive (VI)	vermal VI	19	0.9574596430829115
LatentSpace_v25	Folium-tuber vermis (VII)	vermal VIIAf	6	0.9852599898620568
LatentSpace_v25	Pyramus (VIII)	vermal VIIIA	11	0.9674799008343384
LatentSpace_v25	Uvula (IX)	vermal IX	9	0.9307817409985742
LatentSpace_v25	Nodulus (X)	vermal X	1	1
LatentSpace_v25	Simple lobule	VI	10	0.9578048485976216
LatentSpace_v25	Crus 1	crus I	9	0.9395021294200282
LatentSpace_v25	Crus 2	crus II	3	0.9499393362796766
LatentSpace_v25	Paramedian lobule	VIIB	6	0.9540375122281448
LatentSpace_v25	Copula pyramidis	VIIIA	8	0.9628262965488489
LatentSpace_v25	Flocculus	X	4	0.9158701429285809
LatentSpace_v25	Paraflocculus	IX	17	0.9013155348541785
LatentSpace_v25	Cerebellar nuclei	cerebellar nuclei	1	1
LatentSpace_v26	Cortical subplate-other	amygdala	1	1
LatentSpace_v26	Claustrum	claustrum	1	1
LatentSpace_v26	Piriform area	piriform cortex	2	0.9841356103981277
LatentSpace_v26	Subiculum	subiculum	1	1
LatentSpace_v26	Field CA1	CA1 field	1	1
LatentSpace_v26	Field CA2	CA2 field	3	0.9310574954394385
LatentSpace_v26	Field CA3	CA3 field	1	1
LatentSpace_v26	Dentate gyrus	dentate gyrus	3	0.9668848677452311
LatentSpace_v26	Anterior cingulate area	cingulate gyrus	2	0.9977694333573471
LatentSpace_v26	Primary auditory area	Heschl's gyrus	8	0.9651363199193908
LatentSpace_v26	Primary motor area	precentral gyrus	2	0.9844353281429123
LatentSpace_v26	Primary somatosensory area	postcentral gyrus	3	0.9923184290111324
LatentSpace_v26	Visual areas	cuneus	12	0.9492936997384445
LatentSpace_v26	Pallidum	globus pallidus	15	0.5760033122552525
LatentSpace_v26	Striatum ventral region	nucleus accumbens	1	1
LatentSpace_v26	Caudoputamen	caudate nucleus	1	1
LatentSpace_v26	Hypothalamus	hypothalamus	1	1
LatentSpace_v26	Thalamus	thalamus	1	1
LatentSpace_v26	Inferior colliculus	inferior colliculus	2	0.9950931519081407
LatentSpace_v26	Superior colliculus	superior colliculus	1	1
LatentSpace_v26	Pons	pons	1	1
LatentSpace_v26	Medulla	myelencephalon	1	1
LatentSpace_v26	Lingula (I)	vermal I-II	12	0.7854209349445999
LatentSpace_v26	Declive (VI)	vermal VI	18	0.9473732086976943
LatentSpace_v26	Folium-tuber vermis (VII)	vermal VIIAf	7	0.979489297422681
LatentSpace_v26	Pyramus (VIII)	vermal VIIIA	19	0.9511688085635667
LatentSpace_v26	Uvula (IX)	vermal IX	8	0.8611337393165295
LatentSpace_v26	Nodulus (X)	vermal X	1	1
LatentSpace_v26	Simple lobule	VI	9	0.9200490455136116
LatentSpace_v26	Crus 1	crus I	15	0.9501962855960516
LatentSpace_v26	Crus 2	crus II	5	0.9677454377299175
LatentSpace_v26	Paramedian lobule	VIIB	6	0.9642749006295539
LatentSpace_v26	Copula pyramidis	VIIIA	17	0.9327848052017353
LatentSpace_v26	Flocculus	X	6	0.9343089428222956
LatentSpace_v26	Paraflocculus	IX	14	0.920904574223244
LatentSpace_v26	Cerebellar nuclei	cerebellar nuclei	1	1
LatentSpace_v27	Cortical subplate-other	amygdala	2	0.9889217667728394
LatentSpace_v27	Claustrum	claustrum	20	0.8366657616278623
LatentSpace_v27	Piriform area	piriform cortex	1	1
LatentSpace_v27	Subiculum	subiculum	1	1
LatentSpace_v27	Field CA1	CA1 field	1	1
LatentSpace_v27	Field CA2	CA2 field	2	0.9586224940335166
LatentSpace_v27	Field CA3	CA3 field	2	0.9998622830698576
LatentSpace_v27	Dentate gyrus	dentate gyrus	2	0.9863674946006525
LatentSpace_v27	Anterior cingulate area	cingulate gyrus	3	0.9911310697042472
LatentSpace_v27	Primary auditory area	Heschl's gyrus	15	0.9455404004134274
LatentSpace_v27	Primary motor area	precentral gyrus	2	0.9846232978926146
LatentSpace_v27	Primary somatosensory area	postcentral gyrus	8	0.9775661704113496
LatentSpace_v27	Visual areas	cuneus	23	0.8952650778798719
LatentSpace_v27	Pallidum	globus pallidus	12	0.6605047969436498
LatentSpace_v27	Striatum ventral region	nucleus accumbens	1	1
LatentSpace_v27	Caudoputamen	caudate nucleus	1	1
LatentSpace_v27	Hypothalamus	hypothalamus	1	1
LatentSpace_v27	Thalamus	thalamus	1	1
LatentSpace_v27	Inferior colliculus	inferior colliculus	1	1
LatentSpace_v27	Superior colliculus	superior colliculus	1	1
LatentSpace_v27	Pons	pons	1	1
LatentSpace_v27	Medulla	myelencephalon	2	0.9838956485875041
LatentSpace_v27	Lingula (I)	vermal I-II	1	1
LatentSpace_v27	Declive (VI)	vermal VI	18	0.9741567901750474
LatentSpace_v27	Folium-tuber vermis (VII)	vermal VIIAf	15	0.9773046556396111
LatentSpace_v27	Pyramus (VIII)	vermal VIIIA	10	0.9616593163362085
LatentSpace_v27	Uvula (IX)	vermal IX	11	0.8662715772439613
LatentSpace_v27	Nodulus (X)	vermal X	1	1
LatentSpace_v27	Simple lobule	VI	5	0.9716735408755712
LatentSpace_v27	Crus 1	crus I	10	0.9815105225136249
LatentSpace_v27	Crus 2	crus II	2	0.9679809296423724
LatentSpace_v27	Paramedian lobule	VIIB	4	0.9424535588670859
LatentSpace_v27	Copula pyramidis	VIIIA	22	0.9030472406880375
LatentSpace_v27	Flocculus	X	4	0.8991360917071609
LatentSpace_v27	Paraflocculus	IX	15	0.8336538318207711
LatentSpace_v27	Cerebellar nuclei	cerebellar nuclei	1	1
LatentSpace_v28	Cortical subplate-other	amygdala	1	1
LatentSpace_v28	Claustrum	claustrum	17	0.887085195402549
LatentSpace_v28	Piriform area	piriform cortex	1	1
LatentSpace_v28	Subiculum	subiculum	1	1
LatentSpace_v28	Field CA1	CA1 field	1	1
LatentSpace_v28	Field CA2	CA2 field	3	0.8885236550153769
LatentSpace_v28	Field CA3	CA3 field	2	0.9965365650667256
LatentSpace_v28	Dentate gyrus	dentate gyrus	2	0.9851108588834486
LatentSpace_v28	Anterior cingulate area	cingulate gyrus	1	1
LatentSpace_v28	Primary auditory area	Heschl's gyrus	7	0.9724749473036544
LatentSpace_v28	Primary motor area	precentral gyrus	6	0.9845828458236906
LatentSpace_v28	Primary somatosensory area	postcentral gyrus	4	0.9963387944561896
LatentSpace_v28	Visual areas	cuneus	18	0.9357837185372937
LatentSpace_v28	Pallidum	globus pallidus	12	0.7016726565381433
LatentSpace_v28	Striatum ventral region	nucleus accumbens	1	1
LatentSpace_v28	Caudoputamen	caudate nucleus	1	1
LatentSpace_v28	Hypothalamus	hypothalamus	1	1
LatentSpace_v28	Thalamus	thalamus	1	1
LatentSpace_v28	Inferior colliculus	inferior colliculus	1	1
LatentSpace_v28	Superior colliculus	superior colliculus	1	1
LatentSpace_v28	Pons	pons	1	1
LatentSpace_v28	Medulla	myelencephalon	2	0.9957755363143684
LatentSpace_v28	Lingula (I)	vermal I-II	12	0.617788936423298
LatentSpace_v28	Declive (VI)	vermal VI	14	0.9648485468498904
LatentSpace_v28	Folium-tuber vermis (VII)	vermal VIIAf	19	0.9549647714026522
LatentSpace_v28	Pyramus (VIII)	vermal VIIIA	13	0.8847021763196935
LatentSpace_v28	Uvula (IX)	vermal IX	18	0.7843757962928664
LatentSpace_v28	Nodulus (X)	vermal X	11	0.8309136520260543
LatentSpace_v28	Simple lobule	VI	9	0.9107800388063811
LatentSpace_v28	Crus 1	crus I	12	0.972176371963483
LatentSpace_v28	Crus 2	crus II	4	0.9805336176339048
LatentSpace_v28	Paramedian lobule	VIIB	15	0.962753411783949
LatentSpace_v28	Copula pyramidis	VIIIA	22	0.8736692429783102
LatentSpace_v28	Flocculus	X	11	0.8293909791733075
LatentSpace_v28	Paraflocculus	IX	17	0.8711904972046054
LatentSpace_v28	Cerebellar nuclei	cerebellar nuclei	1	1
LatentSpace_v29	Cortical subplate-other	amygdala	2	0.9869999031612091
LatentSpace_v29	Claustrum	claustrum	1	1
LatentSpace_v29	Piriform area	piriform cortex	1	1
LatentSpace_v29	Subiculum	subiculum	1	1
LatentSpace_v29	Field CA1	CA1 field	1	1
LatentSpace_v29	Field CA2	CA2 field	3	0.8760964554490009
LatentSpace_v29	Field CA3	CA3 field	1	1
LatentSpace_v29	Dentate gyrus	dentate gyrus	4	0.8804098609296553
LatentSpace_v29	Anterior cingulate area	cingulate gyrus	3	0.9859660423588796
LatentSpace_v29	Primary auditory area	Heschl's gyrus	5	0.9816545029047968
LatentSpace_v29	Primary motor area	precentral gyrus	2	0.9922005419677609
LatentSpace_v29	Primary somatosensory area	postcentral gyrus	3	0.99375074179376
LatentSpace_v29	Visual areas	cuneus	19	0.9330167080971894
LatentSpace_v29	Pallidum	globus pallidus	10	0.7143204338603685
LatentSpace_v29	Striatum ventral region	nucleus accumbens	1	1
LatentSpace_v29	Caudoputamen	caudate nucleus	1	1
LatentSpace_v29	Hypothalamus	hypothalamus	1	1
LatentSpace_v29	Thalamus	thalamus	1	1
LatentSpace_v29	Inferior colliculus	inferior colliculus	1	1
LatentSpace_v29	Superior colliculus	superior colliculus	1	1
LatentSpace_v29	Pons	pons	1	1
LatentSpace_v29	Medulla	myelencephalon	1	1
LatentSpace_v29	Lingula (I)	vermal I-II	11	0.9272237470960166
LatentSpace_v29	Declive (VI)	vermal VI	19	0.9686662387092206
LatentSpace_v29	Folium-tuber vermis (VII)	vermal VIIAf	13	0.9826227208222938
LatentSpace_v29	Pyramus (VIII)	vermal VIIIA	18	0.9310806554712395
LatentSpace_v29	Uvula (IX)	vermal IX	15	0.8445970268041316
LatentSpace_v29	Nodulus (X)	vermal X	1	1
LatentSpace_v29	Simple lobule	VI	5	0.9571594997085713
LatentSpace_v29	Crus 1	crus I	9	0.9821236210898082
LatentSpace_v29	Crus 2	crus II	4	0.9907822872301874
LatentSpace_v29	Paramedian lobule	VIIB	7	0.989771056908644
LatentSpace_v29	Copula pyramidis	VIIIA	22	0.8902535552594446
LatentSpace_v29	Flocculus	X	6	0.8864737147806774
LatentSpace_v29	Paraflocculus	IX	17	0.8795059101951314
LatentSpace_v29	Cerebellar nuclei	cerebellar nuclei	1	1
LatentSpace_v30	Cortical subplate-other	amygdala	2	0.9938751171899349
LatentSpace_v30	Claustrum	claustrum	1	1
LatentSpace_v30	Piriform area	piriform cortex	1	1
LatentSpace_v30	Subiculum	subiculum	1	1
LatentSpace_v30	Field CA1	CA1 field	1	1
LatentSpace_v30	Field CA2	CA2 field	3	0.8871486378138703
LatentSpace_v30	Field CA3	CA3 field	2	0.9901796456771002
LatentSpace_v30	Dentate gyrus	dentate gyrus	3	0.9773028300677664
LatentSpace_v30	Anterior cingulate area	cingulate gyrus	7	0.9720287765778458
LatentSpace_v30	Primary auditory area	Heschl's gyrus	9	0.9756747075436213
LatentSpace_v30	Primary motor area	precentral gyrus	2	0.9821968782156755
LatentSpace_v30	Primary somatosensory area	postcentral gyrus	7	0.9794256417123957
LatentSpace_v30	Visual areas	cuneus	20	0.9071817993605854
LatentSpace_v30	Pallidum	globus pallidus	18	0.6635048989289762
LatentSpace_v30	Striatum ventral region	nucleus accumbens	1	1
LatentSpace_v30	Caudoputamen	caudate nucleus	1	1
LatentSpace_v30	Hypothalamus	hypothalamus	1	1
LatentSpace_v30	Thalamus	thalamus	1	1
LatentSpace_v30	Inferior colliculus	inferior colliculus	1	1
LatentSpace_v30	Superior colliculus	superior colliculus	1	1
LatentSpace_v30	Pons	pons	1	1
LatentSpace_v30	Medulla	myelencephalon	1	1
LatentSpace_v30	Lingula (I)	vermal I-II	7	0.8763567769572127
LatentSpace_v30	Declive (VI)	vermal VI	18	0.9252126531885729
LatentSpace_v30	Folium-tuber vermis (VII)	vermal VIIAf	3	0.9784186415702149
LatentSpace_v30	Pyramus (VIII)	vermal VIIIA	13	0.9555346131096261
LatentSpace_v30	Uvula (IX)	vermal IX	5	0.9643014847515572
LatentSpace_v30	Nodulus (X)	vermal X	2	0.9891260530462525
LatentSpace_v30	Simple lobule	VI	6	0.9641666717696497
LatentSpace_v30	Crus 1	crus I	10	0.9590968245665152
LatentSpace_v30	Crus 2	crus II	4	0.9500147918471951
LatentSpace_v30	Paramedian lobule	VIIB	13	0.9335428403849271
LatentSpace_v30	Copula pyramidis	VIIIA	17	0.9176775483578645
LatentSpace_v30	Flocculus	X	6	0.8816635179786262
LatentSpace_v30	Paraflocculus	IX	13	0.8927546140032379
LatentSpace_v30	Cerebellar nuclei	cerebellar nuclei	1	1
LatentSpace_v31	Cortical subplate-other	amygdala	1	1
LatentSpace_v31	Claustrum	claustrum	1	1
LatentSpace_v31	Piriform area	piriform cortex	2	0.9524926276381024
LatentSpace_v31	Subiculum	subiculum	1	1
LatentSpace_v31	Field CA1	CA1 field	1	1
LatentSpace_v31	Field CA2	CA2 field	2	0.9746885729531093
LatentSpace_v31	Field CA3	CA3 field	2	0.9861050535631212
LatentSpace_v31	Dentate gyrus	dentate gyrus	6	0.8655000323550424
LatentSpace_v31	Anterior cingulate area	cingulate gyrus	1	1
LatentSpace_v31	Primary auditory area	Heschl's gyrus	9	0.9740549690439292
LatentSpace_v31	Primary motor area	precentral gyrus	2	0.9877137870507886
LatentSpace_v31	Primary somatosensory area	postcentral gyrus	8	0.9785961016717531
LatentSpace_v31	Visual areas	cuneus	13	0.9527408439477804
LatentSpace_v31	Pallidum	globus pallidus	14	0.6709244256402285
LatentSpace_v31	Striatum ventral region	nucleus accumbens	1	1
LatentSpace_v31	Caudoputamen	caudate nucleus	1	1
LatentSpace_v31	Hypothalamus	hypothalamus	1	1
LatentSpace_v31	Thalamus	thalamus	1	1
LatentSpace_v31	Inferior colliculus	inferior colliculus	2	0.9865173959191955
LatentSpace_v31	Superior colliculus	superior colliculus	1	1
LatentSpace_v31	Pons	pons	1	1
LatentSpace_v31	Medulla	myelencephalon	2	0.9965713522399882
LatentSpace_v31	Lingula (I)	vermal I-II	2	0.9044789433023466
LatentSpace_v31	Declive (VI)	vermal VI	21	0.9528137883056848
LatentSpace_v31	Folium-tuber vermis (VII)	vermal VIIAf	12	0.9772421915466438
LatentSpace_v31	Pyramus (VIII)	vermal VIIIA	13	0.9523801498439122
LatentSpace_v31	Uvula (IX)	vermal IX	12	0.8242958381485187
LatentSpace_v31	Nodulus (X)	vermal X	3	0.9685505454341858
LatentSpace_v31	Simple lobule	VI	6	0.9431150343497992
LatentSpace_v31	Crus 1	crus I	13	0.9740473326013448
LatentSpace_v31	Crus 2	crus II	3	0.990667229680233
LatentSpace_v31	Paramedian lobule	VIIB	11	0.9654074270959582
LatentSpace_v31	Copula pyramidis	VIIIA	22	0.9030453966451233
LatentSpace_v31	Flocculus	X	2	0.9329041857288505
LatentSpace_v31	Paraflocculus	IX	22	0.8566322574489564
LatentSpace_v31	Cerebellar nuclei	cerebellar nuclei	1	1
LatentSpace_v32	Cortical subplate-other	amygdala	1	1
LatentSpace_v32	Claustrum	claustrum	3	0.9818406464678298
LatentSpace_v32	Piriform area	piriform cortex	1	1
LatentSpace_v32	Subiculum	subiculum	1	1
LatentSpace_v32	Field CA1	CA1 field	1	1
LatentSpace_v32	Field CA2	CA2 field	3	0.9593573980835329
LatentSpace_v32	Field CA3	CA3 field	1	1
LatentSpace_v32	Dentate gyrus	dentate gyrus	1	1
LatentSpace_v32	Anterior cingulate area	cingulate gyrus	4	0.9853127018319338
LatentSpace_v32	Primary auditory area	Heschl's gyrus	11	0.9735405826509687
LatentSpace_v32	Primary motor area	precentral gyrus	2	0.9899826257849323
LatentSpace_v32	Primary somatosensory area	postcentral gyrus	5	0.9775002504560547
LatentSpace_v32	Visual areas	cuneus	21	0.9069269949746496
LatentSpace_v32	Pallidum	globus pallidus	16	0.6410827460587729
LatentSpace_v32	Striatum ventral region	nucleus accumbens	1	1
LatentSpace_v32	Caudoputamen	caudate nucleus	1	1
LatentSpace_v32	Hypothalamus	hypothalamus	1	1
LatentSpace_v32	Thalamus	thalamus	1	1
LatentSpace_v32	Inferior colliculus	inferior colliculus	1	1
LatentSpace_v32	Superior colliculus	superior colliculus	1	1
LatentSpace_v32	Pons	pons	1	1
LatentSpace_v32	Medulla	myelencephalon	3	0.9662834453228
LatentSpace_v32	Lingula (I)	vermal I-II	10	0.7899093914128427
LatentSpace_v32	Declive (VI)	vermal VI	17	0.950579527651054
LatentSpace_v32	Folium-tuber vermis (VII)	vermal VIIAf	13	0.9757994241707445
LatentSpace_v32	Pyramus (VIII)	vermal VIIIA	13	0.945756482659821
LatentSpace_v32	Uvula (IX)	vermal IX	20	0.8416399138102146
LatentSpace_v32	Nodulus (X)	vermal X	8	0.8786146459924397
LatentSpace_v32	Simple lobule	VI	5	0.9499844771543596
LatentSpace_v32	Crus 1	crus I	9	0.9856766245651459
LatentSpace_v32	Crus 2	crus II	4	0.9925662255474981
LatentSpace_v32	Paramedian lobule	VIIB	9	0.9831344090969402
LatentSpace_v32	Copula pyramidis	VIIIA	22	0.9274708789223371
LatentSpace_v32	Flocculus	X	7	0.9360088727100305
LatentSpace_v32	Paraflocculus	IX	20	0.8911514390506152
LatentSpace_v32	Cerebellar nuclei	cerebellar nuclei	2	0.9865424381305329
LatentSpace_v33	Cortical subplate-other	amygdala	2	0.9959012702169905
LatentSpace_v33	Claustrum	claustrum	1	1
LatentSpace_v33	Piriform area	piriform cortex	2	0.9764554509715441
LatentSpace_v33	Subiculum	subiculum	1	1
LatentSpace_v33	Field CA1	CA1 field	1	1
LatentSpace_v33	Field CA2	CA2 field	3	0.8593695923832525
LatentSpace_v33	Field CA3	CA3 field	3	0.9809079919876215
LatentSpace_v33	Dentate gyrus	dentate gyrus	12	0.6239581195855506
LatentSpace_v33	Anterior cingulate area	cingulate gyrus	1	1
LatentSpace_v33	Primary auditory area	Heschl's gyrus	5	0.9830342214367058
LatentSpace_v33	Primary motor area	precentral gyrus	6	0.9852558046084717
LatentSpace_v33	Primary somatosensory area	postcentral gyrus	8	0.9876354579425725
LatentSpace_v33	Visual areas	cuneus	21	0.9005993087789449
LatentSpace_v33	Pallidum	globus pallidus	16	0.7090150692250589
LatentSpace_v33	Striatum ventral region	nucleus accumbens	1	1
LatentSpace_v33	Caudoputamen	caudate nucleus	1	1
LatentSpace_v33	Hypothalamus	hypothalamus	1	1
LatentSpace_v33	Thalamus	thalamus	1	1
LatentSpace_v33	Inferior colliculus	inferior colliculus	1	1
LatentSpace_v33	Superior colliculus	superior colliculus	1	1
LatentSpace_v33	Pons	pons	1	1
LatentSpace_v33	Medulla	myelencephalon	2	0.9934534167783827
LatentSpace_v33	Lingula (I)	vermal I-II	9	0.8042093775040562
LatentSpace_v33	Declive (VI)	vermal VI	15	0.9745279580326597
LatentSpace_v33	Folium-tuber vermis (VII)	vermal VIIAf	22	0.9345526512545135
LatentSpace_v33	Pyramus (VIII)	vermal VIIIA	15	0.9090709652500873
LatentSpace_v33	Uvula (IX)	vermal IX	20	0.713163056461302
LatentSpace_v33	Nodulus (X)	vermal X	7	0.8937556272059751
LatentSpace_v33	Simple lobule	VI	8	0.9348070114003016
LatentSpace_v33	Crus 1	crus I	13	0.9733222562586463
LatentSpace_v33	Crus 2	crus II	3	0.9907146828156607
LatentSpace_v33	Paramedian lobule	VIIB	10	0.9567627158805668
LatentSpace_v33	Copula pyramidis	VIIIA	18	0.8766598892535067
LatentSpace_v33	Flocculus	X	3	0.9273818138915514
LatentSpace_v33	Paraflocculus	IX	5	0.9565669093478206
LatentSpace_v33	Cerebellar nuclei	cerebellar nuclei	1	1
LatentSpace_v34	Cortical subplate-other	amygdala	1	1
LatentSpace_v34	Claustrum	claustrum	5	0.9828853245307403
LatentSpace_v34	Piriform area	piriform cortex	1	1
LatentSpace_v34	Subiculum	subiculum	1	1
LatentSpace_v34	Field CA1	CA1 field	1	1
LatentSpace_v34	Field CA2	CA2 field	2	0.9554279257271105
LatentSpace_v34	Field CA3	CA3 field	2	0.9898778893988002
LatentSpace_v34	Dentate gyrus	dentate gyrus	6	0.9370216724498803
LatentSpace_v34	Anterior cingulate area	cingulate gyrus	2	0.9913668296202749
LatentSpace_v34	Primary auditory area	Heschl's gyrus	7	0.9669006572072665
LatentSpace_v34	Primary motor area	precentral gyrus	3	0.9852833072436967
LatentSpace_v34	Primary somatosensory area	postcentral gyrus	6	0.983823211119283
LatentSpace_v34	Visual areas	cuneus	18	0.9054139108048866
LatentSpace_v34	Pallidum	globus pallidus	10	0.7938376384903754
LatentSpace_v34	Striatum ventral region	nucleus accumbens	1	1
LatentSpace_v34	Caudoputamen	caudate nucleus	1	1
LatentSpace_v34	Hypothalamus	hypothalamus	1	1
LatentSpace_v34	Thalamus	thalamus	1	1
LatentSpace_v34	Inferior colliculus	inferior colliculus	1	1
LatentSpace_v34	Superior colliculus	superior colliculus	1	1
LatentSpace_v34	Pons	pons	1	1
LatentSpace_v34	Medulla	myelencephalon	2	0.9997461628024232
LatentSpace_v34	Lingula (I)	vermal I-II	4	0.9124723073687526
LatentSpace_v34	Declive (VI)	vermal VI	7	0.9839712259034142
LatentSpace_v34	Folium-tuber vermis (VII)	vermal VIIAf	14	0.9526505511300859
LatentSpace_v34	Pyramus (VIII)	vermal VIIIA	23	0.8889736594595825
LatentSpace_v34	Uvula (IX)	vermal IX	18	0.8222355481756795
LatentSpace_v34	Nodulus (X)	vermal X	1	1
LatentSpace_v34	Simple lobule	VI	5	0.9812810145637608
LatentSpace_v34	Crus 1	crus I	10	0.9641886366064603
LatentSpace_v34	Crus 2	crus II	4	0.9439300660036168
LatentSpace_v34	Paramedian lobule	VIIB	11	0.9320244274568019
LatentSpace_v34	Copula pyramidis	VIIIA	32	0.7870407281056028
LatentSpace_v34	Flocculus	X	8	0.9484063060407978
LatentSpace_v34	Paraflocculus	IX	12	0.9221990787639728
LatentSpace_v34	Cerebellar nuclei	cerebellar nuclei	1	1
LatentSpace_v35	Cortical subplate-other	amygdala	1	1
LatentSpace_v35	Claustrum	claustrum	5	0.9583192692828646
LatentSpace_v35	Piriform area	piriform cortex	1	1
LatentSpace_v35	Subiculum	subiculum	1	1
LatentSpace_v35	Field CA1	CA1 field	1	1
LatentSpace_v35	Field CA2	CA2 field	1	1
LatentSpace_v35	Field CA3	CA3 field	1	1
LatentSpace_v35	Dentate gyrus	dentate gyrus	1	1
LatentSpace_v35	Anterior cingulate area	cingulate gyrus	2	0.992079286311167
LatentSpace_v35	Primary auditory area	Heschl's gyrus	10	0.9605306500377263
LatentSpace_v35	Primary motor area	precentral gyrus	2	0.9851378557540298
LatentSpace_v35	Primary somatosensory area	postcentral gyrus	2	0.9978126115964496
LatentSpace_v35	Visual areas	cuneus	21	0.911231782621934
LatentSpace_v35	Pallidum	globus pallidus	15	0.5214944679763162
LatentSpace_v35	Striatum ventral region	nucleus accumbens	1	1
LatentSpace_v35	Caudoputamen	caudate nucleus	1	1
LatentSpace_v35	Hypothalamus	hypothalamus	1	1
LatentSpace_v35	Thalamus	thalamus	2	0.9820068531529819
LatentSpace_v35	Inferior colliculus	inferior colliculus	1	1
LatentSpace_v35	Superior colliculus	superior colliculus	1	1
LatentSpace_v35	Pons	pons	1	1
LatentSpace_v35	Medulla	myelencephalon	1	1
LatentSpace_v35	Lingula (I)	vermal I-II	1	1
LatentSpace_v35	Declive (VI)	vermal VI	18	0.9693692134541599
LatentSpace_v35	Folium-tuber vermis (VII)	vermal VIIAf	17	0.9757657052245193
LatentSpace_v35	Pyramus (VIII)	vermal VIIIA	12	0.9443698190230665
LatentSpace_v35	Uvula (IX)	vermal IX	5	0.8794383970430025
LatentSpace_v35	Nodulus (X)	vermal X	1	1
LatentSpace_v35	Simple lobule	VI	9	0.9498025546843977
LatentSpace_v35	Crus 1	crus I	8	0.9685162938984584
LatentSpace_v35	Crus 2	crus II	5	0.9869394512627944
LatentSpace_v35	Paramedian lobule	VIIB	11	0.9741695789307097
LatentSpace_v35	Copula pyramidis	VIIIA	22	0.9264698272485772
LatentSpace_v35	Flocculus	X	12	0.9007037707517709
LatentSpace_v35	Paraflocculus	IX	22	0.8666229564312661
LatentSpace_v35	Cerebellar nuclei	cerebellar nuclei	1	1
LatentSpace_v36	Cortical subplate-other	amygdala	1	1
LatentSpace_v36	Claustrum	claustrum	1	1
LatentSpace_v36	Piriform area	piriform cortex	1	1
LatentSpace_v36	Subiculum	subiculum	1	1
LatentSpace_v36	Field CA1	CA1 field	1	1
LatentSpace_v36	Field CA2	CA2 field	2	0.9127415469749908
LatentSpace_v36	Field CA3	CA3 field	2	0.9897745811704975
LatentSpace_v36	Dentate gyrus	dentate gyrus	2	0.9696880447630789
LatentSpace_v36	Anterior cingulate area	cingulate gyrus	3	0.970304567583263
LatentSpace_v36	Primary auditory area	Heschl's gyrus	2	0.9961571342634234
LatentSpace_v36	Primary motor area	precentral gyrus	2	0.9858368336286415
LatentSpace_v36	Primary somatosensory area	postcentral gyrus	6	0.9767142481574366
LatentSpace_v36	Visual areas	cuneus	19	0.9215133479942516
LatentSpace_v36	Pallidum	globus pallidus	18	0.4614358026908084
LatentSpace_v36	Striatum ventral region	nucleus accumbens	1	1
LatentSpace_v36	Caudoputamen	caudate nucleus	1	1
LatentSpace_v36	Hypothalamus	hypothalamus	1	1
LatentSpace_v36	Thalamus	thalamus	1	1
LatentSpace_v36	Inferior colliculus	inferior colliculus	2	0.965041829302285
LatentSpace_v36	Superior colliculus	superior colliculus	2	0.99486043079145825
LatentSpace_v36	Pons	pons	1	1
LatentSpace_v36	Medulla	myelencephalon	2	0.988095283139106
LatentSpace_v36	Lingula (I)	vermal I-II	4	0.8896802998948595
LatentSpace_v36	Declive (VI)	vermal VI	19	0.9632404733609116
LatentSpace_v36	Folium-tuber vermis (VII)	vermal VIIAf	18	0.9770787600954782
LatentSpace_v36	Pyramus (VIII)	vermal VIIIA	14	0.9490027157950649
LatentSpace_v36	Uvula (IX)	vermal IX	10	0.8473585549781911
LatentSpace_v36	Nodulus (X)	vermal X	3	0.952625343944571
LatentSpace_v36	Simple lobule	VI	7	0.9553093167393015
LatentSpace_v36	Crus 1	crus I	9	0.981166401717458
LatentSpace_v36	Crus 2	crus II	3	0.9903156016486814
LatentSpace_v36	Paramedian lobule	VIIB	8	0.9760298760521243
LatentSpace_v36	Copula pyramidis	VIIIA	22	0.9089243285811885
LatentSpace_v36	Flocculus	X	7	0.931278192275396
LatentSpace_v36	Paraflocculus	IX	6	0.941072852070055
LatentSpace_v36	Cerebellar nuclei	cerebellar nuclei	1	1
LatentSpace_v37	Cortical subplate-other	amygdala	1	1
LatentSpace_v37	Claustrum	claustrum	1	1
LatentSpace_v37	Piriform area	piriform cortex	1	1
LatentSpace_v37	Subiculum	subiculum	1	1
LatentSpace_v37	Field CA1	CA1 field	1	1
LatentSpace_v37	Field CA2	CA2 field	3	0.9165653495077989
LatentSpace_v37	Field CA3	CA3 field	2	0.9975994365657098
LatentSpace_v37	Dentate gyrus	dentate gyrus	2	0.9873501177999839
LatentSpace_v37	Anterior cingulate area	cingulate gyrus	4	0.9880699240050179
LatentSpace_v37	Primary auditory area	Heschl's gyrus	5	0.9847116991980399
LatentSpace_v37	Primary motor area	precentral gyrus	2	0.9950086950083884
LatentSpace_v37	Primary somatosensory area	postcentral gyrus	4	0.9907178287639791
LatentSpace_v37	Visual areas	cuneus	14	0.9340049089821949
LatentSpace_v37	Pallidum	globus pallidus	12	0.7256154857669205
LatentSpace_v37	Striatum ventral region	nucleus accumbens	1	1
LatentSpace_v37	Caudoputamen	caudate nucleus	1	1
LatentSpace_v37	Hypothalamus	hypothalamus	1	1
LatentSpace_v37	Thalamus	thalamus	1	1
LatentSpace_v37	Inferior colliculus	inferior colliculus	2	0.9889667198323205
LatentSpace_v37	Superior colliculus	superior colliculus	1	1
LatentSpace_v37	Pons	pons	2	0.9971052795767528
LatentSpace_v37	Medulla	myelencephalon	1	1
LatentSpace_v37	Lingula (I)	vermal I-II	3	0.9223858630804469
LatentSpace_v37	Declive (VI)	vermal VI	19	0.9630530050355964
LatentSpace_v37	Folium-tuber vermis (VII)	vermal VIIAf	8	0.9942290976200476
LatentSpace_v37	Pyramus (VIII)	vermal VIIIA	11	0.9690165645424347
LatentSpace_v37	Uvula (IX)	vermal IX	6	0.8958264260748843
LatentSpace_v37	Nodulus (X)	vermal X	3	0.9718644265277937
LatentSpace_v37	Simple lobule	VI	6	0.9707108569401549
LatentSpace_v37	Crus 1	crus I	9	0.966929526583664
LatentSpace_v37	Crus 2	crus II	4	0.96147460809464
LatentSpace_v37	Paramedian lobule	VIIB	11	0.9526777882772289
LatentSpace_v37	Copula pyramidis	VIIIA	20	0.924822535625139
LatentSpace_v37	Flocculus	X	7	0.9174617646382018
LatentSpace_v37	Paraflocculus	IX	5	0.9568126811864749
LatentSpace_v37	Cerebellar nuclei	cerebellar nuclei	1	1
LatentSpace_v38	Cortical subplate-other	amygdala	2	0.9969163544189866
LatentSpace_v38	Claustrum	claustrum	1	1
LatentSpace_v38	Piriform area	piriform cortex	7	0.9138528537699726
LatentSpace_v38	Subiculum	subiculum	1	1
LatentSpace_v38	Field CA1	CA1 field	1	1
LatentSpace_v38	Field CA2	CA2 field	3	0.905895227448848
LatentSpace_v38	Field CA3	CA3 field	2	0.9858215176097473
LatentSpace_v38	Dentate gyrus	dentate gyrus	5	0.9371549563210454
LatentSpace_v38	Anterior cingulate area	cingulate gyrus	3	0.9826122385043756
LatentSpace_v38	Primary auditory area	Heschl's gyrus	13	0.9683131424254386
LatentSpace_v38	Primary motor area	precentral gyrus	18	0.9561950817298522
LatentSpace_v38	Primary somatosensory area	postcentral gyrus	9	0.9864943798666723
LatentSpace_v38	Visual areas	cuneus	25	0.8841334662433946
LatentSpace_v38	Pallidum	globus pallidus	14	0.6389205925806559
LatentSpace_v38	Striatum ventral region	nucleus accumbens	1	1
LatentSpace_v38	Caudoputamen	caudate nucleus	1	1
LatentSpace_v38	Hypothalamus	hypothalamus	1	1
LatentSpace_v38	Thalamus	thalamus	1	1
LatentSpace_v38	Inferior colliculus	inferior colliculus	1	1
LatentSpace_v38	Superior colliculus	superior colliculus	1	1
LatentSpace_v38	Pons	pons	1	1
LatentSpace_v38	Medulla	myelencephalon	1	1
LatentSpace_v38	Lingula (I)	vermal I-II	3	0.9701500832364532
LatentSpace_v38	Declive (VI)	vermal VI	17	0.9784981314502778
LatentSpace_v38	Folium-tuber vermis (VII)	vermal VIIAf	6	0.99517429508094
LatentSpace_v38	Pyramus (VIII)	vermal VIIIA	15	0.9834599855884136
LatentSpace_v38	Uvula (IX)	vermal IX	5	0.931282318309991
LatentSpace_v38	Nodulus (X)	vermal X	1	1
LatentSpace_v38	Simple lobule	VI	8	0.9681467503450993
LatentSpace_v38	Crus 1	crus I	12	0.9652264809437879
LatentSpace_v38	Crus 2	crus II	4	0.9936247428121808
LatentSpace_v38	Paramedian lobule	VIIB	6	0.9931390297889167
LatentSpace_v38	Copula pyramidis	VIIIA	17	0.9790679044957229
LatentSpace_v38	Flocculus	X	2	0.9719054174923745
LatentSpace_v38	Paraflocculus	IX	9	0.9589627130692494
LatentSpace_v38	Cerebellar nuclei	cerebellar nuclei	1	1
LatentSpace_v39	Cortical subplate-other	amygdala	1	1
LatentSpace_v39	Claustrum	claustrum	1	1
LatentSpace_v39	Piriform area	piriform cortex	1	1
LatentSpace_v39	Subiculum	subiculum	1	1
LatentSpace_v39	Field CA1	CA1 field	1	1
LatentSpace_v39	Field CA2	CA2 field	3	0.9493536338981022
LatentSpace_v39	Field CA3	CA3 field	1	1
LatentSpace_v39	Dentate gyrus	dentate gyrus	4	0.9638567100980945
LatentSpace_v39	Anterior cingulate area	cingulate gyrus	4	0.9852240498332393
LatentSpace_v39	Primary auditory area	Heschl's gyrus	12	0.9620144521907417
LatentSpace_v39	Primary motor area	precentral gyrus	2	0.9862538019488568
LatentSpace_v39	Primary somatosensory area	postcentral gyrus	3	0.9845084422657521
LatentSpace_v39	Visual areas	cuneus	22	0.9014343635589033
LatentSpace_v39	Pallidum	globus pallidus	9	0.7935067782706127
LatentSpace_v39	Striatum ventral region	nucleus accumbens	1	1
LatentSpace_v39	Caudoputamen	caudate nucleus	1	1
LatentSpace_v39	Hypothalamus	hypothalamus	1	1
LatentSpace_v39	Thalamus	thalamus	1	1
LatentSpace_v39	Inferior colliculus	inferior colliculus	2	0.938018160040368
LatentSpace_v39	Superior colliculus	superior colliculus	1	1
LatentSpace_v39	Pons	pons	1	1
LatentSpace_v39	Medulla	myelencephalon	2	0.984677559962756
LatentSpace_v39	Lingula (I)	vermal I-II	1	1
LatentSpace_v39	Declive (VI)	vermal VI	19	0.9646586206477137
LatentSpace_v39	Folium-tuber vermis (VII)	vermal VIIAf	12	0.9865211092661297
LatentSpace_v39	Pyramus (VIII)	vermal VIIIA	11	0.9462537470597044
LatentSpace_v39	Uvula (IX)	vermal IX	7	0.8651062809164177
LatentSpace_v39	Nodulus (X)	vermal X	3	0.9926911846744961
LatentSpace_v39	Simple lobule	VI	9	0.9254844851973908
LatentSpace_v39	Crus 1	crus I	14	0.9643093324556293
LatentSpace_v39	Crus 2	crus II	6	0.9661319967074544
LatentSpace_v39	Paramedian lobule	VIIB	15	0.950613485578675
LatentSpace_v39	Copula pyramidis	VIIIA	22	0.8900138959465841
LatentSpace_v39	Flocculus	X	2	0.9607211262729252
LatentSpace_v39	Paraflocculus	IX	7	0.8941565005403639
LatentSpace_v39	Cerebellar nuclei	cerebellar nuclei	1	1
LatentSpace_v40	Cortical subplate-other	amygdala	2	0.9952055493140874
LatentSpace_v40	Claustrum	claustrum	1	1
LatentSpace_v40	Piriform area	piriform cortex	1	1
LatentSpace_v40	Subiculum	subiculum	1	1
LatentSpace_v40	Field CA1	CA1 field	1	1
LatentSpace_v40	Field CA2	CA2 field	2	0.9901554629037508
LatentSpace_v40	Field CA3	CA3 field	2	0.9993606516382267
LatentSpace_v40	Dentate gyrus	dentate gyrus	5	0.9794665831382566
LatentSpace_v40	Anterior cingulate area	cingulate gyrus	14	0.9583096814217308
LatentSpace_v40	Primary auditory area	Heschl's gyrus	4	0.9786329846827575
LatentSpace_v40	Primary motor area	precentral gyrus	2	0.9890320246356645
LatentSpace_v40	Primary somatosensory area	postcentral gyrus	7	0.9747684191930398
LatentSpace_v40	Visual areas	cuneus	19	0.9015037260404206
LatentSpace_v40	Pallidum	globus pallidus	14	0.7374995672367539
LatentSpace_v40	Striatum ventral region	nucleus accumbens	1	1
LatentSpace_v40	Caudoputamen	caudate nucleus	1	1
LatentSpace_v40	Hypothalamus	hypothalamus	1	1
LatentSpace_v40	Thalamus	thalamus	1	1
LatentSpace_v40	Inferior colliculus	inferior colliculus	1	1
LatentSpace_v40	Superior colliculus	superior colliculus	1	1
LatentSpace_v40	Pons	pons	1	1
LatentSpace_v40	Medulla	myelencephalon	1	1
LatentSpace_v40	Lingula (I)	vermal I-II	7	0.9105451617539594
LatentSpace_v40	Declive (VI)	vermal VI	18	0.9629870577383799
LatentSpace_v40	Folium-tuber vermis (VII)	vermal VIIAf	16	0.9565516606643562
LatentSpace_v40	Pyramus (VIII)	vermal VIIIA	19	0.9145441826757155
LatentSpace_v40	Uvula (IX)	vermal IX	19	0.8011124249475435
LatentSpace_v40	Nodulus (X)	vermal X	3	0.9764150584341469
LatentSpace_v40	Simple lobule	VI	5	0.9498290817585716
LatentSpace_v40	Crus 1	crus I	10	0.9823075679042966
LatentSpace_v40	Crus 2	crus II	3	0.969135232839533
LatentSpace_v40	Paramedian lobule	VIIB	12	0.9469617576098132
LatentSpace_v40	Copula pyramidis	VIIIA	23	0.8717239770920838
LatentSpace_v40	Flocculus	X	12	0.8489250450181463
LatentSpace_v40	Paraflocculus	IX	8	0.9190971760389781
LatentSpace_v40	Cerebellar nuclei	cerebellar nuclei	2	0.9978228607764663
LatentSpace_v41	Cortical subplate-other	amygdala	1	1
LatentSpace_v41	Claustrum	claustrum	1	1
LatentSpace_v41	Piriform area	piriform cortex	1	1
LatentSpace_v41	Subiculum	subiculum	1	1
LatentSpace_v41	Field CA1	CA1 field	1	1
LatentSpace_v41	Field CA2	CA2 field	2	0.9782877062919979
LatentSpace_v41	Field CA3	CA3 field	2	0.99270630417075445
LatentSpace_v41	Dentate gyrus	dentate gyrus	5	0.9572726334362494
LatentSpace_v41	Anterior cingulate area	cingulate gyrus	3	0.9837413010672782
LatentSpace_v41	Primary auditory area	Heschl's gyrus	2	0.9955753502627837
LatentSpace_v41	Primary motor area	precentral gyrus	2	0.983873759611814
LatentSpace_v41	Primary somatosensory area	postcentral gyrus	6	0.978906169731382
LatentSpace_v41	Visual areas	cuneus	7	0.963923715018964
LatentSpace_v41	Pallidum	globus pallidus	18	0.5160166142500205
LatentSpace_v41	Striatum ventral region	nucleus accumbens	1	1
LatentSpace_v41	Caudoputamen	caudate nucleus	1	1
LatentSpace_v41	Hypothalamus	hypothalamus	1	1
LatentSpace_v41	Thalamus	thalamus	1	1
LatentSpace_v41	Inferior colliculus	inferior colliculus	1	1
LatentSpace_v41	Superior colliculus	superior colliculus	1	1
LatentSpace_v41	Pons	pons	1	1
LatentSpace_v41	Medulla	myelencephalon	2	0.9973210486258844
LatentSpace_v41	Lingula (I)	vermal I-II	4	0.9640141957990451
LatentSpace_v41	Declive (VI)	vermal VI	18	0.960882668102727
LatentSpace_v41	Folium-tuber vermis (VII)	vermal VIIAf	13	0.9606735293354696
LatentSpace_v41	Pyramus (VIII)	vermal VIIIA	12	0.9327549216869354
LatentSpace_v41	Uvula (IX)	vermal IX	10	0.7873131679312576
LatentSpace_v41	Nodulus (X)	vermal X	1	1
LatentSpace_v41	Simple lobule	VI	10	0.9141243598593364
LatentSpace_v41	Crus 1	crus I	16	0.9469822919427281
LatentSpace_v41	Crus 2	crus II	3	0.9683047891620916
LatentSpace_v41	Paramedian lobule	VIIB	4	0.9734064055005063
LatentSpace_v41	Copula pyramidis	VIIIA	21	0.9375745036069669
LatentSpace_v41	Flocculus	X	6	0.9546963499560598
LatentSpace_v41	Paraflocculus	IX	21	0.8227607420866103
LatentSpace_v41	Cerebellar nuclei	cerebellar nuclei	1	1
LatentSpace_v42	Cortical subplate-other	amygdala	1	1
LatentSpace_v42	Claustrum	claustrum	1	1
LatentSpace_v42	Piriform area	piriform cortex	1	1
LatentSpace_v42	Subiculum	subiculum	1	1
LatentSpace_v42	Field CA1	CA1 field	1	1
LatentSpace_v42	Field CA2	CA2 field	2	0.9539823835103164
LatentSpace_v42	Field CA3	CA3 field	2	0.9957712733432689
LatentSpace_v42	Dentate gyrus	dentate gyrus	6	0.8290417706613569
LatentSpace_v42	Anterior cingulate area	cingulate gyrus	6	0.968471650162324
LatentSpace_v42	Primary auditory area	Heschl's gyrus	4	0.9798567953745744
LatentSpace_v42	Primary motor area	precentral gyrus	4	0.9736069009937502
LatentSpace_v42	Primary somatosensory area	postcentral gyrus	8	0.9635518206865287
LatentSpace_v42	Visual areas	cuneus	12	0.947686249473412
LatentSpace_v42	Pallidum	globus pallidus	10	0.702712018023687
LatentSpace_v42	Striatum ventral region	nucleus accumbens	1	1
LatentSpace_v42	Caudoputamen	caudate nucleus	1	1
LatentSpace_v42	Hypothalamus	hypothalamus	1	1
LatentSpace_v42	Thalamus	thalamus	1	1
LatentSpace_v42	Inferior colliculus	inferior colliculus	1	1
LatentSpace_v42	Superior colliculus	superior colliculus	1	1
LatentSpace_v42	Pons	pons	1	1
LatentSpace_v42	Medulla	myelencephalon	1	1
LatentSpace_v42	Lingula (I)	vermal I-II	12	0.8604797095925106
LatentSpace_v42	Declive (VI)	vermal VI	20	0.9384286551523999
LatentSpace_v42	Folium-tuber vermis (VII)	vermal VIIAf	16	0.9731405414301837
LatentSpace_v42	Pyramus (VIII)	vermal VIIIA	21	0.8539407083522467
LatentSpace_v42	Uvula (IX)	vermal IX	20	0.7376132154358579
LatentSpace_v42	Nodulus (X)	vermal X	1	1
LatentSpace_v42	Simple lobule	VI	8	0.9206084417070785
LatentSpace_v42	Crus 1	crus I	11	0.9576055436337133
LatentSpace_v42	Crus 2	crus II	6	0.9643247248849908
LatentSpace_v42	Paramedian lobule	VIIB	14	0.8993723668227184
LatentSpace_v42	Copula pyramidis	VIIIA	22	0.8686827865917665
LatentSpace_v42	Flocculus	X	6	0.8740080788195017
LatentSpace_v42	Paraflocculus	IX	18	0.8723913713206101
LatentSpace_v42	Cerebellar nuclei	cerebellar nuclei	1	1
LatentSpace_v43	Cortical subplate-other	amygdala	1	1
LatentSpace_v43	Claustrum	claustrum	1	1
LatentSpace_v43	Piriform area	piriform cortex	2	0.9589785852374464
LatentSpace_v43	Subiculum	subiculum	1	1
LatentSpace_v43	Field CA1	CA1 field	1	1
LatentSpace_v43	Field CA2	CA2 field	4	0.9560999714568849
LatentSpace_v43	Field CA3	CA3 field	1	1
LatentSpace_v43	Dentate gyrus	dentate gyrus	4	0.9786045393253839
LatentSpace_v43	Anterior cingulate area	cingulate gyrus	1	1
LatentSpace_v43	Primary auditory area	Heschl's gyrus	5	0.9859305740510073
LatentSpace_v43	Primary motor area	precentral gyrus	6	0.9831988085010064
LatentSpace_v43	Primary somatosensory area	postcentral gyrus	6	0.9709267583927845
LatentSpace_v43	Visual areas	cuneus	21	0.9132026962451573
LatentSpace_v43	Pallidum	globus pallidus	11	0.7539945136132565
LatentSpace_v43	Striatum ventral region	nucleus accumbens	1	1
LatentSpace_v43	Caudoputamen	caudate nucleus	1	1
LatentSpace_v43	Hypothalamus	hypothalamus	1	1
LatentSpace_v43	Thalamus	thalamus	1	1
LatentSpace_v43	Inferior colliculus	inferior colliculus	1	1
LatentSpace_v43	Superior colliculus	superior colliculus	1	1
LatentSpace_v43	Pons	pons	1	1
LatentSpace_v43	Medulla	myelencephalon	3	0.992736788571876
LatentSpace_v43	Lingula (I)	vermal I-II	12	0.7570481587827624
LatentSpace_v43	Declive (VI)	vermal VI	20	0.9184360766236039
LatentSpace_v43	Folium-tuber vermis (VII)	vermal VIIAf	21	0.9412761424679811
LatentSpace_v43	Pyramus (VIII)	vermal VIIIA	19	0.9197919311786523
LatentSpace_v43	Uvula (IX)	vermal IX	16	0.7843064485306691
LatentSpace_v43	Nodulus (X)	vermal X	3	0.9809083993729272
LatentSpace_v43	Simple lobule	VI	11	0.8962696073864911
LatentSpace_v43	Crus 1	crus I	17	0.9265889447813755
LatentSpace_v43	Crus 2	crus II	5	0.9362241538745056
LatentSpace_v43	Paramedian lobule	VIIB	6	0.9468339048483726
LatentSpace_v43	Copula pyramidis	VIIIA	21	0.9214688786823504
LatentSpace_v43	Flocculus	X	2	0.9578301765681224
LatentSpace_v43	Paraflocculus	IX	4	0.9630769435478391
LatentSpace_v43	Cerebellar nuclei	cerebellar nuclei	2	0.9946553354876411
LatentSpace_v44	Cortical subplate-other	amygdala	1	1
LatentSpace_v44	Claustrum	claustrum	1	1
LatentSpace_v44	Piriform area	piriform cortex	4	0.9622328332048975
LatentSpace_v44	Subiculum	subiculum	1	1
LatentSpace_v44	Field CA1	CA1 field	1	1
LatentSpace_v44	Field CA2	CA2 field	2	0.9854560435248833
LatentSpace_v44	Field CA3	CA3 field	1	1
LatentSpace_v44	Dentate gyrus	dentate gyrus	4	0.9375312102622861
LatentSpace_v44	Anterior cingulate area	cingulate gyrus	3	0.9835881214981578
LatentSpace_v44	Primary auditory area	Heschl's gyrus	10	0.971665966502359
LatentSpace_v44	Primary motor area	precentral gyrus	2	0.9908399782156825
LatentSpace_v44	Primary somatosensory area	postcentral gyrus	6	0.9813711139357597
LatentSpace_v44	Visual areas	cuneus	12	0.9390284094159241
LatentSpace_v44	Pallidum	globus pallidus	11	0.6631654023200545
LatentSpace_v44	Striatum ventral region	nucleus accumbens	1	1
LatentSpace_v44	Caudoputamen	caudate nucleus	1	1
LatentSpace_v44	Hypothalamus	hypothalamus	1	1
LatentSpace_v44	Thalamus	thalamus	1	1
LatentSpace_v44	Inferior colliculus	inferior colliculus	2	0.8939898066686168
LatentSpace_v44	Superior colliculus	superior colliculus	2	0.9443390026958153
LatentSpace_v44	Pons	pons	1	1
LatentSpace_v44	Medulla	myelencephalon	1	1
LatentSpace_v44	Lingula (I)	vermal I-II	8	0.9011475700364746
LatentSpace_v44	Declive (VI)	vermal VI	18	0.9578625627458933
LatentSpace_v44	Folium-tuber vermis (VII)	vermal VIIAf	18	0.9620682836052903
LatentSpace_v44	Pyramus (VIII)	vermal VIIIA	14	0.9205498685882125
LatentSpace_v44	Uvula (IX)	vermal IX	10	0.823009089001168
LatentSpace_v44	Nodulus (X)	vermal X	1	1
LatentSpace_v44	Simple lobule	VI	6	0.9579168549620568
LatentSpace_v44	Crus 1	crus I	10	0.9680052269907156
LatentSpace_v44	Crus 2	crus II	4	0.978837890884227
LatentSpace_v44	Paramedian lobule	VIIB	6	0.9828972250910905
LatentSpace_v44	Copula pyramidis	VIIIA	21	0.8658816135427496
LatentSpace_v44	Flocculus	X	7	0.910653299396206
LatentSpace_v44	Paraflocculus	IX	20	0.8531251383080344
LatentSpace_v44	Cerebellar nuclei	cerebellar nuclei	1	1
LatentSpace_v45	Cortical subplate-other	amygdala	1	1
LatentSpace_v45	Claustrum	claustrum	9	0.9098030468700752
LatentSpace_v45	Piriform area	piriform cortex	8	0.878998480944048
LatentSpace_v45	Subiculum	subiculum	1	1
LatentSpace_v45	Field CA1	CA1 field	1	1
LatentSpace_v45	Field CA2	CA2 field	3	0.8527740800350243
LatentSpace_v45	Field CA3	CA3 field	2	0.9606741271122572
LatentSpace_v45	Dentate gyrus	dentate gyrus	3	0.9835110655758111
LatentSpace_v45	Anterior cingulate area	cingulate gyrus	1	1
LatentSpace_v45	Primary auditory area	Heschl's gyrus	7	0.9726525571211305
LatentSpace_v45	Primary motor area	precentral gyrus	6	0.9886971755895764
LatentSpace_v45	Primary somatosensory area	postcentral gyrus	9	0.9685411603404509
LatentSpace_v45	Visual areas	cuneus	5	0.9676082864498597
LatentSpace_v45	Pallidum	globus pallidus	10	0.7730799121034104
LatentSpace_v45	Striatum ventral region	nucleus accumbens	1	1
LatentSpace_v45	Caudoputamen	caudate nucleus	1	1
LatentSpace_v45	Hypothalamus	hypothalamus	1	1
LatentSpace_v45	Thalamus	thalamus	1	1
LatentSpace_v45	Inferior colliculus	inferior colliculus	1	1
LatentSpace_v45	Superior colliculus	superior colliculus	1	1
LatentSpace_v45	Pons	pons	1	1
LatentSpace_v45	Medulla	myelencephalon	3	0.996147077394554
LatentSpace_v45	Lingula (I)	vermal I-II	7	0.7982418941604459
LatentSpace_v45	Declive (VI)	vermal VI	10	0.9503539044172817
LatentSpace_v45	Folium-tuber vermis (VII)	vermal VIIAf	20	0.9347524747842079
LatentSpace_v45	Pyramus (VIII)	vermal VIIIA	10	0.9014501817842224
LatentSpace_v45	Uvula (IX)	vermal IX	16	0.7976344402506146
LatentSpace_v45	Nodulus (X)	vermal X	4	0.9138336302346131
LatentSpace_v45	Simple lobule	VI	9	0.9362398611109972
LatentSpace_v45	Crus 1	crus I	13	0.9738747296599426
LatentSpace_v45	Crus 2	crus II	7	0.9910281888613411
LatentSpace_v45	Paramedian lobule	VIIB	10	0.9850357049502165
LatentSpace_v45	Copula pyramidis	VIIIA	19	0.9041082603746298
LatentSpace_v45	Flocculus	X	8	0.9177248790767455
LatentSpace_v45	Paraflocculus	IX	12	0.8738083404304584
LatentSpace_v45	Cerebellar nuclei	cerebellar nuclei	2	0.9872574190884637
LatentSpace_v46	Cortical subplate-other	amygdala	2	0.9919805481791893
LatentSpace_v46	Claustrum	claustrum	1	1
LatentSpace_v46	Piriform area	piriform cortex	1	1
LatentSpace_v46	Subiculum	subiculum	1	1
LatentSpace_v46	Field CA1	CA1 field	1	1
LatentSpace_v46	Field CA2	CA2 field	3	0.8949183557115646
LatentSpace_v46	Field CA3	CA3 field	2	0.9960152609045114
LatentSpace_v46	Dentate gyrus	dentate gyrus	1	1
LatentSpace_v46	Anterior cingulate area	cingulate gyrus	3	0.9877505803243722
LatentSpace_v46	Primary auditory area	Heschl's gyrus	21	0.8777626804875202
LatentSpace_v46	Primary motor area	precentral gyrus	2	0.9739981574708755
LatentSpace_v46	Primary somatosensory area	postcentral gyrus	10	0.9607388149456503
LatentSpace_v46	Visual areas	cuneus	23	0.8802701352624205
LatentSpace_v46	Pallidum	globus pallidus	15	0.6574129304122772
LatentSpace_v46	Striatum ventral region	nucleus accumbens	1	1
LatentSpace_v46	Caudoputamen	caudate nucleus	1	1
LatentSpace_v46	Hypothalamus	hypothalamus	1	1
LatentSpace_v46	Thalamus	thalamus	1	1
LatentSpace_v46	Inferior colliculus	inferior colliculus	1	1
LatentSpace_v46	Superior colliculus	superior colliculus	1	1
LatentSpace_v46	Pons	pons	1	1
LatentSpace_v46	Medulla	myelencephalon	1	1
LatentSpace_v46	Lingula (I)	vermal I-II	4	0.9221263437707076
LatentSpace_v46	Declive (VI)	vermal VI	18	0.9611576606853665
LatentSpace_v46	Folium-tuber vermis (VII)	vermal VIIAf	17	0.9751573840336897
LatentSpace_v46	Pyramus (VIII)	vermal VIIIA	17	0.9233923081104949
LatentSpace_v46	Uvula (IX)	vermal IX	5	0.8616649959648189
LatentSpace_v46	Nodulus (X)	vermal X	1	1
LatentSpace_v46	Simple lobule	VI	9	0.9106982062061462
LatentSpace_v46	Crus 1	crus I	18	0.9496926645798403
LatentSpace_v46	Crus 2	crus II	7	0.9820730606245182
LatentSpace_v46	Paramedian lobule	VIIB	12	0.955737167916566
LatentSpace_v46	Copula pyramidis	VIIIA	21	0.8515333379232666
LatentSpace_v46	Flocculus	X	7	0.8761147042480191
LatentSpace_v46	Paraflocculus	IX	25	0.8329286556703591
LatentSpace_v46	Cerebellar nuclei	cerebellar nuclei	2	0.9715409548176378
LatentSpace_v47	Cortical subplate-other	amygdala	2	0.9790835796590169
LatentSpace_v47	Claustrum	claustrum	1	1
LatentSpace_v47	Piriform area	piriform cortex	2	0.9844525888027673
LatentSpace_v47	Subiculum	subiculum	1	1
LatentSpace_v47	Field CA1	CA1 field	1	1
LatentSpace_v47	Field CA2	CA2 field	3	0.9287810739692108
LatentSpace_v47	Field CA3	CA3 field	2	0.9852329076195216
LatentSpace_v47	Dentate gyrus	dentate gyrus	3	0.9261840494759538
LatentSpace_v47	Anterior cingulate area	cingulate gyrus	12	0.9417504151074977
LatentSpace_v47	Primary auditory area	Heschl's gyrus	14	0.9490502710109285
LatentSpace_v47	Primary motor area	precentral gyrus	8	0.9752686225402905
LatentSpace_v47	Primary somatosensory area	postcentral gyrus	8	0.9685670672097446
LatentSpace_v47	Visual areas	cuneus	23	0.9077854067875535
LatentSpace_v47	Pallidum	globus pallidus	15	0.7023686374141855
LatentSpace_v47	Striatum ventral region	nucleus accumbens	1	1
LatentSpace_v47	Caudoputamen	caudate nucleus	1	1
LatentSpace_v47	Hypothalamus	hypothalamus	1	1
LatentSpace_v47	Thalamus	thalamus	1	1
LatentSpace_v47	Inferior colliculus	inferior colliculus	1	1
LatentSpace_v47	Superior colliculus	superior colliculus	1	1
LatentSpace_v47	Pons	pons	1	1
LatentSpace_v47	Medulla	myelencephalon	3	0.9915750226181846
LatentSpace_v47	Lingula (I)	vermal I-II	8	0.8363018716342346
LatentSpace_v47	Declive (VI)	vermal VI	18	0.9634139873617388
LatentSpace_v47	Folium-tuber vermis (VII)	vermal VIIAf	18	0.894537977444329
LatentSpace_v47	Pyramus (VIII)	vermal VIIIA	28	0.7969275226624654
LatentSpace_v47	Uvula (IX)	vermal IX	22	0.7311318122519672
LatentSpace_v47	Nodulus (X)	vermal X	1	1
LatentSpace_v47	Simple lobule	VI	15	0.9511090513538027
LatentSpace_v47	Crus 1	crus I	12	0.938109816174296
LatentSpace_v47	Crus 2	crus II	6	0.94254694520203
LatentSpace_v47	Paramedian lobule	VIIB	12	0.9202077425495723
LatentSpace_v47	Copula pyramidis	VIIIA	25	0.8147160112698801
LatentSpace_v47	Flocculus	X	13	0.8236591504971251
LatentSpace_v47	Paraflocculus	IX	12	0.8935381275983598
LatentSpace_v47	Cerebellar nuclei	cerebellar nuclei	1	1
LatentSpace_v48	Cortical subplate-other	amygdala	1	1
LatentSpace_v48	Claustrum	claustrum	1	1
LatentSpace_v48	Piriform area	piriform cortex	1	1
LatentSpace_v48	Subiculum	subiculum	1	1
LatentSpace_v48	Field CA1	CA1 field	1	1
LatentSpace_v48	Field CA2	CA2 field	13	0.8595258645612279
LatentSpace_v48	Field CA3	CA3 field	1	1
LatentSpace_v48	Dentate gyrus	dentate gyrus	1	1
LatentSpace_v48	Anterior cingulate area	cingulate gyrus	2	0.9936970667967859
LatentSpace_v48	Primary auditory area	Heschl's gyrus	13	0.9408938707053996
LatentSpace_v48	Primary motor area	precentral gyrus	9	0.9789655482381768
LatentSpace_v48	Primary somatosensory area	postcentral gyrus	9	0.9646752141436956
LatentSpace_v48	Visual areas	cuneus	24	0.898428152126166
LatentSpace_v48	Pallidum	globus pallidus	21	0.5428625820141313
LatentSpace_v48	Striatum ventral region	nucleus accumbens	1	1
LatentSpace_v48	Caudoputamen	caudate nucleus	1	1
LatentSpace_v48	Hypothalamus	hypothalamus	1	1
LatentSpace_v48	Thalamus	thalamus	2	0.9833601105311595
LatentSpace_v48	Inferior colliculus	inferior colliculus	1	1
LatentSpace_v48	Superior colliculus	superior colliculus	1	1
LatentSpace_v48	Pons	pons	1	1
LatentSpace_v48	Medulla	myelencephalon	1	1
LatentSpace_v48	Lingula (I)	vermal I-II	8	0.9006630952161127
LatentSpace_v48	Declive (VI)	vermal VI	17	0.9513629872035371
LatentSpace_v48	Folium-tuber vermis (VII)	vermal VIIAf	11	0.9888791714026097
LatentSpace_v48	Pyramus (VIII)	vermal VIIIA	17	0.9794937315823575
LatentSpace_v48	Uvula (IX)	vermal IX	5	0.9604161675207044
LatentSpace_v48	Nodulus (X)	vermal X	1	1
LatentSpace_v48	Simple lobule	VI	7	0.9492610447761923
LatentSpace_v48	Crus 1	crus I	10	0.9504062548427459
LatentSpace_v48	Crus 2	crus II	3	0.963543933425417
LatentSpace_v48	Paramedian lobule	VIIB	5	0.9593516117330753
LatentSpace_v48	Copula pyramidis	VIIIA	6	0.9906904525936819
LatentSpace_v48	Flocculus	X	3	0.9822758346366814
LatentSpace_v48	Paraflocculus	IX	7	0.9689364925175553
LatentSpace_v48	Cerebellar nuclei	cerebellar nuclei	1	1
LatentSpace_v49	Cortical subplate-other	amygdala	2	0.9762574684503846
LatentSpace_v49	Claustrum	claustrum	1	1
LatentSpace_v49	Piriform area	piriform cortex	2	0.9009483282163554
LatentSpace_v49	Subiculum	subiculum	1	1
LatentSpace_v49	Field CA1	CA1 field	1	1
LatentSpace_v49	Field CA2	CA2 field	3	0.9197601725048223
LatentSpace_v49	Field CA3	CA3 field	2	0.97931875786321
LatentSpace_v49	Dentate gyrus	dentate gyrus	2	0.9788082629888439
LatentSpace_v49	Anterior cingulate area	cingulate gyrus	1	1
LatentSpace_v49	Primary auditory area	Heschl's gyrus	10	0.9803949200017698
LatentSpace_v49	Primary motor area	precentral gyrus	7	0.9889397999761201
LatentSpace_v49	Primary somatosensory area	postcentral gyrus	5	0.9908764416828438
LatentSpace_v49	Visual areas	cuneus	24	0.9180639327683923
LatentSpace_v49	Pallidum	globus pallidus	14	0.5881697151425561
LatentSpace_v49	Striatum ventral region	nucleus accumbens	1	1
LatentSpace_v49	Caudoputamen	caudate nucleus	1	1
LatentSpace_v49	Hypothalamus	hypothalamus	1	1
LatentSpace_v49	Thalamus	thalamus	1	1
LatentSpace_v49	Inferior colliculus	inferior colliculus	1	1
LatentSpace_v49	Superior colliculus	superior colliculus	1	1
LatentSpace_v49	Pons	pons	1	1
LatentSpace_v49	Medulla	myelencephalon	1	1
LatentSpace_v49	Lingula (I)	vermal I-II	6	0.8847920128400896
LatentSpace_v49	Declive (VI)	vermal VI	14	0.9711092545508232
LatentSpace_v49	Folium-tuber vermis (VII)	vermal VIIAf	15	0.9798578030895757
LatentSpace_v49	Pyramus (VIII)	vermal VIIIA	8	0.9629295735977481
LatentSpace_v49	Uvula (IX)	vermal IX	6	0.8301508090533204
LatentSpace_v49	Nodulus (X)	vermal X	1	1
LatentSpace_v49	Simple lobule	VI	7	0.9193290176354926
LatentSpace_v49	Crus 1	crus I	15	0.9583094543057183
LatentSpace_v49	Crus 2	crus II	3	0.9692808830121841
LatentSpace_v49	Paramedian lobule	VIIB	5	0.9723671977466988
LatentSpace_v49	Copula pyramidis	VIIIA	17	0.9526863240247497
LatentSpace_v49	Flocculus	X	3	0.9704360682688457
LatentSpace_v49	Paraflocculus	IX	14	0.9523730220999513
LatentSpace_v49	Cerebellar nuclei	cerebellar nuclei	2	0.9744822440884975
LatentSpace_v50	Cortical subplate-other	amygdala	1	1
LatentSpace_v50	Claustrum	claustrum	6	0.9465894580379501
LatentSpace_v50	Piriform area	piriform cortex	1	1
LatentSpace_v50	Subiculum	subiculum	1	1
LatentSpace_v50	Field CA1	CA1 field	1	1
LatentSpace_v50	Field CA2	CA2 field	3	0.9169454069070616
LatentSpace_v50	Field CA3	CA3 field	2	0.97923974635537
LatentSpace_v50	Dentate gyrus	dentate gyrus	1	1
LatentSpace_v50	Anterior cingulate area	cingulate gyrus	4	0.9773060627613392
LatentSpace_v50	Primary auditory area	Heschl's gyrus	8	0.9819591553037336
LatentSpace_v50	Primary motor area	precentral gyrus	2	0.9881125457871983
LatentSpace_v50	Primary somatosensory area	postcentral gyrus	4	0.9964328707955276
LatentSpace_v50	Visual areas	cuneus	12	0.9656329531804428
LatentSpace_v50	Pallidum	globus pallidus	13	0.6155750216976104
LatentSpace_v50	Striatum ventral region	nucleus accumbens	1	1
LatentSpace_v50	Caudoputamen	caudate nucleus	1	1
LatentSpace_v50	Hypothalamus	hypothalamus	1	1
LatentSpace_v50	Thalamus	thalamus	1	1
LatentSpace_v50	Inferior colliculus	inferior colliculus	1	1
LatentSpace_v50	Superior colliculus	superior colliculus	1	1
LatentSpace_v50	Pons	pons	1	1
LatentSpace_v50	Medulla	myelencephalon	1	1
LatentSpace_v50	Lingula (I)	vermal I-II	10	0.7877593928366321
LatentSpace_v50	Declive (VI)	vermal VI	21	0.9610016899752306
LatentSpace_v50	Folium-tuber vermis (VII)	vermal VIIAf	13	0.9697121920908033
LatentSpace_v50	Pyramus (VIII)	vermal VIIIA	16	0.94840571155526
LatentSpace_v50	Uvula (IX)	vermal IX	6	0.8450586484916311
LatentSpace_v50	Nodulus (X)	vermal X	1	1
LatentSpace_v50	Simple lobule	VI	16	0.939042101171293
LatentSpace_v50	Crus 1	crus I	16	0.968212139233412
LatentSpace_v50	Crus 2	crus II	3	0.9943217871459803
LatentSpace_v50	Paramedian lobule	VIIB	10	0.982400262043561
LatentSpace_v50	Copula pyramidis	VIIIA	21	0.9346116658883504
LatentSpace_v50	Flocculus	X	3	0.9527916441218369
LatentSpace_v50	Paraflocculus	IX	22	0.8866510246536013
LatentSpace_v50	Cerebellar nuclei	cerebellar nuclei	1	1
LatentSpace_v51	Cortical subplate-other	amygdala	1	1
LatentSpace_v51	Claustrum	claustrum	2	0.9916871827539082
LatentSpace_v51	Piriform area	piriform cortex	1	1
LatentSpace_v51	Subiculum	subiculum	1	1
LatentSpace_v51	Field CA1	CA1 field	1	1
LatentSpace_v51	Field CA2	CA2 field	2	0.9386416611161083
LatentSpace_v51	Field CA3	CA3 field	1	1
LatentSpace_v51	Dentate gyrus	dentate gyrus	5	0.8739500129926769
LatentSpace_v51	Anterior cingulate area	cingulate gyrus	3	0.9667180469542547
LatentSpace_v51	Primary auditory area	Heschl's gyrus	4	0.9844997242307589
LatentSpace_v51	Primary motor area	precentral gyrus	2	0.9849284870680275
LatentSpace_v51	Primary somatosensory area	postcentral gyrus	6	0.9818400755664677
LatentSpace_v51	Visual areas	cuneus	12	0.9557054080073191
LatentSpace_v51	Pallidum	globus pallidus	10	0.6956188524471273
LatentSpace_v51	Striatum ventral region	nucleus accumbens	1	1
LatentSpace_v51	Caudoputamen	caudate nucleus	1	1
LatentSpace_v51	Hypothalamus	hypothalamus	1	1
LatentSpace_v51	Thalamus	thalamus	1	1
LatentSpace_v51	Inferior colliculus	inferior colliculus	1	1
LatentSpace_v51	Superior colliculus	superior colliculus	1	1
LatentSpace_v51	Pons	pons	1	1
LatentSpace_v51	Medulla	myelencephalon	2	0.9904244897170333
LatentSpace_v51	Lingula (I)	vermal I-II	12	0.7086090086337237
LatentSpace_v51	Declive (VI)	vermal VI	21	0.9451406280349283
LatentSpace_v51	Folium-tuber vermis (VII)	vermal VIIAf	19	0.9473858002821383
LatentSpace_v51	Pyramus (VIII)	vermal VIIIA	13	0.898061784309238
LatentSpace_v51	Uvula (IX)	vermal IX	15	0.7552174846997417
LatentSpace_v51	Nodulus (X)	vermal X	9	0.872680459104098
LatentSpace_v51	Simple lobule	VI	10	0.9100294211750343
LatentSpace_v51	Crus 1	crus I	13	0.9657806429038016
LatentSpace_v51	Crus 2	crus II	2	0.9912330817213197
LatentSpace_v51	Paramedian lobule	VIIB	8	0.988604966423866
LatentSpace_v51	Copula pyramidis	VIIIA	22	0.8625161329534508
LatentSpace_v51	Flocculus	X	6	0.8895830787889409
LatentSpace_v51	Paraflocculus	IX	23	0.8489490202836485
LatentSpace_v51	Cerebellar nuclei	cerebellar nuclei	1	1
LatentSpace_v52	Cortical subplate-other	amygdala	1	1
LatentSpace_v52	Claustrum	claustrum	1	1
LatentSpace_v52	Piriform area	piriform cortex	1	1
LatentSpace_v52	Subiculum	subiculum	1	1
LatentSpace_v52	Field CA1	CA1 field	1	1
LatentSpace_v52	Field CA2	CA2 field	2	0.8582425551972238
LatentSpace_v52	Field CA3	CA3 field	2	0.9884836559736037
LatentSpace_v52	Dentate gyrus	dentate gyrus	2	0.9668685130084476
LatentSpace_v52	Anterior cingulate area	cingulate gyrus	3	0.9852333118101294
LatentSpace_v52	Primary auditory area	Heschl's gyrus	5	0.9728671993628012
LatentSpace_v52	Primary motor area	precentral gyrus	2	0.9827083530178052
LatentSpace_v52	Primary somatosensory area	postcentral gyrus	4	0.9914991441651108
LatentSpace_v52	Visual areas	cuneus	17	0.9078637386056978
LatentSpace_v52	Pallidum	globus pallidus	7	0.781948570769381
LatentSpace_v52	Striatum ventral region	nucleus accumbens	1	1
LatentSpace_v52	Caudoputamen	caudate nucleus	1	1
LatentSpace_v52	Hypothalamus	hypothalamus	1	1
LatentSpace_v52	Thalamus	thalamus	1	1
LatentSpace_v52	Inferior colliculus	inferior colliculus	3	0.9130674240717256
LatentSpace_v52	Superior colliculus	superior colliculus	1	1
LatentSpace_v52	Pons	pons	1	1
LatentSpace_v52	Medulla	myelencephalon	1	1
LatentSpace_v52	Lingula (I)	vermal I-II	4	0.9193917032115037
LatentSpace_v52	Declive (VI)	vermal VI	19	0.9821821790978527
LatentSpace_v52	Folium-tuber vermis (VII)	vermal VIIAf	17	0.9774347103133285
LatentSpace_v52	Pyramus (VIII)	vermal VIIIA	11	0.9499544656421653
LatentSpace_v52	Uvula (IX)	vermal IX	13	0.8837983415953916
LatentSpace_v52	Nodulus (X)	vermal X	2	0.9961946871938048
LatentSpace_v52	Simple lobule	VI	4	0.971890058899592
LatentSpace_v52	Crus 1	crus I	10	0.9837240984336614
LatentSpace_v52	Crus 2	crus II	4	0.9773828071756377
LatentSpace_v52	Paramedian lobule	VIIB	8	0.977123151114658
LatentSpace_v52	Copula pyramidis	VIIIA	17	0.9421866697107039
LatentSpace_v52	Flocculus	X	4	0.9755646682309789
LatentSpace_v52	Paraflocculus	IX	14	0.950780962651158
LatentSpace_v52	Cerebellar nuclei	cerebellar nuclei	1	1
LatentSpace_v53	Cortical subplate-other	amygdala	1	1
LatentSpace_v53	Claustrum	claustrum	1	1
LatentSpace_v53	Piriform area	piriform cortex	3	0.9990933773030218
LatentSpace_v53	Subiculum	subiculum	1	1
LatentSpace_v53	Field CA1	CA1 field	1	1
LatentSpace_v53	Field CA2	CA2 field	3	0.9507946398825378
LatentSpace_v53	Field CA3	CA3 field	2	0.9851728770735773
LatentSpace_v53	Dentate gyrus	dentate gyrus	6	0.88635605849197
LatentSpace_v53	Anterior cingulate area	cingulate gyrus	1	1
LatentSpace_v53	Primary auditory area	Heschl's gyrus	4	0.9807912199521668
LatentSpace_v53	Primary motor area	precentral gyrus	2	0.9852121012733317
LatentSpace_v53	Primary somatosensory area	postcentral gyrus	1	1
LatentSpace_v53	Visual areas	cuneus	13	0.9468395811898371
LatentSpace_v53	Pallidum	globus pallidus	13	0.6669801592191309
LatentSpace_v53	Striatum ventral region	nucleus accumbens	1	1
LatentSpace_v53	Caudoputamen	caudate nucleus	1	1
LatentSpace_v53	Hypothalamus	hypothalamus	1	1
LatentSpace_v53	Thalamus	thalamus	1	1
LatentSpace_v53	Inferior colliculus	inferior colliculus	2	0.9902170608518499
LatentSpace_v53	Superior colliculus	superior colliculus	1	1
LatentSpace_v53	Pons	pons	2	0.9966638557301292
LatentSpace_v53	Medulla	myelencephalon	3	0.9779475571442419
LatentSpace_v53	Lingula (I)	vermal I-II	5	0.8145673945755872
LatentSpace_v53	Declive (VI)	vermal VI	20	0.9331235274022035
LatentSpace_v53	Folium-tuber vermis (VII)	vermal VIIAf	15	0.9543715080219528
LatentSpace_v53	Pyramus (VIII)	vermal VIIIA	17	0.925276780309406
LatentSpace_v53	Uvula (IX)	vermal IX	6	0.7941733781246264
LatentSpace_v53	Nodulus (X)	vermal X	2	0.8935811047415975
LatentSpace_v53	Simple lobule	VI	7	0.9271579402191175
LatentSpace_v53	Crus 1	crus I	14	0.9636278573150049
LatentSpace_v53	Crus 2	crus II	7	0.9739479534555108
LatentSpace_v53	Paramedian lobule	VIIB	10	0.9694728146570469
LatentSpace_v53	Copula pyramidis	VIIIA	22	0.8944803174398007
LatentSpace_v53	Flocculus	X	7	0.943429564125
LatentSpace_v53	Paraflocculus	IX	12	0.9101656972293499
LatentSpace_v53	Cerebellar nuclei	cerebellar nuclei	1	1
LatentSpace_v54	Cortical subplate-other	amygdala	1	1
LatentSpace_v54	Claustrum	claustrum	1	1
LatentSpace_v54	Piriform area	piriform cortex	1	1
LatentSpace_v54	Subiculum	subiculum	1	1
LatentSpace_v54	Field CA1	CA1 field	1	1
LatentSpace_v54	Field CA2	CA2 field	2	0.9509264234027097
LatentSpace_v54	Field CA3	CA3 field	1	1
LatentSpace_v54	Dentate gyrus	dentate gyrus	6	0.8823056702703939
LatentSpace_v54	Anterior cingulate area	cingulate gyrus	3	0.9742572627056365
LatentSpace_v54	Primary auditory area	Heschl's gyrus	12	0.9592363354591414
LatentSpace_v54	Primary motor area	precentral gyrus	2	0.979711661562218
LatentSpace_v54	Primary somatosensory area	postcentral gyrus	6	0.9846068494679946
LatentSpace_v54	Visual areas	cuneus	23	0.9050344662093818
LatentSpace_v54	Pallidum	globus pallidus	15	0.6495516547341538
LatentSpace_v54	Striatum ventral region	nucleus accumbens	1	1
LatentSpace_v54	Caudoputamen	caudate nucleus	1	1
LatentSpace_v54	Hypothalamus	hypothalamus	1	1
LatentSpace_v54	Thalamus	thalamus	1	1
LatentSpace_v54	Inferior colliculus	inferior colliculus	1	1
LatentSpace_v54	Superior colliculus	superior colliculus	1	1
LatentSpace_v54	Pons	pons	1	1
LatentSpace_v54	Medulla	myelencephalon	1	1
LatentSpace_v54	Lingula (I)	vermal I-II	5	0.8539948637592697
LatentSpace_v54	Declive (VI)	vermal VI	18	0.9269709173695144
LatentSpace_v54	Folium-tuber vermis (VII)	vermal VIIAf	7	0.9723638711558468
LatentSpace_v54	Pyramus (VIII)	vermal VIIIA	20	0.8975410845170304
LatentSpace_v54	Uvula (IX)	vermal IX	19	0.7699242003740062
LatentSpace_v54	Nodulus (X)	vermal X	1	1
LatentSpace_v54	Simple lobule	VI	7	0.9341396858880663
LatentSpace_v54	Crus 1	crus I	12	0.9299174072832409
LatentSpace_v54	Crus 2	crus II	2	0.9464007951566074
LatentSpace_v54	Paramedian lobule	VIIB	5	0.9536920813432084
LatentSpace_v54	Copula pyramidis	VIIIA	19	0.8965820606243801
LatentSpace_v54	Flocculus	X	5	0.8905053586382212
LatentSpace_v54	Paraflocculus	IX	20	0.9000699356598185
LatentSpace_v54	Cerebellar nuclei	cerebellar nuclei	1	1
LatentSpace_v55	Cortical subplate-other	amygdala	1	1
LatentSpace_v55	Claustrum	claustrum	4	0.9745053705742963
LatentSpace_v55	Piriform area	piriform cortex	1	1
LatentSpace_v55	Subiculum	subiculum	1	1
LatentSpace_v55	Field CA1	CA1 field	1	1
LatentSpace_v55	Field CA2	CA2 field	3	0.9085382706204963
LatentSpace_v55	Field CA3	CA3 field	1	1
LatentSpace_v55	Dentate gyrus	dentate gyrus	6	0.8865696712106053
LatentSpace_v55	Anterior cingulate area	cingulate gyrus	5	0.9824241169223961
LatentSpace_v55	Primary auditory area	Heschl's gyrus	4	0.9699698185277809
LatentSpace_v55	Primary motor area	precentral gyrus	6	0.9826879469452094
LatentSpace_v55	Primary somatosensory area	postcentral gyrus	4	0.9953192925040435
LatentSpace_v55	Visual areas	cuneus	17	0.9355557784082037
LatentSpace_v55	Pallidum	globus pallidus	10	0.7071737551290547
LatentSpace_v55	Striatum ventral region	nucleus accumbens	1	1
LatentSpace_v55	Caudoputamen	caudate nucleus	1	1
LatentSpace_v55	Hypothalamus	hypothalamus	1	1
LatentSpace_v55	Thalamus	thalamus	1	1
LatentSpace_v55	Inferior colliculus	inferior colliculus	2	0.9781626523159649
[truncated: 16,037 more rows]
