# Supplementary material for: Whole-brain comparison of rodent and human brains using spatial transcriptomics
Source: eLife. 2022 Nov 7;11:e79418. doi: 10.7554/eLife.79418 (PMC9708081; doi:10.7554/eLife.79418)
Supplement: Figure 4—source data 2. [file elife-79418-fig4-data2.csv]

MouseRegion	theta	theta_error	theta_lower	theta_upper	p	p_lower	p_upper
Cortical subplate-other	0	0	0	0	1	1	1
Claustrum	0	0	0	0	1	1	1
Piriform area	0	0	0	0	1	1	1
Subiculum	0	0	0	0	1	1	1
Field CA1	4.254599024987201	0.38063820963650097	3.4933226057141997	5.015875444260203	0.9859999999999975	0.9704971788783379	0.993411867629265
Field CA2	0.16839681716509988	0.08975971987110609	-0.011122622577112301	0.3479162569073121	0.5419999999601924	0.49721937302224306	0.5861121856105024
Field CA3	2.8632585208836634	0.19786133454868815	2.467535851786287	3.2589811899810397	0.9459999999180643	0.9218343932970554	0.9629945014170256
Dentate gyrus	-1.6731849808596244	0.12260992258439801	-1.9184048260284206	-1.4279651356908283	0.15800000004732564	0.12803955455274457	0.1934159376772678
Anterior cingulate area	1.5998684595656725	0.11961562780292363	1.3606372039598251	1.8390997151715198	0.8319999997410961	0.7958632405377866	0.8628421975304952
Primary auditory area	1.6142456135794767	0.12019122682855263	1.3738631599223714	1.854628067236582	0.833999999941476	0.7980035881788097	0.8646695759428755
Primary motor area	0	0	0	0	1	1	1
Primary somatosensory area	0	0	0	0	1	1	1
Visual areas	5.517452896418571	0.7085218632030412	4.1004091700124885	6.934496622824653	0.9959999999998161	0.9837040610782086	0.9990273339603736
Pallidum	1.8152899666380389	0.12888478074459753	1.5575204051488438	2.073059528127234	0.8599999999999747	0.8259972592873547	0.8882570004271619
Striatum ventral region	0	0	0	0	1	1	1
Caudoputamen	4.119037174812433	0.35641619275028485	3.4062047893118628	4.831869560313002	0.9839999999999994	0.9678978885458323	0.9920914399766441
Hypothalamus	4.254599024987105	0.38063820963651396	3.4933226057140767	5.015875444260132	0.9859999999999962	0.9704971788783344	0.9934118676292646
Thalamus	2.8247744745759564	0.1945031449883043	2.4357681845993477	3.213780764552565	0.9439999999558906	0.9195144567215378	0.9613495910186755
Inferior colliculus	0.8188868585535121	0.09704526874635835	0.6247963210607954	1.0129773960462287	0.6939999999998064	0.6513086094427026	0.7336024260289868
Superior colliculus	2.242481168924348	0.15180817502495222	1.9388648188744435	2.5460975189742525	0.9040000000000007	0.8742273789434084	0.927310904634483
Pons	3.705408755600978	0.29219852043759126	3.1210117147257956	4.289805796476161	0.9759999999891273	0.9577511849977142	0.9864777700443031
Medulla	1.6731849808596242	0.12260992258439801	1.4279651356908283	1.91840482602842	0.8419999999526744	0.8065840623227322	0.8719604454472554
Lingula (I)	-4.254599024987211	0.38063820963650336	-5.015875444260218	-3.4933226057142046	0.014000000000002288	0.006588132370734887	0.029502821121661967
Declive (VI)	-3.032022253368469	0.21346117495556383	-3.4589446032795967	-2.605099903457341	0.04600000094748728	0.030503228821163783	0.06881091957532062
Folium-tuber vermis (VII)	2.4154781433560957	0.1629996360325053	2.0894788712910852	2.741477415421106	0.9179999999999894	0.8898763672655566	0.9394302178207389
Pyramus (VIII)	-1.7035667497949405	0.12389320381147358	-1.9513531574178877	-1.4557803421719933	0.1540000009637959	0.12440588509178536	0.1891135594316361
Uvula (IX)	2.82477447457596	0.19450314498830457	2.435768184599351	3.213780764552569	0.9439999999558907	0.919514456721538	0.9613495910186756
Nodulus (X)	2.649821696171961	0.18012251953376066	2.28957665710444	3.0100667352394823	0.9339999999981226	0.9080100952916058	0.9530268419271828
Simple lobule	4.410776047954846	0.41071940483846214	3.5893372382779214	5.23221485763177	0.9879999999999405	0.9731255539652635	0.9946867008222348
Crus 1	2.497978731354372	0.16876093941401338	2.1604568525263455	2.8355006101823985	0.9239999999999311	0.8966418951169683	0.9445643333945305
Crus 2	0	0	0	0	1	1	1
Paramedian lobule	2.363483275200607	0.15951173107852795	2.0444598130435514	2.682506737357663	0.9139999999999973	0.8853866155416718	0.9359864809873145
Copula pyramidis	3.7944672147997323	0.30487458489201974	3.1847180450156927	4.404216384583772	0.9779999999596194	0.9602551228101779	0.9879219791570297
Flocculus	1.7987770418866007	0.12812300257155296	1.5425310367434948	2.0550230470297066	0.8579999999999878	0.8238323622977258	0.8864541865580909
Paraflocculus	3.1780538303478933	0.22821771638696955	2.721618397573954	3.6344892631218326	0.959999999999998	0.9382903080511534	0.9742814890790706
Cerebellar nuclei	2.0907410949968233	0.1429261566249627	1.804888781746898	2.3765934082467486	0.8899999998103729	0.8587430019344415	0.9150249313058283
