# Supplementary material for: Whole-brain comparison of rodent and human brains using spatial transcriptomics
Source: eLife. 2022 Nov 7;11:e79418. doi: 10.7554/eLife.79418 (PMC9708081; doi:10.7554/eLife.79418)
Supplement: Figure 5—source data 1. [file elife-79418-fig5-data1.csv]

Data	MouseRegion	HumanRegion	MaxCorrelation	CortexType
LatentSpace_v1	Anterior cingulate area	middle frontal gyrus	0.90253931995227	Supramodal
LatentSpace_v1	Infralimbic area	dentate gyrus	0.8369031714118408	Supramodal
LatentSpace_v1	Retrosplenial area	superior parietal lobule	0.7865254750182883	Supramodal
LatentSpace_v1	Prelimbic area	cingulate gyrus	0.8865303712350776	Supramodal
LatentSpace_v1	Primary auditory area	planum temporale	0.8926828739970497	Sensorimotor
LatentSpace_v1	Dorsal auditory area	transverse gyri	0.9280262527746524	Sensorimotor
LatentSpace_v1	Ventral auditory area	frontal pole	0.8455919443891661	Sensorimotor
LatentSpace_v1	Agranular insular area	claustrum	0.8716835417522463	Supramodal
LatentSpace_v1	Ectorhinal area	claustrum	0.9167106950558241	Supramodal
LatentSpace_v1	Primary motor area	paracentral lobule, anterior part	0.9679501140254249	Sensorimotor
LatentSpace_v1	Secondary motor area	inferior parietal lobule	0.938791251844527	Sensorimotor
LatentSpace_v1	Frontal pole, cerebral cortex	frontal pole	0.8224296021291548	Supramodal
LatentSpace_v1	Orbital area	gyrus rectus	0.8925052498363596	Supramodal
LatentSpace_v1	Posterior parietal association areas	planum temporale	0.8703236911769778	Supramodal
LatentSpace_v1	Perirhinal area	parahippocampal gyrus	0.7865143846760093	Supramodal
LatentSpace_v1	Primary somatosensory area	transverse gyri	0.959564367851995	Sensorimotor
LatentSpace_v1	Supplemental somatosensory area	Heschl's gyrus	0.8407680597512289	Sensorimotor
LatentSpace_v1	Temporal association areas	frontal pole	0.8391653872126815	Supramodal
LatentSpace_v1	Visual areas	planum temporale	0.8854354668908191	Sensorimotor
LatentSpace_v2	Anterior cingulate area	frontal pole	0.8957182276640329	Supramodal
LatentSpace_v2	Infralimbic area	dentate gyrus	0.777636798290216	Supramodal
LatentSpace_v2	Retrosplenial area	planum temporale	0.7360112786825567	Supramodal
LatentSpace_v2	Prelimbic area	gyrus rectus	0.8635646025257795	Supramodal
LatentSpace_v2	Primary auditory area	paracentral lobule, posterior part	0.8980783068820036	Sensorimotor
LatentSpace_v2	Dorsal auditory area	planum temporale	0.9337207668882035	Sensorimotor
LatentSpace_v2	Ventral auditory area	paracentral lobule, posterior part	0.8341700100460978	Sensorimotor
LatentSpace_v2	Agranular insular area	claustrum	0.8799640994018438	Supramodal
LatentSpace_v2	Ectorhinal area	claustrum	0.9068989853550713	Supramodal
LatentSpace_v2	Primary motor area	occipito-temporal gyrus	0.955843235435563	Sensorimotor
LatentSpace_v2	Secondary motor area	frontal pole	0.9345713409703247	Sensorimotor
LatentSpace_v2	Frontal pole, cerebral cortex	posterior orbital gyrus	0.8542323305029585	Supramodal
LatentSpace_v2	Orbital area	gyrus rectus	0.9066827552743054	Supramodal
LatentSpace_v2	Posterior parietal association areas	planum temporale	0.8745944519246104	Supramodal
LatentSpace_v2	Perirhinal area	parahippocampal gyrus	0.8292668117876809	Supramodal
LatentSpace_v2	Primary somatosensory area	occipital pole	0.9647011587141554	Sensorimotor
LatentSpace_v2	Supplemental somatosensory area	inferior frontal gyrus	0.8421433978387374	Sensorimotor
LatentSpace_v2	Temporal association areas	inferior temporal gyrus	0.8542025579122055	Supramodal
LatentSpace_v2	Visual areas	planum temporale	0.9175831305505615	Sensorimotor
LatentSpace_v3	Anterior cingulate area	middle frontal gyrus	0.8757695529895423	Supramodal
LatentSpace_v3	Infralimbic area	CA3 field	0.8344611640358254	Supramodal
LatentSpace_v3	Retrosplenial area	paracentral lobule, posterior part	0.7303457615293019	Supramodal
LatentSpace_v3	Prelimbic area	superior rostral gyrus	0.8493114631280931	Supramodal
LatentSpace_v3	Primary auditory area	lateral orbital gyrus	0.8623426065545277	Sensorimotor
LatentSpace_v3	Dorsal auditory area	Heschl's gyrus	0.891197380727508	Sensorimotor
LatentSpace_v3	Ventral auditory area	lateral orbital gyrus	0.8081546223436221	Sensorimotor
LatentSpace_v3	Agranular insular area	temporal pole	0.8580810753886	Supramodal
LatentSpace_v3	Ectorhinal area	claustrum	0.8814216323612023	Supramodal
LatentSpace_v3	Primary motor area	paracentral lobule, anterior part	0.9705395651984566	Sensorimotor
LatentSpace_v3	Secondary motor area	paracentral lobule, anterior part	0.9112623431867702	Sensorimotor
LatentSpace_v3	Frontal pole, cerebral cortex	frontal operculum	0.7899822690594281	Supramodal
LatentSpace_v3	Orbital area	parolfactory gyri	0.8964242996364024	Supramodal
LatentSpace_v3	Posterior parietal association areas	planum temporale	0.8878069238745218	Supramodal
LatentSpace_v3	Perirhinal area	parahippocampal gyrus	0.8269634065977746	Supramodal
LatentSpace_v3	Primary somatosensory area	transverse gyri	0.946168465338792	Sensorimotor
LatentSpace_v3	Supplemental somatosensory area	posterior orbital gyrus	0.7834947761100352	Sensorimotor
LatentSpace_v3	Temporal association areas	insula	0.8354517714235824	Supramodal
LatentSpace_v3	Visual areas	planum temporale	0.9086053216136121	Sensorimotor
LatentSpace_v4	Anterior cingulate area	cingulate gyrus	0.8743435865885802	Supramodal
LatentSpace_v4	Infralimbic area	subiculum	0.8614031367541375	Supramodal
LatentSpace_v4	Retrosplenial area	planum temporale	0.6782331885560883	Supramodal
LatentSpace_v4	Prelimbic area	parolfactory gyri	0.8753881700177741	Supramodal
LatentSpace_v4	Primary auditory area	lateral orbital gyrus	0.8919228745426704	Sensorimotor
LatentSpace_v4	Dorsal auditory area	paracentral lobule, posterior part	0.9287273939964705	Sensorimotor
LatentSpace_v4	Ventral auditory area	lateral orbital gyrus	0.8411723294814004	Sensorimotor
LatentSpace_v4	Agranular insular area	claustrum	0.8544208779017874	Supramodal
LatentSpace_v4	Ectorhinal area	claustrum	0.8600636713728579	Supramodal
LatentSpace_v4	Primary motor area	middle frontal gyrus	0.9550660676311878	Sensorimotor
LatentSpace_v4	Secondary motor area	superior frontal gyrus	0.9343756178962707	Sensorimotor
LatentSpace_v4	Frontal pole, cerebral cortex	gyrus rectus	0.7906863753406209	Supramodal
LatentSpace_v4	Orbital area	temporal pole	0.887248199367019	Supramodal
LatentSpace_v4	Posterior parietal association areas	planum temporale	0.8895038198228923	Supramodal
LatentSpace_v4	Perirhinal area	temporal pole	0.7257841422249003	Supramodal
LatentSpace_v4	Primary somatosensory area	transverse gyri	0.9705279795216166	Sensorimotor
LatentSpace_v4	Supplemental somatosensory area	Heschl's gyrus	0.8530129553823335	Sensorimotor
LatentSpace_v4	Temporal association areas	insula	0.8218686605179926	Supramodal
LatentSpace_v4	Visual areas	planum temporale	0.8911645422535159	Sensorimotor
LatentSpace_v5	Anterior cingulate area	superior frontal gyrus	0.8908901878625587	Supramodal
LatentSpace_v5	Infralimbic area	subiculum	0.8273982260200553	Supramodal
LatentSpace_v5	Retrosplenial area	planum temporale	0.7130458595162011	Supramodal
LatentSpace_v5	Prelimbic area	gyrus rectus	0.8907757246628626	Supramodal
LatentSpace_v5	Primary auditory area	planum temporale	0.877247979255177	Sensorimotor
LatentSpace_v5	Dorsal auditory area	planum temporale	0.9250035991596729	Sensorimotor
LatentSpace_v5	Ventral auditory area	lateral orbital gyrus	0.8340606056477552	Sensorimotor
LatentSpace_v5	Agranular insular area	claustrum	0.9476833238468529	Supramodal
LatentSpace_v5	Ectorhinal area	claustrum	0.9210717146604777	Supramodal
LatentSpace_v5	Primary motor area	paracentral lobule, anterior part	0.9521161478709573	Sensorimotor
LatentSpace_v5	Secondary motor area	superior frontal gyrus	0.9164193943205696	Sensorimotor
LatentSpace_v5	Frontal pole, cerebral cortex	claustrum	0.8568992382607038	Supramodal
LatentSpace_v5	Orbital area	parolfactory gyri	0.9207339566865882	Supramodal
LatentSpace_v5	Posterior parietal association areas	frontal pole	0.8591668657614365	Supramodal
LatentSpace_v5	Perirhinal area	parahippocampal gyrus	0.8717233704257255	Supramodal
LatentSpace_v5	Primary somatosensory area	postcentral gyrus	0.9457688232829862	Sensorimotor
LatentSpace_v5	Supplemental somatosensory area	inferior parietal lobule	0.7952594823071836	Sensorimotor
LatentSpace_v5	Temporal association areas	inferior rostral gyrus	0.8606643013158427	Supramodal
LatentSpace_v5	Visual areas	planum temporale	0.8953923861866607	Sensorimotor
LatentSpace_v6	Anterior cingulate area	middle frontal gyrus	0.8742646605730683	Supramodal
LatentSpace_v6	Infralimbic area	subiculum	0.8754391480939478	Supramodal
LatentSpace_v6	Retrosplenial area	planum temporale	0.7431928660894159	Supramodal
LatentSpace_v6	Prelimbic area	gyrus rectus	0.8915744460886732	Supramodal
LatentSpace_v6	Primary auditory area	frontal pole	0.8440694819007892	Sensorimotor
LatentSpace_v6	Dorsal auditory area	occipito-temporal gyrus	0.8522171298570645	Sensorimotor
LatentSpace_v6	Ventral auditory area	frontal pole	0.7998838835636463	Sensorimotor
LatentSpace_v6	Agranular insular area	claustrum	0.8490705224423765	Supramodal
LatentSpace_v6	Ectorhinal area	claustrum	0.9158945001835217	Supramodal
LatentSpace_v6	Primary motor area	paracentral lobule, anterior part	0.9513142433996383	Sensorimotor
LatentSpace_v6	Secondary motor area	middle frontal gyrus	0.9059173991361145	Sensorimotor
LatentSpace_v6	Frontal pole, cerebral cortex	cingulate gyrus	0.7881879214142999	Supramodal
LatentSpace_v6	Orbital area	parolfactory gyri	0.9029791872983134	Supramodal
LatentSpace_v6	Posterior parietal association areas	planum temporale	0.8830760529088754	Supramodal
LatentSpace_v6	Perirhinal area	parahippocampal gyrus	0.842519839920407	Supramodal
LatentSpace_v6	Primary somatosensory area	occipital pole	0.9530478808553713	Sensorimotor
LatentSpace_v6	Supplemental somatosensory area	inferior frontal gyrus	0.7748453556583987	Sensorimotor
LatentSpace_v6	Temporal association areas	inferior rostral gyrus	0.8252105564915767	Supramodal
LatentSpace_v6	Visual areas	planum temporale	0.8689269047209632	Sensorimotor
LatentSpace_v7	Anterior cingulate area	superior frontal gyrus	0.931916951747032	Supramodal
LatentSpace_v7	Infralimbic area	dentate gyrus	0.8446008105911705	Supramodal
LatentSpace_v7	Retrosplenial area	superior parietal lobule	0.79548179110613	Supramodal
LatentSpace_v7	Prelimbic area	cingulate gyrus	0.8820525413153851	Supramodal
LatentSpace_v7	Primary auditory area	transverse gyri	0.8313964420257063	Sensorimotor
LatentSpace_v7	Dorsal auditory area	transverse gyri	0.8882182841934666	Sensorimotor
LatentSpace_v7	Ventral auditory area	superior temporal gyrus	0.7457572438437597	Sensorimotor
LatentSpace_v7	Agranular insular area	claustrum	0.8946000749188341	Supramodal
LatentSpace_v7	Ectorhinal area	claustrum	0.9196489415691192	Supramodal
LatentSpace_v7	Primary motor area	paracentral lobule, anterior part	0.9500423217417195	Sensorimotor
LatentSpace_v7	Secondary motor area	middle frontal gyrus	0.9395555284623128	Sensorimotor
LatentSpace_v7	Frontal pole, cerebral cortex	posterior orbital gyrus	0.7772689046120513	Supramodal
LatentSpace_v7	Orbital area	claustrum	0.9222416381622149	Supramodal
LatentSpace_v7	Posterior parietal association areas	planum temporale	0.8980956952626948	Supramodal
LatentSpace_v7	Perirhinal area	claustrum	0.8416098209160171	Supramodal
LatentSpace_v7	Primary somatosensory area	occipital pole	0.9500963613464444	Sensorimotor
LatentSpace_v7	Supplemental somatosensory area	transverse gyri	0.7802832984009321	Sensorimotor
LatentSpace_v7	Temporal association areas	insula	0.8156482997080279	Supramodal
LatentSpace_v7	Visual areas	superior parietal lobule	0.891235921000957	Sensorimotor
LatentSpace_v8	Anterior cingulate area	superior frontal gyrus	0.9238282245910848	Supramodal
LatentSpace_v8	Infralimbic area	subiculum	0.8773645400697259	Supramodal
LatentSpace_v8	Retrosplenial area	paracentral lobule, posterior part	0.7795794655324431	Supramodal
LatentSpace_v8	Prelimbic area	cingulate gyrus	0.8800173346170521	Supramodal
LatentSpace_v8	Primary auditory area	frontal pole	0.9094058279122031	Sensorimotor
LatentSpace_v8	Dorsal auditory area	planum temporale	0.9181399337839419	Sensorimotor
LatentSpace_v8	Ventral auditory area	frontal pole	0.867510377792035	Sensorimotor
LatentSpace_v8	Agranular insular area	claustrum	0.8828951754248141	Supramodal
LatentSpace_v8	Ectorhinal area	claustrum	0.9025072593802121	Supramodal
LatentSpace_v8	Primary motor area	paracentral lobule, anterior part	0.9574302087915548	Sensorimotor
LatentSpace_v8	Secondary motor area	superior frontal gyrus	0.9479744571069894	Sensorimotor
LatentSpace_v8	Frontal pole, cerebral cortex	posterior orbital gyrus	0.8345317038023566	Supramodal
LatentSpace_v8	Orbital area	temporal pole	0.8648518628497436	Supramodal
LatentSpace_v8	Posterior parietal association areas	planum temporale	0.8894343531476817	Supramodal
LatentSpace_v8	Perirhinal area	parahippocampal gyrus	0.8230213497076887	Supramodal
LatentSpace_v8	Primary somatosensory area	occipital pole	0.96320917085459	Sensorimotor
LatentSpace_v8	Supplemental somatosensory area	occipito-temporal gyrus	0.8477295888143693	Sensorimotor
LatentSpace_v8	Temporal association areas	insula	0.869784770953525	Supramodal
LatentSpace_v8	Visual areas	precuneus	0.8762204782249414	Sensorimotor
LatentSpace_v9	Anterior cingulate area	superior frontal gyrus	0.9257991855250682	Supramodal
LatentSpace_v9	Infralimbic area	subiculum	0.8944585272202453	Supramodal
LatentSpace_v9	Retrosplenial area	superior parietal lobule	0.8163979664180337	Supramodal
LatentSpace_v9	Prelimbic area	gyrus rectus	0.9011234155154539	Supramodal
LatentSpace_v9	Primary auditory area	frontal pole	0.8918168807142334	Sensorimotor
LatentSpace_v9	Dorsal auditory area	transverse gyri	0.9169240049036154	Sensorimotor
LatentSpace_v9	Ventral auditory area	lateral orbital gyrus	0.8450585951308658	Sensorimotor
LatentSpace_v9	Agranular insular area	claustrum	0.8899973290604593	Supramodal
LatentSpace_v9	Ectorhinal area	temporal pole	0.9113167926300403	Supramodal
LatentSpace_v9	Primary motor area	paracentral lobule, anterior part	0.962839296804597	Sensorimotor
LatentSpace_v9	Secondary motor area	paracentral lobule, anterior part	0.919292779625138	Sensorimotor
LatentSpace_v9	Frontal pole, cerebral cortex	claustrum	0.8210802163718411	Supramodal
LatentSpace_v9	Orbital area	parolfactory gyri	0.9087528207865739	Supramodal
LatentSpace_v9	Posterior parietal association areas	planum temporale	0.898240854031203	Supramodal
LatentSpace_v9	Perirhinal area	parahippocampal gyrus	0.8519509000349205	Supramodal
LatentSpace_v9	Primary somatosensory area	transverse gyri	0.9709161523476452	Sensorimotor
LatentSpace_v9	Supplemental somatosensory area	lateral orbital gyrus	0.8827850230025232	Sensorimotor
LatentSpace_v9	Temporal association areas	insula	0.8472152156816393	Supramodal
LatentSpace_v9	Visual areas	planum temporale	0.8894659313913806	Sensorimotor
LatentSpace_v10	Anterior cingulate area	superior frontal gyrus	0.9414196155756794	Supramodal
LatentSpace_v10	Infralimbic area	CA3 field	0.8150363399320555	Supramodal
LatentSpace_v10	Retrosplenial area	precentral gyrus	0.7692180126503022	Supramodal
LatentSpace_v10	Prelimbic area	claustrum	0.85931351768432	Supramodal
LatentSpace_v10	Primary auditory area	planum temporale	0.918762546876812	Sensorimotor
LatentSpace_v10	Dorsal auditory area	planum temporale	0.9423259165191185	Sensorimotor
LatentSpace_v10	Ventral auditory area	lateral orbital gyrus	0.8881592749253643	Sensorimotor
LatentSpace_v10	Agranular insular area	claustrum	0.8469271134026574	Supramodal
LatentSpace_v10	Ectorhinal area	fusiform gyrus	0.9331296573044243	Supramodal
LatentSpace_v10	Primary motor area	paracentral lobule, anterior part	0.9546896455311787	Sensorimotor
LatentSpace_v10	Secondary motor area	middle frontal gyrus	0.918500484136897	Sensorimotor
LatentSpace_v10	Frontal pole, cerebral cortex	claustrum	0.7869616447357036	Supramodal
LatentSpace_v10	Orbital area	parolfactory gyri	0.899486285519746	Supramodal
LatentSpace_v10	Posterior parietal association areas	planum temporale	0.8806723509888945	Supramodal
LatentSpace_v10	Perirhinal area	parahippocampal gyrus	0.8782161520448057	Supramodal
LatentSpace_v10	Primary somatosensory area	transverse gyri	0.9592326223311268	Sensorimotor
LatentSpace_v10	Supplemental somatosensory area	occipito-temporal gyrus	0.8648831133983266	Sensorimotor
LatentSpace_v10	Temporal association areas	inferior temporal gyrus	0.8967820679768892	Supramodal
LatentSpace_v10	Visual areas	planum temporale	0.9062643385706171	Sensorimotor
LatentSpace_v11	Anterior cingulate area	superior frontal gyrus	0.9009979546744811	Supramodal
LatentSpace_v11	Infralimbic area	subiculum	0.8479679366518339	Supramodal
LatentSpace_v11	Retrosplenial area	superior parietal lobule	0.7543528869849978	Supramodal
LatentSpace_v11	Prelimbic area	gyrus rectus	0.8788463733551577	Supramodal
LatentSpace_v11	Primary auditory area	planum temporale	0.8809108273903882	Sensorimotor
LatentSpace_v11	Dorsal auditory area	planum temporale	0.9290272176250252	Sensorimotor
LatentSpace_v11	Ventral auditory area	frontal pole	0.8408376504750041	Sensorimotor
LatentSpace_v11	Agranular insular area	claustrum	0.9093837384546515	Supramodal
LatentSpace_v11	Ectorhinal area	claustrum	0.9012401005715951	Supramodal
LatentSpace_v11	Primary motor area	paracentral lobule, anterior part	0.9483563704580261	Sensorimotor
LatentSpace_v11	Secondary motor area	superior frontal gyrus	0.9142411677061678	Sensorimotor
LatentSpace_v11	Frontal pole, cerebral cortex	posterior orbital gyrus	0.8282246575089669	Supramodal
LatentSpace_v11	Orbital area	claustrum	0.8931731314400285	Supramodal
LatentSpace_v11	Posterior parietal association areas	planum temporale	0.8806751732923835	Supramodal
LatentSpace_v11	Perirhinal area	parahippocampal gyrus	0.80217772231695	Supramodal
LatentSpace_v11	Primary somatosensory area	occipital pole	0.9770633509958376	Sensorimotor
LatentSpace_v11	Supplemental somatosensory area	inferior frontal gyrus	0.8719224171475	Sensorimotor
LatentSpace_v11	Temporal association areas	inferior temporal gyrus	0.8249878317051785	Supramodal
LatentSpace_v11	Visual areas	planum temporale	0.9100831669812253	Sensorimotor
LatentSpace_v12	Anterior cingulate area	superior frontal gyrus	0.8938403278246113	Supramodal
LatentSpace_v12	Infralimbic area	subiculum	0.860936896487698	Supramodal
LatentSpace_v12	Retrosplenial area	precentral gyrus	0.7824281685403067	Supramodal
LatentSpace_v12	Prelimbic area	gyrus rectus	0.8465636730465278	Supramodal
LatentSpace_v12	Primary auditory area	transverse gyri	0.8288499591348096	Sensorimotor
LatentSpace_v12	Dorsal auditory area	transverse gyri	0.8948867529351294	Sensorimotor
LatentSpace_v12	Ventral auditory area	lateral orbital gyrus	0.7704276711509027	Sensorimotor
LatentSpace_v12	Agranular insular area	claustrum	0.9003293170759701	Supramodal
LatentSpace_v12	Ectorhinal area	insula	0.9047319768481187	Supramodal
LatentSpace_v12	Primary motor area	paracentral lobule, anterior part	0.9373715785173673	Sensorimotor
LatentSpace_v12	Secondary motor area	paracentral lobule, anterior part	0.8876514088922006	Sensorimotor
LatentSpace_v12	Frontal pole, cerebral cortex	claustrum	0.743054319521623	Supramodal
LatentSpace_v12	Orbital area	claustrum	0.9181064567878232	Supramodal
LatentSpace_v12	Posterior parietal association areas	planum temporale	0.8831734132929131	Supramodal
LatentSpace_v12	Perirhinal area	parahippocampal gyrus	0.8651697046783826	Supramodal
LatentSpace_v12	Primary somatosensory area	transverse gyri	0.9378863470714308	Sensorimotor
LatentSpace_v12	Supplemental somatosensory area	transverse gyri	0.8042702855810298	Sensorimotor
LatentSpace_v12	Temporal association areas	inferior temporal gyrus	0.8109487643984777	Supramodal
LatentSpace_v12	Visual areas	planum temporale	0.9124893077326781	Sensorimotor
LatentSpace_v13	Anterior cingulate area	superior frontal gyrus	0.8702236413986819	Supramodal
LatentSpace_v13	Infralimbic area	paraterminal gyrus	0.9074302931238474	Supramodal
LatentSpace_v13	Retrosplenial area	planum temporale	0.7132608127339123	Supramodal
LatentSpace_v13	Prelimbic area	gyrus rectus	0.8682382063239226	Supramodal
LatentSpace_v13	Primary auditory area	planum temporale	0.8723942418526618	Sensorimotor
LatentSpace_v13	Dorsal auditory area	planum temporale	0.9085959175123495	Sensorimotor
LatentSpace_v13	Ventral auditory area	frontal pole	0.8447522889490421	Sensorimotor
LatentSpace_v13	Agranular insular area	gyrus rectus	0.857216573414814	Supramodal
LatentSpace_v13	Ectorhinal area	claustrum	0.9375994911819545	Supramodal
LatentSpace_v13	Primary motor area	paracentral lobule, anterior part	0.9673342416559609	Sensorimotor
LatentSpace_v13	Secondary motor area	middle frontal gyrus	0.9262553223710598	Sensorimotor
LatentSpace_v13	Frontal pole, cerebral cortex	posterior orbital gyrus	0.8040798119679402	Supramodal
LatentSpace_v13	Orbital area	gyrus rectus	0.8849826310693083	Supramodal
LatentSpace_v13	Posterior parietal association areas	planum temporale	0.8333004834868837	Supramodal
LatentSpace_v13	Perirhinal area	claustrum	0.8122054524017394	Supramodal
LatentSpace_v13	Primary somatosensory area	inferior occipital gyrus	0.9755679859251337	Sensorimotor
LatentSpace_v13	Supplemental somatosensory area	inferior frontal gyrus	0.8791465245495531	Sensorimotor
LatentSpace_v13	Temporal association areas	inferior temporal gyrus	0.8369555806520673	Supramodal
LatentSpace_v13	Visual areas	planum temporale	0.8612483947398838	Sensorimotor
LatentSpace_v14	Anterior cingulate area	superior frontal gyrus	0.8900273257301435	Supramodal
LatentSpace_v14	Infralimbic area	paraterminal gyrus	0.7829010211097143	Supramodal
LatentSpace_v14	Retrosplenial area	lingual gyrus	0.7783946739815184	Supramodal
LatentSpace_v14	Prelimbic area	gyrus rectus	0.8426718051438145	Supramodal
LatentSpace_v14	Primary auditory area	lateral orbital gyrus	0.8886801127438584	Sensorimotor
LatentSpace_v14	Dorsal auditory area	planum temporale	0.9213013076808756	Sensorimotor
LatentSpace_v14	Ventral auditory area	lateral orbital gyrus	0.8405721193892616	Sensorimotor
LatentSpace_v14	Agranular insular area	claustrum	0.8281411864908613	Supramodal
LatentSpace_v14	Ectorhinal area	claustrum	0.9557420170830155	Supramodal
LatentSpace_v14	Primary motor area	paracentral lobule, anterior part	0.9531305156543237	Sensorimotor
LatentSpace_v14	Secondary motor area	superior frontal gyrus	0.9139443654377755	Sensorimotor
LatentSpace_v14	Frontal pole, cerebral cortex	gyrus rectus	0.7663899232615969	Supramodal
LatentSpace_v14	Orbital area	temporal pole	0.8485416828596436	Supramodal
LatentSpace_v14	Posterior parietal association areas	planum temporale	0.9045857221792195	Supramodal
LatentSpace_v14	Perirhinal area	parahippocampal gyrus	0.8159097960220175	Supramodal
LatentSpace_v14	Primary somatosensory area	transverse gyri	0.9616431333640201	Sensorimotor
LatentSpace_v14	Supplemental somatosensory area	inferior frontal gyrus	0.851439725574875	Sensorimotor
LatentSpace_v14	Temporal association areas	insula	0.8538909563579178	Supramodal
LatentSpace_v14	Visual areas	planum temporale	0.9043860925108274	Sensorimotor
LatentSpace_v15	Anterior cingulate area	superior frontal gyrus	0.8724195615078687	Supramodal
LatentSpace_v15	Infralimbic area	CA1 field	0.8334789269583247	Supramodal
LatentSpace_v15	Retrosplenial area	planum temporale	0.7082857145364214	Supramodal
LatentSpace_v15	Prelimbic area	claustrum	0.8313105167642997	Supramodal
LatentSpace_v15	Primary auditory area	frontal pole	0.8956729069112755	Sensorimotor
LatentSpace_v15	Dorsal auditory area	paracentral lobule, posterior part	0.9229812202514128	Sensorimotor
LatentSpace_v15	Ventral auditory area	inferior temporal gyrus	0.8682539453030591	Sensorimotor
LatentSpace_v15	Agranular insular area	claustrum	0.9085832523098862	Supramodal
LatentSpace_v15	Ectorhinal area	claustrum	0.9126380042637132	Supramodal
LatentSpace_v15	Primary motor area	paracentral lobule, anterior part	0.9516016877566015	Sensorimotor
LatentSpace_v15	Secondary motor area	superior frontal gyrus	0.9330860323576382	Sensorimotor
LatentSpace_v15	Frontal pole, cerebral cortex	claustrum	0.7728845833594405	Supramodal
LatentSpace_v15	Orbital area	claustrum	0.8921921476539794	Supramodal
LatentSpace_v15	Posterior parietal association areas	planum temporale	0.859130031208017	Supramodal
LatentSpace_v15	Perirhinal area	claustrum	0.7961637085946273	Supramodal
LatentSpace_v15	Primary somatosensory area	occipital pole	0.9604814433536996	Sensorimotor
LatentSpace_v15	Supplemental somatosensory area	middle temporal gyrus	0.8398950392650957	Sensorimotor
LatentSpace_v15	Temporal association areas	inferior rostral gyrus	0.8663325657231592	Supramodal
LatentSpace_v15	Visual areas	planum temporale	0.8885825025906995	Sensorimotor
LatentSpace_v16	Anterior cingulate area	superior frontal gyrus	0.8693209693647749	Supramodal
LatentSpace_v16	Infralimbic area	paraterminal gyrus	0.8963099938937955	Supramodal
LatentSpace_v16	Retrosplenial area	cuneus	0.6825976221412403	Supramodal
LatentSpace_v16	Prelimbic area	superior rostral gyrus	0.8250415601580124	Supramodal
LatentSpace_v16	Primary auditory area	frontal pole	0.820829155752887	Sensorimotor
LatentSpace_v16	Dorsal auditory area	planum temporale	0.8698809314710189	Sensorimotor
LatentSpace_v16	Ventral auditory area	frontal pole	0.781070857421158	Sensorimotor
LatentSpace_v16	Agranular insular area	posterior orbital gyrus	0.8304134798067218	Supramodal
LatentSpace_v16	Ectorhinal area	temporal pole	0.878380043209751	Supramodal
LatentSpace_v16	Primary motor area	paracentral lobule, anterior part	0.9574252089646399	Sensorimotor
LatentSpace_v16	Secondary motor area	superior frontal gyrus	0.9141314079560799	Sensorimotor
LatentSpace_v16	Frontal pole, cerebral cortex	posterior orbital gyrus	0.779016473405086	Supramodal
LatentSpace_v16	Orbital area	temporal pole	0.8505021897121684	Supramodal
LatentSpace_v16	Posterior parietal association areas	planum temporale	0.8279273700087231	Supramodal
LatentSpace_v16	Perirhinal area	parahippocampal gyrus	0.811347846959941	Supramodal
LatentSpace_v16	Primary somatosensory area	transverse gyri	0.9652627287346421	Sensorimotor
LatentSpace_v16	Supplemental somatosensory area	lateral orbital gyrus	0.8452465653461455	Sensorimotor
LatentSpace_v16	Temporal association areas	inferior rostral gyrus	0.7706798392633744	Supramodal
LatentSpace_v16	Visual areas	planum temporale	0.8287615177215638	Sensorimotor
LatentSpace_v17	Anterior cingulate area	middle frontal gyrus	0.9475170242327048	Supramodal
LatentSpace_v17	Infralimbic area	CA2 field	0.8699690056852893	Supramodal
LatentSpace_v17	Retrosplenial area	superior parietal lobule	0.8195106789964545	Supramodal
LatentSpace_v17	Prelimbic area	superior rostral gyrus	0.8806710411267892	Supramodal
LatentSpace_v17	Primary auditory area	planum temporale	0.8288208760855731	Sensorimotor
LatentSpace_v17	Dorsal auditory area	transverse gyri	0.8981097642467033	Sensorimotor
LatentSpace_v17	Ventral auditory area	lateral orbital gyrus	0.7571333788522001	Sensorimotor
LatentSpace_v17	Agranular insular area	claustrum	0.8580103713163885	Supramodal
LatentSpace_v17	Ectorhinal area	claustrum	0.863582749411019	Supramodal
LatentSpace_v17	Primary motor area	paracentral lobule, anterior part	0.957075181361229	Sensorimotor
LatentSpace_v17	Secondary motor area	middle frontal gyrus	0.9414869388551884	Sensorimotor
LatentSpace_v17	Frontal pole, cerebral cortex	posterior orbital gyrus	0.7940370509599488	Supramodal
LatentSpace_v17	Orbital area	claustrum	0.921264781872413	Supramodal
LatentSpace_v17	Posterior parietal association areas	planum temporale	0.9201370658377876	Supramodal
LatentSpace_v17	Perirhinal area	parahippocampal gyrus	0.7812712163702334	Supramodal
LatentSpace_v17	Primary somatosensory area	occipital pole	0.938349411964744	Sensorimotor
LatentSpace_v17	Supplemental somatosensory area	Heschl's gyrus	0.7510294573071	Sensorimotor
LatentSpace_v17	Temporal association areas	insula	0.7606237561667819	Supramodal
LatentSpace_v17	Visual areas	planum temporale	0.9170108505587097	Sensorimotor
LatentSpace_v18	Anterior cingulate area	superior frontal gyrus	0.9081254792965173	Supramodal
LatentSpace_v18	Infralimbic area	subiculum	0.8164512461234403	Supramodal
LatentSpace_v18	Retrosplenial area	superior occipital gyrus	0.7680790710129164	Supramodal
LatentSpace_v18	Prelimbic area	parolfactory gyri	0.8543235918646506	Supramodal
LatentSpace_v18	Primary auditory area	lateral orbital gyrus	0.8804503335293598	Sensorimotor
LatentSpace_v18	Dorsal auditory area	transverse gyri	0.9192732597478711	Sensorimotor
LatentSpace_v18	Ventral auditory area	lateral orbital gyrus	0.859176566686016	Sensorimotor
LatentSpace_v18	Agranular insular area	claustrum	0.90207947687966	Supramodal
LatentSpace_v18	Ectorhinal area	insula	0.8921152033021756	Supramodal
LatentSpace_v18	Primary motor area	paracentral lobule, anterior part	0.9628057133458705	Sensorimotor
LatentSpace_v18	Secondary motor area	superior frontal gyrus	0.9281092373324118	Sensorimotor
LatentSpace_v18	Frontal pole, cerebral cortex	posterior orbital gyrus	0.7758956949218907	Supramodal
LatentSpace_v18	Orbital area	parolfactory gyri	0.8980117344556482	Supramodal
LatentSpace_v18	Posterior parietal association areas	planum temporale	0.9170679580798776	Supramodal
LatentSpace_v18	Perirhinal area	parahippocampal gyrus	0.8436447872010814	Supramodal
LatentSpace_v18	Primary somatosensory area	transverse gyri	0.9616399778499366	Sensorimotor
LatentSpace_v18	Supplemental somatosensory area	lateral orbital gyrus	0.8604049156061958	Sensorimotor
LatentSpace_v18	Temporal association areas	inferior rostral gyrus	0.8551510874721483	Supramodal
LatentSpace_v18	Visual areas	planum temporale	0.9230097063877027	Sensorimotor
LatentSpace_v19	Anterior cingulate area	superior frontal gyrus	0.9432125810676205	Supramodal
LatentSpace_v19	Infralimbic area	paraterminal gyrus	0.8220511911321282	Supramodal
LatentSpace_v19	Retrosplenial area	planum temporale	0.7947316666629952	Supramodal
LatentSpace_v19	Prelimbic area	gyrus rectus	0.8954769880361515	Supramodal
LatentSpace_v19	Primary auditory area	frontal pole	0.8378838387683515	Sensorimotor
LatentSpace_v19	Dorsal auditory area	planum temporale	0.8869709253641367	Sensorimotor
LatentSpace_v19	Ventral auditory area	inferior temporal gyrus	0.821931586511569	Sensorimotor
LatentSpace_v19	Agranular insular area	claustrum	0.8886878068282379	Supramodal
LatentSpace_v19	Ectorhinal area	temporal pole	0.918197531409099	Supramodal
LatentSpace_v19	Primary motor area	paracentral lobule, anterior part	0.9599145882730411	Sensorimotor
LatentSpace_v19	Secondary motor area	superior frontal gyrus	0.9467660685242326	Sensorimotor
LatentSpace_v19	Frontal pole, cerebral cortex	posterior orbital gyrus	0.824611950762727	Supramodal
LatentSpace_v19	Orbital area	parolfactory gyri	0.9201854753737034	Supramodal
LatentSpace_v19	Posterior parietal association areas	planum temporale	0.9240187644706093	Supramodal
LatentSpace_v19	Perirhinal area	parahippocampal gyrus	0.8586895352808619	Supramodal
LatentSpace_v19	Primary somatosensory area	transverse gyri	0.954495918069614	Sensorimotor
LatentSpace_v19	Supplemental somatosensory area	inferior frontal gyrus	0.846160252454527	Sensorimotor
LatentSpace_v19	Temporal association areas	insula	0.8686871391704745	Supramodal
LatentSpace_v19	Visual areas	planum temporale	0.9225283220008234	Sensorimotor
LatentSpace_v20	Anterior cingulate area	superior frontal gyrus	0.9283081898795199	Supramodal
LatentSpace_v20	Infralimbic area	CA2 field	0.8995042612822367	Supramodal
LatentSpace_v20	Retrosplenial area	paracentral lobule, posterior part	0.7595793981873191	Supramodal
LatentSpace_v20	Prelimbic area	parolfactory gyri	0.8400847993654762	Supramodal
LatentSpace_v20	Primary auditory area	planum temporale	0.9024373911584322	Sensorimotor
LatentSpace_v20	Dorsal auditory area	transverse gyri	0.9265929994630699	Sensorimotor
LatentSpace_v20	Ventral auditory area	lateral orbital gyrus	0.8693937013710158	Sensorimotor
LatentSpace_v20	Agranular insular area	claustrum	0.888844364540678	Supramodal
LatentSpace_v20	Ectorhinal area	temporal pole	0.90106905334369	Supramodal
LatentSpace_v20	Primary motor area	paracentral lobule, anterior part	0.9599262662071432	Sensorimotor
LatentSpace_v20	Secondary motor area	superior frontal gyrus	0.9163918037819712	Sensorimotor
LatentSpace_v20	Frontal pole, cerebral cortex	claustrum	0.8112585622200716	Supramodal
LatentSpace_v20	Orbital area	claustrum	0.928744202762382	Supramodal
LatentSpace_v20	Posterior parietal association areas	planum temporale	0.8757431468139661	Supramodal
LatentSpace_v20	Perirhinal area	parahippocampal gyrus	0.8644411583179404	Supramodal
LatentSpace_v20	Primary somatosensory area	transverse gyri	0.9612423700070487	Sensorimotor
LatentSpace_v20	Supplemental somatosensory area	occipito-temporal gyrus	0.8692037317347754	Sensorimotor
LatentSpace_v20	Temporal association areas	insula	0.8713225565065338	Supramodal
LatentSpace_v20	Visual areas	planum temporale	0.8741313029643574	Sensorimotor
LatentSpace_v21	Anterior cingulate area	superior frontal gyrus	0.8860254984630125	Supramodal
LatentSpace_v21	Infralimbic area	CA2 field	0.8719204609372793	Supramodal
LatentSpace_v21	Retrosplenial area	cuneus	0.773444716332978	Supramodal
LatentSpace_v21	Prelimbic area	temporal pole	0.8522431680896493	Supramodal
LatentSpace_v21	Primary auditory area	planum temporale	0.8846548598189615	Sensorimotor
LatentSpace_v21	Dorsal auditory area	planum temporale	0.9228773763789168	Sensorimotor
LatentSpace_v21	Ventral auditory area	lateral orbital gyrus	0.8354414758231612	Sensorimotor
LatentSpace_v21	Agranular insular area	claustrum	0.8007072935596513	Supramodal
LatentSpace_v21	Ectorhinal area	insula	0.8816106987011033	Supramodal
LatentSpace_v21	Primary motor area	paracentral lobule, anterior part	0.9402571799309932	Sensorimotor
LatentSpace_v21	Secondary motor area	middle frontal gyrus	0.9057300634223524	Sensorimotor
LatentSpace_v21	Frontal pole, cerebral cortex	superior rostral gyrus	0.7303040987600513	Supramodal
LatentSpace_v21	Orbital area	temporal pole	0.8623011035917494	Supramodal
LatentSpace_v21	Posterior parietal association areas	planum temporale	0.8900794472424152	Supramodal
LatentSpace_v21	Perirhinal area	parahippocampal gyrus	0.8636107097523654	Supramodal
LatentSpace_v21	Primary somatosensory area	transverse gyri	0.9429516029840915	Sensorimotor
LatentSpace_v21	Supplemental somatosensory area	Heschl's gyrus	0.8077856138313252	Sensorimotor
LatentSpace_v21	Temporal association areas	insula	0.8231440061510307	Supramodal
LatentSpace_v21	Visual areas	planum temporale	0.9088770268773061	Sensorimotor
LatentSpace_v22	Anterior cingulate area	superior frontal gyrus	0.8408051172631399	Supramodal
LatentSpace_v22	Infralimbic area	subiculum	0.8561381032921788	Supramodal
LatentSpace_v22	Retrosplenial area	planum temporale	0.7103964031282374	Supramodal
LatentSpace_v22	Prelimbic area	gyrus rectus	0.8090217842564149	Supramodal
LatentSpace_v22	Primary auditory area	lateral orbital gyrus	0.8611980179677613	Sensorimotor
LatentSpace_v22	Dorsal auditory area	planum temporale	0.9034324768120192	Sensorimotor
LatentSpace_v22	Ventral auditory area	inferior temporal gyrus	0.8133585967536151	Sensorimotor
LatentSpace_v22	Agranular insular area	claustrum	0.808778655114334	Supramodal
LatentSpace_v22	Ectorhinal area	claustrum	0.9592895321306681	Supramodal
LatentSpace_v22	Primary motor area	paracentral lobule, anterior part	0.9555853465436952	Sensorimotor
LatentSpace_v22	Secondary motor area	superior frontal gyrus	0.9013749650330617	Sensorimotor
LatentSpace_v22	Frontal pole, cerebral cortex	posterior orbital gyrus	0.7190552199138277	Supramodal
LatentSpace_v22	Orbital area	temporal pole	0.8647314504607948	Supramodal
LatentSpace_v22	Posterior parietal association areas	planum temporale	0.8742018580421377	Supramodal
LatentSpace_v22	Perirhinal area	claustrum	0.8626384530851903	Supramodal
LatentSpace_v22	Primary somatosensory area	transverse gyri	0.9644762376249331	Sensorimotor
LatentSpace_v22	Supplemental somatosensory area	inferior frontal gyrus	0.84494076247318	Sensorimotor
LatentSpace_v22	Temporal association areas	insula	0.857448704636766	Supramodal
LatentSpace_v22	Visual areas	planum temporale	0.8851806696195035	Sensorimotor
LatentSpace_v23	Anterior cingulate area	cingulate gyrus	0.876642391933958	Supramodal
LatentSpace_v23	Infralimbic area	paraterminal gyrus	0.8336523732439697	Supramodal
LatentSpace_v23	Retrosplenial area	planum temporale	0.6650712146391676	Supramodal
LatentSpace_v23	Prelimbic area	gyrus rectus	0.8588840847803754	Supramodal
LatentSpace_v23	Primary auditory area	planum temporale	0.8469726794010116	Sensorimotor
LatentSpace_v23	Dorsal auditory area	planum temporale	0.8877807992876466	Sensorimotor
LatentSpace_v23	Ventral auditory area	planum temporale	0.7602710171543118	Sensorimotor
LatentSpace_v23	Agranular insular area	claustrum	0.8733303344500011	Supramodal
LatentSpace_v23	Ectorhinal area	insula	0.8576688048206993	Supramodal
LatentSpace_v23	Primary motor area	paracentral lobule, anterior part	0.9506082290530764	Sensorimotor
LatentSpace_v23	Secondary motor area	superior frontal gyrus	0.9225689178817427	Sensorimotor
LatentSpace_v23	Frontal pole, cerebral cortex	posterior orbital gyrus	0.7853273413419471	Supramodal
LatentSpace_v23	Orbital area	gyrus rectus	0.9027002142103094	Supramodal
LatentSpace_v23	Posterior parietal association areas	planum temporale	0.8224083128858835	Supramodal
LatentSpace_v23	Perirhinal area	parahippocampal gyrus	0.7797260907044182	Supramodal
LatentSpace_v23	Primary somatosensory area	occipital pole	0.9534199793546223	Sensorimotor
LatentSpace_v23	Supplemental somatosensory area	transverse gyri	0.8100135538158446	Sensorimotor
LatentSpace_v23	Temporal association areas	insula	0.7689134430721466	Supramodal
LatentSpace_v23	Visual areas	planum temporale	0.8553628083711948	Sensorimotor
LatentSpace_v24	Anterior cingulate area	superior frontal gyrus	0.9332014373351389	Supramodal
LatentSpace_v24	Infralimbic area	subiculum	0.8584235536113658	Supramodal
LatentSpace_v24	Retrosplenial area	planum temporale	0.7672394907391802	Supramodal
LatentSpace_v24	Prelimbic area	gyrus rectus	0.8986838735371765	Supramodal
LatentSpace_v24	Primary auditory area	paracentral lobule, posterior part	0.8398388231730571	Sensorimotor
LatentSpace_v24	Dorsal auditory area	paracentral lobule, posterior part	0.8945339491169794	Sensorimotor
LatentSpace_v24	Ventral auditory area	lateral orbital gyrus	0.7556057742103682	Sensorimotor
LatentSpace_v24	Agranular insular area	claustrum	0.9104793059654553	Supramodal
LatentSpace_v24	Ectorhinal area	insula	0.8622062264099398	Supramodal
LatentSpace_v24	Primary motor area	paracentral lobule, anterior part	0.9681743624584553	Sensorimotor
LatentSpace_v24	Secondary motor area	middle frontal gyrus	0.9508775714318746	Sensorimotor
LatentSpace_v24	Frontal pole, cerebral cortex	posterior orbital gyrus	0.8205373978675109	Supramodal
LatentSpace_v24	Orbital area	claustrum	0.9233032469923715	Supramodal
LatentSpace_v24	Posterior parietal association areas	planum temporale	0.8888632413143763	Supramodal
LatentSpace_v24	Perirhinal area	temporal pole	0.8188358469889193	Supramodal
LatentSpace_v24	Primary somatosensory area	occipital pole	0.9768150400243658	Sensorimotor
LatentSpace_v24	Supplemental somatosensory area	occipital pole	0.7946384900485801	Sensorimotor
LatentSpace_v24	Temporal association areas	inferior rostral gyrus	0.803803049404292	Supramodal
LatentSpace_v24	Visual areas	planum temporale	0.8968922783636541	Sensorimotor
LatentSpace_v25	Anterior cingulate area	superior frontal gyrus	0.8834282059600502	Supramodal
LatentSpace_v25	Infralimbic area	dentate gyrus	0.830114991762471	Supramodal
LatentSpace_v25	Retrosplenial area	planum temporale	0.7172250746102172	Supramodal
LatentSpace_v25	Prelimbic area	gyrus rectus	0.8915514711925525	Supramodal
LatentSpace_v25	Primary auditory area	frontal pole	0.8777004024818331	Sensorimotor
LatentSpace_v25	Dorsal auditory area	transverse gyri	0.9020753896876456	Sensorimotor
LatentSpace_v25	Ventral auditory area	frontal pole	0.8651781435266747	Sensorimotor
LatentSpace_v25	Agranular insular area	temporal pole	0.8297518193057034	Supramodal
LatentSpace_v25	Ectorhinal area	claustrum	0.9391412243300744	Supramodal
LatentSpace_v25	Primary motor area	paracentral lobule, anterior part	0.9778890068651229	Sensorimotor
LatentSpace_v25	Secondary motor area	superior frontal gyrus	0.9339122532106928	Sensorimotor
LatentSpace_v25	Frontal pole, cerebral cortex	cingulate gyrus	0.816660621030711	Supramodal
LatentSpace_v25	Orbital area	temporal pole	0.8706979785431972	Supramodal
LatentSpace_v25	Posterior parietal association areas	planum temporale	0.8431149324543081	Supramodal
LatentSpace_v25	Perirhinal area	parahippocampal gyrus	0.81842212719747	Supramodal
LatentSpace_v25	Primary somatosensory area	occipital pole	0.978783639008464	Sensorimotor
LatentSpace_v25	Supplemental somatosensory area	transverse gyri	0.8789381026110564	Sensorimotor
LatentSpace_v25	Temporal association areas	posterior orbital gyrus	0.8534064861870733	Supramodal
LatentSpace_v25	Visual areas	planum temporale	0.8433787139992984	Sensorimotor
LatentSpace_v26	Anterior cingulate area	anterior orbital gyrus	0.9324823518901902	Supramodal
LatentSpace_v26	Infralimbic area	paraterminal gyrus	0.9083694740725803	Supramodal
LatentSpace_v26	Retrosplenial area	planum temporale	0.7872234879164173	Supramodal
LatentSpace_v26	Prelimbic area	temporal pole	0.902186634600508	Supramodal
LatentSpace_v26	Primary auditory area	planum temporale	0.8933872722319497	Sensorimotor
LatentSpace_v26	Dorsal auditory area	planum temporale	0.930213253168808	Sensorimotor
LatentSpace_v26	Ventral auditory area	planum temporale	0.8153406502270002	Sensorimotor
LatentSpace_v26	Agranular insular area	claustrum	0.8980378234637734	Supramodal
LatentSpace_v26	Ectorhinal area	claustrum	0.9309438499760548	Supramodal
LatentSpace_v26	Primary motor area	paracentral lobule, anterior part	0.950086137907788	Sensorimotor
LatentSpace_v26	Secondary motor area	superior frontal gyrus	0.932990659395626	Sensorimotor
LatentSpace_v26	Frontal pole, cerebral cortex	posterior orbital gyrus	0.8266697985855029	Supramodal
LatentSpace_v26	Orbital area	parolfactory gyri	0.9218920751524589	Supramodal
LatentSpace_v26	Posterior parietal association areas	planum temporale	0.9148968516315498	Supramodal
LatentSpace_v26	Perirhinal area	parahippocampal gyrus	0.8350713242500135	Supramodal
LatentSpace_v26	Primary somatosensory area	transverse gyri	0.9407995066385003	Sensorimotor
LatentSpace_v26	Supplemental somatosensory area	inferior frontal gyrus	0.8199530264824388	Sensorimotor
LatentSpace_v26	Temporal association areas	inferior temporal gyrus	0.8303181514638911	Supramodal
LatentSpace_v26	Visual areas	transverse gyri	0.9165871525425633	Sensorimotor
LatentSpace_v27	Anterior cingulate area	superior frontal gyrus	0.9262711352640772	Supramodal
LatentSpace_v27	Infralimbic area	subiculum	0.7986251372172971	Supramodal
LatentSpace_v27	Retrosplenial area	precentral gyrus	0.7071720143592097	Supramodal
LatentSpace_v27	Prelimbic area	claustrum	0.8769209398518215	Supramodal
LatentSpace_v27	Primary auditory area	frontal pole	0.8474579210611624	Sensorimotor
LatentSpace_v27	Dorsal auditory area	planum temporale	0.8863627167598968	Sensorimotor
LatentSpace_v27	Ventral auditory area	lateral orbital gyrus	0.8360704899208417	Sensorimotor
LatentSpace_v27	Agranular insular area	claustrum	0.909149146513278	Supramodal
LatentSpace_v27	Ectorhinal area	temporal pole	0.8836883642347233	Supramodal
LatentSpace_v27	Primary motor area	paracentral lobule, anterior part	0.9401817825166289	Sensorimotor
LatentSpace_v27	Secondary motor area	paracentral lobule, anterior part	0.8700637544877503	Sensorimotor
LatentSpace_v27	Frontal pole, cerebral cortex	claustrum	0.7805096982890831	Supramodal
LatentSpace_v27	Orbital area	claustrum	0.9079849149027449	Supramodal
LatentSpace_v27	Posterior parietal association areas	superior parietal lobule	0.8151895939392386	Supramodal
LatentSpace_v27	Perirhinal area	parahippocampal gyrus	0.8362411491030244	Supramodal
LatentSpace_v27	Primary somatosensory area	occipital pole	0.9661780788146204	Sensorimotor
LatentSpace_v27	Supplemental somatosensory area	inferior frontal gyrus	0.8631794715935108	Sensorimotor
LatentSpace_v27	Temporal association areas	insula	0.8345402488232214	Supramodal
LatentSpace_v27	Visual areas	planum temporale	0.8234787119606545	Sensorimotor
LatentSpace_v28	Anterior cingulate area	cingulate gyrus	0.904774585831143	Supramodal
LatentSpace_v28	Infralimbic area	subiculum	0.8295110603593643	Supramodal
LatentSpace_v28	Retrosplenial area	planum temporale	0.7391826042678775	Supramodal
LatentSpace_v28	Prelimbic area	claustrum	0.8400311569395684	Supramodal
LatentSpace_v28	Primary auditory area	planum temporale	0.9038043910923486	Sensorimotor
LatentSpace_v28	Dorsal auditory area	planum temporale	0.9338433221600315	Sensorimotor
LatentSpace_v28	Ventral auditory area	planum temporale	0.8606758680986906	Sensorimotor
LatentSpace_v28	Agranular insular area	claustrum	0.8840600376073331	Supramodal
LatentSpace_v28	Ectorhinal area	inferior rostral gyrus	0.9260698638165733	Supramodal
LatentSpace_v28	Primary motor area	paracentral lobule, anterior part	0.9580943542431044	Sensorimotor
LatentSpace_v28	Secondary motor area	frontal pole	0.9222514190428232	Sensorimotor
LatentSpace_v28	Frontal pole, cerebral cortex	posterior orbital gyrus	0.8051954903125228	Supramodal
LatentSpace_v28	Orbital area	claustrum	0.8741409650258508	Supramodal
LatentSpace_v28	Posterior parietal association areas	planum temporale	0.856869237330512	Supramodal
LatentSpace_v28	Perirhinal area	parahippocampal gyrus	0.8217333561408633	Supramodal
LatentSpace_v28	Primary somatosensory area	inferior occipital gyrus	0.9728854491400486	Sensorimotor
LatentSpace_v28	Supplemental somatosensory area	inferior frontal gyrus	0.8873537777258172	Sensorimotor
LatentSpace_v28	Temporal association areas	inferior rostral gyrus	0.8620736656922422	Supramodal
LatentSpace_v28	Visual areas	planum temporale	0.8723677025339885	Sensorimotor
LatentSpace_v29	Anterior cingulate area	superior frontal gyrus	0.9119313008834168	Supramodal
LatentSpace_v29	Infralimbic area	dentate gyrus	0.8434454126821886	Supramodal
LatentSpace_v29	Retrosplenial area	planum temporale	0.7995225528573868	Supramodal
LatentSpace_v29	Prelimbic area	gyrus rectus	0.8660622129355428	Supramodal
LatentSpace_v29	Primary auditory area	lateral orbital gyrus	0.8726408823365017	Sensorimotor
LatentSpace_v29	Dorsal auditory area	planum temporale	0.9166110049175218	Sensorimotor
LatentSpace_v29	Ventral auditory area	lateral orbital gyrus	0.8277964263843453	Sensorimotor
LatentSpace_v29	Agranular insular area	gyrus rectus	0.8541326303416799	Supramodal
LatentSpace_v29	Ectorhinal area	claustrum	0.9085774202992924	Supramodal
LatentSpace_v29	Primary motor area	paracentral lobule, anterior part	0.9598801861467223	Sensorimotor
LatentSpace_v29	Secondary motor area	middle frontal gyrus	0.9059680974485985	Sensorimotor
LatentSpace_v29	Frontal pole, cerebral cortex	posterior orbital gyrus	0.7879961300597996	Supramodal
LatentSpace_v29	Orbital area	gyrus rectus	0.8842994383958596	Supramodal
LatentSpace_v29	Posterior parietal association areas	planum temporale	0.8729877011780364	Supramodal
LatentSpace_v29	Perirhinal area	parahippocampal gyrus	0.8171353781278096	Supramodal
LatentSpace_v29	Primary somatosensory area	occipital pole	0.9674958956843074	Sensorimotor
LatentSpace_v29	Supplemental somatosensory area	inferior frontal gyrus	0.8403048837319846	Sensorimotor
LatentSpace_v29	Temporal association areas	inferior temporal gyrus	0.8515672519979822	Supramodal
LatentSpace_v29	Visual areas	planum temporale	0.9155169383832733	Sensorimotor
LatentSpace_v30	Anterior cingulate area	middle frontal gyrus	0.8900212588519244	Supramodal
LatentSpace_v30	Infralimbic area	subiculum	0.8281015365717384	Supramodal
LatentSpace_v30	Retrosplenial area	lingual gyrus	0.7411395966512745	Supramodal
LatentSpace_v30	Prelimbic area	gyrus rectus	0.8673094645620005	Supramodal
LatentSpace_v30	Primary auditory area	planum temporale	0.9022883313464755	Sensorimotor
LatentSpace_v30	Dorsal auditory area	planum temporale	0.9356654244614903	Sensorimotor
LatentSpace_v30	Ventral auditory area	lateral orbital gyrus	0.850551999141328	Sensorimotor
LatentSpace_v30	Agranular insular area	claustrum	0.8246780047108454	Supramodal
LatentSpace_v30	Ectorhinal area	claustrum	0.9376738098443997	Supramodal
LatentSpace_v30	Primary motor area	paracentral lobule, anterior part	0.9497979849649559	Sensorimotor
LatentSpace_v30	Secondary motor area	superior frontal gyrus	0.9094238895818066	Sensorimotor
LatentSpace_v30	Frontal pole, cerebral cortex	frontal pole	0.7798589819860899	Supramodal
LatentSpace_v30	Orbital area	gyrus rectus	0.8892985240847892	Supramodal
LatentSpace_v30	Posterior parietal association areas	planum temporale	0.8410494154828896	Supramodal
LatentSpace_v30	Perirhinal area	parahippocampal gyrus	0.8044709367898133	Supramodal
LatentSpace_v30	Primary somatosensory area	transverse gyri	0.9495215014517804	Sensorimotor
LatentSpace_v30	Supplemental somatosensory area	inferior frontal gyrus	0.8372506528561188	Sensorimotor
LatentSpace_v30	Temporal association areas	insula	0.8466899027970659	Supramodal
LatentSpace_v30	Visual areas	planum temporale	0.8851703853151712	Sensorimotor
LatentSpace_v31	Anterior cingulate area	cingulate gyrus	0.9138795281693924	Supramodal
LatentSpace_v31	Infralimbic area	subiculum	0.801424339679622	Supramodal
LatentSpace_v31	Retrosplenial area	planum temporale	0.754658029007169	Supramodal
LatentSpace_v31	Prelimbic area	temporal pole	0.8867260083325488	Supramodal
LatentSpace_v31	Primary auditory area	planum temporale	0.8658156385169686	Sensorimotor
LatentSpace_v31	Dorsal auditory area	transverse gyri	0.9003750017156935	Sensorimotor
LatentSpace_v31	Ventral auditory area	lateral orbital gyrus	0.8215601142342542	Sensorimotor
LatentSpace_v31	Agranular insular area	parolfactory gyri	0.8695775955663443	Supramodal
LatentSpace_v31	Ectorhinal area	claustrum	0.9385431408065497	Supramodal
LatentSpace_v31	Primary motor area	paracentral lobule, anterior part	0.9561736581868724	Sensorimotor
LatentSpace_v31	Secondary motor area	superior frontal gyrus	0.941323701978102	Sensorimotor
LatentSpace_v31	Frontal pole, cerebral cortex	superior rostral gyrus	0.8090090289456952	Supramodal
LatentSpace_v31	Orbital area	parolfactory gyri	0.9194611626120027	Supramodal
LatentSpace_v31	Posterior parietal association areas	planum temporale	0.8929669412662123	Supramodal
LatentSpace_v31	Perirhinal area	parahippocampal gyrus	0.8003528321185102	Supramodal
LatentSpace_v31	Primary somatosensory area	occipital pole	0.9301188832477494	Sensorimotor
LatentSpace_v31	Supplemental somatosensory area	inferior frontal gyrus	0.8060361135161683	Sensorimotor
LatentSpace_v31	Temporal association areas	inferior rostral gyrus	0.8323528571440548	Supramodal
LatentSpace_v31	Visual areas	planum temporale	0.8989456362176177	Sensorimotor
LatentSpace_v32	Anterior cingulate area	superior frontal gyrus	0.8953971447079473	Supramodal
LatentSpace_v32	Infralimbic area	dentate gyrus	0.8130553230499994	Supramodal
LatentSpace_v32	Retrosplenial area	planum temporale	0.7895582039548306	Supramodal
LatentSpace_v32	Prelimbic area	gyrus rectus	0.8557775813482653	Supramodal
LatentSpace_v32	Primary auditory area	frontal pole	0.8278047189402121	Sensorimotor
LatentSpace_v32	Dorsal auditory area	transverse gyri	0.8653221992440183	Sensorimotor
LatentSpace_v32	Ventral auditory area	lateral orbital gyrus	0.7581114887204717	Sensorimotor
LatentSpace_v32	Agranular insular area	claustrum	0.9211539041620384	Supramodal
LatentSpace_v32	Ectorhinal area	insula	0.8819418782405422	Supramodal
LatentSpace_v32	Primary motor area	paracentral lobule, anterior part	0.9570121169826064	Sensorimotor
LatentSpace_v32	Secondary motor area	middle frontal gyrus	0.9351584909261299	Sensorimotor
LatentSpace_v32	Frontal pole, cerebral cortex	posterior orbital gyrus	0.7485966265936119	Supramodal
LatentSpace_v32	Orbital area	claustrum	0.9051713812267584	Supramodal
LatentSpace_v32	Posterior parietal association areas	planum temporale	0.885650563524885	Supramodal
LatentSpace_v32	Perirhinal area	parahippocampal gyrus	0.8106560988513418	Supramodal
LatentSpace_v32	Primary somatosensory area	occipital pole	0.9446219213267792	Sensorimotor
LatentSpace_v32	Supplemental somatosensory area	inferior frontal gyrus	0.7621363508514859	Sensorimotor
LatentSpace_v32	Temporal association areas	insula	0.7943782655439348	Supramodal
LatentSpace_v32	Visual areas	planum temporale	0.898593137173684	Sensorimotor
LatentSpace_v33	Anterior cingulate area	cingulate gyrus	0.8495199774016439	Supramodal
LatentSpace_v33	Infralimbic area	dentate gyrus	0.8719551156103142	Supramodal
LatentSpace_v33	Retrosplenial area	planum temporale	0.711488437647116	Supramodal
LatentSpace_v33	Prelimbic area	CA1 field	0.8489265648824121	Supramodal
LatentSpace_v33	Primary auditory area	planum temporale	0.9140596451074796	Sensorimotor
LatentSpace_v33	Dorsal auditory area	planum temporale	0.948216013615683	Sensorimotor
LatentSpace_v33	Ventral auditory area	lateral orbital gyrus	0.8775081383344683	Sensorimotor
LatentSpace_v33	Agranular insular area	claustrum	0.8189448605475352	Supramodal
LatentSpace_v33	Ectorhinal area	claustrum	0.9231129179701625	Supramodal
LatentSpace_v33	Primary motor area	paracentral lobule, anterior part	0.9561642943286709	Sensorimotor
LatentSpace_v33	Secondary motor area	superior frontal gyrus	0.9133059608827286	Sensorimotor
LatentSpace_v33	Frontal pole, cerebral cortex	frontal pole	0.7345658099079657	Supramodal
LatentSpace_v33	Orbital area	claustrum	0.8610215561621367	Supramodal
LatentSpace_v33	Posterior parietal association areas	planum temporale	0.8577097238357614	Supramodal
LatentSpace_v33	Perirhinal area	parahippocampal gyrus	0.8457462590634736	Supramodal
LatentSpace_v33	Primary somatosensory area	occipital pole	0.975381534878816	Sensorimotor
LatentSpace_v33	Supplemental somatosensory area	inferior frontal gyrus	0.8804424781478014	Sensorimotor
LatentSpace_v33	Temporal association areas	insula	0.8832529191619358	Supramodal
LatentSpace_v33	Visual areas	planum temporale	0.9094896310312067	Sensorimotor
LatentSpace_v34	Anterior cingulate area	superior frontal gyrus	0.9119860621562568	Supramodal
LatentSpace_v34	Infralimbic area	subiculum	0.9010924126962099	Supramodal
LatentSpace_v34	Retrosplenial area	planum temporale	0.7029845928573192	Supramodal
LatentSpace_v34	Prelimbic area	inferior rostral gyrus	0.8752074746609615	Supramodal
LatentSpace_v34	Primary auditory area	frontal pole	0.8782652852203556	Sensorimotor
LatentSpace_v34	Dorsal auditory area	planum temporale	0.9114022352605103	Sensorimotor
LatentSpace_v34	Ventral auditory area	frontal pole	0.8230345718548538	Sensorimotor
LatentSpace_v34	Agranular insular area	gyrus rectus	0.8574850610575616	Supramodal
LatentSpace_v34	Ectorhinal area	insula	0.9038287423970229	Supramodal
LatentSpace_v34	Primary motor area	paracentral lobule, anterior part	0.9652705019610133	Sensorimotor
LatentSpace_v34	Secondary motor area	middle frontal gyrus	0.9208014045051206	Sensorimotor
LatentSpace_v34	Frontal pole, cerebral cortex	cingulate gyrus	0.7937745222729109	Supramodal
LatentSpace_v34	Orbital area	claustrum	0.8900982295122895	Supramodal
LatentSpace_v34	Posterior parietal association areas	planum temporale	0.8255499392223904	Supramodal
LatentSpace_v34	Perirhinal area	parahippocampal gyrus	0.861759772275443	Supramodal
LatentSpace_v34	Primary somatosensory area	transverse gyri	0.9667529142487867	Sensorimotor
LatentSpace_v34	Supplemental somatosensory area	occipito-temporal gyrus	0.8033622038713494	Sensorimotor
LatentSpace_v34	Temporal association areas	inferior temporal gyrus	0.7970834307321922	Supramodal
LatentSpace_v34	Visual areas	planum temporale	0.8615546472203547	Sensorimotor
LatentSpace_v35	Anterior cingulate area	superior frontal gyrus	0.9276641460418332	Supramodal
LatentSpace_v35	Infralimbic area	paraterminal gyrus	0.807430949963305	Supramodal
LatentSpace_v35	Retrosplenial area	paracentral lobule, posterior part	0.7726666165354109	Supramodal
LatentSpace_v35	Prelimbic area	parolfactory gyri	0.876895457031516	Supramodal
LatentSpace_v35	Primary auditory area	planum temporale	0.8753569888118714	Sensorimotor
LatentSpace_v35	Dorsal auditory area	planum temporale	0.9173327615696546	Sensorimotor
LatentSpace_v35	Ventral auditory area	middle temporal gyrus	0.8000281000284464	Sensorimotor
LatentSpace_v35	Agranular insular area	claustrum	0.8911372640217237	Supramodal
LatentSpace_v35	Ectorhinal area	temporal pole	0.8812648698349818	Supramodal
LatentSpace_v35	Primary motor area	paracentral lobule, anterior part	0.923505233199136	Sensorimotor
LatentSpace_v35	Secondary motor area	superior frontal gyrus	0.9057293318717767	Sensorimotor
LatentSpace_v35	Frontal pole, cerebral cortex	posterior orbital gyrus	0.8108393432403522	Supramodal
LatentSpace_v35	Orbital area	claustrum	0.9229548618740337	Supramodal
LatentSpace_v35	Posterior parietal association areas	planum temporale	0.8540869393723858	Supramodal
LatentSpace_v35	Perirhinal area	parahippocampal gyrus	0.8730538298536863	Supramodal
LatentSpace_v35	Primary somatosensory area	occipital pole	0.9511921586054687	Sensorimotor
LatentSpace_v35	Supplemental somatosensory area	transverse gyri	0.8238961609702468	Sensorimotor
LatentSpace_v35	Temporal association areas	insula	0.8265264009555314	Supramodal
LatentSpace_v35	Visual areas	planum temporale	0.8764048355521364	Sensorimotor
LatentSpace_v36	Anterior cingulate area	middle frontal gyrus	0.8621685264511069	Supramodal
LatentSpace_v36	Infralimbic area	subiculum	0.7960466929039737	Supramodal
LatentSpace_v36	Retrosplenial area	planum temporale	0.7712187991435095	Supramodal
LatentSpace_v36	Prelimbic area	medial orbital gyrus	0.8187986674940049	Supramodal
LatentSpace_v36	Primary auditory area	planum temporale	0.8694490528486161	Sensorimotor
LatentSpace_v36	Dorsal auditory area	transverse gyri	0.9167179407116245	Sensorimotor
LatentSpace_v36	Ventral auditory area	frontal pole	0.7908969846787148	Sensorimotor
LatentSpace_v36	Agranular insular area	gyrus rectus	0.8295254778729271	Supramodal
LatentSpace_v36	Ectorhinal area	claustrum	0.9135575188647697	Supramodal
LatentSpace_v36	Primary motor area	paracentral lobule, anterior part	0.9667757020771723	Sensorimotor
LatentSpace_v36	Secondary motor area	paracentral lobule, anterior part	0.9093593101574481	Sensorimotor
LatentSpace_v36	Frontal pole, cerebral cortex	posterior orbital gyrus	0.7304590197872516	Supramodal
LatentSpace_v36	Orbital area	gyrus rectus	0.8875508943622009	Supramodal
LatentSpace_v36	Posterior parietal association areas	planum temporale	0.907504708392092	Supramodal
LatentSpace_v36	Perirhinal area	parahippocampal gyrus	0.840989981970355	Supramodal
LatentSpace_v36	Primary somatosensory area	occipital pole	0.9565346593995631	Sensorimotor
LatentSpace_v36	Supplemental somatosensory area	transverse gyri	0.7860638696992474	Sensorimotor
LatentSpace_v36	Temporal association areas	inferior temporal gyrus	0.8003517518148419	Supramodal
LatentSpace_v36	Visual areas	planum temporale	0.9004131197750289	Sensorimotor
LatentSpace_v37	Anterior cingulate area	superior frontal gyrus	0.9338738877555773	Supramodal
LatentSpace_v37	Infralimbic area	subiculum	0.9028903498838832	Supramodal
LatentSpace_v37	Retrosplenial area	planum temporale	0.7753966138608386	Supramodal
LatentSpace_v37	Prelimbic area	gyrus rectus	0.9038652377837544	Supramodal
LatentSpace_v37	Primary auditory area	planum temporale	0.8871884219094839	Sensorimotor
LatentSpace_v37	Dorsal auditory area	transverse gyri	0.9185804906813333	Sensorimotor
LatentSpace_v37	Ventral auditory area	lateral orbital gyrus	0.8442845760494507	Sensorimotor
LatentSpace_v37	Agranular insular area	claustrum	0.8829010263787532	Supramodal
LatentSpace_v37	Ectorhinal area	claustrum	0.9168270697064042	Supramodal
LatentSpace_v37	Primary motor area	paracentral lobule, anterior part	0.9788889684965447	Sensorimotor
LatentSpace_v37	Secondary motor area	middle frontal gyrus	0.9360519290582313	Sensorimotor
LatentSpace_v37	Frontal pole, cerebral cortex	posterior orbital gyrus	0.8352885903636522	Supramodal
LatentSpace_v37	Orbital area	parolfactory gyri	0.9275644311940632	Supramodal
LatentSpace_v37	Posterior parietal association areas	planum temporale	0.8850363079937908	Supramodal
LatentSpace_v37	Perirhinal area	parahippocampal gyrus	0.8755298223276532	Supramodal
LatentSpace_v37	Primary somatosensory area	occipital pole	0.9665737477414055	Sensorimotor
LatentSpace_v37	Supplemental somatosensory area	Heschl's gyrus	0.860130457844062	Sensorimotor
LatentSpace_v37	Temporal association areas	inferior temporal gyrus	0.8676410448569832	Supramodal
LatentSpace_v37	Visual areas	transverse gyri	0.8822701272192931	Sensorimotor
LatentSpace_v38	Anterior cingulate area	superior rostral gyrus	0.8695737096905646	Supramodal
LatentSpace_v38	Infralimbic area	paraterminal gyrus	0.8157541529111813	Supramodal
LatentSpace_v38	Retrosplenial area	lingual gyrus	0.7251626321312115	Supramodal
LatentSpace_v38	Prelimbic area	dentate gyrus	0.8638629121027032	Supramodal
LatentSpace_v38	Primary auditory area	planum temporale	0.8929089352899734	Sensorimotor
LatentSpace_v38	Dorsal auditory area	planum temporale	0.9293418432663383	Sensorimotor
LatentSpace_v38	Ventral auditory area	lateral orbital gyrus	0.8687239645242812	Sensorimotor
LatentSpace_v38	Agranular insular area	claustrum	0.8653014459540787	Supramodal
LatentSpace_v38	Ectorhinal area	temporal pole	0.9056330809057205	Supramodal
LatentSpace_v38	Primary motor area	middle frontal gyrus	0.9498371204730026	Sensorimotor
LatentSpace_v38	Secondary motor area	anterior orbital gyrus	0.9028720659903452	Sensorimotor
LatentSpace_v38	Frontal pole, cerebral cortex	claustrum	0.7478565219342037	Supramodal
LatentSpace_v38	Orbital area	temporal pole	0.8677970053774061	Supramodal
LatentSpace_v38	Posterior parietal association areas	planum temporale	0.8339793489782675	Supramodal
LatentSpace_v38	Perirhinal area	parahippocampal gyrus	0.8860073985497489	Supramodal
LatentSpace_v38	Primary somatosensory area	Heschl's gyrus	0.9766290111621885	Sensorimotor
LatentSpace_v38	Supplemental somatosensory area	lateral orbital gyrus	0.865920486066373	Sensorimotor
LatentSpace_v38	Temporal association areas	insula	0.869353600711198	Supramodal
LatentSpace_v38	Visual areas	planum temporale	0.8685312829870747	Sensorimotor
LatentSpace_v39	Anterior cingulate area	superior frontal gyrus	0.9309494048179345	Supramodal
LatentSpace_v39	Infralimbic area	dentate gyrus	0.8583390549327085	Supramodal
LatentSpace_v39	Retrosplenial area	superior occipital gyrus	0.7758061307254104	Supramodal
LatentSpace_v39	Prelimbic area	gyrus rectus	0.8795059323500586	Supramodal
LatentSpace_v39	Primary auditory area	planum temporale	0.8622566562854602	Sensorimotor
LatentSpace_v39	Dorsal auditory area	planum temporale	0.9023385327717766	Sensorimotor
LatentSpace_v39	Ventral auditory area	inferior temporal gyrus	0.8211159724539424	Sensorimotor
LatentSpace_v39	Agranular insular area	claustrum	0.8985381132839674	Supramodal
LatentSpace_v39	Ectorhinal area	temporal pole	0.8952555356269156	Supramodal
LatentSpace_v39	Primary motor area	paracentral lobule, anterior part	0.9585734825147082	Sensorimotor
LatentSpace_v39	Secondary motor area	superior frontal gyrus	0.9276127871801971	Sensorimotor
LatentSpace_v39	Frontal pole, cerebral cortex	posterior orbital gyrus	0.7718513433775769	Supramodal
LatentSpace_v39	Orbital area	parolfactory gyri	0.9015052908903096	Supramodal
LatentSpace_v39	Posterior parietal association areas	planum temporale	0.8681578211735075	Supramodal
LatentSpace_v39	Perirhinal area	parahippocampal gyrus	0.8586458496550892	Supramodal
LatentSpace_v39	Primary somatosensory area	transverse gyri	0.9366129765407595	Sensorimotor
LatentSpace_v39	Supplemental somatosensory area	transverse gyri	0.7856215609677077	Sensorimotor
LatentSpace_v39	Temporal association areas	insula	0.8556890453227547	Supramodal
LatentSpace_v39	Visual areas	planum temporale	0.8923615742070505	Sensorimotor
LatentSpace_v40	Anterior cingulate area	middle frontal gyrus	0.9222296062174247	Supramodal
LatentSpace_v40	Infralimbic area	dentate gyrus	0.8039506384862691	Supramodal
LatentSpace_v40	Retrosplenial area	planum temporale	0.7338680519014991	Supramodal
LatentSpace_v40	Prelimbic area	superior rostral gyrus	0.8385259170100157	Supramodal
LatentSpace_v40	Primary auditory area	lateral orbital gyrus	0.8443217543676209	Sensorimotor
LatentSpace_v40	Dorsal auditory area	transverse gyri	0.8950819546464127	Sensorimotor
LatentSpace_v40	Ventral auditory area	lateral orbital gyrus	0.7916018781236184	Sensorimotor
LatentSpace_v40	Agranular insular area	claustrum	0.8731769230923964	Supramodal
LatentSpace_v40	Ectorhinal area	claustrum	0.8941095416435414	Supramodal
LatentSpace_v40	Primary motor area	paracentral lobule, anterior part	0.9624153946514287	Sensorimotor
LatentSpace_v40	Secondary motor area	middle frontal gyrus	0.9336532743914693	Sensorimotor
LatentSpace_v40	Frontal pole, cerebral cortex	anterior orbital gyrus	0.8005503905504411	Supramodal
LatentSpace_v40	Orbital area	gyrus rectus	0.898619868943412	Supramodal
LatentSpace_v40	Posterior parietal association areas	planum temporale	0.8460862269765216	Supramodal
LatentSpace_v40	Perirhinal area	parahippocampal gyrus	0.859593708319638	Supramodal
LatentSpace_v40	Primary somatosensory area	occipital pole	0.9390481064276005	Sensorimotor
LatentSpace_v40	Supplemental somatosensory area	transverse gyri	0.7699777478982828	Sensorimotor
LatentSpace_v40	Temporal association areas	insula	0.8091714252565291	Supramodal
LatentSpace_v40	Visual areas	transverse gyri	0.8347972627890854	Sensorimotor
LatentSpace_v41	Anterior cingulate area	superior frontal gyrus	0.941916208297936	Supramodal
LatentSpace_v41	Infralimbic area	paraterminal gyrus	0.8090012903961022	Supramodal
LatentSpace_v41	Retrosplenial area	superior parietal lobule	0.7744983159072976	Supramodal
LatentSpace_v41	Prelimbic area	parolfactory gyri	0.908509262762781	Supramodal
LatentSpace_v41	Primary auditory area	planum temporale	0.8336192103470689	Sensorimotor
LatentSpace_v41	Dorsal auditory area	occipital pole	0.8972157516857256	Sensorimotor
LatentSpace_v41	Ventral auditory area	planum temporale	0.7934893109010509	Sensorimotor
LatentSpace_v41	Agranular insular area	temporal pole	0.8813861948815123	Supramodal
LatentSpace_v41	Ectorhinal area	temporal pole	0.9132021655243514	Supramodal
LatentSpace_v41	Primary motor area	paracentral lobule, anterior part	0.9473313703925087	Sensorimotor
LatentSpace_v41	Secondary motor area	superior frontal gyrus	0.9329525603201576	Sensorimotor
LatentSpace_v41	Frontal pole, cerebral cortex	posterior orbital gyrus	0.8207245886013643	Supramodal
LatentSpace_v41	Orbital area	claustrum	0.9108988069673581	Supramodal
LatentSpace_v41	Posterior parietal association areas	planum temporale	0.8550260495381233	Supramodal
LatentSpace_v41	Perirhinal area	parahippocampal gyrus	0.8543376270328066	Supramodal
LatentSpace_v41	Primary somatosensory area	transverse gyri	0.9593751600661528	Sensorimotor
LatentSpace_v41	Supplemental somatosensory area	Heschl's gyrus	0.8518485987935527	Sensorimotor
LatentSpace_v41	Temporal association areas	lateral orbital gyrus	0.808736859478876	Supramodal
LatentSpace_v41	Visual areas	lingual gyrus	0.8449301688861998	Sensorimotor
LatentSpace_v42	Anterior cingulate area	superior frontal gyrus	0.9379017482163982	Supramodal
LatentSpace_v42	Infralimbic area	CA1 field	0.8023158158290798	Supramodal
LatentSpace_v42	Retrosplenial area	superior parietal lobule	0.7954279955651645	Supramodal
LatentSpace_v42	Prelimbic area	posterior orbital gyrus	0.8391446779589745	Supramodal
LatentSpace_v42	Primary auditory area	planum temporale	0.855973095764191	Sensorimotor
LatentSpace_v42	Dorsal auditory area	transverse gyri	0.8998071128910302	Sensorimotor
LatentSpace_v42	Ventral auditory area	lateral orbital gyrus	0.7950529941914194	Sensorimotor
LatentSpace_v42	Agranular insular area	claustrum	0.8103452329423821	Supramodal
LatentSpace_v42	Ectorhinal area	insula	0.9055815504063863	Supramodal
LatentSpace_v42	Primary motor area	paracentral lobule, anterior part	0.9426377628018269	Sensorimotor
LatentSpace_v42	Secondary motor area	paracentral lobule, anterior part	0.9134846300736672	Sensorimotor
LatentSpace_v42	Frontal pole, cerebral cortex	posterior orbital gyrus	0.7498735596423403	Supramodal
LatentSpace_v42	Orbital area	claustrum	0.8637620354856418	Supramodal
LatentSpace_v42	Posterior parietal association areas	planum temporale	0.8848713153257075	Supramodal
LatentSpace_v42	Perirhinal area	parahippocampal gyrus	0.8554236795938153	Supramodal
LatentSpace_v42	Primary somatosensory area	occipital pole	0.941468110651261	Sensorimotor
LatentSpace_v42	Supplemental somatosensory area	Heschl's gyrus	0.7997840993819142	Sensorimotor
LatentSpace_v42	Temporal association areas	insula	0.8363386691395636	Supramodal
LatentSpace_v42	Visual areas	transverse gyri	0.8765766891099719	Sensorimotor
LatentSpace_v43	Anterior cingulate area	cingulate gyrus	0.8890831131012804	Supramodal
LatentSpace_v43	Infralimbic area	subiculum	0.9177870647381828	Supramodal
LatentSpace_v43	Retrosplenial area	superior occipital gyrus	0.7395925399120169	Supramodal
LatentSpace_v43	Prelimbic area	parahippocampal gyrus	0.8809729620821926	Supramodal
LatentSpace_v43	Primary auditory area	planum temporale	0.8763419510496461	Sensorimotor
LatentSpace_v43	Dorsal auditory area	transverse gyri	0.9156261088975186	Sensorimotor
LatentSpace_v43	Ventral auditory area	middle temporal gyrus	0.8279720765222919	Sensorimotor
LatentSpace_v43	Agranular insular area	claustrum	0.8927988296947524	Supramodal
LatentSpace_v43	Ectorhinal area	claustrum	0.9130460567167187	Supramodal
LatentSpace_v43	Primary motor area	paracentral lobule, anterior part	0.9679636246023301	Sensorimotor
LatentSpace_v43	Secondary motor area	middle frontal gyrus	0.9464083752653983	Sensorimotor
LatentSpace_v43	Frontal pole, cerebral cortex	frontal pole	0.7934101430461852	Supramodal
LatentSpace_v43	Orbital area	parolfactory gyri	0.8944688066478848	Supramodal
LatentSpace_v43	Posterior parietal association areas	planum temporale	0.8966096271116971	Supramodal
LatentSpace_v43	Perirhinal area	parahippocampal gyrus	0.8424606590191208	Supramodal
LatentSpace_v43	Primary somatosensory area	occipital pole	0.9667120780027809	Sensorimotor
LatentSpace_v43	Supplemental somatosensory area	inferior frontal gyrus	0.842872649510134	Sensorimotor
LatentSpace_v43	Temporal association areas	insula	0.8458163465438382	Supramodal
LatentSpace_v43	Visual areas	planum temporale	0.9067198412239886	Sensorimotor
LatentSpace_v44	Anterior cingulate area	superior frontal gyrus	0.8921182119745922	Supramodal
LatentSpace_v44	Infralimbic area	subiculum	0.8780252225978389	Supramodal
LatentSpace_v44	Retrosplenial area	planum temporale	0.678631429084859	Supramodal
LatentSpace_v44	Prelimbic area	gyrus rectus	0.8787724946400114	Supramodal
LatentSpace_v44	Primary auditory area	planum temporale	0.8714098030554153	Sensorimotor
LatentSpace_v44	Dorsal auditory area	transverse gyri	0.9022247064369185	Sensorimotor
LatentSpace_v44	Ventral auditory area	middle temporal gyrus	0.8353125675367827	Sensorimotor
LatentSpace_v44	Agranular insular area	gyrus rectus	0.8324191677487265	Supramodal
LatentSpace_v44	Ectorhinal area	claustrum	0.9166670701249481	Supramodal
LatentSpace_v44	Primary motor area	paracentral lobule, anterior part	0.9702281769331598	Sensorimotor
LatentSpace_v44	Secondary motor area	middle frontal gyrus	0.9393448789140189	Sensorimotor
LatentSpace_v44	Frontal pole, cerebral cortex	cingulate gyrus	0.7920328084613891	Supramodal
LatentSpace_v44	Orbital area	temporal pole	0.867694230942795	Supramodal
LatentSpace_v44	Posterior parietal association areas	planum temporale	0.8378746040776035	Supramodal
LatentSpace_v44	Perirhinal area	parahippocampal gyrus	0.8553807789871057	Supramodal
LatentSpace_v44	Primary somatosensory area	occipital pole	0.9754040772032069	Sensorimotor
LatentSpace_v44	Supplemental somatosensory area	Heschl's gyrus	0.8307322047653951	Sensorimotor
LatentSpace_v44	Temporal association areas	insula	0.8424013082967321	Supramodal
LatentSpace_v44	Visual areas	planum temporale	0.8545614047763751	Sensorimotor
LatentSpace_v45	Anterior cingulate area	cingulate gyrus	0.930968902399833	Supramodal
LatentSpace_v45	Infralimbic area	subiculum	0.8463207386215373	Supramodal
LatentSpace_v45	Retrosplenial area	planum temporale	0.6977678709061679	Supramodal
LatentSpace_v45	Prelimbic area	parolfactory gyri	0.8670103756018452	Supramodal
LatentSpace_v45	Primary auditory area	frontal pole	0.8052872538510463	Sensorimotor
LatentSpace_v45	Dorsal auditory area	transverse gyri	0.8713967084093939	Sensorimotor
LatentSpace_v45	Ventral auditory area	frontal pole	0.7629732885687904	Sensorimotor
LatentSpace_v45	Agranular insular area	claustrum	0.8209682818802863	Supramodal
LatentSpace_v45	Ectorhinal area	claustrum	0.8758123619100715	Supramodal
LatentSpace_v45	Primary motor area	paracentral lobule, anterior part	0.9493386644973025	Sensorimotor
LatentSpace_v45	Secondary motor area	superior frontal gyrus	0.9437392557843947	Sensorimotor
LatentSpace_v45	Frontal pole, cerebral cortex	posterior orbital gyrus	0.7612936295634213	Supramodal
LatentSpace_v45	Orbital area	claustrum	0.8941837009236283	Supramodal
LatentSpace_v45	Posterior parietal association areas	planum temporale	0.8381857850027921	Supramodal
LatentSpace_v45	Perirhinal area	claustrum	0.8168014986735229	Supramodal
LatentSpace_v45	Primary somatosensory area	transverse gyri	0.951973985934027	Sensorimotor
LatentSpace_v45	Supplemental somatosensory area	transverse gyri	0.8026254653201262	Sensorimotor
LatentSpace_v45	Temporal association areas	insula	0.7423742628625635	Supramodal
LatentSpace_v45	Visual areas	lingual gyrus	0.8454546243320838	Sensorimotor
LatentSpace_v46	Anterior cingulate area	superior frontal gyrus	0.8659812293775956	Supramodal
LatentSpace_v46	Infralimbic area	paraterminal gyrus	0.8517349924608731	Supramodal
LatentSpace_v46	Retrosplenial area	cuneus	0.7999666666365151	Supramodal
LatentSpace_v46	Prelimbic area	gyrus rectus	0.8323011214642397	Supramodal
LatentSpace_v46	Primary auditory area	frontal pole	0.8572323991021307	Sensorimotor
LatentSpace_v46	Dorsal auditory area	frontal pole	0.8950332035033824	Sensorimotor
LatentSpace_v46	Ventral auditory area	lateral orbital gyrus	0.7881920884137875	Sensorimotor
LatentSpace_v46	Agranular insular area	claustrum	0.8223594707895038	Supramodal
LatentSpace_v46	Ectorhinal area	claustrum	0.9576908915299369	Supramodal
LatentSpace_v46	Primary motor area	paracentral lobule, anterior part	0.9031130378046818	Sensorimotor
LatentSpace_v46	Secondary motor area	superior frontal gyrus	0.8740780440920475	Sensorimotor
LatentSpace_v46	Frontal pole, cerebral cortex	posterior orbital gyrus	0.745601587957146	Supramodal
LatentSpace_v46	Orbital area	gyrus rectus	0.8477835577987813	Supramodal
LatentSpace_v46	Posterior parietal association areas	planum temporale	0.8851656603445058	Supramodal
LatentSpace_v46	Perirhinal area	claustrum	0.8614026659572992	Supramodal
LatentSpace_v46	Primary somatosensory area	transverse gyri	0.9214998905357413	Sensorimotor
LatentSpace_v46	Supplemental somatosensory area	planum polare	0.8004071630704395	Sensorimotor
LatentSpace_v46	Temporal association areas	inferior rostral gyrus	0.8619613561450371	Supramodal
LatentSpace_v46	Visual areas	planum temporale	0.8866631056292539	Sensorimotor
LatentSpace_v47	Anterior cingulate area	middle frontal gyrus	0.9115122963171666	Supramodal
LatentSpace_v47	Infralimbic area	CA3 field	0.8614624629631135	Supramodal
LatentSpace_v47	Retrosplenial area	paracentral lobule, posterior part	0.8174882020790534	Supramodal
LatentSpace_v47	Prelimbic area	inferior rostral gyrus	0.9169576198850135	Supramodal
LatentSpace_v47	Primary auditory area	lateral orbital gyrus	0.9103688021342984	Sensorimotor
LatentSpace_v47	Dorsal auditory area	planum temporale	0.9309903594920225	Sensorimotor
LatentSpace_v47	Ventral auditory area	planum polare	0.857878583170165	Sensorimotor
LatentSpace_v47	Agranular insular area	claustrum	0.8987037474562142	Supramodal
LatentSpace_v47	Ectorhinal area	claustrum	0.9328857532865342	Supramodal
LatentSpace_v47	Primary motor area	paracentral lobule, anterior part	0.9387279200785652	Sensorimotor
LatentSpace_v47	Secondary motor area	middle frontal gyrus	0.9447595345036454	Sensorimotor
LatentSpace_v47	Frontal pole, cerebral cortex	frontal operculum	0.8196821861970289	Supramodal
LatentSpace_v47	Orbital area	parolfactory gyri	0.9100246524568885	Supramodal
LatentSpace_v47	Posterior parietal association areas	paracentral lobule, posterior part	0.9213936935741135	Supramodal
LatentSpace_v47	Perirhinal area	parahippocampal gyrus	0.8871452481723409	Supramodal
LatentSpace_v47	Primary somatosensory area	transverse gyri	0.9251726570724134	Sensorimotor
LatentSpace_v47	Supplemental somatosensory area	middle temporal gyrus	0.7789612396035746	Sensorimotor
LatentSpace_v47	Temporal association areas	insula	0.8916004799734117	Supramodal
LatentSpace_v47	Visual areas	planum temporale	0.9424868666541772	Sensorimotor
LatentSpace_v48	Anterior cingulate area	superior frontal gyrus	0.9257678762466259	Supramodal
LatentSpace_v48	Infralimbic area	subiculum	0.8186749360378007	Supramodal
LatentSpace_v48	Retrosplenial area	planum temporale	0.8161686696398065	Supramodal
LatentSpace_v48	Prelimbic area	gyrus rectus	0.8526883071028454	Supramodal
LatentSpace_v48	Primary auditory area	frontal pole	0.8540603065781255	Sensorimotor
LatentSpace_v48	Dorsal auditory area	transverse gyri	0.8696555828071776	Sensorimotor
LatentSpace_v48	Ventral auditory area	frontal pole	0.7827061222941565	Sensorimotor
LatentSpace_v48	Agranular insular area	claustrum	0.8510838814571847	Supramodal
LatentSpace_v48	Ectorhinal area	claustrum	0.8729807164124579	Supramodal
LatentSpace_v48	Primary motor area	transverse gyri	0.9298506612980866	Sensorimotor
LatentSpace_v48	Secondary motor area	superior temporal gyrus	0.9149913793525309	Sensorimotor
LatentSpace_v48	Frontal pole, cerebral cortex	posterior orbital gyrus	0.7653304653954556	Supramodal
LatentSpace_v48	Orbital area	temporal pole	0.8264011083919803	Supramodal
LatentSpace_v48	Posterior parietal association areas	planum temporale	0.9218478553552746	Supramodal
LatentSpace_v48	Perirhinal area	parahippocampal gyrus	0.8705052777814004	Supramodal
LatentSpace_v48	Primary somatosensory area	occipital pole	0.9128052324258259	Sensorimotor
LatentSpace_v48	Supplemental somatosensory area	transverse gyri	0.7148968095192804	Sensorimotor
LatentSpace_v48	Temporal association areas	insula	0.8202382960368095	Supramodal
LatentSpace_v48	Visual areas	transverse gyri	0.8945617527490778	Sensorimotor
LatentSpace_v49	Anterior cingulate area	cingulate gyrus	0.87959963939228	Supramodal
LatentSpace_v49	Infralimbic area	subiculum	0.8307159391948985	Supramodal
LatentSpace_v49	Retrosplenial area	planum temporale	0.7555858633508776	Supramodal
LatentSpace_v49	Prelimbic area	superior rostral gyrus	0.8840740752256357	Supramodal
LatentSpace_v49	Primary auditory area	lateral orbital gyrus	0.9251425572978249	Sensorimotor
LatentSpace_v49	Dorsal auditory area	planum temporale	0.9524492377740466	Sensorimotor
LatentSpace_v49	Ventral auditory area	lateral orbital gyrus	0.8954857222820167	Sensorimotor
LatentSpace_v49	Agranular insular area	claustrum	0.8919427251235301	Supramodal
LatentSpace_v49	Ectorhinal area	claustrum	0.9385125570320909	Supramodal
LatentSpace_v49	Primary motor area	paracentral lobule, anterior part	0.977543652154046	Sensorimotor
LatentSpace_v49	Secondary motor area	superior frontal gyrus	0.9563168923259096	Sensorimotor
LatentSpace_v49	Frontal pole, cerebral cortex	superior rostral gyrus	0.8270139741240231	Supramodal
LatentSpace_v49	Orbital area	parolfactory gyri	0.9112548581755913	Supramodal
LatentSpace_v49	Posterior parietal association areas	planum temporale	0.8970421374816616	Supramodal
LatentSpace_v49	Perirhinal area	claustrum	0.8511280112920226	Supramodal
LatentSpace_v49	Primary somatosensory area	occipital pole	0.9767936409625618	Sensorimotor
LatentSpace_v49	Supplemental somatosensory area	inferior frontal gyrus	0.8786126103650859	Sensorimotor
LatentSpace_v49	Temporal association areas	insula	0.8955713498466013	Supramodal
LatentSpace_v49	Visual areas	planum temporale	0.9259655247023953	Sensorimotor
LatentSpace_v50	Anterior cingulate area	superior frontal gyrus	0.9019275177833666	Supramodal
LatentSpace_v50	Infralimbic area	paraterminal gyrus	0.8740576619088641	Supramodal
LatentSpace_v50	Retrosplenial area	superior parietal lobule	0.7750966936761677	Supramodal
LatentSpace_v50	Prelimbic area	gyrus rectus	0.8284377757581831	Supramodal
LatentSpace_v50	Primary auditory area	frontal pole	0.9064074763608724	Sensorimotor
LatentSpace_v50	Dorsal auditory area	transverse gyri	0.9287820657224132	Sensorimotor
LatentSpace_v50	Ventral auditory area	lateral orbital gyrus	0.8942706934374739	Sensorimotor
LatentSpace_v50	Agranular insular area	claustrum	0.8738052022657256	Supramodal
LatentSpace_v50	Ectorhinal area	temporal pole	0.9251295744321115	Supramodal
LatentSpace_v50	Primary motor area	paracentral lobule, anterior part	0.9521536264577026	Sensorimotor
LatentSpace_v50	Secondary motor area	middle frontal gyrus	0.9099524381645718	Sensorimotor
LatentSpace_v50	Frontal pole, cerebral cortex	frontal pole	0.7533140538400059	Supramodal
LatentSpace_v50	Orbital area	claustrum	0.872985422822108	Supramodal
LatentSpace_v50	Posterior parietal association areas	planum temporale	0.8673544784013174	Supramodal
LatentSpace_v50	Perirhinal area	parahippocampal gyrus	0.8725802630955287	Supramodal
LatentSpace_v50	Primary somatosensory area	transverse gyri	0.9587702834309947	Sensorimotor
LatentSpace_v50	Supplemental somatosensory area	inferior frontal gyrus	0.8837176941570033	Sensorimotor
LatentSpace_v50	Temporal association areas	gyrus rectus	0.8927339166243483	Supramodal
LatentSpace_v50	Visual areas	transverse gyri	0.862166224437273	Sensorimotor
LatentSpace_v51	Anterior cingulate area	middle frontal gyrus	0.9132176459715591	Supramodal
LatentSpace_v51	Infralimbic area	subiculum	0.8565376736942341	Supramodal
LatentSpace_v51	Retrosplenial area	paracentral lobule, posterior part	0.7780044279972854	Supramodal
LatentSpace_v51	Prelimbic area	cingulate gyrus	0.8448849349958543	Supramodal
LatentSpace_v51	Primary auditory area	planum temporale	0.9316562831474168	Sensorimotor
LatentSpace_v51	Dorsal auditory area	planum temporale	0.9537886779550031	Sensorimotor
LatentSpace_v51	Ventral auditory area	lateral orbital gyrus	0.8838571904571758	Sensorimotor
LatentSpace_v51	Agranular insular area	claustrum	0.8986736189639416	Supramodal
LatentSpace_v51	Ectorhinal area	insula	0.9244281966449431	Supramodal
LatentSpace_v51	Primary motor area	paracentral lobule, anterior part	0.9456251392837196	Sensorimotor
LatentSpace_v51	Secondary motor area	middle frontal gyrus	0.916977744921027	Sensorimotor
LatentSpace_v51	Frontal pole, cerebral cortex	superior frontal gyrus	0.7860044324130819	Supramodal
LatentSpace_v51	Orbital area	claustrum	0.9251926425367621	Supramodal
LatentSpace_v51	Posterior parietal association areas	planum temporale	0.8956144131837346	Supramodal
LatentSpace_v51	Perirhinal area	parahippocampal gyrus	0.8517119476361718	Supramodal
LatentSpace_v51	Primary somatosensory area	occipital pole	0.9619620060865967	Sensorimotor
LatentSpace_v51	Supplemental somatosensory area	Heschl's gyrus	0.8513574214392383	Sensorimotor
LatentSpace_v51	Temporal association areas	lateral orbital gyrus	0.864283533907853	Supramodal
LatentSpace_v51	Visual areas	planum temporale	0.9092458622269091	Sensorimotor
LatentSpace_v52	Anterior cingulate area	superior frontal gyrus	0.8783614827277184	Supramodal
LatentSpace_v52	Infralimbic area	paraterminal gyrus	0.8466727000194233	Supramodal
LatentSpace_v52	Retrosplenial area	paracentral lobule, posterior part	0.8087614537137511	Supramodal
LatentSpace_v52	Prelimbic area	gyrus rectus	0.8535704337444555	Supramodal
LatentSpace_v52	Primary auditory area	planum temporale	0.8261851877291931	Sensorimotor
LatentSpace_v52	Dorsal auditory area	planum temporale	0.8907946361852574	Sensorimotor
LatentSpace_v52	Ventral auditory area	lateral orbital gyrus	0.7515669304712701	Sensorimotor
LatentSpace_v52	Agranular insular area	claustrum	0.8829286973312372	Supramodal
LatentSpace_v52	Ectorhinal area	claustrum	0.8530006768701628	Supramodal
LatentSpace_v52	Primary motor area	paracentral lobule, anterior part	0.9336248820985215	Sensorimotor
LatentSpace_v52	Secondary motor area	superior frontal gyrus	0.904838900208733	Sensorimotor
LatentSpace_v52	Frontal pole, cerebral cortex	posterior orbital gyrus	0.7648906637709841	Supramodal
LatentSpace_v52	Orbital area	gyrus rectus	0.8720719997755807	Supramodal
LatentSpace_v52	Posterior parietal association areas	planum temporale	0.910245260377182	Supramodal
LatentSpace_v52	Perirhinal area	parahippocampal gyrus	0.7766935911325872	Supramodal
LatentSpace_v52	Primary somatosensory area	inferior occipital gyrus	0.9506275650735019	Sensorimotor
LatentSpace_v52	Supplemental somatosensory area	occipito-temporal gyrus	0.7664656855065614	Sensorimotor
LatentSpace_v52	Temporal association areas	insula	0.7945686501574274	Supramodal
LatentSpace_v52	Visual areas	planum temporale	0.9073858641876659	Sensorimotor
LatentSpace_v53	Anterior cingulate area	cingulate gyrus	0.8441555453965296	Supramodal
LatentSpace_v53	Infralimbic area	subiculum	0.8693539494907365	Supramodal
LatentSpace_v53	Retrosplenial area	planum temporale	0.65468374735366	Supramodal
LatentSpace_v53	Prelimbic area	parolfactory gyri	0.8316093693827579	Supramodal
LatentSpace_v53	Primary auditory area	planum temporale	0.8673819556177101	Sensorimotor
LatentSpace_v53	Dorsal auditory area	occipital pole	0.9052410848712529	Sensorimotor
LatentSpace_v53	Ventral auditory area	planum temporale	0.8298116628546314	Sensorimotor
LatentSpace_v53	Agranular insular area	claustrum	0.8604796037038573	Supramodal
LatentSpace_v53	Ectorhinal area	claustrum	0.9284859786389923	Supramodal
LatentSpace_v53	Primary motor area	paracentral lobule, anterior part	0.9510253356677918	Sensorimotor
LatentSpace_v53	Secondary motor area	superior frontal gyrus	0.8889696249626018	Sensorimotor
LatentSpace_v53	Frontal pole, cerebral cortex	posterior orbital gyrus	0.7022926970414962	Supramodal
LatentSpace_v53	Orbital area	temporal pole	0.8758701189208894	Supramodal
LatentSpace_v53	Posterior parietal association areas	planum temporale	0.8717232291109231	Supramodal
LatentSpace_v53	Perirhinal area	parahippocampal gyrus	0.8096811531237659	Supramodal
LatentSpace_v53	Primary somatosensory area	postcentral gyrus	0.9572526105890496	Sensorimotor
LatentSpace_v53	Supplemental somatosensory area	Heschl's gyrus	0.8243854185821261	Sensorimotor
LatentSpace_v53	Temporal association areas	frontal pole	0.801580627695796	Supramodal
LatentSpace_v53	Visual areas	planum temporale	0.8749042956033937	Sensorimotor
LatentSpace_v54	Anterior cingulate area	superior frontal gyrus	0.919613960517002	Supramodal
LatentSpace_v54	Infralimbic area	CA2 field	0.82624614378518	Supramodal
LatentSpace_v54	Retrosplenial area	paracentral lobule, posterior part	0.7330019505312377	Supramodal
LatentSpace_v54	Prelimbic area	gyrus rectus	0.852566599276202	Supramodal
LatentSpace_v54	Primary auditory area	frontal pole	0.89292010428899	Sensorimotor
LatentSpace_v54	Dorsal auditory area	planum temporale	0.9263561754524118	Sensorimotor
LatentSpace_v54	Ventral auditory area	lateral orbital gyrus	0.8837165680828467	Sensorimotor
LatentSpace_v54	Agranular insular area	claustrum	0.9267436821642403	Supramodal
LatentSpace_v54	Ectorhinal area	claustrum	0.9367516616108738	Supramodal
LatentSpace_v54	Primary motor area	paracentral lobule, anterior part	0.9492580394495855	Sensorimotor
LatentSpace_v54	Secondary motor area	superior frontal gyrus	0.8996865709826736	Sensorimotor
LatentSpace_v54	Frontal pole, cerebral cortex	posterior orbital gyrus	0.8016827371512378	Supramodal
LatentSpace_v54	Orbital area	claustrum	0.9113501603826841	Supramodal
LatentSpace_v54	Posterior parietal association areas	planum temporale	0.8525312737496565	Supramodal
LatentSpace_v54	Perirhinal area	parahippocampal gyrus	0.9076852734076509	Supramodal
LatentSpace_v54	Primary somatosensory area	transverse gyri	0.9475944598444332	Sensorimotor
LatentSpace_v54	Supplemental somatosensory area	middle temporal gyrus	0.840908102144189	Sensorimotor
LatentSpace_v54	Temporal association areas	insula	0.9027408111643479	Supramodal
LatentSpace_v54	Visual areas	planum temporale	0.8781130586876326	Sensorimotor
LatentSpace_v55	Anterior cingulate area	superior frontal gyrus	0.941055939456102	Supramodal
LatentSpace_v55	Infralimbic area	paraterminal gyrus	0.8738179458683116	Supramodal
LatentSpace_v55	Retrosplenial area	paracentral lobule, posterior part	0.8015419250724071	Supramodal
LatentSpace_v55	Prelimbic area	gyrus rectus	0.9094832872989479	Supramodal
LatentSpace_v55	Primary auditory area	planum temporale	0.880592876835688	Sensorimotor
LatentSpace_v55	Dorsal auditory area	planum temporale	0.9173372861966241	Sensorimotor
LatentSpace_v55	Ventral auditory area	planum temporale	0.8540015662052414	Sensorimotor
LatentSpace_v55	Agranular insular area	claustrum	0.8900665826266131	Supramodal
LatentSpace_v55	Ectorhinal area	claustrum	0.9006630135230643	Supramodal
LatentSpace_v55	Primary motor area	paracentral lobule, anterior part	0.9495702016407949	Sensorimotor
LatentSpace_v55	Secondary motor area	frontal pole	0.9280283526523438	Sensorimotor
LatentSpace_v55	Frontal pole, cerebral cortex	claustrum	0.7843886908262322	Supramodal
LatentSpace_v55	Orbital area	claustrum	0.8926967820230539	Supramodal
LatentSpace_v55	Posterior parietal association areas	planum temporale	0.8702630593287849	Supramodal
LatentSpace_v55	Perirhinal area	claustrum	0.81166511909214	Supramodal
LatentSpace_v55	Primary somatosensory area	occipital pole	0.9684109047965186	Sensorimotor
LatentSpace_v55	Supplemental somatosensory area	Heschl's gyrus	0.8684655051440138	Sensorimotor
LatentSpace_v55	Temporal association areas	frontal pole	0.8396012075877787	Supramodal
LatentSpace_v55	Visual areas	planum temporale	0.8549308121452641	Sensorimotor
LatentSpace_v56	Anterior cingulate area	superior frontal gyrus	0.9329805029929231	Supramodal
LatentSpace_v56	Infralimbic area	subiculum	0.8298918629733828	Supramodal
LatentSpace_v56	Retrosplenial area	superior parietal lobule	0.7977571065305897	Supramodal
LatentSpace_v56	Prelimbic area	gyrus rectus	0.863668726171653	Supramodal
LatentSpace_v56	Primary auditory area	frontal pole	0.8530273396876217	Sensorimotor
LatentSpace_v56	Dorsal auditory area	transverse gyri	0.8902028238112366	Sensorimotor
LatentSpace_v56	Ventral auditory area	frontal pole	0.8166947006098033	Sensorimotor
LatentSpace_v56	Agranular insular area	claustrum	0.8548012098086729	Supramodal
LatentSpace_v56	Ectorhinal area	temporal pole	0.9061020199453816	Supramodal
LatentSpace_v56	Primary motor area	paracentral lobule, anterior part	0.9469523119706463	Sensorimotor
LatentSpace_v56	Secondary motor area	superior frontal gyrus	0.9204416221575371	Sensorimotor
LatentSpace_v56	Frontal pole, cerebral cortex	posterior orbital gyrus	0.7549648702147165	Supramodal
LatentSpace_v56	Orbital area	claustrum	0.8742295210640335	Supramodal
LatentSpace_v56	Posterior parietal association areas	planum temporale	0.8534251845157468	Supramodal
LatentSpace_v56	Perirhinal area	parahippocampal gyrus	0.8725952860044608	Supramodal
LatentSpace_v56	Primary somatosensory area	occipital pole	0.9342810740768325	Sensorimotor
LatentSpace_v56	Supplemental somatosensory area	inferior frontal gyrus	0.7823099182872993	Sensorimotor
LatentSpace_v56	Temporal association areas	insula	0.8427693768193827	Supramodal
LatentSpace_v56	Visual areas	transverse gyri	0.8530814522327711	Sensorimotor
LatentSpace_v57	Anterior cingulate area	middle frontal gyrus	0.8963560882888095	Supramodal
LatentSpace_v57	Infralimbic area	paraterminal gyrus	0.8736733794352265	Supramodal
LatentSpace_v57	Retrosplenial area	planum temporale	0.7861336751507277	Supramodal
LatentSpace_v57	Prelimbic area	gyrus rectus	0.8301817901792985	Supramodal
LatentSpace_v57	Primary auditory area	inferior parietal lobule	0.8908438383872496	Sensorimotor
LatentSpace_v57	Dorsal auditory area	planum temporale	0.926187564867619	Sensorimotor
LatentSpace_v57	Ventral auditory area	inferior temporal gyrus	0.8579921189476486	Sensorimotor
LatentSpace_v57	Agranular insular area	claustrum	0.8162013531465737	Supramodal
LatentSpace_v57	Ectorhinal area	temporal pole	0.9028248306238339	Supramodal
LatentSpace_v57	Primary motor area	paracentral lobule, anterior part	0.9762335816140026	Sensorimotor
LatentSpace_v57	Secondary motor area	middle frontal gyrus	0.9283620221207362	Sensorimotor
LatentSpace_v57	Frontal pole, cerebral cortex	posterior orbital gyrus	0.7997504203594613	Supramodal
LatentSpace_v57	Orbital area	gyrus rectus	0.8759512348229114	Supramodal
LatentSpace_v57	Posterior parietal association areas	planum temporale	0.9140019678422797	Supramodal
LatentSpace_v57	Perirhinal area	parahippocampal gyrus	0.8628687592119817	Supramodal
LatentSpace_v57	Primary somatosensory area	occipital pole	0.9721215735011153	Sensorimotor
LatentSpace_v57	Supplemental somatosensory area	inferior parietal lobule	0.8327092500512212	Sensorimotor
LatentSpace_v57	Temporal association areas	insula	0.8809797246889652	Supramodal
LatentSpace_v57	Visual areas	planum temporale	0.91233998995318355	Sensorimotor
LatentSpace_v58	Anterior cingulate area	cingulate gyrus	0.8820864072066437	Supramodal
LatentSpace_v58	Infralimbic area	subiculum	0.863014480927392	Supramodal
LatentSpace_v58	Retrosplenial area	planum temporale	0.7753323062497041	Supramodal
LatentSpace_v58	Prelimbic area	parolfactory gyri	0.8280975270073503	Supramodal
LatentSpace_v58	Primary auditory area	lateral orbital gyrus	0.843074713058352	Sensorimotor
LatentSpace_v58	Dorsal auditory area	planum temporale	0.8761621803017173	Sensorimotor
LatentSpace_v58	Ventral auditory area	lateral orbital gyrus	0.7572840380077386	Sensorimotor
LatentSpace_v58	Agranular insular area	claustrum	0.8327144291722889	Supramodal
LatentSpace_v58	Ectorhinal area	claustrum	0.9419412294503782	Supramodal
LatentSpace_v58	Primary motor area	paracentral lobule, anterior part	0.964508637789775	Sensorimotor
LatentSpace_v58	Secondary motor area	middle frontal gyrus	0.9197239589574869	Sensorimotor
LatentSpace_v58	Frontal pole, cerebral cortex	posterior orbital gyrus	0.7843097911353494	Supramodal
LatentSpace_v58	Orbital area	parolfactory gyri	0.8372667134564016	Supramodal
LatentSpace_v58	Posterior parietal association areas	frontal pole	0.8733927460165245	Supramodal
LatentSpace_v58	Perirhinal area	claustrum	0.8378744326625974	Supramodal
LatentSpace_v58	Primary somatosensory area	occipital pole	0.97139365690416	Sensorimotor
LatentSpace_v58	Supplemental somatosensory area	inferior frontal gyrus	0.7733959983861963	Sensorimotor
LatentSpace_v58	Temporal association areas	claustrum	0.8222504049815953	Supramodal
LatentSpace_v58	Visual areas	planum temporale	0.8710074261250583	Sensorimotor
LatentSpace_v59	Anterior cingulate area	middle frontal gyrus	0.8894247466955232	Supramodal
LatentSpace_v59	Infralimbic area	dentate gyrus	0.7986180586444733	Supramodal
LatentSpace_v59	Retrosplenial area	planum temporale	0.7374304921523844	Supramodal
LatentSpace_v59	Prelimbic area	gyrus rectus	0.8882542917684955	Supramodal
LatentSpace_v59	Primary auditory area	planum temporale	0.8746817308844975	Sensorimotor
LatentSpace_v59	Dorsal auditory area	transverse gyri	0.9008784215122185	Sensorimotor
LatentSpace_v59	Ventral auditory area	middle temporal gyrus	0.8309826606613013	Sensorimotor
LatentSpace_v59	Agranular insular area	temporal pole	0.8528548440557169	Supramodal
LatentSpace_v59	Ectorhinal area	claustrum	0.9226838066370453	Supramodal
LatentSpace_v59	Primary motor area	paracentral lobule, anterior part	0.9458274880842819	Sensorimotor
LatentSpace_v59	Secondary motor area	middle frontal gyrus	0.933922541615353	Sensorimotor
LatentSpace_v59	Frontal pole, cerebral cortex	medial orbital gyrus	0.7982350797326596	Supramodal
LatentSpace_v59	Orbital area	temporal pole	0.8752184827707493	Supramodal
LatentSpace_v59	Posterior parietal association areas	planum temporale	0.8875006385039391	Supramodal
LatentSpace_v59	Perirhinal area	parahippocampal gyrus	0.8520168424013644	Supramodal
LatentSpace_v59	Primary somatosensory area	transverse gyri	0.9278549108350734	Sensorimotor
LatentSpace_v59	Supplemental somatosensory area	inferior frontal gyrus	0.791101672598946	Sensorimotor
LatentSpace_v59	Temporal association areas	insula	0.8688600266332672	Supramodal
LatentSpace_v59	Visual areas	planum temporale	0.8714911317041529	Sensorimotor
LatentSpace_v60	Anterior cingulate area	cingulate gyrus	0.9165831481824478	Supramodal
LatentSpace_v60	Infralimbic area	paraterminal gyrus	0.8731666525822698	Supramodal
LatentSpace_v60	Retrosplenial area	planum temporale	0.7799471470045067	Supramodal
LatentSpace_v60	Prelimbic area	gyrus rectus	0.8633489541853784	Supramodal
LatentSpace_v60	Primary auditory area	lateral orbital gyrus	0.8571197161166045	Sensorimotor
LatentSpace_v60	Dorsal auditory area	planum temporale	0.9019481160954802	Sensorimotor
LatentSpace_v60	Ventral auditory area	inferior temporal gyrus	0.8135770860078377	Sensorimotor
LatentSpace_v60	Agranular insular area	claustrum	0.8366220506126533	Supramodal
LatentSpace_v60	Ectorhinal area	claustrum	0.9027847000273121	Supramodal
LatentSpace_v60	Primary motor area	paracentral lobule, anterior part	0.9381187415387849	Sensorimotor
LatentSpace_v60	Secondary motor area	superior frontal gyrus	0.9188210676441463	Sensorimotor
LatentSpace_v60	Frontal pole, cerebral cortex	posterior orbital gyrus	0.7345142656253392	Supramodal
LatentSpace_v60	Orbital area	claustrum	0.881868342268027	Supramodal
LatentSpace_v60	Posterior parietal association areas	planum temporale	0.8931984647314332	Supramodal
LatentSpace_v60	Perirhinal area	parahippocampal gyrus	0.8878047985574816	Supramodal
LatentSpace_v60	Primary somatosensory area	occipital pole	0.9526050217074585	Sensorimotor
LatentSpace_v60	Supplemental somatosensory area	inferior frontal gyrus	0.789944941508273	Sensorimotor
LatentSpace_v60	Temporal association areas	insula	0.8535717605114602	Supramodal
LatentSpace_v60	Visual areas	planum temporale	0.9005372434349492	Sensorimotor
LatentSpace_v61	Anterior cingulate area	superior frontal gyrus	0.8824653162668321	Supramodal
LatentSpace_v61	Infralimbic area	subiculum	0.8685700977702366	Supramodal
LatentSpace_v61	Retrosplenial area	paracentral lobule, posterior part	0.7316545368172411	Supramodal
LatentSpace_v61	Prelimbic area	cingulate gyrus	0.8648851352777471	Supramodal
LatentSpace_v61	Primary auditory area	planum temporale	0.899572097866808	Sensorimotor
LatentSpace_v61	Dorsal auditory area	planum temporale	0.924203489248643	Sensorimotor
LatentSpace_v61	Ventral auditory area	planum temporale	0.8351509440790362	Sensorimotor
LatentSpace_v61	Agranular insular area	claustrum	0.8647030528034196	Supramodal
LatentSpace_v61	Ectorhinal area	fusiform gyrus	0.8990486669090292	Supramodal
LatentSpace_v61	Primary motor area	paracentral lobule, anterior part	0.9595737971841627	Sensorimotor
LatentSpace_v61	Secondary motor area	middle frontal gyrus	0.9351663569966233	Sensorimotor
LatentSpace_v61	Frontal pole, cerebral cortex	frontal pole	0.8010958623133843	Supramodal
LatentSpace_v61	Orbital area	claustrum	0.9208461066576057	Supramodal
LatentSpace_v61	Posterior parietal association areas	planum temporale	0.837933162694265	Supramodal
LatentSpace_v61	Perirhinal area	parahippocampal gyrus	0.8421915998475571	Supramodal
LatentSpace_v61	Primary somatosensory area	transverse gyri	0.9698112989235338	Sensorimotor
LatentSpace_v61	Supplemental somatosensory area	Heschl's gyrus	0.8549122916001501	Sensorimotor
LatentSpace_v61	Temporal association areas	frontal pole	0.8100627743456137	Supramodal
LatentSpace_v61	Visual areas	planum temporale	0.8748384339877763	Sensorimotor
LatentSpace_v62	Anterior cingulate area	middle frontal gyrus	0.9540909086505742	Supramodal
LatentSpace_v62	Infralimbic area	dentate gyrus	0.8249929321966691	Supramodal
LatentSpace_v62	Retrosplenial area	superior occipital gyrus	0.8068805177026038	Supramodal
LatentSpace_v62	Prelimbic area	superior rostral gyrus	0.9023144933320981	Supramodal
LatentSpace_v62	Primary auditory area	planum temporale	0.847251989791457	Sensorimotor
LatentSpace_v62	Dorsal auditory area	planum temporale	0.8960467675476242	Sensorimotor
LatentSpace_v62	Ventral auditory area	lateral orbital gyrus	0.7614772771669942	Sensorimotor
LatentSpace_v62	Agranular insular area	posterior orbital gyrus	0.8871379539050093	Supramodal
LatentSpace_v62	Ectorhinal area	insula	0.88036510626399	Supramodal
LatentSpace_v62	Primary motor area	paracentral lobule, anterior part	0.949090882078088	Sensorimotor
LatentSpace_v62	Secondary motor area	middle frontal gyrus	0.9246605906935748	Sensorimotor
LatentSpace_v62	Frontal pole, cerebral cortex	posterior orbital gyrus	0.8263643617604303	Supramodal
LatentSpace_v62	Orbital area	gyrus rectus	0.9053176464135518	Supramodal
LatentSpace_v62	Posterior parietal association areas	planum temporale	0.9014988754401131	Supramodal
LatentSpace_v62	Perirhinal area	parahippocampal gyrus	0.8625185629053524	Supramodal
LatentSpace_v62	Primary somatosensory area	transverse gyri	0.933595486569346	Sensorimotor
LatentSpace_v62	Supplemental somatosensory area	occipito-temporal gyrus	0.7709608450863862	Sensorimotor
LatentSpace_v62	Temporal association areas	insula	0.7862279320389173	Supramodal
LatentSpace_v62	Visual areas	planum temporale	0.8909382965059786	Sensorimotor
LatentSpace_v63	Anterior cingulate area	superior frontal gyrus	0.9287348163124926	Supramodal
LatentSpace_v63	Infralimbic area	subiculum	0.8975585795854296	Supramodal
LatentSpace_v63	Retrosplenial area	planum temporale	0.7888901570830456	Supramodal
LatentSpace_v63	Prelimbic area	cingulate gyrus	0.8798270332596752	Supramodal
LatentSpace_v63	Primary auditory area	planum temporale	0.8497349371640995	Sensorimotor
LatentSpace_v63	Dorsal auditory area	planum temporale	0.8920932715395331	Sensorimotor
LatentSpace_v63	Ventral auditory area	middle temporal gyrus	0.7911791656987267	Sensorimotor
LatentSpace_v63	Agranular insular area	claustrum	0.8165995139377933	Supramodal
LatentSpace_v63	Ectorhinal area	claustrum	0.9511396045596733	Supramodal
LatentSpace_v63	Primary motor area	paracentral lobule, anterior part	0.9345258967082973	Sensorimotor
LatentSpace_v63	Secondary motor area	superior frontal gyrus	0.9199036923021049	Sensorimotor
LatentSpace_v63	Frontal pole, cerebral cortex	cingulate gyrus	0.7777551714496208	Supramodal
LatentSpace_v63	Orbital area	temporal pole	0.8593528933347884	Supramodal
LatentSpace_v63	Posterior parietal association areas	planum temporale	0.8837777207625126	Supramodal
LatentSpace_v63	Perirhinal area	parahippocampal gyrus	0.8551184956978606	Supramodal
LatentSpace_v63	Primary somatosensory area	transverse gyri	0.9282462533721799	Sensorimotor
LatentSpace_v63	Supplemental somatosensory area	inferior frontal gyrus	0.747657633566582	Sensorimotor
LatentSpace_v63	Temporal association areas	insula	0.8196668372435859	Supramodal
LatentSpace_v63	Visual areas	planum temporale	0.8858905161589449	Sensorimotor
LatentSpace_v64	Anterior cingulate area	superior frontal gyrus	0.9112403627917909	Supramodal
LatentSpace_v64	Infralimbic area	subiculum	0.7656263822173377	Supramodal
LatentSpace_v64	Retrosplenial area	planum temporale	0.7479177343259813	Supramodal
LatentSpace_v64	Prelimbic area	temporal pole	0.8663218331577281	Supramodal
LatentSpace_v64	Primary auditory area	planum temporale	0.8522541218858843	Sensorimotor
LatentSpace_v64	Dorsal auditory area	paracentral lobule, posterior part	0.9011504044784926	Sensorimotor
LatentSpace_v64	Ventral auditory area	lateral orbital gyrus	0.7739576148381212	Sensorimotor
LatentSpace_v64	Agranular insular area	claustrum	0.9288525827200527	Supramodal
LatentSpace_v64	Ectorhinal area	claustrum	0.9144099647743897	Supramodal
LatentSpace_v64	Primary motor area	paracentral lobule, anterior part	0.9615225133203846	Sensorimotor
LatentSpace_v64	Secondary motor area	superior frontal gyrus	0.9245910087963309	Sensorimotor
LatentSpace_v64	Frontal pole, cerebral cortex	claustrum	0.8032547812740752	Supramodal
LatentSpace_v64	Orbital area	claustrum	0.8911964220953629	Supramodal
LatentSpace_v64	Posterior parietal association areas	planum temporale	0.8655082014370458	Supramodal
LatentSpace_v64	Perirhinal area	parahippocampal gyrus	0.844672387289612	Supramodal
LatentSpace_v64	Primary somatosensory area	occipital pole	0.9775967653801909	Sensorimotor
LatentSpace_v64	Supplemental somatosensory area	occipital pole	0.8198132016626795	Sensorimotor
LatentSpace_v64	Temporal association areas	insula	0.8275414032388234	Supramodal
LatentSpace_v64	Visual areas	planum temporale	0.8966477394650348	Sensorimotor
LatentSpace_v65	Anterior cingulate area	cingulate gyrus	0.8851285892312563	Supramodal
LatentSpace_v65	Infralimbic area	dentate gyrus	0.8674842922402067	Supramodal
LatentSpace_v65	Retrosplenial area	planum temporale	0.7478146052399475	Supramodal
LatentSpace_v65	Prelimbic area	gyrus rectus	0.880708510919423	Supramodal
LatentSpace_v65	Primary auditory area	planum temporale	0.833179162900973	Sensorimotor
LatentSpace_v65	Dorsal auditory area	planum temporale	0.8743328740486891	Sensorimotor
LatentSpace_v65	Ventral auditory area	lateral orbital gyrus	0.7870735097960454	Sensorimotor
LatentSpace_v65	Agranular insular area	gyrus rectus	0.8468085788955433	Supramodal
LatentSpace_v65	Ectorhinal area	insula	0.8978946621683092	Supramodal
LatentSpace_v65	Primary motor area	paracentral lobule, anterior part	0.9648832315274125	Sensorimotor
LatentSpace_v65	Secondary motor area	middle frontal gyrus	0.9305014553391859	Sensorimotor
LatentSpace_v65	Frontal pole, cerebral cortex	anterior orbital gyrus	0.8011201928678265	Supramodal
LatentSpace_v65	Orbital area	gyrus rectus	0.8852930880872264	Supramodal
LatentSpace_v65	Posterior parietal association areas	planum temporale	0.8560442774043588	Supramodal
LatentSpace_v65	Perirhinal area	parahippocampal gyrus	0.8620763244350551	Supramodal
LatentSpace_v65	Primary somatosensory area	occipital pole	0.9614433603122619	Sensorimotor
LatentSpace_v65	Supplemental somatosensory area	inferior frontal gyrus	0.8328618019610767	Sensorimotor
LatentSpace_v65	Temporal association areas	insula	0.8187913665764827	Supramodal
LatentSpace_v65	Visual areas	planum temporale	0.8520967244234311	Sensorimotor
LatentSpace_v66	Anterior cingulate area	superior frontal gyrus	0.9025311658846124	Supramodal
LatentSpace_v66	Infralimbic area	subiculum	0.8203801711263881	Supramodal
LatentSpace_v66	Retrosplenial area	planum temporale	0.7245637524205355	Supramodal
LatentSpace_v66	Prelimbic area	gyrus rectus	0.8705622733431049	Supramodal
LatentSpace_v66	Primary auditory area	frontal pole	0.8969069602519952	Sensorimotor
LatentSpace_v66	Dorsal auditory area	planum temporale	0.9103778414293953	Sensorimotor
LatentSpace_v66	Ventral auditory area	frontal pole	0.8625214226056718	Sensorimotor
LatentSpace_v66	Agranular insular area	claustrum	0.8396903011946586	Supramodal
LatentSpace_v66	Ectorhinal area	temporal pole	0.9075006869407212	Supramodal
LatentSpace_v66	Primary motor area	paracentral lobule, anterior part	0.9519207946638247	Sensorimotor
LatentSpace_v66	Secondary motor area	middle frontal gyrus	0.9154148984106907	Sensorimotor
LatentSpace_v66	Frontal pole, cerebral cortex	superior rostral gyrus	0.7723017120736575	Supramodal
LatentSpace_v66	Orbital area	parolfactory gyri	0.895813924376402	Supramodal
LatentSpace_v66	Posterior parietal association areas	planum temporale	0.8650502897062154	Supramodal
LatentSpace_v66	Perirhinal area	parahippocampal gyrus	0.8713823542223069	Supramodal
LatentSpace_v66	Primary somatosensory area	transverse gyri	0.9685446249124493	Sensorimotor
LatentSpace_v66	Supplemental somatosensory area	middle temporal gyrus	0.8616511713410188	Sensorimotor
LatentSpace_v66	Temporal association areas	insula	0.8801454788588164	Supramodal
LatentSpace_v66	Visual areas	planum temporale	0.8748104340912038	Sensorimotor
LatentSpace_v67	Anterior cingulate area	middle frontal gyrus	0.8438554902097114	Supramodal
LatentSpace_v67	Infralimbic area	paraterminal gyrus	0.8462742842765727	Supramodal
LatentSpace_v67	Retrosplenial area	superior parietal lobule	0.660095662749671	Supramodal
LatentSpace_v67	Prelimbic area	superior rostral gyrus	0.8744148089634579	Supramodal
LatentSpace_v67	Primary auditory area	lateral orbital gyrus	0.8295320876990614	Sensorimotor
LatentSpace_v67	Dorsal auditory area	transverse gyri	0.8669721246877955	Sensorimotor
LatentSpace_v67	Ventral auditory area	lateral orbital gyrus	0.786438801328528	Sensorimotor
LatentSpace_v67	Agranular insular area	claustrum	0.9035710144588138	Supramodal
LatentSpace_v67	Ectorhinal area	insula	0.8911579739969141	Supramodal
LatentSpace_v67	Primary motor area	paracentral lobule, anterior part	0.9491924818658836	Sensorimotor
LatentSpace_v67	Secondary motor area	middle frontal gyrus	0.9173885762037135	Sensorimotor
LatentSpace_v67	Frontal pole, cerebral cortex	posterior orbital gyrus	0.8633407354812545	Supramodal
LatentSpace_v67	Orbital area	claustrum	0.9237631276275944	Supramodal
LatentSpace_v67	Posterior parietal association areas	planum temporale	0.842864636131065	Supramodal
LatentSpace_v67	Perirhinal area	parahippocampal gyrus	0.7937967847914219	Supramodal
LatentSpace_v67	Primary somatosensory area	transverse gyri	0.9491940961037443	Sensorimotor
LatentSpace_v67	Supplemental somatosensory area	inferior frontal gyrus	0.7938353169998367	Sensorimotor
LatentSpace_v67	Temporal association areas	insula	0.7977916583285938	Supramodal
LatentSpace_v67	Visual areas	planum temporale	0.8603990303311861	Sensorimotor
LatentSpace_v68	Anterior cingulate area	cingulate gyrus	0.88471924726117	Supramodal
LatentSpace_v68	Infralimbic area	paraterminal gyrus	0.898270885826295	Supramodal
LatentSpace_v68	Retrosplenial area	planum temporale	0.8355564484153519	Supramodal
LatentSpace_v68	Prelimbic area	temporal pole	0.8495736787164582	Supramodal
LatentSpace_v68	Primary auditory area	planum temporale	0.9134767585610608	Sensorimotor
LatentSpace_v68	Dorsal auditory area	planum temporale	0.9442600657677368	Sensorimotor
LatentSpace_v68	Ventral auditory area	lateral orbital gyrus	0.8686110996374456	Sensorimotor
LatentSpace_v68	Agranular insular area	claustrum	0.9040924282962672	Supramodal
LatentSpace_v68	Ectorhinal area	claustrum	0.9277812868798092	Supramodal
LatentSpace_v68	Primary motor area	inferior frontal gyrus	0.9454663373557398	Sensorimotor
LatentSpace_v68	Secondary motor area	frontal pole	0.9320586765164248	Sensorimotor
LatentSpace_v68	Frontal pole, cerebral cortex	gyrus rectus	0.804327065804636	Supramodal
LatentSpace_v68	Orbital area	parolfactory gyri	0.9018124597563649	Supramodal
LatentSpace_v68	Posterior parietal association areas	planum temporale	0.9089944227788861	Supramodal
LatentSpace_v68	Perirhinal area	parahippocampal gyrus	0.8368822144176435	Supramodal
LatentSpace_v68	Primary somatosensory area	transverse gyri	0.974765044109284	Sensorimotor
LatentSpace_v68	Supplemental somatosensory area	inferior frontal gyrus	0.8993711034161475	Sensorimotor
LatentSpace_v68	Temporal association areas	inferior temporal gyrus	0.8958208415234422	Supramodal
LatentSpace_v68	Visual areas	planum temporale	0.9165603350017886	Sensorimotor
LatentSpace_v69	Anterior cingulate area	superior frontal gyrus	0.935421866675217	Supramodal
LatentSpace_v69	Infralimbic area	CA2 field	0.8633684830052365	Supramodal
LatentSpace_v69	Retrosplenial area	paracentral lobule, posterior part	0.7885580831249794	Supramodal
LatentSpace_v69	Prelimbic area	inferior rostral gyrus	0.8729754399361199	Supramodal
LatentSpace_v69	Primary auditory area	lateral orbital gyrus	0.8528282403219893	Sensorimotor
LatentSpace_v69	Dorsal auditory area	Heschl's gyrus	0.8989119618785076	Sensorimotor
LatentSpace_v69	Ventral auditory area	lateral orbital gyrus	0.8052612926875662	Sensorimotor
LatentSpace_v69	Agranular insular area	claustrum	0.8417055715033458	Supramodal
LatentSpace_v69	Ectorhinal area	claustrum	0.8989505045367676	Supramodal
LatentSpace_v69	Primary motor area	paracentral lobule, anterior part	0.9625276406089581	Sensorimotor
LatentSpace_v69	Secondary motor area	superior frontal gyrus	0.951355975016676	Sensorimotor
LatentSpace_v69	Frontal pole, cerebral cortex	posterior orbital gyrus	0.8235735793592444	Supramodal
LatentSpace_v69	Orbital area	gyrus rectus	0.8732488523850708	Supramodal
LatentSpace_v69	Posterior parietal association areas	planum temporale	0.903678230499582	Supramodal
LatentSpace_v69	Perirhinal area	parahippocampal gyrus	0.8108824806576685	Supramodal
LatentSpace_v69	Primary somatosensory area	occipital pole	0.9652198613083839	Sensorimotor
LatentSpace_v69	Supplemental somatosensory area	lateral orbital gyrus	0.8172793593962493	Sensorimotor
LatentSpace_v69	Temporal association areas	inferior temporal gyrus	0.8058398770087412	Supramodal
LatentSpace_v69	Visual areas	planum temporale	0.9084495179807649	Sensorimotor
LatentSpace_v70	Anterior cingulate area	middle frontal gyrus	0.9378906319330546	Supramodal
LatentSpace_v70	Infralimbic area	subiculum	0.8397657778820135	Supramodal
LatentSpace_v70	Retrosplenial area	paracentral lobule, posterior part	0.7886644316809946	Supramodal
LatentSpace_v70	Prelimbic area	gyrus rectus	0.8669194158327522	Supramodal
LatentSpace_v70	Primary auditory area	frontal pole	0.9194662964165413	Sensorimotor
LatentSpace_v70	Dorsal auditory area	occipito-temporal gyrus	0.9353056549009097	Sensorimotor
LatentSpace_v70	Ventral auditory area	lateral orbital gyrus	0.9135174780811849	Sensorimotor
LatentSpace_v70	Agranular insular area	claustrum	0.8459938346183039	Supramodal
LatentSpace_v70	Ectorhinal area	claustrum	0.9547362750442946	Supramodal
LatentSpace_v70	Primary motor area	paracentral lobule, anterior part	0.963423307016116	Sensorimotor
LatentSpace_v70	Secondary motor area	middle frontal gyrus	0.9309538409156601	Sensorimotor
LatentSpace_v70	Frontal pole, cerebral cortex	frontal pole	0.7812076199477632	Supramodal
LatentSpace_v70	Orbital area	gyrus rectus	0.8695179127794638	Supramodal
LatentSpace_v70	Posterior parietal association areas	paracentral lobule, posterior part	0.8634352942320462	Supramodal
LatentSpace_v70	Perirhinal area	parahippocampal gyrus	0.8749446214270387	Supramodal
LatentSpace_v70	Primary somatosensory area	transverse gyri	0.9605919312793044	Sensorimotor
LatentSpace_v70	Supplemental somatosensory area	Heschl's gyrus	0.8749760709877134	Sensorimotor
LatentSpace_v70	Temporal association areas	inferior temporal gyrus	0.9049847462075457	Supramodal
LatentSpace_v70	Visual areas	planum temporale	0.8963855639479351	Sensorimotor
LatentSpace_v71	Anterior cingulate area	superior frontal gyrus	0.8512671483773879	Supramodal
LatentSpace_v71	Infralimbic area	paraterminal gyrus	0.8916998979859924	Supramodal
LatentSpace_v71	Retrosplenial area	planum temporale	0.7572645470331986	Supramodal
LatentSpace_v71	Prelimbic area	CA1 field	0.7672832970211428	Supramodal
LatentSpace_v71	Primary auditory area	planum temporale	0.871521738337026	Sensorimotor
LatentSpace_v71	Dorsal auditory area	Heschl's gyrus	0.9166030624151826	Sensorimotor
LatentSpace_v71	Ventral auditory area	lateral orbital gyrus	0.8407129370390953	Sensorimotor
LatentSpace_v71	Agranular insular area	claustrum	0.8645329810083249	Supramodal
LatentSpace_v71	Ectorhinal area	claustrum	0.9532828934122737	Supramodal
LatentSpace_v71	Primary motor area	paracentral lobule, anterior part	0.9371374897960442	Sensorimotor
LatentSpace_v71	Secondary motor area	superior frontal gyrus	0.8746707643502611	Sensorimotor
LatentSpace_v71	Frontal pole, cerebral cortex	cingulate gyrus	0.738788978060005	Supramodal
LatentSpace_v71	Orbital area	parahippocampal gyrus	0.8392488140777388	Supramodal
LatentSpace_v71	Posterior parietal association areas	planum temporale	0.8599060552089975	Supramodal
LatentSpace_v71	Perirhinal area	parahippocampal gyrus	0.8341538838106164	Supramodal
LatentSpace_v71	Primary somatosensory area	transverse gyri	0.955106215610646	Sensorimotor
LatentSpace_v71	Supplemental somatosensory area	occipito-temporal gyrus	0.8515092624849337	Sensorimotor
LatentSpace_v71	Temporal association areas	inferior temporal gyrus	0.8468333683104212	Supramodal
LatentSpace_v71	Visual areas	planum temporale	0.8893632845973234	Sensorimotor
LatentSpace_v72	Anterior cingulate area	superior frontal gyrus	0.8706194292483134	Supramodal
LatentSpace_v72	Infralimbic area	paraterminal gyrus	0.8304495115121847	Supramodal
LatentSpace_v72	Retrosplenial area	planum temporale	0.7442037391059898	Supramodal
LatentSpace_v72	Prelimbic area	parolfactory gyri	0.8429212684600302	Supramodal
LatentSpace_v72	Primary auditory area	planum temporale	0.8784496731013857	Sensorimotor
LatentSpace_v72	Dorsal auditory area	Heschl's gyrus	0.9241706125455877	Sensorimotor
LatentSpace_v72	Ventral auditory area	lateral orbital gyrus	0.8402348404373278	Sensorimotor
LatentSpace_v72	Agranular insular area	claustrum	0.8806749575843191	Supramodal
LatentSpace_v72	Ectorhinal area	claustrum	0.8900111192579104	Supramodal
LatentSpace_v72	Primary motor area	paracentral lobule, anterior part	0.9352985261970608	Sensorimotor
LatentSpace_v72	Secondary motor area	middle frontal gyrus	0.9027573539755935	Sensorimotor
LatentSpace_v72	Frontal pole, cerebral cortex	superior frontal gyrus	0.7561495186772356	Supramodal
LatentSpace_v72	Orbital area	superior rostral gyrus	0.878881823802281	Supramodal
LatentSpace_v72	Posterior parietal association areas	planum temporale	0.9072921447289367	Supramodal
LatentSpace_v72	Perirhinal area	parahippocampal gyrus	0.8274219026811104	Supramodal
LatentSpace_v72	Primary somatosensory area	transverse gyri	0.9345445024652131	Sensorimotor
LatentSpace_v72	Supplemental somatosensory area	occipito-temporal gyrus	0.8222173785805472	Sensorimotor
LatentSpace_v72	Temporal association areas	inferior temporal gyrus	0.8140068589208885	Supramodal
LatentSpace_v72	Visual areas	planum temporale	0.9183859724448908	Sensorimotor
LatentSpace_v73	Anterior cingulate area	superior frontal gyrus	0.9088372552443873	Supramodal
LatentSpace_v73	Infralimbic area	subiculum	0.8905559879095712	Supramodal
LatentSpace_v73	Retrosplenial area	paracentral lobule, posterior part	0.7563716282043492	Supramodal
LatentSpace_v73	Prelimbic area	gyrus rectus	0.8796503448440697	Supramodal
LatentSpace_v73	Primary auditory area	planum temporale	0.8945230181117662	Sensorimotor
LatentSpace_v73	Dorsal auditory area	planum temporale	0.9359812811793232	Sensorimotor
LatentSpace_v73	Ventral auditory area	lateral orbital gyrus	0.8469769063170195	Sensorimotor
LatentSpace_v73	Agranular insular area	claustrum	0.9215789183606404	Supramodal
LatentSpace_v73	Ectorhinal area	insula	0.8965440198453541	Supramodal
LatentSpace_v73	Primary motor area	paracentral lobule, anterior part	0.949551746725515	Sensorimotor
LatentSpace_v73	Secondary motor area	middle frontal gyrus	0.9176811197991579	Sensorimotor
LatentSpace_v73	Frontal pole, cerebral cortex	superior frontal gyrus	0.7819101168632316	Supramodal
LatentSpace_v73	Orbital area	claustrum	0.9329781105686413	Supramodal
LatentSpace_v73	Posterior parietal association areas	planum temporale	0.8844552759874484	Supramodal
LatentSpace_v73	Perirhinal area	parahippocampal gyrus	0.8280113145580806	Supramodal
LatentSpace_v73	Primary somatosensory area	transverse gyri	0.9596331413748502	Sensorimotor
LatentSpace_v73	Supplemental somatosensory area	middle temporal gyrus	0.8551382800402941	Sensorimotor
LatentSpace_v73	Temporal association areas	insula	0.8446970187899788	Supramodal
LatentSpace_v73	Visual areas	planum temporale	0.9086901211433273	Sensorimotor
LatentSpace_v74	Anterior cingulate area	superior frontal gyrus	0.9289032795428633	Supramodal
LatentSpace_v74	Infralimbic area	CA1 field	0.8714667140692761	Supramodal
LatentSpace_v74	Retrosplenial area	paracentral lobule, posterior part	0.7836025995789438	Supramodal
LatentSpace_v74	Prelimbic area	temporal pole	0.8894827352958814	Supramodal
LatentSpace_v74	Primary auditory area	frontal pole	0.9250459079741767	Sensorimotor
LatentSpace_v74	Dorsal auditory area	transverse gyri	0.9383155335061738	Sensorimotor
LatentSpace_v74	Ventral auditory area	lateral orbital gyrus	0.9027040719287265	Sensorimotor
LatentSpace_v74	Agranular insular area	claustrum	0.8346151559053526	Supramodal
LatentSpace_v74	Ectorhinal area	claustrum	0.9699065860875451	Supramodal
LatentSpace_v74	Primary motor area	paracentral lobule, anterior part	0.9653760994573578	Sensorimotor
LatentSpace_v74	Secondary motor area	middle frontal gyrus	0.930721519492145	Sensorimotor
LatentSpace_v74	Frontal pole, cerebral cortex	posterior orbital gyrus	0.7833421966248654	Supramodal
LatentSpace_v74	Orbital area	temporal pole	0.8494000499519669	Supramodal
LatentSpace_v74	Posterior parietal association areas	planum temporale	0.8975985447381425	Supramodal
LatentSpace_v74	Perirhinal area	parahippocampal gyrus	0.8901700486763021	Supramodal
LatentSpace_v74	Primary somatosensory area	occipital pole	0.9627005380715151	Sensorimotor
LatentSpace_v74	Supplemental somatosensory area	Heschl's gyrus	0.8600467318436866	Sensorimotor
LatentSpace_v74	Temporal association areas	frontal operculum	0.9145404786048242	Supramodal
LatentSpace_v74	Visual areas	planum temporale	0.8931128716271409	Sensorimotor
LatentSpace_v75	Anterior cingulate area	superior frontal gyrus	0.9069291700138259	Supramodal
LatentSpace_v75	Infralimbic area	subiculum	0.8458652247273205	Supramodal
LatentSpace_v75	Retrosplenial area	paracentral lobule, posterior part	0.7669757921608147	Supramodal
LatentSpace_v75	Prelimbic area	medial orbital gyrus	0.8766755958615111	Supramodal
LatentSpace_v75	Primary auditory area	frontal pole	0.839535986830424	Sensorimotor
LatentSpace_v75	Dorsal auditory area	planum temporale	0.8804446732897222	Sensorimotor
LatentSpace_v75	Ventral auditory area	frontal pole	0.797473735316825	Sensorimotor
LatentSpace_v75	Agranular insular area	claustrum	0.8882782655216404	Supramodal
LatentSpace_v75	Ectorhinal area	claustrum	0.9334424463365785	Supramodal
LatentSpace_v75	Primary motor area	paracentral lobule, anterior part	0.9506232051841601	Sensorimotor
LatentSpace_v75	Secondary motor area	inferior frontal gyrus	0.9396152598377515	Sensorimotor
LatentSpace_v75	Frontal pole, cerebral cortex	posterior orbital gyrus	0.81316074658807	Supramodal
LatentSpace_v75	Orbital area	gyrus rectus	0.8847533395461851	Supramodal
LatentSpace_v75	Posterior parietal association areas	planum temporale	0.8841025793146311	Supramodal
LatentSpace_v75	Perirhinal area	parahippocampal gyrus	0.8513020474294065	Supramodal
LatentSpace_v75	Primary somatosensory area	occipital pole	0.9686547614507397	Sensorimotor
LatentSpace_v75	Supplemental somatosensory area	transverse gyri	0.7717512291474902	Sensorimotor
LatentSpace_v75	Temporal association areas	insula	0.8492054822606665	Supramodal
LatentSpace_v75	Visual areas	planum temporale	0.9038488345301057	Sensorimotor
LatentSpace_v76	Anterior cingulate area	cingulate gyrus	0.9104438660344205	Supramodal
LatentSpace_v76	Infralimbic area	subiculum	0.8759462141751133	Supramodal
LatentSpace_v76	Retrosplenial area	superior parietal lobule	0.7608845334692238	Supramodal
LatentSpace_v76	Prelimbic area	superior rostral gyrus	0.8662773083398123	Supramodal
LatentSpace_v76	Primary auditory area	planum temporale	0.903479024279035	Sensorimotor
LatentSpace_v76	Dorsal auditory area	planum temporale	0.9393052324606791	Sensorimotor
LatentSpace_v76	Ventral auditory area	lateral orbital gyrus	0.8738143013459593	Sensorimotor
LatentSpace_v76	Agranular insular area	posterior orbital gyrus	0.8589814582709979	Supramodal
LatentSpace_v76	Ectorhinal area	fusiform gyrus	0.9296668709945597	Supramodal
LatentSpace_v76	Primary motor area	paracentral lobule, anterior part	0.9791459276654811	Sensorimotor
LatentSpace_v76	Secondary motor area	middle frontal gyrus	0.938930439610353	Sensorimotor
LatentSpace_v76	Frontal pole, cerebral cortex	posterior orbital gyrus	0.780715012503217	Supramodal
LatentSpace_v76	Orbital area	claustrum	0.9138890366273574	Supramodal
LatentSpace_v76	Posterior parietal association areas	planum temporale	0.8940928827745361	Supramodal
LatentSpace_v76	Perirhinal area	temporal pole	0.8672010336157764	Supramodal
LatentSpace_v76	Primary somatosensory area	occipital pole	0.9734936528629626	Sensorimotor
LatentSpace_v76	Supplemental somatosensory area	Heschl's gyrus	0.8728170523873054	Sensorimotor
LatentSpace_v76	Temporal association areas	inferior temporal gyrus	0.8932662578840779	Supramodal
LatentSpace_v76	Visual areas	planum temporale	0.920460936391234	Sensorimotor
LatentSpace_v77	Anterior cingulate area	superior frontal gyrus	0.953294654806699	Supramodal
LatentSpace_v77	Infralimbic area	paraterminal gyrus	0.8893661022518423	Supramodal
LatentSpace_v77	Retrosplenial area	paracentral lobule, posterior part	0.7641133377661995	Supramodal
LatentSpace_v77	Prelimbic area	gyrus rectus	0.9333818723771178	Supramodal
LatentSpace_v77	Primary auditory area	planum temporale	0.8913263328935396	Sensorimotor
LatentSpace_v77	Dorsal auditory area	planum temporale	0.9134758539140754	Sensorimotor
LatentSpace_v77	Ventral auditory area	lateral orbital gyrus	0.8469532144126436	Sensorimotor
LatentSpace_v77	Agranular insular area	claustrum	0.924528558262444	Supramodal
LatentSpace_v77	Ectorhinal area	claustrum	0.9338185895114812	Supramodal
LatentSpace_v77	Primary motor area	paracentral lobule, anterior part	0.9393498577190508	Sensorimotor
LatentSpace_v77	Secondary motor area	frontal pole	0.9249466331688042	Sensorimotor
LatentSpace_v77	Frontal pole, cerebral cortex	claustrum	0.8488893689944438	Supramodal
LatentSpace_v77	Orbital area	gyrus rectus	0.9284394051435626	Supramodal
LatentSpace_v77	Posterior parietal association areas	planum temporale	0.9182365778317063	Supramodal
LatentSpace_v77	Perirhinal area	parahippocampal gyrus	0.8813245392185146	Supramodal
LatentSpace_v77	Primary somatosensory area	occipital pole	0.9554505662366541	Sensorimotor
LatentSpace_v77	Supplemental somatosensory area	occipito-temporal gyrus	0.8239968833519973	Sensorimotor
LatentSpace_v77	Temporal association areas	inferior temporal gyrus	0.8665428236254086	Supramodal
LatentSpace_v77	Visual areas	transverse gyri	0.9131604956653449	Sensorimotor
LatentSpace_v78	Anterior cingulate area	superior frontal gyrus	0.9106935300646265	Supramodal
LatentSpace_v78	Infralimbic area	CA2 field	0.8391318713250164	Supramodal
LatentSpace_v78	Retrosplenial area	planum temporale	0.741389322566633	Supramodal
LatentSpace_v78	Prelimbic area	inferior rostral gyrus	0.8466520945592068	Supramodal
LatentSpace_v78	Primary auditory area	frontal pole	0.8628537094663815	Sensorimotor
LatentSpace_v78	Dorsal auditory area	planum temporale	0.8972757762438792	Sensorimotor
LatentSpace_v78	Ventral auditory area	insula	0.8019370534790607	Sensorimotor
LatentSpace_v78	Agranular insular area	claustrum	0.8330207255888351	Supramodal
LatentSpace_v78	Ectorhinal area	claustrum	0.9090166467932225	Supramodal
LatentSpace_v78	Primary motor area	paracentral lobule, anterior part	0.9649435664153786	Sensorimotor
LatentSpace_v78	Secondary motor area	middle frontal gyrus	0.9315009785678612	Sensorimotor
LatentSpace_v78	Frontal pole, cerebral cortex	posterior orbital gyrus	0.7464591923695357	Supramodal
LatentSpace_v78	Orbital area	temporal pole	0.8614903332507875	Supramodal
LatentSpace_v78	Posterior parietal association areas	frontal pole	0.8658821421977216	Supramodal
LatentSpace_v78	Perirhinal area	parahippocampal gyrus	0.8707882427873068	Supramodal
LatentSpace_v78	Primary somatosensory area	transverse gyri	0.9586611625757305	Sensorimotor
LatentSpace_v78	Supplemental somatosensory area	middle temporal gyrus	0.8329856354114568	Sensorimotor
LatentSpace_v78	Temporal association areas	insula	0.8515817606287472	Supramodal
LatentSpace_v78	Visual areas	planum temporale	0.8809543819656607	Sensorimotor
LatentSpace_v79	Anterior cingulate area	middle frontal gyrus	0.9302345975012155	Supramodal
LatentSpace_v79	Infralimbic area	subiculum	0.8709915248343354	Supramodal
LatentSpace_v79	Retrosplenial area	planum temporale	0.7426805995571423	Supramodal
LatentSpace_v79	Prelimbic area	superior rostral gyrus	0.9020299576820555	Supramodal
LatentSpace_v79	Primary auditory area	planum temporale	0.9017812874942551	Sensorimotor
LatentSpace_v79	Dorsal auditory area	transverse gyri	0.9299680674829246	Sensorimotor
LatentSpace_v79	Ventral auditory area	lateral orbital gyrus	0.8709430088540262	Sensorimotor
LatentSpace_v79	Agranular insular area	claustrum	0.8996933809152519	Supramodal
LatentSpace_v79	Ectorhinal area	insula	0.9227956537683598	Supramodal
LatentSpace_v79	Primary motor area	paracentral lobule, anterior part	0.9528646234140608	Sensorimotor
LatentSpace_v79	Secondary motor area	middle frontal gyrus	0.9348574360117269	Sensorimotor
LatentSpace_v79	Frontal pole, cerebral cortex	posterior orbital gyrus	0.8202638438974983	Supramodal
LatentSpace_v79	Orbital area	gyrus rectus	0.9134659642403897	Supramodal
LatentSpace_v79	Posterior parietal association areas	planum temporale	0.9013240289201219	Supramodal
LatentSpace_v79	Perirhinal area	parahippocampal gyrus	0.8960830775863434	Supramodal
LatentSpace_v79	Primary somatosensory area	occipital pole	0.9505573728092266	Sensorimotor
LatentSpace_v79	Supplemental somatosensory area	occipito-temporal gyrus	0.86560140215346	Sensorimotor
LatentSpace_v79	Temporal association areas	insula	0.8804357925727591	Supramodal
LatentSpace_v79	Visual areas	planum temporale	0.9191885666080517	Sensorimotor
LatentSpace_v80	Anterior cingulate area	superior frontal gyrus	0.8740498016526111	Supramodal
LatentSpace_v80	Infralimbic area	subiculum	0.8573235814931935	Supramodal
LatentSpace_v80	Retrosplenial area	superior parietal lobule	0.7133843046220782	Supramodal
LatentSpace_v80	Prelimbic area	gyrus rectus	0.8048524432642555	Supramodal
LatentSpace_v80	Primary auditory area	planum temporale	0.8706216664751483	Sensorimotor
LatentSpace_v80	Dorsal auditory area	planum temporale	0.909430227359116	Sensorimotor
LatentSpace_v80	Ventral auditory area	lateral orbital gyrus	0.8343342099243746	Sensorimotor
LatentSpace_v80	Agranular insular area	claustrum	0.8677418671811987	Supramodal
LatentSpace_v80	Ectorhinal area	insula	0.8823169740286584	Supramodal
LatentSpace_v80	Primary motor area	paracentral lobule, anterior part	0.9566831854996427	Sensorimotor
LatentSpace_v80	Secondary motor area	superior frontal gyrus	0.906768865812287	Sensorimotor
LatentSpace_v80	Frontal pole, cerebral cortex	anterior orbital gyrus	0.713394910514936	Supramodal
LatentSpace_v80	Orbital area	claustrum	0.874613860654898	Supramodal
LatentSpace_v80	Posterior parietal association areas	planum temporale	0.8428108169172187	Supramodal
LatentSpace_v80	Perirhinal area	parahippocampal gyrus	0.8494099403439662	Supramodal
LatentSpace_v80	Primary somatosensory area	occipital pole	0.9786392231624595	Sensorimotor
LatentSpace_v80	Supplemental somatosensory area	lateral orbital gyrus	0.8763711219162372	Sensorimotor
LatentSpace_v80	Temporal association areas	insula	0.8228112789546795	Supramodal
LatentSpace_v80	Visual areas	planum temporale	0.8757169917609037	Sensorimotor
LatentSpace_v81	Anterior cingulate area	superior frontal gyrus	0.8882808907032288	Supramodal
LatentSpace_v81	Infralimbic area	paraterminal gyrus	0.842006863633333	Supramodal
LatentSpace_v81	Retrosplenial area	planum temporale	0.7199175088196597	Supramodal
LatentSpace_v81	Prelimbic area	gyrus rectus	0.853837385444144	Supramodal
LatentSpace_v81	Primary auditory area	lateral orbital gyrus	0.9114572941137559	Sensorimotor
LatentSpace_v81	Dorsal auditory area	lateral orbital gyrus	0.9321831455110452	Sensorimotor
LatentSpace_v81	Ventral auditory area	inferior temporal gyrus	0.8818567884510118	Sensorimotor
LatentSpace_v81	Agranular insular area	claustrum	0.8271832004137366	Supramodal
LatentSpace_v81	Ectorhinal area	claustrum	0.9468884579368823	Supramodal
LatentSpace_v81	Primary motor area	paracentral lobule, anterior part	0.9697318394254948	Sensorimotor
LatentSpace_v81	Secondary motor area	superior frontal gyrus	0.9345267730633169	Sensorimotor
LatentSpace_v81	Frontal pole, cerebral cortex	posterior orbital gyrus	0.7973457429741501	Supramodal
LatentSpace_v81	Orbital area	gyrus rectus	0.8645998364195213	Supramodal
LatentSpace_v81	Posterior parietal association areas	planum temporale	0.8652482494552988	Supramodal
LatentSpace_v81	Perirhinal area	parahippocampal gyrus	0.8630361134924558	Supramodal
LatentSpace_v81	Primary somatosensory area	transverse gyri	0.9758363622257554	Sensorimotor
LatentSpace_v81	Supplemental somatosensory area	inferior frontal gyrus	0.8793641689524303	Sensorimotor
LatentSpace_v81	Temporal association areas	inferior rostral gyrus	0.9066141935077738	Supramodal
LatentSpace_v81	Visual areas	planum temporale	0.8946277140049756	Sensorimotor
LatentSpace_v82	Anterior cingulate area	cingulate gyrus	0.9315590456440053	Supramodal
LatentSpace_v82	Infralimbic area	paraterminal gyrus	0.8567712512630781	Supramodal
LatentSpace_v82	Retrosplenial area	planum temporale	0.7442741011415057	Supramodal
LatentSpace_v82	Prelimbic area	claustrum	0.8968296349357466	Supramodal
LatentSpace_v82	Primary auditory area	planum temporale	0.8757092155957171	Sensorimotor
LatentSpace_v82	Dorsal auditory area	transverse gyri	0.9038153184982779	Sensorimotor
LatentSpace_v82	Ventral auditory area	planum temporale	0.828975813432392	Sensorimotor
LatentSpace_v82	Agranular insular area	claustrum	0.9015662401050218	Supramodal
LatentSpace_v82	Ectorhinal area	temporal pole	0.9404853978757121	Supramodal
LatentSpace_v82	Primary motor area	occipito-temporal gyrus	0.9514605037532359	Sensorimotor
LatentSpace_v82	Secondary motor area	frontal pole	0.9448964459585744	Sensorimotor
LatentSpace_v82	Frontal pole, cerebral cortex	frontal pole	0.8404312914316933	Supramodal
LatentSpace_v82	Orbital area	claustrum	0.8930297861391995	Supramodal
LatentSpace_v82	Posterior parietal association areas	planum temporale	0.8495227186160019	Supramodal
LatentSpace_v82	Perirhinal area	parahippocampal gyrus	0.8872751965137923	Supramodal
LatentSpace_v82	Primary somatosensory area	occipital pole	0.9584252023932542	Sensorimotor
LatentSpace_v82	Supplemental somatosensory area	occipito-temporal gyrus	0.8311053419323143	Sensorimotor
LatentSpace_v82	Temporal association areas	inferior rostral gyrus	0.8733702381299953	Supramodal
LatentSpace_v82	Visual areas	planum temporale	0.8544670248724666	Sensorimotor
LatentSpace_v83	Anterior cingulate area	cingulate gyrus	0.8717921292891776	Supramodal
LatentSpace_v83	Infralimbic area	dentate gyrus	0.8758127988803169	Supramodal
LatentSpace_v83	Retrosplenial area	planum temporale	0.776925704913055	Supramodal
LatentSpace_v83	Prelimbic area	gyrus rectus	0.841670986725691	Supramodal
LatentSpace_v83	Primary auditory area	paracentral lobule, posterior part	0.8721290214487463	Sensorimotor
LatentSpace_v83	Dorsal auditory area	paracentral lobule, posterior part	0.9139810279238713	Sensorimotor
LatentSpace_v83	Ventral auditory area	lateral orbital gyrus	0.8458766147432227	Sensorimotor
LatentSpace_v83	Agranular insular area	claustrum	0.8599536394162929	Supramodal
LatentSpace_v83	Ectorhinal area	claustrum	0.9511649412821342	Supramodal
LatentSpace_v83	Primary motor area	paracentral lobule, anterior part	0.9429560279676553	Sensorimotor
LatentSpace_v83	Secondary motor area	paracentral lobule, anterior part	0.8832477842518821	Sensorimotor
LatentSpace_v83	Frontal pole, cerebral cortex	frontal pole	0.733213156870345	Supramodal
LatentSpace_v83	Orbital area	temporal pole	0.8628225898717096	Supramodal
LatentSpace_v83	Posterior parietal association areas	planum temporale	0.88846372913719	Supramodal
LatentSpace_v83	Perirhinal area	parahippocampal gyrus	0.8307535531188573	Supramodal
LatentSpace_v83	Primary somatosensory area	transverse gyri	0.9631917936201773	Sensorimotor
LatentSpace_v83	Supplemental somatosensory area	inferior frontal gyrus	0.8904427106074081	Sensorimotor
LatentSpace_v83	Temporal association areas	inferior rostral gyrus	0.8838188950999241	Supramodal
LatentSpace_v83	Visual areas	planum temporale	0.8932810788682564	Sensorimotor
LatentSpace_v84	Anterior cingulate area	cingulate gyrus	0.8972987389993886	Supramodal
LatentSpace_v84	Infralimbic area	paraterminal gyrus	0.8143749625553008	Supramodal
LatentSpace_v84	Retrosplenial area	paracentral lobule, posterior part	0.7548639523966547	Supramodal
LatentSpace_v84	Prelimbic area	gyrus rectus	0.8836384427999535	Supramodal
LatentSpace_v84	Primary auditory area	lateral orbital gyrus	0.8978344825716756	Sensorimotor
LatentSpace_v84	Dorsal auditory area	planum temporale	0.9354308832778407	Sensorimotor
LatentSpace_v84	Ventral auditory area	lateral orbital gyrus	0.8632947919974636	Sensorimotor
LatentSpace_v84	Agranular insular area	claustrum	0.9100413395424034	Supramodal
LatentSpace_v84	Ectorhinal area	temporal pole	0.9351563457673406	Supramodal
LatentSpace_v84	Primary motor area	paracentral lobule, anterior part	0.9476602002709342	Sensorimotor
LatentSpace_v84	Secondary motor area	superior frontal gyrus	0.921771499936535	Sensorimotor
LatentSpace_v84	Frontal pole, cerebral cortex	posterior orbital gyrus	0.8093676741922572	Supramodal
LatentSpace_v84	Orbital area	claustrum	0.8880449553586435	Supramodal
LatentSpace_v84	Posterior parietal association areas	planum temporale	0.8700633301460552	Supramodal
LatentSpace_v84	Perirhinal area	parahippocampal gyrus	0.9188736122965302	Supramodal
LatentSpace_v84	Primary somatosensory area	transverse gyri	0.9782374100592268	Sensorimotor
LatentSpace_v84	Supplemental somatosensory area	lateral orbital gyrus	0.8626251107324292	Sensorimotor
LatentSpace_v84	Temporal association areas	insula	0.9183199351296943	Supramodal
LatentSpace_v84	Visual areas	planum temporale	0.9176510382711435	Sensorimotor
LatentSpace_v85	Anterior cingulate area	superior frontal gyrus	0.9281080179570989	Supramodal
LatentSpace_v85	Infralimbic area	subiculum	0.8882527407184515	Supramodal
LatentSpace_v85	Retrosplenial area	paracentral lobule, posterior part	0.8299990303484889	Supramodal
LatentSpace_v85	Prelimbic area	parolfactory gyri	0.8835323748979926	Supramodal
LatentSpace_v85	Primary auditory area	frontal pole	0.8168906355558029	Sensorimotor
LatentSpace_v85	Dorsal auditory area	planum temporale	0.8458409019305299	Sensorimotor
LatentSpace_v85	Ventral auditory area	planum polare	0.7939229911540854	Sensorimotor
LatentSpace_v85	Agranular insular area	claustrum	0.8172392029111956	Supramodal
LatentSpace_v85	Ectorhinal area	temporal pole	0.9151915609180633	Supramodal
LatentSpace_v85	Primary motor area	paracentral lobule, anterior part	0.9257030488346979	Sensorimotor
LatentSpace_v85	Secondary motor area	middle frontal gyrus	0.8984106478739489	Sensorimotor
LatentSpace_v85	Frontal pole, cerebral cortex	posterior orbital gyrus	0.7558825023448338	Supramodal
LatentSpace_v85	Orbital area	temporal pole	0.8813433498508998	Supramodal
LatentSpace_v85	Posterior parietal association areas	paracentral lobule, posterior part	0.8740629879960956	Supramodal
LatentSpace_v85	Perirhinal area	parahippocampal gyrus	0.9077722387696687	Supramodal
LatentSpace_v85	Primary somatosensory area	occipital pole	0.921826020289215	Sensorimotor
LatentSpace_v85	Supplemental somatosensory area	transverse gyri	0.7737072189209626	Sensorimotor
LatentSpace_v85	Temporal association areas	insula	0.867211799627388	Supramodal
LatentSpace_v85	Visual areas	planum temporale	0.8713131030850603	Sensorimotor
LatentSpace_v86	Anterior cingulate area	superior frontal gyrus	0.8344406678808953	Supramodal
LatentSpace_v86	Infralimbic area	paraterminal gyrus	0.8637128459263622	Supramodal
LatentSpace_v86	Retrosplenial area	planum temporale	0.73147751851	Supramodal
LatentSpace_v86	Prelimbic area	parolfactory gyri	0.9027178487456978	Supramodal
LatentSpace_v86	Primary auditory area	planum temporale	0.8214137728363645	Sensorimotor
LatentSpace_v86	Dorsal auditory area	planum temporale	0.8935570409270039	Sensorimotor
LatentSpace_v86	Ventral auditory area	middle temporal gyrus	0.7670148047120987	Sensorimotor
LatentSpace_v86	Agranular insular area	claustrum	0.9304710519604009	Supramodal
LatentSpace_v86	Ectorhinal area	claustrum	0.8786590651876317	Supramodal
LatentSpace_v86	Primary motor area	paracentral lobule, anterior part	0.9302623024819263	Sensorimotor
LatentSpace_v86	Secondary motor area	superior frontal gyrus	0.896154198069415	Sensorimotor
LatentSpace_v86	Frontal pole, cerebral cortex	claustrum	0.7501541581999682	Supramodal
LatentSpace_v86	Orbital area	parolfactory gyri	0.8968016016118037	Supramodal
LatentSpace_v86	Posterior parietal association areas	planum temporale	0.8774566835409707	Supramodal
LatentSpace_v86	Perirhinal area	parahippocampal gyrus	0.8470839696557523	Supramodal
LatentSpace_v86	Primary somatosensory area	inferior occipital gyrus	0.934428303309294	Sensorimotor
LatentSpace_v86	Supplemental somatosensory area	occipito-temporal gyrus	0.7199769019485006	Sensorimotor
LatentSpace_v86	Temporal association areas	insula	0.7853936567288745	Supramodal
LatentSpace_v86	Visual areas	planum temporale	0.8796624282055253	Sensorimotor
LatentSpace_v87	Anterior cingulate area	cingulate gyrus	0.892883498572989	Supramodal
LatentSpace_v87	Infralimbic area	paraterminal gyrus	0.916684703443894	Supramodal
LatentSpace_v87	Retrosplenial area	planum temporale	0.764052126615027	Supramodal
LatentSpace_v87	Prelimbic area	parolfactory gyri	0.8728766348433165	Supramodal
LatentSpace_v87	Primary auditory area	planum temporale	0.9123723948459951	Sensorimotor
LatentSpace_v87	Dorsal auditory area	planum temporale	0.9491543084607044	Sensorimotor
LatentSpace_v87	Ventral auditory area	lateral orbital gyrus	0.8518236755461819	Sensorimotor
LatentSpace_v87	Agranular insular area	claustrum	0.8773647560121748	Supramodal
LatentSpace_v87	Ectorhinal area	insula	0.8924078141582529	Supramodal
LatentSpace_v87	Primary motor area	paracentral lobule, anterior part	0.9404050389325184	Sensorimotor
LatentSpace_v87	Secondary motor area	superior frontal gyrus	0.909058778348141	Sensorimotor
LatentSpace_v87	Frontal pole, cerebral cortex	claustrum	0.73502390489402	Supramodal
LatentSpace_v87	Orbital area	claustrum	0.8904811507214242	Supramodal
LatentSpace_v87	Posterior parietal association areas	planum temporale	0.8987245459148328	Supramodal
LatentSpace_v87	Perirhinal area	parahippocampal gyrus	0.800528120477371	Supramodal
LatentSpace_v87	Primary somatosensory area	paracentral lobule, anterior part	0.9454537817842595	Sensorimotor
LatentSpace_v87	Supplemental somatosensory area	inferior frontal gyrus	0.8534258454529624	Sensorimotor
LatentSpace_v87	Temporal association areas	inferior temporal gyrus	0.8515899206419761	Supramodal
LatentSpace_v87	Visual areas	planum temporale	0.9239342493919672	Sensorimotor
LatentSpace_v88	Anterior cingulate area	superior frontal gyrus	0.9037773261188338	Supramodal
LatentSpace_v88	Infralimbic area	paraterminal gyrus	0.775656182058689	Supramodal
LatentSpace_v88	Retrosplenial area	precentral gyrus	0.7538519581983165	Supramodal
LatentSpace_v88	Prelimbic area	gyrus rectus	0.8688357800384869	Supramodal
LatentSpace_v88	Primary auditory area	frontal pole	0.9092139607078502	Sensorimotor
LatentSpace_v88	Dorsal auditory area	occipito-temporal gyrus	0.9270918229945146	Sensorimotor
LatentSpace_v88	Ventral auditory area	lateral orbital gyrus	0.8684160529702104	Sensorimotor
LatentSpace_v88	Agranular insular area	claustrum	0.8715349521967577	Supramodal
LatentSpace_v88	Ectorhinal area	fusiform gyrus	0.9035619056122675	Supramodal
LatentSpace_v88	Primary motor area	paracentral lobule, anterior part	0.933021375598982	Sensorimotor
LatentSpace_v88	Secondary motor area	middle frontal gyrus	0.9142127557880388	Sensorimotor
LatentSpace_v88	Frontal pole, cerebral cortex	claustrum	0.8038041944618505	Supramodal
LatentSpace_v88	Orbital area	gyrus rectus	0.8301605689450686	Supramodal
LatentSpace_v88	Posterior parietal association areas	planum temporale	0.8895936695516592	Supramodal
LatentSpace_v88	Perirhinal area	parahippocampal gyrus	0.8048441473807982	Supramodal
LatentSpace_v88	Primary somatosensory area	occipital pole	0.9514170490128261	Sensorimotor
LatentSpace_v88	Supplemental somatosensory area	superior temporal gyrus	0.861362851753532	Sensorimotor
LatentSpace_v88	Temporal association areas	insula	0.8720594022792946	Supramodal
LatentSpace_v88	Visual areas	frontal pole	0.8891994136980758	Sensorimotor
LatentSpace_v89	Anterior cingulate area	superior frontal gyrus	0.9125965942729204	Supramodal
LatentSpace_v89	Infralimbic area	subiculum	0.9020056107463718	Supramodal
LatentSpace_v89	Retrosplenial area	paracentral lobule, posterior part	0.7998908813591258	Supramodal
LatentSpace_v89	Prelimbic area	superior rostral gyrus	0.8713208926283857	Supramodal
LatentSpace_v89	Primary auditory area	frontal pole	0.867543608109124	Sensorimotor
LatentSpace_v89	Dorsal auditory area	planum temporale	0.9058282247949739	Sensorimotor
LatentSpace_v89	Ventral auditory area	frontal pole	0.8455137139343245	Sensorimotor
LatentSpace_v89	Agranular insular area	claustrum	0.9143649502023238	Supramodal
LatentSpace_v89	Ectorhinal area	insula	0.8888108017959123	Supramodal
LatentSpace_v89	Primary motor area	paracentral lobule, anterior part	0.9647452402661016	Sensorimotor
LatentSpace_v89	Secondary motor area	middle frontal gyrus	0.9201365500307982	Sensorimotor
LatentSpace_v89	Frontal pole, cerebral cortex	posterior orbital gyrus	0.7752731072534551	Supramodal
LatentSpace_v89	Orbital area	claustrum	0.9162160249843917	Supramodal
LatentSpace_v89	Posterior parietal association areas	paracentral lobule, posterior part	0.8603736937663389	Supramodal
LatentSpace_v89	Perirhinal area	parahippocampal gyrus	0.8602727367390531	Supramodal
LatentSpace_v89	Primary somatosensory area	transverse gyri	0.9611417019004153	Sensorimotor
LatentSpace_v89	Supplemental somatosensory area	Heschl's gyrus	0.801488662976573	Sensorimotor
LatentSpace_v89	Temporal association areas	frontal pole	0.8274962531752186	Supramodal
LatentSpace_v89	Visual areas	planum temporale	0.8790760913589873	Sensorimotor
LatentSpace_v90	Anterior cingulate area	anterior orbital gyrus	0.9335862527208386	Supramodal
LatentSpace_v90	Infralimbic area	subiculum	0.8116024248791411	Supramodal
LatentSpace_v90	Retrosplenial area	paracentral lobule, posterior part	0.7521775715888118	Supramodal
LatentSpace_v90	Prelimbic area	temporal pole	0.8726159592680092	Supramodal
LatentSpace_v90	Primary auditory area	planum temporale	0.9122091106505094	Sensorimotor
LatentSpace_v90	Dorsal auditory area	planum temporale	0.9541631985531467	Sensorimotor
LatentSpace_v90	Ventral auditory area	planum temporale	0.8464283867048646	Sensorimotor
LatentSpace_v90	Agranular insular area	gyrus rectus	0.8464927065751511	Supramodal
LatentSpace_v90	Ectorhinal area	temporal pole	0.89957789280233	Supramodal
LatentSpace_v90	Primary motor area	paracentral lobule, anterior part	0.9599230280571	Sensorimotor
LatentSpace_v90	Secondary motor area	posterior orbital gyrus	0.9345196214480865	Sensorimotor
LatentSpace_v90	Frontal pole, cerebral cortex	posterior orbital gyrus	0.8273852664446318	Supramodal
LatentSpace_v90	Orbital area	temporal pole	0.8759262198752323	Supramodal
LatentSpace_v90	Posterior parietal association areas	paracentral lobule, posterior part	0.8750088418139733	Supramodal
LatentSpace_v90	Perirhinal area	parahippocampal gyrus	0.8405400580173373	Supramodal
LatentSpace_v90	Primary somatosensory area	transverse gyri	0.9661448112980158	Sensorimotor
LatentSpace_v90	Supplemental somatosensory area	occipito-temporal gyrus	0.8453805182488021	Sensorimotor
LatentSpace_v90	Temporal association areas	inferior temporal gyrus	0.8383423594704462	Supramodal
LatentSpace_v90	Visual areas	planum temporale	0.9364934821679933	Sensorimotor
LatentSpace_v91	Anterior cingulate area	superior frontal gyrus	0.8948065772298586	Supramodal
LatentSpace_v91	Infralimbic area	subiculum	0.8324982919072195	Supramodal
LatentSpace_v91	Retrosplenial area	paracentral lobule, posterior part	0.7927399995254361	Supramodal
LatentSpace_v91	Prelimbic area	gyrus rectus	0.8616215262435103	Supramodal
LatentSpace_v91	Primary auditory area	planum temporale	0.8918369036905365	Sensorimotor
LatentSpace_v91	Dorsal auditory area	planum temporale	0.928813263556078	Sensorimotor
LatentSpace_v91	Ventral auditory area	lateral orbital gyrus	0.8546498888170464	Sensorimotor
LatentSpace_v91	Agranular insular area	claustrum	0.843101325495979	Supramodal
LatentSpace_v91	Ectorhinal area	claustrum	0.9030633839967598	Supramodal
LatentSpace_v91	Primary motor area	paracentral lobule, anterior part	0.9444667897656758	Sensorimotor
LatentSpace_v91	Secondary motor area	superior frontal gyrus	0.9219433667578008	Sensorimotor
LatentSpace_v91	Frontal pole, cerebral cortex	posterior orbital gyrus	0.7902726239268852	Supramodal
LatentSpace_v91	Orbital area	temporal pole	0.8708481317909318	Supramodal
LatentSpace_v91	Posterior parietal association areas	planum temporale	0.8822145542493035	Supramodal
LatentSpace_v91	Perirhinal area	parahippocampal gyrus	0.8218745490324737	Supramodal
LatentSpace_v91	Primary somatosensory area	transverse gyri	0.9444634500112729	Sensorimotor
LatentSpace_v91	Supplemental somatosensory area	inferior frontal gyrus	0.8203122683087493	Sensorimotor
LatentSpace_v91	Temporal association areas	inferior temporal gyrus	0.8551945737246587	Supramodal
LatentSpace_v91	Visual areas	planum temporale	0.8999085797025032	Sensorimotor
LatentSpace_v92	Anterior cingulate area	middle frontal gyrus	0.8617557295996074	Supramodal
LatentSpace_v92	Infralimbic area	subiculum	0.8958593130360767	Supramodal
LatentSpace_v92	Retrosplenial area	planum temporale	0.7263424679108242	Supramodal
LatentSpace_v92	Prelimbic area	superior rostral gyrus	0.7966536055179488	Supramodal
LatentSpace_v92	Primary auditory area	planum temporale	0.901244876216086	Sensorimotor
LatentSpace_v92	Dorsal auditory area	transverse gyri	0.937355240413159	Sensorimotor
LatentSpace_v92	Ventral auditory area	frontal pole	0.8529813296017585	Sensorimotor
LatentSpace_v92	Agranular insular area	claustrum	0.8976369048860208	Supramodal
LatentSpace_v92	Ectorhinal area	insula	0.8805214791116396	Supramodal
LatentSpace_v92	Primary motor area	paracentral lobule, anterior part	0.9317411719117273	Sensorimotor
LatentSpace_v92	Secondary motor area	superior frontal gyrus	0.9072720688277286	Sensorimotor
LatentSpace_v92	Frontal pole, cerebral cortex	claustrum	0.7844652744637265	Supramodal
LatentSpace_v92	Orbital area	claustrum	0.8379896938853407	Supramodal
LatentSpace_v92	Posterior parietal association areas	planum temporale	0.8874903366356373	Supramodal
LatentSpace_v92	Perirhinal area	parahippocampal gyrus	0.8158837498608117	Supramodal
LatentSpace_v92	Primary somatosensory area	transverse gyri	0.9375101140746789	Sensorimotor
LatentSpace_v92	Supplemental somatosensory area	transverse gyri	0.8353602460729869	Sensorimotor
LatentSpace_v92	Temporal association areas	inferior temporal gyrus	0.8402764269007491	Supramodal
LatentSpace_v92	Visual areas	planum temporale	0.911995694061334	Sensorimotor
LatentSpace_v93	Anterior cingulate area	superior frontal gyrus	0.9308490903075328	Supramodal
LatentSpace_v93	Infralimbic area	CA3 field	0.753610358926853	Supramodal
LatentSpace_v93	Retrosplenial area	paracentral lobule, posterior part	0.8152309539167875	Supramodal
LatentSpace_v93	Prelimbic area	gyrus rectus	0.8312502027228289	Supramodal
LatentSpace_v93	Primary auditory area	lateral orbital gyrus	0.8910460912013818	Sensorimotor
LatentSpace_v93	Dorsal auditory area	transverse gyri	0.9260586579931586	Sensorimotor
LatentSpace_v93	Ventral auditory area	lateral orbital gyrus	0.8527685296151162	Sensorimotor
LatentSpace_v93	Agranular insular area	claustrum	0.8532189624436046	Supramodal
LatentSpace_v93	Ectorhinal area	claustrum	0.8869122011391822	Supramodal
LatentSpace_v93	Primary motor area	paracentral lobule, anterior part	0.951865316538445	Sensorimotor
LatentSpace_v93	Secondary motor area	paracentral lobule, anterior part	0.8981243952943679	Sensorimotor
LatentSpace_v93	Frontal pole, cerebral cortex	claustrum	0.7098332153760206	Supramodal
LatentSpace_v93	Orbital area	claustrum	0.9007518325635108	Supramodal
LatentSpace_v93	Posterior parietal association areas	planum temporale	0.9169311475579051	Supramodal
LatentSpace_v93	Perirhinal area	parahippocampal gyrus	0.8472738614725361	Supramodal
LatentSpace_v93	Primary somatosensory area	occipital pole	0.9634560605245113	Sensorimotor
LatentSpace_v93	Supplemental somatosensory area	inferior frontal gyrus	0.8168771727524938	Sensorimotor
LatentSpace_v93	Temporal association areas	insula	0.8537682275823376	Supramodal
LatentSpace_v93	Visual areas	planum temporale	0.927941135182714	Sensorimotor
LatentSpace_v94	Anterior cingulate area	middle frontal gyrus	0.9172743286505477	Supramodal
LatentSpace_v94	Infralimbic area	subiculum	0.8086420878019147	Supramodal
LatentSpace_v94	Retrosplenial area	paracentral lobule, posterior part	0.7601290244715291	Supramodal
LatentSpace_v94	Prelimbic area	gyrus rectus	0.8643476279252994	Supramodal
LatentSpace_v94	Primary auditory area	planum temporale	0.8627225696834934	Sensorimotor
LatentSpace_v94	Dorsal auditory area	planum temporale	0.903145706124136	Sensorimotor
LatentSpace_v94	Ventral auditory area	lateral orbital gyrus	0.8115587934518574	Sensorimotor
LatentSpace_v94	Agranular insular area	claustrum	0.9226870236723981	Supramodal
LatentSpace_v94	Ectorhinal area	temporal pole	0.8843874476944698	Supramodal
LatentSpace_v94	Primary motor area	paracentral lobule, anterior part	0.9730800078658574	Sensorimotor
LatentSpace_v94	Secondary motor area	paracentral lobule, anterior part	0.9332677707913937	Sensorimotor
LatentSpace_v94	Frontal pole, cerebral cortex	claustrum	0.7822665393510256	Supramodal
LatentSpace_v94	Orbital area	claustrum	0.9269987056879356	Supramodal
LatentSpace_v94	Posterior parietal association areas	planum temporale	0.8343419591599709	Supramodal
LatentSpace_v94	Perirhinal area	parahippocampal gyrus	0.8158888602508306	Supramodal
LatentSpace_v94	Primary somatosensory area	occipital pole	0.9740976709357196	Sensorimotor
LatentSpace_v94	Supplemental somatosensory area	lateral orbital gyrus	0.8539120910126202	Sensorimotor
LatentSpace_v94	Temporal association areas	insula	0.7977209622601538	Supramodal
LatentSpace_v94	Visual areas	transverse gyri	0.844733050692719	Sensorimotor
LatentSpace_v95	Anterior cingulate area	superior frontal gyrus	0.9337982109018546	Supramodal
LatentSpace_v95	Infralimbic area	dentate gyrus	0.8020711402971757	Supramodal
LatentSpace_v95	Retrosplenial area	planum temporale	0.7830724911502159	Supramodal
LatentSpace_v95	Prelimbic area	gyrus rectus	0.8732659770606493	Supramodal
LatentSpace_v95	Primary auditory area	lateral orbital gyrus	0.9142762854581148	Sensorimotor
LatentSpace_v95	Dorsal auditory area	planum temporale	0.9248290994854891	Sensorimotor
LatentSpace_v95	Ventral auditory area	inferior temporal gyrus	0.899164589628625	Sensorimotor
LatentSpace_v95	Agranular insular area	temporal pole	0.8187574681753408	Supramodal
LatentSpace_v95	Ectorhinal area	temporal pole	0.9205090094168248	Supramodal
LatentSpace_v95	Primary motor area	paracentral lobule, anterior part	0.9548927281244909	Sensorimotor
LatentSpace_v95	Secondary motor area	frontal pole	0.9412396045163245	Sensorimotor
LatentSpace_v95	Frontal pole, cerebral cortex	frontal pole	0.8032838291243	Supramodal
LatentSpace_v95	Orbital area	parolfactory gyri	0.871940128341265	Supramodal
LatentSpace_v95	Posterior parietal association areas	frontal pole	0.8793061538188003	Supramodal
LatentSpace_v95	Perirhinal area	parahippocampal gyrus	0.8753259275950571	Supramodal
LatentSpace_v95	Primary somatosensory area	transverse gyri	0.930625762997002	Sensorimotor
LatentSpace_v95	Supplemental somatosensory area	superior temporal gyrus	0.8325001876087095	Sensorimotor
LatentSpace_v95	Temporal association areas	insula	0.8956798321196434	Supramodal
LatentSpace_v95	Visual areas	frontal pole	0.8919935080676265	Sensorimotor
LatentSpace_v96	Anterior cingulate area	cingulate gyrus	0.9268904811663917	Supramodal
LatentSpace_v96	Infralimbic area	paraterminal gyrus	0.860949062966496	Supramodal
LatentSpace_v96	Retrosplenial area	planum temporale	0.7384998274315889	Supramodal
LatentSpace_v96	Prelimbic area	temporal pole	0.859759557440822	Supramodal
LatentSpace_v96	Primary auditory area	planum temporale	0.8441911882429645	Sensorimotor
LatentSpace_v96	Dorsal auditory area	superior parietal lobule	0.8887668612374429	Sensorimotor
LatentSpace_v96	Ventral auditory area	planum temporale	0.7814844661287615	Sensorimotor
LatentSpace_v96	Agranular insular area	claustrum	0.8143791442488626	Supramodal
LatentSpace_v96	Ectorhinal area	claustrum	0.9258851386544001	Supramodal
LatentSpace_v96	Primary motor area	paracentral lobule, anterior part	0.9359165141527435	Sensorimotor
LatentSpace_v96	Secondary motor area	posterior orbital gyrus	0.8881217920519778	Sensorimotor
LatentSpace_v96	Frontal pole, cerebral cortex	posterior orbital gyrus	0.7153163212900048	Supramodal
LatentSpace_v96	Orbital area	parolfactory gyri	0.8757964502967556	Supramodal
LatentSpace_v96	Posterior parietal association areas	planum temporale	0.8878229310295468	Supramodal
LatentSpace_v96	Perirhinal area	claustrum	0.7423988218252501	Supramodal
LatentSpace_v96	Primary somatosensory area	occipital pole	0.9593600670848553	Sensorimotor
LatentSpace_v96	Supplemental somatosensory area	occipito-temporal gyrus	0.8210744836408617	Sensorimotor
LatentSpace_v96	Temporal association areas	inferior temporal gyrus	0.7649589154268227	Supramodal
LatentSpace_v96	Visual areas	planum temporale	0.8827387097313103	Sensorimotor
LatentSpace_v97	Anterior cingulate area	cingulate gyrus	0.8984049647211886	Supramodal
LatentSpace_v97	Infralimbic area	subiculum	0.7910094926421339	Supramodal
LatentSpace_v97	Retrosplenial area	planum temporale	0.6874059741478284	Supramodal
LatentSpace_v97	Prelimbic area	gyrus rectus	0.8445485995997779	Supramodal
LatentSpace_v97	Primary auditory area	frontal pole	0.9037437974488275	Sensorimotor
LatentSpace_v97	Dorsal auditory area	planum temporale	0.9387922668208111	Sensorimotor
LatentSpace_v97	Ventral auditory area	lateral orbital gyrus	0.8640253388865233	Sensorimotor
LatentSpace_v97	Agranular insular area	claustrum	0.8492825412242917	Supramodal
LatentSpace_v97	Ectorhinal area	claustrum	0.9443713721180236	Supramodal
LatentSpace_v97	Primary motor area	paracentral lobule, anterior part	0.9651427026721169	Sensorimotor
LatentSpace_v97	Secondary motor area	superior frontal gyrus	0.9123881221723061	Sensorimotor
LatentSpace_v97	Frontal pole, cerebral cortex	posterior orbital gyrus	0.7673048038513165	Supramodal
LatentSpace_v97	Orbital area	temporal pole	0.8626396638352019	Supramodal
LatentSpace_v97	Posterior parietal association areas	planum temporale	0.8483500431529996	Supramodal
LatentSpace_v97	Perirhinal area	claustrum	0.8382100654653566	Supramodal
LatentSpace_v97	Primary somatosensory area	occipital pole	0.9739516947350498	Sensorimotor
LatentSpace_v97	Supplemental somatosensory area	inferior frontal gyrus	0.8588432461466543	Sensorimotor
LatentSpace_v97	Temporal association areas	insula	0.8763228670340751	Supramodal
LatentSpace_v97	Visual areas	planum temporale	0.8841716401173805	Sensorimotor
LatentSpace_v98	Anterior cingulate area	superior frontal gyrus	0.9285976502859646	Supramodal
LatentSpace_v98	Infralimbic area	paraterminal gyrus	0.859351968406597	Supramodal
LatentSpace_v98	Retrosplenial area	precentral gyrus	0.8097743403165639	Supramodal
LatentSpace_v98	Prelimbic area	gyrus rectus	0.8835675398306718	Supramodal
LatentSpace_v98	Primary auditory area	occipito-temporal gyrus	0.8581924253264341	Sensorimotor
LatentSpace_v98	Dorsal auditory area	occipital pole	0.9101567867168946	Sensorimotor
LatentSpace_v98	Ventral auditory area	lateral orbital gyrus	0.8135165821444164	Sensorimotor
LatentSpace_v98	Agranular insular area	claustrum	0.9109807389880014	Supramodal
LatentSpace_v98	Ectorhinal area	insula	0.9244423501062758	Supramodal
LatentSpace_v98	Primary motor area	paracentral lobule, anterior part	0.9601428422495029	Sensorimotor
LatentSpace_v98	Secondary motor area	superior frontal gyrus	0.9247857075500402	Sensorimotor
LatentSpace_v98	Frontal pole, cerebral cortex	claustrum	0.8169691585248441	Supramodal
LatentSpace_v98	Orbital area	temporal pole	0.8994764974292352	Supramodal
LatentSpace_v98	Posterior parietal association areas	planum temporale	0.9161941993581508	Supramodal
LatentSpace_v98	Perirhinal area	parahippocampal gyrus	0.8854707140063726	Supramodal
LatentSpace_v98	Primary somatosensory area	occipital pole	0.9650044070788554	Sensorimotor
LatentSpace_v98	Supplemental somatosensory area	occipito-temporal gyrus	0.8468451672156357	Sensorimotor
LatentSpace_v98	Temporal association areas	inferior temporal gyrus	0.8512588545634423	Supramodal
LatentSpace_v98	Visual areas	superior parietal lobule	0.9073786011682989	Sensorimotor
LatentSpace_v99	Anterior cingulate area	cingulate gyrus	0.9129810415086713	Supramodal
LatentSpace_v99	Infralimbic area	subiculum	0.8323555743977811	Supramodal
LatentSpace_v99	Retrosplenial area	planum temporale	0.6962701987769059	Supramodal
LatentSpace_v99	Prelimbic area	parolfactory gyri	0.8642047754184855	Supramodal
LatentSpace_v99	Primary auditory area	planum temporale	0.8650382226729123	Sensorimotor
LatentSpace_v99	Dorsal auditory area	planum temporale	0.9068184320721792	Sensorimotor
LatentSpace_v99	Ventral auditory area	frontal pole	0.8136558507644444	Sensorimotor
LatentSpace_v99	Agranular insular area	claustrum	0.8742357510902081	Supramodal
LatentSpace_v99	Ectorhinal area	claustrum	0.931694824935156	Supramodal
LatentSpace_v99	Primary motor area	paracentral lobule, anterior part	0.9674414917689941	Sensorimotor
LatentSpace_v99	Secondary motor area	middle frontal gyrus	0.949775523921049	Sensorimotor
LatentSpace_v99	Frontal pole, cerebral cortex	superior frontal gyrus	0.8081485605168074	Supramodal
LatentSpace_v99	Orbital area	parolfactory gyri	0.9050338374288257	Supramodal
LatentSpace_v99	Posterior parietal association areas	planum temporale	0.8555788646823468	Supramodal
LatentSpace_v99	Perirhinal area	parahippocampal gyrus	0.8710105319390016	Supramodal
LatentSpace_v99	Primary somatosensory area	occipital pole	0.982710287738931	Sensorimotor
LatentSpace_v99	Supplemental somatosensory area	Heschl's gyrus	0.8401758809719863	Sensorimotor
LatentSpace_v99	Temporal association areas	insula	0.8542447216918374	Supramodal
LatentSpace_v99	Visual areas	planum temporale	0.8901560294408709	Sensorimotor
LatentSpace_v100	Anterior cingulate area	superior frontal gyrus	0.9195977229806632	Supramodal
LatentSpace_v100	Infralimbic area	paraterminal gyrus	0.8091052510838197	Supramodal
LatentSpace_v100	Retrosplenial area	planum temporale	0.7127274105245569	Supramodal
LatentSpace_v100	Prelimbic area	superior rostral gyrus	0.7886109603246545	Supramodal
LatentSpace_v100	Primary auditory area	lateral orbital gyrus	0.8933042670376803	Sensorimotor
LatentSpace_v100	Dorsal auditory area	paracentral lobule, posterior part	0.9327491084262839	Sensorimotor
LatentSpace_v100	Ventral auditory area	inferior temporal gyrus	0.8657690577793682	Sensorimotor
LatentSpace_v100	Agranular insular area	claustrum	0.817703491247853	Supramodal
LatentSpace_v100	Ectorhinal area	insula	0.8841540437981812	Supramodal
LatentSpace_v100	Primary motor area	paracentral lobule, anterior part	0.9674717354915074	Sensorimotor
LatentSpace_v100	Secondary motor area	middle frontal gyrus	0.9095209183068356	Sensorimotor
LatentSpace_v100	Frontal pole, cerebral cortex	frontal pole	0.6999070178379885	Supramodal
LatentSpace_v100	Orbital area	claustrum	0.85568736564875	Supramodal
LatentSpace_v100	Posterior parietal association areas	frontal pole	0.8741680012137126	Supramodal
LatentSpace_v100	Perirhinal area	claustrum	0.8231124449714079	Supramodal
LatentSpace_v100	Primary somatosensory area	occipital pole	0.980229118599546	Sensorimotor
LatentSpace_v100	Supplemental somatosensory area	occipito-temporal gyrus	0.8693687867643052	Sensorimotor
LatentSpace_v100	Temporal association areas	inferior rostral gyrus	0.9000991909570194	Supramodal
LatentSpace_v100	Visual areas	planum temporale	0.9127745999904463	Sensorimotor
LatentSpace_v101	Anterior cingulate area	superior frontal gyrus	0.8751226293726544	Supramodal
LatentSpace_v101	Infralimbic area	paraterminal gyrus	0.8324196549606051	Supramodal
LatentSpace_v101	Retrosplenial area	planum temporale	0.741132089244207	Supramodal
LatentSpace_v101	Prelimbic area	claustrum	0.8217821417492098	Supramodal
LatentSpace_v101	Primary auditory area	lateral orbital gyrus	0.9019450931866646	Sensorimotor
LatentSpace_v101	Dorsal auditory area	lateral orbital gyrus	0.915120070970401	Sensorimotor
LatentSpace_v101	Ventral auditory area	inferior temporal gyrus	0.8638545395807674	Sensorimotor
LatentSpace_v101	Agranular insular area	claustrum	0.873065351215583	Supramodal
LatentSpace_v101	Ectorhinal area	temporal pole	0.9358188259257237	Supramodal
LatentSpace_v101	Primary motor area	paracentral lobule, anterior part	0.9635561223127844	Sensorimotor
LatentSpace_v101	Secondary motor area	middle frontal gyrus	0.8994080797229945	Sensorimotor
LatentSpace_v101	Frontal pole, cerebral cortex	frontal pole	0.7696121380926844	Supramodal
LatentSpace_v101	Orbital area	claustrum	0.8704220643597778	Supramodal
LatentSpace_v101	Posterior parietal association areas	planum temporale	0.880594097340443	Supramodal
LatentSpace_v101	Perirhinal area	parahippocampal gyrus	0.889506680506662	Supramodal
LatentSpace_v101	Primary somatosensory area	occipital pole	0.9647224651782065	Sensorimotor
LatentSpace_v101	Supplemental somatosensory area	inferior frontal gyrus	0.8374904652657948	Sensorimotor
LatentSpace_v101	Temporal association areas	gyrus rectus	0.9082855283700446	Supramodal
LatentSpace_v101	Visual areas	planum temporale	0.9083225197493107	Sensorimotor
LatentSpace_v102	Anterior cingulate area	cingulate gyrus	0.8745006286676056	Supramodal
LatentSpace_v102	Infralimbic area	subiculum	0.8095716082692553	Supramodal
LatentSpace_v102	Retrosplenial area	paracentral lobule, posterior part	0.7641963436541657	Supramodal
LatentSpace_v102	Prelimbic area	temporal pole	0.8062091345900626	Supramodal
LatentSpace_v102	Primary auditory area	frontal pole	0.9135408443886939	Sensorimotor
LatentSpace_v102	Dorsal auditory area	planum temporale	0.936613585403587	Sensorimotor
LatentSpace_v102	Ventral auditory area	frontal pole	0.8899445848422699	Sensorimotor
LatentSpace_v102	Agranular insular area	claustrum	0.8034432600246798	Supramodal
LatentSpace_v102	Ectorhinal area	claustrum	0.9132589267929766	Supramodal
LatentSpace_v102	Primary motor area	paracentral lobule, anterior part	0.9235204461974432	Sensorimotor
LatentSpace_v102	Secondary motor area	superior frontal gyrus	0.8861049003702829	Sensorimotor
LatentSpace_v102	Frontal pole, cerebral cortex	gyrus rectus	0.7034079149862493	Supramodal
LatentSpace_v102	Orbital area	temporal pole	0.8214575526253527	Supramodal
LatentSpace_v102	Posterior parietal association areas	planum temporale	0.8783805639418933	Supramodal
LatentSpace_v102	Perirhinal area	parahippocampal gyrus	0.8416233289177976	Supramodal
LatentSpace_v102	Primary somatosensory area	transverse gyri	0.9683134868380725	Sensorimotor
LatentSpace_v102	Supplemental somatosensory area	inferior frontal gyrus	0.8906165812530306	Sensorimotor
LatentSpace_v102	Temporal association areas	inferior rostral gyrus	0.8748820121350595	Supramodal
LatentSpace_v102	Visual areas	planum temporale	0.9086713617391985	Sensorimotor
LatentSpace_v103	Anterior cingulate area	superior frontal gyrus	0.8912366302344861	Supramodal
LatentSpace_v103	Infralimbic area	paraterminal gyrus	0.8634466365374549	Supramodal
LatentSpace_v103	Retrosplenial area	paracentral lobule, posterior part	0.7829532497061056	Supramodal
LatentSpace_v103	Prelimbic area	gyrus rectus	0.9066203290014223	Supramodal
LatentSpace_v103	Primary auditory area	transverse gyri	0.8350963384323106	Sensorimotor
LatentSpace_v103	Dorsal auditory area	transverse gyri	0.893008885831148	Sensorimotor
LatentSpace_v103	Ventral auditory area	frontal pole	0.7421463288838337	Sensorimotor
LatentSpace_v103	Agranular insular area	claustrum	0.8219857976651385	Supramodal
LatentSpace_v103	Ectorhinal area	claustrum	0.8737277219110683	Supramodal
LatentSpace_v103	Primary motor area	paracentral lobule, anterior part	0.96977919600873	Sensorimotor
LatentSpace_v103	Secondary motor area	middle frontal gyrus	0.9542922717834257	Sensorimotor
LatentSpace_v103	Frontal pole, cerebral cortex	posterior orbital gyrus	0.834802813184732	Supramodal
LatentSpace_v103	Orbital area	gyrus rectus	0.8869527613366349	Supramodal
LatentSpace_v103	Posterior parietal association areas	planum temporale	0.888615668378573	Supramodal
LatentSpace_v103	Perirhinal area	parahippocampal gyrus	0.763491123691978	Supramodal
LatentSpace_v103	Primary somatosensory area	occipital pole	0.9571239221513356	Sensorimotor
LatentSpace_v103	Supplemental somatosensory area	transverse gyri	0.7675200851493013	Sensorimotor
LatentSpace_v103	Temporal association areas	posterior orbital gyrus	0.7380844736731054	Supramodal
LatentSpace_v103	Visual areas	transverse gyri	0.8976760926177574	Sensorimotor
LatentSpace_v104	Anterior cingulate area	middle frontal gyrus	0.8955594096173481	Supramodal
LatentSpace_v104	Infralimbic area	subiculum	0.8198499735382763	Supramodal
LatentSpace_v104	Retrosplenial area	planum temporale	0.7687048007158559	Supramodal
LatentSpace_v104	Prelimbic area	gyrus rectus	0.849370662597931	Supramodal
LatentSpace_v104	Primary auditory area	lateral orbital gyrus	0.9000365950872922	Sensorimotor
LatentSpace_v104	Dorsal auditory area	planum temporale	0.9256771207762409	Sensorimotor
LatentSpace_v104	Ventral auditory area	planum polare	0.8670554966711121	Sensorimotor
LatentSpace_v104	Agranular insular area	claustrum	0.8885987666516784	Supramodal
LatentSpace_v104	Ectorhinal area	claustrum	0.9430783835869594	Supramodal
LatentSpace_v104	Primary motor area	paracentral lobule, anterior part	0.9779912579381849	Sensorimotor
LatentSpace_v104	Secondary motor area	middle frontal gyrus	0.9376702000065934	Sensorimotor
LatentSpace_v104	Frontal pole, cerebral cortex	posterior orbital gyrus	0.8157584907040121	Supramodal
LatentSpace_v104	Orbital area	gyrus rectus	0.8649756789717581	Supramodal
LatentSpace_v104	Posterior parietal association areas	planum temporale	0.8709060987106427	Supramodal
LatentSpace_v104	Perirhinal area	parahippocampal gyrus	0.8696622599036471	Supramodal
LatentSpace_v104	Primary somatosensory area	transverse gyri	0.9713638856348179	Sensorimotor
LatentSpace_v104	Supplemental somatosensory area	middle temporal gyrus	0.87675118676814	Sensorimotor
LatentSpace_v104	Temporal association areas	insula	0.915327628574461	Supramodal
LatentSpace_v104	Visual areas	planum temporale	0.9150502637699747	Sensorimotor
LatentSpace_v105	Anterior cingulate area	cingulate gyrus	0.8769086442464491	Supramodal
LatentSpace_v105	Infralimbic area	paraterminal gyrus	0.850008086547954	Supramodal
LatentSpace_v105	Retrosplenial area	superior parietal lobule	0.7080342366436788	Supramodal
LatentSpace_v105	Prelimbic area	gyrus rectus	0.7887707914037607	Supramodal
LatentSpace_v105	Primary auditory area	paracentral lobule, posterior part	0.8732174548335839	Sensorimotor
LatentSpace_v105	Dorsal auditory area	planum temporale	0.9011658372130911	Sensorimotor
LatentSpace_v105	Ventral auditory area	lateral orbital gyrus	0.8303639977099514	Sensorimotor
LatentSpace_v105	Agranular insular area	gyrus rectus	0.808441186231712	Supramodal
LatentSpace_v105	Ectorhinal area	claustrum	0.8859025712993676	Supramodal
LatentSpace_v105	Primary motor area	paracentral lobule, anterior part	0.9360271787472053	Sensorimotor
LatentSpace_v105	Secondary motor area	superior frontal gyrus	0.852692661533724	Sensorimotor
LatentSpace_v105	Frontal pole, cerebral cortex	frontal pole	0.7042361468304466	Supramodal
LatentSpace_v105	Orbital area	gyrus rectus	0.8516401300783576	Supramodal
LatentSpace_v105	Posterior parietal association areas	planum temporale	0.8387463311741779	Supramodal
LatentSpace_v105	Perirhinal area	parahippocampal gyrus	0.7914422868043626	Supramodal
LatentSpace_v105	Primary somatosensory area	transverse gyri	0.9618901657799972	Sensorimotor
LatentSpace_v105	Supplemental somatosensory area	inferior frontal gyrus	0.8484887754089041	Sensorimotor
LatentSpace_v105	Temporal association areas	inferior temporal gyrus	0.824982154789415	Supramodal
LatentSpace_v105	Visual areas	planum temporale	0.8433380708883454	Sensorimotor
LatentSpace_v106	Anterior cingulate area	cingulate gyrus	0.9068853074232529	Supramodal
LatentSpace_v106	Infralimbic area	subiculum	0.8939821367425311	Supramodal
LatentSpace_v106	Retrosplenial area	planum temporale	0.7097222592129875	Supramodal
LatentSpace_v106	Prelimbic area	gyrus rectus	0.8872986627987277	Supramodal
[truncated: 7,501 more rows]
