# Supplementary material for: Whole-brain comparison of rodent and human brains using spatial transcriptomics
Source: eLife. 2022 Nov 7;11:e79418. doi: 10.7554/eLife.79418 (PMC9708081; doi:10.7554/eLife.79418)
Supplement: Figure 5—source data 2. [file elife-79418-fig5-data2.csv]

Data	MouseRegion	HumanRegion	Correlation
LatentSpace_v1	Anterior cingulate area	cingulate gyrus	0.8832941021459618
LatentSpace_v1	Anterior cingulate area	parahippocampal gyrus	0.6866862150853067
LatentSpace_v1	Anterior cingulate area	piriform cortex	0.19364256039502353
LatentSpace_v1	Anterior cingulate area	anterior orbital gyrus	0.8735571827583375
LatentSpace_v1	Anterior cingulate area	frontal operculum	0.8351662707542322
LatentSpace_v1	Anterior cingulate area	frontal pole	0.8669046771542462
LatentSpace_v1	Anterior cingulate area	gyrus rectus	0.8084051493246152
LatentSpace_v1	Anterior cingulate area	inferior frontal gyrus	0.8764072620450366
LatentSpace_v1	Anterior cingulate area	inferior rostral gyrus	0.8067887612338046
LatentSpace_v1	Anterior cingulate area	lateral orbital gyrus	0.8731650382536945
LatentSpace_v1	Anterior cingulate area	medial orbital gyrus	0.8387448710909051
LatentSpace_v1	Anterior cingulate area	middle frontal gyrus	0.90253931995227
LatentSpace_v1	Anterior cingulate area	paracentral lobule, anterior part	0.855817114928969
LatentSpace_v1	Anterior cingulate area	paraterminal gyrus	0.5208116900756663
LatentSpace_v1	Anterior cingulate area	parolfactory gyri	0.6616701793724935
LatentSpace_v1	Anterior cingulate area	posterior orbital gyrus	0.8304000135198274
LatentSpace_v1	Anterior cingulate area	precentral gyrus	0.8245537552156493
LatentSpace_v1	Anterior cingulate area	superior frontal gyrus	0.8961979257763828
LatentSpace_v1	Anterior cingulate area	superior rostral gyrus	0.8542088898651823
LatentSpace_v1	Anterior cingulate area	insula	0.7966368127817053
LatentSpace_v1	Anterior cingulate area	cuneus	0.7180999181968958
LatentSpace_v1	Anterior cingulate area	inferior occipital gyrus	0.8208117541539514
LatentSpace_v1	Anterior cingulate area	lingual gyrus	0.7125616784842694
LatentSpace_v1	Anterior cingulate area	occipital pole	0.7678652489654341
LatentSpace_v1	Anterior cingulate area	occipito-temporal gyrus	0.8543665333787545
LatentSpace_v1	Anterior cingulate area	superior occipital gyrus	0.8468756273604466
LatentSpace_v1	Anterior cingulate area	inferior parietal lobule	0.8909860005708534
LatentSpace_v1	Anterior cingulate area	paracentral lobule, posterior part	0.8803615954110303
LatentSpace_v1	Anterior cingulate area	postcentral gyrus	0.7987183611301106
LatentSpace_v1	Anterior cingulate area	precuneus	0.8873153448038336
LatentSpace_v1	Anterior cingulate area	superior parietal lobule	0.8573156712177697
LatentSpace_v1	Anterior cingulate area	fusiform gyrus	0.7938051541367048
LatentSpace_v1	Anterior cingulate area	Heschl's gyrus	0.8283184789211356
LatentSpace_v1	Anterior cingulate area	inferior temporal gyrus	0.8396702969410914
LatentSpace_v1	Anterior cingulate area	middle temporal gyrus	0.8612465511661448
LatentSpace_v1	Anterior cingulate area	planum polare	0.8248007766671382
LatentSpace_v1	Anterior cingulate area	planum temporale	0.871432772441434
LatentSpace_v1	Anterior cingulate area	superior temporal gyrus	0.8805322831508465
LatentSpace_v1	Anterior cingulate area	temporal pole	0.6937406101649853
LatentSpace_v1	Anterior cingulate area	transverse gyri	0.8127397380057212
LatentSpace_v1	Infralimbic area	cingulate gyrus	0.5756480221959537
LatentSpace_v1	Infralimbic area	parahippocampal gyrus	0.6893522603093508
LatentSpace_v1	Infralimbic area	piriform cortex	0.7261447107937019
LatentSpace_v1	Infralimbic area	anterior orbital gyrus	0.5716531968595423
LatentSpace_v1	Infralimbic area	frontal operculum	0.5439069695700721
LatentSpace_v1	Infralimbic area	frontal pole	0.46107847084658615
LatentSpace_v1	Infralimbic area	gyrus rectus	0.6155702667954526
LatentSpace_v1	Infralimbic area	inferior frontal gyrus	0.45777463381026134
LatentSpace_v1	Infralimbic area	inferior rostral gyrus	0.6317738581476301
LatentSpace_v1	Infralimbic area	lateral orbital gyrus	0.48650612255198195
LatentSpace_v1	Infralimbic area	medial orbital gyrus	0.6140179784861465
LatentSpace_v1	Infralimbic area	middle frontal gyrus	0.48074572125898624
LatentSpace_v1	Infralimbic area	paracentral lobule, anterior part	0.28284064278561827
LatentSpace_v1	Infralimbic area	paraterminal gyrus	0.8194750075469854
LatentSpace_v1	Infralimbic area	parolfactory gyri	0.7743473375619425
LatentSpace_v1	Infralimbic area	posterior orbital gyrus	0.534520817957779
LatentSpace_v1	Infralimbic area	precentral gyrus	0.2076863892254712
LatentSpace_v1	Infralimbic area	superior frontal gyrus	0.51141447528515
LatentSpace_v1	Infralimbic area	superior rostral gyrus	0.6195986637560523
LatentSpace_v1	Infralimbic area	insula	0.6016092487009124
LatentSpace_v1	Infralimbic area	cuneus	0.10411827281195501
LatentSpace_v1	Infralimbic area	inferior occipital gyrus	0.23199530123295506
LatentSpace_v1	Infralimbic area	lingual gyrus	0.09125302215865938
LatentSpace_v1	Infralimbic area	occipital pole	0.17298523892737364
LatentSpace_v1	Infralimbic area	occipito-temporal gyrus	0.3302935463876914
LatentSpace_v1	Infralimbic area	superior occipital gyrus	0.26738221255529127
LatentSpace_v1	Infralimbic area	inferior parietal lobule	0.4058143805884743
LatentSpace_v1	Infralimbic area	paracentral lobule, posterior part	0.3720806664606233
LatentSpace_v1	Infralimbic area	postcentral gyrus	0.1796743942326525
LatentSpace_v1	Infralimbic area	precuneus	0.35579660867862706
LatentSpace_v1	Infralimbic area	superior parietal lobule	0.2694595763149698
LatentSpace_v1	Infralimbic area	fusiform gyrus	0.603203206106271
LatentSpace_v1	Infralimbic area	Heschl's gyrus	0.2832929917463895
LatentSpace_v1	Infralimbic area	inferior temporal gyrus	0.5448148597290133
LatentSpace_v1	Infralimbic area	middle temporal gyrus	0.4731909398988647
LatentSpace_v1	Infralimbic area	planum polare	0.5801674390722676
LatentSpace_v1	Infralimbic area	planum temporale	0.34980638813275355
LatentSpace_v1	Infralimbic area	superior temporal gyrus	0.48332227036526876
LatentSpace_v1	Infralimbic area	temporal pole	0.677953439488778
LatentSpace_v1	Infralimbic area	transverse gyri	0.2377998934718033
LatentSpace_v1	Retrosplenial area	cingulate gyrus	0.6502643996867842
LatentSpace_v1	Retrosplenial area	parahippocampal gyrus	0.40935369499002944
LatentSpace_v1	Retrosplenial area	piriform cortex	-0.05446967505947366
LatentSpace_v1	Retrosplenial area	anterior orbital gyrus	0.6243925269714602
LatentSpace_v1	Retrosplenial area	frontal operculum	0.547844462696539
LatentSpace_v1	Retrosplenial area	frontal pole	0.6917543129377667
LatentSpace_v1	Retrosplenial area	gyrus rectus	0.508413403693845
LatentSpace_v1	Retrosplenial area	inferior frontal gyrus	0.660403784637777
LatentSpace_v1	Retrosplenial area	inferior rostral gyrus	0.5159116319974094
LatentSpace_v1	Retrosplenial area	lateral orbital gyrus	0.6742924453548336
LatentSpace_v1	Retrosplenial area	medial orbital gyrus	0.5542079917678236
LatentSpace_v1	Retrosplenial area	middle frontal gyrus	0.7081589701075903
LatentSpace_v1	Retrosplenial area	paracentral lobule, anterior part	0.7484117662622514
LatentSpace_v1	Retrosplenial area	paraterminal gyrus	0.3391074229130385
LatentSpace_v1	Retrosplenial area	parolfactory gyri	0.3116214549587027
LatentSpace_v1	Retrosplenial area	posterior orbital gyrus	0.5559105639616779
LatentSpace_v1	Retrosplenial area	precentral gyrus	0.7591292873006683
LatentSpace_v1	Retrosplenial area	superior frontal gyrus	0.6796592397342088
LatentSpace_v1	Retrosplenial area	superior rostral gyrus	0.581312659058493
LatentSpace_v1	Retrosplenial area	insula	0.49283836947884613
LatentSpace_v1	Retrosplenial area	cuneus	0.750132255269393
LatentSpace_v1	Retrosplenial area	inferior occipital gyrus	0.7470848632290943
LatentSpace_v1	Retrosplenial area	lingual gyrus	0.74562021058184
LatentSpace_v1	Retrosplenial area	occipital pole	0.7248000474953601
LatentSpace_v1	Retrosplenial area	occipito-temporal gyrus	0.721310862758322
LatentSpace_v1	Retrosplenial area	superior occipital gyrus	0.782051591982195
LatentSpace_v1	Retrosplenial area	inferior parietal lobule	0.7343984762516429
LatentSpace_v1	Retrosplenial area	paracentral lobule, posterior part	0.7753250298651575
LatentSpace_v1	Retrosplenial area	postcentral gyrus	0.7658456426993644
LatentSpace_v1	Retrosplenial area	precuneus	0.7723398990000188
LatentSpace_v1	Retrosplenial area	superior parietal lobule	0.7865254750182883
LatentSpace_v1	Retrosplenial area	fusiform gyrus	0.4888052115108073
LatentSpace_v1	Retrosplenial area	Heschl's gyrus	0.7204310721688757
LatentSpace_v1	Retrosplenial area	inferior temporal gyrus	0.5781733213544943
LatentSpace_v1	Retrosplenial area	middle temporal gyrus	0.6407795972851211
LatentSpace_v1	Retrosplenial area	planum polare	0.53472718562445
LatentSpace_v1	Retrosplenial area	planum temporale	0.7751064957628417
LatentSpace_v1	Retrosplenial area	superior temporal gyrus	0.6608513938059316
LatentSpace_v1	Retrosplenial area	temporal pole	0.3481339691226522
LatentSpace_v1	Retrosplenial area	transverse gyri	0.7389112520607866
LatentSpace_v1	Prelimbic area	cingulate gyrus	0.8865303712350776
LatentSpace_v1	Prelimbic area	parahippocampal gyrus	0.8031291103881837
LatentSpace_v1	Prelimbic area	piriform cortex	0.4231742726954025
LatentSpace_v1	Prelimbic area	anterior orbital gyrus	0.8809598135439368
LatentSpace_v1	Prelimbic area	frontal operculum	0.8563371961777123
LatentSpace_v1	Prelimbic area	frontal pole	0.8578849021143701
LatentSpace_v1	Prelimbic area	gyrus rectus	0.8757393116863852
LatentSpace_v1	Prelimbic area	inferior frontal gyrus	0.8183742971948303
LatentSpace_v1	Prelimbic area	inferior rostral gyrus	0.8743932118609126
LatentSpace_v1	Prelimbic area	lateral orbital gyrus	0.8409613689065695
LatentSpace_v1	Prelimbic area	medial orbital gyrus	0.883181772939082
LatentSpace_v1	Prelimbic area	middle frontal gyrus	0.840224626910936
LatentSpace_v1	Prelimbic area	paracentral lobule, anterior part	0.6932576843317264
LatentSpace_v1	Prelimbic area	paraterminal gyrus	0.6348414228229625
LatentSpace_v1	Prelimbic area	parolfactory gyri	0.7959458938609105
LatentSpace_v1	Prelimbic area	posterior orbital gyrus	0.8600711991468828
LatentSpace_v1	Prelimbic area	precentral gyrus	0.6416268926668002
LatentSpace_v1	Prelimbic area	superior frontal gyrus	0.8609639232863641
LatentSpace_v1	Prelimbic area	superior rostral gyrus	0.8852522076272457
LatentSpace_v1	Prelimbic area	insula	0.8535493165951528
LatentSpace_v1	Prelimbic area	cuneus	0.4803722611950459
LatentSpace_v1	Prelimbic area	inferior occipital gyrus	0.6530684100030278
LatentSpace_v1	Prelimbic area	lingual gyrus	0.4892727585830729
LatentSpace_v1	Prelimbic area	occipital pole	0.5510064227271203
LatentSpace_v1	Prelimbic area	occipito-temporal gyrus	0.7353251271555018
LatentSpace_v1	Prelimbic area	superior occipital gyrus	0.6707242325143095
LatentSpace_v1	Prelimbic area	inferior parietal lobule	0.795149464304963
LatentSpace_v1	Prelimbic area	paracentral lobule, posterior part	0.7492984068083419
LatentSpace_v1	Prelimbic area	postcentral gyrus	0.5909443762225095
LatentSpace_v1	Prelimbic area	precuneus	0.768955482678464
LatentSpace_v1	Prelimbic area	superior parietal lobule	0.701784572738283
LatentSpace_v1	Prelimbic area	fusiform gyrus	0.8463848847437093
LatentSpace_v1	Prelimbic area	Heschl's gyrus	0.6925468283504175
LatentSpace_v1	Prelimbic area	inferior temporal gyrus	0.8570250346344038
LatentSpace_v1	Prelimbic area	middle temporal gyrus	0.8344476310509934
LatentSpace_v1	Prelimbic area	planum polare	0.8472349068125631
LatentSpace_v1	Prelimbic area	planum temporale	0.7596629293830238
LatentSpace_v1	Prelimbic area	superior temporal gyrus	0.836451160773981
LatentSpace_v1	Prelimbic area	temporal pole	0.8166573443538393
LatentSpace_v1	Prelimbic area	transverse gyri	0.6611360576603268
LatentSpace_v1	Primary auditory area	cingulate gyrus	0.7902326295822003
LatentSpace_v1	Primary auditory area	parahippocampal gyrus	0.6268435850589584
LatentSpace_v1	Primary auditory area	piriform cortex	0.12353051770619683
LatentSpace_v1	Primary auditory area	anterior orbital gyrus	0.7917521078722196
LatentSpace_v1	Primary auditory area	frontal operculum	0.7749218402014025
LatentSpace_v1	Primary auditory area	frontal pole	0.8746842686722999
LatentSpace_v1	Primary auditory area	gyrus rectus	0.7363399132355567
LatentSpace_v1	Primary auditory area	inferior frontal gyrus	0.8269405033229363
LatentSpace_v1	Primary auditory area	inferior rostral gyrus	0.7249177669896685
LatentSpace_v1	Primary auditory area	lateral orbital gyrus	0.8560629896705639
LatentSpace_v1	Primary auditory area	medial orbital gyrus	0.7477115790174853
LatentSpace_v1	Primary auditory area	middle frontal gyrus	0.8148873573042442
LatentSpace_v1	Primary auditory area	paracentral lobule, anterior part	0.7818055568150336
LatentSpace_v1	Primary auditory area	paraterminal gyrus	0.3441387459451582
LatentSpace_v1	Primary auditory area	parolfactory gyri	0.4742459083876059
LatentSpace_v1	Primary auditory area	posterior orbital gyrus	0.7921044065034105
LatentSpace_v1	Primary auditory area	precentral gyrus	0.7769273533704939
LatentSpace_v1	Primary auditory area	superior frontal gyrus	0.8057491221450982
LatentSpace_v1	Primary auditory area	superior rostral gyrus	0.751933942972289
LatentSpace_v1	Primary auditory area	insula	0.746653183661869
LatentSpace_v1	Primary auditory area	cuneus	0.8158259842109611
LatentSpace_v1	Primary auditory area	inferior occipital gyrus	0.8545369005804151
LatentSpace_v1	Primary auditory area	lingual gyrus	0.8440796179593983
LatentSpace_v1	Primary auditory area	occipital pole	0.8557749664730602
LatentSpace_v1	Primary auditory area	occipito-temporal gyrus	0.874665898490294
LatentSpace_v1	Primary auditory area	superior occipital gyrus	0.8401041861595823
LatentSpace_v1	Primary auditory area	inferior parietal lobule	0.850602650944444
LatentSpace_v1	Primary auditory area	paracentral lobule, posterior part	0.8334442168626738
LatentSpace_v1	Primary auditory area	postcentral gyrus	0.7968194270965695
LatentSpace_v1	Primary auditory area	precuneus	0.86242340462795275
LatentSpace_v1	Primary auditory area	superior parietal lobule	0.8511825194920455
LatentSpace_v1	Primary auditory area	fusiform gyrus	0.7307162765466033
LatentSpace_v1	Primary auditory area	Heschl's gyrus	0.8827248490325255
LatentSpace_v1	Primary auditory area	inferior temporal gyrus	0.7995313407161815
LatentSpace_v1	Primary auditory area	middle temporal gyrus	0.8402284920801141
LatentSpace_v1	Primary auditory area	planum polare	0.756961968217729
LatentSpace_v1	Primary auditory area	planum temporale	0.8926828739970497
LatentSpace_v1	Primary auditory area	superior temporal gyrus	0.8217012589183171
LatentSpace_v1	Primary auditory area	temporal pole	0.605367787255839
LatentSpace_v1	Primary auditory area	transverse gyri	0.8819806548489577
LatentSpace_v1	Dorsal auditory area	cingulate gyrus	0.8014351078167291
LatentSpace_v1	Dorsal auditory area	parahippocampal gyrus	0.5938245332194837
LatentSpace_v1	Dorsal auditory area	piriform cortex	0.061814148204234136
LatentSpace_v1	Dorsal auditory area	anterior orbital gyrus	0.8012619862172855
LatentSpace_v1	Dorsal auditory area	frontal operculum	0.7777381332237089
LatentSpace_v1	Dorsal auditory area	frontal pole	0.8866505212286565
LatentSpace_v1	Dorsal auditory area	gyrus rectus	0.7253348545490719
LatentSpace_v1	Dorsal auditory area	inferior frontal gyrus	0.8493816608230239
LatentSpace_v1	Dorsal auditory area	inferior rostral gyrus	0.7115531120506494
LatentSpace_v1	Dorsal auditory area	lateral orbital gyrus	0.8712288557920693
LatentSpace_v1	Dorsal auditory area	medial orbital gyrus	0.7439851111332143
LatentSpace_v1	Dorsal auditory area	middle frontal gyrus	0.8406426380682885
LatentSpace_v1	Dorsal auditory area	paracentral lobule, anterior part	0.8397678058854031
LatentSpace_v1	Dorsal auditory area	paraterminal gyrus	0.3327992310167396
LatentSpace_v1	Dorsal auditory area	parolfactory gyri	0.45033886852815885
LatentSpace_v1	Dorsal auditory area	posterior orbital gyrus	0.7946184587533689
LatentSpace_v1	Dorsal auditory area	precentral gyrus	0.8382242791432315
LatentSpace_v1	Dorsal auditory area	superior frontal gyrus	0.8256909396288111
LatentSpace_v1	Dorsal auditory area	superior rostral gyrus	0.7537315806872289
LatentSpace_v1	Dorsal auditory area	insula	0.7361665810871415
LatentSpace_v1	Dorsal auditory area	cuneus	0.8737358250318958
LatentSpace_v1	Dorsal auditory area	inferior occipital gyrus	0.9028022386158758
LatentSpace_v1	Dorsal auditory area	lingual gyrus	0.8984150331027663
LatentSpace_v1	Dorsal auditory area	occipital pole	0.9018502347276744
LatentSpace_v1	Dorsal auditory area	occipito-temporal gyrus	0.9099853119528807
LatentSpace_v1	Dorsal auditory area	superior occipital gyrus	0.8926587567938773
LatentSpace_v1	Dorsal auditory area	inferior parietal lobule	0.8834524848135593
LatentSpace_v1	Dorsal auditory area	paracentral lobule, posterior part	0.8732756622754229
LatentSpace_v1	Dorsal auditory area	postcentral gyrus	0.8586713776025057
LatentSpace_v1	Dorsal auditory area	precuneus	0.9025170587291835
LatentSpace_v1	Dorsal auditory area	superior parietal lobule	0.9006431879152272
LatentSpace_v1	Dorsal auditory area	fusiform gyrus	0.7191204681800336
LatentSpace_v1	Dorsal auditory area	Heschl's gyrus	0.9207207135307912
LatentSpace_v1	Dorsal auditory area	inferior temporal gyrus	0.7995038842517277
LatentSpace_v1	Dorsal auditory area	middle temporal gyrus	0.8538032874072978
LatentSpace_v1	Dorsal auditory area	planum polare	0.7582029604636619
LatentSpace_v1	Dorsal auditory area	planum temporale	0.9272184296597005
LatentSpace_v1	Dorsal auditory area	superior temporal gyrus	0.8423667654000716
LatentSpace_v1	Dorsal auditory area	temporal pole	0.5733040610532053
LatentSpace_v1	Dorsal auditory area	transverse gyri	0.9280262527746524
LatentSpace_v1	Ventral auditory area	cingulate gyrus	0.7763731565443877
LatentSpace_v1	Ventral auditory area	parahippocampal gyrus	0.6832519059397342
LatentSpace_v1	Ventral auditory area	piriform cortex	0.24682043068340875
LatentSpace_v1	Ventral auditory area	anterior orbital gyrus	0.7824665932112815
LatentSpace_v1	Ventral auditory area	frontal operculum	0.7819983192334855
LatentSpace_v1	Ventral auditory area	frontal pole	0.8455919443891661
LatentSpace_v1	Ventral auditory area	gyrus rectus	0.7590754433416417
LatentSpace_v1	Ventral auditory area	inferior frontal gyrus	0.7995420406602178
LatentSpace_v1	Ventral auditory area	inferior rostral gyrus	0.7487760909199128
LatentSpace_v1	Ventral auditory area	lateral orbital gyrus	0.8324424178077596
LatentSpace_v1	Ventral auditory area	medial orbital gyrus	0.7591603621538788
LatentSpace_v1	Ventral auditory area	middle frontal gyrus	0.7769028952279092
LatentSpace_v1	Ventral auditory area	paracentral lobule, anterior part	0.7002495650406941
LatentSpace_v1	Ventral auditory area	paraterminal gyrus	0.3982106286057725
LatentSpace_v1	Ventral auditory area	parolfactory gyri	0.5382944937551735
LatentSpace_v1	Ventral auditory area	posterior orbital gyrus	0.7960698642887236
LatentSpace_v1	Ventral auditory area	precentral gyrus	0.6838104050005096
LatentSpace_v1	Ventral auditory area	superior frontal gyrus	0.7778128822249596
LatentSpace_v1	Ventral auditory area	superior rostral gyrus	0.7567935566669531
LatentSpace_v1	Ventral auditory area	insula	0.7738116139055312
LatentSpace_v1	Ventral auditory area	cuneus	0.7217682404376087
LatentSpace_v1	Ventral auditory area	inferior occipital gyrus	0.7781570247295293
LatentSpace_v1	Ventral auditory area	lingual gyrus	0.7522063839164962
LatentSpace_v1	Ventral auditory area	occipital pole	0.7794144655770697
LatentSpace_v1	Ventral auditory area	occipito-temporal gyrus	0.8209436279168577
LatentSpace_v1	Ventral auditory area	superior occipital gyrus	0.7566450514013618
LatentSpace_v1	Ventral auditory area	inferior parietal lobule	0.8002271015161615
LatentSpace_v1	Ventral auditory area	paracentral lobule, posterior part	0.7704087875533386
LatentSpace_v1	Ventral auditory area	postcentral gyrus	0.7019263471403411
LatentSpace_v1	Ventral auditory area	precuneus	0.7954339193480964
LatentSpace_v1	Ventral auditory area	superior parietal lobule	0.7690725892561072
LatentSpace_v1	Ventral auditory area	fusiform gyrus	0.7594531006742563
LatentSpace_v1	Ventral auditory area	Heschl's gyrus	0.8250279253099555
LatentSpace_v1	Ventral auditory area	inferior temporal gyrus	0.8041500396517529
LatentSpace_v1	Ventral auditory area	middle temporal gyrus	0.8229981964699571
LatentSpace_v1	Ventral auditory area	planum polare	0.7704753146800044
LatentSpace_v1	Ventral auditory area	planum temporale	0.8308429472011187
LatentSpace_v1	Ventral auditory area	superior temporal gyrus	0.796398081687944
LatentSpace_v1	Ventral auditory area	temporal pole	0.6670546880495459
LatentSpace_v1	Ventral auditory area	transverse gyri	0.8127774972620371
LatentSpace_v1	Agranular insular area	cingulate gyrus	0.7530908175367984
LatentSpace_v1	Agranular insular area	parahippocampal gyrus	0.7315651628182578
LatentSpace_v1	Agranular insular area	piriform cortex	0.4831805260435559
LatentSpace_v1	Agranular insular area	anterior orbital gyrus	0.7759416504075803
LatentSpace_v1	Agranular insular area	frontal operculum	0.7967177476670319
LatentSpace_v1	Agranular insular area	frontal pole	0.7503996689485579
LatentSpace_v1	Agranular insular area	gyrus rectus	0.8081268464419991
LatentSpace_v1	Agranular insular area	inferior frontal gyrus	0.7251123851872988
LatentSpace_v1	Agranular insular area	inferior rostral gyrus	0.7937434672181446
LatentSpace_v1	Agranular insular area	lateral orbital gyrus	0.7416358596154015
LatentSpace_v1	Agranular insular area	medial orbital gyrus	0.7950667340205957
LatentSpace_v1	Agranular insular area	middle frontal gyrus	0.7058676983277711
LatentSpace_v1	Agranular insular area	paracentral lobule, anterior part	0.5536568551669274
LatentSpace_v1	Agranular insular area	paraterminal gyrus	0.4699269416739056
LatentSpace_v1	Agranular insular area	parolfactory gyri	0.7263134024259148
LatentSpace_v1	Agranular insular area	posterior orbital gyrus	0.8152623365615665
LatentSpace_v1	Agranular insular area	precentral gyrus	0.5002190136159548
LatentSpace_v1	Agranular insular area	superior frontal gyrus	0.7340399345972546
LatentSpace_v1	Agranular insular area	superior rostral gyrus	0.7797047933769802
LatentSpace_v1	Agranular insular area	insula	0.8025124529801554
LatentSpace_v1	Agranular insular area	cuneus	0.36571139533355884
LatentSpace_v1	Agranular insular area	inferior occipital gyrus	0.5454171583011563
LatentSpace_v1	Agranular insular area	lingual gyrus	0.3834229311893928
LatentSpace_v1	Agranular insular area	occipital pole	0.4480459159418353
LatentSpace_v1	Agranular insular area	occipito-temporal gyrus	0.6322756262807385
LatentSpace_v1	Agranular insular area	superior occipital gyrus	0.5294366774350671
LatentSpace_v1	Agranular insular area	inferior parietal lobule	0.6656985069619666
LatentSpace_v1	Agranular insular area	paracentral lobule, posterior part	0.5944914803102689
LatentSpace_v1	Agranular insular area	postcentral gyrus	0.45615581673939937
LatentSpace_v1	Agranular insular area	precuneus	0.62482939201322
LatentSpace_v1	Agranular insular area	superior parietal lobule	0.557587743798015
LatentSpace_v1	Agranular insular area	fusiform gyrus	0.7898304416104991
LatentSpace_v1	Agranular insular area	Heschl's gyrus	0.6041904600166544
LatentSpace_v1	Agranular insular area	inferior temporal gyrus	0.7838023090819282
LatentSpace_v1	Agranular insular area	middle temporal gyrus	0.7524685301319753
LatentSpace_v1	Agranular insular area	planum polare	0.7876751337409952
LatentSpace_v1	Agranular insular area	planum temporale	0.619297031213411
LatentSpace_v1	Agranular insular area	superior temporal gyrus	0.7349863998077255
LatentSpace_v1	Agranular insular area	temporal pole	0.7833886262970275
LatentSpace_v1	Agranular insular area	transverse gyri	0.5564421771818248
LatentSpace_v1	Ectorhinal area	cingulate gyrus	0.7787176195183332
LatentSpace_v1	Ectorhinal area	parahippocampal gyrus	0.8148553555912502
LatentSpace_v1	Ectorhinal area	piriform cortex	0.5096816985059706
LatentSpace_v1	Ectorhinal area	anterior orbital gyrus	0.7929319326795652
LatentSpace_v1	Ectorhinal area	frontal operculum	0.8341341123744676
LatentSpace_v1	Ectorhinal area	frontal pole	0.7804704775252664
LatentSpace_v1	Ectorhinal area	gyrus rectus	0.8464230771173984
LatentSpace_v1	Ectorhinal area	inferior frontal gyrus	0.7509104726050991
LatentSpace_v1	Ectorhinal area	inferior rostral gyrus	0.8331004396080297
LatentSpace_v1	Ectorhinal area	lateral orbital gyrus	0.7751558172719623
LatentSpace_v1	Ectorhinal area	medial orbital gyrus	0.8216133727658927
LatentSpace_v1	Ectorhinal area	middle frontal gyrus	0.7140715581449543
LatentSpace_v1	Ectorhinal area	paracentral lobule, anterior part	0.5418969854645997
LatentSpace_v1	Ectorhinal area	paraterminal gyrus	0.5255613473150696
LatentSpace_v1	Ectorhinal area	parolfactory gyri	0.7522180674554816
LatentSpace_v1	Ectorhinal area	posterior orbital gyrus	0.837493116856318
LatentSpace_v1	Ectorhinal area	precentral gyrus	0.49062895217547425
LatentSpace_v1	Ectorhinal area	superior frontal gyrus	0.7458195740674317
LatentSpace_v1	Ectorhinal area	superior rostral gyrus	0.8035791696097966
LatentSpace_v1	Ectorhinal area	insula	0.8585141819842702
LatentSpace_v1	Ectorhinal area	cuneus	0.41896895684720614
LatentSpace_v1	Ectorhinal area	inferior occipital gyrus	0.5728182957719107
LatentSpace_v1	Ectorhinal area	lingual gyrus	0.44765128460746884
LatentSpace_v1	Ectorhinal area	occipital pole	0.5188548593879514
LatentSpace_v1	Ectorhinal area	occipito-temporal gyrus	0.6754693198470382
LatentSpace_v1	Ectorhinal area	superior occipital gyrus	0.5423606231935547
LatentSpace_v1	Ectorhinal area	inferior parietal lobule	0.6876792647820564
LatentSpace_v1	Ectorhinal area	paracentral lobule, posterior part	0.6117427013422705
LatentSpace_v1	Ectorhinal area	postcentral gyrus	0.46713099936013397
LatentSpace_v1	Ectorhinal area	precuneus	0.6386264091601213
LatentSpace_v1	Ectorhinal area	superior parietal lobule	0.5700228942049965
LatentSpace_v1	Ectorhinal area	fusiform gyrus	0.8502014348617478
LatentSpace_v1	Ectorhinal area	Heschl's gyrus	0.6525248556425518
LatentSpace_v1	Ectorhinal area	inferior temporal gyrus	0.8310459766588041
LatentSpace_v1	Ectorhinal area	middle temporal gyrus	0.79186707882638
LatentSpace_v1	Ectorhinal area	planum polare	0.8302918591621369
LatentSpace_v1	Ectorhinal area	planum temporale	0.6586043250139902
LatentSpace_v1	Ectorhinal area	superior temporal gyrus	0.7587008378302684
LatentSpace_v1	Ectorhinal area	temporal pole	0.8456399479589146
LatentSpace_v1	Ectorhinal area	transverse gyri	0.6121316610586899
LatentSpace_v1	Primary motor area	cingulate gyrus	0.8515346311096512
LatentSpace_v1	Primary motor area	parahippocampal gyrus	0.5757295459802828
LatentSpace_v1	Primary motor area	piriform cortex	0.014489867660046729
LatentSpace_v1	Primary motor area	anterior orbital gyrus	0.8624866674325867
LatentSpace_v1	Primary motor area	frontal operculum	0.8624289258267313
LatentSpace_v1	Primary motor area	frontal pole	0.8758443799563868
LatentSpace_v1	Primary motor area	gyrus rectus	0.7778242142762758
LatentSpace_v1	Primary motor area	inferior frontal gyrus	0.9322061290307019
LatentSpace_v1	Primary motor area	inferior rostral gyrus	0.7561239828114273
LatentSpace_v1	Primary motor area	lateral orbital gyrus	0.8953282710520387
LatentSpace_v1	Primary motor area	medial orbital gyrus	0.8059088345426302
LatentSpace_v1	Primary motor area	middle frontal gyrus	0.9211274395803762
LatentSpace_v1	Primary motor area	paracentral lobule, anterior part	0.9679501140254249
LatentSpace_v1	Primary motor area	paraterminal gyrus	0.3002374443396854
LatentSpace_v1	Primary motor area	parolfactory gyri	0.5457181173091463
LatentSpace_v1	Primary motor area	posterior orbital gyrus	0.8649278336273282
LatentSpace_v1	Primary motor area	precentral gyrus	0.9515341035331912
LatentSpace_v1	Primary motor area	superior frontal gyrus	0.9043865552823889
LatentSpace_v1	Primary motor area	superior rostral gyrus	0.8184587114068189
LatentSpace_v1	Primary motor area	insula	0.7882664633595939
LatentSpace_v1	Primary motor area	cuneus	0.8615644722846366
LatentSpace_v1	Primary motor area	inferior occipital gyrus	0.9463281864229033
LatentSpace_v1	Primary motor area	lingual gyrus	0.8594776886223567
LatentSpace_v1	Primary motor area	occipital pole	0.9012029059397767
LatentSpace_v1	Primary motor area	occipito-temporal gyrus	0.9506117662383636
LatentSpace_v1	Primary motor area	superior occipital gyrus	0.9402947264496673
LatentSpace_v1	Primary motor area	inferior parietal lobule	0.9429357921207435
LatentSpace_v1	Primary motor area	paracentral lobule, posterior part	0.9293464273779651
LatentSpace_v1	Primary motor area	postcentral gyrus	0.9312514736121478
LatentSpace_v1	Primary motor area	precuneus	0.9441810329191189
LatentSpace_v1	Primary motor area	superior parietal lobule	0.9451500168506953
LatentSpace_v1	Primary motor area	fusiform gyrus	0.783096902620085
LatentSpace_v1	Primary motor area	Heschl's gyrus	0.9455750005531773
LatentSpace_v1	Primary motor area	inferior temporal gyrus	0.8494061130102898
LatentSpace_v1	Primary motor area	middle temporal gyrus	0.9062726315025147
LatentSpace_v1	Primary motor area	planum polare	0.8414209523218709
LatentSpace_v1	Primary motor area	planum temporale	0.9231794169769704
LatentSpace_v1	Primary motor area	superior temporal gyrus	0.9211694657947866
LatentSpace_v1	Primary motor area	temporal pole	0.6261536743900157
LatentSpace_v1	Primary motor area	transverse gyri	0.9402364269516948
LatentSpace_v1	Secondary motor area	cingulate gyrus	0.8927916074349042
LatentSpace_v1	Secondary motor area	parahippocampal gyrus	0.6434096573866778
LatentSpace_v1	Secondary motor area	piriform cortex	0.09297374945934796
LatentSpace_v1	Secondary motor area	anterior orbital gyrus	0.8952207921936496
LatentSpace_v1	Secondary motor area	frontal operculum	0.8797776035488151
LatentSpace_v1	Secondary motor area	frontal pole	0.9041598198509186
LatentSpace_v1	Secondary motor area	gyrus rectus	0.8217892538212799
LatentSpace_v1	Secondary motor area	inferior frontal gyrus	0.9294934437961107
LatentSpace_v1	Secondary motor area	inferior rostral gyrus	0.8072646043582683
LatentSpace_v1	Secondary motor area	lateral orbital gyrus	0.9087838406907812
LatentSpace_v1	Secondary motor area	medial orbital gyrus	0.8495837835918552
LatentSpace_v1	Secondary motor area	middle frontal gyrus	0.9363991310211953
LatentSpace_v1	Secondary motor area	paracentral lobule, anterior part	0.9340256198651159
LatentSpace_v1	Secondary motor area	paraterminal gyrus	0.3861395213646275
LatentSpace_v1	Secondary motor area	parolfactory gyri	0.6174365802525492
LatentSpace_v1	Secondary motor area	posterior orbital gyrus	0.8827204258307298
LatentSpace_v1	Secondary motor area	precentral gyrus	0.9104630230437901
LatentSpace_v1	Secondary motor area	superior frontal gyrus	0.9275336537024973
LatentSpace_v1	Secondary motor area	superior rostral gyrus	0.8606931012848101
LatentSpace_v1	Secondary motor area	insula	0.8174836926305533
LatentSpace_v1	Secondary motor area	cuneus	0.7857717394432202
LatentSpace_v1	Secondary motor area	inferior occipital gyrus	0.8999371794288539
LatentSpace_v1	Secondary motor area	lingual gyrus	0.7854753320864932
LatentSpace_v1	Secondary motor area	occipital pole	0.8315488780165586
LatentSpace_v1	Secondary motor area	occipito-temporal gyrus	0.9218025637767907
LatentSpace_v1	Secondary motor area	superior occipital gyrus	0.9064934127700727
LatentSpace_v1	Secondary motor area	inferior parietal lobule	0.938791251844527
LatentSpace_v1	Secondary motor area	paracentral lobule, posterior part	0.9194571872125474
LatentSpace_v1	Secondary motor area	postcentral gyrus	0.8767675832490204
LatentSpace_v1	Secondary motor area	precuneus	0.9378883048832216
LatentSpace_v1	Secondary motor area	superior parietal lobule	0.9216298398590665
LatentSpace_v1	Secondary motor area	fusiform gyrus	0.8123674410903311
LatentSpace_v1	Secondary motor area	Heschl's gyrus	0.9033035250631848
LatentSpace_v1	Secondary motor area	inferior temporal gyrus	0.8719126731339547
LatentSpace_v1	Secondary motor area	middle temporal gyrus	0.911494270119321
LatentSpace_v1	Secondary motor area	planum polare	0.8574249930954472
LatentSpace_v1	Secondary motor area	planum temporale	0.9151618451340182
LatentSpace_v1	Secondary motor area	superior temporal gyrus	0.9269985838873744
LatentSpace_v1	Secondary motor area	temporal pole	0.6814899379142721
LatentSpace_v1	Secondary motor area	transverse gyri	0.8920836424964834
LatentSpace_v1	Frontal pole, cerebral cortex	cingulate gyrus	0.7982901028178074
LatentSpace_v1	Frontal pole, cerebral cortex	parahippocampal gyrus	0.6376159898632647
LatentSpace_v1	Frontal pole, cerebral cortex	piriform cortex	0.24527091749604857
LatentSpace_v1	Frontal pole, cerebral cortex	anterior orbital gyrus	0.810206703704366
LatentSpace_v1	Frontal pole, cerebral cortex	frontal operculum	0.7984364066228814
LatentSpace_v1	Frontal pole, cerebral cortex	frontal pole	0.8224296021291548
LatentSpace_v1	Frontal pole, cerebral cortex	gyrus rectus	0.7776067449624373
LatentSpace_v1	Frontal pole, cerebral cortex	inferior frontal gyrus	0.7961225610128998
LatentSpace_v1	Frontal pole, cerebral cortex	inferior rostral gyrus	0.761511559646191
LatentSpace_v1	Frontal pole, cerebral cortex	lateral orbital gyrus	0.8047142672784061
LatentSpace_v1	Frontal pole, cerebral cortex	medial orbital gyrus	0.7872425531541195
LatentSpace_v1	Frontal pole, cerebral cortex	middle frontal gyrus	0.7969899660060278
LatentSpace_v1	Frontal pole, cerebral cortex	paracentral lobule, anterior part	0.7309117606250877
LatentSpace_v1	Frontal pole, cerebral cortex	paraterminal gyrus	0.39673178766153494
LatentSpace_v1	Frontal pole, cerebral cortex	parolfactory gyri	0.6150852050042663
LatentSpace_v1	Frontal pole, cerebral cortex	posterior orbital gyrus	0.8205944705805764
LatentSpace_v1	Frontal pole, cerebral cortex	precentral gyrus	0.6979406653640812
LatentSpace_v1	Frontal pole, cerebral cortex	superior frontal gyrus	0.8057637739234402
LatentSpace_v1	Frontal pole, cerebral cortex	superior rostral gyrus	0.7873677542201878
LatentSpace_v1	Frontal pole, cerebral cortex	insula	0.765667748551372
LatentSpace_v1	Frontal pole, cerebral cortex	cuneus	0.5674536729515459
LatentSpace_v1	Frontal pole, cerebral cortex	inferior occipital gyrus	0.7114586921310694
LatentSpace_v1	Frontal pole, cerebral cortex	lingual gyrus	0.5802882732242953
LatentSpace_v1	Frontal pole, cerebral cortex	occipital pole	0.6130235976653227
LatentSpace_v1	Frontal pole, cerebral cortex	occipito-temporal gyrus	0.7563901599372979
LatentSpace_v1	Frontal pole, cerebral cortex	superior occipital gyrus	0.7097646597277
LatentSpace_v1	Frontal pole, cerebral cortex	inferior parietal lobule	0.7828229918769014
LatentSpace_v1	Frontal pole, cerebral cortex	paracentral lobule, posterior part	0.7377112403863378
LatentSpace_v1	Frontal pole, cerebral cortex	postcentral gyrus	0.6593156282083226
LatentSpace_v1	Frontal pole, cerebral cortex	precuneus	0.7723193008503451
LatentSpace_v1	Frontal pole, cerebral cortex	superior parietal lobule	0.7348551006285836
LatentSpace_v1	Frontal pole, cerebral cortex	fusiform gyrus	0.7508483411611672
LatentSpace_v1	Frontal pole, cerebral cortex	Heschl's gyrus	0.7369136285575747
LatentSpace_v1	Frontal pole, cerebral cortex	inferior temporal gyrus	0.7916787648531847
LatentSpace_v1	Frontal pole, cerebral cortex	middle temporal gyrus	0.8045433923571801
LatentSpace_v1	Frontal pole, cerebral cortex	planum polare	0.7797439442840447
LatentSpace_v1	Frontal pole, cerebral cortex	planum temporale	0.7594000755793195
LatentSpace_v1	Frontal pole, cerebral cortex	superior temporal gyrus	0.8026479863921887
LatentSpace_v1	Frontal pole, cerebral cortex	temporal pole	0.6756601561982469
LatentSpace_v1	Frontal pole, cerebral cortex	transverse gyri	0.713497406504087
LatentSpace_v1	Orbital area	cingulate gyrus	0.8445506735444955
LatentSpace_v1	Orbital area	parahippocampal gyrus	0.8364871525330728
LatentSpace_v1	Orbital area	piriform cortex	0.5854206064026363
LatentSpace_v1	Orbital area	anterior orbital gyrus	0.8592662587174261
LatentSpace_v1	Orbital area	frontal operculum	0.8623973442410532
LatentSpace_v1	Orbital area	frontal pole	0.8068944238504204
LatentSpace_v1	Orbital area	gyrus rectus	0.8925052498363596
LatentSpace_v1	Orbital area	inferior frontal gyrus	0.7843323126563145
LatentSpace_v1	Orbital area	inferior rostral gyrus	0.8848522638281933
LatentSpace_v1	Orbital area	lateral orbital gyrus	0.8067934597751658
LatentSpace_v1	Orbital area	medial orbital gyrus	0.8844885625268376
LatentSpace_v1	Orbital area	middle frontal gyrus	0.7796937236025897
LatentSpace_v1	Orbital area	paracentral lobule, anterior part	0.5939168491306648
LatentSpace_v1	Orbital area	paraterminal gyrus	0.6403765968331407
LatentSpace_v1	Orbital area	parolfactory gyri	0.854200926214788
LatentSpace_v1	Orbital area	posterior orbital gyrus	0.8711666287965498
LatentSpace_v1	Orbital area	precentral gyrus	0.5265995029327781
LatentSpace_v1	Orbital area	superior frontal gyrus	0.8101030719684058
LatentSpace_v1	Orbital area	superior rostral gyrus	0.8752003679872091
LatentSpace_v1	Orbital area	insula	0.8811388353219488
LatentSpace_v1	Orbital area	cuneus	0.3857381056763766
LatentSpace_v1	Orbital area	inferior occipital gyrus	0.571548142007282
LatentSpace_v1	Orbital area	lingual gyrus	0.3968242119205822
LatentSpace_v1	Orbital area	occipital pole	0.48280350847990966
LatentSpace_v1	Orbital area	occipito-temporal gyrus	0.6724848752540706
LatentSpace_v1	Orbital area	superior occipital gyrus	0.5745652936209871
LatentSpace_v1	Orbital area	inferior parietal lobule	0.7251190293349264
LatentSpace_v1	Orbital area	paracentral lobule, posterior part	0.6547017689500507
LatentSpace_v1	Orbital area	postcentral gyrus	0.4834878178554195
LatentSpace_v1	Orbital area	precuneus	0.6792669134988369
LatentSpace_v1	Orbital area	superior parietal lobule	0.5964498182086174
LatentSpace_v1	Orbital area	fusiform gyrus	0.8699006749465887
LatentSpace_v1	Orbital area	Heschl's gyrus	0.6336591459593227
LatentSpace_v1	Orbital area	inferior temporal gyrus	0.8527619667556152
LatentSpace_v1	Orbital area	middle temporal gyrus	0.807739389239016
LatentSpace_v1	Orbital area	planum polare	0.8622049635179092
LatentSpace_v1	Orbital area	planum temporale	0.6714143523658125
LatentSpace_v1	Orbital area	superior temporal gyrus	0.7995594020339167
LatentSpace_v1	Orbital area	temporal pole	0.8785099813224446
LatentSpace_v1	Orbital area	transverse gyri	0.5806363480260541
LatentSpace_v1	Posterior parietal association areas	cingulate gyrus	0.7849274147420909
LatentSpace_v1	Posterior parietal association areas	parahippocampal gyrus	0.5542983307202217
LatentSpace_v1	Posterior parietal association areas	piriform cortex	0.04013206862540002
LatentSpace_v1	Posterior parietal association areas	anterior orbital gyrus	0.7655325147651773
LatentSpace_v1	Posterior parietal association areas	frontal operculum	0.7069102087521327
LatentSpace_v1	Posterior parietal association areas	frontal pole	0.8418350729674288
LatentSpace_v1	Posterior parietal association areas	gyrus rectus	0.6735236574391334
LatentSpace_v1	Posterior parietal association areas	inferior frontal gyrus	0.7808545121167337
LatentSpace_v1	Posterior parietal association areas	inferior rostral gyrus	0.6677099850320323
LatentSpace_v1	Posterior parietal association areas	lateral orbital gyrus	0.8109406420723729
LatentSpace_v1	Posterior parietal association areas	medial orbital gyrus	0.7048529739064099
LatentSpace_v1	Posterior parietal association areas	middle frontal gyrus	0.8090155252595711
LatentSpace_v1	Posterior parietal association areas	paracentral lobule, anterior part	0.803425896638008
LatentSpace_v1	Posterior parietal association areas	paraterminal gyrus	0.39727266113613763
LatentSpace_v1	Posterior parietal association areas	parolfactory gyri	0.44619231863327125
LatentSpace_v1	Posterior parietal association areas	posterior orbital gyrus	0.7213392433618053
LatentSpace_v1	Posterior parietal association areas	precentral gyrus	0.8006404909610685
LatentSpace_v1	Posterior parietal association areas	superior frontal gyrus	0.7954944102801016
LatentSpace_v1	Posterior parietal association areas	superior rostral gyrus	0.7222009138715826
LatentSpace_v1	Posterior parietal association areas	insula	0.6611017329248996
LatentSpace_v1	Posterior parietal association areas	cuneus	0.7762532169536676
LatentSpace_v1	Posterior parietal association areas	inferior occipital gyrus	0.819929519697724
LatentSpace_v1	Posterior parietal association areas	lingual gyrus	0.7918547084030837
LatentSpace_v1	Posterior parietal association areas	occipital pole	0.7799617488644448
LatentSpace_v1	Posterior parietal association areas	occipito-temporal gyrus	0.82381110805064
LatentSpace_v1	Posterior parietal association areas	superior occipital gyrus	0.8401209227921559
LatentSpace_v1	Posterior parietal association areas	inferior parietal lobule	0.8331608638975284
LatentSpace_v1	Posterior parietal association areas	paracentral lobule, posterior part	0.8293690390244047
LatentSpace_v1	Posterior parietal association areas	postcentral gyrus	0.8024088814879433
LatentSpace_v1	Posterior parietal association areas	precuneus	0.8621105874117122
LatentSpace_v1	Posterior parietal association areas	superior parietal lobule	0.8555636073099644
LatentSpace_v1	Posterior parietal association areas	fusiform gyrus	0.6457767024573787
LatentSpace_v1	Posterior parietal association areas	Heschl's gyrus	0.8192177146232135
LatentSpace_v1	Posterior parietal association areas	inferior temporal gyrus	0.7298246674954697
LatentSpace_v1	Posterior parietal association areas	middle temporal gyrus	0.780112636576685
LatentSpace_v1	Posterior parietal association areas	planum polare	0.6863152585448282
LatentSpace_v1	Posterior parietal association areas	planum temporale	0.8703236911769778
LatentSpace_v1	Posterior parietal association areas	superior temporal gyrus	0.7844729774660797
LatentSpace_v1	Posterior parietal association areas	temporal pole	0.5155135714546262
LatentSpace_v1	Posterior parietal association areas	transverse gyri	0.8338612874518395
LatentSpace_v1	Perirhinal area	cingulate gyrus	0.6479890264994747
LatentSpace_v1	Perirhinal area	parahippocampal gyrus	0.7865143846760093
LatentSpace_v1	Perirhinal area	piriform cortex	0.5872943446359804
LatentSpace_v1	Perirhinal area	anterior orbital gyrus	0.6488296079022206
LatentSpace_v1	Perirhinal area	frontal operculum	0.6765706364092201
LatentSpace_v1	Perirhinal area	frontal pole	0.6568946651217434
LatentSpace_v1	Perirhinal area	gyrus rectus	0.7281819349169032
LatentSpace_v1	Perirhinal area	inferior frontal gyrus	0.5744601476874563
LatentSpace_v1	Perirhinal area	inferior rostral gyrus	0.7330829664554688
LatentSpace_v1	Perirhinal area	lateral orbital gyrus	0.6273707565963833
LatentSpace_v1	Perirhinal area	medial orbital gyrus	0.6977335732412653
LatentSpace_v1	Perirhinal area	middle frontal gyrus	0.5567099093382536
LatentSpace_v1	Perirhinal area	paracentral lobule, anterior part	0.33167417905862195
LatentSpace_v1	Perirhinal area	paraterminal gyrus	0.5352262256963553
LatentSpace_v1	Perirhinal area	parolfactory gyri	0.6813778853284943
LatentSpace_v1	Perirhinal area	posterior orbital gyrus	0.6819681989643747
LatentSpace_v1	Perirhinal area	precentral gyrus	0.29052953372385054
LatentSpace_v1	Perirhinal area	superior frontal gyrus	0.5938514639512144
LatentSpace_v1	Perirhinal area	superior rostral gyrus	0.673741869826781
LatentSpace_v1	Perirhinal area	insula	0.7272668229585164
LatentSpace_v1	Perirhinal area	cuneus	0.24072241392434152
LatentSpace_v1	Perirhinal area	inferior occipital gyrus	0.3809230204693741
LatentSpace_v1	Perirhinal area	lingual gyrus	0.27478106646741746
LatentSpace_v1	Perirhinal area	occipital pole	0.32956171159956343
LatentSpace_v1	Perirhinal area	occipito-temporal gyrus	0.4924768191624157
LatentSpace_v1	Perirhinal area	superior occipital gyrus	0.35604629252407355
LatentSpace_v1	Perirhinal area	inferior parietal lobule	0.5162884135348655
LatentSpace_v1	Perirhinal area	paracentral lobule, posterior part	0.4557622453124689
LatentSpace_v1	Perirhinal area	postcentral gyrus	0.267296182912773
LatentSpace_v1	Perirhinal area	precuneus	0.4708050642986087
LatentSpace_v1	Perirhinal area	superior parietal lobule	0.3939867174984341
LatentSpace_v1	Perirhinal area	fusiform gyrus	0.7258347170503286
LatentSpace_v1	Perirhinal area	Heschl's gyrus	0.4632028341090226
LatentSpace_v1	Perirhinal area	inferior temporal gyrus	0.6942180804562503
LatentSpace_v1	Perirhinal area	middle temporal gyrus	0.6326439252297723
LatentSpace_v1	Perirhinal area	planum polare	0.6733222858478107
LatentSpace_v1	Perirhinal area	planum temporale	0.5071250394376597
LatentSpace_v1	Perirhinal area	superior temporal gyrus	0.5890610445263097
LatentSpace_v1	Perirhinal area	temporal pole	0.7658024395783934
LatentSpace_v1	Perirhinal area	transverse gyri	0.4220983663019447
LatentSpace_v1	Primary somatosensory area	cingulate gyrus	0.7596299334180519
LatentSpace_v1	Primary somatosensory area	parahippocampal gyrus	0.4831303084767234
LatentSpace_v1	Primary somatosensory area	piriform cortex	-0.05673925115658027
LatentSpace_v1	Primary somatosensory area	anterior orbital gyrus	0.7731004692674348
LatentSpace_v1	Primary somatosensory area	frontal operculum	0.774097772179408
LatentSpace_v1	Primary somatosensory area	frontal pole	0.8191789549985626
LatentSpace_v1	Primary somatosensory area	gyrus rectus	0.6762711468101507
LatentSpace_v1	Primary somatosensory area	inferior frontal gyrus	0.8703509618244778
LatentSpace_v1	Primary somatosensory area	inferior rostral gyrus	0.6516421434152205
LatentSpace_v1	Primary somatosensory area	lateral orbital gyrus	0.8414183309149186
LatentSpace_v1	Primary somatosensory area	medial orbital gyrus	0.7033299546125277
LatentSpace_v1	Primary somatosensory area	middle frontal gyrus	0.8452202183891329
LatentSpace_v1	Primary somatosensory area	paracentral lobule, anterior part	0.930011316885663
LatentSpace_v1	Primary somatosensory area	paraterminal gyrus	0.21891790841162237
LatentSpace_v1	Primary somatosensory area	parolfactory gyri	0.40657938956167267
LatentSpace_v1	Primary somatosensory area	posterior orbital gyrus	0.7823990291893378
LatentSpace_v1	Primary somatosensory area	precentral gyrus	0.9282642647856852
LatentSpace_v1	Primary somatosensory area	superior frontal gyrus	0.8193012393761246
LatentSpace_v1	Primary somatosensory area	superior rostral gyrus	0.7177472508722409
LatentSpace_v1	Primary somatosensory area	insula	0.7008606895581049
LatentSpace_v1	Primary somatosensory area	cuneus	0.9329254939714723
LatentSpace_v1	Primary somatosensory area	inferior occipital gyrus	0.9538489329723914
LatentSpace_v1	Primary somatosensory area	lingual gyrus	0.9372097798992904
LatentSpace_v1	Primary somatosensory area	occipital pole	0.9531781465451379
LatentSpace_v1	Primary somatosensory area	occipito-temporal gyrus	0.9361151385731075
LatentSpace_v1	Primary somatosensory area	superior occipital gyrus	0.9375789084833525
LatentSpace_v1	Primary somatosensory area	inferior parietal lobule	0.8967386802765471
LatentSpace_v1	Primary somatosensory area	paracentral lobule, posterior part	0.8935910854172415
LatentSpace_v1	Primary somatosensory area	postcentral gyrus	0.9424264738733212
LatentSpace_v1	Primary somatosensory area	precuneus	0.9100401514692837
LatentSpace_v1	Primary somatosensory area	superior parietal lobule	0.9301251872891997
LatentSpace_v1	Primary somatosensory area	fusiform gyrus	0.6913099047747671
LatentSpace_v1	Primary somatosensory area	Heschl's gyrus	0.9527930754867466
LatentSpace_v1	Primary somatosensory area	inferior temporal gyrus	0.7711189598021924
LatentSpace_v1	Primary somatosensory area	middle temporal gyrus	0.8465970417456459
LatentSpace_v1	Primary somatosensory area	planum polare	0.7577740447196804
LatentSpace_v1	Primary somatosensory area	planum temporale	0.9079623894565223
LatentSpace_v1	Primary somatosensory area	superior temporal gyrus	0.8524792646674804
LatentSpace_v1	Primary somatosensory area	temporal pole	0.5133231068287519
LatentSpace_v1	Primary somatosensory area	transverse gyri	0.959564367851995
LatentSpace_v1	Supplemental somatosensory area	cingulate gyrus	0.744971430577677
LatentSpace_v1	Supplemental somatosensory area	parahippocampal gyrus	0.605611199011991
LatentSpace_v1	Supplemental somatosensory area	piriform cortex	0.16890791788883872
LatentSpace_v1	Supplemental somatosensory area	anterior orbital gyrus	0.7660315500975131
LatentSpace_v1	Supplemental somatosensory area	frontal operculum	0.79805690702468
LatentSpace_v1	Supplemental somatosensory area	frontal pole	0.7904672604171201
LatentSpace_v1	Supplemental somatosensory area	gyrus rectus	0.7374798565113396
LatentSpace_v1	Supplemental somatosensory area	inferior frontal gyrus	0.8177612179784913
LatentSpace_v1	Supplemental somatosensory area	inferior rostral gyrus	0.7122512308192843
LatentSpace_v1	Supplemental somatosensory area	lateral orbital gyrus	0.8073876337853944
LatentSpace_v1	Supplemental somatosensory area	medial orbital gyrus	0.7374172378544688
LatentSpace_v1	Supplemental somatosensory area	middle frontal gyrus	0.7716110578206558
LatentSpace_v1	Supplemental somatosensory area	paracentral lobule, anterior part	0.7565671482307705
LatentSpace_v1	Supplemental somatosensory area	paraterminal gyrus	0.30529825656839915
LatentSpace_v1	Supplemental somatosensory area	parolfactory gyri	0.5262820982179849
LatentSpace_v1	Supplemental somatosensory area	posterior orbital gyrus	0.8046283431769348
LatentSpace_v1	Supplemental somatosensory area	precentral gyrus	0.7342136896379763
LatentSpace_v1	Supplemental somatosensory area	superior frontal gyrus	0.7699044833587709
LatentSpace_v1	Supplemental somatosensory area	superior rostral gyrus	0.7360656867415953
LatentSpace_v1	Supplemental somatosensory area	insula	0.7669266261938977
LatentSpace_v1	Supplemental somatosensory area	cuneus	0.7316825344531577
LatentSpace_v1	Supplemental somatosensory area	inferior occipital gyrus	0.7997916456829121
LatentSpace_v1	Supplemental somatosensory area	lingual gyrus	0.7499038522592825
LatentSpace_v1	Supplemental somatosensory area	occipital pole	0.7907013020657556
LatentSpace_v1	Supplemental somatosensory area	occipito-temporal gyrus	0.8324338008742921
LatentSpace_v1	Supplemental somatosensory area	superior occipital gyrus	0.7660776930922862
LatentSpace_v1	Supplemental somatosensory area	inferior parietal lobule	0.7995532768753334
LatentSpace_v1	Supplemental somatosensory area	paracentral lobule, posterior part	0.7601372342778718
LatentSpace_v1	Supplemental somatosensory area	postcentral gyrus	0.7411804663252306
LatentSpace_v1	Supplemental somatosensory area	precuneus	0.7832619489808283
LatentSpace_v1	Supplemental somatosensory area	superior parietal lobule	0.7700139884335875
LatentSpace_v1	Supplemental somatosensory area	fusiform gyrus	0.7558731588557456
LatentSpace_v1	Supplemental somatosensory area	Heschl's gyrus	0.8407680597512289
LatentSpace_v1	Supplemental somatosensory area	inferior temporal gyrus	0.7923694782187909
LatentSpace_v1	Supplemental somatosensory area	middle temporal gyrus	0.8230199701786653
LatentSpace_v1	Supplemental somatosensory area	planum polare	0.788208819249221
LatentSpace_v1	Supplemental somatosensory area	planum temporale	0.7962882295124156
LatentSpace_v1	Supplemental somatosensory area	superior temporal gyrus	0.8062772233487615
LatentSpace_v1	Supplemental somatosensory area	temporal pole	0.6453086781236024
LatentSpace_v1	Supplemental somatosensory area	transverse gyri	0.8273680025814659
LatentSpace_v1	Temporal association areas	cingulate gyrus	0.7886804938418812
LatentSpace_v1	Temporal association areas	parahippocampal gyrus	0.7652929157856381
LatentSpace_v1	Temporal association areas	piriform cortex	0.37810182789117125
LatentSpace_v1	Temporal association areas	anterior orbital gyrus	0.7902425529807264
LatentSpace_v1	Temporal association areas	frontal operculum	0.7961030350151863
LatentSpace_v1	Temporal association areas	frontal pole	0.8391653872126815
LatentSpace_v1	Temporal association areas	gyrus rectus	0.8025941848484517
LatentSpace_v1	Temporal association areas	inferior frontal gyrus	0.7641943985470002
LatentSpace_v1	Temporal association areas	inferior rostral gyrus	0.793198226553213
LatentSpace_v1	Temporal association areas	lateral orbital gyrus	0.8126150677434305
LatentSpace_v1	Temporal association areas	medial orbital gyrus	0.7892893325774445
LatentSpace_v1	Temporal association areas	middle frontal gyrus	0.7424410231771874
LatentSpace_v1	Temporal association areas	paracentral lobule, anterior part	0.6039675823298333
LatentSpace_v1	Temporal association areas	paraterminal gyrus	0.5008732067416287
LatentSpace_v1	Temporal association areas	parolfactory gyri	0.6311102405585368
LatentSpace_v1	Temporal association areas	posterior orbital gyrus	0.8085288057465749
LatentSpace_v1	Temporal association areas	precentral gyrus	0.574198496716298
LatentSpace_v1	Temporal association areas	superior frontal gyrus	0.760491453502538
LatentSpace_v1	Temporal association areas	superior rostral gyrus	0.7811730696793658
LatentSpace_v1	Temporal association areas	insula	0.8115288807812421
LatentSpace_v1	Temporal association areas	cuneus	0.5750106881952253
LatentSpace_v1	Temporal association areas	inferior occipital gyrus	0.6727432299870663
LatentSpace_v1	Temporal association areas	lingual gyrus	0.613192112516659
LatentSpace_v1	Temporal association areas	occipital pole	0.6465471075938999
LatentSpace_v1	Temporal association areas	occipito-temporal gyrus	0.7475156308253449
LatentSpace_v1	Temporal association areas	superior occipital gyrus	0.6504267282706127
LatentSpace_v1	Temporal association areas	inferior parietal lobule	0.7446709764874682
LatentSpace_v1	Temporal association areas	paracentral lobule, posterior part	0.6921913332250086
LatentSpace_v1	Temporal association areas	postcentral gyrus	0.5769975811153522
LatentSpace_v1	Temporal association areas	precuneus	0.7253594307036161
LatentSpace_v1	Temporal association areas	superior parietal lobule	0.6758379451405604
LatentSpace_v1	Temporal association areas	fusiform gyrus	0.7953317920859659
LatentSpace_v1	Temporal association areas	Heschl's gyrus	0.739541844640993
LatentSpace_v1	Temporal association areas	inferior temporal gyrus	0.8158302543135586
LatentSpace_v1	Temporal association areas	middle temporal gyrus	0.8059867472556927
LatentSpace_v1	Temporal association areas	planum polare	0.7871162773914183
LatentSpace_v1	Temporal association areas	planum temporale	0.7653271297129763
LatentSpace_v1	Temporal association areas	superior temporal gyrus	0.7707289675746325
LatentSpace_v1	Temporal association areas	temporal pole	0.7479082911160309
LatentSpace_v1	Temporal association areas	transverse gyri	0.7213297401801928
LatentSpace_v1	Visual areas	cingulate gyrus	0.7501635429230291
LatentSpace_v1	Visual areas	parahippocampal gyrus	0.5123649167178098
LatentSpace_v1	Visual areas	piriform cortex	-0.0096578964598093
LatentSpace_v1	Visual areas	anterior orbital gyrus	0.7384650742476421
LatentSpace_v1	Visual areas	frontal operculum	0.6939185448685732
LatentSpace_v1	Visual areas	frontal pole	0.8419958566807152
LatentSpace_v1	Visual areas	gyrus rectus	0.6462363131746014
LatentSpace_v1	Visual areas	inferior frontal gyrus	0.7748345380529393
LatentSpace_v1	Visual areas	inferior rostral gyrus	0.6317524188776772
LatentSpace_v1	Visual areas	lateral orbital gyrus	0.8097722877640677
LatentSpace_v1	Visual areas	medial orbital gyrus	0.6707366331821156
LatentSpace_v1	Visual areas	middle frontal gyrus	0.7819784151653094
LatentSpace_v1	Visual areas	paracentral lobule, anterior part	0.7978435786885245
LatentSpace_v1	Visual areas	paraterminal gyrus	0.31389356095060955
LatentSpace_v1	Visual areas	parolfactory gyri	0.3722829012824279
LatentSpace_v1	Visual areas	posterior orbital gyrus	0.7146673534803636
LatentSpace_v1	Visual areas	precentral gyrus	0.8040964518736187
LatentSpace_v1	Visual areas	superior frontal gyrus	0.7654859127710448
LatentSpace_v1	Visual areas	superior rostral gyrus	0.6849249006112759
LatentSpace_v1	Visual areas	insula	0.6470500843254785
LatentSpace_v1	Visual areas	cuneus	0.837097885289031
LatentSpace_v1	Visual areas	inferior occipital gyrus	0.8533050036067602
LatentSpace_v1	Visual areas	lingual gyrus	0.864746357814332
LatentSpace_v1	Visual areas	occipital pole	0.8407755189159969
LatentSpace_v1	Visual areas	occipito-temporal gyrus	0.847871037185838
LatentSpace_v1	Visual areas	superior occipital gyrus	0.8562989127593116
LatentSpace_v1	Visual areas	inferior parietal lobule	0.8287354516697403
LatentSpace_v1	Visual areas	paracentral lobule, posterior part	0.8164987239639441
LatentSpace_v1	Visual areas	postcentral gyrus	0.8255630452975141
LatentSpace_v1	Visual areas	precuneus	0.8636237393943001
LatentSpace_v1	Visual areas	superior parietal lobule	0.866806331715511
LatentSpace_v1	Visual areas	fusiform gyrus	0.6234555353842575
LatentSpace_v1	Visual areas	Heschl's gyrus	0.858920643205384
LatentSpace_v1	Visual areas	inferior temporal gyrus	0.7172048260325077
LatentSpace_v1	Visual areas	middle temporal gyrus	0.7794107815301854
LatentSpace_v1	Visual areas	planum polare	0.6696000646134147
LatentSpace_v1	Visual areas	planum temporale	0.8854354668908191
LatentSpace_v1	Visual areas	superior temporal gyrus	0.771789043558033
LatentSpace_v1	Visual areas	temporal pole	0.47778786450135363
LatentSpace_v1	Visual areas	transverse gyri	0.8803563101948771
LatentSpace_v2	Anterior cingulate area	cingulate gyrus	0.87756932743905
LatentSpace_v2	Anterior cingulate area	parahippocampal gyrus	0.6611709733547564
LatentSpace_v2	Anterior cingulate area	piriform cortex	0.22142807324572386
LatentSpace_v2	Anterior cingulate area	anterior orbital gyrus	0.8666190023587564
LatentSpace_v2	Anterior cingulate area	frontal operculum	0.8397222858505722
LatentSpace_v2	Anterior cingulate area	frontal pole	0.8957182276640329
LatentSpace_v2	Anterior cingulate area	gyrus rectus	0.823946572725382
LatentSpace_v2	Anterior cingulate area	inferior frontal gyrus	0.8553711360496599
LatentSpace_v2	Anterior cingulate area	inferior rostral gyrus	0.8206129495966186
LatentSpace_v2	Anterior cingulate area	lateral orbital gyrus	0.8638072130915533
LatentSpace_v2	Anterior cingulate area	medial orbital gyrus	0.8487733598978201
LatentSpace_v2	Anterior cingulate area	middle frontal gyrus	0.8786644911040048
LatentSpace_v2	Anterior cingulate area	paracentral lobule, anterior part	0.7948675482726528
LatentSpace_v2	Anterior cingulate area	paraterminal gyrus	0.5863507717585404
LatentSpace_v2	Anterior cingulate area	parolfactory gyri	0.6640478394116165
LatentSpace_v2	Anterior cingulate area	posterior orbital gyrus	0.8331192944035783
LatentSpace_v2	Anterior cingulate area	precentral gyrus	0.779143997944395
LatentSpace_v2	Anterior cingulate area	superior frontal gyrus	0.8824814712672717
LatentSpace_v2	Anterior cingulate area	superior rostral gyrus	0.8505620822516601
LatentSpace_v2	Anterior cingulate area	insula	0.7932539708888511
LatentSpace_v2	Anterior cingulate area	cuneus	0.684644910033863
LatentSpace_v2	Anterior cingulate area	inferior occipital gyrus	0.7702009619681148
LatentSpace_v2	Anterior cingulate area	lingual gyrus	0.6861299674350947
LatentSpace_v2	Anterior cingulate area	occipital pole	0.7055988647791259
LatentSpace_v2	Anterior cingulate area	occipito-temporal gyrus	0.8237419288737
LatentSpace_v2	Anterior cingulate area	superior occipital gyrus	0.781585532004021
LatentSpace_v2	Anterior cingulate area	inferior parietal lobule	0.8429984198738703
LatentSpace_v2	Anterior cingulate area	paracentral lobule, posterior part	0.7966788145171075
LatentSpace_v2	Anterior cingulate area	postcentral gyrus	0.7392688740678032
LatentSpace_v2	Anterior cingulate area	precuneus	0.8448690567573213
LatentSpace_v2	Anterior cingulate area	superior parietal lobule	0.7997344612472679
LatentSpace_v2	Anterior cingulate area	fusiform gyrus	0.7756559846117629
LatentSpace_v2	Anterior cingulate area	Heschl's gyrus	0.8017758888900232
LatentSpace_v2	Anterior cingulate area	inferior temporal gyrus	0.8290162808110467
LatentSpace_v2	Anterior cingulate area	middle temporal gyrus	0.8491083404166868
LatentSpace_v2	Anterior cingulate area	planum polare	0.8032220754104755
LatentSpace_v2	Anterior cingulate area	planum temporale	0.8531741493886659
LatentSpace_v2	Anterior cingulate area	superior temporal gyrus	0.8502894213287606
LatentSpace_v2	Anterior cingulate area	temporal pole	0.6943040765979756
LatentSpace_v2	Anterior cingulate area	transverse gyri	0.7879137666537814
LatentSpace_v2	Infralimbic area	cingulate gyrus	0.48647178167637123
LatentSpace_v2	Infralimbic area	parahippocampal gyrus	0.6466115107243123
LatentSpace_v2	Infralimbic area	piriform cortex	0.6956737986265619
LatentSpace_v2	Infralimbic area	anterior orbital gyrus	0.48570790329090635
LatentSpace_v2	Infralimbic area	frontal operculum	0.4689466659181423
LatentSpace_v2	Infralimbic area	frontal pole	0.39487435450270814
LatentSpace_v2	Infralimbic area	gyrus rectus	0.5492694361712224
LatentSpace_v2	Infralimbic area	inferior frontal gyrus	0.3427886478873206
LatentSpace_v2	Infralimbic area	inferior rostral gyrus	0.5420407003946716
LatentSpace_v2	Infralimbic area	lateral orbital gyrus	0.3942645363240074
LatentSpace_v2	Infralimbic area	medial orbital gyrus	0.5271251721833208
LatentSpace_v2	Infralimbic area	middle frontal gyrus	0.34519525057383116
LatentSpace_v2	Infralimbic area	paracentral lobule, anterior part	0.16212527095424836
LatentSpace_v2	Infralimbic area	paraterminal gyrus	0.759708493918297
LatentSpace_v2	Infralimbic area	parolfactory gyri	0.7330871219618009
LatentSpace_v2	Infralimbic area	posterior orbital gyrus	0.4856523653347987
LatentSpace_v2	Infralimbic area	precentral gyrus	0.11999104577518888
LatentSpace_v2	Infralimbic area	superior frontal gyrus	0.3911717908184436
LatentSpace_v2	Infralimbic area	superior rostral gyrus	0.5412577093615748
LatentSpace_v2	Infralimbic area	insula	0.5418022755691025
LatentSpace_v2	Infralimbic area	cuneus	0.05247907807034942
LatentSpace_v2	Infralimbic area	inferior occipital gyrus	0.14427464791505423
LatentSpace_v2	Infralimbic area	lingual gyrus	0.03887460318111654
LatentSpace_v2	Infralimbic area	occipital pole	0.05514450060348004
LatentSpace_v2	Infralimbic area	occipito-temporal gyrus	0.2475907314884534
LatentSpace_v2	Infralimbic area	superior occipital gyrus	0.16531689527525517
LatentSpace_v2	Infralimbic area	inferior parietal lobule	0.2821420635691661
LatentSpace_v2	Infralimbic area	paracentral lobule, posterior part	0.20389819132496484
LatentSpace_v2	Infralimbic area	postcentral gyrus	0.09228309777143259
LatentSpace_v2	Infralimbic area	precuneus	0.24481873010027252
LatentSpace_v2	Infralimbic area	superior parietal lobule	0.15491515764326552
LatentSpace_v2	Infralimbic area	fusiform gyrus	0.5436795701475906
LatentSpace_v2	Infralimbic area	Heschl's gyrus	0.22117277419175513
LatentSpace_v2	Infralimbic area	inferior temporal gyrus	0.4621874807576334
LatentSpace_v2	Infralimbic area	middle temporal gyrus	0.39669272560627505
LatentSpace_v2	Infralimbic area	planum polare	0.5198366973265603
LatentSpace_v2	Infralimbic area	planum temporale	0.2590352582537053
LatentSpace_v2	Infralimbic area	superior temporal gyrus	0.38450628852025664
LatentSpace_v2	Infralimbic area	temporal pole	0.6374120362695633
LatentSpace_v2	Infralimbic area	transverse gyri	0.17771031963276473
LatentSpace_v2	Retrosplenial area	cingulate gyrus	0.59535086628861
LatentSpace_v2	Retrosplenial area	parahippocampal gyrus	0.35116697601480973
LatentSpace_v2	Retrosplenial area	piriform cortex	0.0336353102608625
LatentSpace_v2	Retrosplenial area	anterior orbital gyrus	0.5680964989612671
LatentSpace_v2	Retrosplenial area	frontal operculum	0.5221687874582406
LatentSpace_v2	Retrosplenial area	frontal pole	0.6496972840945137
LatentSpace_v2	Retrosplenial area	gyrus rectus	0.48063523250726253
LatentSpace_v2	Retrosplenial area	inferior frontal gyrus	0.6185491250332273
LatentSpace_v2	Retrosplenial area	inferior rostral gyrus	0.5075377920237003
LatentSpace_v2	Retrosplenial area	lateral orbital gyrus	0.6112368211530332
LatentSpace_v2	Retrosplenial area	medial orbital gyrus	0.5288253602629048
LatentSpace_v2	Retrosplenial area	middle frontal gyrus	0.6736584597993024
LatentSpace_v2	Retrosplenial area	paracentral lobule, anterior part	0.6808420806723715
LatentSpace_v2	Retrosplenial area	paraterminal gyrus	0.400522575319372
LatentSpace_v2	Retrosplenial area	parolfactory gyri	0.3046436426154454
LatentSpace_v2	Retrosplenial area	posterior orbital gyrus	0.49999107301317225
LatentSpace_v2	Retrosplenial area	precentral gyrus	0.6926977126953169
LatentSpace_v2	Retrosplenial area	superior frontal gyrus	0.6386571230493545
LatentSpace_v2	Retrosplenial area	superior rostral gyrus	0.5378230235904498
LatentSpace_v2	Retrosplenial area	insula	0.4585280341609435
LatentSpace_v2	Retrosplenial area	cuneus	0.6807790948347764
LatentSpace_v2	Retrosplenial area	inferior occipital gyrus	0.6721398202004996
LatentSpace_v2	Retrosplenial area	lingual gyrus	0.6719410947314475
LatentSpace_v2	Retrosplenial area	occipital pole	0.6576731616376904
LatentSpace_v2	Retrosplenial area	occipito-temporal gyrus	0.6470252590150661
LatentSpace_v2	Retrosplenial area	superior occipital gyrus	0.6942176242456186
LatentSpace_v2	Retrosplenial area	inferior parietal lobule	0.6688295581921215
LatentSpace_v2	Retrosplenial area	paracentral lobule, posterior part	0.7348568471071428
LatentSpace_v2	Retrosplenial area	postcentral gyrus	0.6745137973471195
LatentSpace_v2	Retrosplenial area	precuneus	0.7012804586360125
LatentSpace_v2	Retrosplenial area	superior parietal lobule	0.7033154586048144
LatentSpace_v2	Retrosplenial area	fusiform gyrus	0.4299759617970143
LatentSpace_v2	Retrosplenial area	Heschl's gyrus	0.6612658930251232
LatentSpace_v2	Retrosplenial area	inferior temporal gyrus	0.5306651918845716
LatentSpace_v2	Retrosplenial area	middle temporal gyrus	0.5793041165460776
LatentSpace_v2	Retrosplenial area	planum polare	0.4650116294712335
LatentSpace_v2	Retrosplenial area	planum temporale	0.7360112786825567
LatentSpace_v2	Retrosplenial area	superior temporal gyrus	0.6007114659997298
LatentSpace_v2	Retrosplenial area	temporal pole	0.3245218530635662
LatentSpace_v2	Retrosplenial area	transverse gyri	0.6454594614213507
LatentSpace_v2	Prelimbic area	cingulate gyrus	0.835489862044425
LatentSpace_v2	Prelimbic area	parahippocampal gyrus	0.8038815490264074
LatentSpace_v2	Prelimbic area	piriform cortex	0.47720380535648677
LatentSpace_v2	Prelimbic area	anterior orbital gyrus	0.8268996562868489
LatentSpace_v2	Prelimbic area	frontal operculum	0.8152395389498003
LatentSpace_v2	Prelimbic area	frontal pole	0.8055282889032528
LatentSpace_v2	Prelimbic area	gyrus rectus	0.8635646025257795
LatentSpace_v2	Prelimbic area	inferior frontal gyrus	0.7256207394871406
LatentSpace_v2	Prelimbic area	inferior rostral gyrus	0.8525929568248263
LatentSpace_v2	Prelimbic area	lateral orbital gyrus	0.7648037465584732
LatentSpace_v2	Prelimbic area	medial orbital gyrus	0.8535190205832837
LatentSpace_v2	Prelimbic area	middle frontal gyrus	0.7331421989601824
LatentSpace_v2	Prelimbic area	paracentral lobule, anterior part	0.5513232399246011
LatentSpace_v2	Prelimbic area	paraterminal gyrus	0.734701702215827
LatentSpace_v2	Prelimbic area	parolfactory gyri	0.846691912783124
LatentSpace_v2	Prelimbic area	posterior orbital gyrus	0.8202089126862686
LatentSpace_v2	Prelimbic area	precentral gyrus	0.5130756230697041
LatentSpace_v2	Prelimbic area	superior frontal gyrus	0.7744700174884948
LatentSpace_v2	Prelimbic area	superior rostral gyrus	0.852556871791496
LatentSpace_v2	Prelimbic area	insula	0.8311420867128542
LatentSpace_v2	Prelimbic area	cuneus	0.3816724581430402
LatentSpace_v2	Prelimbic area	inferior occipital gyrus	0.5198404281634956
LatentSpace_v2	Prelimbic area	lingual gyrus	0.3905179915608879
LatentSpace_v2	Prelimbic area	occipital pole	0.42351842287119146
LatentSpace_v2	Prelimbic area	occipito-temporal gyrus	0.6336042224569607
LatentSpace_v2	Prelimbic area	superior occipital gyrus	0.527508431459557
LatentSpace_v2	Prelimbic area	inferior parietal lobule	0.666910500303387
LatentSpace_v2	Prelimbic area	paracentral lobule, posterior part	0.56667044205048
LatentSpace_v2	Prelimbic area	postcentral gyrus	0.4633839639124871
LatentSpace_v2	Prelimbic area	precuneus	0.638956974891516
LatentSpace_v2	Prelimbic area	superior parietal lobule	0.5512406190224275
LatentSpace_v2	Prelimbic area	fusiform gyrus	0.8236452750516647
LatentSpace_v2	Prelimbic area	Heschl's gyrus	0.5881198985127606
LatentSpace_v2	Prelimbic area	inferior temporal gyrus	0.8038335750441871
LatentSpace_v2	Prelimbic area	middle temporal gyrus	0.7663570887828398
LatentSpace_v2	Prelimbic area	planum polare	0.8091111053766645
LatentSpace_v2	Prelimbic area	planum temporale	0.6478751820464448
LatentSpace_v2	Prelimbic area	superior temporal gyrus	0.7479756636961421
LatentSpace_v2	Prelimbic area	temporal pole	0.8350608028739245
LatentSpace_v2	Prelimbic area	transverse gyri	0.5641570171416382
LatentSpace_v2	Primary auditory area	cingulate gyrus	0.8291581421325848
LatentSpace_v2	Primary auditory area	parahippocampal gyrus	0.6017272693002271
LatentSpace_v2	Primary auditory area	piriform cortex	0.16701593743440799
LatentSpace_v2	Primary auditory area	anterior orbital gyrus	0.8220816473021023
LatentSpace_v2	Primary auditory area	frontal operculum	0.8235587969175252
LatentSpace_v2	Primary auditory area	frontal pole	0.8653658004387534
LatentSpace_v2	Primary auditory area	gyrus rectus	0.7655599836375013
LatentSpace_v2	Primary auditory area	inferior frontal gyrus	0.8761391479074845
LatentSpace_v2	Primary auditory area	inferior rostral gyrus	0.7823949849428019
LatentSpace_v2	Primary auditory area	lateral orbital gyrus	0.8683924632112963
LatentSpace_v2	Primary auditory area	medial orbital gyrus	0.7943538210727966
LatentSpace_v2	Primary auditory area	middle frontal gyrus	0.8767631572148447
LatentSpace_v2	Primary auditory area	paracentral lobule, anterior part	0.8369770772347193
LatentSpace_v2	Primary auditory area	paraterminal gyrus	0.3927177243940266
LatentSpace_v2	Primary auditory area	parolfactory gyri	0.5060944213546565
LatentSpace_v2	Primary auditory area	posterior orbital gyrus	0.7955741200602358
LatentSpace_v2	Primary auditory area	precentral gyrus	0.817311471735488
LatentSpace_v2	Primary auditory area	superior frontal gyrus	0.8657446832244408
LatentSpace_v2	Primary auditory area	superior rostral gyrus	0.7881446036011953
LatentSpace_v2	Primary auditory area	insula	0.7714708330324404
LatentSpace_v2	Primary auditory area	cuneus	0.805925716729569
LatentSpace_v2	Primary auditory area	inferior occipital gyrus	0.8524915347589479
LatentSpace_v2	Primary auditory area	lingual gyrus	0.8309479272413477
LatentSpace_v2	Primary auditory area	occipital pole	0.8524645108465555
LatentSpace_v2	Primary auditory area	occipito-temporal gyrus	0.8730550676990516
LatentSpace_v2	Primary auditory area	superior occipital gyrus	0.8459161043295629
LatentSpace_v2	Primary auditory area	inferior parietal lobule	0.8888427222819568
LatentSpace_v2	Primary auditory area	paracentral lobule, posterior part	0.8980783068820036
LatentSpace_v2	Primary auditory area	postcentral gyrus	0.8147012064446182
LatentSpace_v2	Primary auditory area	precuneus	0.8797466269459304
LatentSpace_v2	Primary auditory area	superior parietal lobule	0.8694093088215418
LatentSpace_v2	Primary auditory area	fusiform gyrus	0.7576783970678869
LatentSpace_v2	Primary auditory area	Heschl's gyrus	0.8700842296433324
LatentSpace_v2	Primary auditory area	inferior temporal gyrus	0.8378256084350109
LatentSpace_v2	Primary auditory area	middle temporal gyrus	0.8608626503681571
LatentSpace_v2	Primary auditory area	planum polare	0.7796381543816758
LatentSpace_v2	Primary auditory area	planum temporale	0.8956833820265615
LatentSpace_v2	Primary auditory area	superior temporal gyrus	0.8670940215895628
LatentSpace_v2	Primary auditory area	temporal pole	0.6229770200729441
LatentSpace_v2	Primary auditory area	transverse gyri	0.8708517171085652
LatentSpace_v2	Dorsal auditory area	cingulate gyrus	0.844409723387513
LatentSpace_v2	Dorsal auditory area	parahippocampal gyrus	0.5719303286722612
LatentSpace_v2	Dorsal auditory area	piriform cortex	0.1125557015500157
LatentSpace_v2	Dorsal auditory area	anterior orbital gyrus	0.8391482339115771
LatentSpace_v2	Dorsal auditory area	frontal operculum	0.8349339418743573
LatentSpace_v2	Dorsal auditory area	frontal pole	0.8905604252038974
LatentSpace_v2	Dorsal auditory area	gyrus rectus	0.7676618131217137
LatentSpace_v2	Dorsal auditory area	inferior frontal gyrus	0.904627530772235
LatentSpace_v2	Dorsal auditory area	inferior rostral gyrus	0.7795940416378938
LatentSpace_v2	Dorsal auditory area	lateral orbital gyrus	0.8917145106727657
LatentSpace_v2	Dorsal auditory area	medial orbital gyrus	0.8022918806493952
LatentSpace_v2	Dorsal auditory area	middle frontal gyrus	0.908106008473582
LatentSpace_v2	Dorsal auditory area	paracentral lobule, anterior part	0.8903939631582792
LatentSpace_v2	Dorsal auditory area	paraterminal gyrus	0.3809639525764461
LatentSpace_v2	Dorsal auditory area	parolfactory gyri	0.4893342149886431
LatentSpace_v2	Dorsal auditory area	posterior orbital gyrus	0.8101235541852911
LatentSpace_v2	Dorsal auditory area	precentral gyrus	0.8749515053313232
LatentSpace_v2	Dorsal auditory area	superior frontal gyrus	0.8916601146334499
LatentSpace_v2	Dorsal auditory area	superior rostral gyrus	0.7987334155452331
LatentSpace_v2	Dorsal auditory area	insula	0.7684742355595909
LatentSpace_v2	Dorsal auditory area	cuneus	0.8618705574824373
LatentSpace_v2	Dorsal auditory area	inferior occipital gyrus	0.9018649453299434
LatentSpace_v2	Dorsal auditory area	lingual gyrus	0.8830029493975682
LatentSpace_v2	Dorsal auditory area	occipital pole	0.9023948281479073
LatentSpace_v2	Dorsal auditory area	occipito-temporal gyrus	0.9131321009859821
LatentSpace_v2	Dorsal auditory area	superior occipital gyrus	0.8969162352588427
LatentSpace_v2	Dorsal auditory area	inferior parietal lobule	0.9231358908958298
LatentSpace_v2	Dorsal auditory area	paracentral lobule, posterior part	0.9329176884327655
LatentSpace_v2	Dorsal auditory area	postcentral gyrus	0.8718123164855622
LatentSpace_v2	Dorsal auditory area	precuneus	0.9219903782720065
LatentSpace_v2	Dorsal auditory area	superior parietal lobule	0.9168802957813729
LatentSpace_v2	Dorsal auditory area	fusiform gyrus	0.7518888232749046
LatentSpace_v2	Dorsal auditory area	Heschl's gyrus	0.9127468384814967
LatentSpace_v2	Dorsal auditory area	inferior temporal gyrus	0.8439894682294801
LatentSpace_v2	Dorsal auditory area	middle temporal gyrus	0.8811424290329102
LatentSpace_v2	Dorsal auditory area	planum polare	0.7862728037948267
LatentSpace_v2	Dorsal auditory area	planum temporale	0.9337207668882035
LatentSpace_v2	Dorsal auditory area	superior temporal gyrus	0.8901733871984966
LatentSpace_v2	Dorsal auditory area	temporal pole	0.6017594869220494
LatentSpace_v2	Dorsal auditory area	transverse gyri	0.9157144235226824
LatentSpace_v2	Ventral auditory area	cingulate gyrus	0.8007295888309666
LatentSpace_v2	Ventral auditory area	parahippocampal gyrus	0.6429921432521606
LatentSpace_v2	Ventral auditory area	piriform cortex	0.2660738114494291
LatentSpace_v2	Ventral auditory area	anterior orbital gyrus	0.7947120385961022
LatentSpace_v2	Ventral auditory area	frontal operculum	0.8073982927471296
LatentSpace_v2	Ventral auditory area	frontal pole	0.8137365453560534
LatentSpace_v2	Ventral auditory area	gyrus rectus	0.7618432261312911
LatentSpace_v2	Ventral auditory area	inferior frontal gyrus	0.8290771673324274
LatentSpace_v2	Ventral auditory area	inferior rostral gyrus	0.7823154451031303
LatentSpace_v2	Ventral auditory area	lateral orbital gyrus	0.8271948805830536
LatentSpace_v2	Ventral auditory area	medial orbital gyrus	0.7802166328855865
LatentSpace_v2	Ventral auditory area	middle frontal gyrus	0.820254909064995
LatentSpace_v2	Ventral auditory area	paracentral lobule, anterior part	0.7524060823793409
LatentSpace_v2	Ventral auditory area	paraterminal gyrus	0.41992593364517755
LatentSpace_v2	Ventral auditory area	parolfactory gyri	0.5435671013578491
LatentSpace_v2	Ventral auditory area	posterior orbital gyrus	0.776866352894792
LatentSpace_v2	Ventral auditory area	precentral gyrus	0.7234612853639112
LatentSpace_v2	Ventral auditory area	superior frontal gyrus	0.8195530326169582
LatentSpace_v2	Ventral auditory area	superior rostral gyrus	0.7735972874292442
LatentSpace_v2	Ventral auditory area	insula	0.7789521805078014
LatentSpace_v2	Ventral auditory area	cuneus	0.7162334630678917
LatentSpace_v2	Ventral auditory area	inferior occipital gyrus	0.7717455299282202
LatentSpace_v2	Ventral auditory area	lingual gyrus	0.744713220890681
LatentSpace_v2	Ventral auditory area	occipital pole	0.7695920226038958
LatentSpace_v2	Ventral auditory area	occipito-temporal gyrus	0.807286828665219
LatentSpace_v2	Ventral auditory area	superior occipital gyrus	0.7627392344205772
LatentSpace_v2	Ventral auditory area	inferior parietal lobule	0.8300999376828387
LatentSpace_v2	Ventral auditory area	paracentral lobule, posterior part	0.8341700100460978
LatentSpace_v2	Ventral auditory area	postcentral gyrus	0.7232124187725208
LatentSpace_v2	Ventral auditory area	precuneus	0.8060027253532028
LatentSpace_v2	Ventral auditory area	superior parietal lobule	0.7870442034202086
LatentSpace_v2	Ventral auditory area	fusiform gyrus	0.770384766039264
LatentSpace_v2	Ventral auditory area	Heschl's gyrus	0.8015215961403862
LatentSpace_v2	Ventral auditory area	inferior temporal gyrus	0.8262548176670176
LatentSpace_v2	Ventral auditory area	middle temporal gyrus	0.8273203081185863
LatentSpace_v2	Ventral auditory area	planum polare	0.7766522669823496
LatentSpace_v2	Ventral auditory area	planum temporale	0.8239595437603611
LatentSpace_v2	Ventral auditory area	superior temporal gyrus	0.8302826431146051
LatentSpace_v2	Ventral auditory area	temporal pole	0.6595855879667785
LatentSpace_v2	Ventral auditory area	transverse gyri	0.7986538610623887
LatentSpace_v2	Agranular insular area	cingulate gyrus	0.8156176236210964
LatentSpace_v2	Agranular insular area	parahippocampal gyrus	0.8018888131133274
LatentSpace_v2	Agranular insular area	piriform cortex	0.5111437996871369
LatentSpace_v2	Agranular insular area	anterior orbital gyrus	0.834373033156355
LatentSpace_v2	Agranular insular area	frontal operculum	0.851365876729806
LatentSpace_v2	Agranular insular area	frontal pole	0.7688070009090281
LatentSpace_v2	Agranular insular area	gyrus rectus	0.8763931529509915
LatentSpace_v2	Agranular insular area	inferior frontal gyrus	0.7467821746770037
LatentSpace_v2	Agranular insular area	inferior rostral gyrus	0.8495406224566074
LatentSpace_v2	Agranular insular area	lateral orbital gyrus	0.7771832583345162
LatentSpace_v2	Agranular insular area	medial orbital gyrus	0.8577830591188602
LatentSpace_v2	Agranular insular area	middle frontal gyrus	0.7154400458911331
LatentSpace_v2	Agranular insular area	paracentral lobule, anterior part	0.5505211827919908
LatentSpace_v2	Agranular insular area	paraterminal gyrus	0.587953587538062
LatentSpace_v2	Agranular insular area	parolfactory gyri	0.8464388412523526
LatentSpace_v2	Agranular insular area	posterior orbital gyrus	0.8721390236344365
LatentSpace_v2	Agranular insular area	precentral gyrus	0.4957212707492887
LatentSpace_v2	Agranular insular area	superior frontal gyrus	0.7644044453909408
LatentSpace_v2	Agranular insular area	superior rostral gyrus	0.8547081147552339
LatentSpace_v2	Agranular insular area	insula	0.8702842273304936
LatentSpace_v2	Agranular insular area	cuneus	0.3924810273507015
LatentSpace_v2	Agranular insular area	inferior occipital gyrus	0.535185694303116
LatentSpace_v2	Agranular insular area	lingual gyrus	0.40680552714657703
LatentSpace_v2	Agranular insular area	occipital pole	0.4454152038860339
LatentSpace_v2	Agranular insular area	occipito-temporal gyrus	0.6558759507033343
LatentSpace_v2	Agranular insular area	superior occipital gyrus	0.5295931008270979
LatentSpace_v2	Agranular insular area	inferior parietal lobule	0.6742854659889487
LatentSpace_v2	Agranular insular area	paracentral lobule, posterior part	0.5477950898764342
LatentSpace_v2	Agranular insular area	postcentral gyrus	0.4691733237112597
LatentSpace_v2	Agranular insular area	precuneus	0.6229848098877865
LatentSpace_v2	Agranular insular area	superior parietal lobule	0.5383672888770568
LatentSpace_v2	Agranular insular area	fusiform gyrus	0.8780457547220167
LatentSpace_v2	Agranular insular area	Heschl's gyrus	0.6111194714607927
LatentSpace_v2	Agranular insular area	inferior temporal gyrus	0.8386920370643846
LatentSpace_v2	Agranular insular area	middle temporal gyrus	0.8001979825743614
LatentSpace_v2	Agranular insular area	planum polare	0.8729888921763441
LatentSpace_v2	Agranular insular area	planum temporale	0.6075123142590185
LatentSpace_v2	Agranular insular area	superior temporal gyrus	0.7779928878831068
LatentSpace_v2	Agranular insular area	temporal pole	0.868549244558967
LatentSpace_v2	Agranular insular area	transverse gyri	0.5887244040690963
LatentSpace_v2	Ectorhinal area	cingulate gyrus	0.8291342460221022
LatentSpace_v2	Ectorhinal area	parahippocampal gyrus	0.8494655791964687
LatentSpace_v2	Ectorhinal area	piriform cortex	0.5710348644274367
LatentSpace_v2	Ectorhinal area	anterior orbital gyrus	0.8261072947646219
LatentSpace_v2	Ectorhinal area	frontal operculum	0.861185278726301
LatentSpace_v2	Ectorhinal area	frontal pole	0.768902871009618
LatentSpace_v2	Ectorhinal area	gyrus rectus	0.8760844465929702
LatentSpace_v2	Ectorhinal area	inferior frontal gyrus	0.7585876899191133
LatentSpace_v2	Ectorhinal area	inferior rostral gyrus	0.8821879631127943
LatentSpace_v2	Ectorhinal area	lateral orbital gyrus	0.7883480295449051
LatentSpace_v2	Ectorhinal area	medial orbital gyrus	0.8563329362510701
LatentSpace_v2	Ectorhinal area	middle frontal gyrus	0.7249813491422542
LatentSpace_v2	Ectorhinal area	paracentral lobule, anterior part	0.5505356276023003
LatentSpace_v2	Ectorhinal area	paraterminal gyrus	0.6246748124768456
LatentSpace_v2	Ectorhinal area	parolfactory gyri	0.810195067421886
LatentSpace_v2	Ectorhinal area	posterior orbital gyrus	0.8400626704011712
LatentSpace_v2	Ectorhinal area	precentral gyrus	0.4911240463790249
LatentSpace_v2	Ectorhinal area	superior frontal gyrus	0.7699792356842535
LatentSpace_v2	Ectorhinal area	superior rostral gyrus	0.8493787219710519
LatentSpace_v2	Ectorhinal area	insula	0.8972838508590409
LatentSpace_v2	Ectorhinal area	cuneus	0.43111559479991857
LatentSpace_v2	Ectorhinal area	inferior occipital gyrus	0.5529226941560607
LatentSpace_v2	Ectorhinal area	lingual gyrus	0.4627829521209238
LatentSpace_v2	Ectorhinal area	occipital pole	0.5040845329640282
LatentSpace_v2	Ectorhinal area	occipito-temporal gyrus	0.6618324905879842
LatentSpace_v2	Ectorhinal area	superior occipital gyrus	0.5415093377382016
LatentSpace_v2	Ectorhinal area	inferior parietal lobule	0.7003741032491373
LatentSpace_v2	Ectorhinal area	paracentral lobule, posterior part	0.6257385403856464
LatentSpace_v2	Ectorhinal area	postcentral gyrus	0.47403199808320534
LatentSpace_v2	Ectorhinal area	precuneus	0.6396788122903644
LatentSpace_v2	Ectorhinal area	superior parietal lobule	0.5686004522448638
LatentSpace_v2	Ectorhinal area	fusiform gyrus	0.8978329895622069
LatentSpace_v2	Ectorhinal area	Heschl's gyrus	0.6310487858147769
LatentSpace_v2	Ectorhinal area	inferior temporal gyrus	0.868068467633629
LatentSpace_v2	Ectorhinal area	middle temporal gyrus	0.8067346784289611
LatentSpace_v2	Ectorhinal area	planum polare	0.8682702271752614
LatentSpace_v2	Ectorhinal area	planum temporale	0.652078384640499
LatentSpace_v2	Ectorhinal area	superior temporal gyrus	0.7905551928646736
LatentSpace_v2	Ectorhinal area	temporal pole	0.8844083736997108
LatentSpace_v2	Ectorhinal area	transverse gyri	0.6150230974903803
LatentSpace_v2	Primary motor area	cingulate gyrus	0.8645496176269665
LatentSpace_v2	Primary motor area	parahippocampal gyrus	0.5184795848065462
LatentSpace_v2	Primary motor area	piriform cortex	0.0059131419481620205
LatentSpace_v2	Primary motor area	anterior orbital gyrus	0.8788368770254946
LatentSpace_v2	Primary motor area	frontal operculum	0.8702447408104191
LatentSpace_v2	Primary motor area	frontal pole	0.9114029858414995
LatentSpace_v2	Primary motor area	gyrus rectus	0.7951555521960241
LatentSpace_v2	Primary motor area	inferior frontal gyrus	0.9405720033480097
LatentSpace_v2	Primary motor area	inferior rostral gyrus	0.7710527837832767
LatentSpace_v2	Primary motor area	lateral orbital gyrus	0.9156503338033684
LatentSpace_v2	Primary motor area	medial orbital gyrus	0.8293863223627393
LatentSpace_v2	Primary motor area	middle frontal gyrus	0.9341717928388914
LatentSpace_v2	Primary motor area	paracentral lobule, anterior part	0.9510727885393423
LatentSpace_v2	Primary motor area	paraterminal gyrus	0.33582317722566457
LatentSpace_v2	Primary motor area	parolfactory gyri	0.5256899568346203
LatentSpace_v2	Primary motor area	posterior orbital gyrus	0.8733384420661606
LatentSpace_v2	Primary motor area	precentral gyrus	0.937296500872238
LatentSpace_v2	Primary motor area	superior frontal gyrus	0.9232802467453755
LatentSpace_v2	Primary motor area	superior rostral gyrus	0.8326042243934771
LatentSpace_v2	Primary motor area	insula	0.7791921924054841
LatentSpace_v2	Primary motor area	cuneus	0.8734061421573973
LatentSpace_v2	Primary motor area	inferior occipital gyrus	0.9358026801746516
LatentSpace_v2	Primary motor area	lingual gyrus	0.8794336795966792
LatentSpace_v2	Primary motor area	occipital pole	0.9017064976605828
LatentSpace_v2	Primary motor area	occipito-temporal gyrus	0.955843235435563
LatentSpace_v2	Primary motor area	superior occipital gyrus	0.9307031955021124
LatentSpace_v2	Primary motor area	inferior parietal lobule	0.9430201225080452
LatentSpace_v2	Primary motor area	paracentral lobule, posterior part	0.8950009508070859
LatentSpace_v2	Primary motor area	postcentral gyrus	0.9219809223531337
LatentSpace_v2	Primary motor area	precuneus	0.9474725357576018
LatentSpace_v2	Primary motor area	superior parietal lobule	0.9370906349776793
LatentSpace_v2	Primary motor area	fusiform gyrus	0.7683343789016651
LatentSpace_v2	Primary motor area	Heschl's gyrus	0.944131719036474
LatentSpace_v2	Primary motor area	inferior temporal gyrus	0.8522770603978173
LatentSpace_v2	Primary motor area	middle temporal gyrus	0.9153368847463226
LatentSpace_v2	Primary motor area	planum polare	0.8334386306592283
LatentSpace_v2	Primary motor area	planum temporale	0.9241280587648961
LatentSpace_v2	Primary motor area	superior temporal gyrus	0.9219086134948904
LatentSpace_v2	Primary motor area	temporal pole	0.6062253766693272
LatentSpace_v2	Primary motor area	transverse gyri	0.9516073065134568
LatentSpace_v2	Secondary motor area	cingulate gyrus	0.8979793258455598
LatentSpace_v2	Secondary motor area	parahippocampal gyrus	0.6132964854779972
LatentSpace_v2	Secondary motor area	piriform cortex	0.10961224311696853
LatentSpace_v2	Secondary motor area	anterior orbital gyrus	0.9030018158289511
LatentSpace_v2	Secondary motor area	frontal operculum	0.8868680216741346
LatentSpace_v2	Secondary motor area	frontal pole	0.9345713409703247
LatentSpace_v2	Secondary motor area	gyrus rectus	0.8442642382160362
LatentSpace_v2	Secondary motor area	inferior frontal gyrus	0.9222327894274017
LatentSpace_v2	Secondary motor area	inferior rostral gyrus	0.8240183740750384
LatentSpace_v2	Secondary motor area	lateral orbital gyrus	0.9154509713139671
LatentSpace_v2	Secondary motor area	medial orbital gyrus	0.8713448145359456
LatentSpace_v2	Secondary motor area	middle frontal gyrus	0.9280557387142822
LatentSpace_v2	Secondary motor area	paracentral lobule, anterior part	0.8866594341665774
LatentSpace_v2	Secondary motor area	paraterminal gyrus	0.4559002231960323
LatentSpace_v2	Secondary motor area	parolfactory gyri	0.6256624723505497
LatentSpace_v2	Secondary motor area	posterior orbital gyrus	0.8920975106293968
LatentSpace_v2	Secondary motor area	precentral gyrus	0.8710919186608597
LatentSpace_v2	Secondary motor area	superior frontal gyrus	0.9288148731095353
LatentSpace_v2	Secondary motor area	superior rostral gyrus	0.8714369456397506
LatentSpace_v2	Secondary motor area	insula	0.8159253633866983
LatentSpace_v2	Secondary motor area	cuneus	0.7756156429018103
LatentSpace_v2	Secondary motor area	inferior occipital gyrus	0.8634012690734223
LatentSpace_v2	Secondary motor area	lingual gyrus	0.7809871015732214
LatentSpace_v2	Secondary motor area	occipital pole	0.804315088505545
LatentSpace_v2	Secondary motor area	occipito-temporal gyrus	0.9094215207781029
LatentSpace_v2	Secondary motor area	superior occipital gyrus	0.8642047902382296
LatentSpace_v2	Secondary motor area	inferior parietal lobule	0.9100327160484559
LatentSpace_v2	Secondary motor area	paracentral lobule, posterior part	0.847135820258312
LatentSpace_v2	Secondary motor area	postcentral gyrus	0.8395798968518151
LatentSpace_v2	Secondary motor area	precuneus	0.9112357835298799
LatentSpace_v2	Secondary motor area	superior parietal lobule	0.8785770054107884
LatentSpace_v2	Secondary motor area	fusiform gyrus	0.8043274543830518
LatentSpace_v2	Secondary motor area	Heschl's gyrus	0.885687091929118
LatentSpace_v2	Secondary motor area	inferior temporal gyrus	0.8700570239275338
LatentSpace_v2	Secondary motor area	middle temporal gyrus	0.9119106500150399
LatentSpace_v2	Secondary motor area	planum polare	0.8505988376573631
LatentSpace_v2	Secondary motor area	planum temporale	0.8984596231316084
LatentSpace_v2	Secondary motor area	superior temporal gyrus	0.9115668138163103
LatentSpace_v2	Secondary motor area	temporal pole	0.6821792233132971
LatentSpace_v2	Secondary motor area	transverse gyri	0.883594530130245
LatentSpace_v2	Frontal pole, cerebral cortex	cingulate gyrus	0.8117618583322614
LatentSpace_v2	Frontal pole, cerebral cortex	parahippocampal gyrus	0.6871982675653061
LatentSpace_v2	Frontal pole, cerebral cortex	piriform cortex	0.3129160119110382
LatentSpace_v2	Frontal pole, cerebral cortex	anterior orbital gyrus	0.8304089441176001
LatentSpace_v2	Frontal pole, cerebral cortex	frontal operculum	0.8248615318304986
LatentSpace_v2	Frontal pole, cerebral cortex	frontal pole	0.8074815288698797
LatentSpace_v2	Frontal pole, cerebral cortex	gyrus rectus	0.8320867265924972
LatentSpace_v2	Frontal pole, cerebral cortex	inferior frontal gyrus	0.7753286647001847
LatentSpace_v2	Frontal pole, cerebral cortex	inferior rostral gyrus	0.7976681688801995
LatentSpace_v2	Frontal pole, cerebral cortex	lateral orbital gyrus	0.792538602733833
LatentSpace_v2	Frontal pole, cerebral cortex	medial orbital gyrus	0.831686330609986
LatentSpace_v2	Frontal pole, cerebral cortex	middle frontal gyrus	0.7638468391968886
LatentSpace_v2	Frontal pole, cerebral cortex	paracentral lobule, anterior part	0.6461919946503892
LatentSpace_v2	Frontal pole, cerebral cortex	paraterminal gyrus	0.5129296824611299
LatentSpace_v2	Frontal pole, cerebral cortex	parolfactory gyri	0.74435225691272
LatentSpace_v2	Frontal pole, cerebral cortex	posterior orbital gyrus	0.8542323305029585
LatentSpace_v2	Frontal pole, cerebral cortex	precentral gyrus	0.6117923114357744
LatentSpace_v2	Frontal pole, cerebral cortex	superior frontal gyrus	0.7951901761325046
LatentSpace_v2	Frontal pole, cerebral cortex	superior rostral gyrus	0.8301486834819429
LatentSpace_v2	Frontal pole, cerebral cortex	insula	0.8033515574520939
LatentSpace_v2	Frontal pole, cerebral cortex	cuneus	0.49248557205001736
LatentSpace_v2	Frontal pole, cerebral cortex	inferior occipital gyrus	0.6213025638392071
LatentSpace_v2	Frontal pole, cerebral cortex	lingual gyrus	0.49740477062384286
LatentSpace_v2	Frontal pole, cerebral cortex	occipital pole	0.5286270359810953
LatentSpace_v2	Frontal pole, cerebral cortex	occipito-temporal gyrus	0.7167015574970983
LatentSpace_v2	Frontal pole, cerebral cortex	superior occipital gyrus	0.6205998487103492
LatentSpace_v2	Frontal pole, cerebral cortex	inferior parietal lobule	0.7216488691300619
LatentSpace_v2	Frontal pole, cerebral cortex	paracentral lobule, posterior part	0.6048052157701693
LatentSpace_v2	Frontal pole, cerebral cortex	postcentral gyrus	0.5773193484202992
LatentSpace_v2	Frontal pole, cerebral cortex	precuneus	0.69646617151157
LatentSpace_v2	Frontal pole, cerebral cortex	superior parietal lobule	0.6280945945239352
LatentSpace_v2	Frontal pole, cerebral cortex	fusiform gyrus	0.8068906808973516
LatentSpace_v2	Frontal pole, cerebral cortex	Heschl's gyrus	0.6729101622980582
LatentSpace_v2	Frontal pole, cerebral cortex	inferior temporal gyrus	0.8057236167782991
LatentSpace_v2	Frontal pole, cerebral cortex	middle temporal gyrus	0.8053830776421075
LatentSpace_v2	Frontal pole, cerebral cortex	planum polare	0.825854095614196
LatentSpace_v2	Frontal pole, cerebral cortex	planum temporale	0.673643623661896
LatentSpace_v2	Frontal pole, cerebral cortex	superior temporal gyrus	0.7885276165360485
LatentSpace_v2	Frontal pole, cerebral cortex	temporal pole	0.7587150471317713
LatentSpace_v2	Frontal pole, cerebral cortex	transverse gyri	0.6582716980331677
LatentSpace_v2	Orbital area	cingulate gyrus	0.8568973647387237
LatentSpace_v2	Orbital area	parahippocampal gyrus	0.8477249885828338
LatentSpace_v2	Orbital area	piriform cortex	0.5671928454331004
LatentSpace_v2	Orbital area	anterior orbital gyrus	0.8617938991656032
LatentSpace_v2	Orbital area	frontal operculum	0.8663134403577407
LatentSpace_v2	Orbital area	frontal pole	0.8022451095098837
LatentSpace_v2	Orbital area	gyrus rectus	0.9066827552743054
LatentSpace_v2	Orbital area	inferior frontal gyrus	0.7534481003373518
LatentSpace_v2	Orbital area	inferior rostral gyrus	0.8820086057158043
LatentSpace_v2	Orbital area	lateral orbital gyrus	0.7959941297912381
LatentSpace_v2	Orbital area	medial orbital gyrus	0.8888777628085268
LatentSpace_v2	Orbital area	middle frontal gyrus	0.7341455284700649
LatentSpace_v2	Orbital area	paracentral lobule, anterior part	0.5525903580046222
LatentSpace_v2	Orbital area	paraterminal gyrus	0.7296370753476918
LatentSpace_v2	Orbital area	parolfactory gyri	0.9031041257814054
LatentSpace_v2	Orbital area	posterior orbital gyrus	0.8805614415732732
LatentSpace_v2	Orbital area	precentral gyrus	0.4988915886617779
LatentSpace_v2	Orbital area	superior frontal gyrus	0.7852681105469091
LatentSpace_v2	Orbital area	superior rostral gyrus	0.889106321746452
LatentSpace_v2	Orbital area	insula	0.8903727346187688
LatentSpace_v2	Orbital area	cuneus	0.3868749702399614
LatentSpace_v2	Orbital area	inferior occipital gyrus	0.5292742412683961
LatentSpace_v2	Orbital area	lingual gyrus	0.3975433849844421
LatentSpace_v2	Orbital area	occipital pole	0.4351497236265762
LatentSpace_v2	Orbital area	occipito-temporal gyrus	0.6543043246531309
LatentSpace_v2	Orbital area	superior occipital gyrus	0.5317278371221804
LatentSpace_v2	Orbital area	inferior parietal lobule	0.678570454999721
LatentSpace_v2	Orbital area	paracentral lobule, posterior part	0.5521017425959358
LatentSpace_v2	Orbital area	postcentral gyrus	0.46382930704842856
LatentSpace_v2	Orbital area	precuneus	0.6359653480841513
LatentSpace_v2	Orbital area	superior parietal lobule	0.5416916555263388
LatentSpace_v2	Orbital area	fusiform gyrus	0.887455892213353
LatentSpace_v2	Orbital area	Heschl's gyrus	0.6126364793382247
LatentSpace_v2	Orbital area	inferior temporal gyrus	0.8475276456730139
LatentSpace_v2	Orbital area	middle temporal gyrus	0.8040989359075853
LatentSpace_v2	Orbital area	planum polare	0.8821703708407107
LatentSpace_v2	Orbital area	planum temporale	0.6324165531495203
LatentSpace_v2	Orbital area	superior temporal gyrus	0.7828762585247232
LatentSpace_v2	Orbital area	temporal pole	0.8980545114634646
LatentSpace_v2	Orbital area	transverse gyri	0.5876740236579008
LatentSpace_v2	Posterior parietal association areas	cingulate gyrus	0.8035985398194988
LatentSpace_v2	Posterior parietal association areas	parahippocampal gyrus	0.551248344665368
LatentSpace_v2	Posterior parietal association areas	piriform cortex	0.1263256567400157
LatentSpace_v2	Posterior parietal association areas	anterior orbital gyrus	0.7787766708512175
LatentSpace_v2	Posterior parietal association areas	frontal operculum	0.7489279832984942
LatentSpace_v2	Posterior parietal association areas	frontal pole	0.850807554241157
LatentSpace_v2	Posterior parietal association areas	gyrus rectus	0.7160951058468584
LatentSpace_v2	Posterior parietal association areas	inferior frontal gyrus	0.8050785844187813
LatentSpace_v2	Posterior parietal association areas	inferior rostral gyrus	0.7324988110004
LatentSpace_v2	Posterior parietal association areas	lateral orbital gyrus	0.8104609830993987
LatentSpace_v2	Posterior parietal association areas	medial orbital gyrus	0.7511509670048141
LatentSpace_v2	Posterior parietal association areas	middle frontal gyrus	0.839054936409232
LatentSpace_v2	Posterior parietal association areas	paracentral lobule, anterior part	0.7993154857013541
LatentSpace_v2	Posterior parietal association areas	paraterminal gyrus	0.5152268058847969
LatentSpace_v2	Posterior parietal association areas	parolfactory gyri	0.5052619194043227
LatentSpace_v2	Posterior parietal association areas	posterior orbital gyrus	0.7248053102814562
LatentSpace_v2	Posterior parietal association areas	precentral gyrus	0.792748220787182
LatentSpace_v2	Posterior parietal association areas	superior frontal gyrus	0.8237630773752544
LatentSpace_v2	Posterior parietal association areas	superior rostral gyrus	0.7537295129130464
LatentSpace_v2	Posterior parietal association areas	insula	0.6916509255222072
LatentSpace_v2	Posterior parietal association areas	cuneus	0.7503327573837708
LatentSpace_v2	Posterior parietal association areas	inferior occipital gyrus	0.7907258142284495
LatentSpace_v2	Posterior parietal association areas	lingual gyrus	0.7606225275810972
LatentSpace_v2	Posterior parietal association areas	occipital pole	0.7678505227907274
LatentSpace_v2	Posterior parietal association areas	occipito-temporal gyrus	0.8045850887380348
LatentSpace_v2	Posterior parietal association areas	superior occipital gyrus	0.8014398789671314
LatentSpace_v2	Posterior parietal association areas	inferior parietal lobule	0.8273867526592191
LatentSpace_v2	Posterior parietal association areas	paracentral lobule, posterior part	0.84259023976877645
LatentSpace_v2	Posterior parietal association areas	postcentral gyrus	0.7699390845089572
LatentSpace_v2	Posterior parietal association areas	precuneus	0.8440314275667679
LatentSpace_v2	Posterior parietal association areas	superior parietal lobule	0.8236128968093924
LatentSpace_v2	Posterior parietal association areas	fusiform gyrus	0.6608353784077962
LatentSpace_v2	Posterior parietal association areas	Heschl's gyrus	0.8039435993956716
LatentSpace_v2	Posterior parietal association areas	inferior temporal gyrus	0.7510151415663279
LatentSpace_v2	Posterior parietal association areas	middle temporal gyrus	0.7832233106143042
LatentSpace_v2	Posterior parietal association areas	planum polare	0.6896018829794928
LatentSpace_v2	Posterior parietal association areas	planum temporale	0.8745944519246104
LatentSpace_v2	Posterior parietal association areas	superior temporal gyrus	0.7923728119367793
LatentSpace_v2	Posterior parietal association areas	temporal pole	0.5544486943740096
LatentSpace_v2	Posterior parietal association areas	transverse gyri	0.7949872227134691
LatentSpace_v2	Perirhinal area	cingulate gyrus	0.6705522596916322
LatentSpace_v2	Perirhinal area	parahippocampal gyrus	0.8292668117876809
LatentSpace_v2	Perirhinal area	piriform cortex	0.6625611700659881
LatentSpace_v2	Perirhinal area	anterior orbital gyrus	0.6532664129838256
LatentSpace_v2	Perirhinal area	frontal operculum	0.6853193512615247
LatentSpace_v2	Perirhinal area	frontal pole	0.6088380346203537
LatentSpace_v2	Perirhinal area	gyrus rectus	0.7320805876367169
LatentSpace_v2	Perirhinal area	inferior frontal gyrus	0.561607120648543
LatentSpace_v2	Perirhinal area	inferior rostral gyrus	0.7614763285761708
LatentSpace_v2	Perirhinal area	lateral orbital gyrus	0.608762288921394
LatentSpace_v2	Perirhinal area	medial orbital gyrus	0.706230266472694
LatentSpace_v2	Perirhinal area	middle frontal gyrus	0.5444806035365116
LatentSpace_v2	Perirhinal area	paracentral lobule, anterior part	0.3222387572428812
LatentSpace_v2	Perirhinal area	paraterminal gyrus	0.6007001387535653
LatentSpace_v2	Perirhinal area	parolfactory gyri	0.7302704896845772
LatentSpace_v2	Perirhinal area	posterior orbital gyrus	0.6601589998221843
LatentSpace_v2	Perirhinal area	precentral gyrus	0.27038071012891
LatentSpace_v2	Perirhinal area	superior frontal gyrus	0.5911467293865202
LatentSpace_v2	Perirhinal area	superior rostral gyrus	0.6881599236455671
LatentSpace_v2	Perirhinal area	insula	0.7528161511112937
LatentSpace_v2	Perirhinal area	cuneus	0.22176190118523892
LatentSpace_v2	Perirhinal area	inferior occipital gyrus	0.3370449308875499
LatentSpace_v2	Perirhinal area	lingual gyrus	0.25832001257101583
LatentSpace_v2	Perirhinal area	occipital pole	0.2901039422262883
LatentSpace_v2	Perirhinal area	occipito-temporal gyrus	0.44943130060462616
LatentSpace_v2	Perirhinal area	superior occipital gyrus	0.32946127724011914
LatentSpace_v2	Perirhinal area	inferior parietal lobule	0.5042726989434114
LatentSpace_v2	Perirhinal area	paracentral lobule, posterior part	0.4574581817903583
LatentSpace_v2	Perirhinal area	postcentral gyrus	0.25122027977771333
LatentSpace_v2	Perirhinal area	precuneus	0.4413945519650615
LatentSpace_v2	Perirhinal area	superior parietal lobule	0.3666136454470295
LatentSpace_v2	Perirhinal area	fusiform gyrus	0.7581780423180425
LatentSpace_v2	Perirhinal area	Heschl's gyrus	0.4175641943626719
LatentSpace_v2	Perirhinal area	inferior temporal gyrus	0.7122640438765704
LatentSpace_v2	Perirhinal area	middle temporal gyrus	0.6218676880475502
LatentSpace_v2	Perirhinal area	planum polare	0.6918087568782068
LatentSpace_v2	Perirhinal area	planum temporale	0.4765825461166814
LatentSpace_v2	Perirhinal area	superior temporal gyrus	0.6003523858037527
LatentSpace_v2	Perirhinal area	temporal pole	0.7971974115859772
LatentSpace_v2	Perirhinal area	transverse gyri	0.39262818938022426
LatentSpace_v2	Primary somatosensory area	cingulate gyrus	0.7672353297991974
LatentSpace_v2	Primary somatosensory area	parahippocampal gyrus	0.39324796343483953
LatentSpace_v2	Primary somatosensory area	piriform cortex	-0.07240481679649301
LatentSpace_v2	Primary somatosensory area	anterior orbital gyrus	0.7832764819205423
LatentSpace_v2	Primary somatosensory area	frontal operculum	0.781778638788278
LatentSpace_v2	Primary somatosensory area	frontal pole	0.8230720573193716
LatentSpace_v2	Primary somatosensory area	gyrus rectus	0.675157311410306
LatentSpace_v2	Primary somatosensory area	inferior frontal gyrus	0.8919334051628217
LatentSpace_v2	Primary somatosensory area	inferior rostral gyrus	0.660987071883257
LatentSpace_v2	Primary somatosensory area	lateral orbital gyrus	0.8523058227753444
LatentSpace_v2	Primary somatosensory area	medial orbital gyrus	0.7182041484935621
LatentSpace_v2	Primary somatosensory area	middle frontal gyrus	0.8788185435375885
LatentSpace_v2	Primary somatosensory area	paracentral lobule, anterior part	0.9531471672490712
LatentSpace_v2	Primary somatosensory area	paraterminal gyrus	0.20366650074545847
LatentSpace_v2	Primary somatosensory area	parolfactory gyri	0.364152257492937
LatentSpace_v2	Primary somatosensory area	posterior orbital gyrus	0.7744088440518102
LatentSpace_v2	Primary somatosensory area	precentral gyrus	0.943588561777405
LatentSpace_v2	Primary somatosensory area	superior frontal gyrus	0.85127659197951
LatentSpace_v2	Primary somatosensory area	superior rostral gyrus	0.7234588534711572
LatentSpace_v2	Primary somatosensory area	insula	0.6796301368122051
LatentSpace_v2	Primary somatosensory area	cuneus	0.9420035230673454
LatentSpace_v2	Primary somatosensory area	inferior occipital gyrus	0.9575721351566283
LatentSpace_v2	Primary somatosensory area	lingual gyrus	0.9506528191369127
LatentSpace_v2	Primary somatosensory area	occipital pole	0.9647011587141554
LatentSpace_v2	Primary somatosensory area	occipito-temporal gyrus	0.9393507797744844
LatentSpace_v2	Primary somatosensory area	superior occipital gyrus	0.9485575337621588
LatentSpace_v2	Primary somatosensory area	inferior parietal lobule	0.9195581233705113
LatentSpace_v2	Primary somatosensory area	paracentral lobule, posterior part	0.915328144883939
LatentSpace_v2	Primary somatosensory area	postcentral gyrus	0.9525622489228229
LatentSpace_v2	Primary somatosensory area	precuneus	0.9284845826100778
LatentSpace_v2	Primary somatosensory area	superior parietal lobule	0.946976019090766
LatentSpace_v2	Primary somatosensory area	fusiform gyrus	0.6670313301830259
LatentSpace_v2	Primary somatosensory area	Heschl's gyrus	0.9485736522680416
LatentSpace_v2	Primary somatosensory area	inferior temporal gyrus	0.7720474431782766
LatentSpace_v2	Primary somatosensory area	middle temporal gyrus	0.8499773600216032
LatentSpace_v2	Primary somatosensory area	planum polare	0.7421682422088889
LatentSpace_v2	Primary somatosensory area	planum temporale	0.9083765974163533
LatentSpace_v2	Primary somatosensory area	superior temporal gyrus	0.8663837406338174
LatentSpace_v2	Primary somatosensory area	temporal pole	0.4726184393118238
LatentSpace_v2	Primary somatosensory area	transverse gyri	0.9626339701593595
LatentSpace_v2	Supplemental somatosensory area	cingulate gyrus	0.7784936920060209
LatentSpace_v2	Supplemental somatosensory area	parahippocampal gyrus	0.5638911276011513
LatentSpace_v2	Supplemental somatosensory area	piriform cortex	0.18316045823515176
LatentSpace_v2	Supplemental somatosensory area	anterior orbital gyrus	0.7907727850361311
LatentSpace_v2	Supplemental somatosensory area	frontal operculum	0.8144246660922887
LatentSpace_v2	Supplemental somatosensory area	frontal pole	0.7833934025532759
LatentSpace_v2	Supplemental somatosensory area	gyrus rectus	0.7462380435955126
LatentSpace_v2	Supplemental somatosensory area	inferior frontal gyrus	0.8421433978387374
LatentSpace_v2	Supplemental somatosensory area	inferior rostral gyrus	0.7438891233205032
LatentSpace_v2	Supplemental somatosensory area	lateral orbital gyrus	0.8239920822939644
LatentSpace_v2	Supplemental somatosensory area	medial orbital gyrus	0.7628486258875173
LatentSpace_v2	Supplemental somatosensory area	middle frontal gyrus	0.8103967548257877
LatentSpace_v2	Supplemental somatosensory area	paracentral lobule, anterior part	0.7922016120095073
LatentSpace_v2	Supplemental somatosensory area	paraterminal gyrus	0.3281467642179893
LatentSpace_v2	Supplemental somatosensory area	parolfactory gyri	0.5170310795557304
LatentSpace_v2	Supplemental somatosensory area	posterior orbital gyrus	0.7951126594325744
LatentSpace_v2	Supplemental somatosensory area	precentral gyrus	0.7579974924931157
LatentSpace_v2	Supplemental somatosensory area	superior frontal gyrus	0.8112524961786134
LatentSpace_v2	Supplemental somatosensory area	superior rostral gyrus	0.7628664653712433
LatentSpace_v2	Supplemental somatosensory area	insula	0.7695936756283414
LatentSpace_v2	Supplemental somatosensory area	cuneus	0.7507463784243334
LatentSpace_v2	Supplemental somatosensory area	inferior occipital gyrus	0.8038786887209672
LatentSpace_v2	Supplemental somatosensory area	lingual gyrus	0.773320016709115
LatentSpace_v2	Supplemental somatosensory area	occipital pole	0.8024675496999053
LatentSpace_v2	Supplemental somatosensory area	occipito-temporal gyrus	0.833300411269383
LatentSpace_v2	Supplemental somatosensory area	superior occipital gyrus	0.7887955535193742
LatentSpace_v2	Supplemental somatosensory area	inferior parietal lobule	0.8366545023556538
LatentSpace_v2	Supplemental somatosensory area	paracentral lobule, posterior part	0.8107691246534097
LatentSpace_v2	Supplemental somatosensory area	postcentral gyrus	0.764838083058081
LatentSpace_v2	Supplemental somatosensory area	precuneus	0.8102720828426354
LatentSpace_v2	Supplemental somatosensory area	superior parietal lobule	0.7989401517661509
LatentSpace_v2	Supplemental somatosensory area	fusiform gyrus	0.7643918214720488
LatentSpace_v2	Supplemental somatosensory area	Heschl's gyrus	0.8295605631433183
LatentSpace_v2	Supplemental somatosensory area	inferior temporal gyrus	0.8153091584098322
LatentSpace_v2	Supplemental somatosensory area	middle temporal gyrus	0.8346886407820927
LatentSpace_v2	Supplemental somatosensory area	planum polare	0.7957083215551269
LatentSpace_v2	Supplemental somatosensory area	planum temporale	0.8013280523344678
LatentSpace_v2	Supplemental somatosensory area	superior temporal gyrus	0.8397127097334539
LatentSpace_v2	Supplemental somatosensory area	temporal pole	0.6319524214495389
LatentSpace_v2	Supplemental somatosensory area	transverse gyri	0.8348092753734653
LatentSpace_v2	Temporal association areas	cingulate gyrus	0.832347648237505
LatentSpace_v2	Temporal association areas	parahippocampal gyrus	0.7779183215616065
LatentSpace_v2	Temporal association areas	piriform cortex	0.43882277361821315
LatentSpace_v2	Temporal association areas	anterior orbital gyrus	0.8167353708076246
LatentSpace_v2	Temporal association areas	frontal operculum	0.8362985790624039
LatentSpace_v2	Temporal association areas	frontal pole	0.8119673185816846
LatentSpace_v2	Temporal association areas	gyrus rectus	0.8308215384766316
LatentSpace_v2	Temporal association areas	inferior frontal gyrus	0.7921216313394891
LatentSpace_v2	Temporal association areas	inferior rostral gyrus	0.8538315487691318
LatentSpace_v2	Temporal association areas	lateral orbital gyrus	0.8139054821880912
LatentSpace_v2	Temporal association areas	medial orbital gyrus	0.8301476588632413
LatentSpace_v2	Temporal association areas	middle frontal gyrus	0.780551478807515
LatentSpace_v2	Temporal association areas	paracentral lobule, anterior part	0.6392716833101757
LatentSpace_v2	Temporal association areas	paraterminal gyrus	0.5732853066053591
LatentSpace_v2	Temporal association areas	parolfactory gyri	0.6874511201608055
LatentSpace_v2	Temporal association areas	posterior orbital gyrus	0.8014568152109482
LatentSpace_v2	Temporal association areas	precentral gyrus	0.5970507905789756
LatentSpace_v2	Temporal association areas	superior frontal gyrus	0.8029259346304901
LatentSpace_v2	Temporal association areas	superior rostral gyrus	0.8211613916287648
LatentSpace_v2	Temporal association areas	insula	0.8457485562419766
LatentSpace_v2	Temporal association areas	cuneus	0.5605721950079938
LatentSpace_v2	Temporal association areas	inferior occipital gyrus	0.6510126759733307
LatentSpace_v2	Temporal association areas	lingual gyrus	0.5946877828026175
LatentSpace_v2	Temporal association areas	occipital pole	0.6268013950023983
LatentSpace_v2	Temporal association areas	occipito-temporal gyrus	0.7262898801484611
LatentSpace_v2	Temporal association areas	superior occipital gyrus	0.6430283795783556
LatentSpace_v2	Temporal association areas	inferior parietal lobule	0.7657854834720987
LatentSpace_v2	Temporal association areas	paracentral lobule, posterior part	0.7406055165743216
LatentSpace_v2	Temporal association areas	postcentral gyrus	0.5837973864262276
LatentSpace_v2	Temporal association areas	precuneus	0.7258246326393728
LatentSpace_v2	Temporal association areas	superior parietal lobule	0.6771033659153319
LatentSpace_v2	Temporal association areas	fusiform gyrus	0.8366424386676968
LatentSpace_v2	Temporal association areas	Heschl's gyrus	0.7082319108950702
LatentSpace_v2	Temporal association areas	inferior temporal gyrus	0.8542025579122055
LatentSpace_v2	Temporal association areas	middle temporal gyrus	0.816035966892217
LatentSpace_v2	Temporal association areas	planum polare	0.8148736973200404
LatentSpace_v2	Temporal association areas	planum temporale	0.7540324070295354
LatentSpace_v2	Temporal association areas	superior temporal gyrus	0.8085228992934431
LatentSpace_v2	Temporal association areas	temporal pole	0.7839550087284562
LatentSpace_v2	Temporal association areas	transverse gyri	0.6976571353294171
LatentSpace_v2	Visual areas	cingulate gyrus	0.8406853042397338
LatentSpace_v2	Visual areas	parahippocampal gyrus	0.5663327152954066
LatentSpace_v2	Visual areas	piriform cortex	0.11451072067894116
LatentSpace_v2	Visual areas	anterior orbital gyrus	0.8206836216947178
LatentSpace_v2	Visual areas	frontal operculum	0.8092357937031851
LatentSpace_v2	Visual areas	frontal pole	0.883847105269837
LatentSpace_v2	Visual areas	gyrus rectus	0.7562892260524563
LatentSpace_v2	Visual areas	inferior frontal gyrus	0.8668675358933944
LatentSpace_v2	Visual areas	inferior rostral gyrus	0.7704452023289533
LatentSpace_v2	Visual areas	lateral orbital gyrus	0.8665364185794918
LatentSpace_v2	Visual areas	medial orbital gyrus	0.7888097094765304
LatentSpace_v2	Visual areas	middle frontal gyrus	0.8801752122478781
LatentSpace_v2	Visual areas	paracentral lobule, anterior part	0.8554408340497291
LatentSpace_v2	Visual areas	paraterminal gyrus	0.45590302560427376
LatentSpace_v2	Visual areas	parolfactory gyri	0.4975848482539631
LatentSpace_v2	Visual areas	posterior orbital gyrus	0.7773554612857969
LatentSpace_v2	Visual areas	precentral gyrus	0.8425001637677141
LatentSpace_v2	Visual areas	superior frontal gyrus	0.8663550540076551
LatentSpace_v2	Visual areas	superior rostral gyrus	0.786605093240411
LatentSpace_v2	Visual areas	insula	0.7453276272589763
LatentSpace_v2	Visual areas	cuneus	0.8183026388736669
LatentSpace_v2	Visual areas	inferior occipital gyrus	0.8564619361142202
LatentSpace_v2	Visual areas	lingual gyrus	0.8393513245339669
LatentSpace_v2	Visual areas	occipital pole	0.8548640924630532
LatentSpace_v2	Visual areas	occipito-temporal gyrus	0.8679980763937206
LatentSpace_v2	Visual areas	superior occipital gyrus	0.8569984966608595
LatentSpace_v2	Visual areas	inferior parietal lobule	0.8845622486051898
LatentSpace_v2	Visual areas	paracentral lobule, posterior part	0.8908775343510171
LatentSpace_v2	Visual areas	postcentral gyrus	0.8301514471216361
LatentSpace_v2	Visual areas	precuneus	0.8941479013053385
LatentSpace_v2	Visual areas	superior parietal lobule	0.8813304779661164
LatentSpace_v2	Visual areas	fusiform gyrus	0.7141801729472468
LatentSpace_v2	Visual areas	Heschl's gyrus	0.8712962921671396
LatentSpace_v2	Visual areas	inferior temporal gyrus	0.8085807989908255
LatentSpace_v2	Visual areas	middle temporal gyrus	0.8413395921283469
LatentSpace_v2	Visual areas	planum polare	0.7471955229367223
LatentSpace_v2	Visual areas	planum temporale	0.9175831305505615
LatentSpace_v2	Visual areas	superior temporal gyrus	0.8499559896878243
LatentSpace_v2	Visual areas	temporal pole	0.5875952942636062
LatentSpace_v2	Visual areas	transverse gyri	0.8724780312848843
LatentSpace_v3	Anterior cingulate area	cingulate gyrus	0.8150985935870475
LatentSpace_v3	Anterior cingulate area	parahippocampal gyrus	0.5870949969097621
LatentSpace_v3	Anterior cingulate area	piriform cortex	0.12495552836733811
LatentSpace_v3	Anterior cingulate area	anterior orbital gyrus	0.8276613009386311
LatentSpace_v3	Anterior cingulate area	frontal operculum	0.7628239142851246
LatentSpace_v3	Anterior cingulate area	frontal pole	0.8226518149548945
LatentSpace_v3	Anterior cingulate area	gyrus rectus	0.7515222127149533
LatentSpace_v3	Anterior cingulate area	inferior frontal gyrus	0.826215063762973
LatentSpace_v3	Anterior cingulate area	inferior rostral gyrus	0.7473905222369291
LatentSpace_v3	Anterior cingulate area	lateral orbital gyrus	0.7757431096163152
LatentSpace_v3	Anterior cingulate area	medial orbital gyrus	0.7824268052016614
LatentSpace_v3	Anterior cingulate area	middle frontal gyrus	0.8757695529895423
LatentSpace_v3	Anterior cingulate area	paracentral lobule, anterior part	0.7969553207198695
LatentSpace_v3	Anterior cingulate area	paraterminal gyrus	0.46231068963194133
LatentSpace_v3	Anterior cingulate area	parolfactory gyri	0.6152440672858108
LatentSpace_v3	Anterior cingulate area	posterior orbital gyrus	0.7575259321157857
LatentSpace_v3	Anterior cingulate area	precentral gyrus	0.7790073612733016
LatentSpace_v3	Anterior cingulate area	superior frontal gyrus	0.868547736261143
LatentSpace_v3	Anterior cingulate area	superior rostral gyrus	0.809602224990733
LatentSpace_v3	Anterior cingulate area	insula	0.7206372060243051
LatentSpace_v3	Anterior cingulate area	cuneus	0.5966654307681111
LatentSpace_v3	Anterior cingulate area	inferior occipital gyrus	0.7219565911946566
LatentSpace_v3	Anterior cingulate area	lingual gyrus	0.5755718656101704
LatentSpace_v3	Anterior cingulate area	occipital pole	0.6306704932312658
LatentSpace_v3	Anterior cingulate area	occipito-temporal gyrus	0.7801869133633623
LatentSpace_v3	Anterior cingulate area	superior occipital gyrus	0.7545693466120027
LatentSpace_v3	Anterior cingulate area	inferior parietal lobule	0.835114833699396
LatentSpace_v3	Anterior cingulate area	paracentral lobule, posterior part	0.8538162783091875
LatentSpace_v3	Anterior cingulate area	postcentral gyrus	0.7200490247187648
LatentSpace_v3	Anterior cingulate area	precuneus	0.8212556037735441
LatentSpace_v3	Anterior cingulate area	superior parietal lobule	0.7973088080791677
LatentSpace_v3	Anterior cingulate area	fusiform gyrus	0.7346239884104028
LatentSpace_v3	Anterior cingulate area	Heschl's gyrus	0.7384582155775083
LatentSpace_v3	Anterior cingulate area	inferior temporal gyrus	0.7805439377140223
LatentSpace_v3	Anterior cingulate area	middle temporal gyrus	0.8010558841955124
LatentSpace_v3	Anterior cingulate area	planum polare	0.741552986506812
LatentSpace_v3	Anterior cingulate area	planum temporale	0.810756442618175
LatentSpace_v3	Anterior cingulate area	superior temporal gyrus	0.8282866678488304
LatentSpace_v3	Anterior cingulate area	temporal pole	0.6422942735616043
LatentSpace_v3	Anterior cingulate area	transverse gyri	0.7080214432323655
LatentSpace_v3	Infralimbic area	cingulate gyrus	0.48896009536898616
LatentSpace_v3	Infralimbic area	parahippocampal gyrus	0.6022184378151524
LatentSpace_v3	Infralimbic area	piriform cortex	0.6774094641779284
LatentSpace_v3	Infralimbic area	anterior orbital gyrus	0.48407525565481896
LatentSpace_v3	Infralimbic area	frontal operculum	0.4430601069016446
LatentSpace_v3	Infralimbic area	frontal pole	0.35535425658712144
LatentSpace_v3	Infralimbic area	gyrus rectus	0.5541650833383132
LatentSpace_v3	Infralimbic area	inferior frontal gyrus	0.3586237056565959
LatentSpace_v3	Infralimbic area	inferior rostral gyrus	0.5676451947541122
LatentSpace_v3	Infralimbic area	lateral orbital gyrus	0.3754666962192889
LatentSpace_v3	Infralimbic area	medial orbital gyrus	0.5392494458531627
LatentSpace_v3	Infralimbic area	middle frontal gyrus	0.39160132194117236
LatentSpace_v3	Infralimbic area	paracentral lobule, anterior part	0.14594023923397542
LatentSpace_v3	Infralimbic area	paraterminal gyrus	0.7921029659504494
LatentSpace_v3	Infralimbic area	parolfactory gyri	0.7427390442329451
LatentSpace_v3	Infralimbic area	posterior orbital gyrus	0.4073174518311912
LatentSpace_v3	Infralimbic area	precentral gyrus	0.09424587602608468
LatentSpace_v3	Infralimbic area	superior frontal gyrus	0.422012444579396
LatentSpace_v3	Infralimbic area	superior rostral gyrus	0.5698300654278436
LatentSpace_v3	Infralimbic area	insula	0.5171690347157752
LatentSpace_v3	Infralimbic area	cuneus	-0.006703496023731344
LatentSpace_v3	Infralimbic area	inferior occipital gyrus	0.10007090093656393
LatentSpace_v3	Infralimbic area	lingual gyrus	-0.03156765446722155
LatentSpace_v3	Infralimbic area	occipital pole	0.04964777806267977
LatentSpace_v3	Infralimbic area	occipito-temporal gyrus	0.2111661367171706
LatentSpace_v3	Infralimbic area	superior occipital gyrus	0.14807239234825864
LatentSpace_v3	Infralimbic area	inferior parietal lobule	0.3123545696131398
LatentSpace_v3	Infralimbic area	paracentral lobule, posterior part	0.3078643059056076
LatentSpace_v3	Infralimbic area	postcentral gyrus	0.06587838711254809
LatentSpace_v3	Infralimbic area	precuneus	0.24359174252504998
LatentSpace_v3	Infralimbic area	superior parietal lobule	0.16350218128144317
LatentSpace_v3	Infralimbic area	fusiform gyrus	0.5304741508611519
LatentSpace_v3	Infralimbic area	Heschl's gyrus	0.16394380875441575
LatentSpace_v3	Infralimbic area	inferior temporal gyrus	0.4648637544192392
LatentSpace_v3	Infralimbic area	middle temporal gyrus	0.37936989115837544
LatentSpace_v3	Infralimbic area	planum polare	0.47965018684795213
LatentSpace_v3	Infralimbic area	planum temporale	0.2538941517081733
LatentSpace_v3	Infralimbic area	superior temporal gyrus	0.3848144792131831
LatentSpace_v3	Infralimbic area	temporal pole	0.6242338951641327
LatentSpace_v3	Infralimbic area	transverse gyri	0.09690483953708148
LatentSpace_v3	Retrosplenial area	cingulate gyrus	0.5163378367223035
LatentSpace_v3	Retrosplenial area	parahippocampal gyrus	0.2646023436505011
LatentSpace_v3	Retrosplenial area	piriform cortex	-0.09221992535600522
LatentSpace_v3	Retrosplenial area	anterior orbital gyrus	0.5319606757216443
LatentSpace_v3	Retrosplenial area	frontal operculum	0.41270109462730137
LatentSpace_v3	Retrosplenial area	frontal pole	0.6068227065358512
LatentSpace_v3	Retrosplenial area	gyrus rectus	0.3878576109682679
LatentSpace_v3	Retrosplenial area	inferior frontal gyrus	0.5785287876434205
LatentSpace_v3	Retrosplenial area	inferior rostral gyrus	0.3969081558248377
LatentSpace_v3	Retrosplenial area	lateral orbital gyrus	0.5477330441047936
LatentSpace_v3	Retrosplenial area	medial orbital gyrus	0.44393146005272804
LatentSpace_v3	Retrosplenial area	middle frontal gyrus	0.6421855260854418
LatentSpace_v3	Retrosplenial area	paracentral lobule, anterior part	0.6441878308303174
LatentSpace_v3	Retrosplenial area	paraterminal gyrus	0.29846365314935575
LatentSpace_v3	Retrosplenial area	parolfactory gyri	0.20786061929082322
LatentSpace_v3	Retrosplenial area	posterior orbital gyrus	0.4261162744090905
LatentSpace_v3	Retrosplenial area	precentral gyrus	0.6647354686049968
LatentSpace_v3	Retrosplenial area	superior frontal gyrus	0.5954885270057902
LatentSpace_v3	Retrosplenial area	superior rostral gyrus	0.4732000170873018
LatentSpace_v3	Retrosplenial area	insula	0.3581872272561612
LatentSpace_v3	Retrosplenial area	cuneus	0.6740640531636845
LatentSpace_v3	Retrosplenial area	inferior occipital gyrus	0.6795286660592552
LatentSpace_v3	Retrosplenial area	lingual gyrus	0.6520150447715117
LatentSpace_v3	Retrosplenial area	occipital pole	0.6575137914369318
LatentSpace_v3	Retrosplenial area	occipito-temporal gyrus	0.6418382430073909
LatentSpace_v3	Retrosplenial area	superior occipital gyrus	0.7194081667122381
LatentSpace_v3	Retrosplenial area	inferior parietal lobule	0.6598330637274454
LatentSpace_v3	Retrosplenial area	paracentral lobule, posterior part	0.7303457615293019
LatentSpace_v3	Retrosplenial area	postcentral gyrus	0.6934276342909292
LatentSpace_v3	Retrosplenial area	precuneus	0.6972560273131256
LatentSpace_v3	Retrosplenial area	superior parietal lobule	0.7293917669286911
LatentSpace_v3	Retrosplenial area	fusiform gyrus	0.372216619537928
LatentSpace_v3	Retrosplenial area	Heschl's gyrus	0.6466623461586959
LatentSpace_v3	Retrosplenial area	inferior temporal gyrus	0.46772036546512474
LatentSpace_v3	Retrosplenial area	middle temporal gyrus	0.5344064806634307
LatentSpace_v3	Retrosplenial area	planum polare	0.39873495671503467
LatentSpace_v3	Retrosplenial area	planum temporale	0.7129872894164565
LatentSpace_v3	Retrosplenial area	superior temporal gyrus	0.5701302693928779
LatentSpace_v3	Retrosplenial area	temporal pole	0.24821121327937473
LatentSpace_v3	Retrosplenial area	transverse gyri	0.6371735377603757
LatentSpace_v3	Prelimbic area	cingulate gyrus	0.8253260029550612
LatentSpace_v3	Prelimbic area	parahippocampal gyrus	0.7489765936289987
LatentSpace_v3	Prelimbic area	piriform cortex	0.37885384455838844
LatentSpace_v3	Prelimbic area	anterior orbital gyrus	0.8029527870536056
LatentSpace_v3	Prelimbic area	frontal operculum	0.8108469718643416
LatentSpace_v3	Prelimbic area	frontal pole	0.7348760259512144
LatentSpace_v3	Prelimbic area	gyrus rectus	0.8421572638280118
LatentSpace_v3	Prelimbic area	inferior frontal gyrus	0.7242945486511968
LatentSpace_v3	Prelimbic area	inferior rostral gyrus	0.8343331128935078
LatentSpace_v3	Prelimbic area	lateral orbital gyrus	0.702922719115507
LatentSpace_v3	Prelimbic area	medial orbital gyrus	0.8354199413289479
LatentSpace_v3	Prelimbic area	middle frontal gyrus	0.7553994313292592
LatentSpace_v3	Prelimbic area	paracentral lobule, anterior part	0.5757935880799296
LatentSpace_v3	Prelimbic area	paraterminal gyrus	0.5615715536223171
LatentSpace_v3	Prelimbic area	parolfactory gyri	0.8199550385303594
LatentSpace_v3	Prelimbic area	posterior orbital gyrus	0.7781533602583719
LatentSpace_v3	Prelimbic area	precentral gyrus	0.5247785792619273
LatentSpace_v3	Prelimbic area	superior frontal gyrus	0.7930831372691621
LatentSpace_v3	Prelimbic area	superior rostral gyrus	0.8493114631280931
LatentSpace_v3	Prelimbic area	insula	0.8111948245228451
LatentSpace_v3	Prelimbic area	cuneus	0.2300350876664745
LatentSpace_v3	Prelimbic area	inferior occipital gyrus	0.4356809350496151
LatentSpace_v3	Prelimbic area	lingual gyrus	0.22504165668068843
LatentSpace_v3	Prelimbic area	occipital pole	0.29484249545863805
LatentSpace_v3	Prelimbic area	occipito-temporal gyrus	0.5741783543644592
LatentSpace_v3	Prelimbic area	superior occipital gyrus	0.4618714869519639
LatentSpace_v3	Prelimbic area	inferior parietal lobule	0.6708579405514967
LatentSpace_v3	Prelimbic area	paracentral lobule, posterior part	0.6470783417166057
LatentSpace_v3	Prelimbic area	postcentral gyrus	0.4075227572273562
LatentSpace_v3	Prelimbic area	precuneus	0.6100752623196325
LatentSpace_v3	Prelimbic area	superior parietal lobule	0.5300033053669483
LatentSpace_v3	Prelimbic area	fusiform gyrus	0.8215875572912663
LatentSpace_v3	Prelimbic area	Heschl's gyrus	0.5046708613258631
LatentSpace_v3	Prelimbic area	inferior temporal gyrus	0.7975466725069958
LatentSpace_v3	Prelimbic area	middle temporal gyrus	0.7454948458459238
LatentSpace_v3	Prelimbic area	planum polare	0.7815510061942331
LatentSpace_v3	Prelimbic area	planum temporale	0.60541164468695
LatentSpace_v3	Prelimbic area	superior temporal gyrus	0.7489398491359441
LatentSpace_v3	Prelimbic area	temporal pole	0.8192546019954194
LatentSpace_v3	Prelimbic area	transverse gyri	0.4548074748352526
LatentSpace_v3	Primary auditory area	cingulate gyrus	0.7810343059193424
LatentSpace_v3	Primary auditory area	parahippocampal gyrus	0.6549375024642504
LatentSpace_v3	Primary auditory area	piriform cortex	0.3294834841071576
LatentSpace_v3	Primary auditory area	anterior orbital gyrus	0.7878028638966597
LatentSpace_v3	Primary auditory area	frontal operculum	0.7754230700580493
LatentSpace_v3	Primary auditory area	frontal pole	0.8428560166352761
LatentSpace_v3	Primary auditory area	gyrus rectus	0.7250302888268366
LatentSpace_v3	Primary auditory area	inferior frontal gyrus	0.8031669903421705
LatentSpace_v3	Primary auditory area	inferior rostral gyrus	0.7244065950881091
LatentSpace_v3	Primary auditory area	lateral orbital gyrus	0.8623426065545277
LatentSpace_v3	Primary auditory area	medial orbital gyrus	0.7478137224536897
LatentSpace_v3	Primary auditory area	middle frontal gyrus	0.763359553508138
LatentSpace_v3	Primary auditory area	paracentral lobule, anterior part	0.6773458525202043
LatentSpace_v3	Primary auditory area	paraterminal gyrus	0.4694825624820812
LatentSpace_v3	Primary auditory area	parolfactory gyri	0.48862402593024484
LatentSpace_v3	Primary auditory area	posterior orbital gyrus	0.8065924250053464
LatentSpace_v3	Primary auditory area	precentral gyrus	0.6384191419809584
LatentSpace_v3	Primary auditory area	superior frontal gyrus	0.7663171580282099
LatentSpace_v3	Primary auditory area	superior rostral gyrus	0.7279529780147668
LatentSpace_v3	Primary auditory area	insula	0.7557046164915114
LatentSpace_v3	Primary auditory area	cuneus	0.706510724348002
LatentSpace_v3	Primary auditory area	inferior occipital gyrus	0.7658652668199661
LatentSpace_v3	Primary auditory area	lingual gyrus	0.7420746720240912
LatentSpace_v3	Primary auditory area	occipital pole	0.7656008002136107
LatentSpace_v3	Primary auditory area	occipito-temporal gyrus	0.8190019065232678
LatentSpace_v3	Primary auditory area	superior occipital gyrus	0.7504414046550316
LatentSpace_v3	Primary auditory area	inferior parietal lobule	0.8039613666820732
LatentSpace_v3	Primary auditory area	paracentral lobule, posterior part	0.758148264524853
LatentSpace_v3	Primary auditory area	postcentral gyrus	0.6846538891945501
LatentSpace_v3	Primary auditory area	precuneus	0.7948488817925049
LatentSpace_v3	Primary auditory area	superior parietal lobule	0.7501625812146553
LatentSpace_v3	Primary auditory area	fusiform gyrus	0.7400432920638971
LatentSpace_v3	Primary auditory area	Heschl's gyrus	0.8230360400657484
LatentSpace_v3	Primary auditory area	inferior temporal gyrus	0.7990424594469301
LatentSpace_v3	Primary auditory area	middle temporal gyrus	0.8283033980903698
LatentSpace_v3	Primary auditory area	planum polare	0.7876470066576501
LatentSpace_v3	Primary auditory area	planum temporale	0.8251912300315526
LatentSpace_v3	Primary auditory area	superior temporal gyrus	0.8062308062884146
LatentSpace_v3	Primary auditory area	temporal pole	0.6175543851967675
LatentSpace_v3	Primary auditory area	transverse gyri	0.8150433808240479
LatentSpace_v3	Dorsal auditory area	cingulate gyrus	0.790834322124303
LatentSpace_v3	Dorsal auditory area	parahippocampal gyrus	0.600000976637054
LatentSpace_v3	Dorsal auditory area	piriform cortex	0.23231792927463554
LatentSpace_v3	Dorsal auditory area	anterior orbital gyrus	0.8049493872222492
LatentSpace_v3	Dorsal auditory area	frontal operculum	0.7832138698055018
LatentSpace_v3	Dorsal auditory area	frontal pole	0.8760954507091494
LatentSpace_v3	Dorsal auditory area	gyrus rectus	0.7151169581680197
LatentSpace_v3	Dorsal auditory area	inferior frontal gyrus	0.8450492715726827
LatentSpace_v3	Dorsal auditory area	inferior rostral gyrus	0.710374888530485
LatentSpace_v3	Dorsal auditory area	lateral orbital gyrus	0.8874794217705091
LatentSpace_v3	Dorsal auditory area	medial orbital gyrus	0.7468883327688096
LatentSpace_v3	Dorsal auditory area	middle frontal gyrus	0.8096013383113854
LatentSpace_v3	Dorsal auditory area	paracentral lobule, anterior part	0.7650178490196948
LatentSpace_v3	Dorsal auditory area	paraterminal gyrus	0.41403576812661097
LatentSpace_v3	Dorsal auditory area	parolfactory gyri	0.4457961884457173
LatentSpace_v3	Dorsal auditory area	posterior orbital gyrus	0.8184065118982602
LatentSpace_v3	Dorsal auditory area	precentral gyrus	0.7313546902555748
LatentSpace_v3	Dorsal auditory area	superior frontal gyrus	0.8016353117577528
LatentSpace_v3	Dorsal auditory area	superior rostral gyrus	0.7319170804628184
LatentSpace_v3	Dorsal auditory area	insula	0.7445000738973939
LatentSpace_v3	Dorsal auditory area	cuneus	0.7938796385986836
LatentSpace_v3	Dorsal auditory area	inferior occipital gyrus	0.847654032373874
LatentSpace_v3	Dorsal auditory area	lingual gyrus	0.8255978596409315
LatentSpace_v3	Dorsal auditory area	occipital pole	0.8431529258867022
LatentSpace_v3	Dorsal auditory area	occipito-temporal gyrus	0.8828516837082789
LatentSpace_v3	Dorsal auditory area	superior occipital gyrus	0.8333141129008226
LatentSpace_v3	Dorsal auditory area	inferior parietal lobule	0.8594982977790725
LatentSpace_v3	Dorsal auditory area	paracentral lobule, posterior part	0.8225829206169315
LatentSpace_v3	Dorsal auditory area	postcentral gyrus	0.778983302617728
LatentSpace_v3	Dorsal auditory area	precuneus	0.8619486699013011
LatentSpace_v3	Dorsal auditory area	superior parietal lobule	0.8310317939601624
LatentSpace_v3	Dorsal auditory area	fusiform gyrus	0.7276553967391998
LatentSpace_v3	Dorsal auditory area	Heschl's gyrus	0.891197380727508
LatentSpace_v3	Dorsal auditory area	inferior temporal gyrus	0.8049939355371483
LatentSpace_v3	Dorsal auditory area	middle temporal gyrus	0.8558816701844186
LatentSpace_v3	Dorsal auditory area	planum polare	0.7895755565291849
LatentSpace_v3	Dorsal auditory area	planum temporale	0.8862463354279795
LatentSpace_v3	Dorsal auditory area	superior temporal gyrus	0.8423549280503735
LatentSpace_v3	Dorsal auditory area	temporal pole	0.5783152331350802
LatentSpace_v3	Dorsal auditory area	transverse gyri	0.888295552624198
LatentSpace_v3	Ventral auditory area	cingulate gyrus	0.7467361556524336
LatentSpace_v3	Ventral auditory area	parahippocampal gyrus	0.7046863879434836
LatentSpace_v3	Ventral auditory area	piriform cortex	0.45191757105564684
LatentSpace_v3	Ventral auditory area	anterior orbital gyrus	0.7468331268934737
LatentSpace_v3	Ventral auditory area	frontal operculum	0.7627406415755699
LatentSpace_v3	Ventral auditory area	frontal pole	0.7702565513421127
LatentSpace_v3	Ventral auditory area	gyrus rectus	0.7289914346897054
LatentSpace_v3	Ventral auditory area	inferior frontal gyrus	0.7353026739934485
LatentSpace_v3	Ventral auditory area	inferior rostral gyrus	0.7301383445832391
LatentSpace_v3	Ventral auditory area	lateral orbital gyrus	0.8081546223436221
LatentSpace_v3	Ventral auditory area	medial orbital gyrus	0.7366822087458869
LatentSpace_v3	Ventral auditory area	middle frontal gyrus	0.682225736239952
LatentSpace_v3	Ventral auditory area	paracentral lobule, anterior part	0.5552867631334818
LatentSpace_v3	Ventral auditory area	paraterminal gyrus	0.4986010672964143
LatentSpace_v3	Ventral auditory area	parolfactory gyri	0.5468894932157787
LatentSpace_v3	Ventral auditory area	posterior orbital gyrus	0.7865118397755522
LatentSpace_v3	Ventral auditory area	precentral gyrus	0.5060163171935457
LatentSpace_v3	Ventral auditory area	superior frontal gyrus	0.7015672779019478
LatentSpace_v3	Ventral auditory area	superior rostral gyrus	0.7088539095132653
LatentSpace_v3	Ventral auditory area	insula	0.7646795475637876
LatentSpace_v3	Ventral auditory area	cuneus	0.5604165394817568
LatentSpace_v3	Ventral auditory area	inferior occipital gyrus	0.6335387522599802
LatentSpace_v3	Ventral auditory area	lingual gyrus	0.5997987962935928
LatentSpace_v3	Ventral auditory area	occipital pole	0.6330507344238495
LatentSpace_v3	Ventral auditory area	occipito-temporal gyrus	0.7131964943130161
LatentSpace_v3	Ventral auditory area	superior occipital gyrus	0.6126764315379893
LatentSpace_v3	Ventral auditory area	inferior parietal lobule	0.7074178203952116
LatentSpace_v3	Ventral auditory area	paracentral lobule, posterior part	0.6442562065024131
LatentSpace_v3	Ventral auditory area	postcentral gyrus	0.5400503650899302
LatentSpace_v3	Ventral auditory area	precuneus	0.678398533177026
LatentSpace_v3	Ventral auditory area	superior parietal lobule	0.6135400114403812
LatentSpace_v3	Ventral auditory area	fusiform gyrus	0.7479077525811771
LatentSpace_v3	Ventral auditory area	Heschl's gyrus	0.7098435356883717
LatentSpace_v3	Ventral auditory area	inferior temporal gyrus	0.7766289092876735
LatentSpace_v3	Ventral auditory area	middle temporal gyrus	0.7769237509518826
LatentSpace_v3	Ventral auditory area	planum polare	0.7806626297437294
LatentSpace_v3	Ventral auditory area	planum temporale	0.7081891955259976
LatentSpace_v3	Ventral auditory area	superior temporal gyrus	0.7439555836232131
LatentSpace_v3	Ventral auditory area	temporal pole	0.6639981726469585
LatentSpace_v3	Ventral auditory area	transverse gyri	0.6941442301795852
LatentSpace_v3	Agranular insular area	cingulate gyrus	0.7876843352307725
LatentSpace_v3	Agranular insular area	parahippocampal gyrus	0.7903155864590627
LatentSpace_v3	Agranular insular area	piriform cortex	0.5391411120889256
LatentSpace_v3	Agranular insular area	anterior orbital gyrus	0.7671313704094387
LatentSpace_v3	Agranular insular area	frontal operculum	0.824693418162242
LatentSpace_v3	Agranular insular area	frontal pole	0.6789595675748646
LatentSpace_v3	Agranular insular area	gyrus rectus	0.8503984165911976
LatentSpace_v3	Agranular insular area	inferior frontal gyrus	0.6818762598134372
LatentSpace_v3	Agranular insular area	inferior rostral gyrus	0.8398235291276203
LatentSpace_v3	Agranular insular area	lateral orbital gyrus	0.6958174623884575
LatentSpace_v3	Agranular insular area	medial orbital gyrus	0.8294885645206718
LatentSpace_v3	Agranular insular area	middle frontal gyrus	0.67056783942225
LatentSpace_v3	Agranular insular area	paracentral lobule, anterior part	0.46949385858110176
LatentSpace_v3	Agranular insular area	paraterminal gyrus	0.5195509391318822
LatentSpace_v3	Agranular insular area	parolfactory gyri	0.845133850975318
LatentSpace_v3	Agranular insular area	posterior orbital gyrus	0.793887090598417
LatentSpace_v3	Agranular insular area	precentral gyrus	0.39978721164939796
LatentSpace_v3	Agranular insular area	superior frontal gyrus	0.7211996229791032
LatentSpace_v3	Agranular insular area	superior rostral gyrus	0.8229755250258702
LatentSpace_v3	Agranular insular area	insula	0.8406880124455015
LatentSpace_v3	Agranular insular area	cuneus	0.14027104024445883
LatentSpace_v3	Agranular insular area	inferior occipital gyrus	0.3493192613792668
LatentSpace_v3	Agranular insular area	lingual gyrus	0.15048863381398292
LatentSpace_v3	Agranular insular area	occipital pole	0.22090680750080754
LatentSpace_v3	Agranular insular area	occipito-temporal gyrus	0.509935689931361
LatentSpace_v3	Agranular insular area	superior occipital gyrus	0.35789345586052496
LatentSpace_v3	Agranular insular area	inferior parietal lobule	0.5966466601761672
LatentSpace_v3	Agranular insular area	paracentral lobule, posterior part	0.5377097239061607
LatentSpace_v3	Agranular insular area	postcentral gyrus	0.2926429854433357
LatentSpace_v3	Agranular insular area	precuneus	0.5155321338012097
LatentSpace_v3	Agranular insular area	superior parietal lobule	0.4078499574057587
LatentSpace_v3	Agranular insular area	fusiform gyrus	0.838258316565338
LatentSpace_v3	Agranular insular area	Heschl's gyrus	0.44501585177733793
LatentSpace_v3	Agranular insular area	inferior temporal gyrus	0.7932615050610528
LatentSpace_v3	Agranular insular area	middle temporal gyrus	0.7244474505084758
LatentSpace_v3	Agranular insular area	planum polare	0.8049345955386623
LatentSpace_v3	Agranular insular area	planum temporale	0.5125328176547359
LatentSpace_v3	Agranular insular area	superior temporal gyrus	0.70701795837132
LatentSpace_v3	Agranular insular area	temporal pole	0.8580810753886
LatentSpace_v3	Agranular insular area	transverse gyri	0.3851022416522637
LatentSpace_v3	Ectorhinal area	cingulate gyrus	0.7717697060387788
LatentSpace_v3	Ectorhinal area	parahippocampal gyrus	0.8301985021980796
LatentSpace_v3	Ectorhinal area	piriform cortex	0.5885575509832118
LatentSpace_v3	Ectorhinal area	anterior orbital gyrus	0.7438456752030393
LatentSpace_v3	Ectorhinal area	frontal operculum	0.8263854438629475
LatentSpace_v3	Ectorhinal area	frontal pole	0.6910208165623859
LatentSpace_v3	Ectorhinal area	gyrus rectus	0.8255647927412687
LatentSpace_v3	Ectorhinal area	inferior frontal gyrus	0.6703888085631451
LatentSpace_v3	Ectorhinal area	inferior rostral gyrus	0.8169703525241511
LatentSpace_v3	Ectorhinal area	lateral orbital gyrus	0.728140930096875
LatentSpace_v3	Ectorhinal area	medial orbital gyrus	0.7991623318397936
LatentSpace_v3	Ectorhinal area	middle frontal gyrus	0.6163849650161982
LatentSpace_v3	Ectorhinal area	paracentral lobule, anterior part	0.42441092820913284
LatentSpace_v3	Ectorhinal area	paraterminal gyrus	0.5326260676592762
LatentSpace_v3	Ectorhinal area	parolfactory gyri	0.7604001701402241
LatentSpace_v3	Ectorhinal area	posterior orbital gyrus	0.8186647956245734
LatentSpace_v3	Ectorhinal area	precentral gyrus	0.3529748316271741
LatentSpace_v3	Ectorhinal area	superior frontal gyrus	0.6755632203217499
LatentSpace_v3	Ectorhinal area	superior rostral gyrus	0.7676147253777618
LatentSpace_v3	Ectorhinal area	insula	0.8511049494140981
LatentSpace_v3	Ectorhinal area	cuneus	0.2151401722008774
LatentSpace_v3	Ectorhinal area	inferior occipital gyrus	0.3852285568001474
LatentSpace_v3	Ectorhinal area	lingual gyrus	0.2531743069441415
LatentSpace_v3	Ectorhinal area	occipital pole	0.30666289955708204
LatentSpace_v3	Ectorhinal area	occipito-temporal gyrus	0.5391684359424993
LatentSpace_v3	Ectorhinal area	superior occipital gyrus	0.36368991308106075
LatentSpace_v3	Ectorhinal area	inferior parietal lobule	0.5807908916067719
LatentSpace_v3	Ectorhinal area	paracentral lobule, posterior part	0.4853570451669272
LatentSpace_v3	Ectorhinal area	postcentral gyrus	0.29437768714733276
LatentSpace_v3	Ectorhinal area	precuneus	0.5066933124910731
LatentSpace_v3	Ectorhinal area	superior parietal lobule	0.40119952274251447
LatentSpace_v3	Ectorhinal area	fusiform gyrus	0.8409848799879539
LatentSpace_v3	Ectorhinal area	Heschl's gyrus	0.4968855566913515
LatentSpace_v3	Ectorhinal area	inferior temporal gyrus	0.8011982241321698
LatentSpace_v3	Ectorhinal area	middle temporal gyrus	0.7396120110306473
LatentSpace_v3	Ectorhinal area	planum polare	0.8274204973036657
LatentSpace_v3	Ectorhinal area	planum temporale	0.5206247880657028
LatentSpace_v3	Ectorhinal area	superior temporal gyrus	0.6977261854669516
LatentSpace_v3	Ectorhinal area	temporal pole	0.8382092291887422
LatentSpace_v3	Ectorhinal area	transverse gyri	0.46339326981199364
LatentSpace_v3	Primary motor area	cingulate gyrus	0.7874277345825743
LatentSpace_v3	Primary motor area	parahippocampal gyrus	0.4387580142922396
LatentSpace_v3	Primary motor area	piriform cortex	-0.09672946642987286
LatentSpace_v3	Primary motor area	anterior orbital gyrus	0.8142834823627603
LatentSpace_v3	Primary motor area	frontal operculum	0.8052334936991075
LatentSpace_v3	Primary motor area	frontal pole	0.8700405557811066
LatentSpace_v3	Primary motor area	gyrus rectus	0.6981267161485676
LatentSpace_v3	Primary motor area	inferior frontal gyrus	0.8999053451757612
LatentSpace_v3	Primary motor area	inferior rostral gyrus	0.6723918053752421
LatentSpace_v3	Primary motor area	lateral orbital gyrus	0.8386460161247499
LatentSpace_v3	Primary motor area	medial orbital gyrus	0.7360886337992035
LatentSpace_v3	Primary motor area	middle frontal gyrus	0.8966935769256116
LatentSpace_v3	Primary motor area	paracentral lobule, anterior part	0.9705395651984566
LatentSpace_v3	Primary motor area	paraterminal gyrus	0.1687406463419877
LatentSpace_v3	Primary motor area	parolfactory gyri	0.4239899630160208
LatentSpace_v3	Primary motor area	posterior orbital gyrus	0.8295205465548419
LatentSpace_v3	Primary motor area	precentral gyrus	0.9548492598875671
LatentSpace_v3	Primary motor area	superior frontal gyrus	0.879429350745184
LatentSpace_v3	Primary motor area	superior rostral gyrus	0.7422190855996728
LatentSpace_v3	Primary motor area	insula	0.706654147669108
LatentSpace_v3	Primary motor area	cuneus	0.7963374699607276
LatentSpace_v3	Primary motor area	inferior occipital gyrus	0.9015236688943081
LatentSpace_v3	Primary motor area	lingual gyrus	0.7989871419415485
LatentSpace_v3	Primary motor area	occipital pole	0.8204225052911497
LatentSpace_v3	Primary motor area	occipito-temporal gyrus	0.9218914367223403
LatentSpace_v3	Primary motor area	superior occipital gyrus	0.8923192005614563
LatentSpace_v3	Primary motor area	inferior parietal lobule	0.907361818894799
LatentSpace_v3	Primary motor area	paracentral lobule, posterior part	0.8934912368550997
LatentSpace_v3	Primary motor area	postcentral gyrus	0.9031447869958675
LatentSpace_v3	Primary motor area	precuneus	0.9193409105120862
LatentSpace_v3	Primary motor area	superior parietal lobule	0.9194977748319428
LatentSpace_v3	Primary motor area	fusiform gyrus	0.6978733880380338
LatentSpace_v3	Primary motor area	Heschl's gyrus	0.9054139449261225
LatentSpace_v3	Primary motor area	inferior temporal gyrus	0.7843341312360271
LatentSpace_v3	Primary motor area	middle temporal gyrus	0.8641168787161582
LatentSpace_v3	Primary motor area	planum polare	0.7673287143339439
LatentSpace_v3	Primary motor area	planum temporale	0.8892726480019717
LatentSpace_v3	Primary motor area	superior temporal gyrus	0.8833700498171861
LatentSpace_v3	Primary motor area	temporal pole	0.5179717840600666
LatentSpace_v3	Primary motor area	transverse gyri	0.9109489239358394
LatentSpace_v3	Secondary motor area	cingulate gyrus	0.8367507392567836
LatentSpace_v3	Secondary motor area	parahippocampal gyrus	0.5365783372041655
LatentSpace_v3	Secondary motor area	piriform cortex	-0.009906446561424769
LatentSpace_v3	Secondary motor area	anterior orbital gyrus	0.8476233676346123
LatentSpace_v3	Secondary motor area	frontal operculum	0.8308848282026757
LatentSpace_v3	Secondary motor area	frontal pole	0.8734612737391388
LatentSpace_v3	Secondary motor area	gyrus rectus	0.7637731503741084
LatentSpace_v3	Secondary motor area	inferior frontal gyrus	0.8878627718191523
LatentSpace_v3	Secondary motor area	inferior rostral gyrus	0.7440181055417814
LatentSpace_v3	Secondary motor area	lateral orbital gyrus	0.8265187846956876
LatentSpace_v3	Secondary motor area	medial orbital gyrus	0.7941085468992508
LatentSpace_v3	Secondary motor area	middle frontal gyrus	0.9096939149590817
LatentSpace_v3	Secondary motor area	paracentral lobule, anterior part	0.9112623431867702
LatentSpace_v3	Secondary motor area	paraterminal gyrus	0.2790246393678716
LatentSpace_v3	Secondary motor area	parolfactory gyri	0.5473583427599329
LatentSpace_v3	Secondary motor area	posterior orbital gyrus	0.8358085411109939
LatentSpace_v3	Secondary motor area	precentral gyrus	0.8910181904598008
LatentSpace_v3	Secondary motor area	superior frontal gyrus	0.9042607712491728
LatentSpace_v3	Secondary motor area	superior rostral gyrus	0.8071700120171482
LatentSpace_v3	Secondary motor area	insula	0.7525654248214703
LatentSpace_v3	Secondary motor area	cuneus	0.6624221294686404
LatentSpace_v3	Secondary motor area	inferior occipital gyrus	0.806914962236269
LatentSpace_v3	Secondary motor area	lingual gyrus	0.6580605936271593
LatentSpace_v3	Secondary motor area	occipital pole	0.6938912525842122
LatentSpace_v3	Secondary motor area	occipito-temporal gyrus	0.8597388589832945
LatentSpace_v3	Secondary motor area	superior occipital gyrus	0.8146979003007003
LatentSpace_v3	Secondary motor area	inferior parietal lobule	0.8862982548756815
LatentSpace_v3	Secondary motor area	paracentral lobule, posterior part	0.882008860439022
LatentSpace_v3	Secondary motor area	postcentral gyrus	0.8080078274596083
LatentSpace_v3	Secondary motor area	precuneus	0.8808349742521422
LatentSpace_v3	Secondary motor area	superior parietal lobule	0.8629952021476358
LatentSpace_v3	Secondary motor area	fusiform gyrus	0.7543658253085918
LatentSpace_v3	Secondary motor area	Heschl's gyrus	0.8225240462403489
LatentSpace_v3	Secondary motor area	inferior temporal gyrus	0.8167720219812303
LatentSpace_v3	Secondary motor area	middle temporal gyrus	0.8627662172406462
LatentSpace_v3	Secondary motor area	planum polare	0.7871930190830503
LatentSpace_v3	Secondary motor area	planum temporale	0.8574111109935671
LatentSpace_v3	Secondary motor area	superior temporal gyrus	0.8836974650283042
LatentSpace_v3	Secondary motor area	temporal pole	0.6168920410398021
LatentSpace_v3	Secondary motor area	transverse gyri	0.8106373425790803
LatentSpace_v3	Frontal pole, cerebral cortex	cingulate gyrus	0.7707609129497975
LatentSpace_v3	Frontal pole, cerebral cortex	parahippocampal gyrus	0.6242004759683902
LatentSpace_v3	Frontal pole, cerebral cortex	piriform cortex	0.24277455109465268
LatentSpace_v3	Frontal pole, cerebral cortex	anterior orbital gyrus	0.764160554403256
LatentSpace_v3	Frontal pole, cerebral cortex	frontal operculum	0.7899822690594281
LatentSpace_v3	Frontal pole, cerebral cortex	frontal pole	0.7202819196147641
LatentSpace_v3	Frontal pole, cerebral cortex	gyrus rectus	0.7763990508463112
LatentSpace_v3	Frontal pole, cerebral cortex	inferior frontal gyrus	0.7336763663598316
LatentSpace_v3	Frontal pole, cerebral cortex	inferior rostral gyrus	0.7592621480946775
LatentSpace_v3	Frontal pole, cerebral cortex	lateral orbital gyrus	0.6974960094581627
LatentSpace_v3	Frontal pole, cerebral cortex	medial orbital gyrus	0.7782797017838958
LatentSpace_v3	Frontal pole, cerebral cortex	middle frontal gyrus	0.7491439548210451
LatentSpace_v3	Frontal pole, cerebral cortex	paracentral lobule, anterior part	0.6498415456529761
LatentSpace_v3	Frontal pole, cerebral cortex	paraterminal gyrus	0.36076352479619384
LatentSpace_v3	Frontal pole, cerebral cortex	parolfactory gyri	0.6984558418394337
LatentSpace_v3	Frontal pole, cerebral cortex	posterior orbital gyrus	0.7690084512767189
LatentSpace_v3	Frontal pole, cerebral cortex	precentral gyrus	0.6051406235337895
LatentSpace_v3	Frontal pole, cerebral cortex	superior frontal gyrus	0.7739666820099615
LatentSpace_v3	Frontal pole, cerebral cortex	superior rostral gyrus	0.7865228389085998
LatentSpace_v3	Frontal pole, cerebral cortex	insula	0.7563802313379719
LatentSpace_v3	Frontal pole, cerebral cortex	cuneus	0.30716738421318335
LatentSpace_v3	Frontal pole, cerebral cortex	inferior occipital gyrus	0.5013225768638535
LatentSpace_v3	Frontal pole, cerebral cortex	lingual gyrus	0.3047536713300652
LatentSpace_v3	Frontal pole, cerebral cortex	occipital pole	0.35794599738043004
LatentSpace_v3	Frontal pole, cerebral cortex	occipito-temporal gyrus	0.6124308167386789
LatentSpace_v3	Frontal pole, cerebral cortex	superior occipital gyrus	0.5151673529645149
LatentSpace_v3	Frontal pole, cerebral cortex	inferior parietal lobule	0.683197931745243
LatentSpace_v3	Frontal pole, cerebral cortex	paracentral lobule, posterior part	0.6598511275223577
LatentSpace_v3	Frontal pole, cerebral cortex	postcentral gyrus	0.4839779207310494
LatentSpace_v3	Frontal pole, cerebral cortex	precuneus	0.6357874074678183
LatentSpace_v3	Frontal pole, cerebral cortex	superior parietal lobule	0.5705574609755691
LatentSpace_v3	Frontal pole, cerebral cortex	fusiform gyrus	0.7577125697474315
LatentSpace_v3	Frontal pole, cerebral cortex	Heschl's gyrus	0.5524655461620895
LatentSpace_v3	Frontal pole, cerebral cortex	inferior temporal gyrus	0.7580285758112039
LatentSpace_v3	Frontal pole, cerebral cortex	middle temporal gyrus	0.7385341577191796
LatentSpace_v3	Frontal pole, cerebral cortex	planum polare	0.7462761538900518
LatentSpace_v3	Frontal pole, cerebral cortex	planum temporale	0.6153167562045404
LatentSpace_v3	Frontal pole, cerebral cortex	superior temporal gyrus	0.7446590826263606
LatentSpace_v3	Frontal pole, cerebral cortex	temporal pole	0.7149145535341911
[truncated: 378,001 more rows]
