# Supplementary material for: Whole-brain comparison of rodent and human brains using spatial transcriptomics
Source: eLife. 2022 Nov 7;11:e79418. doi: 10.7554/eLife.79418 (PMC9708081; doi:10.7554/eLife.79418)
Supplement: Figure 5—source data 3. [file elife-79418-fig5-data3.csv]

Data	Species	k	wcss
AverageLatentSpace	Mouse	1	1.3368227724941615
AverageLatentSpace	Mouse	2	0.5159122365421396
AverageLatentSpace	Mouse	3	0.23773696132974567
AverageLatentSpace	Mouse	4	0.14512591962279023
AverageLatentSpace	Mouse	5	0.11700465804045938
AverageLatentSpace	Mouse	6	0.05518410329315431
AverageLatentSpace	Mouse	7	0.04267879223597994
AverageLatentSpace	Mouse	8	0.03525644167753345
AverageLatentSpace	Mouse	9	0.027640128209686286
AverageLatentSpace	Mouse	10	0.02211706802979425
AverageLatentSpace	Mouse	11	0.014012884958253993
AverageLatentSpace	Mouse	12	0.01076287433183628
AverageLatentSpace	Mouse	13	0.0066895193850506135
AverageLatentSpace	Mouse	14	0.004136184482239256
AverageLatentSpace	Mouse	15	0.003198577316412473
AverageLatentSpace	Mouse	16	0.0017810114293874036
AverageLatentSpace	Mouse	17	0.0012159129878614961
AverageLatentSpace	Mouse	18	5.615049996791224e-4
AverageLatentSpace	Mouse	19	0
HomologousGenes	Mouse	1	0.15215717464932585
HomologousGenes	Mouse	2	0.0750141507635852
HomologousGenes	Mouse	3	0.04718821180930098
HomologousGenes	Mouse	4	0.03271093006999093
HomologousGenes	Mouse	5	0.012770130054507873
HomologousGenes	Mouse	6	0.008566185004021242
HomologousGenes	Mouse	7	0.006049840475956054
HomologousGenes	Mouse	8	0.0038980546847534317
HomologousGenes	Mouse	9	0.0026842441130515184
HomologousGenes	Mouse	10	0.0020480494235113095
HomologousGenes	Mouse	11	0.0015033915654486883
HomologousGenes	Mouse	12	9.471921343066848e-4
HomologousGenes	Mouse	13	6.120313606272769e-4
HomologousGenes	Mouse	14	4.109202413347029e-4
HomologousGenes	Mouse	15	2.575029563947881e-4
HomologousGenes	Mouse	16	1.3806239588417922e-4
HomologousGenes	Mouse	17	6.49733268184525e-5
HomologousGenes	Mouse	18	6.400006961296673e-6
HomologousGenes	Mouse	19	0
HomologousGenes	Human	1	0.07814477120668267
HomologousGenes	Human	2	0.021987653391364343
HomologousGenes	Human	3	0.013975703223152263
HomologousGenes	Human	4	0.008867045849305059
HomologousGenes	Human	5	0.0050057490615112235
HomologousGenes	Human	6	0.004123151855547071
HomologousGenes	Human	7	0.0036981723372800993
HomologousGenes	Human	8	0.002640818666209322
HomologousGenes	Human	9	0.002168116789569753
HomologousGenes	Human	10	0.0018073563538648007
HomologousGenes	Human	11	0.00155669213626242
HomologousGenes	Human	12	0.0012521226510969893
HomologousGenes	Human	13	0.0010575946308087989
HomologousGenes	Human	14	9.693994202830702e-4
HomologousGenes	Human	15	8.986393868354025e-4
HomologousGenes	Human	16	8.01838993471631e-4
HomologousGenes	Human	17	7.49157367140358e-4
HomologousGenes	Human	18	6.020483280059008e-4
HomologousGenes	Human	19	5.306404015773527e-4
HomologousGenes	Human	20	4.66359111239372e-4
HomologousGenes	Human	21	4.06441502262181e-4
HomologousGenes	Human	22	3.358199616987698e-4
HomologousGenes	Human	23	2.9652186616191953e-4
HomologousGenes	Human	24	2.4289632842903845e-4
HomologousGenes	Human	25	2.1569507747304918e-4
HomologousGenes	Human	26	1.721332842493353e-4
HomologousGenes	Human	27	1.502555944645229e-4
HomologousGenes	Human	28	1.3126338807735165e-4
HomologousGenes	Human	29	1.04793854645469e-4
HomologousGenes	Human	30	9.207595004413971e-5
HomologousGenes	Human	31	7.928628032071408e-5
HomologousGenes	Human	32	6.409233928640355e-5
HomologousGenes	Human	33	5.0664755131357876e-5
HomologousGenes	Human	34	3.945173362030438e-5
HomologousGenes	Human	35	2.991286904435194e-5
HomologousGenes	Human	36	2.5479463916497907e-5
HomologousGenes	Human	37	1.7741080442473485e-5
HomologousGenes	Human	38	1.1086906688118462e-5
HomologousGenes	Human	39	5.200746429513576e-6
HomologousGenes	Human	40	0
AverageLatentSpace	Human	1	0.6196638228379682
AverageLatentSpace	Human	2	0.2846918037974684
AverageLatentSpace	Human	3	0.1471508326818251
AverageLatentSpace	Human	4	0.08966290812189162
AverageLatentSpace	Human	5	0.06385361849306141
AverageLatentSpace	Human	6	0.02602077134655345
AverageLatentSpace	Human	7	0.01778302470721983
AverageLatentSpace	Human	8	0.014505323629457518
AverageLatentSpace	Human	9	0.012173824720352623
AverageLatentSpace	Human	10	0.01003411303877277
AverageLatentSpace	Human	11	0.007599543222180784
AverageLatentSpace	Human	12	0.006436924341567846
AverageLatentSpace	Human	13	0.005618406854824564
AverageLatentSpace	Human	14	0.004968003829990285
AverageLatentSpace	Human	15	0.00452545133278021
AverageLatentSpace	Human	16	0.003424746757123134
AverageLatentSpace	Human	17	0.002471322024416917
AverageLatentSpace	Human	18	0.0023457642904459253
AverageLatentSpace	Human	19	0.0018222878327935968
AverageLatentSpace	Human	20	0.0016136554123740317
AverageLatentSpace	Human	21	0.0014475523172947742
AverageLatentSpace	Human	22	0.0012620521348887955
AverageLatentSpace	Human	23	0.0011374805739458895
AverageLatentSpace	Human	24	9.152806218624927e-4
AverageLatentSpace	Human	25	8.272557367813255e-4
AverageLatentSpace	Human	26	7.413744910327374e-4
AverageLatentSpace	Human	27	0.00060568142130496775
AverageLatentSpace	Human	28	5.28840837267142e-4
AverageLatentSpace	Human	29	4.3076019680418376e-4
AverageLatentSpace	Human	30	3.415375493731556e-4
AverageLatentSpace	Human	31	2.600820720388549e-4
AverageLatentSpace	Human	32	1.8613016846590394e-4
AverageLatentSpace	Human	33	1.450848930391903e-4
AverageLatentSpace	Human	34	1.3024399064246955e-4
AverageLatentSpace	Human	35	9.917909649404433e-5
AverageLatentSpace	Human	36	7.303520591107127e-5
AverageLatentSpace	Human	37	4.959984918302671e-5
AverageLatentSpace	Human	38	2.9638378107089742e-5
AverageLatentSpace	Human	39	1.2402594022839883e-5
AverageLatentSpace	Human	40	0
