# Supplementary material for: Whole-brain comparison of rodent and human brains using spatial transcriptomics
Source: eLife. 2022 Nov 7;11:e79418. doi: 10.7554/eLife.79418 (PMC9708081; doi:10.7554/eLife.79418)
Supplement: Figure 6—source data 1. [file elife-79418-fig6-data1.csv]

Data	HumanRegion	SampleID	MouseRegion	Correlation
LatentSpace1	Caudate	12	Caudoputamen	0.9576984116659399
LatentSpace1	Caudate	12	Nucleus accumbens	0.7891585090671072
LatentSpace1	Caudate	12	Fundus of striatum	0.8015233331511894
LatentSpace1	Caudate	12	Olfactory tubercle	0.6966465916188554
LatentSpace1	Caudate	136	Caudoputamen	0.9378353444746308
LatentSpace1	Caudate	136	Nucleus accumbens	0.7327710525801204
LatentSpace1	Caudate	136	Fundus of striatum	0.7359600004836568
LatentSpace1	Caudate	136	Olfactory tubercle	0.6368066034738569
LatentSpace1	Caudate	164	Caudoputamen	0.9347083474933059
LatentSpace1	Caudate	164	Nucleus accumbens	0.760993949296113
LatentSpace1	Caudate	164	Fundus of striatum	0.7515907629387281
LatentSpace1	Caudate	164	Olfactory tubercle	0.6739358662025865
LatentSpace1	Caudate	173	Caudoputamen	0.9068314054596637
LatentSpace1	Caudate	173	Nucleus accumbens	0.7627332645153008
LatentSpace1	Caudate	173	Fundus of striatum	0.750840900681904
LatentSpace1	Caudate	173	Olfactory tubercle	0.677855734187661
LatentSpace1	Caudate	218	Caudoputamen	0.9519239213552088
LatentSpace1	Caudate	218	Nucleus accumbens	0.7352364691937265
LatentSpace1	Caudate	218	Fundus of striatum	0.7334341914886762
LatentSpace1	Caudate	218	Olfactory tubercle	0.6325057195907715
LatentSpace1	Caudate	315	Caudoputamen	0.2962038267350357
LatentSpace1	Caudate	315	Nucleus accumbens	0.2699352708259259
LatentSpace1	Caudate	315	Fundus of striatum	0.3234390704591971
LatentSpace1	Caudate	315	Olfactory tubercle	0.2388675732223384
LatentSpace1	Caudate	422	Caudoputamen	0.9508456356638132
LatentSpace1	Caudate	422	Nucleus accumbens	0.7445397060610649
LatentSpace1	Caudate	422	Fundus of striatum	0.7661739233436501
LatentSpace1	Caudate	422	Olfactory tubercle	0.6396616573602978
LatentSpace1	Caudate	452	Caudoputamen	0.9322184161692026
LatentSpace1	Caudate	452	Nucleus accumbens	0.7508686561335823
LatentSpace1	Caudate	452	Fundus of striatum	0.7474885805910633
LatentSpace1	Caudate	452	Olfactory tubercle	0.6579162410506978
LatentSpace1	Caudate	483	Caudoputamen	0.9436551744280647
LatentSpace1	Caudate	483	Nucleus accumbens	0.7504778164559365
LatentSpace1	Caudate	483	Fundus of striatum	0.749320438879547
LatentSpace1	Caudate	483	Olfactory tubercle	0.6508494513554222
LatentSpace1	Caudate	487	Caudoputamen	0.935003770158083
LatentSpace1	Caudate	487	Nucleus accumbens	0.7572142987332043
LatentSpace1	Caudate	487	Fundus of striatum	0.7514966925218619
LatentSpace1	Caudate	487	Olfactory tubercle	0.6580888752332322
LatentSpace1	Caudate	490	Caudoputamen	0.9099304418304454
LatentSpace1	Caudate	490	Nucleus accumbens	0.6927496933724958
LatentSpace1	Caudate	490	Fundus of striatum	0.6929669191817927
LatentSpace1	Caudate	490	Olfactory tubercle	0.5982843761368051
LatentSpace1	Caudate	512	Caudoputamen	0.955289660850202
LatentSpace1	Caudate	512	Nucleus accumbens	0.8359390675168875
LatentSpace1	Caudate	512	Fundus of striatum	0.8432989219810721
LatentSpace1	Caudate	512	Olfactory tubercle	0.7448758535899
LatentSpace1	Caudate	557	Caudoputamen	0.9611794243549537
LatentSpace1	Caudate	557	Nucleus accumbens	0.7932830240503216
LatentSpace1	Caudate	557	Fundus of striatum	0.8010872252693666
LatentSpace1	Caudate	557	Olfactory tubercle	0.6904711418395367
LatentSpace1	Caudate	647	Caudoputamen	0.9568979350636863
LatentSpace1	Caudate	647	Nucleus accumbens	0.7687429682127804
LatentSpace1	Caudate	647	Fundus of striatum	0.7604652177464912
LatentSpace1	Caudate	647	Olfactory tubercle	0.6743414088031441
LatentSpace1	Caudate	656	Caudoputamen	0.9559258307725411
LatentSpace1	Caudate	656	Nucleus accumbens	0.7864577499463775
LatentSpace1	Caudate	656	Fundus of striatum	0.7764441369285987
LatentSpace1	Caudate	656	Olfactory tubercle	0.6904319626382331
LatentSpace1	Caudate	657	Caudoputamen	0.9402897215750042
LatentSpace1	Caudate	657	Nucleus accumbens	0.7268805954556995
LatentSpace1	Caudate	657	Fundus of striatum	0.7204423643148152
LatentSpace1	Caudate	657	Olfactory tubercle	0.6343418338131359
LatentSpace1	Caudate	786	Caudoputamen	0.9609815311665865
LatentSpace1	Caudate	786	Nucleus accumbens	0.8200251795584016
LatentSpace1	Caudate	786	Fundus of striatum	0.818957684100487
LatentSpace1	Caudate	786	Olfactory tubercle	0.7352027422289891
LatentSpace1	Caudate	796	Caudoputamen	0.9570080319146068
LatentSpace1	Caudate	796	Nucleus accumbens	0.7872863460283938
LatentSpace1	Caudate	796	Fundus of striatum	0.7911352316290986
LatentSpace1	Caudate	796	Olfactory tubercle	0.6897796921519773
LatentSpace1	Caudate	885	Caudoputamen	0.9446889697703083
LatentSpace1	Caudate	885	Nucleus accumbens	0.749516618731544
LatentSpace1	Caudate	885	Fundus of striatum	0.740793601474186
LatentSpace1	Caudate	885	Olfactory tubercle	0.6521369467459122
LatentSpace1	Caudate	887	Caudoputamen	0.951083316068217
LatentSpace1	Caudate	887	Nucleus accumbens	0.7505141166834756
LatentSpace1	Caudate	887	Fundus of striatum	0.7497086945789636
LatentSpace1	Caudate	887	Olfactory tubercle	0.6518886767794767
LatentSpace1	Caudate	916	Caudoputamen	0.9253953371948741
LatentSpace1	Caudate	916	Nucleus accumbens	0.7323272011066477
LatentSpace1	Caudate	916	Fundus of striatum	0.7228211995393836
LatentSpace1	Caudate	916	Olfactory tubercle	0.6425900300681868
LatentSpace1	Caudate	917	Caudoputamen	0.8309174701564005
LatentSpace1	Caudate	917	Nucleus accumbens	0.6888316379099513
LatentSpace1	Caudate	917	Fundus of striatum	0.6743530608250315
LatentSpace1	Caudate	917	Olfactory tubercle	0.6354582866289403
LatentSpace1	Caudate	918	Caudoputamen	0.8510199656168349
LatentSpace1	Caudate	918	Nucleus accumbens	0.7351483698631887
LatentSpace1	Caudate	918	Fundus of striatum	0.7148331658549688
LatentSpace1	Caudate	918	Olfactory tubercle	0.6767123881953295
LatentSpace1	Caudate	924	Caudoputamen	0.9003808850031367
LatentSpace1	Caudate	924	Nucleus accumbens	0.7050614983578569
LatentSpace1	Caudate	924	Fundus of striatum	0.696726628852825
LatentSpace1	Caudate	924	Olfactory tubercle	0.6261697277094347
LatentSpace1	Caudate	929	Caudoputamen	0.946020963845143
LatentSpace1	Caudate	929	Nucleus accumbens	0.753273145906167
LatentSpace1	Caudate	929	Fundus of striatum	0.7413735608181393
LatentSpace1	Caudate	929	Olfactory tubercle	0.6566898886850856
LatentSpace1	Caudate	933	Caudoputamen	0.8948042313016094
LatentSpace1	Caudate	933	Nucleus accumbens	0.7020570301624756
LatentSpace1	Caudate	933	Fundus of striatum	0.6952746908341584
LatentSpace1	Caudate	933	Olfactory tubercle	0.6255041696095984
LatentSpace1	Caudate	967	Caudoputamen	0.9590537367923607
LatentSpace1	Caudate	967	Nucleus accumbens	0.7740674698437524
LatentSpace1	Caudate	967	Fundus of striatum	0.7875256546946859
LatentSpace1	Caudate	967	Olfactory tubercle	0.6686875903581435
LatentSpace1	Caudate	979	Caudoputamen	0.9310185724695266
LatentSpace1	Caudate	979	Nucleus accumbens	0.7436423793551545
LatentSpace1	Caudate	979	Fundus of striatum	0.767752273305351
LatentSpace1	Caudate	979	Olfactory tubercle	0.6629470454663658
LatentSpace1	Caudate	1022	Caudoputamen	0.9465267931750273
LatentSpace1	Caudate	1022	Nucleus accumbens	0.7418364678971124
LatentSpace1	Caudate	1022	Fundus of striatum	0.735978597592728
LatentSpace1	Caudate	1022	Olfactory tubercle	0.6416507841468055
LatentSpace1	Caudate	1043	Caudoputamen	0.9469874741805632
LatentSpace1	Caudate	1043	Nucleus accumbens	0.772676952326001
LatentSpace1	Caudate	1043	Fundus of striatum	0.7621906035366144
LatentSpace1	Caudate	1043	Olfactory tubercle	0.6762048135195626
LatentSpace1	Caudate	1239	Caudoputamen	0.9682851844721987
LatentSpace1	Caudate	1239	Nucleus accumbens	0.7462663560346094
LatentSpace1	Caudate	1239	Fundus of striatum	0.7426656769260993
LatentSpace1	Caudate	1239	Olfactory tubercle	0.6470042854483697
LatentSpace1	Caudate	1247	Caudoputamen	0.9659746508825973
LatentSpace1	Caudate	1247	Nucleus accumbens	0.7594182221641039
LatentSpace1	Caudate	1247	Fundus of striatum	0.7573125093726946
LatentSpace1	Caudate	1247	Olfactory tubercle	0.6598735406214519
LatentSpace1	Caudate	1248	Caudoputamen	0.9490390832560794
LatentSpace1	Caudate	1248	Nucleus accumbens	0.7584329447700381
LatentSpace1	Caudate	1248	Fundus of striatum	0.7535062813805684
LatentSpace1	Caudate	1248	Olfactory tubercle	0.6661756906420387
LatentSpace1	Caudate	1249	Caudoputamen	0.9181394153376833
LatentSpace1	Caudate	1249	Nucleus accumbens	0.6816372826578719
LatentSpace1	Caudate	1249	Fundus of striatum	0.6882246121499801
LatentSpace1	Caudate	1249	Olfactory tubercle	0.5970225975768808
LatentSpace1	Caudate	1254	Caudoputamen	0.9382173179866762
LatentSpace1	Caudate	1254	Nucleus accumbens	0.7252977844088906
LatentSpace1	Caudate	1254	Fundus of striatum	0.7247866786581033
LatentSpace1	Caudate	1254	Olfactory tubercle	0.6389511681868356
LatentSpace1	Caudate	1306	Caudoputamen	0.9482117419848203
LatentSpace1	Caudate	1306	Nucleus accumbens	0.7172002396404152
LatentSpace1	Caudate	1306	Fundus of striatum	0.7335750713558719
LatentSpace1	Caudate	1306	Olfactory tubercle	0.6219622603645795
LatentSpace1	Caudate	1458	Caudoputamen	0.9290511436862252
LatentSpace1	Caudate	1458	Nucleus accumbens	0.7634282849022348
LatentSpace1	Caudate	1458	Fundus of striatum	0.759173713312212
LatentSpace1	Caudate	1458	Olfactory tubercle	0.6726792544400758
LatentSpace1	Caudate	1473	Caudoputamen	0.2900507541219754
LatentSpace1	Caudate	1473	Nucleus accumbens	0.37466342161766036
LatentSpace1	Caudate	1473	Fundus of striatum	0.3310554102341595
LatentSpace1	Caudate	1473	Olfactory tubercle	0.3295761471871227
LatentSpace1	Caudate	1486	Caudoputamen	0.9734711312163314
LatentSpace1	Caudate	1486	Nucleus accumbens	0.7970328338809689
LatentSpace1	Caudate	1486	Fundus of striatum	0.802099847817202
LatentSpace1	Caudate	1486	Olfactory tubercle	0.7029077355699894
LatentSpace1	Caudate	1503	Caudoputamen	0.9640433748039217
LatentSpace1	Caudate	1503	Nucleus accumbens	0.7628662636057231
LatentSpace1	Caudate	1503	Fundus of striatum	0.7669459968919002
LatentSpace1	Caudate	1503	Olfactory tubercle	0.6636555545711824
LatentSpace1	Caudate	1511	Caudoputamen	0.9601829486028928
LatentSpace1	Caudate	1511	Nucleus accumbens	0.7612827995836445
LatentSpace1	Caudate	1511	Fundus of striatum	0.7613740849122513
LatentSpace1	Caudate	1511	Olfactory tubercle	0.6620275521581134
LatentSpace1	Caudate	1674	Caudoputamen	0.9725891135233256
LatentSpace1	Caudate	1674	Nucleus accumbens	0.7563633135215515
LatentSpace1	Caudate	1674	Fundus of striatum	0.7620045763820539
LatentSpace1	Caudate	1674	Olfactory tubercle	0.6588193337777636
LatentSpace1	Caudate	1675	Caudoputamen	0.9700114011348464
LatentSpace1	Caudate	1675	Nucleus accumbens	0.7378558054785
LatentSpace1	Caudate	1675	Fundus of striatum	0.7478354157069311
LatentSpace1	Caudate	1675	Olfactory tubercle	0.635879746388973
LatentSpace1	Caudate	1700	Caudoputamen	0.9648448000829863
LatentSpace1	Caudate	1700	Nucleus accumbens	0.7302688213851533
LatentSpace1	Caudate	1700	Fundus of striatum	0.727032341880251
LatentSpace1	Caudate	1700	Olfactory tubercle	0.6302258254205293
LatentSpace1	Caudate	1707	Caudoputamen	0.973431792300259
LatentSpace1	Caudate	1707	Nucleus accumbens	0.7470401846436094
LatentSpace1	Caudate	1707	Fundus of striatum	0.7572968564818059
LatentSpace1	Caudate	1707	Olfactory tubercle	0.6428061202460809
LatentSpace1	Caudate	1727	Caudoputamen	0.9490209792882461
LatentSpace1	Caudate	1727	Nucleus accumbens	0.6948637907555452
LatentSpace1	Caudate	1727	Fundus of striatum	0.71707773860053
LatentSpace1	Caudate	1727	Olfactory tubercle	0.6071865719028716
LatentSpace1	Caudate	1737	Caudoputamen	0.9521929913397564
LatentSpace1	Caudate	1737	Nucleus accumbens	0.7230492855586396
LatentSpace1	Caudate	1737	Fundus of striatum	0.7298562747143579
LatentSpace1	Caudate	1737	Olfactory tubercle	0.6334420107602394
LatentSpace1	Caudate	1781	Caudoputamen	0.9673773266652166
LatentSpace1	Caudate	1781	Nucleus accumbens	0.7870685642435684
LatentSpace1	Caudate	1781	Fundus of striatum	0.7821651013478973
LatentSpace1	Caudate	1781	Olfactory tubercle	0.6828390907424747
LatentSpace1	Caudate	1782	Caudoputamen	0.9585775309365527
LatentSpace1	Caudate	1782	Nucleus accumbens	0.7361525758169438
LatentSpace1	Caudate	1782	Fundus of striatum	0.7414617952444216
LatentSpace1	Caudate	1782	Olfactory tubercle	0.6332215751649777
LatentSpace1	Caudate	1790	Caudoputamen	0.9611767919338956
LatentSpace1	Caudate	1790	Nucleus accumbens	0.7276446863742962
LatentSpace1	Caudate	1790	Fundus of striatum	0.7398654275469386
LatentSpace1	Caudate	1790	Olfactory tubercle	0.6291316769694121
LatentSpace1	Caudate	1831	Caudoputamen	0.5275231215202677
LatentSpace1	Caudate	1831	Nucleus accumbens	0.4458165641469043
LatentSpace1	Caudate	1831	Fundus of striatum	0.4088805227006874
LatentSpace1	Caudate	1831	Olfactory tubercle	0.4200035775810344
LatentSpace1	Caudate	1846	Caudoputamen	0.9425631377090489
LatentSpace1	Caudate	1846	Nucleus accumbens	0.7859063322440057
LatentSpace1	Caudate	1846	Fundus of striatum	0.787703246444243
LatentSpace1	Caudate	1846	Olfactory tubercle	0.7029837435747993
LatentSpace1	Caudate	1967	Caudoputamen	0.9784032281773204
LatentSpace1	Caudate	1967	Nucleus accumbens	0.7732588408209241
LatentSpace1	Caudate	1967	Fundus of striatum	0.7841659869421999
LatentSpace1	Caudate	1967	Olfactory tubercle	0.6653184147285403
LatentSpace1	Caudate	1986	Caudoputamen	0.9535758255946284
LatentSpace1	Caudate	1986	Nucleus accumbens	0.7539517659929519
LatentSpace1	Caudate	1986	Fundus of striatum	0.769810170644177
LatentSpace1	Caudate	1986	Olfactory tubercle	0.6551379677878625
LatentSpace1	Caudate	2030	Caudoputamen	0.9592683187492543
LatentSpace1	Caudate	2030	Nucleus accumbens	0.7682174587778116
LatentSpace1	Caudate	2030	Fundus of striatum	0.7796419027258847
LatentSpace1	Caudate	2030	Olfactory tubercle	0.6726454642794011
LatentSpace1	Caudate	2031	Caudoputamen	0.9681743318281629
LatentSpace1	Caudate	2031	Nucleus accumbens	0.7783922888410801
LatentSpace1	Caudate	2031	Fundus of striatum	0.7918094916849655
LatentSpace1	Caudate	2031	Olfactory tubercle	0.6797741499596909
LatentSpace1	Caudate	2053	Caudoputamen	0.9608352773300304
LatentSpace1	Caudate	2053	Nucleus accumbens	0.773882579208971
LatentSpace1	Caudate	2053	Fundus of striatum	0.7684227946425892
LatentSpace1	Caudate	2053	Olfactory tubercle	0.6795268057946134
LatentSpace1	Caudate	2111	Caudoputamen	0.9567387966427668
LatentSpace1	Caudate	2111	Nucleus accumbens	0.7593624300265549
LatentSpace1	Caudate	2111	Fundus of striatum	0.7673053935642224
LatentSpace1	Caudate	2111	Olfactory tubercle	0.6598676405364854
LatentSpace1	Caudate	2161	Caudoputamen	0.9293969343908454
LatentSpace1	Caudate	2161	Nucleus accumbens	0.6822485191541258
LatentSpace1	Caudate	2161	Fundus of striatum	0.6856109400295429
LatentSpace1	Caudate	2161	Olfactory tubercle	0.5886042246036695
LatentSpace1	Caudate	2165	Caudoputamen	0.9462862193522688
LatentSpace1	Caudate	2165	Nucleus accumbens	0.7281375714425699
LatentSpace1	Caudate	2165	Fundus of striatum	0.7345633459412436
LatentSpace1	Caudate	2165	Olfactory tubercle	0.633480100382688
LatentSpace1	Caudate	2203	Caudoputamen	0.9157685148883776
LatentSpace1	Caudate	2203	Nucleus accumbens	0.7525797076325492
LatentSpace1	Caudate	2203	Fundus of striatum	0.7522968225742919
LatentSpace1	Caudate	2203	Olfactory tubercle	0.6701135508649061
LatentSpace1	Caudate	2256	Caudoputamen	0.9467122934264317
LatentSpace1	Caudate	2256	Nucleus accumbens	0.7629200006816662
LatentSpace1	Caudate	2256	Fundus of striatum	0.764450582984853
LatentSpace1	Caudate	2256	Olfactory tubercle	0.6763905268417972
LatentSpace1	Caudate	2285	Caudoputamen	0.8074027612108826
LatentSpace1	Caudate	2285	Nucleus accumbens	0.754911204659132
LatentSpace1	Caudate	2285	Fundus of striatum	0.7509652764228413
LatentSpace1	Caudate	2285	Olfactory tubercle	0.7059782866267184
LatentSpace1	Caudate	2344	Caudoputamen	0.9475297314856885
LatentSpace1	Caudate	2344	Nucleus accumbens	0.7457419123014636
LatentSpace1	Caudate	2344	Fundus of striatum	0.7411252418060227
LatentSpace1	Caudate	2344	Olfactory tubercle	0.651849178845013
LatentSpace1	Caudate	2349	Caudoputamen	0.9436829906510601
LatentSpace1	Caudate	2349	Nucleus accumbens	0.743478277364772
LatentSpace1	Caudate	2349	Fundus of striatum	0.7471744171047547
LatentSpace1	Caudate	2349	Olfactory tubercle	0.6527406210918882
LatentSpace1	Caudate	2365	Caudoputamen	0.9405196129801221
LatentSpace1	Caudate	2365	Nucleus accumbens	0.8390815958240457
LatentSpace1	Caudate	2365	Fundus of striatum	0.8222916322562618
LatentSpace1	Caudate	2365	Olfactory tubercle	0.7499760340353854
LatentSpace1	Caudate	2387	Caudoputamen	0.9373899760088035
LatentSpace1	Caudate	2387	Nucleus accumbens	0.8984094296102159
LatentSpace1	Caudate	2387	Fundus of striatum	0.8918163057982945
LatentSpace1	Caudate	2387	Olfactory tubercle	0.8145417436168697
LatentSpace1	Caudate	2626	Caudoputamen	0.9322847967654191
LatentSpace1	Caudate	2626	Nucleus accumbens	0.7124824734375768
LatentSpace1	Caudate	2626	Fundus of striatum	0.7189871500842672
LatentSpace1	Caudate	2626	Olfactory tubercle	0.6200772923732883
LatentSpace1	Caudate	2694	Caudoputamen	0.9511143015587931
LatentSpace1	Caudate	2694	Nucleus accumbens	0.7555983731396695
LatentSpace1	Caudate	2694	Fundus of striatum	0.7534782928071604
LatentSpace1	Caudate	2694	Olfactory tubercle	0.6610166785863053
LatentSpace1	Caudate	2710	Caudoputamen	0.9360784028479675
LatentSpace1	Caudate	2710	Nucleus accumbens	0.7434451003750354
LatentSpace1	Caudate	2710	Fundus of striatum	0.7396274930198864
LatentSpace1	Caudate	2710	Olfactory tubercle	0.6588030382315707
LatentSpace1	Caudate	2711	Caudoputamen	0.9625233611949489
LatentSpace1	Caudate	2711	Nucleus accumbens	0.7884868346540431
LatentSpace1	Caudate	2711	Fundus of striatum	0.791212968188503
LatentSpace1	Caudate	2711	Olfactory tubercle	0.6990919957787348
LatentSpace1	Caudate	2777	Caudoputamen	0.9635901717929072
LatentSpace1	Caudate	2777	Nucleus accumbens	0.7602730916058528
LatentSpace1	Caudate	2777	Fundus of striatum	0.7635479564242068
LatentSpace1	Caudate	2777	Olfactory tubercle	0.6633207489823973
LatentSpace1	Caudate	2779	Caudoputamen	0.9524616770852345
LatentSpace1	Caudate	2779	Nucleus accumbens	0.7255942916397945
LatentSpace1	Caudate	2779	Fundus of striatum	0.7350846402064763
LatentSpace1	Caudate	2779	Olfactory tubercle	0.6273768352518204
LatentSpace1	Caudate	2811	Caudoputamen	0.9552337057350064
LatentSpace1	Caudate	2811	Nucleus accumbens	0.7332039442597048
LatentSpace1	Caudate	2811	Fundus of striatum	0.745741413106885
LatentSpace1	Caudate	2811	Olfactory tubercle	0.6361239780145602
LatentSpace1	Caudate	2812	Caudoputamen	0.964574095324784
LatentSpace1	Caudate	2812	Nucleus accumbens	0.7720406585139945
LatentSpace1	Caudate	2812	Fundus of striatum	0.7786765717163392
LatentSpace1	Caudate	2812	Olfactory tubercle	0.677594916827011
LatentSpace1	Caudate	2844	Caudoputamen	0.8958393849225722
LatentSpace1	Caudate	2844	Nucleus accumbens	0.7226591459487568
LatentSpace1	Caudate	2844	Fundus of striatum	0.7141207289417848
LatentSpace1	Caudate	2844	Olfactory tubercle	0.6470773777273547
LatentSpace1	Caudate	2981	Caudoputamen	0.9677403099766061
LatentSpace1	Caudate	2981	Nucleus accumbens	0.7611686036232764
LatentSpace1	Caudate	2981	Fundus of striatum	0.7850249284806508
LatentSpace1	Caudate	2981	Olfactory tubercle	0.6630297030373671
LatentSpace1	Caudate	3019	Caudoputamen	0.9547164836761551
LatentSpace1	Caudate	3019	Nucleus accumbens	0.7542405117810429
LatentSpace1	Caudate	3019	Fundus of striatum	0.7660243111971992
LatentSpace1	Caudate	3019	Olfactory tubercle	0.6593659971457152
LatentSpace1	Caudate	3061	Caudoputamen	0.9592793844503192
LatentSpace1	Caudate	3061	Nucleus accumbens	0.7844706727858815
LatentSpace1	Caudate	3061	Fundus of striatum	0.7958864965856278
LatentSpace1	Caudate	3061	Olfactory tubercle	0.6902501360055165
LatentSpace1	Caudate	3081	Caudoputamen	0.9546290058941271
LatentSpace1	Caudate	3081	Nucleus accumbens	0.8242906749039014
LatentSpace1	Caudate	3081	Fundus of striatum	0.8254553242385192
LatentSpace1	Caudate	3081	Olfactory tubercle	0.7350977772600653
LatentSpace1	Caudate	3279	Caudoputamen	0.9421381528481808
LatentSpace1	Caudate	3279	Nucleus accumbens	0.8073193522912119
LatentSpace1	Caudate	3279	Fundus of striatum	0.8029796824089744
LatentSpace1	Caudate	3279	Olfactory tubercle	0.7166997747832959
LatentSpace1	Caudate	3287	Caudoputamen	0.9586392429517235
LatentSpace1	Caudate	3287	Nucleus accumbens	0.7492831184186624
LatentSpace1	Caudate	3287	Fundus of striatum	0.7471159805520371
LatentSpace1	Caudate	3287	Olfactory tubercle	0.6469140752492846
LatentSpace1	Caudate	3299	Caudoputamen	0.9669773513007757
LatentSpace1	Caudate	3299	Nucleus accumbens	0.7665249583698508
LatentSpace1	Caudate	3299	Fundus of striatum	0.7723704897666491
LatentSpace1	Caudate	3299	Olfactory tubercle	0.6655839711054014
LatentSpace1	Caudate	3302	Caudoputamen	0.942895582856324
LatentSpace1	Caudate	3302	Nucleus accumbens	0.7837480932718787
LatentSpace1	Caudate	3302	Fundus of striatum	0.7875151037247929
LatentSpace1	Caudate	3302	Olfactory tubercle	0.6967587477012109
LatentSpace1	Caudate	3426	Caudoputamen	0.9517883671803385
LatentSpace1	Caudate	3426	Nucleus accumbens	0.7143246088148069
LatentSpace1	Caudate	3426	Fundus of striatum	0.7264832666065882
LatentSpace1	Caudate	3426	Olfactory tubercle	0.6131511897018336
LatentSpace1	Caudate	3512	Caudoputamen	0.9552148485232492
LatentSpace1	Caudate	3512	Nucleus accumbens	0.7483289804815565
LatentSpace1	Caudate	3512	Fundus of striatum	0.7508761798337148
LatentSpace1	Caudate	3512	Olfactory tubercle	0.6483587378936507
LatentSpace1	Caudate	3513	Caudoputamen	0.9606473447988134
LatentSpace1	Caudate	3513	Nucleus accumbens	0.7638257454355392
LatentSpace1	Caudate	3513	Fundus of striatum	0.7658035941123621
LatentSpace1	Caudate	3513	Olfactory tubercle	0.6629490887557432
LatentSpace1	Caudate	3621	Caudoputamen	0.970586106718964
LatentSpace1	Caudate	3621	Nucleus accumbens	0.8336584323401898
LatentSpace1	Caudate	3621	Fundus of striatum	0.833918581431616
LatentSpace1	Caudate	3621	Olfactory tubercle	0.7459064868477264
LatentSpace1	Caudate	3657	Caudoputamen	0.9439007087020045
LatentSpace1	Caudate	3657	Nucleus accumbens	0.7932571852232572
LatentSpace1	Caudate	3657	Fundus of striatum	0.7885271160223669
LatentSpace1	Caudate	3657	Olfactory tubercle	0.7063216875168017
LatentSpace1	Caudate	3662	Caudoputamen	0.9370315600050517
LatentSpace1	Caudate	3662	Nucleus accumbens	0.7932316086870601
LatentSpace1	Caudate	3662	Fundus of striatum	0.7823794972198783
LatentSpace1	Caudate	3662	Olfactory tubercle	0.704316600768587
LatentSpace1	Caudate	3663	Caudoputamen	0.9600839325096321
LatentSpace1	Caudate	3663	Nucleus accumbens	0.8124669666203737
LatentSpace1	Caudate	3663	Fundus of striatum	0.8110824450643429
LatentSpace1	Caudate	3663	Olfactory tubercle	0.7222654862522382
LatentSpace1	Putamen	60	Caudoputamen	0.7742668714717771
LatentSpace1	Putamen	60	Nucleus accumbens	0.6067935672603536
LatentSpace1	Putamen	60	Fundus of striatum	0.6125820246965296
LatentSpace1	Putamen	60	Olfactory tubercle	0.5620137584620515
LatentSpace1	Putamen	103	Caudoputamen	0.8719671989445774
LatentSpace1	Putamen	103	Nucleus accumbens	0.7531672752020537
LatentSpace1	Putamen	103	Fundus of striatum	0.7524030233853093
LatentSpace1	Putamen	103	Olfactory tubercle	0.6917325683996005
LatentSpace1	Putamen	137	Caudoputamen	0.8730564745632964
LatentSpace1	Putamen	137	Nucleus accumbens	0.6655189035206959
LatentSpace1	Putamen	137	Fundus of striatum	0.6792991560863724
LatentSpace1	Putamen	137	Olfactory tubercle	0.5925395217449718
LatentSpace1	Putamen	165	Caudoputamen	0.8726165347117799
LatentSpace1	Putamen	165	Nucleus accumbens	0.6850493376149691
LatentSpace1	Putamen	165	Fundus of striatum	0.6977048798600591
LatentSpace1	Putamen	165	Olfactory tubercle	0.6114243286791163
LatentSpace1	Putamen	174	Caudoputamen	0.8650912773742974
LatentSpace1	Putamen	174	Nucleus accumbens	0.6819572832304183
LatentSpace1	Putamen	174	Fundus of striatum	0.6827640755104771
LatentSpace1	Putamen	174	Olfactory tubercle	0.6087657574186021
LatentSpace1	Putamen	423	Caudoputamen	0.9251739795524031
LatentSpace1	Putamen	423	Nucleus accumbens	0.7236481413212912
LatentSpace1	Putamen	423	Fundus of striatum	0.7400871905400976
LatentSpace1	Putamen	423	Olfactory tubercle	0.6299851455120516
LatentSpace1	Putamen	451	Caudoputamen	0.9257495168551865
LatentSpace1	Putamen	451	Nucleus accumbens	0.7409786916776568
LatentSpace1	Putamen	451	Fundus of striatum	0.7468863265262293
LatentSpace1	Putamen	451	Olfactory tubercle	0.6497214989911241
LatentSpace1	Putamen	455	Caudoputamen	0.9134022834367388
LatentSpace1	Putamen	455	Nucleus accumbens	0.7090584234758197
LatentSpace1	Putamen	455	Fundus of striatum	0.7220266238185418
LatentSpace1	Putamen	455	Olfactory tubercle	0.6198032055532839
LatentSpace1	Putamen	499	Caudoputamen	0.930058355434726
LatentSpace1	Putamen	499	Nucleus accumbens	0.7362431065415502
LatentSpace1	Putamen	499	Fundus of striatum	0.7349784409893029
LatentSpace1	Putamen	499	Olfactory tubercle	0.6358962417013595
LatentSpace1	Putamen	625	Caudoputamen	0.9597652388918091
LatentSpace1	Putamen	625	Nucleus accumbens	0.7854427562927746
LatentSpace1	Putamen	625	Fundus of striatum	0.7777975521096909
LatentSpace1	Putamen	625	Olfactory tubercle	0.6883604001591301
LatentSpace1	Putamen	648	Caudoputamen	0.963961723950775
LatentSpace1	Putamen	648	Nucleus accumbens	0.7918260025764927
LatentSpace1	Putamen	648	Fundus of striatum	0.7803097800679573
LatentSpace1	Putamen	648	Olfactory tubercle	0.6946145803949356
LatentSpace1	Putamen	649	Caudoputamen	0.9569927072038781
LatentSpace1	Putamen	649	Nucleus accumbens	0.7723429691545686
LatentSpace1	Putamen	649	Fundus of striatum	0.7642003743917974
LatentSpace1	Putamen	649	Olfactory tubercle	0.6773352907001771
LatentSpace1	Putamen	652	Caudoputamen	0.9154932493324419
LatentSpace1	Putamen	652	Nucleus accumbens	0.7306562065556467
LatentSpace1	Putamen	652	Fundus of striatum	0.727728322598997
LatentSpace1	Putamen	652	Olfactory tubercle	0.6511281189157849
LatentSpace1	Putamen	876	Caudoputamen	0.9345126567086947
LatentSpace1	Putamen	876	Nucleus accumbens	0.7515919588434242
LatentSpace1	Putamen	876	Fundus of striatum	0.74003550576437
LatentSpace1	Putamen	876	Olfactory tubercle	0.6604687477366475
LatentSpace1	Putamen	886	Caudoputamen	0.9424385679036955
LatentSpace1	Putamen	886	Nucleus accumbens	0.7640127019820974
LatentSpace1	Putamen	886	Fundus of striatum	0.7531206612351067
LatentSpace1	Putamen	886	Olfactory tubercle	0.6689176276823426
LatentSpace1	Putamen	888	Caudoputamen	0.9455360054879841
LatentSpace1	Putamen	888	Nucleus accumbens	0.7578267153726186
LatentSpace1	Putamen	888	Fundus of striatum	0.7541239341821062
LatentSpace1	Putamen	888	Olfactory tubercle	0.6643256423181425
LatentSpace1	Putamen	925	Caudoputamen	0.8543212992104743
LatentSpace1	Putamen	925	Nucleus accumbens	0.6742309047004201
LatentSpace1	Putamen	925	Fundus of striatum	0.6757421907758245
LatentSpace1	Putamen	925	Olfactory tubercle	0.6082950429429153
LatentSpace1	Putamen	927	Caudoputamen	0.861462386009186
LatentSpace1	Putamen	927	Nucleus accumbens	0.6843117068340816
LatentSpace1	Putamen	927	Fundus of striatum	0.6807914802596134
LatentSpace1	Putamen	927	Olfactory tubercle	0.6167966601741278
LatentSpace1	Putamen	928	Caudoputamen	0.8198788798152106
LatentSpace1	Putamen	928	Nucleus accumbens	0.6224415595257651
LatentSpace1	Putamen	928	Fundus of striatum	0.6246937501181395
LatentSpace1	Putamen	928	Olfactory tubercle	0.5618919633575647
LatentSpace1	Putamen	936	Caudoputamen	0.8429194649952452
LatentSpace1	Putamen	936	Nucleus accumbens	0.6433681431028041
LatentSpace1	Putamen	936	Fundus of striatum	0.6561249797708856
LatentSpace1	Putamen	936	Olfactory tubercle	0.5747476398015471
LatentSpace1	Putamen	980	Caudoputamen	0.9403661886154846
LatentSpace1	Putamen	980	Nucleus accumbens	0.7509600030445962
LatentSpace1	Putamen	980	Fundus of striatum	0.7530776613359053
LatentSpace1	Putamen	980	Olfactory tubercle	0.6569289311790937
LatentSpace1	Putamen	1044	Caudoputamen	0.9272398626567872
LatentSpace1	Putamen	1044	Nucleus accumbens	0.6900787760373984
LatentSpace1	Putamen	1044	Fundus of striatum	0.6913578856523674
LatentSpace1	Putamen	1044	Olfactory tubercle	0.5907131938409376
LatentSpace1	Putamen	1048	Caudoputamen	0.9457509316620459
LatentSpace1	Putamen	1048	Nucleus accumbens	0.7267761860482788
LatentSpace1	Putamen	1048	Fundus of striatum	0.7233153456836076
LatentSpace1	Putamen	1048	Olfactory tubercle	0.626772151118264
LatentSpace1	Putamen	1240	Caudoputamen	0.9521452557745184
LatentSpace1	Putamen	1240	Nucleus accumbens	0.7504860573669829
LatentSpace1	Putamen	1240	Fundus of striatum	0.7440500484537583
LatentSpace1	Putamen	1240	Olfactory tubercle	0.6559759333299631
LatentSpace1	Putamen	1242	Caudoputamen	0.944686596158438
LatentSpace1	Putamen	1242	Nucleus accumbens	0.695244733867425
LatentSpace1	Putamen	1242	Fundus of striatum	0.7087788875429823
LatentSpace1	Putamen	1242	Olfactory tubercle	0.5984932642362303
LatentSpace1	Putamen	1244	Caudoputamen	0.9623466089637503
LatentSpace1	Putamen	1244	Nucleus accumbens	0.7154849460277355
LatentSpace1	Putamen	1244	Fundus of striatum	0.7327795360653078
LatentSpace1	Putamen	1244	Olfactory tubercle	0.6192228174644877
LatentSpace1	Putamen	1250	Caudoputamen	0.9492384623165215
LatentSpace1	Putamen	1250	Nucleus accumbens	0.7207240752071686
LatentSpace1	Putamen	1250	Fundus of striatum	0.7240685319672614
LatentSpace1	Putamen	1250	Olfactory tubercle	0.6248914821580083
LatentSpace1	Putamen	1255	Caudoputamen	0.9367824426402208
LatentSpace1	Putamen	1255	Nucleus accumbens	0.7208624565886905
LatentSpace1	Putamen	1255	Fundus of striatum	0.7205714766792162
LatentSpace1	Putamen	1255	Olfactory tubercle	0.6281486661319426
LatentSpace1	Putamen	1259	Caudoputamen	0.9418173278754018
LatentSpace1	Putamen	1259	Nucleus accumbens	0.6931072016996754
LatentSpace1	Putamen	1259	Fundus of striatum	0.6937041445158962
LatentSpace1	Putamen	1259	Olfactory tubercle	0.5980516518273985
LatentSpace1	Putamen	1307	Caudoputamen	0.9382525658170525
LatentSpace1	Putamen	1307	Nucleus accumbens	0.7116307273590202
LatentSpace1	Putamen	1307	Fundus of striatum	0.7280641429047118
LatentSpace1	Putamen	1307	Olfactory tubercle	0.6226618450034545
LatentSpace1	Putamen	1326	Caudoputamen	0.9090117951822023
LatentSpace1	Putamen	1326	Nucleus accumbens	0.6965529048698761
LatentSpace1	Putamen	1326	Fundus of striatum	0.7047561401558979
LatentSpace1	Putamen	1326	Olfactory tubercle	0.6116884571015093
LatentSpace1	Putamen	1517	Caudoputamen	0.9695710039446119
LatentSpace1	Putamen	1517	Nucleus accumbens	0.7324439547003245
LatentSpace1	Putamen	1517	Fundus of striatum	0.7476768946212166
LatentSpace1	Putamen	1517	Olfactory tubercle	0.6288973932785278
LatentSpace1	Putamen	1539	Caudoputamen	0.9594176139519537
LatentSpace1	Putamen	1539	Nucleus accumbens	0.726135524236405
LatentSpace1	Putamen	1539	Fundus of striatum	0.7462788946298028
LatentSpace1	Putamen	1539	Olfactory tubercle	0.6253158532920178
LatentSpace1	Putamen	1773	Caudoputamen	0.9448948894088495
LatentSpace1	Putamen	1773	Nucleus accumbens	0.6810203863257364
LatentSpace1	Putamen	1773	Fundus of striatum	0.695716821766748
LatentSpace1	Putamen	1773	Olfactory tubercle	0.5810629056723075
LatentSpace1	Putamen	1849	Caudoputamen	0.9475927956100523
LatentSpace1	Putamen	1849	Nucleus accumbens	0.8014489556513573
LatentSpace1	Putamen	1849	Fundus of striatum	0.790508840828197
LatentSpace1	Putamen	1849	Olfactory tubercle	0.7110651302624946
LatentSpace1	Putamen	1957	Caudoputamen	0.9257572764977455
LatentSpace1	Putamen	1957	Nucleus accumbens	0.7893360979776133
LatentSpace1	Putamen	1957	Fundus of striatum	0.7964268477228668
LatentSpace1	Putamen	1957	Olfactory tubercle	0.7102272870191908
LatentSpace1	Putamen	2028	Caudoputamen	0.8972301848853429
LatentSpace1	Putamen	2028	Nucleus accumbens	0.8011439157947494
LatentSpace1	Putamen	2028	Fundus of striatum	0.7985616078925144
LatentSpace1	Putamen	2028	Olfactory tubercle	0.7392009052523587
LatentSpace1	Putamen	2160	Caudoputamen	0.9207426295681009
LatentSpace1	Putamen	2160	Nucleus accumbens	0.7095020125886544
LatentSpace1	Putamen	2160	Fundus of striatum	0.7242469662813126
LatentSpace1	Putamen	2160	Olfactory tubercle	0.6290078601415089
LatentSpace1	Putamen	2164	Caudoputamen	0.9240994958486577
LatentSpace1	Putamen	2164	Nucleus accumbens	0.7348344843081148
LatentSpace1	Putamen	2164	Fundus of striatum	0.7448312491686955
LatentSpace1	Putamen	2164	Olfactory tubercle	0.652652600498786
LatentSpace1	Putamen	2255	Caudoputamen	0.7754461815245021
LatentSpace1	Putamen	2255	Nucleus accumbens	0.6696696714295687
LatentSpace1	Putamen	2255	Fundus of striatum	0.6749760028122624
LatentSpace1	Putamen	2255	Olfactory tubercle	0.6358015796877778
LatentSpace1	Putamen	2267	Caudoputamen	0.8723912949183295
LatentSpace1	Putamen	2267	Nucleus accumbens	0.7237269412329816
LatentSpace1	Putamen	2267	Fundus of striatum	0.7221342625341775
LatentSpace1	Putamen	2267	Olfactory tubercle	0.6614136315421734
LatentSpace1	Putamen	2280	Caudoputamen	0.7626880687392964
LatentSpace1	Putamen	2280	Nucleus accumbens	0.6378026307361727
LatentSpace1	Putamen	2280	Fundus of striatum	0.6292448940153987
LatentSpace1	Putamen	2280	Olfactory tubercle	0.6050639337833815
LatentSpace1	Putamen	2343	Caudoputamen	0.9145538773317479
LatentSpace1	Putamen	2343	Nucleus accumbens	0.6965984324402718
LatentSpace1	Putamen	2343	Fundus of striatum	0.7039231519710966
LatentSpace1	Putamen	2343	Olfactory tubercle	0.6144762088576146
LatentSpace1	Putamen	2346	Caudoputamen	0.9414730163561418
LatentSpace1	Putamen	2346	Nucleus accumbens	0.7480628361687492
LatentSpace1	Putamen	2346	Fundus of striatum	0.745143586830586
LatentSpace1	Putamen	2346	Olfactory tubercle	0.6548846530539604
LatentSpace1	Putamen	2364	Caudoputamen	0.8963276078870149
LatentSpace1	Putamen	2364	Nucleus accumbens	0.8494364983483225
LatentSpace1	Putamen	2364	Fundus of striatum	0.82329674599898794
LatentSpace1	Putamen	2364	Olfactory tubercle	0.7829700661729897
LatentSpace1	Putamen	2386	Caudoputamen	0.9213908593039568
LatentSpace1	Putamen	2386	Nucleus accumbens	0.8462780942820761
LatentSpace1	Putamen	2386	Fundus of striatum	0.8284674004652995
LatentSpace1	Putamen	2386	Olfactory tubercle	0.7598777305651249
LatentSpace1	Putamen	2554	Caudoputamen	0.9113240954161187
LatentSpace1	Putamen	2554	Nucleus accumbens	0.7039690644252009
LatentSpace1	Putamen	2554	Fundus of striatum	0.7138619644515628
LatentSpace1	Putamen	2554	Olfactory tubercle	0.6260280502437165
LatentSpace1	Putamen	2578	Caudoputamen	0.9214588931957458
LatentSpace1	Putamen	2578	Nucleus accumbens	0.695035501611475
LatentSpace1	Putamen	2578	Fundus of striatum	0.6924641642344243
LatentSpace1	Putamen	2578	Olfactory tubercle	0.6062872801256434
LatentSpace1	Putamen	2625	Caudoputamen	0.8498179370271045
LatentSpace1	Putamen	2625	Nucleus accumbens	0.6414337140231915
LatentSpace1	Putamen	2625	Fundus of striatum	0.651671036184642
LatentSpace1	Putamen	2625	Olfactory tubercle	0.575835247944429
LatentSpace1	Putamen	2717	Caudoputamen	0.9096664979813484
LatentSpace1	Putamen	2717	Nucleus accumbens	0.7866719970761783
LatentSpace1	Putamen	2717	Fundus of striatum	0.7749728117144467
LatentSpace1	Putamen	2717	Olfactory tubercle	0.7075705256786117
LatentSpace1	Putamen	2775	Caudoputamen	0.9530107875550133
LatentSpace1	Putamen	2775	Nucleus accumbens	0.6874934136506354
LatentSpace1	Putamen	2775	Fundus of striatum	0.7095056181185413
LatentSpace1	Putamen	2775	Olfactory tubercle	0.590216891681968
LatentSpace1	Putamen	2849	Caudoputamen	0.9409412077389394
LatentSpace1	Putamen	2849	Nucleus accumbens	0.6894821414237617
LatentSpace1	Putamen	2849	Fundus of striatum	0.7071099764984627
LatentSpace1	Putamen	2849	Olfactory tubercle	0.598235933737065
LatentSpace1	Putamen	2869	Caudoputamen	0.9690915832869215
LatentSpace1	Putamen	2869	Nucleus accumbens	0.7576537099484846
LatentSpace1	Putamen	2869	Fundus of striatum	0.7653977079817196
LatentSpace1	Putamen	2869	Olfactory tubercle	0.6571562807679683
LatentSpace1	Putamen	2875	Caudoputamen	0.925508233159182
LatentSpace1	Putamen	2875	Nucleus accumbens	0.7266794839307759
LatentSpace1	Putamen	2875	Fundus of striatum	0.7391821117003001
LatentSpace1	Putamen	2875	Olfactory tubercle	0.6466385964426725
LatentSpace1	Putamen	2878	Caudoputamen	0.9398899076293632
LatentSpace1	Putamen	2878	Nucleus accumbens	0.6924055832089298
LatentSpace1	Putamen	2878	Fundus of striatum	0.7089933672513175
LatentSpace1	Putamen	2878	Olfactory tubercle	0.6035790866641194
LatentSpace1	Putamen	2984	Caudoputamen	0.9654579574274497
LatentSpace1	Putamen	2984	Nucleus accumbens	0.8042626719577857
LatentSpace1	Putamen	2984	Fundus of striatum	0.8174415362874263
LatentSpace1	Putamen	2984	Olfactory tubercle	0.7114039418667144
LatentSpace1	Putamen	3064	Caudoputamen	0.9200698344570163
LatentSpace1	Putamen	3064	Nucleus accumbens	0.7280108648081954
LatentSpace1	Putamen	3064	Fundus of striatum	0.7340592111175955
LatentSpace1	Putamen	3064	Olfactory tubercle	0.6431069698577546
LatentSpace1	Putamen	3286	Caudoputamen	0.9505860499202987
LatentSpace1	Putamen	3286	Nucleus accumbens	0.7406822542257588
LatentSpace1	Putamen	3286	Fundus of striatum	0.7512564812100563
LatentSpace1	Putamen	3286	Olfactory tubercle	0.6518423762529852
LatentSpace1	Putamen	3298	Caudoputamen	0.9580714344430077
LatentSpace1	Putamen	3298	Nucleus accumbens	0.7446474246583904
LatentSpace1	Putamen	3298	Fundus of striatum	0.7537359930063912
LatentSpace1	Putamen	3298	Olfactory tubercle	0.6485085971080954
LatentSpace1	Putamen	3301	Caudoputamen	0.9500078219747973
LatentSpace1	Putamen	3301	Nucleus accumbens	0.7519117358241015
LatentSpace1	Putamen	3301	Fundus of striatum	0.7443583679140483
LatentSpace1	Putamen	3301	Olfactory tubercle	0.6563199487088328
LatentSpace1	Putamen	3620	Caudoputamen	0.9655972072159366
LatentSpace1	Putamen	3620	Nucleus accumbens	0.7714639180428913
LatentSpace1	Putamen	3620	Fundus of striatum	0.7808146423306201
LatentSpace1	Putamen	3620	Olfactory tubercle	0.681065398891532
LatentSpace1	Putamen	3656	Caudoputamen	0.943212905679095
LatentSpace1	Putamen	3656	Nucleus accumbens	0.7626069611286271
LatentSpace1	Putamen	3656	Fundus of striatum	0.7668551942226092
LatentSpace1	Putamen	3656	Olfactory tubercle	0.6761932010699231
LatentSpace1	Nucleus accumbens	877	Caudoputamen	0.9497727621364404
LatentSpace1	Nucleus accumbens	877	Nucleus accumbens	0.8704544169092218
LatentSpace1	Nucleus accumbens	877	Fundus of striatum	0.8507266701711462
LatentSpace1	Nucleus accumbens	877	Olfactory tubercle	0.7816190404128244
LatentSpace1	Nucleus accumbens	921	Caudoputamen	0.9544689253087092
LatentSpace1	Nucleus accumbens	921	Nucleus accumbens	0.8344946790998331
LatentSpace1	Nucleus accumbens	921	Fundus of striatum	0.8273000498663355
LatentSpace1	Nucleus accumbens	921	Olfactory tubercle	0.7359653305163035
LatentSpace1	Nucleus accumbens	944	Caudoputamen	0.9518412236017509
LatentSpace1	Nucleus accumbens	944	Nucleus accumbens	0.7937733799252242
LatentSpace1	Nucleus accumbens	944	Fundus of striatum	0.8004888176003463
LatentSpace1	Nucleus accumbens	944	Olfactory tubercle	0.6950834148368724
LatentSpace1	Nucleus accumbens	945	Caudoputamen	0.9170688562031596
LatentSpace1	Nucleus accumbens	945	Nucleus accumbens	0.8657546196226432
LatentSpace1	Nucleus accumbens	945	Fundus of striatum	0.8634017432694067
LatentSpace1	Nucleus accumbens	945	Olfactory tubercle	0.7763316917826611
LatentSpace1	Nucleus accumbens	946	Caudoputamen	0.9489331260457384
LatentSpace1	Nucleus accumbens	946	Nucleus accumbens	0.8735387522814795
LatentSpace1	Nucleus accumbens	946	Fundus of striatum	0.8708897240467119
LatentSpace1	Nucleus accumbens	946	Olfactory tubercle	0.7751353323713741
LatentSpace1	Nucleus accumbens	968	Caudoputamen	0.9482319222016468
LatentSpace1	Nucleus accumbens	968	Nucleus accumbens	0.7931066493975849
LatentSpace1	Nucleus accumbens	968	Fundus of striatum	0.7864560510887443
LatentSpace1	Nucleus accumbens	968	Olfactory tubercle	0.6877246945332806
LatentSpace1	Nucleus accumbens	971	Caudoputamen	0.962696216930547
LatentSpace1	Nucleus accumbens	971	Nucleus accumbens	0.801634079426359
LatentSpace1	Nucleus accumbens	971	Fundus of striatum	0.8024738345130001
LatentSpace1	Nucleus accumbens	971	Olfactory tubercle	0.6929337770659824
LatentSpace1	Nucleus accumbens	1256	Caudoputamen	0.9472826346347593
LatentSpace1	Nucleus accumbens	1256	Nucleus accumbens	0.8513906951160436
LatentSpace1	Nucleus accumbens	1256	Fundus of striatum	0.8437728592668756
LatentSpace1	Nucleus accumbens	1256	Olfactory tubercle	0.7611092597123915
LatentSpace1	Nucleus accumbens	1715	Caudoputamen	0.3501177313403192
LatentSpace1	Nucleus accumbens	1715	Nucleus accumbens	0.3740790878745813
LatentSpace1	Nucleus accumbens	1715	Fundus of striatum	0.383544025546235
LatentSpace1	Nucleus accumbens	1715	Olfactory tubercle	0.3799987351318122
LatentSpace1	Nucleus accumbens	1848	Caudoputamen	0.9267397861530394
LatentSpace1	Nucleus accumbens	1848	Nucleus accumbens	0.8888281029222511
LatentSpace1	Nucleus accumbens	1848	Fundus of striatum	0.8675293071646621
LatentSpace1	Nucleus accumbens	1848	Olfactory tubercle	0.8046606808188823
LatentSpace1	Nucleus accumbens	2008	Caudoputamen	0.8924374661060991
LatentSpace1	Nucleus accumbens	2008	Nucleus accumbens	0.8908341448457654
LatentSpace1	Nucleus accumbens	2008	Fundus of striatum	0.8660124784374765
LatentSpace1	Nucleus accumbens	2008	Olfactory tubercle	0.8197000776196565
LatentSpace1	Nucleus accumbens	2378	Caudoputamen	0.851648001860724
LatentSpace1	Nucleus accumbens	2378	Nucleus accumbens	0.8827140549632996
LatentSpace1	Nucleus accumbens	2378	Fundus of striatum	0.8540316114028671
LatentSpace1	Nucleus accumbens	2378	Olfactory tubercle	0.8162719605444778
LatentSpace1	Nucleus accumbens	2421	Caudoputamen	0.8969747540687246
LatentSpace1	Nucleus accumbens	2421	Nucleus accumbens	0.906557473625337
LatentSpace1	Nucleus accumbens	2421	Fundus of striatum	0.8797685044615633
LatentSpace1	Nucleus accumbens	2421	Olfactory tubercle	0.8278533709637309
LatentSpace1	Nucleus accumbens	2778	Caudoputamen	0.9328851268173156
LatentSpace1	Nucleus accumbens	2778	Nucleus accumbens	0.8990768344559992
LatentSpace1	Nucleus accumbens	2778	Fundus of striatum	0.8819754613806552
LatentSpace1	Nucleus accumbens	2778	Olfactory tubercle	0.8143192409860479
LatentSpace1	Nucleus accumbens	3042	Caudoputamen	0.9261772684304131
LatentSpace1	Nucleus accumbens	3042	Nucleus accumbens	0.8818221818201009
LatentSpace1	Nucleus accumbens	3042	Fundus of striatum	0.8686652115232567
LatentSpace1	Nucleus accumbens	3042	Olfactory tubercle	0.8005073937691399
LatentSpace1	Nucleus accumbens	3300	Caudoputamen	0.9451292246566569
LatentSpace1	Nucleus accumbens	3300	Nucleus accumbens	0.8482001292369057
LatentSpace1	Nucleus accumbens	3300	Fundus of striatum	0.8299391439488386
LatentSpace1	Nucleus accumbens	3300	Olfactory tubercle	0.7597025124455665
LatentSpace1	Nucleus accumbens	3632	Caudoputamen	0.8523884174916353
LatentSpace1	Nucleus accumbens	3632	Nucleus accumbens	0.8675036727263528
LatentSpace1	Nucleus accumbens	3632	Fundus of striatum	0.8382666230630529
LatentSpace1	Nucleus accumbens	3632	Olfactory tubercle	0.8131940530021498
LatentSpace2	Caudate	12	Caudoputamen	0.9798415235581256
LatentSpace2	Caudate	12	Nucleus accumbens	0.8893150277038286
LatentSpace2	Caudate	12	Fundus of striatum	0.897156041001929
LatentSpace2	Caudate	12	Olfactory tubercle	0.8333923440663379
LatentSpace2	Caudate	136	Caudoputamen	0.9737440162203199
LatentSpace2	Caudate	136	Nucleus accumbens	0.849981642780328
LatentSpace2	Caudate	136	Fundus of striatum	0.860287685513294
LatentSpace2	Caudate	136	Olfactory tubercle	0.7868624824567811
LatentSpace2	Caudate	164	Caudoputamen	0.9730301062299411
LatentSpace2	Caudate	164	Nucleus accumbens	0.8563719910493132
LatentSpace2	Caudate	164	Fundus of striatum	0.855255885143571
LatentSpace2	Caudate	164	Olfactory tubercle	0.7937691907920996
LatentSpace2	Caudate	173	Caudoputamen	0.9474764054396481
LatentSpace2	Caudate	173	Nucleus accumbens	0.8649291857699929
LatentSpace2	Caudate	173	Fundus of striatum	0.8680268396916292
LatentSpace2	Caudate	173	Olfactory tubercle	0.8073423814508115
LatentSpace2	Caudate	218	Caudoputamen	0.9781347830127142
LatentSpace2	Caudate	218	Nucleus accumbens	0.8783649187465832
LatentSpace2	Caudate	218	Fundus of striatum	0.8685678797160274
LatentSpace2	Caudate	218	Olfactory tubercle	0.8150925411018207
LatentSpace2	Caudate	315	Caudoputamen	0.3637731439848977
LatentSpace2	Caudate	315	Nucleus accumbens	0.4409084601735182
LatentSpace2	Caudate	315	Fundus of striatum	0.47501619570032616
LatentSpace2	Caudate	315	Olfactory tubercle	0.44143849575882665
LatentSpace2	Caudate	422	Caudoputamen	0.9779820766702657
LatentSpace2	Caudate	422	Nucleus accumbens	0.8943373307831589
LatentSpace2	Caudate	422	Fundus of striatum	0.9119520092656203
LatentSpace2	Caudate	422	Olfactory tubercle	0.8379700992412833
LatentSpace2	Caudate	452	Caudoputamen	0.9703019914804707
LatentSpace2	Caudate	452	Nucleus accumbens	0.8725923025056054
LatentSpace2	Caudate	452	Fundus of striatum	0.8885169635588209
LatentSpace2	Caudate	452	Olfactory tubercle	0.8144946318097624
LatentSpace2	Caudate	483	Caudoputamen	0.9771126727801325
LatentSpace2	Caudate	483	Nucleus accumbens	0.8681475685218137
LatentSpace2	Caudate	483	Fundus of striatum	0.8812990916534963
LatentSpace2	Caudate	483	Olfactory tubercle	0.8058779178071263
LatentSpace2	Caudate	487	Caudoputamen	0.9731365400198564
LatentSpace2	Caudate	487	Nucleus accumbens	0.8681540703287243
LatentSpace2	Caudate	487	Fundus of striatum	0.8775615764949927
LatentSpace2	Caudate	487	Olfactory tubercle	0.8079714426987614
LatentSpace2	Caudate	490	Caudoputamen	0.9606942851526472
LatentSpace2	Caudate	490	Nucleus accumbens	0.8331938241787699
LatentSpace2	Caudate	490	Fundus of striatum	0.8500783316802587
LatentSpace2	Caudate	490	Olfactory tubercle	0.7709339159690367
LatentSpace2	Caudate	512	Caudoputamen	0.9738633560295906
LatentSpace2	Caudate	512	Nucleus accumbens	0.9013951673190767
LatentSpace2	Caudate	512	Fundus of striatum	0.9097061220535536
LatentSpace2	Caudate	512	Olfactory tubercle	0.846447094004724
LatentSpace2	Caudate	557	Caudoputamen	0.9732839028634015
LatentSpace2	Caudate	557	Nucleus accumbens	0.8957995326242547
LatentSpace2	Caudate	557	Fundus of striatum	0.9065326453468784
LatentSpace2	Caudate	557	Olfactory tubercle	0.8371526618704674
LatentSpace2	Caudate	647	Caudoputamen	0.9701188400833938
LatentSpace2	Caudate	647	Nucleus accumbens	0.8710627654915716
LatentSpace2	Caudate	647	Fundus of striatum	0.8492286928985945
LatentSpace2	Caudate	647	Olfactory tubercle	0.8069933137080201
LatentSpace2	Caudate	656	Caudoputamen	0.9672216625907674
LatentSpace2	Caudate	656	Nucleus accumbens	0.9024114099977432
LatentSpace2	Caudate	656	Fundus of striatum	0.8783882122646959
LatentSpace2	Caudate	656	Olfactory tubercle	0.8429668316290698
LatentSpace2	Caudate	657	Caudoputamen	0.966517175382672
LatentSpace2	Caudate	657	Nucleus accumbens	0.8520061778886897
LatentSpace2	Caudate	657	Fundus of striatum	0.8297798509780261
LatentSpace2	Caudate	657	Olfactory tubercle	0.7871620904477111
LatentSpace2	Caudate	786	Caudoputamen	0.963778299903663
LatentSpace2	Caudate	786	Nucleus accumbens	0.906157052887668
LatentSpace2	Caudate	786	Fundus of striatum	0.8978075512519959
LatentSpace2	Caudate	786	Olfactory tubercle	0.8552396930988266
LatentSpace2	Caudate	796	Caudoputamen	0.9680602887714149
LatentSpace2	Caudate	796	Nucleus accumbens	0.9121495329553553
LatentSpace2	Caudate	796	Fundus of striatum	0.9095084380191908
LatentSpace2	Caudate	796	Olfactory tubercle	0.8597895384135933
LatentSpace2	Caudate	885	Caudoputamen	0.9731393760830288
LatentSpace2	Caudate	885	Nucleus accumbens	0.8906761055023474
LatentSpace2	Caudate	885	Fundus of striatum	0.8752326745758023
LatentSpace2	Caudate	885	Olfactory tubercle	0.8297139012959382
LatentSpace2	Caudate	887	Caudoputamen	0.9778286901085346
LatentSpace2	Caudate	887	Nucleus accumbens	0.8722898854204779
LatentSpace2	Caudate	887	Fundus of striatum	0.8740481562205494
LatentSpace2	Caudate	887	Olfactory tubercle	0.808189603816765
LatentSpace2	Caudate	916	Caudoputamen	0.965282055788641
LatentSpace2	Caudate	916	Nucleus accumbens	0.8682647940413873
LatentSpace2	Caudate	916	Fundus of striatum	0.8645364393532138
LatentSpace2	Caudate	916	Olfactory tubercle	0.8084151316108223
LatentSpace2	Caudate	917	Caudoputamen	0.8831059452699472
LatentSpace2	Caudate	917	Nucleus accumbens	0.8137889235979053
LatentSpace2	Caudate	917	Fundus of striatum	0.8119465147308682
LatentSpace2	Caudate	917	Olfactory tubercle	0.7616808412131435
LatentSpace2	Caudate	918	Caudoputamen	0.8993116813425249
LatentSpace2	Caudate	918	Nucleus accumbens	0.8287735781601163
LatentSpace2	Caudate	918	Fundus of striatum	0.8252819052144966
LatentSpace2	Caudate	918	Olfactory tubercle	0.774946398329996
LatentSpace2	Caudate	924	Caudoputamen	0.9551992348709343
LatentSpace2	Caudate	924	Nucleus accumbens	0.8277394683287116
LatentSpace2	Caudate	924	Fundus of striatum	0.8350538219921816
LatentSpace2	Caudate	924	Olfactory tubercle	0.7658726417156645
LatentSpace2	Caudate	929	Caudoputamen	0.9775475774352471
LatentSpace2	Caudate	929	Nucleus accumbens	0.8762803725013731
LatentSpace2	Caudate	929	Fundus of striatum	0.8670922746202308
LatentSpace2	Caudate	929	Olfactory tubercle	0.8152913206785958
LatentSpace2	Caudate	933	Caudoputamen	0.9382866369776731
LatentSpace2	Caudate	933	Nucleus accumbens	0.820711577790008
LatentSpace2	Caudate	933	Fundus of striatum	0.8259783407055112
LatentSpace2	Caudate	933	Olfactory tubercle	0.7589474553739612
LatentSpace2	Caudate	967	Caudoputamen	0.9724828098201324
LatentSpace2	Caudate	967	Nucleus accumbens	0.8865082594037449
LatentSpace2	Caudate	967	Fundus of striatum	0.907615000772902
LatentSpace2	Caudate	967	Olfactory tubercle	0.8330475590676877
LatentSpace2	Caudate	979	Caudoputamen	0.9549560936223783
LatentSpace2	Caudate	979	Nucleus accumbens	0.8375651995393226
LatentSpace2	Caudate	979	Fundus of striatum	0.860970669198818
LatentSpace2	Caudate	979	Olfactory tubercle	0.7927807572954778
LatentSpace2	Caudate	1022	Caudoputamen	0.9768345968359746
LatentSpace2	Caudate	1022	Nucleus accumbens	0.8913697373292673
LatentSpace2	Caudate	1022	Fundus of striatum	0.886058083431709
LatentSpace2	Caudate	1022	Olfactory tubercle	0.8304126467373923
LatentSpace2	Caudate	1043	Caudoputamen	0.9736350782607333
LatentSpace2	Caudate	1043	Nucleus accumbens	0.8943414305742113
LatentSpace2	Caudate	1043	Fundus of striatum	0.8923394348353769
LatentSpace2	Caudate	1043	Olfactory tubercle	0.8334002009194604
LatentSpace2	Caudate	1239	Caudoputamen	0.9862249668776288
LatentSpace2	Caudate	1239	Nucleus accumbens	0.8546907778106781
LatentSpace2	Caudate	1239	Fundus of striatum	0.8514146750980917
LatentSpace2	Caudate	1239	Olfactory tubercle	0.7870868939943549
LatentSpace2	Caudate	1247	Caudoputamen	0.9853096248631695
LatentSpace2	Caudate	1247	Nucleus accumbens	0.8656641809468469
LatentSpace2	Caudate	1247	Fundus of striatum	0.8746080638879509
LatentSpace2	Caudate	1247	Olfactory tubercle	0.8033417813552224
LatentSpace2	Caudate	1248	Caudoputamen	0.9787422085116467
LatentSpace2	Caudate	1248	Nucleus accumbens	0.872794138408105
LatentSpace2	Caudate	1248	Fundus of striatum	0.8830269850489504
LatentSpace2	Caudate	1248	Olfactory tubercle	0.8130398812556243
LatentSpace2	Caudate	1249	Caudoputamen	0.9668634453632212
LatentSpace2	Caudate	1249	Nucleus accumbens	0.8066926131955332
LatentSpace2	Caudate	1249	Fundus of striatum	0.818533605919601
LatentSpace2	Caudate	1249	Olfactory tubercle	0.7426703315763891
LatentSpace2	Caudate	1254	Caudoputamen	0.9733656226421631
LatentSpace2	Caudate	1254	Nucleus accumbens	0.8402024348057515
LatentSpace2	Caudate	1254	Fundus of striatum	0.8479495479253567
LatentSpace2	Caudate	1254	Olfactory tubercle	0.7782234799398516
LatentSpace2	Caudate	1306	Caudoputamen	0.979229562942278
LatentSpace2	Caudate	1306	Nucleus accumbens	0.8436072758636219
LatentSpace2	Caudate	1306	Fundus of striatum	0.859315065190592
LatentSpace2	Caudate	1306	Olfactory tubercle	0.7815089754613798
LatentSpace2	Caudate	1458	Caudoputamen	0.9645468424232398
LatentSpace2	Caudate	1458	Nucleus accumbens	0.8873113394130067
LatentSpace2	Caudate	1458	Fundus of striatum	0.9030247346854994
LatentSpace2	Caudate	1458	Olfactory tubercle	0.8300883540510113
LatentSpace2	Caudate	1473	Caudoputamen	0.43421399881503064
LatentSpace2	Caudate	1473	Nucleus accumbens	0.5967714841903766
LatentSpace2	Caudate	1473	Fundus of striatum	0.5569647868405112
LatentSpace2	Caudate	1473	Olfactory tubercle	0.57419323866726
LatentSpace2	Caudate	1486	Caudoputamen	0.9779057818881857
LatentSpace2	Caudate	1486	Nucleus accumbens	0.9001255718326424
LatentSpace2	Caudate	1486	Fundus of striatum	0.9004860296603099
LatentSpace2	Caudate	1486	Olfactory tubercle	0.8432383218369589
LatentSpace2	Caudate	1503	Caudoputamen	0.981234139009905
LatentSpace2	Caudate	1503	Nucleus accumbens	0.8841348078065604
LatentSpace2	Caudate	1503	Fundus of striatum	0.8921272028179591
LatentSpace2	Caudate	1503	Olfactory tubercle	0.8223524383754617
LatentSpace2	Caudate	1511	Caudoputamen	0.9815214687672646
LatentSpace2	Caudate	1511	Nucleus accumbens	0.8889944786681242
LatentSpace2	Caudate	1511	Fundus of striatum	0.8912419064389159
LatentSpace2	Caudate	1511	Olfactory tubercle	0.8277545674487985
LatentSpace2	Caudate	1674	Caudoputamen	0.9872161214780498
LatentSpace2	Caudate	1674	Nucleus accumbens	0.866912614451203
LatentSpace2	Caudate	1674	Fundus of striatum	0.8745018847523214
LatentSpace2	Caudate	1674	Olfactory tubercle	0.805202833971182
LatentSpace2	Caudate	1675	Caudoputamen	0.9882106598496958
LatentSpace2	Caudate	1675	Nucleus accumbens	0.8512119129514814
LatentSpace2	Caudate	1675	Fundus of striatum	0.8667757682684413
LatentSpace2	Caudate	1675	Olfactory tubercle	0.7877828349961832
LatentSpace2	Caudate	1700	Caudoputamen	0.9837642063817796
LatentSpace2	Caudate	1700	Nucleus accumbens	0.8554099935470465
LatentSpace2	Caudate	1700	Fundus of striatum	0.8478212943970085
LatentSpace2	Caudate	1700	Olfactory tubercle	0.7911079946864475
LatentSpace2	Caudate	1707	Caudoputamen	0.9897285704524079
LatentSpace2	Caudate	1707	Nucleus accumbens	0.8466692470701426
LatentSpace2	Caudate	1707	Fundus of striatum	0.8631809108527261
LatentSpace2	Caudate	1707	Olfactory tubercle	0.7808241410897823
LatentSpace2	Caudate	1727	Caudoputamen	0.9835384954471343
LatentSpace2	Caudate	1727	Nucleus accumbens	0.8149434625010651
LatentSpace2	Caudate	1727	Fundus of striatum	0.8205580416501868
LatentSpace2	Caudate	1727	Olfactory tubercle	0.750777157010611
LatentSpace2	Caudate	1737	Caudoputamen	0.9846668627099661
LatentSpace2	Caudate	1737	Nucleus accumbens	0.8299644919704656
LatentSpace2	Caudate	1737	Fundus of striatum	0.8422533771793208
LatentSpace2	Caudate	1737	Olfactory tubercle	0.7696619060381982
LatentSpace2	Caudate	1781	Caudoputamen	0.9815984684410974
LatentSpace2	Caudate	1781	Nucleus accumbens	0.8750297108534427
LatentSpace2	Caudate	1781	Fundus of striatum	0.872318081726629
LatentSpace2	Caudate	1781	Olfactory tubercle	0.8136668632236025
LatentSpace2	Caudate	1782	Caudoputamen	0.9825398171308163
LatentSpace2	Caudate	1782	Nucleus accumbens	0.8533298305248952
LatentSpace2	Caudate	1782	Fundus of striatum	0.858486801233446
LatentSpace2	Caudate	1782	Olfactory tubercle	0.7911577826704611
LatentSpace2	Caudate	1790	Caudoputamen	0.9865406066758158
LatentSpace2	Caudate	1790	Nucleus accumbens	0.8714039019880627
LatentSpace2	Caudate	1790	Fundus of striatum	0.8699754315828025
LatentSpace2	Caudate	1790	Olfactory tubercle	0.8101818363979894
LatentSpace2	Caudate	1831	Caudoputamen	0.3941647714025152
LatentSpace2	Caudate	1831	Nucleus accumbens	0.3919706534762551
LatentSpace2	Caudate	1831	Fundus of striatum	0.3486126430423401
LatentSpace2	Caudate	1831	Olfactory tubercle	0.38583940146826795
LatentSpace2	Caudate	1846	Caudoputamen	0.9698639551088005
LatentSpace2	Caudate	1846	Nucleus accumbens	0.8972500675832428
LatentSpace2	Caudate	1846	Fundus of striatum	0.9077332569741344
LatentSpace2	Caudate	1846	Olfactory tubercle	0.8430392947334895
LatentSpace2	Caudate	1967	Caudoputamen	0.9839723288756131
LatentSpace2	Caudate	1967	Nucleus accumbens	0.8971971627935267
LatentSpace2	Caudate	1967	Fundus of striatum	0.9067790977376222
LatentSpace2	Caudate	1967	Olfactory tubercle	0.8384479806933851
LatentSpace2	Caudate	1986	Caudoputamen	0.9796848714981069
LatentSpace2	Caudate	1986	Nucleus accumbens	0.8738779069257278
LatentSpace2	Caudate	1986	Fundus of striatum	0.8899816806663575
LatentSpace2	Caudate	1986	Olfactory tubercle	0.8162046281988338
LatentSpace2	Caudate	2030	Caudoputamen	0.9808238557734955
LatentSpace2	Caudate	2030	Nucleus accumbens	0.8784943771434724
LatentSpace2	Caudate	2030	Fundus of striatum	0.893119179929934
LatentSpace2	Caudate	2030	Olfactory tubercle	0.8206869319273987
LatentSpace2	Caudate	2031	Caudoputamen	0.9804727535698721
LatentSpace2	Caudate	2031	Nucleus accumbens	0.8909248624629179
LatentSpace2	Caudate	2031	Fundus of striatum	0.8996385830795545
LatentSpace2	Caudate	2031	Olfactory tubercle	0.8342303086166587
LatentSpace2	Caudate	2053	Caudoputamen	0.9806991633684468
LatentSpace2	Caudate	2053	Nucleus accumbens	0.8815578307836102
LatentSpace2	Caudate	2053	Fundus of striatum	0.8780259491121265
LatentSpace2	Caudate	2053	Olfactory tubercle	0.8202898999027725
LatentSpace2	Caudate	2111	Caudoputamen	0.9818939539181573
LatentSpace2	Caudate	2111	Nucleus accumbens	0.8658222126064437
LatentSpace2	Caudate	2111	Fundus of striatum	0.8832895619261767
LatentSpace2	Caudate	2111	Olfactory tubercle	0.8034957109835209
LatentSpace2	Caudate	2161	Caudoputamen	0.9689428716929567
LatentSpace2	Caudate	2161	Nucleus accumbens	0.7899328232852503
LatentSpace2	Caudate	2161	Fundus of striatum	0.7960375178682241
LatentSpace2	Caudate	2161	Olfactory tubercle	0.7190387626958038
LatentSpace2	Caudate	2165	Caudoputamen	0.9790563219132344
LatentSpace2	Caudate	2165	Nucleus accumbens	0.8639157494420434
LatentSpace2	Caudate	2165	Fundus of striatum	0.8684875296327288
LatentSpace2	Caudate	2165	Olfactory tubercle	0.8028558535774761
LatentSpace2	Caudate	2203	Caudoputamen	0.9603751897522034
LatentSpace2	Caudate	2203	Nucleus accumbens	0.8631536804030311
LatentSpace2	Caudate	2203	Fundus of striatum	0.8708485501071714
LatentSpace2	Caudate	2203	Olfactory tubercle	0.8044297213268826
LatentSpace2	Caudate	2256	Caudoputamen	0.9745832068187635
LatentSpace2	Caudate	2256	Nucleus accumbens	0.8882556520143231
LatentSpace2	Caudate	2256	Fundus of striatum	0.8764181776503461
LatentSpace2	Caudate	2256	Olfactory tubercle	0.830745725209528
LatentSpace2	Caudate	2285	Caudoputamen	0.8491342353474836
LatentSpace2	Caudate	2285	Nucleus accumbens	0.8015930372020561
LatentSpace2	Caudate	2285	Fundus of striatum	0.8014478794410266
LatentSpace2	Caudate	2285	Olfactory tubercle	0.7591493325029689
LatentSpace2	Caudate	2344	Caudoputamen	0.9786176077656016
LatentSpace2	Caudate	2344	Nucleus accumbens	0.8614740609709906
LatentSpace2	Caudate	2344	Fundus of striatum	0.8607267639118481
LatentSpace2	Caudate	2344	Olfactory tubercle	0.7995813353132925
LatentSpace2	Caudate	2349	Caudoputamen	0.977394146546274
LatentSpace2	Caudate	2349	Nucleus accumbens	0.8508930919547537
LatentSpace2	Caudate	2349	Fundus of striatum	0.8607635170046487
LatentSpace2	Caudate	2349	Olfactory tubercle	0.7896447307604894
LatentSpace2	Caudate	2365	Caudoputamen	0.9548746722452471
LatentSpace2	Caudate	2365	Nucleus accumbens	0.9256566256629762
LatentSpace2	Caudate	2365	Fundus of striatum	0.9080508616971177
LatentSpace2	Caudate	2365	Olfactory tubercle	0.8738804795904804
LatentSpace2	Caudate	2387	Caudoputamen	0.9304344557487778
LatentSpace2	Caudate	2387	Nucleus accumbens	0.942962476313802
LatentSpace2	Caudate	2387	Fundus of striatum	0.9502964073268224
LatentSpace2	Caudate	2387	Olfactory tubercle	0.903102574423295
LatentSpace2	Caudate	2626	Caudoputamen	0.9763353202173944
LatentSpace2	Caudate	2626	Nucleus accumbens	0.8263000711168172
LatentSpace2	Caudate	2626	Fundus of striatum	0.8295244441913203
LatentSpace2	Caudate	2626	Olfactory tubercle	0.7612447238898156
LatentSpace2	Caudate	2694	Caudoputamen	0.9775558815428618
LatentSpace2	Caudate	2694	Nucleus accumbens	0.8914149700198654
LatentSpace2	Caudate	2694	Fundus of striatum	0.8935978368080645
LatentSpace2	Caudate	2694	Olfactory tubercle	0.8319181558436258
LatentSpace2	Caudate	2710	Caudoputamen	0.9775786780179071
LatentSpace2	Caudate	2710	Nucleus accumbens	0.8592771435689482
LatentSpace2	Caudate	2710	Fundus of striatum	0.8624386965630857
LatentSpace2	Caudate	2710	Olfactory tubercle	0.7983472196830083
LatentSpace2	Caudate	2711	Caudoputamen	0.9782529978204159
LatentSpace2	Caudate	2711	Nucleus accumbens	0.9033554943166895
LatentSpace2	Caudate	2711	Fundus of striatum	0.8958174366743681
LatentSpace2	Caudate	2711	Olfactory tubercle	0.8480710656106005
LatentSpace2	Caudate	2777	Caudoputamen	0.9857813726765684
LatentSpace2	Caudate	2777	Nucleus accumbens	0.8732224061033744
LatentSpace2	Caudate	2777	Fundus of striatum	0.8737659104517888
LatentSpace2	Caudate	2777	Olfactory tubercle	0.8106157668823005
LatentSpace2	Caudate	2779	Caudoputamen	0.9828172678853483
LatentSpace2	Caudate	2779	Nucleus accumbens	0.8538590144716144
LatentSpace2	Caudate	2779	Fundus of striatum	0.8570783434835416
LatentSpace2	Caudate	2779	Olfactory tubercle	0.7899528008757469
LatentSpace2	Caudate	2811	Caudoputamen	0.9870689545532432
LatentSpace2	Caudate	2811	Nucleus accumbens	0.8571568710401385
LatentSpace2	Caudate	2811	Fundus of striatum	0.859458420849181
LatentSpace2	Caudate	2811	Olfactory tubercle	0.7944562834964121
LatentSpace2	Caudate	2812	Caudoputamen	0.9858402946687072
LatentSpace2	Caudate	2812	Nucleus accumbens	0.8841673270178511
LatentSpace2	Caudate	2812	Fundus of striatum	0.8848878573483955
LatentSpace2	Caudate	2812	Olfactory tubercle	0.8266567652105901
LatentSpace2	Caudate	2844	Caudoputamen	0.942462804824597
LatentSpace2	Caudate	2844	Nucleus accumbens	0.8279662018205912
LatentSpace2	Caudate	2844	Fundus of striatum	0.8252905975846349
LatentSpace2	Caudate	2844	Olfactory tubercle	0.7676706104829606
LatentSpace2	Caudate	2981	Caudoputamen	0.9876432730226412
LatentSpace2	Caudate	2981	Nucleus accumbens	0.8730386676701158
LatentSpace2	Caudate	2981	Fundus of striatum	0.8850430445920009
LatentSpace2	Caudate	2981	Olfactory tubercle	0.8138639294865875
LatentSpace2	Caudate	3019	Caudoputamen	0.9797152498742215
LatentSpace2	Caudate	3019	Nucleus accumbens	0.8750428595968984
LatentSpace2	Caudate	3019	Fundus of striatum	0.8865300126445554
LatentSpace2	Caudate	3019	Olfactory tubercle	0.8163899316692369
LatentSpace2	Caudate	3061	Caudoputamen	0.9787091643967872
LatentSpace2	Caudate	3061	Nucleus accumbens	0.9002328357579027
LatentSpace2	Caudate	3061	Fundus of striatum	0.8964890549653344
LatentSpace2	Caudate	3061	Olfactory tubercle	0.8431990254755322
LatentSpace2	Caudate	3081	Caudoputamen	0.9650566803978268
LatentSpace2	Caudate	3081	Nucleus accumbens	0.920913451327742
LatentSpace2	Caudate	3081	Fundus of striatum	0.92142027649904
LatentSpace2	Caudate	3081	Olfactory tubercle	0.8687119564214048
LatentSpace2	Caudate	3279	Caudoputamen	0.9632945595629844
LatentSpace2	Caudate	3279	Nucleus accumbens	0.9140739797770261
LatentSpace2	Caudate	3279	Fundus of striatum	0.9259728180554176
LatentSpace2	Caudate	3279	Olfactory tubercle	0.863230430112491
LatentSpace2	Caudate	3287	Caudoputamen	0.9802209722961033
LatentSpace2	Caudate	3287	Nucleus accumbens	0.8815042032458607
LatentSpace2	Caudate	3287	Fundus of striatum	0.8795325008534135
LatentSpace2	Caudate	3287	Olfactory tubercle	0.8200896902259173
LatentSpace2	Caudate	3299	Caudoputamen	0.9856230858154907
LatentSpace2	Caudate	3299	Nucleus accumbens	0.8772346786230348
LatentSpace2	Caudate	3299	Fundus of striatum	0.8851569998319269
LatentSpace2	Caudate	3299	Olfactory tubercle	0.8170277979049207
LatentSpace2	Caudate	3302	Caudoputamen	0.9695424307550653
LatentSpace2	Caudate	3302	Nucleus accumbens	0.900386679882468
LatentSpace2	Caudate	3302	Fundus of striatum	0.9110766967541453
LatentSpace2	Caudate	3302	Olfactory tubercle	0.8463195525523867
LatentSpace2	Caudate	3426	Caudoputamen	0.984632245495083
LatentSpace2	Caudate	3426	Nucleus accumbens	0.8415921844744311
LatentSpace2	Caudate	3426	Fundus of striatum	0.8548047704097558
LatentSpace2	Caudate	3426	Olfactory tubercle	0.776982217420386
LatentSpace2	Caudate	3512	Caudoputamen	0.9814355084787897
LatentSpace2	Caudate	3512	Nucleus accumbens	0.8841563345846374
LatentSpace2	Caudate	3512	Fundus of striatum	0.887540068546994
LatentSpace2	Caudate	3512	Olfactory tubercle	0.8257942076768372
LatentSpace2	Caudate	3513	Caudoputamen	0.9797967687145621
LatentSpace2	Caudate	3513	Nucleus accumbens	0.8917190231372296
LatentSpace2	Caudate	3513	Fundus of striatum	0.8929600293847789
LatentSpace2	Caudate	3513	Olfactory tubercle	0.8326232520233632
LatentSpace2	Caudate	3621	Caudoputamen	0.9737016686828729
LatentSpace2	Caudate	3621	Nucleus accumbens	0.930494098618397
LatentSpace2	Caudate	3621	Fundus of striatum	0.9243317648446957
LatentSpace2	Caudate	3621	Olfactory tubercle	0.8774961372081206
LatentSpace2	Caudate	3657	Caudoputamen	0.9749123662989777
LatentSpace2	Caudate	3657	Nucleus accumbens	0.8912339666785432
LatentSpace2	Caudate	3657	Fundus of striatum	0.9026264862348798
LatentSpace2	Caudate	3657	Olfactory tubercle	0.8338931125728283
LatentSpace2	Caudate	3662	Caudoputamen	0.9652106166324863
LatentSpace2	Caudate	3662	Nucleus accumbens	0.9133132452661115
LatentSpace2	Caudate	3662	Fundus of striatum	0.9179873140399262
LatentSpace2	Caudate	3662	Olfactory tubercle	0.8606633933589346
LatentSpace2	Caudate	3663	Caudoputamen	0.9734424413564261
LatentSpace2	Caudate	3663	Nucleus accumbens	0.9169539432872479
LatentSpace2	Caudate	3663	Fundus of striatum	0.9152613283253983
LatentSpace2	Caudate	3663	Olfactory tubercle	0.8636737982898776
LatentSpace2	Putamen	60	Caudoputamen	0.8345472588183112
LatentSpace2	Putamen	60	Nucleus accumbens	0.7745497951199412
LatentSpace2	Putamen	60	Fundus of striatum	0.7741481420599036
LatentSpace2	Putamen	60	Olfactory tubercle	0.7252353659602155
LatentSpace2	Putamen	103	Caudoputamen	0.9131565570275991
LatentSpace2	Putamen	103	Nucleus accumbens	0.8694051124150648
LatentSpace2	Putamen	103	Fundus of striatum	0.8738333452002206
LatentSpace2	Putamen	103	Olfactory tubercle	0.8190337937869494
LatentSpace2	Putamen	137	Caudoputamen	0.9278470719075961
LatentSpace2	Putamen	137	Nucleus accumbens	0.7905835435666637
LatentSpace2	Putamen	137	Fundus of striatum	0.805351952827009
LatentSpace2	Putamen	137	Olfactory tubercle	0.7291670058186543
LatentSpace2	Putamen	165	Caudoputamen	0.9265633085721949
LatentSpace2	Putamen	165	Nucleus accumbens	0.8126704267054671
LatentSpace2	Putamen	165	Fundus of striatum	0.8243384603027761
LatentSpace2	Putamen	165	Olfactory tubercle	0.754990734018549
LatentSpace2	Putamen	174	Caudoputamen	0.9145373822032047
LatentSpace2	Putamen	174	Nucleus accumbens	0.7976937763848675
LatentSpace2	Putamen	174	Fundus of striatum	0.8129462373350668
LatentSpace2	Putamen	174	Olfactory tubercle	0.7405013323860056
LatentSpace2	Putamen	423	Caudoputamen	0.9675614720413293
LatentSpace2	Putamen	423	Nucleus accumbens	0.8627919805902116
LatentSpace2	Putamen	423	Fundus of striatum	0.8846834111239519
LatentSpace2	Putamen	423	Olfactory tubercle	0.8037842132918283
LatentSpace2	Putamen	451	Caudoputamen	0.9643761270532804
LatentSpace2	Putamen	451	Nucleus accumbens	0.8607729519723871
LatentSpace2	Putamen	451	Fundus of striatum	0.8843306994365364
LatentSpace2	Putamen	451	Olfactory tubercle	0.8029744448093934
LatentSpace2	Putamen	455	Caudoputamen	0.9492359296832913
LatentSpace2	Putamen	455	Nucleus accumbens	0.8547495121520478
LatentSpace2	Putamen	455	Fundus of striatum	0.8758770592241332
LatentSpace2	Putamen	455	Olfactory tubercle	0.7975146843610901
LatentSpace2	Putamen	499	Caudoputamen	0.9646045961523313
LatentSpace2	Putamen	499	Nucleus accumbens	0.894826703462315
LatentSpace2	Putamen	499	Fundus of striatum	0.8933667112314905
LatentSpace2	Putamen	499	Olfactory tubercle	0.8381049640389373
LatentSpace2	Putamen	625	Caudoputamen	0.9615755203930829
LatentSpace2	Putamen	625	Nucleus accumbens	0.8994294689810155
LatentSpace2	Putamen	625	Fundus of striatum	0.8667183387640918
LatentSpace2	Putamen	625	Olfactory tubercle	0.8385074750982598
LatentSpace2	Putamen	648	Caudoputamen	0.9664719899258463
LatentSpace2	Putamen	648	Nucleus accumbens	0.9065327860341836
LatentSpace2	Putamen	648	Fundus of striatum	0.875126478939619
LatentSpace2	Putamen	648	Olfactory tubercle	0.8448462240243849
LatentSpace2	Putamen	649	Caudoputamen	0.9706209571001542
LatentSpace2	Putamen	649	Nucleus accumbens	0.8872463258272455
LatentSpace2	Putamen	649	Fundus of striatum	0.8639685636426666
LatentSpace2	Putamen	649	Olfactory tubercle	0.82489855101479
LatentSpace2	Putamen	652	Caudoputamen	0.9355899540502007
LatentSpace2	Putamen	652	Nucleus accumbens	0.8263181209452042
LatentSpace2	Putamen	652	Fundus of striatum	0.8054455218307562
LatentSpace2	Putamen	652	Olfactory tubercle	0.7619868143348107
LatentSpace2	Putamen	876	Caudoputamen	0.96920921031006535
LatentSpace2	Putamen	876	Nucleus accumbens	0.8892489396313441
LatentSpace2	Putamen	876	Fundus of striatum	0.8749603004907873
LatentSpace2	Putamen	876	Olfactory tubercle	0.8309567830201552
LatentSpace2	Putamen	886	Caudoputamen	0.9735794762958858
LatentSpace2	Putamen	886	Nucleus accumbens	0.891322901855878
LatentSpace2	Putamen	886	Fundus of striatum	0.8793388272273156
LatentSpace2	Putamen	886	Olfactory tubercle	0.82963621011035
LatentSpace2	Putamen	888	Caudoputamen	0.9755541951337249
LatentSpace2	Putamen	888	Nucleus accumbens	0.8845432679790958
LatentSpace2	Putamen	888	Fundus of striatum	0.873145133016169
LatentSpace2	Putamen	888	Olfactory tubercle	0.8255328289023528
LatentSpace2	Putamen	925	Caudoputamen	0.9260846799105636
LatentSpace2	Putamen	925	Nucleus accumbens	0.8008146117807132
LatentSpace2	Putamen	925	Fundus of striatum	0.8143916660296691
LatentSpace2	Putamen	925	Olfactory tubercle	0.7443309417664727
LatentSpace2	Putamen	927	Caudoputamen	0.9200683169898172
LatentSpace2	Putamen	927	Nucleus accumbens	0.8189060818268914
LatentSpace2	Putamen	927	Fundus of striatum	0.8305944743740672
LatentSpace2	Putamen	927	Olfactory tubercle	0.764500877658169
LatentSpace2	Putamen	928	Caudoputamen	0.8872480697097456
LatentSpace2	Putamen	928	Nucleus accumbens	0.781671525945334
LatentSpace2	Putamen	928	Fundus of striatum	0.7938309759618251
LatentSpace2	Putamen	928	Olfactory tubercle	0.729693270537146
LatentSpace2	Putamen	936	Caudoputamen	0.8963719932886798
LatentSpace2	Putamen	936	Nucleus accumbens	0.7737850406876677
LatentSpace2	Putamen	936	Fundus of striatum	0.7886422342853194
LatentSpace2	Putamen	936	Olfactory tubercle	0.7182986647651499
LatentSpace2	Putamen	980	Caudoputamen	0.9701330477118382
LatentSpace2	Putamen	980	Nucleus accumbens	0.8772438971908587
LatentSpace2	Putamen	980	Fundus of striatum	0.8846290779312298
LatentSpace2	Putamen	980	Olfactory tubercle	0.816273821901733
LatentSpace2	Putamen	1044	Caudoputamen	0.9727831656380608
LatentSpace2	Putamen	1044	Nucleus accumbens	0.8529459867773592
LatentSpace2	Putamen	1044	Fundus of striatum	0.8458250988458198
LatentSpace2	Putamen	1044	Olfactory tubercle	0.7878858545708649
LatentSpace2	Putamen	1048	Caudoputamen	0.97984342005852465
LatentSpace2	Putamen	1048	Nucleus accumbens	0.8848408539848426
LatentSpace2	Putamen	1048	Fundus of striatum	0.8807356020882235
LatentSpace2	Putamen	1048	Olfactory tubercle	0.8243279504881309
LatentSpace2	Putamen	1240	Caudoputamen	0.9808437378101185
LatentSpace2	Putamen	1240	Nucleus accumbens	0.8633610676457737
LatentSpace2	Putamen	1240	Fundus of striatum	0.8619722579368302
LatentSpace2	Putamen	1240	Olfactory tubercle	0.8002163214211737
LatentSpace2	Putamen	1242	Caudoputamen	0.9804677905856529
LatentSpace2	Putamen	1242	Nucleus accumbens	0.8091887410834693
LatentSpace2	Putamen	1242	Fundus of striatum	0.828303992684659
LatentSpace2	Putamen	1242	Olfactory tubercle	0.7429371991961448
LatentSpace2	Putamen	1244	Caudoputamen	0.9801886689049821
LatentSpace2	Putamen	1244	Nucleus accumbens	0.8090968615884373
LatentSpace2	Putamen	1244	Fundus of striatum	0.821867319592087
LatentSpace2	Putamen	1244	Olfactory tubercle	0.741629154340956
LatentSpace2	Putamen	1250	Caudoputamen	0.9833077289065495
LatentSpace2	Putamen	1250	Nucleus accumbens	0.8331501761505317
LatentSpace2	Putamen	1250	Fundus of striatum	0.8432626962865876
LatentSpace2	Putamen	1250	Olfactory tubercle	0.7676355914014193
LatentSpace2	Putamen	1255	Caudoputamen	0.9781156491425778
LatentSpace2	Putamen	1255	Nucleus accumbens	0.8519312385697467
LatentSpace2	Putamen	1255	Fundus of striatum	0.8615534887887134
LatentSpace2	Putamen	1255	Olfactory tubercle	0.7889614167506985
LatentSpace2	Putamen	1259	Caudoputamen	0.979761978749916
LatentSpace2	Putamen	1259	Nucleus accumbens	0.8181122170178753
LatentSpace2	Putamen	1259	Fundus of striatum	0.8205805409455643
LatentSpace2	Putamen	1259	Olfactory tubercle	0.7489285623326635
LatentSpace2	Putamen	1307	Caudoputamen	0.9724467097659227
LatentSpace2	Putamen	1307	Nucleus accumbens	0.8207688337177901
LatentSpace2	Putamen	1307	Fundus of striatum	0.8333668312040345
LatentSpace2	Putamen	1307	Olfactory tubercle	0.7579066927544735
LatentSpace2	Putamen	1326	Caudoputamen	0.9590127951036216
LatentSpace2	Putamen	1326	Nucleus accumbens	0.8224082328450268
LatentSpace2	Putamen	1326	Fundus of striatum	0.8353450495368786
LatentSpace2	Putamen	1326	Olfactory tubercle	0.7608402417323609
LatentSpace2	Putamen	1517	Caudoputamen	0.9870169458986225
LatentSpace2	Putamen	1517	Nucleus accumbens	0.8694661677234892
LatentSpace2	Putamen	1517	Fundus of striatum	0.8796361213390657
LatentSpace2	Putamen	1517	Olfactory tubercle	0.8087619847757589
LatentSpace2	Putamen	1539	Caudoputamen	0.984087361549375
LatentSpace2	Putamen	1539	Nucleus accumbens	0.8560138084051572
LatentSpace2	Putamen	1539	Fundus of striatum	0.8730148687558893
LatentSpace2	Putamen	1539	Olfactory tubercle	0.7947602568184805
LatentSpace2	Putamen	1773	Caudoputamen	0.9815858142110867
LatentSpace2	Putamen	1773	Nucleus accumbens	0.8069953764035862
LatentSpace2	Putamen	1773	Fundus of striatum	0.8250953280822673
LatentSpace2	Putamen	1773	Olfactory tubercle	0.7415720371372754
LatentSpace2	Putamen	1849	Caudoputamen	0.9711345192176136
LatentSpace2	Putamen	1849	Nucleus accumbens	0.9152524860756214
LatentSpace2	Putamen	1849	Fundus of striatum	0.9129287395624358
LatentSpace2	Putamen	1849	Olfactory tubercle	0.8597400346944819
LatentSpace2	Putamen	1957	Caudoputamen	0.9588522137341802
LatentSpace2	Putamen	1957	Nucleus accumbens	0.8788820264658375
LatentSpace2	Putamen	1957	Fundus of striatum	0.9014968089661305
LatentSpace2	Putamen	1957	Olfactory tubercle	0.8269966247160963
LatentSpace2	Putamen	2028	Caudoputamen	0.9517309123468048
LatentSpace2	Putamen	2028	Nucleus accumbens	0.8722124222752479
LatentSpace2	Putamen	2028	Fundus of striatum	0.8876724857093617
LatentSpace2	Putamen	2028	Olfactory tubercle	0.8210579628015061
LatentSpace2	Putamen	2160	Caudoputamen	0.9546351040084304
LatentSpace2	Putamen	2160	Nucleus accumbens	0.7980757769306278
LatentSpace2	Putamen	2160	Fundus of striatum	0.813040595182584
LatentSpace2	Putamen	2160	Olfactory tubercle	0.7331481042899776
LatentSpace2	Putamen	2164	Caudoputamen	0.9662242588627975
LatentSpace2	Putamen	2164	Nucleus accumbens	0.8395746278950699
LatentSpace2	Putamen	2164	Fundus of striatum	0.8497539425793139
LatentSpace2	Putamen	2164	Olfactory tubercle	0.7783742119031205
LatentSpace2	Putamen	2255	Caudoputamen	0.84676443537058
LatentSpace2	Putamen	2255	Nucleus accumbens	0.7901507137327789
LatentSpace2	Putamen	2255	Fundus of striatum	0.792617279700015
LatentSpace2	Putamen	2255	Olfactory tubercle	0.7454463184581989
LatentSpace2	Putamen	2267	Caudoputamen	0.9345760906478413
LatentSpace2	Putamen	2267	Nucleus accumbens	0.8380905635307928
LatentSpace2	Putamen	2267	Fundus of striatum	0.8453146403685716
LatentSpace2	Putamen	2267	Olfactory tubercle	0.7830232790037189
LatentSpace2	Putamen	2280	Caudoputamen	0.8283589860804483
LatentSpace2	Putamen	2280	Nucleus accumbens	0.7739779539216771
LatentSpace2	Putamen	2280	Fundus of striatum	0.7754084853993365
LatentSpace2	Putamen	2280	Olfactory tubercle	0.7298709808264512
LatentSpace2	Putamen	2343	Caudoputamen	0.9596598861131286
LatentSpace2	Putamen	2343	Nucleus accumbens	0.8040997520710077
LatentSpace2	Putamen	2343	Fundus of striatum	0.8170405124465041
LatentSpace2	Putamen	2343	Olfactory tubercle	0.741501910882379
LatentSpace2	Putamen	2346	Caudoputamen	0.978380807924031
LatentSpace2	Putamen	2346	Nucleus accumbens	0.8721037412471943
LatentSpace2	Putamen	2346	Fundus of striatum	0.8769468548805918
LatentSpace2	Putamen	2346	Olfactory tubercle	0.8105105404572883
LatentSpace2	Putamen	2364	Caudoputamen	0.9283498519012278
LatentSpace2	Putamen	2364	Nucleus accumbens	0.925998555025921
LatentSpace2	Putamen	2364	Fundus of striatum	0.914338958390615
LatentSpace2	Putamen	2364	Olfactory tubercle	0.8851209181340515
LatentSpace2	Putamen	2386	Caudoputamen	0.9392189187185764
LatentSpace2	Putamen	2386	Nucleus accumbens	0.9287179379805593
LatentSpace2	Putamen	2386	Fundus of striatum	0.9248702885422782
LatentSpace2	Putamen	2386	Olfactory tubercle	0.8811479261761533
LatentSpace2	Putamen	2554	Caudoputamen	0.9526899691922095
LatentSpace2	Putamen	2554	Nucleus accumbens	0.8169660784926767
LatentSpace2	Putamen	2554	Fundus of striatum	0.8290042586056231
LatentSpace2	Putamen	2554	Olfactory tubercle	0.758064874470941
LatentSpace2	Putamen	2578	Caudoputamen	0.9702194008324935
LatentSpace2	Putamen	2578	Nucleus accumbens	0.828333468683795
LatentSpace2	Putamen	2578	Fundus of striatum	0.8325611110065703
LatentSpace2	Putamen	2578	Olfactory tubercle	0.764188945576116
LatentSpace2	Putamen	2625	Caudoputamen	0.9070378976806058
LatentSpace2	Putamen	2625	Nucleus accumbens	0.7770312477145521
LatentSpace2	Putamen	2625	Fundus of striatum	0.789490555949961
LatentSpace2	Putamen	2625	Olfactory tubercle	0.7200646010368866
LatentSpace2	Putamen	2717	Caudoputamen	0.9379713961328545
LatentSpace2	Putamen	2717	Nucleus accumbens	0.9015759716835231
LatentSpace2	Putamen	2717	Fundus of striatum	0.9099886655768518
LatentSpace2	Putamen	2717	Olfactory tubercle	0.8535619859340768
LatentSpace2	Putamen	2775	Caudoputamen	0.9866655335094978
LatentSpace2	Putamen	2775	Nucleus accumbens	0.837444344381513
LatentSpace2	Putamen	2775	Fundus of striatum	0.840879076405793
LatentSpace2	Putamen	2775	Olfactory tubercle	0.7752735075654427
LatentSpace2	Putamen	2849	Caudoputamen	0.9816796136684203
LatentSpace2	Putamen	2849	Nucleus accumbens	0.8144165843074056
LatentSpace2	Putamen	2849	Fundus of striatum	0.8242730435885909
LatentSpace2	Putamen	2849	Olfactory tubercle	0.7490261786111024
LatentSpace2	Putamen	2869	Caudoputamen	0.9850075267148869
LatentSpace2	Putamen	2869	Nucleus accumbens	0.8746751680099052
LatentSpace2	Putamen	2869	Fundus of striatum	0.8670973914695389
LatentSpace2	Putamen	2869	Olfactory tubercle	0.812070075737372
LatentSpace2	Putamen	2875	Caudoputamen	0.9672271535533846
LatentSpace2	Putamen	2875	Nucleus accumbens	0.8609437816260392
LatentSpace2	Putamen	2875	Fundus of striatum	0.87425641865900106
LatentSpace2	Putamen	2875	Olfactory tubercle	0.804142053274813
LatentSpace2	Putamen	2878	Caudoputamen	0.9816057668989046
LatentSpace2	Putamen	2878	Nucleus accumbens	0.823833768580639
LatentSpace2	Putamen	2878	Fundus of striatum	0.8322520535028547
LatentSpace2	Putamen	2878	Olfactory tubercle	0.7604706234304996
LatentSpace2	Putamen	2984	Caudoputamen	0.9820370689177188
LatentSpace2	Putamen	2984	Nucleus accumbens	0.8922762682400153
LatentSpace2	Putamen	2984	Fundus of striatum	0.898554295334952
LatentSpace2	Putamen	2984	Olfactory tubercle	0.836414810524154
LatentSpace2	Putamen	3064	Caudoputamen	0.9661852715534481
LatentSpace2	Putamen	3064	Nucleus accumbens	0.8497411229243479
LatentSpace2	Putamen	3064	Fundus of striatum	0.8617737675824817
LatentSpace2	Putamen	3064	Olfactory tubercle	0.7898295732320406
LatentSpace2	Putamen	3286	Caudoputamen	0.9834899786375796
LatentSpace2	Putamen	3286	Nucleus accumbens	0.8359044511018473
LatentSpace2	Putamen	3286	Fundus of striatum	0.8511185714911138
LatentSpace2	Putamen	3286	Olfactory tubercle	0.773921697451446
LatentSpace2	Putamen	3298	Caudoputamen	0.9844569735600812
LatentSpace2	Putamen	3298	Nucleus accumbens	0.8494502909467382
LatentSpace2	Putamen	3298	Fundus of striatum	0.8652519512525234
LatentSpace2	Putamen	3298	Olfactory tubercle	0.7877139752608491
LatentSpace2	Putamen	3301	Caudoputamen	0.979701393819142
LatentSpace2	Putamen	3301	Nucleus accumbens	0.8849001977526173
LatentSpace2	Putamen	3301	Fundus of striatum	0.8807435644815961
LatentSpace2	Putamen	3301	Olfactory tubercle	0.8249517817233722
LatentSpace2	Putamen	3620	Caudoputamen	0.9855920336923418
LatentSpace2	Putamen	3620	Nucleus accumbens	0.8739729142815512
LatentSpace2	Putamen	3620	Fundus of striatum	0.8694139238807909
LatentSpace2	Putamen	3620	Olfactory tubercle	0.8140493109577294
LatentSpace2	Putamen	3656	Caudoputamen	0.9738634397182059
LatentSpace2	Putamen	3656	Nucleus accumbens	0.873427052605986
LatentSpace2	Putamen	3656	Fundus of striatum	0.88797354572456
LatentSpace2	Putamen	3656	Olfactory tubercle	0.815933666767831
LatentSpace2	Nucleus accumbens	877	Caudoputamen	0.9287994661132704
LatentSpace2	Nucleus accumbens	877	Nucleus accumbens	0.9626798888261434
LatentSpace2	Nucleus accumbens	877	Fundus of striatum	0.9266442875149316
LatentSpace2	Nucleus accumbens	877	Olfactory tubercle	0.9172079158752044
LatentSpace2	Nucleus accumbens	921	Caudoputamen	0.9359089310649941
LatentSpace2	Nucleus accumbens	921	Nucleus accumbens	0.9561755810392574
LatentSpace2	Nucleus accumbens	921	Fundus of striatum	0.930827263647701
LatentSpace2	Nucleus accumbens	921	Olfactory tubercle	0.9076574584391535
LatentSpace2	Nucleus accumbens	944	Caudoputamen	0.9626376000884572
LatentSpace2	Nucleus accumbens	944	Nucleus accumbens	0.9031079268300986
LatentSpace2	Nucleus accumbens	944	Fundus of striatum	0.9094005307980462
LatentSpace2	Nucleus accumbens	944	Olfactory tubercle	0.8494914133492765
LatentSpace2	Nucleus accumbens	945	Caudoputamen	0.9273652090308405
LatentSpace2	Nucleus accumbens	945	Nucleus accumbens	0.9266753172553456
LatentSpace2	Nucleus accumbens	945	Fundus of striatum	0.9553608399788178
LatentSpace2	Nucleus accumbens	945	Olfactory tubercle	0.883222650812788
LatentSpace2	Nucleus accumbens	946	Caudoputamen	0.9395231525398406
LatentSpace2	Nucleus accumbens	946	Nucleus accumbens	0.9531256877095742
LatentSpace2	Nucleus accumbens	946	Fundus of striatum	0.9547713268979114
LatentSpace2	Nucleus accumbens	946	Olfactory tubercle	0.9051797124767735
LatentSpace2	Nucleus accumbens	968	Caudoputamen	0.9592950721474541
LatentSpace2	Nucleus accumbens	968	Nucleus accumbens	0.9192046134553874
LatentSpace2	Nucleus accumbens	968	Fundus of striatum	0.9247652913419946
LatentSpace2	Nucleus accumbens	968	Olfactory tubercle	0.8630420137474726
LatentSpace2	Nucleus accumbens	971	Caudoputamen	0.9728266358402837
LatentSpace2	Nucleus accumbens	971	Nucleus accumbens	0.8977813393724998
LatentSpace2	Nucleus accumbens	971	Fundus of striatum	0.919485775245342
LatentSpace2	Nucleus accumbens	971	Olfactory tubercle	0.838917869416293
LatentSpace2	Nucleus accumbens	1256	Caudoputamen	0.9192242189779365
LatentSpace2	Nucleus accumbens	1256	Nucleus accumbens	0.952679172301502
LatentSpace2	Nucleus accumbens	1256	Fundus of striatum	0.9263783585177623
LatentSpace2	Nucleus accumbens	1256	Olfactory tubercle	0.9109072628005415
LatentSpace2	Nucleus accumbens	1715	Caudoputamen	0.4229427241131093
LatentSpace2	Nucleus accumbens	1715	Nucleus accumbens	0.4566355292590907
LatentSpace2	Nucleus accumbens	1715	Fundus of striatum	0.4234511081332907
LatentSpace2	Nucleus accumbens	1715	Olfactory tubercle	0.45067770360548076
LatentSpace2	Nucleus accumbens	1848	Caudoputamen	0.9275433783040007
LatentSpace2	Nucleus accumbens	1848	Nucleus accumbens	0.9599381828782101
LatentSpace2	Nucleus accumbens	1848	Fundus of striatum	0.9432149591331104
LatentSpace2	Nucleus accumbens	1848	Olfactory tubercle	0.9148501401042294
LatentSpace2	Nucleus accumbens	2008	Caudoputamen	0.8870943297525979
LatentSpace2	Nucleus accumbens	2008	Nucleus accumbens	0.9618134068117508
LatentSpace2	Nucleus accumbens	2008	Fundus of striatum	0.9340929864270585
LatentSpace2	Nucleus accumbens	2008	Olfactory tubercle	0.9237924791432713
LatentSpace2	Nucleus accumbens	2378	Caudoputamen	0.8556383687708594
LatentSpace2	Nucleus accumbens	2378	Nucleus accumbens	0.953126718996392
LatentSpace2	Nucleus accumbens	2378	Fundus of striatum	0.9310511258237072
LatentSpace2	Nucleus accumbens	2378	Olfactory tubercle	0.9216056403476964
LatentSpace2	Nucleus accumbens	2421	Caudoputamen	0.9027142563079086
LatentSpace2	Nucleus accumbens	2421	Nucleus accumbens	0.9560734121033324
LatentSpace2	Nucleus accumbens	2421	Fundus of striatum	0.9493957184641767
LatentSpace2	Nucleus accumbens	2421	Olfactory tubercle	0.9157990364132704
LatentSpace2	Nucleus accumbens	2778	Caudoputamen	0.9139782732871211
LatentSpace2	Nucleus accumbens	2778	Nucleus accumbens	0.9632035990872534
LatentSpace2	Nucleus accumbens	2778	Fundus of striatum	0.9371594791499706
LatentSpace2	Nucleus accumbens	2778	Olfactory tubercle	0.922195145602782
LatentSpace2	Nucleus accumbens	3042	Caudoputamen	0.9156458564086942
LatentSpace2	Nucleus accumbens	3042	Nucleus accumbens	0.969410636311905
LatentSpace2	Nucleus accumbens	3042	Fundus of striatum	0.9579557412057083
LatentSpace2	Nucleus accumbens	3042	Olfactory tubercle	0.9307453148733363
LatentSpace2	Nucleus accumbens	3300	Caudoputamen	0.9428768198615121
LatentSpace2	Nucleus accumbens	3300	Nucleus accumbens	0.9500248520359713
LatentSpace2	Nucleus accumbens	3300	Fundus of striatum	0.9281172758106221
LatentSpace2	Nucleus accumbens	3300	Olfactory tubercle	0.9021049879855613
LatentSpace2	Nucleus accumbens	3632	Caudoputamen	0.8678791827788279
LatentSpace2	Nucleus accumbens	3632	Nucleus accumbens	0.9448956172818657
LatentSpace2	Nucleus accumbens	3632	Fundus of striatum	0.9209460962343489
LatentSpace2	Nucleus accumbens	3632	Olfactory tubercle	0.9109946372147307
LatentSpace3	Caudate	12	Caudoputamen	0.9780324383193583
LatentSpace3	Caudate	12	Nucleus accumbens	0.86215394314812
LatentSpace3	Caudate	12	Fundus of striatum	0.8642205905852515
LatentSpace3	Caudate	12	Olfactory tubercle	0.8041833242266093
LatentSpace3	Caudate	136	Caudoputamen	0.9710607341095095
LatentSpace3	Caudate	136	Nucleus accumbens	0.8072794446320937
LatentSpace3	Caudate	136	Fundus of striatum	0.8001340682323088
LatentSpace3	Caudate	136	Olfactory tubercle	0.738754893857438
LatentSpace3	Caudate	164	Caudoputamen	0.9680318446752898
LatentSpace3	Caudate	164	Nucleus accumbens	0.8421180746867921
LatentSpace3	Caudate	164	Fundus of striatum	0.8312756609414487
LatentSpace3	Caudate	164	Olfactory tubercle	0.7777342948499368
LatentSpace3	Caudate	173	Caudoputamen	0.9521984723540161
LatentSpace3	Caudate	173	Nucleus accumbens	0.830353426953532
LatentSpace3	Caudate	173	Fundus of striatum	0.817845996170494
LatentSpace3	Caudate	173	Olfactory tubercle	0.7668218594206828
LatentSpace3	Caudate	218	Caudoputamen	0.9806096196836425
LatentSpace3	Caudate	218	Nucleus accumbens	0.8436927461105387
LatentSpace3	Caudate	218	Fundus of striatum	0.8309388933711048
LatentSpace3	Caudate	218	Olfactory tubercle	0.7745172716877676
LatentSpace3	Caudate	315	Caudoputamen	0.3805153229701315
LatentSpace3	Caudate	315	Nucleus accumbens	0.36670770016362814
LatentSpace3	Caudate	315	Fundus of striatum	0.42467066704346484
LatentSpace3	Caudate	315	Olfactory tubercle	0.37330944907098845
LatentSpace3	Caudate	422	Caudoputamen	0.9802216442998988
LatentSpace3	Caudate	422	Nucleus accumbens	0.8403790556582543
LatentSpace3	Caudate	422	Fundus of striatum	0.8473436082573957
LatentSpace3	Caudate	422	Olfactory tubercle	0.7748228477947702
LatentSpace3	Caudate	452	Caudoputamen	0.9725339819202199
LatentSpace3	Caudate	452	Nucleus accumbens	0.8208632108269731
LatentSpace3	Caudate	452	Fundus of striatum	0.815011549096347
LatentSpace3	Caudate	452	Olfactory tubercle	0.7543870012248182
LatentSpace3	Caudate	483	Caudoputamen	0.97172528429307
LatentSpace3	Caudate	483	Nucleus accumbens	0.8141094773627162
LatentSpace3	Caudate	483	Fundus of striatum	0.8014253446726203
LatentSpace3	Caudate	483	Olfactory tubercle	0.7397553653248955
LatentSpace3	Caudate	487	Caudoputamen	0.9690228342633748
LatentSpace3	Caudate	487	Nucleus accumbens	0.8239287653797903
LatentSpace3	Caudate	487	Fundus of striatum	0.8122606455320904
LatentSpace3	Caudate	487	Olfactory tubercle	0.7527604206279835
LatentSpace3	Caudate	490	Caudoputamen	0.9599149477379715
LatentSpace3	Caudate	490	Nucleus accumbens	0.7836603102662982
LatentSpace3	Caudate	490	Fundus of striatum	0.7776218969512101
LatentSpace3	Caudate	490	Olfactory tubercle	0.7146568357186402
LatentSpace3	Caudate	512	Caudoputamen	0.9695028203335572
LatentSpace3	Caudate	512	Nucleus accumbens	0.8735111689870008
LatentSpace3	Caudate	512	Fundus of striatum	0.8643586450267049
LatentSpace3	Caudate	512	Olfactory tubercle	0.8093610390611988
LatentSpace3	Caudate	557	Caudoputamen	0.9759397965589568
LatentSpace3	Caudate	557	Nucleus accumbens	0.8333704379636704
LatentSpace3	Caudate	557	Fundus of striatum	0.8207790353437358
LatentSpace3	Caudate	557	Olfactory tubercle	0.7602960191242193
LatentSpace3	Caudate	647	Caudoputamen	0.9809656408702183
LatentSpace3	Caudate	647	Nucleus accumbens	0.8605581827868201
LatentSpace3	Caudate	647	Fundus of striatum	0.8483058151301389
LatentSpace3	Caudate	647	Olfactory tubercle	0.7926736146538187
LatentSpace3	Caudate	656	Caudoputamen	0.974870426904216
LatentSpace3	Caudate	656	Nucleus accumbens	0.8964764057205914
LatentSpace3	Caudate	656	Fundus of striatum	0.8851144653374459
LatentSpace3	Caudate	656	Olfactory tubercle	0.8338392505943717
LatentSpace3	Caudate	657	Caudoputamen	0.9780086051271142
LatentSpace3	Caudate	657	Nucleus accumbens	0.8408640044898681
LatentSpace3	Caudate	657	Fundus of striatum	0.8275079474361708
LatentSpace3	Caudate	657	Olfactory tubercle	0.7757448819029737
LatentSpace3	Caudate	786	Caudoputamen	0.9675773518870091
LatentSpace3	Caudate	786	Nucleus accumbens	0.8908903932466369
LatentSpace3	Caudate	786	Fundus of striatum	0.8869320385652951
LatentSpace3	Caudate	786	Olfactory tubercle	0.8417997476699793
LatentSpace3	Caudate	796	Caudoputamen	0.9727083674095679
LatentSpace3	Caudate	796	Nucleus accumbens	0.8657861404395378
LatentSpace3	Caudate	796	Fundus of striatum	0.8535800900650745
LatentSpace3	Caudate	796	Olfactory tubercle	0.8023779351187891
LatentSpace3	Caudate	885	Caudoputamen	0.9716773997846949
LatentSpace3	Caudate	885	Nucleus accumbens	0.8490152436658683
LatentSpace3	Caudate	885	Fundus of striatum	0.830922353888188
LatentSpace3	Caudate	885	Olfactory tubercle	0.7826333636615401
LatentSpace3	Caudate	887	Caudoputamen	0.9774973063189153
LatentSpace3	Caudate	887	Nucleus accumbens	0.8415291695520599
LatentSpace3	Caudate	887	Fundus of striatum	0.8305622717131704
LatentSpace3	Caudate	887	Olfactory tubercle	0.7698549111048383
LatentSpace3	Caudate	916	Caudoputamen	0.9676752229627427
LatentSpace3	Caudate	916	Nucleus accumbens	0.8301326582878661
LatentSpace3	Caudate	916	Fundus of striatum	0.8160204204317324
LatentSpace3	Caudate	916	Olfactory tubercle	0.7687012483149963
LatentSpace3	Caudate	917	Caudoputamen	0.9209715110676455
LatentSpace3	Caudate	917	Nucleus accumbens	0.8094041438266002
LatentSpace3	Caudate	917	Fundus of striatum	0.8074614399286045
LatentSpace3	Caudate	917	Olfactory tubercle	0.7634988520073133
LatentSpace3	Caudate	918	Caudoputamen	0.91916447525827
LatentSpace3	Caudate	918	Nucleus accumbens	0.8274487665568466
LatentSpace3	Caudate	918	Fundus of striatum	0.8182805042287775
LatentSpace3	Caudate	918	Olfactory tubercle	0.7785722887575556
LatentSpace3	Caudate	924	Caudoputamen	0.9537261057349607
LatentSpace3	Caudate	924	Nucleus accumbens	0.8035875849799081
LatentSpace3	Caudate	924	Fundus of striatum	0.7911747340143302
LatentSpace3	Caudate	924	Olfactory tubercle	0.7452602079661048
LatentSpace3	Caudate	929	Caudoputamen	0.9712185760968383
LatentSpace3	Caudate	929	Nucleus accumbens	0.8467480813504953
LatentSpace3	Caudate	929	Fundus of striatum	0.8303778002302222
LatentSpace3	Caudate	929	Olfactory tubercle	0.7830981759064846
LatentSpace3	Caudate	933	Caudoputamen	0.9493542673530901
LatentSpace3	Caudate	933	Nucleus accumbens	0.8079936903940376
LatentSpace3	Caudate	933	Fundus of striatum	0.8040130584285055
LatentSpace3	Caudate	933	Olfactory tubercle	0.7506740765774446
LatentSpace3	Caudate	967	Caudoputamen	0.9818652053371819
LatentSpace3	Caudate	967	Nucleus accumbens	0.8323238158544929
LatentSpace3	Caudate	967	Fundus of striatum	0.8405749880595653
LatentSpace3	Caudate	967	Olfactory tubercle	0.7692161937729997
LatentSpace3	Caudate	979	Caudoputamen	0.9606311479480372
LatentSpace3	Caudate	979	Nucleus accumbens	0.8228133535206897
LatentSpace3	Caudate	979	Fundus of striatum	0.8428399737747092
LatentSpace3	Caudate	979	Olfactory tubercle	0.778559213016661
LatentSpace3	Caudate	1022	Caudoputamen	0.9765736315291353
LatentSpace3	Caudate	1022	Nucleus accumbens	0.8226253058544976
LatentSpace3	Caudate	1022	Fundus of striatum	0.8089959058767037
LatentSpace3	Caudate	1022	Olfactory tubercle	0.7499347367162327
LatentSpace3	Caudate	1043	Caudoputamen	0.9774217035339471
LatentSpace3	Caudate	1043	Nucleus accumbens	0.8396580177403092
LatentSpace3	Caudate	1043	Fundus of striatum	0.8266122324811006
LatentSpace3	Caudate	1043	Olfactory tubercle	0.7661530972019748
LatentSpace3	Caudate	1239	Caudoputamen	0.9822552176693965
LatentSpace3	Caudate	1239	Nucleus accumbens	0.814414067592108
LatentSpace3	Caudate	1239	Fundus of striatum	0.8012732124227073
LatentSpace3	Caudate	1239	Olfactory tubercle	0.738445518423297
LatentSpace3	Caudate	1247	Caudoputamen	0.9828479263966198
LatentSpace3	Caudate	1247	Nucleus accumbens	0.8184232815257951
LatentSpace3	Caudate	1247	Fundus of striatum	0.8095472931310682
LatentSpace3	Caudate	1247	Olfactory tubercle	0.7480167429776285
LatentSpace3	Caudate	1248	Caudoputamen	0.9733877224484854
LatentSpace3	Caudate	1248	Nucleus accumbens	0.81815287132287
LatentSpace3	Caudate	1248	Fundus of striatum	0.8097490766595598
LatentSpace3	Caudate	1248	Olfactory tubercle	0.7508135548821642
LatentSpace3	Caudate	1249	Caudoputamen	0.9592559344931495
LatentSpace3	Caudate	1249	Nucleus accumbens	0.7589657663405878
LatentSpace3	Caudate	1249	Fundus of striatum	0.753904814311462
LatentSpace3	Caudate	1249	Olfactory tubercle	0.6929125615836066
LatentSpace3	Caudate	1254	Caudoputamen	0.9641600544859745
LatentSpace3	Caudate	1254	Nucleus accumbens	0.7888679777634683
LatentSpace3	Caudate	1254	Fundus of striatum	0.7875369978785556
LatentSpace3	Caudate	1254	Olfactory tubercle	0.7218341637744591
LatentSpace3	Caudate	1306	Caudoputamen	0.9704312100522541
LatentSpace3	Caudate	1306	Nucleus accumbens	0.7811760742631011
LatentSpace3	Caudate	1306	Fundus of striatum	0.7772895302978134
LatentSpace3	Caudate	1306	Olfactory tubercle	0.7083688841004171
LatentSpace3	Caudate	1458	Caudoputamen	0.9657229201760643
LatentSpace3	Caudate	1458	Nucleus accumbens	0.8276128722127986
LatentSpace3	Caudate	1458	Fundus of striatum	0.821394297557364
LatentSpace3	Caudate	1458	Olfactory tubercle	0.7625828927272005
LatentSpace3	Caudate	1473	Caudoputamen	0.34005711030139196
LatentSpace3	Caudate	1473	Nucleus accumbens	0.42743512956531804
LatentSpace3	Caudate	1473	Fundus of striatum	0.40639900959003195
LatentSpace3	Caudate	1473	Olfactory tubercle	0.39315443077789675
LatentSpace3	Caudate	1486	Caudoputamen	0.9787554032650373
LatentSpace3	Caudate	1486	Nucleus accumbens	0.8687787489630696
LatentSpace3	Caudate	1486	Fundus of striatum	0.8672350794762465
LatentSpace3	Caudate	1486	Olfactory tubercle	0.8097167661636538
LatentSpace3	Caudate	1503	Caudoputamen	0.9768502946305865
LatentSpace3	Caudate	1503	Nucleus accumbens	0.8436910283541513
LatentSpace3	Caudate	1503	Fundus of striatum	0.8296105030047755
LatentSpace3	Caudate	1503	Olfactory tubercle	0.7749533570408881
LatentSpace3	Caudate	1511	Caudoputamen	0.9826411436271401
LatentSpace3	Caudate	1511	Nucleus accumbens	0.8399764740606848
LatentSpace3	Caudate	1511	Fundus of striatum	0.8322338209791985
LatentSpace3	Caudate	1511	Olfactory tubercle	0.7686141465244931
LatentSpace3	Caudate	1674	Caudoputamen	0.9832262456906719
LatentSpace3	Caudate	1674	Nucleus accumbens	0.8303165601292445
LatentSpace3	Caudate	1674	Fundus of striatum	0.8232989452688693
LatentSpace3	Caudate	1674	Olfactory tubercle	0.7625985609487563
LatentSpace3	Caudate	1675	Caudoputamen	0.9860033980816418
LatentSpace3	Caudate	1675	Nucleus accumbens	0.8285197956498818
LatentSpace3	Caudate	1675	Fundus of striatum	0.8256557121701952
LatentSpace3	Caudate	1675	Olfactory tubercle	0.7607905213494586
LatentSpace3	Caudate	1700	Caudoputamen	0.9843590769598671
LatentSpace3	Caudate	1700	Nucleus accumbens	0.8235439796117213
LatentSpace3	Caudate	1700	Fundus of striatum	0.8088844768693966
LatentSpace3	Caudate	1700	Olfactory tubercle	0.7557925118898922
LatentSpace3	Caudate	1707	Caudoputamen	0.9861169538291047
LatentSpace3	Caudate	1707	Nucleus accumbens	0.8250182496558632
LatentSpace3	Caudate	1707	Fundus of striatum	0.81731519736243885
LatentSpace3	Caudate	1707	Olfactory tubercle	0.751379198563628
LatentSpace3	Caudate	1727	Caudoputamen	0.974401391387874
LatentSpace3	Caudate	1727	Nucleus accumbens	0.799523566064867
LatentSpace3	Caudate	1727	Fundus of striatum	0.7998031175503736
LatentSpace3	Caudate	1727	Olfactory tubercle	0.7461959136417304
LatentSpace3	Caudate	1737	Caudoputamen	0.9782785230002178
LatentSpace3	Caudate	1737	Nucleus accumbens	0.8189269660278166
LatentSpace3	Caudate	1737	Fundus of striatum	0.8170577500852975
LatentSpace3	Caudate	1737	Olfactory tubercle	0.7642547823975168
LatentSpace3	Caudate	1781	Caudoputamen	0.9795949712632886
LatentSpace3	Caudate	1781	Nucleus accumbens	0.8460897741633233
LatentSpace3	Caudate	1781	Fundus of striatum	0.8463941881739804
LatentSpace3	Caudate	1781	Olfactory tubercle	0.780822191276021
LatentSpace3	Caudate	1782	Caudoputamen	0.9811853717969141
LatentSpace3	Caudate	1782	Nucleus accumbens	0.8090425244818802
LatentSpace3	Caudate	1782	Fundus of striatum	0.8150573363940319
LatentSpace3	Caudate	1782	Olfactory tubercle	0.7415503481697503
LatentSpace3	Caudate	1790	Caudoputamen	0.981572444986961
LatentSpace3	Caudate	1790	Nucleus accumbens	0.8364348428319682
LatentSpace3	Caudate	1790	Fundus of striatum	0.8374150870840812
LatentSpace3	Caudate	1790	Olfactory tubercle	0.7745058221292391
LatentSpace3	Caudate	1831	Caudoputamen	0.38908773929006607
LatentSpace3	Caudate	1831	Nucleus accumbens	0.4089325580051827
LatentSpace3	Caudate	1831	Fundus of striatum	0.39476745852798
LatentSpace3	Caudate	1831	Olfactory tubercle	0.41221618422702483
LatentSpace3	Caudate	1846	Caudoputamen	0.9692205427779583
LatentSpace3	Caudate	1846	Nucleus accumbens	0.8537342324551574
LatentSpace3	Caudate	1846	Fundus of striatum	0.8505842070053025
LatentSpace3	Caudate	1846	Olfactory tubercle	0.7922805017293457
LatentSpace3	Caudate	1967	Caudoputamen	0.9904300525274082
LatentSpace3	Caudate	1967	Nucleus accumbens	0.8442580132363743
LatentSpace3	Caudate	1967	Fundus of striatum	0.8346571114583848
LatentSpace3	Caudate	1967	Olfactory tubercle	0.7707717578263443
LatentSpace3	Caudate	1986	Caudoputamen	0.9823222819108606
LatentSpace3	Caudate	1986	Nucleus accumbens	0.8447660748229168
LatentSpace3	Caudate	1986	Fundus of striatum	0.8477910272144378
LatentSpace3	Caudate	1986	Olfactory tubercle	0.7788489697230078
LatentSpace3	Caudate	2030	Caudoputamen	0.9818245304339813
LatentSpace3	Caudate	2030	Nucleus accumbens	0.8440752221085972
LatentSpace3	Caudate	2030	Fundus of striatum	0.8456748862193958
LatentSpace3	Caudate	2030	Olfactory tubercle	0.7807460551920443
LatentSpace3	Caudate	2031	Caudoputamen	0.9858405733006308
LatentSpace3	Caudate	2031	Nucleus accumbens	0.8467383240240828
LatentSpace3	Caudate	2031	Fundus of striatum	0.844427662873842
LatentSpace3	Caudate	2031	Olfactory tubercle	0.7810633475632573
LatentSpace3	Caudate	2053	Caudoputamen	0.9834688482025769
LatentSpace3	Caudate	2053	Nucleus accumbens	0.8461683982773136
LatentSpace3	Caudate	2053	Fundus of striatum	0.8401978192749106
LatentSpace3	Caudate	2053	Olfactory tubercle	0.7761128072461284
LatentSpace3	Caudate	2111	Caudoputamen	0.9789012599876458
LatentSpace3	Caudate	2111	Nucleus accumbens	0.8296257841487665
LatentSpace3	Caudate	2111	Fundus of striatum	0.8236408828747085
LatentSpace3	Caudate	2111	Olfactory tubercle	0.7553039610068687
LatentSpace3	Caudate	2161	Caudoputamen	0.9702152872635786
LatentSpace3	Caudate	2161	Nucleus accumbens	0.762981042814155
LatentSpace3	Caudate	2161	Fundus of striatum	0.7580458327844165
LatentSpace3	Caudate	2161	Olfactory tubercle	0.6933236934245508
LatentSpace3	Caudate	2165	Caudoputamen	0.977914547900245
LatentSpace3	Caudate	2165	Nucleus accumbens	0.8191322474588094
LatentSpace3	Caudate	2165	Fundus of striatum	0.8145408623924197
LatentSpace3	Caudate	2165	Olfactory tubercle	0.7535386985528817
LatentSpace3	Caudate	2203	Caudoputamen	0.9598970226253845
LatentSpace3	Caudate	2203	Nucleus accumbens	0.8243676341388709
LatentSpace3	Caudate	2203	Fundus of striatum	0.8153230828698902
LatentSpace3	Caudate	2203	Olfactory tubercle	0.7531006666763301
LatentSpace3	Caudate	2256	Caudoputamen	0.9782572975228747
LatentSpace3	Caudate	2256	Nucleus accumbens	0.8462760523120778
LatentSpace3	Caudate	2256	Fundus of striatum	0.8414158954499769
LatentSpace3	Caudate	2256	Olfactory tubercle	0.7880490901662929
LatentSpace3	Caudate	2285	Caudoputamen	0.8691927281620093
LatentSpace3	Caudate	2285	Nucleus accumbens	0.827393735415235
LatentSpace3	Caudate	2285	Fundus of striatum	0.8244826165504989
LatentSpace3	Caudate	2285	Olfactory tubercle	0.7791047702636855
LatentSpace3	Caudate	2344	Caudoputamen	0.979277020101136
LatentSpace3	Caudate	2344	Nucleus accumbens	0.8316147134058356
LatentSpace3	Caudate	2344	Fundus of striatum	0.8249197749639927
LatentSpace3	Caudate	2344	Olfactory tubercle	0.762696870449398
LatentSpace3	Caudate	2349	Caudoputamen	0.9765364734715967
LatentSpace3	Caudate	2349	Nucleus accumbens	0.8213047967155442
LatentSpace3	Caudate	2349	Fundus of striatum	0.8215455861853165
LatentSpace3	Caudate	2349	Olfactory tubercle	0.7543000379927011
LatentSpace3	Caudate	2365	Caudoputamen	0.9663777126938423
LatentSpace3	Caudate	2365	Nucleus accumbens	0.9031858067613127
LatentSpace3	Caudate	2365	Fundus of striatum	0.8938789125024853
LatentSpace3	Caudate	2365	Olfactory tubercle	0.8460763658726074
LatentSpace3	Caudate	2387	Caudoputamen	0.9395403043200089
LatentSpace3	Caudate	2387	Nucleus accumbens	0.9333986611166503
LatentSpace3	Caudate	2387	Fundus of striatum	0.9388166155796461
LatentSpace3	Caudate	2387	Olfactory tubercle	0.888701697002731
LatentSpace3	Caudate	2626	Caudoputamen	0.9737645094460033
LatentSpace3	Caudate	2626	Nucleus accumbens	0.8008196881827483
LatentSpace3	Caudate	2626	Fundus of striatum	0.7956543974575327
LatentSpace3	Caudate	2626	Olfactory tubercle	0.7309139705599478
LatentSpace3	Caudate	2694	Caudoputamen	0.9756458134346695
LatentSpace3	Caudate	2694	Nucleus accumbens	0.83364518386652
LatentSpace3	Caudate	2694	Fundus of striatum	0.826296819249524
LatentSpace3	Caudate	2694	Olfactory tubercle	0.7668899417923425
LatentSpace3	Caudate	2710	Caudoputamen	0.9703853167624891
LatentSpace3	Caudate	2710	Nucleus accumbens	0.8297668976837291
LatentSpace3	Caudate	2710	Fundus of striatum	0.8207869710483545
LatentSpace3	Caudate	2710	Olfactory tubercle	0.7678920255392632
LatentSpace3	Caudate	2711	Caudoputamen	0.9760063021574666
LatentSpace3	Caudate	2711	Nucleus accumbens	0.8659202650087269
LatentSpace3	Caudate	2711	Fundus of striatum	0.8576140818005896
LatentSpace3	Caudate	2711	Olfactory tubercle	0.8106389970517264
LatentSpace3	Caudate	2777	Caudoputamen	0.9797266709759525
LatentSpace3	Caudate	2777	Nucleus accumbens	0.8363995614693055
LatentSpace3	Caudate	2777	Fundus of striatum	0.8312211387467326
LatentSpace3	Caudate	2777	Olfactory tubercle	0.7682797989548583
LatentSpace3	Caudate	2779	Caudoputamen	0.9772814758787064
LatentSpace3	Caudate	2779	Nucleus accumbens	0.8167151057912653
LatentSpace3	Caudate	2779	Fundus of striatum	0.8144739686405928
LatentSpace3	Caudate	2779	Olfactory tubercle	0.7484701543845894
LatentSpace3	Caudate	2811	Caudoputamen	0.9787653723106821
LatentSpace3	Caudate	2811	Nucleus accumbens	0.8351707373093621
LatentSpace3	Caudate	2811	Fundus of striatum	0.8385948202623159
LatentSpace3	Caudate	2811	Olfactory tubercle	0.7730895071625378
LatentSpace3	Caudate	2812	Caudoputamen	0.9795359787386494
LatentSpace3	Caudate	2812	Nucleus accumbens	0.8573567519666841
LatentSpace3	Caudate	2812	Fundus of striatum	0.8556954802412295
LatentSpace3	Caudate	2812	Olfactory tubercle	0.7996030724928774
LatentSpace3	Caudate	2844	Caudoputamen	0.9612822658287572
LatentSpace3	Caudate	2844	Nucleus accumbens	0.8302124614873905
LatentSpace3	Caudate	2844	Fundus of striatum	0.8328837312590486
LatentSpace3	Caudate	2844	Olfactory tubercle	0.7783760827907406
LatentSpace3	Caudate	2981	Caudoputamen	0.9732886627670888
LatentSpace3	Caudate	2981	Nucleus accumbens	0.8397320992834673
LatentSpace3	Caudate	2981	Fundus of striatum	0.8534360946603402
LatentSpace3	Caudate	2981	Olfactory tubercle	0.7800919409766572
LatentSpace3	Caudate	3019	Caudoputamen	0.9775572746700257
LatentSpace3	Caudate	3019	Nucleus accumbens	0.8519750507171376
LatentSpace3	Caudate	3019	Fundus of striatum	0.8534647057397298
LatentSpace3	Caudate	3019	Olfactory tubercle	0.7918446435898495
LatentSpace3	Caudate	3061	Caudoputamen	0.9752768152223341
LatentSpace3	Caudate	3061	Nucleus accumbens	0.8749586594892904
LatentSpace3	Caudate	3061	Fundus of striatum	0.8773738694346912
LatentSpace3	Caudate	3061	Olfactory tubercle	0.8194663096855117
LatentSpace3	Caudate	3081	Caudoputamen	0.9737374525322755
LatentSpace3	Caudate	3081	Nucleus accumbens	0.89364822073333
LatentSpace3	Caudate	3081	Fundus of striatum	0.8939098553527879
LatentSpace3	Caudate	3081	Olfactory tubercle	0.8370569153446992
LatentSpace3	Caudate	3279	Caudoputamen	0.9726732474564321
LatentSpace3	Caudate	3279	Nucleus accumbens	0.8652176624526442
LatentSpace3	Caudate	3279	Fundus of striatum	0.8559173232999572
LatentSpace3	Caudate	3279	Olfactory tubercle	0.8018465855981072
LatentSpace3	Caudate	3287	Caudoputamen	0.9807646901900386
LatentSpace3	Caudate	3287	Nucleus accumbens	0.8380448129459024
LatentSpace3	Caudate	3287	Fundus of striatum	0.8265045558009679
LatentSpace3	Caudate	3287	Olfactory tubercle	0.7685205534771694
LatentSpace3	Caudate	3299	Caudoputamen	0.9769526864624004
LatentSpace3	Caudate	3299	Nucleus accumbens	0.8350043964313739
LatentSpace3	Caudate	3299	Fundus of striatum	0.8213924210805535
LatentSpace3	Caudate	3299	Olfactory tubercle	0.764829354758473
LatentSpace3	Caudate	3302	Caudoputamen	0.9718622096560989
LatentSpace3	Caudate	3302	Nucleus accumbens	0.85657854969298175
LatentSpace3	Caudate	3302	Fundus of striatum	0.8532049456165064
LatentSpace3	Caudate	3302	Olfactory tubercle	0.7908289760189963
LatentSpace3	Caudate	3426	Caudoputamen	0.9803201664128088
LatentSpace3	Caudate	3426	Nucleus accumbens	0.7998832960517165
LatentSpace3	Caudate	3426	Fundus of striatum	0.7978741615753231
LatentSpace3	Caudate	3426	Olfactory tubercle	0.723479609810131
LatentSpace3	Caudate	3512	Caudoputamen	0.982465538821428
LatentSpace3	Caudate	3512	Nucleus accumbens	0.8470047197367251
LatentSpace3	Caudate	3512	Fundus of striatum	0.8427324890714994
LatentSpace3	Caudate	3512	Olfactory tubercle	0.7777790667665173
LatentSpace3	Caudate	3513	Caudoputamen	0.9830693072440325
LatentSpace3	Caudate	3513	Nucleus accumbens	0.84928683782987
LatentSpace3	Caudate	3513	Fundus of striatum	0.844955010796387
LatentSpace3	Caudate	3513	Olfactory tubercle	0.7772424724295679
LatentSpace3	Caudate	3621	Caudoputamen	0.9751043884825789
LatentSpace3	Caudate	3621	Nucleus accumbens	0.902612203083402
LatentSpace3	Caudate	3621	Fundus of striatum	0.8887895469397236
LatentSpace3	Caudate	3621	Olfactory tubercle	0.8429371652050465
LatentSpace3	Caudate	3657	Caudoputamen	0.9653340233360553
LatentSpace3	Caudate	3657	Nucleus accumbens	0.8434265965185832
LatentSpace3	Caudate	3657	Fundus of striatum	0.8310233151967688
LatentSpace3	Caudate	3657	Olfactory tubercle	0.7779487166687437
LatentSpace3	Caudate	3662	Caudoputamen	0.967552287788091
LatentSpace3	Caudate	3662	Nucleus accumbens	0.8654098905143879
LatentSpace3	Caudate	3662	Fundus of striatum	0.8562102717998445
LatentSpace3	Caudate	3662	Olfactory tubercle	0.804649765010709
LatentSpace3	Caudate	3663	Caudoputamen	0.9759080416862005
LatentSpace3	Caudate	3663	Nucleus accumbens	0.8918229725407474
LatentSpace3	Caudate	3663	Fundus of striatum	0.8840566746732277
LatentSpace3	Caudate	3663	Olfactory tubercle	0.8323390801699311
LatentSpace3	Putamen	60	Caudoputamen	0.8764264003206702
LatentSpace3	Putamen	60	Nucleus accumbens	0.763368101066866
LatentSpace3	Putamen	60	Fundus of striatum	0.760099593535599
LatentSpace3	Putamen	60	Olfactory tubercle	0.7083510118070263
LatentSpace3	Putamen	103	Caudoputamen	0.92796261251458
LatentSpace3	Putamen	103	Nucleus accumbens	0.8216656947060046
LatentSpace3	Putamen	103	Fundus of striatum	0.8169518191432074
LatentSpace3	Putamen	103	Olfactory tubercle	0.7640492483673779
LatentSpace3	Putamen	137	Caudoputamen	0.9348527894464342
LatentSpace3	Putamen	137	Nucleus accumbens	0.763811609425452
LatentSpace3	Putamen	137	Fundus of striatum	0.7548984353511986
LatentSpace3	Putamen	137	Olfactory tubercle	0.6964911456357582
LatentSpace3	Putamen	165	Caudoputamen	0.9370396645698665
LatentSpace3	Putamen	165	Nucleus accumbens	0.7813944047573002
LatentSpace3	Putamen	165	Fundus of striatum	0.7804735795691139
LatentSpace3	Putamen	165	Olfactory tubercle	0.7184524520027502
LatentSpace3	Putamen	174	Caudoputamen	0.9311038939926582
LatentSpace3	Putamen	174	Nucleus accumbens	0.7796498753958857
LatentSpace3	Putamen	174	Fundus of striatum	0.7683351617031878
LatentSpace3	Putamen	174	Olfactory tubercle	0.7157354282287455
LatentSpace3	Putamen	423	Caudoputamen	0.9687502449780196
LatentSpace3	Putamen	423	Nucleus accumbens	0.810613314778181
LatentSpace3	Putamen	423	Fundus of striatum	0.8079200279179883
LatentSpace3	Putamen	423	Olfactory tubercle	0.7415965789959271
LatentSpace3	Putamen	451	Caudoputamen	0.9690705708080201
LatentSpace3	Putamen	451	Nucleus accumbens	0.8126566471167216
LatentSpace3	Putamen	451	Fundus of striatum	0.8133859582121095
LatentSpace3	Putamen	451	Olfactory tubercle	0.7482158879496281
LatentSpace3	Putamen	455	Caudoputamen	0.9539105422077764
LatentSpace3	Putamen	455	Nucleus accumbens	0.7918417404020802
LatentSpace3	Putamen	455	Fundus of striatum	0.7890370199835381
LatentSpace3	Putamen	455	Olfactory tubercle	0.7249335131857884
LatentSpace3	Putamen	499	Caudoputamen	0.9711181672935406
LatentSpace3	Putamen	499	Nucleus accumbens	0.8353376353187058
LatentSpace3	Putamen	499	Fundus of striatum	0.8270748916169156
LatentSpace3	Putamen	499	Olfactory tubercle	0.7710112715395262
LatentSpace3	Putamen	625	Caudoputamen	0.9780996063738356
LatentSpace3	Putamen	625	Nucleus accumbens	0.8815297798695685
LatentSpace3	Putamen	625	Fundus of striatum	0.8691685087223128
LatentSpace3	Putamen	625	Olfactory tubercle	0.8147026226748202
LatentSpace3	Putamen	648	Caudoputamen	0.9805929398193313
LatentSpace3	Putamen	648	Nucleus accumbens	0.882891489875447
LatentSpace3	Putamen	648	Fundus of striatum	0.8669256800008394
LatentSpace3	Putamen	648	Olfactory tubercle	0.8119149264287783
LatentSpace3	Putamen	649	Caudoputamen	0.9781007028950914
LatentSpace3	Putamen	649	Nucleus accumbens	0.8498161028002835
LatentSpace3	Putamen	649	Fundus of striatum	0.8320789021358636
LatentSpace3	Putamen	649	Olfactory tubercle	0.7792040442358835
LatentSpace3	Putamen	652	Caudoputamen	0.9618017278182182
LatentSpace3	Putamen	652	Nucleus accumbens	0.8366090829026155
LatentSpace3	Putamen	652	Fundus of striatum	0.8289132954198103
LatentSpace3	Putamen	652	Olfactory tubercle	0.7739085614945553
LatentSpace3	Putamen	876	Caudoputamen	0.969880358560164
LatentSpace3	Putamen	876	Nucleus accumbens	0.8495891437823894
LatentSpace3	Putamen	876	Fundus of striatum	0.8345242417055398
LatentSpace3	Putamen	876	Olfactory tubercle	0.7883010504843218
LatentSpace3	Putamen	886	Caudoputamen	0.9750393936042174
LatentSpace3	Putamen	886	Nucleus accumbens	0.8576138836820958
LatentSpace3	Putamen	886	Fundus of striatum	0.845446969672499
LatentSpace3	Putamen	886	Olfactory tubercle	0.7915379763844012
LatentSpace3	Putamen	888	Caudoputamen	0.973280726600158
LatentSpace3	Putamen	888	Nucleus accumbens	0.8549683692116327
LatentSpace3	Putamen	888	Fundus of striatum	0.8450157574093946
LatentSpace3	Putamen	888	Olfactory tubercle	0.7928394545940012
LatentSpace3	Putamen	925	Caudoputamen	0.9363965093176617
LatentSpace3	Putamen	925	Nucleus accumbens	0.7781252429978955
LatentSpace3	Putamen	925	Fundus of striatum	0.7714239210453023
LatentSpace3	Putamen	925	Olfactory tubercle	0.7237160072686587
LatentSpace3	Putamen	927	Caudoputamen	0.9233716103495719
LatentSpace3	Putamen	927	Nucleus accumbens	0.77686901055512
LatentSpace3	Putamen	927	Fundus of striatum	0.7643524569373021
LatentSpace3	Putamen	927	Olfactory tubercle	0.7200462197631236
LatentSpace3	Putamen	928	Caudoputamen	0.8984231839064464
LatentSpace3	Putamen	928	Nucleus accumbens	0.7456626008304333
LatentSpace3	Putamen	928	Fundus of striatum	0.7335524305294341
LatentSpace3	Putamen	928	Olfactory tubercle	0.6907070651909473
LatentSpace3	Putamen	936	Caudoputamen	0.9019760156799269
LatentSpace3	Putamen	936	Nucleus accumbens	0.7555290383007061
LatentSpace3	Putamen	936	Fundus of striatum	0.7458473493081906
LatentSpace3	Putamen	936	Olfactory tubercle	0.6930778613824723
LatentSpace3	Putamen	980	Caudoputamen	0.9717744834675163
LatentSpace3	Putamen	980	Nucleus accumbens	0.8085447956020302
LatentSpace3	Putamen	980	Fundus of striatum	0.7998193361440556
LatentSpace3	Putamen	980	Olfactory tubercle	0.7343302865618975
LatentSpace3	Putamen	1044	Caudoputamen	0.9707910319818438
LatentSpace3	Putamen	1044	Nucleus accumbens	0.7904291400097431
LatentSpace3	Putamen	1044	Fundus of striatum	0.7781503433805734
LatentSpace3	Putamen	1044	Olfactory tubercle	0.7184743605989227
LatentSpace3	Putamen	1048	Caudoputamen	0.9770994313699763
LatentSpace3	Putamen	1048	Nucleus accumbens	0.8207578348367307
LatentSpace3	Putamen	1048	Fundus of striatum	0.8151318644271087
LatentSpace3	Putamen	1048	Olfactory tubercle	0.7548294779508202
LatentSpace3	Putamen	1240	Caudoputamen	0.9775662048963003
LatentSpace3	Putamen	1240	Nucleus accumbens	0.8148061550835549
LatentSpace3	Putamen	1240	Fundus of striatum	0.8004626195189388
LatentSpace3	Putamen	1240	Olfactory tubercle	0.7419944947156797
LatentSpace3	Putamen	1242	Caudoputamen	0.9663913542254556
LatentSpace3	Putamen	1242	Nucleus accumbens	0.7526492577321523
LatentSpace3	Putamen	1242	Fundus of striatum	0.7483539246751937
LatentSpace3	Putamen	1242	Olfactory tubercle	0.6803621480275314
LatentSpace3	Putamen	1244	Caudoputamen	0.9741078745618293
LatentSpace3	Putamen	1244	Nucleus accumbens	0.7651269676339658
LatentSpace3	Putamen	1244	Fundus of striatum	0.7592988011163033
LatentSpace3	Putamen	1244	Olfactory tubercle	0.6916764567891294
LatentSpace3	Putamen	1250	Caudoputamen	0.9759408639585623
LatentSpace3	Putamen	1250	Nucleus accumbens	0.7874463673800721
LatentSpace3	Putamen	1250	Fundus of striatum	0.7813390032451389
LatentSpace3	Putamen	1250	Olfactory tubercle	0.7162422398379159
LatentSpace3	Putamen	1255	Caudoputamen	0.9699014181564488
LatentSpace3	Putamen	1255	Nucleus accumbens	0.7882539278710775
LatentSpace3	Putamen	1255	Fundus of striatum	0.7805137314004593
LatentSpace3	Putamen	1255	Olfactory tubercle	0.7172142776554473
LatentSpace3	Putamen	1259	Caudoputamen	0.9671369571482233
LatentSpace3	Putamen	1259	Nucleus accumbens	0.7650241602844781
LatentSpace3	Putamen	1259	Fundus of striatum	0.7491285620412165
LatentSpace3	Putamen	1259	Olfactory tubercle	0.6883765081020301
LatentSpace3	Putamen	1307	Caudoputamen	0.9642538373623979
LatentSpace3	Putamen	1307	Nucleus accumbens	0.7724823983318163
LatentSpace3	Putamen	1307	Fundus of striatum	0.7642477488130708
LatentSpace3	Putamen	1307	Olfactory tubercle	0.700453464823521
LatentSpace3	Putamen	1326	Caudoputamen	0.9499169952755778
LatentSpace3	Putamen	1326	Nucleus accumbens	0.7548946807981398
LatentSpace3	Putamen	1326	Fundus of striatum	0.7437823348841057
LatentSpace3	Putamen	1326	Olfactory tubercle	0.6818233371015298
LatentSpace3	Putamen	1517	Caudoputamen	0.9848606374772502
LatentSpace3	Putamen	1517	Nucleus accumbens	0.8102396501623633
LatentSpace3	Putamen	1517	Fundus of striatum	0.8063185593000459
LatentSpace3	Putamen	1517	Olfactory tubercle	0.7397862133415459
LatentSpace3	Putamen	1539	Caudoputamen	0.98003144281774
LatentSpace3	Putamen	1539	Nucleus accumbens	0.7900423936810773
LatentSpace3	Putamen	1539	Fundus of striatum	0.7880143964063757
LatentSpace3	Putamen	1539	Olfactory tubercle	0.7168922728225073
LatentSpace3	Putamen	1773	Caudoputamen	0.9690490065275008
LatentSpace3	Putamen	1773	Nucleus accumbens	0.7474493888397716
LatentSpace3	Putamen	1773	Fundus of striatum	0.742178699956228
LatentSpace3	Putamen	1773	Olfactory tubercle	0.6728722622347809
LatentSpace3	Putamen	1849	Caudoputamen	0.9709959886789575
LatentSpace3	Putamen	1849	Nucleus accumbens	0.8730210101655429
LatentSpace3	Putamen	1849	Fundus of striatum	0.8588841029132016
LatentSpace3	Putamen	1849	Olfactory tubercle	0.8062870104807324
LatentSpace3	Putamen	1957	Caudoputamen	0.9617806746393278
LatentSpace3	Putamen	1957	Nucleus accumbens	0.8420075039658603
LatentSpace3	Putamen	1957	Fundus of striatum	0.835908107371858
LatentSpace3	Putamen	1957	Olfactory tubercle	0.7802153662955371
LatentSpace3	Putamen	2028	Caudoputamen	0.9570167837481498
LatentSpace3	Putamen	2028	Nucleus accumbens	0.8430113694667543
LatentSpace3	Putamen	2028	Fundus of striatum	0.8445537494360897
LatentSpace3	Putamen	2028	Olfactory tubercle	0.7928803892179025
LatentSpace3	Putamen	2160	Caudoputamen	0.9596398005026922
LatentSpace3	Putamen	2160	Nucleus accumbens	0.7825610571520866
LatentSpace3	Putamen	2160	Fundus of striatum	0.7825439734482974
LatentSpace3	Putamen	2160	Olfactory tubercle	0.7162790036521053
LatentSpace3	Putamen	2164	Caudoputamen	0.9695663285674955
LatentSpace3	Putamen	2164	Nucleus accumbens	0.814851954277296
LatentSpace3	Putamen	2164	Fundus of striatum	0.8192587555520772
LatentSpace3	Putamen	2164	Olfactory tubercle	0.7540664419723799
LatentSpace3	Putamen	2255	Caudoputamen	0.8927234490877373
LatentSpace3	Putamen	2255	Nucleus accumbens	0.7756282537472743
LatentSpace3	Putamen	2255	Fundus of striatum	0.7714388478023954
LatentSpace3	Putamen	2255	Olfactory tubercle	0.7203360757428692
LatentSpace3	Putamen	2267	Caudoputamen	0.93704513720543825
LatentSpace3	Putamen	2267	Nucleus accumbens	0.8029155410165626
LatentSpace3	Putamen	2267	Fundus of striatum	0.7910188275834078
LatentSpace3	Putamen	2267	Olfactory tubercle	0.7418514104856203
LatentSpace3	Putamen	2280	Caudoputamen	0.8775919325883116
LatentSpace3	Putamen	2280	Nucleus accumbens	0.7874780585076389
LatentSpace3	Putamen	2280	Fundus of striatum	0.7850406076099118
LatentSpace3	Putamen	2280	Olfactory tubercle	0.7449073480850708
LatentSpace3	Putamen	2343	Caudoputamen	0.9632616156758643
LatentSpace3	Putamen	2343	Nucleus accumbens	0.7755836711349711
LatentSpace3	Putamen	2343	Fundus of striatum	0.7744972459198475
LatentSpace3	Putamen	2343	Olfactory tubercle	0.7045978004714303
LatentSpace3	Putamen	2346	Caudoputamen	0.9751933024509853
LatentSpace3	Putamen	2346	Nucleus accumbens	0.8230521371716764
LatentSpace3	Putamen	2346	Fundus of striatum	0.8124464501953444
LatentSpace3	Putamen	2346	Olfactory tubercle	0.752395940209223
LatentSpace3	Putamen	2364	Caudoputamen	0.9472571175553731
LatentSpace3	Putamen	2364	Nucleus accumbens	0.8906718401696655
LatentSpace3	Putamen	2364	Fundus of striatum	0.882271443456345
LatentSpace3	Putamen	2364	Olfactory tubercle	0.8437811739780234
LatentSpace3	Putamen	2386	Caudoputamen	0.9587627399997203
LatentSpace3	Putamen	2386	Nucleus accumbens	0.8981672675471435
LatentSpace3	Putamen	2386	Fundus of striatum	0.8854294749947975
LatentSpace3	Putamen	2386	Olfactory tubercle	0.8420596971774585
LatentSpace3	Putamen	2554	Caudoputamen	0.9610170333322163
LatentSpace3	Putamen	2554	Nucleus accumbens	0.7906793413194201
LatentSpace3	Putamen	2554	Fundus of striatum	0.7915618099643147
LatentSpace3	Putamen	2554	Olfactory tubercle	0.7268942122270367
LatentSpace3	Putamen	2578	Caudoputamen	0.9702332268232475
LatentSpace3	Putamen	2578	Nucleus accumbens	0.7922318702268957
LatentSpace3	Putamen	2578	Fundus of striatum	0.7828509079597468
LatentSpace3	Putamen	2578	Olfactory tubercle	0.7252533571764825
LatentSpace3	Putamen	2625	Caudoputamen	0.9224099187646727
LatentSpace3	Putamen	2625	Nucleus accumbens	0.7597009241027274
LatentSpace3	Putamen	2625	Fundus of striatum	0.7494819042412089
LatentSpace3	Putamen	2625	Olfactory tubercle	0.6961093079850668
LatentSpace3	Putamen	2717	Caudoputamen	0.951320306260044
LatentSpace3	Putamen	2717	Nucleus accumbens	0.8517137107150609
LatentSpace3	Putamen	2717	Fundus of striatum	0.8446620091714909
LatentSpace3	Putamen	2717	Olfactory tubercle	0.7972292511387136
LatentSpace3	Putamen	2775	Caudoputamen	0.9731641255653972
LatentSpace3	Putamen	2775	Nucleus accumbens	0.7941450367735574
LatentSpace3	Putamen	2775	Fundus of striatum	0.7978446791213959
LatentSpace3	Putamen	2775	Olfactory tubercle	0.7307257920609762
LatentSpace3	Putamen	2849	Caudoputamen	0.9751978658337155
LatentSpace3	Putamen	2849	Nucleus accumbens	0.7949152324341506
LatentSpace3	Putamen	2849	Fundus of striatum	0.7988408838145992
LatentSpace3	Putamen	2849	Olfactory tubercle	0.7308949088676792
LatentSpace3	Putamen	2869	Caudoputamen	0.9757680391830388
LatentSpace3	Putamen	2869	Nucleus accumbens	0.8515502133350862
LatentSpace3	Putamen	2869	Fundus of striatum	0.8529142309859623
LatentSpace3	Putamen	2869	Olfactory tubercle	0.7933999994785351
LatentSpace3	Putamen	2875	Caudoputamen	0.965043218845056
LatentSpace3	Putamen	2875	Nucleus accumbens	0.8075493878911183
LatentSpace3	Putamen	2875	Fundus of striatum	0.8146805910319456
LatentSpace3	Putamen	2875	Olfactory tubercle	0.7455563265061664
LatentSpace3	Putamen	2878	Caudoputamen	0.9736308584965949
LatentSpace3	Putamen	2878	Nucleus accumbens	0.7931861300719845
LatentSpace3	Putamen	2878	Fundus of striatum	0.7945593144153166
LatentSpace3	Putamen	2878	Olfactory tubercle	0.7290442894231599
LatentSpace3	Putamen	2984	Caudoputamen	0.9746113411804571
LatentSpace3	Putamen	2984	Nucleus accumbens	0.8692460571673697
LatentSpace3	Putamen	2984	Fundus of striatum	0.8783307111102632
LatentSpace3	Putamen	2984	Olfactory tubercle	0.8126502946616452
LatentSpace3	Putamen	3064	Caudoputamen	0.9622020141446768
LatentSpace3	Putamen	3064	Nucleus accumbens	0.8121983670940408
LatentSpace3	Putamen	3064	Fundus of striatum	0.8053172182173376
LatentSpace3	Putamen	3064	Olfactory tubercle	0.7462808705079185
LatentSpace3	Putamen	3286	Caudoputamen	0.9747284873906743
LatentSpace3	Putamen	3286	Nucleus accumbens	0.8106435006204087
LatentSpace3	Putamen	3286	Fundus of striatum	0.8055078961813348
LatentSpace3	Putamen	3286	Olfactory tubercle	0.7441576148221664
LatentSpace3	Putamen	3298	Caudoputamen	0.9743598620575157
LatentSpace3	Putamen	3298	Nucleus accumbens	0.8116257008939323
LatentSpace3	Putamen	3298	Fundus of striatum	0.8025775330525692
LatentSpace3	Putamen	3298	Olfactory tubercle	0.74188530491561
LatentSpace3	Putamen	3301	Caudoputamen	0.9781810608265082
LatentSpace3	Putamen	3301	Nucleus accumbens	0.8343413251929775
LatentSpace3	Putamen	3301	Fundus of striatum	0.8237641803876936
LatentSpace3	Putamen	3301	Olfactory tubercle	0.7657292499030376
LatentSpace3	Putamen	3620	Caudoputamen	0.9808146206523908
LatentSpace3	Putamen	3620	Nucleus accumbens	0.8532512218827275
LatentSpace3	Putamen	3620	Fundus of striatum	0.8461639989662714
LatentSpace3	Putamen	3620	Olfactory tubercle	0.7907949938132578
LatentSpace3	Putamen	3656	Caudoputamen	0.9663051876268478
LatentSpace3	Putamen	3656	Nucleus accumbens	0.8189485540527622
LatentSpace3	Putamen	3656	Fundus of striatum	0.8068011292258391
LatentSpace3	Putamen	3656	Olfactory tubercle	0.7550601650273955
LatentSpace3	Nucleus accumbens	877	Caudoputamen	0.9364835848207617
LatentSpace3	Nucleus accumbens	877	Nucleus accumbens	0.9523932009321981
LatentSpace3	Nucleus accumbens	877	Fundus of striatum	0.9366571315466865
LatentSpace3	Nucleus accumbens	877	Olfactory tubercle	0.9022218895970056
LatentSpace3	Nucleus accumbens	921	Caudoputamen	0.9455490296402368
LatentSpace3	Nucleus accumbens	921	Nucleus accumbens	0.9314237524085238
LatentSpace3	Nucleus accumbens	921	Fundus of striatum	0.9242870325748281
LatentSpace3	Nucleus accumbens	921	Olfactory tubercle	0.8775403059769651
LatentSpace3	Nucleus accumbens	944	Caudoputamen	0.9713362678689078
LatentSpace3	Nucleus accumbens	944	Nucleus accumbens	0.8556210828728503
LatentSpace3	Nucleus accumbens	944	Fundus of striatum	0.8673065916088327
LatentSpace3	Nucleus accumbens	944	Olfactory tubercle	0.7948882378094455
LatentSpace3	Nucleus accumbens	945	Caudoputamen	0.9410598554249897
LatentSpace3	Nucleus accumbens	945	Nucleus accumbens	0.9164045340188574
LatentSpace3	Nucleus accumbens	945	Fundus of striatum	0.9164511869360964
LatentSpace3	Nucleus accumbens	945	Olfactory tubercle	0.8560965254504582
LatentSpace3	Nucleus accumbens	946	Caudoputamen	0.9549788107218125
LatentSpace3	Nucleus accumbens	946	Nucleus accumbens	0.9248183751473842
LatentSpace3	Nucleus accumbens	946	Fundus of striatum	0.9226907706482856
LatentSpace3	Nucleus accumbens	946	Olfactory tubercle	0.8648481542152459
LatentSpace3	Nucleus accumbens	968	Caudoputamen	0.9789174333312265
LatentSpace3	Nucleus accumbens	968	Nucleus accumbens	0.8548348471775112
LatentSpace3	Nucleus accumbens	968	Fundus of striatum	0.847927717348564
LatentSpace3	Nucleus accumbens	968	Olfactory tubercle	0.7811337740241598
LatentSpace3	Nucleus accumbens	971	Caudoputamen	0.984128796661294
LatentSpace3	Nucleus accumbens	971	Nucleus accumbens	0.8535316226731096
LatentSpace3	Nucleus accumbens	971	Fundus of striatum	0.8475488550175152
[truncated: 338,001 more rows]
