# Supplementary material for: Whole-brain comparison of rodent and human brains using spatial transcriptomics
Source: eLife. 2022 Nov 7;11:e79418. doi: 10.7554/eLife.79418 (PMC9708081; doi:10.7554/eLife.79418)
Supplement: Figure 6—source data 2. [file elife-79418-fig6-data2.csv]

VoxelID	MouseRegion	HumanRegion	AverageCorrelation
70	Olfactory tubercle	amygdala	0.6986935020174728
70	Olfactory tubercle	anterior orbital gyrus	0.2527433847235465
70	Olfactory tubercle	CA1 field	0.3801694127468623
70	Olfactory tubercle	CA2 field	0.41754203157418734
70	Olfactory tubercle	CA3 field	0.41681559110205035
70	Olfactory tubercle	CA4 field	0.48868893831724164
70	Olfactory tubercle	caudate nucleus	0.7137173892706844
70	Olfactory tubercle	cerebellar nuclei	0.30136607301589674
70	Olfactory tubercle	cingulate gyrus	0.26913126506068596
70	Olfactory tubercle	claustrum	0.46092570135773264
70	Olfactory tubercle	crus I	0.22732594594030228
70	Olfactory tubercle	crus II	0.22301185183387665
70	Olfactory tubercle	cuneus	0.03532198059646853
70	Olfactory tubercle	dentate gyrus	0.5611751587684747
70	Olfactory tubercle	epithalamus	0.42185323889467513
70	Olfactory tubercle	frontal operculum	0.2699109092791815
70	Olfactory tubercle	frontal pole	0.19366707185505952
70	Olfactory tubercle	fusiform gyrus	0.34130838622978243
70	Olfactory tubercle	globus pallidus	0.3870931163713318
70	Olfactory tubercle	gyrus rectus	0.3140473669033138
70	Olfactory tubercle	Heschl's gyrus	0.13257533106735467
70	Olfactory tubercle	hypothalamus	0.4093444510020345
70	Olfactory tubercle	III	0.2161604582780931
70	Olfactory tubercle	inferior colliculus	0.2885210954923524
70	Olfactory tubercle	inferior frontal gyrus	0.18140467024874096
70	Olfactory tubercle	inferior occipital gyrus	0.09331434592231802
70	Olfactory tubercle	inferior parietal lobule	0.12575605346447996
70	Olfactory tubercle	inferior rostral gyrus	0.3147273632957215
70	Olfactory tubercle	inferior temporal gyrus	0.2761196118313739
70	Olfactory tubercle	insula	0.3493450469640924
70	Olfactory tubercle	IV	0.22948903766475057
70	Olfactory tubercle	IX	0.2439894369715854
70	Olfactory tubercle	lateral orbital gyrus	0.23500565409567042
70	Olfactory tubercle	lingual gyrus	0.03884687009709656
70	Olfactory tubercle	medial orbital gyrus	0.2960173043628942
70	Olfactory tubercle	midbrain tegmentum	0.33438234854936777
70	Olfactory tubercle	middle frontal gyrus	0.13558605819188818
70	Olfactory tubercle	middle temporal gyrus	0.2271941018473
70	Olfactory tubercle	myelencephalon	0.3206859301648773
70	Olfactory tubercle	nucleus accumbens	0.7845212986347668
70	Olfactory tubercle	occipital pole	0.04102929605006827
70	Olfactory tubercle	occipito-temporal gyrus	0.12769232680123097
70	Olfactory tubercle	paracentral lobule, anterior part	0.05061863966492557
70	Olfactory tubercle	paracentral lobule, posterior part	0.06928523374329629
70	Olfactory tubercle	parahippocampal gyrus	0.4291131185149654
70	Olfactory tubercle	paraterminal gyrus	0.5086141578820386
70	Olfactory tubercle	parolfactory gyri	0.461711615263293
70	Olfactory tubercle	piriform cortex	0.6888397313706428
70	Olfactory tubercle	planum polare	0.3374720326549443
70	Olfactory tubercle	planum temporale	0.11211588445854252
70	Olfactory tubercle	pons	0.2698477838197589
70	Olfactory tubercle	postcentral gyrus	0.023160790960129712
70	Olfactory tubercle	posterior orbital gyrus	0.32003086283987664
70	Olfactory tubercle	precentral gyrus	0.011983005752065038
70	Olfactory tubercle	precuneus	0.1009483839147181
70	Olfactory tubercle	pretectal region	0.34477399725198266
70	Olfactory tubercle	putamen	0.6890977983131746
70	Olfactory tubercle	septal nuclei	0.5923081661033112
70	Olfactory tubercle	subiculum	0.3645784537973087
70	Olfactory tubercle	substantia innominata	0.6211716995090071
70	Olfactory tubercle	subthalamus	0.25964272438230857
70	Olfactory tubercle	superior colliculus	0.2734435039742701
70	Olfactory tubercle	superior frontal gyrus	0.17610719310056458
70	Olfactory tubercle	superior occipital gyrus	0.06964929818001936
70	Olfactory tubercle	superior parietal lobule	0.0464598990833866
70	Olfactory tubercle	superior rostral gyrus	0.28718604270199943
70	Olfactory tubercle	superior temporal gyrus	0.20553010954239503
70	Olfactory tubercle	temporal pole	0.409285705925103
70	Olfactory tubercle	thalamus	0.2427876475885732
70	Olfactory tubercle	transverse gyri	0.10335138511305285
70	Olfactory tubercle	V	0.21478552162017892
70	Olfactory tubercle	vermal I-II	0.2717777334865632
70	Olfactory tubercle	vermal III	0.25091509048380833
70	Olfactory tubercle	vermal IV	0.23732361749973233
70	Olfactory tubercle	vermal IX	0.23672008751308526
70	Olfactory tubercle	vermal V	0.2083810618382315
70	Olfactory tubercle	vermal VI	0.2656354913155819
70	Olfactory tubercle	vermal VIIAf	0.236006103498973
70	Olfactory tubercle	vermal VIIAt	0.22117070183833162
70	Olfactory tubercle	vermal VIIB	0.2524985463837263
70	Olfactory tubercle	vermal VIIIA	0.23985774839287338
70	Olfactory tubercle	vermal VIIIB	0.2624368214466932
70	Olfactory tubercle	vermal X	0.2817661476177936
70	Olfactory tubercle	VI	0.21552975709076524
70	Olfactory tubercle	VIIB	0.2253764717810748
70	Olfactory tubercle	VIIIA	0.2211327943005355
70	Olfactory tubercle	VIIIB	0.25133277751879873
70	Olfactory tubercle	X	0.2635586235617198
71	Olfactory tubercle	amygdala	0.7199658983533702
71	Olfactory tubercle	anterior orbital gyrus	0.22715060507334672
71	Olfactory tubercle	CA1 field	0.38956796853561904
71	Olfactory tubercle	CA2 field	0.4280263036670497
71	Olfactory tubercle	CA3 field	0.42993876803797537
71	Olfactory tubercle	CA4 field	0.5052193284673502
71	Olfactory tubercle	caudate nucleus	0.7230779655598787
71	Olfactory tubercle	cerebellar nuclei	0.3189074992331761
71	Olfactory tubercle	cingulate gyrus	0.24641274398982893
71	Olfactory tubercle	claustrum	0.43388739836964374
71	Olfactory tubercle	crus I	0.23388972102654043
71	Olfactory tubercle	crus II	0.22754299958050458
71	Olfactory tubercle	cuneus	0.01681190333703608
71	Olfactory tubercle	dentate gyrus	0.5644636183854173
71	Olfactory tubercle	epithalamus	0.4534640911964035
71	Olfactory tubercle	frontal operculum	0.23951296253635254
71	Olfactory tubercle	frontal pole	0.16769707388979027
71	Olfactory tubercle	fusiform gyrus	0.3150570843480678
71	Olfactory tubercle	globus pallidus	0.4044414677499482
71	Olfactory tubercle	gyrus rectus	0.2881731517213417
71	Olfactory tubercle	Heschl's gyrus	0.10692888420452266
71	Olfactory tubercle	hypothalamus	0.4460076660782286
71	Olfactory tubercle	III	0.22859204961982577
71	Olfactory tubercle	inferior colliculus	0.31940653533334606
71	Olfactory tubercle	inferior frontal gyrus	0.15267375626099955
71	Olfactory tubercle	inferior occipital gyrus	0.06953208278668983
71	Olfactory tubercle	inferior parietal lobule	0.10002388699832516
71	Olfactory tubercle	inferior rostral gyrus	0.2903790246830979
71	Olfactory tubercle	inferior temporal gyrus	0.24824966984232874
71	Olfactory tubercle	insula	0.3229577209987958
71	Olfactory tubercle	IV	0.23738613215469567
71	Olfactory tubercle	IX	0.2456297581943274
71	Olfactory tubercle	lateral orbital gyrus	0.2070169930041384
71	Olfactory tubercle	lingual gyrus	0.01891458986058938
71	Olfactory tubercle	medial orbital gyrus	0.2700178409277934
71	Olfactory tubercle	midbrain tegmentum	0.36099064907481104
71	Olfactory tubercle	middle frontal gyrus	0.11057872330647608
71	Olfactory tubercle	middle temporal gyrus	0.19832048767613103
71	Olfactory tubercle	myelencephalon	0.3396735083894953
71	Olfactory tubercle	nucleus accumbens	0.8009523481800479
71	Olfactory tubercle	occipital pole	0.01907008308835315
71	Olfactory tubercle	occipito-temporal gyrus	0.10074652200663467
71	Olfactory tubercle	paracentral lobule, anterior part	0.02659413274260578
71	Olfactory tubercle	paracentral lobule, posterior part	0.04836637218698666
71	Olfactory tubercle	parahippocampal gyrus	0.41418134770834875
71	Olfactory tubercle	paraterminal gyrus	0.525662215973392
71	Olfactory tubercle	parolfactory gyri	0.449597011965547
71	Olfactory tubercle	piriform cortex	0.692474989603285
71	Olfactory tubercle	planum polare	0.30926419237147623
71	Olfactory tubercle	planum temporale	0.0910039137906654
71	Olfactory tubercle	pons	0.28918115269002526
71	Olfactory tubercle	postcentral gyrus	0.0016204899604442431
71	Olfactory tubercle	posterior orbital gyrus	0.29083281266662536
71	Olfactory tubercle	precentral gyrus	-0.01032856889771725
71	Olfactory tubercle	precuneus	0.07698339255993203
71	Olfactory tubercle	pretectal region	0.3751527961214776
71	Olfactory tubercle	putamen	0.6990345322045851
71	Olfactory tubercle	septal nuclei	0.6326631494639134
71	Olfactory tubercle	subiculum	0.379563341194947
71	Olfactory tubercle	substantia innominata	0.651035699232183
71	Olfactory tubercle	subthalamus	0.2808718731569396
71	Olfactory tubercle	superior colliculus	0.3083820311157304
71	Olfactory tubercle	superior frontal gyrus	0.1508950717329951
71	Olfactory tubercle	superior occipital gyrus	0.04798231708798308
71	Olfactory tubercle	superior parietal lobule	0.024208580802728766
71	Olfactory tubercle	superior rostral gyrus	0.2643160424061244
71	Olfactory tubercle	superior temporal gyrus	0.1777863050217901
71	Olfactory tubercle	temporal pole	0.38753402615585186
71	Olfactory tubercle	thalamus	0.27490308698928195
71	Olfactory tubercle	transverse gyri	0.0783619616494219
71	Olfactory tubercle	V	0.22145821286454165
71	Olfactory tubercle	vermal I-II	0.2900277321457643
71	Olfactory tubercle	vermal III	0.26198537537975136
71	Olfactory tubercle	vermal IV	0.24722929714865896
71	Olfactory tubercle	vermal IX	0.24747968876627507
71	Olfactory tubercle	vermal V	0.21492223838349372
71	Olfactory tubercle	vermal VI	0.27574026626246123
71	Olfactory tubercle	vermal VIIAf	0.24305112664271747
71	Olfactory tubercle	vermal VIIAt	0.22665501813516933
71	Olfactory tubercle	vermal VIIB	0.2618557172395688
71	Olfactory tubercle	vermal VIIIA	0.24773621776066493
71	Olfactory tubercle	vermal VIIIB	0.2756658796116051
71	Olfactory tubercle	vermal X	0.30443202439576084
71	Olfactory tubercle	VI	0.22267434868750427
71	Olfactory tubercle	VIIB	0.23185242391036354
71	Olfactory tubercle	VIIIA	0.2250811172860046
71	Olfactory tubercle	VIIIB	0.2589217806426861
71	Olfactory tubercle	X	0.2743024929510757
72	Olfactory tubercle	amygdala	0.7275428790837306
72	Olfactory tubercle	anterior orbital gyrus	0.18015757717138922
72	Olfactory tubercle	CA1 field	0.3692748400781631
72	Olfactory tubercle	CA2 field	0.4175329447563445
72	Olfactory tubercle	CA3 field	0.42566862425515084
72	Olfactory tubercle	CA4 field	0.5088754117486393
72	Olfactory tubercle	caudate nucleus	0.7644797844761745
72	Olfactory tubercle	cerebellar nuclei	0.32829612528277907
72	Olfactory tubercle	cingulate gyrus	0.1996142244667578
72	Olfactory tubercle	claustrum	0.3907714541885653
72	Olfactory tubercle	crus I	0.21662164174345477
72	Olfactory tubercle	crus II	0.2092018845977067
72	Olfactory tubercle	cuneus	0.005829872207618968
72	Olfactory tubercle	dentate gyrus	0.5510619364036722
72	Olfactory tubercle	epithalamus	0.4723630365613598
72	Olfactory tubercle	frontal operculum	0.19073634809128254
72	Olfactory tubercle	frontal pole	0.12109072762017599
72	Olfactory tubercle	fusiform gyrus	0.269141902178244
72	Olfactory tubercle	globus pallidus	0.42117028911992865
72	Olfactory tubercle	gyrus rectus	0.23812066461896783
72	Olfactory tubercle	Heschl's gyrus	0.07963060542571576
72	Olfactory tubercle	hypothalamus	0.4832813074053148
72	Olfactory tubercle	III	0.21706389494898576
72	Olfactory tubercle	inferior colliculus	0.3374648446519809
72	Olfactory tubercle	inferior frontal gyrus	0.1121813429922731
72	Olfactory tubercle	inferior occipital gyrus	0.04495926850273184
72	Olfactory tubercle	inferior parietal lobule	0.06532569171185106
72	Olfactory tubercle	inferior rostral gyrus	0.24241381174450197
72	Olfactory tubercle	inferior temporal gyrus	0.2020176815831999
72	Olfactory tubercle	insula	0.27676476392719096
72	Olfactory tubercle	IV	0.22137100545357896
72	Olfactory tubercle	IX	0.22608581364765692
72	Olfactory tubercle	lateral orbital gyrus	0.16336123906653202
72	Olfactory tubercle	lingual gyrus	0.00643858772760631
72	Olfactory tubercle	medial orbital gyrus	0.22068128618201252
72	Olfactory tubercle	midbrain tegmentum	0.38405292507591227
72	Olfactory tubercle	middle frontal gyrus	0.06942685923501668
72	Olfactory tubercle	middle temporal gyrus	0.1549921551399471
72	Olfactory tubercle	myelencephalon	0.3503392800152837
72	Olfactory tubercle	nucleus accumbens	0.8395645210960591
72	Olfactory tubercle	occipital pole	0.007515461348423047
72	Olfactory tubercle	occipito-temporal gyrus	0.06991893019794715
72	Olfactory tubercle	paracentral lobule, anterior part	-0.005306457559956534
72	Olfactory tubercle	paracentral lobule, posterior part	0.019481715141882832
72	Olfactory tubercle	parahippocampal gyrus	0.371807986149383
72	Olfactory tubercle	paraterminal gyrus	0.5074636170485587
72	Olfactory tubercle	parolfactory gyri	0.40721458909607144
72	Olfactory tubercle	piriform cortex	0.6714048500574736
72	Olfactory tubercle	planum polare	0.2655069105232025
72	Olfactory tubercle	planum temporale	0.05756343997091942
72	Olfactory tubercle	pons	0.30249768980795977
72	Olfactory tubercle	postcentral gyrus	-0.019711491143748358
72	Olfactory tubercle	posterior orbital gyrus	0.2443762517264432
72	Olfactory tubercle	precentral gyrus	-0.04108869946991421
72	Olfactory tubercle	precuneus	0.04383353108261319
72	Olfactory tubercle	pretectal region	0.39962478138334184
72	Olfactory tubercle	putamen	0.7423943154650976
72	Olfactory tubercle	septal nuclei	0.6756160947332143
72	Olfactory tubercle	subiculum	0.35614606442457125
72	Olfactory tubercle	substantia innominata	0.6926883048199952
72	Olfactory tubercle	subthalamus	0.2991207177969754
72	Olfactory tubercle	superior colliculus	0.33633444758579273
72	Olfactory tubercle	superior frontal gyrus	0.10655338605571789
72	Olfactory tubercle	superior occipital gyrus	0.02493122493631469
72	Olfactory tubercle	superior parietal lobule	-0.00304976278452195
72	Olfactory tubercle	superior rostral gyrus	0.21739614234341081
72	Olfactory tubercle	superior temporal gyrus	0.13644304279820857
72	Olfactory tubercle	temporal pole	0.34066945554595646
72	Olfactory tubercle	thalamus	0.3036997777270385
72	Olfactory tubercle	transverse gyri	0.0534972215957654
72	Olfactory tubercle	V	0.20479024709948834
72	Olfactory tubercle	vermal I-II	0.28453008457687473
72	Olfactory tubercle	vermal III	0.2470347996414114
72	Olfactory tubercle	vermal IV	0.23212913233407914
72	Olfactory tubercle	vermal IX	0.23435311138713122
72	Olfactory tubercle	vermal V	0.19827365327589605
72	Olfactory tubercle	vermal VI	0.26096615122804023
72	Olfactory tubercle	vermal VIIAf	0.22605075159713248
72	Olfactory tubercle	vermal VIIAt	0.20943459178223522
72	Olfactory tubercle	vermal VIIB	0.24804121260423834
72	Olfactory tubercle	vermal VIIIA	0.23076822276200487
72	Olfactory tubercle	vermal VIIIB	0.26329185580870046
72	Olfactory tubercle	vermal X	0.29925696402627877
72	Olfactory tubercle	VI	0.20612624170562935
72	Olfactory tubercle	VIIB	0.2148144320198445
72	Olfactory tubercle	VIIIA	0.20609430828826822
72	Olfactory tubercle	VIIIB	0.24371583783713338
72	Olfactory tubercle	X	0.25693520968361555
73	Olfactory tubercle	amygdala	0.7116047953335981
73	Olfactory tubercle	anterior orbital gyrus	0.19634174610910318
73	Olfactory tubercle	CA1 field	0.36005967766658364
73	Olfactory tubercle	CA2 field	0.4063979366876941
73	Olfactory tubercle	CA3 field	0.41300930580327944
73	Olfactory tubercle	CA4 field	0.4927862682559237
73	Olfactory tubercle	caudate nucleus	0.7636314996281912
73	Olfactory tubercle	cerebellar nuclei	0.31413046766819464
73	Olfactory tubercle	cingulate gyrus	0.21356663784573196
73	Olfactory tubercle	claustrum	0.40633358519190366
73	Olfactory tubercle	crus I	0.20937759348085797
73	Olfactory tubercle	crus II	0.20352721737225546
73	Olfactory tubercle	cuneus	0.019486899225543745
73	Olfactory tubercle	dentate gyrus	0.5477235701190661
73	Olfactory tubercle	epithalamus	0.44809444970860224
73	Olfactory tubercle	frontal operculum	0.2097886290937967
73	Olfactory tubercle	frontal pole	0.13718771288589057
73	Olfactory tubercle	fusiform gyrus	0.2843772511613951
73	Olfactory tubercle	globus pallidus	0.40750921805525964
73	Olfactory tubercle	gyrus rectus	0.2534354503339276
73	Olfactory tubercle	Heschl's gyrus	0.09721023249196613
73	Olfactory tubercle	hypothalamus	0.4571621676307363
73	Olfactory tubercle	III	0.20569010576408908
73	Olfactory tubercle	inferior colliculus	0.3160618373482033
73	Olfactory tubercle	inferior frontal gyrus	0.13122696820346028
73	Olfactory tubercle	inferior occipital gyrus	0.06179090969335628
73	Olfactory tubercle	inferior parietal lobule	0.08271525854541861
73	Olfactory tubercle	inferior rostral gyrus	0.25618631282193216
73	Olfactory tubercle	inferior temporal gyrus	0.21878117775772185
73	Olfactory tubercle	insula	0.292322924802445
73	Olfactory tubercle	IV	0.2128450412563353
73	Olfactory tubercle	IX	0.22244604992556555
73	Olfactory tubercle	lateral orbital gyrus	0.18118115815743444
73	Olfactory tubercle	lingual gyrus	0.02075695400412765
73	Olfactory tubercle	medial orbital gyrus	0.2364234031159393
73	Olfactory tubercle	midbrain tegmentum	0.3634469628500108
73	Olfactory tubercle	middle frontal gyrus	0.08600077443227198
73	Olfactory tubercle	middle temporal gyrus	0.17344550419246413
73	Olfactory tubercle	myelencephalon	0.3346750242057925
73	Olfactory tubercle	nucleus accumbens	0.8335457367404585
73	Olfactory tubercle	occipital pole	0.02323585762529965
73	Olfactory tubercle	occipito-temporal gyrus	0.08849554227569821
73	Olfactory tubercle	paracentral lobule, anterior part	0.012630224320004166
73	Olfactory tubercle	paracentral lobule, posterior part	0.033653455255181125
73	Olfactory tubercle	parahippocampal gyrus	0.37754717085715833
73	Olfactory tubercle	paraterminal gyrus	0.4948072262786723
73	Olfactory tubercle	parolfactory gyri	0.4134809928743369
73	Olfactory tubercle	piriform cortex	0.6654555521479469
73	Olfactory tubercle	planum polare	0.2831079579117317
73	Olfactory tubercle	planum temporale	0.07145292334802386
73	Olfactory tubercle	pons	0.2865267767010441
73	Olfactory tubercle	postcentral gyrus	-0.003548310913208437
73	Olfactory tubercle	posterior orbital gyrus	0.26281256867966724
73	Olfactory tubercle	precentral gyrus	-0.02438526488509108
73	Olfactory tubercle	precuneus	0.060375208834901106
73	Olfactory tubercle	pretectal region	0.37748940833769445
73	Olfactory tubercle	putamen	0.7412515072300685
73	Olfactory tubercle	septal nuclei	0.6497419640261721
73	Olfactory tubercle	subiculum	0.34321759730367646
73	Olfactory tubercle	substantia innominata	0.6734527621182428
73	Olfactory tubercle	subthalamus	0.2823902029322674
73	Olfactory tubercle	superior colliculus	0.31159519396100815
73	Olfactory tubercle	superior frontal gyrus	0.12288746106186199
73	Olfactory tubercle	superior occipital gyrus	0.04068909673733363
73	Olfactory tubercle	superior parietal lobule	0.012844813455669459
73	Olfactory tubercle	superior rostral gyrus	0.2314738398374695
73	Olfactory tubercle	superior temporal gyrus	0.1546591717193508
73	Olfactory tubercle	temporal pole	0.3520543780906175
73	Olfactory tubercle	thalamus	0.2796519159854183
73	Olfactory tubercle	transverse gyri	0.07112145806418683
73	Olfactory tubercle	V	0.19737823166860782
73	Olfactory tubercle	vermal I-II	0.26878410134077574
73	Olfactory tubercle	vermal III	0.23657798566314087
73	Olfactory tubercle	vermal IV	0.22261533180883863
73	Olfactory tubercle	vermal IX	0.2245736672357596
73	Olfactory tubercle	vermal V	0.19128232270114942
73	Olfactory tubercle	vermal VI	0.25078835191081295
73	Olfactory tubercle	vermal VIIAf	0.21845061996975468
73	Olfactory tubercle	vermal VIIAt	0.20327256711471078
73	Olfactory tubercle	vermal VIIB	0.23904316207401982
73	Olfactory tubercle	vermal VIIIA	0.22276748906068697
73	Olfactory tubercle	vermal VIIIB	0.2515869877556665
73	Olfactory tubercle	vermal X	0.2804446561715981
73	Olfactory tubercle	VI	0.19841072642182805
73	Olfactory tubercle	VIIB	0.20780303523693003
73	Olfactory tubercle	VIIIA	0.2008771062792092
73	Olfactory tubercle	VIIIB	0.23559579773967876
73	Olfactory tubercle	X	0.2463069147838247
74	Olfactory tubercle	amygdala	0.7055990066701012
74	Olfactory tubercle	anterior orbital gyrus	0.21328804185788103
74	Olfactory tubercle	CA1 field	0.3650209084137096
74	Olfactory tubercle	CA2 field	0.40770240298750265
74	Olfactory tubercle	CA3 field	0.4106187164580078
74	Olfactory tubercle	CA4 field	0.48957664639271825
74	Olfactory tubercle	caudate nucleus	0.749959529208574
74	Olfactory tubercle	cerebellar nuclei	0.2990313534411932
74	Olfactory tubercle	cingulate gyrus	0.2300176386983602
74	Olfactory tubercle	claustrum	0.42919954112155184
74	Olfactory tubercle	crus I	0.21023781898452626
74	Olfactory tubercle	crus II	0.20564895606296604
74	Olfactory tubercle	cuneus	0.018257490610402164
74	Olfactory tubercle	dentate gyrus	0.5479560185949421
74	Olfactory tubercle	epithalamus	0.42550223974031937
74	Olfactory tubercle	frontal operculum	0.22966712908093628
74	Olfactory tubercle	frontal pole	0.15455474407569048
74	Olfactory tubercle	fusiform gyrus	0.30446038183288915
74	Olfactory tubercle	globus pallidus	0.39349866411985257
74	Olfactory tubercle	gyrus rectus	0.2742156316593541
74	Olfactory tubercle	Heschl's gyrus	0.10478912594543995
74	Olfactory tubercle	hypothalamus	0.4273546456660469
74	Olfactory tubercle	III	0.20323812788146278
74	Olfactory tubercle	inferior colliculus	0.29382420366810064
74	Olfactory tubercle	inferior frontal gyrus	0.14469717098721296
74	Olfactory tubercle	inferior occipital gyrus	0.06695447461739408
74	Olfactory tubercle	inferior parietal lobule	0.09272592733706383
74	Olfactory tubercle	inferior rostral gyrus	0.275843083616328
74	Olfactory tubercle	inferior temporal gyrus	0.23785992588579394
74	Olfactory tubercle	insula	0.31218986573764157
74	Olfactory tubercle	IV	0.21372836363767317
74	Olfactory tubercle	IX	0.22668638539741234
74	Olfactory tubercle	lateral orbital gyrus	0.1974643280426848
74	Olfactory tubercle	lingual gyrus	0.021295267432018847
74	Olfactory tubercle	medial orbital gyrus	0.2558709814853474
74	Olfactory tubercle	midbrain tegmentum	0.34036618545283126
74	Olfactory tubercle	middle frontal gyrus	0.09785023290237559
74	Olfactory tubercle	middle temporal gyrus	0.18981591579989207
74	Olfactory tubercle	myelencephalon	0.31684525745566156
74	Olfactory tubercle	nucleus accumbens	0.8181965335442769
74	Olfactory tubercle	occipital pole	0.023117073876547812
74	Olfactory tubercle	occipito-temporal gyrus	0.0973993294911751
74	Olfactory tubercle	paracentral lobule, anterior part	0.017775269031635337
74	Olfactory tubercle	paracentral lobule, posterior part	0.038609260954994486
74	Olfactory tubercle	parahippocampal gyrus	0.39860072994481877
74	Olfactory tubercle	paraterminal gyrus	0.4948778159698525
74	Olfactory tubercle	parolfactory gyri	0.42991515247778034
74	Olfactory tubercle	piriform cortex	0.6783294602030681
74	Olfactory tubercle	planum polare	0.30134452832285624
74	Olfactory tubercle	planum temporale	0.0801398459800066
74	Olfactory tubercle	pons	0.26798904900192166
74	Olfactory tubercle	postcentral gyrus	-0.0016770641036517472
74	Olfactory tubercle	posterior orbital gyrus	0.2818412855738167
74	Olfactory tubercle	precentral gyrus	-0.020223043942548785
74	Olfactory tubercle	precuneus	0.06878139769857104
74	Olfactory tubercle	pretectal region	0.3536242099449576
74	Olfactory tubercle	putamen	0.7264344588926637
74	Olfactory tubercle	septal nuclei	0.620081969244808
74	Olfactory tubercle	subiculum	0.34702315109289794
74	Olfactory tubercle	substantia innominata	0.6471986450936158
74	Olfactory tubercle	subthalamus	0.26377523121584984
74	Olfactory tubercle	superior colliculus	0.28524117422661094
74	Olfactory tubercle	superior frontal gyrus	0.13693103239247592
74	Olfactory tubercle	superior occipital gyrus	0.04409889406714475
74	Olfactory tubercle	superior parietal lobule	0.018022417923377405
74	Olfactory tubercle	superior rostral gyrus	0.24805165398742837
74	Olfactory tubercle	superior temporal gyrus	0.16889335216401433
74	Olfactory tubercle	temporal pole	0.3741342057842054
74	Olfactory tubercle	thalamus	0.2583457772395318
74	Olfactory tubercle	transverse gyri	0.07758609441014622
74	Olfactory tubercle	V	0.19847928194381234
74	Olfactory tubercle	vermal I-II	0.25971741807874366
74	Olfactory tubercle	vermal III	0.2347746524553294
74	Olfactory tubercle	vermal IV	0.2215584322531041
74	Olfactory tubercle	vermal IX	0.22110416418255718
74	Olfactory tubercle	vermal V	0.19227369377194134
74	Olfactory tubercle	vermal VI	0.24925468809309145
74	Olfactory tubercle	vermal VIIAf	0.21920835698850738
74	Olfactory tubercle	vermal VIIAt	0.20536983944801918
74	Olfactory tubercle	vermal VIIB	0.23686456883207813
74	Olfactory tubercle	vermal VIIIA	0.22305999502988305
74	Olfactory tubercle	vermal VIIIB	0.24697623321051113
74	Olfactory tubercle	vermal X	0.2676763368260202
74	Olfactory tubercle	VI	0.19911591339083745
74	Olfactory tubercle	VIIB	0.2086502455152057
74	Olfactory tubercle	VIIIA	0.2037361040826113
74	Olfactory tubercle	VIIIB	0.23565205702801126
74	Olfactory tubercle	X	0.24477670769977894
75	Olfactory tubercle	amygdala	0.6977069667246293
75	Olfactory tubercle	anterior orbital gyrus	0.2378389346392192
75	Olfactory tubercle	CA1 field	0.3749958627685575
75	Olfactory tubercle	CA2 field	0.4102797798914864
75	Olfactory tubercle	CA3 field	0.4104979340055712
75	Olfactory tubercle	CA4 field	0.4798900623433904
75	Olfactory tubercle	caudate nucleus	0.7282289823263218
75	Olfactory tubercle	cerebellar nuclei	0.304903015516498
75	Olfactory tubercle	cingulate gyrus	0.2539957809841586
75	Olfactory tubercle	claustrum	0.44906736314236406
75	Olfactory tubercle	crus I	0.2144649105456438
75	Olfactory tubercle	crus II	0.21074767360634514
75	Olfactory tubercle	cuneus	0.023944643255400442
75	Olfactory tubercle	dentate gyrus	0.5499443715944694
75	Olfactory tubercle	epithalamus	0.4226135716736347
75	Olfactory tubercle	frontal operculum	0.2532671788648231
75	Olfactory tubercle	frontal pole	0.1796387319242057
75	Olfactory tubercle	fusiform gyrus	0.3241425074605491
75	Olfactory tubercle	globus pallidus	0.39795287013017977
75	Olfactory tubercle	gyrus rectus	0.297278466063585
75	Olfactory tubercle	Heschl's gyrus	0.11817868573255289
75	Olfactory tubercle	hypothalamus	0.4190358039368934
75	Olfactory tubercle	III	0.206234685364727
75	Olfactory tubercle	inferior colliculus	0.2921517472476053
75	Olfactory tubercle	inferior frontal gyrus	0.16604330114508692
75	Olfactory tubercle	inferior occipital gyrus	0.08132228886057248
75	Olfactory tubercle	inferior parietal lobule	0.11166745898303898
75	Olfactory tubercle	inferior rostral gyrus	0.2967262453867612
75	Olfactory tubercle	inferior temporal gyrus	0.2591362430096753
75	Olfactory tubercle	insula	0.3307896438108437
75	Olfactory tubercle	IV	0.21810312651827543
75	Olfactory tubercle	IX	0.23354650033154314
75	Olfactory tubercle	lateral orbital gyrus	0.21856044686386303
75	Olfactory tubercle	lingual gyrus	0.02695771458769268
75	Olfactory tubercle	medial orbital gyrus	0.27960822876925906
75	Olfactory tubercle	midbrain tegmentum	0.341805316795843
75	Olfactory tubercle	middle frontal gyrus	0.1216789060180216
75	Olfactory tubercle	middle temporal gyrus	0.21153570977929806
75	Olfactory tubercle	myelencephalon	0.3227698388804421
75	Olfactory tubercle	nucleus accumbens	0.799133981168562
75	Olfactory tubercle	occipital pole	0.02709379999041574
75	Olfactory tubercle	occipito-temporal gyrus	0.11459047467646699
75	Olfactory tubercle	paracentral lobule, anterior part	0.04118938591940131
75	Olfactory tubercle	paracentral lobule, posterior part	0.054938127803776604
75	Olfactory tubercle	parahippocampal gyrus	0.4135260993150226
75	Olfactory tubercle	paraterminal gyrus	0.500196283118981
75	Olfactory tubercle	parolfactory gyri	0.44876992080971406
75	Olfactory tubercle	piriform cortex	0.6786952551388657
75	Olfactory tubercle	planum polare	0.32085187468234055
75	Olfactory tubercle	planum temporale	0.09781057684830712
75	Olfactory tubercle	pons	0.27427190401082924
75	Olfactory tubercle	postcentral gyrus	0.013685354117909845
75	Olfactory tubercle	posterior orbital gyrus	0.30515907941841797
75	Olfactory tubercle	precentral gyrus	0.0037954975798656257
75	Olfactory tubercle	precuneus	0.08851954636336365
75	Olfactory tubercle	pretectal region	0.3537330937611065
75	Olfactory tubercle	putamen	0.7058868075493154
75	Olfactory tubercle	septal nuclei	0.6065266994348245
75	Olfactory tubercle	subiculum	0.3604565465928161
75	Olfactory tubercle	substantia innominata	0.6374055274656559
75	Olfactory tubercle	subthalamus	0.2671217474727901
75	Olfactory tubercle	superior colliculus	0.28191318973612167
75	Olfactory tubercle	superior frontal gyrus	0.16186261201806268
75	Olfactory tubercle	superior occipital gyrus	0.05858062159618456
75	Olfactory tubercle	superior parietal lobule	0.03594642988203159
75	Olfactory tubercle	superior rostral gyrus	0.2712602006324602
75	Olfactory tubercle	superior temporal gyrus	0.1909065826784117
75	Olfactory tubercle	temporal pole	0.3923584367327243
75	Olfactory tubercle	thalamus	0.24934598607828812
75	Olfactory tubercle	transverse gyri	0.09110499986090212
75	Olfactory tubercle	V	0.20285909495499013
75	Olfactory tubercle	vermal I-II	0.26002891597626265
75	Olfactory tubercle	vermal III	0.23817238565204552
75	Olfactory tubercle	vermal IV	0.22499659177498868
75	Olfactory tubercle	vermal IX	0.2239425763198102
75	Olfactory tubercle	vermal V	0.19623880557814746
75	Olfactory tubercle	vermal VI	0.25298302590907595
75	Olfactory tubercle	vermal VIIAf	0.22376708678678647
75	Olfactory tubercle	vermal VIIAt	0.20999212462225053
75	Olfactory tubercle	vermal VIIB	0.2394621323419263
75	Olfactory tubercle	vermal VIIIA	0.2269408156650778
75	Olfactory tubercle	vermal VIIIB	0.24962557714956957
75	Olfactory tubercle	vermal X	0.26746244368508604
75	Olfactory tubercle	VI	0.20305536380700762
75	Olfactory tubercle	VIIB	0.21327114707934766
75	Olfactory tubercle	VIIIA	0.20912526343385468
75	Olfactory tubercle	VIIIB	0.240077560209087
75	Olfactory tubercle	X	0.2501082396764962
76	Olfactory tubercle	amygdala	0.7292172874884
76	Olfactory tubercle	anterior orbital gyrus	0.21905421539863243
76	Olfactory tubercle	CA1 field	0.39827627345799343
76	Olfactory tubercle	CA2 field	0.43278687139844724
76	Olfactory tubercle	CA3 field	0.4337472620009179
76	Olfactory tubercle	CA4 field	0.504325388004535
76	Olfactory tubercle	caudate nucleus	0.7329642292454572
76	Olfactory tubercle	cerebellar nuclei	0.3129062388974751
76	Olfactory tubercle	cingulate gyrus	0.23871149332313005
76	Olfactory tubercle	claustrum	0.43095437610053144
76	Olfactory tubercle	crus I	0.21023686070646602
76	Olfactory tubercle	crus II	0.20488699777831668
76	Olfactory tubercle	cuneus	-0.003682161278040667
76	Olfactory tubercle	dentate gyrus	0.5629286159707698
76	Olfactory tubercle	epithalamus	0.44485960911781924
76	Olfactory tubercle	frontal operculum	0.23024570925485982
76	Olfactory tubercle	frontal pole	0.15782688445674659
76	Olfactory tubercle	fusiform gyrus	0.3076632840292331
76	Olfactory tubercle	globus pallidus	0.40486967582824696
76	Olfactory tubercle	gyrus rectus	0.2816102206648783
76	Olfactory tubercle	Heschl's gyrus	0.08950272765539917
76	Olfactory tubercle	hypothalamus	0.4527435077660251
76	Olfactory tubercle	III	0.20636770146212047
76	Olfactory tubercle	inferior colliculus	0.31107721717730386
76	Olfactory tubercle	inferior frontal gyrus	0.1397121208354239
76	Olfactory tubercle	inferior occipital gyrus	0.053078927922243946
76	Olfactory tubercle	inferior parietal lobule	0.086264974908828
76	Olfactory tubercle	inferior rostral gyrus	0.2822497833070973
76	Olfactory tubercle	inferior temporal gyrus	0.23852647902255628
76	Olfactory tubercle	insula	0.3136884555758044
76	Olfactory tubercle	IV	0.21456394723488764
76	Olfactory tubercle	IX	0.22481587825230748
76	Olfactory tubercle	lateral orbital gyrus	0.19446429662941833
76	Olfactory tubercle	lingual gyrus	-0.0019299812982002272
76	Olfactory tubercle	medial orbital gyrus	0.26265877402057886
76	Olfactory tubercle	midbrain tegmentum	0.36139673997155713
76	Olfactory tubercle	middle frontal gyrus	0.09934348167495083
76	Olfactory tubercle	middle temporal gyrus	0.18703962741598337
76	Olfactory tubercle	myelencephalon	0.33388639780270274
76	Olfactory tubercle	nucleus accumbens	0.815542676732357
76	Olfactory tubercle	occipital pole	-0.0035242600805422976
76	Olfactory tubercle	occipito-temporal gyrus	0.08589715851392771
76	Olfactory tubercle	paracentral lobule, anterior part	0.014772708892801674
76	Olfactory tubercle	paracentral lobule, posterior part	0.03233020277400514
76	Olfactory tubercle	parahippocampal gyrus	0.411893670931828
76	Olfactory tubercle	paraterminal gyrus	0.5304199060235185
76	Olfactory tubercle	parolfactory gyri	0.4517957894915895
76	Olfactory tubercle	piriform cortex	0.6967275464550211
76	Olfactory tubercle	planum polare	0.3002949760420248
76	Olfactory tubercle	planum temporale	0.07648301042978538
76	Olfactory tubercle	pons	0.2863413071306058
76	Olfactory tubercle	postcentral gyrus	-0.013753480835082441
76	Olfactory tubercle	posterior orbital gyrus	0.28219508223892936
76	Olfactory tubercle	precentral gyrus	-0.02180960108344898
76	Olfactory tubercle	precuneus	0.06351652790630294
76	Olfactory tubercle	pretectal region	0.37514462082070055
76	Olfactory tubercle	putamen	0.7093066229511967
76	Olfactory tubercle	septal nuclei	0.6435880094846158
76	Olfactory tubercle	subiculum	0.3912234170534635
76	Olfactory tubercle	substantia innominata	0.6653095641694865
76	Olfactory tubercle	subthalamus	0.27942430425693077
76	Olfactory tubercle	superior colliculus	0.30739248960864507
76	Olfactory tubercle	superior frontal gyrus	0.14121018237792454
76	Olfactory tubercle	superior occipital gyrus	0.032255226933256935
76	Olfactory tubercle	superior parietal lobule	0.010300144654936415
76	Olfactory tubercle	superior rostral gyrus	0.257149424403794
76	Olfactory tubercle	superior temporal gyrus	0.16683997175176188
76	Olfactory tubercle	temporal pole	0.38401932899504804
76	Olfactory tubercle	thalamus	0.2679951453301429
76	Olfactory tubercle	transverse gyri	0.062161728240747796
76	Olfactory tubercle	V	0.1984138474201518
76	Olfactory tubercle	vermal I-II	0.26480300039251176
76	Olfactory tubercle	vermal III	0.2369345792137413
76	Olfactory tubercle	vermal IV	0.2231724719135794
76	Olfactory tubercle	vermal IX	0.22358409268663315
76	Olfactory tubercle	vermal V	0.19154776817704763
76	Olfactory tubercle	vermal VI	0.2516534047391859
76	Olfactory tubercle	vermal VIIAf	0.21948879449534162
76	Olfactory tubercle	vermal VIIAt	0.20489825347020968
76	Olfactory tubercle	vermal VIIB	0.236896186985757
76	Olfactory tubercle	vermal VIIIA	0.22366555556373047
76	Olfactory tubercle	vermal VIIIB	0.25078511195299336
76	Olfactory tubercle	vermal X	0.2774385868695619
76	Olfactory tubercle	VI	0.19926747352610233
76	Olfactory tubercle	VIIB	0.20909540047152364
76	Olfactory tubercle	VIIIA	0.20297124711134296
76	Olfactory tubercle	VIIIB	0.23699966346251267
76	Olfactory tubercle	X	0.2493983344105495
77	Olfactory tubercle	amygdala	0.735675587615858
77	Olfactory tubercle	anterior orbital gyrus	0.21500085799140103
77	Olfactory tubercle	CA1 field	0.40288236856973464
77	Olfactory tubercle	CA2 field	0.43552263989619955
77	Olfactory tubercle	CA3 field	0.43833858911729495
77	Olfactory tubercle	CA4 field	0.5080670250635276
77	Olfactory tubercle	caudate nucleus	0.7366462190588744
77	Olfactory tubercle	cerebellar nuclei	0.32854594222231626
77	Olfactory tubercle	cingulate gyrus	0.23599263003018192
77	Olfactory tubercle	claustrum	0.420171639688054
77	Olfactory tubercle	crus I	0.2174045870268636
77	Olfactory tubercle	crus II	0.2111190546185629
77	Olfactory tubercle	cuneus	-0.0015505760340798634
77	Olfactory tubercle	dentate gyrus	0.5671533783538747
77	Olfactory tubercle	epithalamus	0.46549814990899757
77	Olfactory tubercle	frontal operculum	0.22327724821862918
77	Olfactory tubercle	frontal pole	0.1539582639869193
77	Olfactory tubercle	fusiform gyrus	0.3002916052375721
77	Olfactory tubercle	globus pallidus	0.4186753273179364
77	Olfactory tubercle	gyrus rectus	0.2752021207956449
77	Olfactory tubercle	Heschl's gyrus	0.08780150283455469
77	Olfactory tubercle	hypothalamus	0.47373015711224475
77	Olfactory tubercle	III	0.21647115911719314
77	Olfactory tubercle	inferior colliculus	0.332663582879675
77	Olfactory tubercle	inferior frontal gyrus	0.13588710195451772
77	Olfactory tubercle	inferior occipital gyrus	0.052778920885137304
77	Olfactory tubercle	inferior parietal lobule	0.08455933269729309
77	Olfactory tubercle	inferior rostral gyrus	0.2761690943419665
77	Olfactory tubercle	inferior temporal gyrus	0.2319263415437912
77	Olfactory tubercle	insula	0.3067109326295431
77	Olfactory tubercle	IV	0.22213384757774535
77	Olfactory tubercle	IX	0.22948312937223309
77	Olfactory tubercle	lateral orbital gyrus	0.18940622557556075
77	Olfactory tubercle	lingual gyrus	-8.021030583976222e-4
77	Olfactory tubercle	medial orbital gyrus	0.2568176579660449
77	Olfactory tubercle	midbrain tegmentum	0.3806506152606078
77	Olfactory tubercle	middle frontal gyrus	0.097953559153817
77	Olfactory tubercle	middle temporal gyrus	0.18179113633355048
77	Olfactory tubercle	myelencephalon	0.35097345456360324
77	Olfactory tubercle	nucleus accumbens	0.821674864417401
77	Olfactory tubercle	occipital pole	-0.002704806961510391
77	Olfactory tubercle	occipito-temporal gyrus	0.08382837343592359
77	Olfactory tubercle	paracentral lobule, anterior part	0.01674895119995164
77	Olfactory tubercle	paracentral lobule, posterior part	0.03351832409007307
77	Olfactory tubercle	parahippocampal gyrus	0.40486723604565855
77	Olfactory tubercle	paraterminal gyrus	0.5412615271033122
77	Olfactory tubercle	parolfactory gyri	0.4484170784285854
77	Olfactory tubercle	piriform cortex	0.6905676049036469
77	Olfactory tubercle	planum polare	0.29346716177842386
77	Olfactory tubercle	planum temporale	0.07688649849955878
77	Olfactory tubercle	pons	0.30349468231585686
77	Olfactory tubercle	postcentral gyrus	-0.011496123878403831
77	Olfactory tubercle	posterior orbital gyrus	0.2751619372329277
77	Olfactory tubercle	precentral gyrus	-0.01890963723529992
77	Olfactory tubercle	precuneus	0.06324553046090625
77	Olfactory tubercle	pretectal region	0.396257270774981
77	Olfactory tubercle	putamen	0.71377381855006
77	Olfactory tubercle	septal nuclei	0.6639282627260648
77	Olfactory tubercle	subiculum	0.3976273350246511
77	Olfactory tubercle	substantia innominata	0.6809601102777889
77	Olfactory tubercle	subthalamus	0.2962200618969742
77	Olfactory tubercle	superior colliculus	0.3304534373316637
77	Olfactory tubercle	superior frontal gyrus	0.13897879750158446
77	Olfactory tubercle	superior occipital gyrus	0.033329422953267435
77	Olfactory tubercle	superior parietal lobule	0.011505548463696657
77	Olfactory tubercle	superior rostral gyrus	0.2538676989339868
77	Olfactory tubercle	superior temporal gyrus	0.16298010199701296
77	Olfactory tubercle	temporal pole	0.37594833795259347
77	Olfactory tubercle	thalamus	0.2852432994807863
77	Olfactory tubercle	transverse gyri	0.06144968153503272
77	Olfactory tubercle	V	0.20551724828207396
77	Olfactory tubercle	vermal I-II	0.2788941604552515
77	Olfactory tubercle	vermal III	0.24662760785183338
77	Olfactory tubercle	vermal IV	0.23194935026489333
77	Olfactory tubercle	vermal IX	0.23354074720267784
77	Olfactory tubercle	vermal V	0.19880266538331598
77	Olfactory tubercle	vermal VI	0.26057417973205343
77	Olfactory tubercle	vermal VIIAf	0.22690857218224364
77	Olfactory tubercle	vermal VIIAt	0.21107262921833564
77	Olfactory tubercle	vermal VIIB	0.24586892383706554
77	Olfactory tubercle	vermal VIIIA	0.23141233375701195
77	Olfactory tubercle	vermal VIIIB	0.26193013415903477
77	Olfactory tubercle	vermal X	0.2940773557750605
77	Olfactory tubercle	VI	0.20653801061618424
77	Olfactory tubercle	VIIB	0.21632776094420428
77	Olfactory tubercle	VIIIA	0.2085861989066829
77	Olfactory tubercle	VIIIB	0.2446177496204013
77	Olfactory tubercle	X	0.25898982101156687
78	Olfactory tubercle	amygdala	0.738075500505892
78	Olfactory tubercle	anterior orbital gyrus	0.2117484510858569
78	Olfactory tubercle	CA1 field	0.409662118903471
78	Olfactory tubercle	CA2 field	0.44015141815224923
78	Olfactory tubercle	CA3 field	0.44229661933302383
78	Olfactory tubercle	CA4 field	0.5119137355513362
78	Olfactory tubercle	caudate nucleus	0.7193253332657101
78	Olfactory tubercle	cerebellar nuclei	0.34833500577935866
78	Olfactory tubercle	cingulate gyrus	0.23456611429340735
78	Olfactory tubercle	claustrum	0.4143685175512655
78	Olfactory tubercle	crus I	0.24251351116951328
78	Olfactory tubercle	crus II	0.2357603861878209
78	Olfactory tubercle	cuneus	-0.01058820195659476
78	Olfactory tubercle	dentate gyrus	0.5661516249780622
78	Olfactory tubercle	epithalamus	0.48743407044126724
78	Olfactory tubercle	frontal operculum	0.21864005128521974
78	Olfactory tubercle	frontal pole	0.15128854982363873
78	Olfactory tubercle	fusiform gyrus	0.2958914846138923
78	Olfactory tubercle	globus pallidus	0.4355615096503843
78	Olfactory tubercle	gyrus rectus	0.2726712190838163
78	Olfactory tubercle	Heschl's gyrus	0.07913224408929147
78	Olfactory tubercle	hypothalamus	0.4852431190846438
78	Olfactory tubercle	III	0.24185125520571205
78	Olfactory tubercle	inferior colliculus	0.3495617068233901
78	Olfactory tubercle	inferior frontal gyrus	0.1299617010102655
78	Olfactory tubercle	inferior occipital gyrus	0.044859629754926855
78	Olfactory tubercle	inferior parietal lobule	0.07839537510428232
78	Olfactory tubercle	inferior rostral gyrus	0.2738551665635093
78	Olfactory tubercle	inferior temporal gyrus	0.22725640690650267
78	Olfactory tubercle	insula	0.3022984993814535
78	Olfactory tubercle	IV	0.24774953283753745
78	Olfactory tubercle	IX	0.25386603951733233
78	Olfactory tubercle	lateral orbital gyrus	0.18401791865207745
78	Olfactory tubercle	lingual gyrus	-0.010010143469520703
78	Olfactory tubercle	medial orbital gyrus	0.253991411974609
78	Olfactory tubercle	midbrain tegmentum	0.39825712351864095
78	Olfactory tubercle	middle frontal gyrus	0.094624225337053
78	Olfactory tubercle	middle temporal gyrus	0.176152890474312
78	Olfactory tubercle	myelencephalon	0.3723343465510248
78	Olfactory tubercle	nucleus accumbens	0.8082898190212733
78	Olfactory tubercle	occipital pole	-0.012803015856913997
78	Olfactory tubercle	occipito-temporal gyrus	0.07596765003593532
78	Olfactory tubercle	paracentral lobule, anterior part	0.012265073579766462
78	Olfactory tubercle	paracentral lobule, posterior part	0.02834716396641495
78	Olfactory tubercle	parahippocampal gyrus	0.4045702392972039
78	Olfactory tubercle	paraterminal gyrus	0.549271366303777
78	Olfactory tubercle	parolfactory gyri	0.4490675874880273
78	Olfactory tubercle	piriform cortex	0.6905778908969556
78	Olfactory tubercle	planum polare	0.28717537196461496
78	Olfactory tubercle	planum temporale	0.07250324557997403
78	Olfactory tubercle	pons	0.32269854253097263
78	Olfactory tubercle	postcentral gyrus	-0.01817284534045359
78	Olfactory tubercle	posterior orbital gyrus	0.2697155160616801
78	Olfactory tubercle	precentral gyrus	-0.02203232199570573
78	Olfactory tubercle	precuneus	0.057940542201239995
78	Olfactory tubercle	pretectal region	0.4136358287839526
78	Olfactory tubercle	putamen	0.6978178045849138
78	Olfactory tubercle	septal nuclei	0.6707519485464846
78	Olfactory tubercle	subiculum	0.4071788713822999
78	Olfactory tubercle	substantia innominata	0.683752541817997
78	Olfactory tubercle	subthalamus	0.3135056000845854
78	Olfactory tubercle	superior colliculus	0.3451660982379354
78	Olfactory tubercle	superior frontal gyrus	0.13629317142521943
78	Olfactory tubercle	superior occipital gyrus	0.02576432897331221
78	Olfactory tubercle	superior parietal lobule	0.0057324518186218625
78	Olfactory tubercle	superior rostral gyrus	0.251722412188145
78	Olfactory tubercle	superior temporal gyrus	0.15731497179391188
78	Olfactory tubercle	temporal pole	0.3740879083225861
78	Olfactory tubercle	thalamus	0.2977413429782575
78	Olfactory tubercle	transverse gyri	0.05266230592139303
78	Olfactory tubercle	V	0.2303507440070744
78	Olfactory tubercle	vermal I-II	0.305637806681345
78	Olfactory tubercle	vermal III	0.2731250973689771
78	Olfactory tubercle	vermal IV	0.25760323006940516
78	Olfactory tubercle	vermal IX	0.2592768721565198
78	Olfactory tubercle	vermal V	0.22333517306871767
78	Olfactory tubercle	vermal VI	0.2873494394829119
78	Olfactory tubercle	vermal VIIAf	0.25235457252016474
78	Olfactory tubercle	vermal VIIAt	0.23485983877040992
78	Olfactory tubercle	vermal VIIB	0.27114523528022066
78	Olfactory tubercle	vermal VIIIA	0.25658054100567074
78	Olfactory tubercle	vermal VIIIB	0.2884179856874987
78	Olfactory tubercle	vermal X	0.3222157449557746
78	Olfactory tubercle	VI	0.23143404735427453
78	Olfactory tubercle	VIIB	0.24137167701384693
78	Olfactory tubercle	VIIIA	0.23273416552775847
78	Olfactory tubercle	VIIIB	0.2700953671858814
78	Olfactory tubercle	X	0.2873009235557916
79	Olfactory tubercle	amygdala	0.7565495136706064
79	Olfactory tubercle	anterior orbital gyrus	0.1805846291524883
79	Olfactory tubercle	CA1 field	0.40122458314989423
79	Olfactory tubercle	CA2 field	0.444213667208272
79	Olfactory tubercle	CA3 field	0.44853780206680827
79	Olfactory tubercle	CA4 field	0.5306680948083434
79	Olfactory tubercle	caudate nucleus	0.7542361323040445
79	Olfactory tubercle	cerebellar nuclei	0.3227669749855166
79	Olfactory tubercle	cingulate gyrus	0.20290165173226063
79	Olfactory tubercle	claustrum	0.39828146588618363
79	Olfactory tubercle	crus I	0.19267108578700795
79	Olfactory tubercle	crus II	0.18527542714489093
79	Olfactory tubercle	cuneus	-0.02575281400649003
79	Olfactory tubercle	dentate gyrus	0.5669647487878244
79	Olfactory tubercle	epithalamus	0.4680806222917989
79	Olfactory tubercle	frontal operculum	0.1911239554438854
79	Olfactory tubercle	frontal pole	0.11801207077663199
79	Olfactory tubercle	fusiform gyrus	0.2772207386784043
79	Olfactory tubercle	globus pallidus	0.4165112698118201
79	Olfactory tubercle	gyrus rectus	0.2471050129069959
79	Olfactory tubercle	Heschl's gyrus	0.058523780263855504
79	Olfactory tubercle	hypothalamus	0.4927618356413161
79	Olfactory tubercle	III	0.19508975773633558
79	Olfactory tubercle	inferior colliculus	0.32862537335272074
79	Olfactory tubercle	inferior frontal gyrus	0.10102733053902295
79	Olfactory tubercle	inferior occipital gyrus	0.020962645645874838
79	Olfactory tubercle	inferior parietal lobule	0.05081045329454354
79	Olfactory tubercle	inferior rostral gyrus	0.2513251718373658
79	Olfactory tubercle	inferior temporal gyrus	0.20394535800826363
79	Olfactory tubercle	insula	0.2833595356401637
79	Olfactory tubercle	IV	0.1988304072985356
79	Olfactory tubercle	IX	0.2026799184457587
79	Olfactory tubercle	lateral orbital gyrus	0.15748031003120763
79	Olfactory tubercle	lingual gyrus	-0.02444049463040026
79	Olfactory tubercle	medial orbital gyrus	0.22652590821551494
79	Olfactory tubercle	midbrain tegmentum	0.3866905247628351
79	Olfactory tubercle	middle frontal gyrus	0.05988931456363001
79	Olfactory tubercle	middle temporal gyrus	0.1494490809920694
79	Olfactory tubercle	myelencephalon	0.34838034612270086
79	Olfactory tubercle	nucleus accumbens	0.8424113686067158
79	Olfactory tubercle	occipital pole	-0.024806627317017577
79	Olfactory tubercle	occipito-temporal gyrus	0.05083008787231448
79	Olfactory tubercle	paracentral lobule, anterior part	-0.027032948017210234
79	Olfactory tubercle	paracentral lobule, posterior part	0.0015305533011655784
79	Olfactory tubercle	parahippocampal gyrus	0.3955766926951853
79	Olfactory tubercle	paraterminal gyrus	0.5374724743306188
79	Olfactory tubercle	parolfactory gyri	0.430327743399294
79	Olfactory tubercle	piriform cortex	0.705529784250604
79	Olfactory tubercle	planum polare	0.2671723898349033
79	Olfactory tubercle	planum temporale	0.04486463756150848
79	Olfactory tubercle	pons	0.3040537070300747
79	Olfactory tubercle	postcentral gyrus	-0.046577951886790994
79	Olfactory tubercle	posterior orbital gyrus	0.24329113397435598
79	Olfactory tubercle	precentral gyrus	-0.06338940363255793
79	Olfactory tubercle	precuneus	0.02727106253564969
79	Olfactory tubercle	pretectal region	0.3977626543558395
79	Olfactory tubercle	putamen	0.7289551010156947
79	Olfactory tubercle	septal nuclei	0.682927321083051
79	Olfactory tubercle	subiculum	0.3926034427307487
79	Olfactory tubercle	substantia innominata	0.7016179394524718
79	Olfactory tubercle	subthalamus	0.29762160820489614
79	Olfactory tubercle	superior colliculus	0.33336335779352144
79	Olfactory tubercle	superior frontal gyrus	0.10142387233231814
79	Olfactory tubercle	superior occipital gyrus	7.648835968346187e-4
79	Olfactory tubercle	superior parietal lobule	-0.024256957029029264
79	Olfactory tubercle	superior rostral gyrus	0.22234094025533382
79	Olfactory tubercle	superior temporal gyrus	0.1288778152629493
79	Olfactory tubercle	temporal pole	0.3597664011611879
79	Olfactory tubercle	thalamus	0.2919230616997009
79	Olfactory tubercle	transverse gyri	0.030697232713994285
79	Olfactory tubercle	V	0.18145510936425188
79	Olfactory tubercle	vermal I-II	0.2617170712878429
79	Olfactory tubercle	vermal III	0.22298812643980706
79	Olfactory tubercle	vermal IV	0.20825669034552602
79	Olfactory tubercle	vermal IX	0.20985678825545218
79	Olfactory tubercle	vermal V	0.17403157427289037
79	Olfactory tubercle	vermal VI	0.23813866523648033
79	Olfactory tubercle	vermal VIIAf	0.20200197317784743
79	Olfactory tubercle	vermal VIIAt	0.185492949379947
79	Olfactory tubercle	vermal VIIB	0.2220428820202751
79	Olfactory tubercle	vermal VIIIA	0.20613726943018548
79	Olfactory tubercle	vermal VIIIB	0.23904900088109077
79	Olfactory tubercle	vermal X	0.27803115071521906
79	Olfactory tubercle	VI	0.1825885240463097
79	Olfactory tubercle	VIIB	0.19112545809339562
79	Olfactory tubercle	VIIIA	0.18244619988285746
79	Olfactory tubercle	VIIIB	0.22137917046958508
79	Olfactory tubercle	X	0.23487412083243261
80	Olfactory tubercle	amygdala	0.7369289319750837
80	Olfactory tubercle	anterior orbital gyrus	0.19045857894958898
80	Olfactory tubercle	CA1 field	0.3849698945998109
80	Olfactory tubercle	CA2 field	0.42532367886666367
80	Olfactory tubercle	CA3 field	0.43066382151592436
80	Olfactory tubercle	CA4 field	0.5104070957000518
80	Olfactory tubercle	caudate nucleus	0.7670140324951001
80	Olfactory tubercle	cerebellar nuclei	0.3119573025835233
80	Olfactory tubercle	cingulate gyrus	0.21050123247001348
80	Olfactory tubercle	claustrum	0.39990894521312026
80	Olfactory tubercle	crus I	0.18443393842241573
80	Olfactory tubercle	crus II	0.1778824508850475
80	Olfactory tubercle	cuneus	0.0022307281840558465
80	Olfactory tubercle	dentate gyrus	0.5610623975579846
80	Olfactory tubercle	epithalamus	0.45028964333164817
80	Olfactory tubercle	frontal operculum	0.20107188856906502
80	Olfactory tubercle	frontal pole	0.12988962797093587
80	Olfactory tubercle	fusiform gyrus	0.28169570381786274
80	Olfactory tubercle	globus pallidus	0.4072542449716069
80	Olfactory tubercle	gyrus rectus	0.2511464559703332
80	Olfactory tubercle	Heschl's gyrus	0.08232159713909422
80	Olfactory tubercle	hypothalamus	0.4753843580380513
80	Olfactory tubercle	III	0.18556160292025298
80	Olfactory tubercle	inferior colliculus	0.3194069325787443
80	Olfactory tubercle	inferior frontal gyrus	0.11829877334371361
80	Olfactory tubercle	inferior occipital gyrus	0.045697882269879385
80	Olfactory tubercle	inferior parietal lobule	0.0703165030184056
80	Olfactory tubercle	inferior rostral gyrus	0.25453150300823646
80	Olfactory tubercle	inferior temporal gyrus	0.2128685054869664
80	Olfactory tubercle	insula	0.2887568633518435
80	Olfactory tubercle	IV	0.18962697146433963
80	Olfactory tubercle	IX	0.19589626755862183
80	Olfactory tubercle	lateral orbital gyrus	0.1720829465703157
80	Olfactory tubercle	lingual gyrus	0.0033888165285783822
80	Olfactory tubercle	medial orbital gyrus	0.2327429451512941
80	Olfactory tubercle	midbrain tegmentum	0.3715173344376831
80	Olfactory tubercle	middle frontal gyrus	0.07544430258249006
80	Olfactory tubercle	middle temporal gyrus	0.1636494655224485
80	Olfactory tubercle	myelencephalon	0.3343182413480624
80	Olfactory tubercle	nucleus accumbens	0.8462687010749381
80	Olfactory tubercle	occipital pole	0.003935730945814846
80	Olfactory tubercle	occipito-temporal gyrus	0.0734520473944575
80	Olfactory tubercle	paracentral lobule, anterior part	-0.004121100120782354
80	Olfactory tubercle	paracentral lobule, posterior part	0.021548532423689214
80	Olfactory tubercle	parahippocampal gyrus	0.38813271834240043
80	Olfactory tubercle	paraterminal gyrus	0.5199609340103638
80	Olfactory tubercle	parolfactory gyri	0.4224318860818294
80	Olfactory tubercle	piriform cortex	0.6866167282470668
80	Olfactory tubercle	planum polare	0.2768697024575865
80	Olfactory tubercle	planum temporale	0.06317339793399329
80	Olfactory tubercle	pons	0.29057948267693673
80	Olfactory tubercle	postcentral gyrus	-0.020535393123372134
80	Olfactory tubercle	posterior orbital gyrus	0.2541857589052926
80	Olfactory tubercle	precentral gyrus	-0.04087905319705317
80	Olfactory tubercle	precuneus	0.047795656611450035
80	Olfactory tubercle	pretectal region	0.38507484301047185
80	Olfactory tubercle	putamen	0.7425756360928409
80	Olfactory tubercle	septal nuclei	0.6691079825886944
80	Olfactory tubercle	subiculum	0.37288999775589876
80	Olfactory tubercle	substantia innominata	0.6912326562414487
80	Olfactory tubercle	subthalamus	0.286387286943694
80	Olfactory tubercle	superior colliculus	0.32258966300494263
80	Olfactory tubercle	superior frontal gyrus	0.1141491995944241
80	Olfactory tubercle	superior occipital gyrus	0.02579141880688412
80	Olfactory tubercle	superior parietal lobule	-0.0013493110022395245
80	Olfactory tubercle	superior rostral gyrus	0.2287015082909823
80	Olfactory tubercle	superior temporal gyrus	0.1443407334146956
80	Olfactory tubercle	temporal pole	0.3558224429757993
80	Olfactory tubercle	thalamus	0.2839185490128825
80	Olfactory tubercle	transverse gyri	0.05539534316307296
80	Olfactory tubercle	V	0.17336650736764156
80	Olfactory tubercle	vermal I-II	0.24978959644411808
80	Olfactory tubercle	vermal III	0.2132327855414875
80	Olfactory tubercle	vermal IV	0.19930106705308748
80	Olfactory tubercle	vermal IX	0.20074813894560245
80	Olfactory tubercle	vermal V	0.16689436773378405
80	Olfactory tubercle	vermal VI	0.22733286413152476
80	Olfactory tubercle	vermal VIIAf	0.19375653472642218
80	Olfactory tubercle	vermal VIIAt	0.17854529539152564
80	Olfactory tubercle	vermal VIIB	0.21378820331313958
80	Olfactory tubercle	vermal VIIIA	0.19790745643277596
80	Olfactory tubercle	vermal VIIIB	0.22895178763748888
80	Olfactory tubercle	vermal X	0.2629929937398573
80	Olfactory tubercle	VI	0.1743495884230737
80	Olfactory tubercle	VIIB	0.18311306854908888
80	Olfactory tubercle	VIIIA	0.17533748282436404
80	Olfactory tubercle	VIIIB	0.21202652477754613
80	Olfactory tubercle	X	0.22295117608998336
81	Olfactory tubercle	amygdala	0.7133010015110531
81	Olfactory tubercle	anterior orbital gyrus	0.20240582822989564
81	Olfactory tubercle	CA1 field	0.36719307606226437
81	Olfactory tubercle	CA2 field	0.40558358922751353
81	Olfactory tubercle	CA3 field	0.41114011110423715
81	Olfactory tubercle	CA4 field	0.48825851760280636
81	Olfactory tubercle	caudate nucleus	0.7651954909280716
81	Olfactory tubercle	cerebellar nuclei	0.30469672000382625
81	Olfactory tubercle	cingulate gyrus	0.21992664962705075
81	Olfactory tubercle	claustrum	0.4061564855016209
81	Olfactory tubercle	crus I	0.18818440632854858
81	Olfactory tubercle	crus II	0.18285063156671036
81	Olfactory tubercle	cuneus	0.02535569628187786
81	Olfactory tubercle	dentate gyrus	0.5499827291772109
81	Olfactory tubercle	epithalamus	0.43501358747619595
81	Olfactory tubercle	frontal operculum	0.21394360807839288
81	Olfactory tubercle	frontal pole	0.14456245141606197
81	Olfactory tubercle	fusiform gyrus	0.28836924016863147
81	Olfactory tubercle	globus pallidus	0.4000290300924758
81	Olfactory tubercle	gyrus rectus	0.25814888701036576
81	Olfactory tubercle	Heschl's gyrus	0.10376330860058214
81	Olfactory tubercle	hypothalamus	0.45389365275752463
81	Olfactory tubercle	III	0.18551384779109184
81	Olfactory tubercle	inferior colliculus	0.30663993493866476
81	Olfactory tubercle	inferior frontal gyrus	0.13636819837131867
81	Olfactory tubercle	inferior occipital gyrus	0.0682312113835494
81	Olfactory tubercle	inferior parietal lobule	0.08924332852080404
81	Olfactory tubercle	inferior rostral gyrus	0.26042162321933304
81	Olfactory tubercle	inferior temporal gyrus	0.2239721305106236
81	Olfactory tubercle	insula	0.296003769382479
81	Olfactory tubercle	IV	0.19203299450202208
81	Olfactory tubercle	IX	0.2025127123646416
81	Olfactory tubercle	lateral orbital gyrus	0.18808557304617482
81	Olfactory tubercle	lingual gyrus	0.027026456435688583
81	Olfactory tubercle	medial orbital gyrus	0.24163515324422444
81	Olfactory tubercle	midbrain tegmentum	0.35748285966895293
81	Olfactory tubercle	middle frontal gyrus	0.09180542806559369
81	Olfactory tubercle	middle temporal gyrus	0.17935951268028857
81	Olfactory tubercle	myelencephalon	0.3255956617391525
81	Olfactory tubercle	nucleus accumbens	0.8366589219805031
81	Olfactory tubercle	occipital pole	0.027771192461923264
81	Olfactory tubercle	occipito-temporal gyrus	0.09505156872970552
81	Olfactory tubercle	paracentral lobule, anterior part	0.018272907116926043
81	Olfactory tubercle	paracentral lobule, posterior part	0.03978872428484302
81	Olfactory tubercle	parahippocampal gyrus	0.3831422928808727
81	Olfactory tubercle	paraterminal gyrus	0.49889087787330266
81	Olfactory tubercle	parolfactory gyri	0.4163805980894384
81	Olfactory tubercle	piriform cortex	0.668723336849325
81	Olfactory tubercle	planum polare	0.28779840084297936
81	Olfactory tubercle	planum temporale	0.08003983780719054
81	Olfactory tubercle	pons	0.28095414791564316
81	Olfactory tubercle	postcentral gyrus	0.002853832075701187
81	Olfactory tubercle	posterior orbital gyrus	0.26783730893649826
81	Olfactory tubercle	precentral gyrus	-0.018577819452629558
81	Olfactory tubercle	precuneus	0.06772544168067882
81	Olfactory tubercle	pretectal region	0.3707350058935069
81	Olfactory tubercle	putamen	0.742050780557754
81	Olfactory tubercle	septal nuclei	0.6469343311737044
81	Olfactory tubercle	subiculum	0.3515531021255132
81	Olfactory tubercle	substantia innominata	0.6735082152660679
81	Olfactory tubercle	subthalamus	0.27628675803703645
81	Olfactory tubercle	superior colliculus	0.30604555099459163
81	Olfactory tubercle	superior frontal gyrus	0.12837730620597543
81	Olfactory tubercle	superior occipital gyrus	0.04789241230538731
81	Olfactory tubercle	superior parietal lobule	0.020054027852259508
81	Olfactory tubercle	superior rostral gyrus	0.23654461619728248
81	Olfactory tubercle	superior temporal gyrus	0.1606951470665109
81	Olfactory tubercle	temporal pole	0.35506207745797286
81	Olfactory tubercle	thalamus	0.26993890576518786
81	Olfactory tubercle	transverse gyri	0.0778201243496871
81	Olfactory tubercle	V	0.17690422165953246
81	Olfactory tubercle	vermal I-II	0.24611589640819564
81	Olfactory tubercle	vermal III	0.2144373558277355
81	Olfactory tubercle	vermal IV	0.2013336926983721
81	Olfactory tubercle	vermal IX	0.20214909183317178
81	Olfactory tubercle	vermal V	0.1709445489077077
81	Olfactory tubercle	vermal VI	0.22855061680957064
81	Olfactory tubercle	vermal VIIAf	0.19768951188691003
81	Olfactory tubercle	vermal VIIAt	0.18310951509916634
81	Olfactory tubercle	vermal VIIB	0.2163588392268302
81	Olfactory tubercle	vermal VIIIA	0.20120726109233214
81	Olfactory tubercle	vermal VIIIB	0.229068309756838
81	Olfactory tubercle	vermal X	0.25620182043504525
81	Olfactory tubercle	VI	0.17767554646391862
81	Olfactory tubercle	VIIB	0.18692763880865496
81	Olfactory tubercle	VIIIA	0.18063234865202266
81	Olfactory tubercle	VIIIB	0.21463298838865474
81	Olfactory tubercle	X	0.2235629888369941
82	Olfactory tubercle	amygdala	0.7017442662308602
82	Olfactory tubercle	anterior orbital gyrus	0.21321719048176135
82	Olfactory tubercle	CA1 field	0.36082326395538283
82	Olfactory tubercle	CA2 field	0.39529326845336094
82	Olfactory tubercle	CA3 field	0.39826054556088053
82	Olfactory tubercle	CA4 field	0.47473133930336614
82	Olfactory tubercle	caudate nucleus	0.7522810431574793
82	Olfactory tubercle	cerebellar nuclei	0.30136463648280937
82	Olfactory tubercle	cingulate gyrus	0.22966241559971465
82	Olfactory tubercle	claustrum	0.42286127297639753
82	Olfactory tubercle	crus I	0.19438555467484608
82	Olfactory tubercle	crus II	0.19001438518534708
82	Olfactory tubercle	cuneus	0.025611745349573514
82	Olfactory tubercle	dentate gyrus	0.5407692416421637
82	Olfactory tubercle	epithalamus	0.4244390972687529
82	Olfactory tubercle	frontal operculum	0.22712056281284276
82	Olfactory tubercle	frontal pole	0.1568414257286917
82	Olfactory tubercle	fusiform gyrus	0.2994160705623107
82	Olfactory tubercle	globus pallidus	0.39674588073925793
82	Olfactory tubercle	gyrus rectus	0.27068567704655166
82	Olfactory tubercle	Heschl's gyrus	0.10960672243518743
82	Olfactory tubercle	hypothalamus	0.4338321775281802
82	Olfactory tubercle	III	0.1892238492718371
82	Olfactory tubercle	inferior colliculus	0.2964645203987178
82	Olfactory tubercle	inferior frontal gyrus	0.14574818964408776
82	Olfactory tubercle	inferior occipital gyrus	0.07277855859350911
82	Olfactory tubercle	inferior parietal lobule	0.0962542078651316
82	Olfactory tubercle	inferior rostral gyrus	0.2714295144947358
82	Olfactory tubercle	inferior temporal gyrus	0.23563484792451628
82	Olfactory tubercle	insula	0.3072652323439618
82	Olfactory tubercle	IV	0.19823468522343124
82	Olfactory tubercle	IX	0.21187011938652942
82	Olfactory tubercle	lateral orbital gyrus	0.19929968954825228
82	Olfactory tubercle	lingual gyrus	0.028829873421503043
82	Olfactory tubercle	medial orbital gyrus	0.25350917300552983
82	Olfactory tubercle	midbrain tegmentum	0.3464174965818159
82	Olfactory tubercle	middle frontal gyrus	0.09969684403704582
82	Olfactory tubercle	middle temporal gyrus	0.1902663399317559
82	Olfactory tubercle	myelencephalon	0.32066678661911385
82	Olfactory tubercle	nucleus accumbens	0.8213124789117201
82	Olfactory tubercle	occipital pole	0.028730200779510714
82	Olfactory tubercle	occipito-temporal gyrus	0.10196171243757408
82	Olfactory tubercle	paracentral lobule, anterior part	0.023455471762586777
82	Olfactory tubercle	paracentral lobule, posterior part	0.04287041364668464
82	Olfactory tubercle	parahippocampal gyrus	0.3923325626325155
82	Olfactory tubercle	paraterminal gyrus	0.4909485566467739
82	Olfactory tubercle	parolfactory gyri	0.4226672262086248
82	Olfactory tubercle	piriform cortex	0.6716358009901916
82	Olfactory tubercle	planum polare	0.2985566470482502
82	Olfactory tubercle	planum temporale	0.0857735992669572
82	Olfactory tubercle	pons	0.2747496933542284
82	Olfactory tubercle	postcentral gyrus	0.0056205435514069665
82	Olfactory tubercle	posterior orbital gyrus	0.2807194010440458
82	Olfactory tubercle	precentral gyrus	-0.013895162351652592
82	Olfactory tubercle	precuneus	0.07420064722321297
82	Olfactory tubercle	pretectal region	0.35878897267132687
82	Olfactory tubercle	putamen	0.7295124899495772
82	Olfactory tubercle	septal nuclei	0.6240678673844635
82	Olfactory tubercle	subiculum	0.3442421947447797
82	Olfactory tubercle	substantia innominata	0.6546508809782903
82	Olfactory tubercle	subthalamus	0.26926136601716
82	Olfactory tubercle	superior colliculus	0.2907254256601175
82	Olfactory tubercle	superior frontal gyrus	0.13733582309920025
82	Olfactory tubercle	superior occipital gyrus	0.05119633766096627
82	Olfactory tubercle	superior parietal lobule	0.024621193468051257
82	Olfactory tubercle	superior rostral gyrus	0.24590305142278243
82	Olfactory tubercle	superior temporal gyrus	0.17020052320949514
82	Olfactory tubercle	temporal pole	0.36629347257495565
82	Olfactory tubercle	thalamus	0.2565807104603565
82	Olfactory tubercle	transverse gyri	0.0833050698505402
82	Olfactory tubercle	V	0.1831315530909247
82	Olfactory tubercle	vermal I-II	0.24615824613772133
82	Olfactory tubercle	vermal III	0.21909503993654786
82	Olfactory tubercle	vermal IV	0.2061700269606978
82	Olfactory tubercle	vermal IX	0.20556100432406219
82	Olfactory tubercle	vermal V	0.1770124704491912
82	Olfactory tubercle	vermal VI	0.23364474541395247
82	Olfactory tubercle	vermal VIIAf	0.2042631611041441
82	Olfactory tubercle	vermal VIIAt	0.18984740052069896
82	Olfactory tubercle	vermal VIIB	0.220657600103514
82	Olfactory tubercle	vermal VIIIA	0.20715293839555834
82	Olfactory tubercle	vermal VIIIB	0.232100396681077
82	Olfactory tubercle	vermal X	0.2539263623062561
82	Olfactory tubercle	VI	0.183497290583526
82	Olfactory tubercle	VIIB	0.19317105992485603
82	Olfactory tubercle	VIIIA	0.18807595423741075
82	Olfactory tubercle	VIIIB	0.22049293263855974
82	Olfactory tubercle	X	0.22892149043499652
83	Olfactory tubercle	amygdala	0.6829885930536957
83	Olfactory tubercle	anterior orbital gyrus	0.26629003515488053
83	Olfactory tubercle	CA1 field	0.37323279416394295
83	Olfactory tubercle	CA2 field	0.4060228119319414
83	Olfactory tubercle	CA3 field	0.4044090843251369
83	Olfactory tubercle	CA4 field	0.4683704908286727
83	Olfactory tubercle	caudate nucleus	0.7216292278224302
83	Olfactory tubercle	cerebellar nuclei	0.29178378513406067
83	Olfactory tubercle	cingulate gyrus	0.2800491080424023
83	Olfactory tubercle	claustrum	0.4823072544470845
83	Olfactory tubercle	crus I	0.19904893987077724
83	Olfactory tubercle	crus II	0.19676259231731283
83	Olfactory tubercle	cuneus	0.04128186684978571
83	Olfactory tubercle	dentate gyrus	0.5480402020318852
83	Olfactory tubercle	epithalamus	0.39736489356138915
83	Olfactory tubercle	frontal operculum	0.28529516030354896
83	Olfactory tubercle	frontal pole	0.20853157242789339
83	Olfactory tubercle	fusiform gyrus	0.3526049023867585
83	Olfactory tubercle	globus pallidus	0.38516310471043447
83	Olfactory tubercle	gyrus rectus	0.32578703465839814
83	Olfactory tubercle	Heschl's gyrus	0.1434511634513479
83	Olfactory tubercle	hypothalamus	0.39594178677644964
83	Olfactory tubercle	III	0.18948526804223711
83	Olfactory tubercle	inferior colliculus	0.2724592173236461
83	Olfactory tubercle	inferior frontal gyrus	0.19572624826646826
83	Olfactory tubercle	inferior occipital gyrus	0.10540808427644068
83	Olfactory tubercle	inferior parietal lobule	0.1388229281464069
83	Olfactory tubercle	inferior rostral gyrus	0.32367609367557265
83	Olfactory tubercle	inferior temporal gyrus	0.2889978317676447
83	Olfactory tubercle	insula	0.3587618663718399
83	Olfactory tubercle	IV	0.2027392029459119
83	Olfactory tubercle	IX	0.22161859148488908
83	Olfactory tubercle	lateral orbital gyrus	0.24716268827294238
83	Olfactory tubercle	lingual gyrus	0.04528835338711234
83	Olfactory tubercle	medial orbital gyrus	0.30816106296092916
83	Olfactory tubercle	midbrain tegmentum	0.3245219026768594
83	Olfactory tubercle	middle frontal gyrus	0.14925226597621094
83	Olfactory tubercle	middle temporal gyrus	0.24184152002633397
83	Olfactory tubercle	myelencephalon	0.30791481491906597
83	Olfactory tubercle	nucleus accumbens	0.7876745133727674
83	Olfactory tubercle	occipital pole	0.04619567000920619
83	Olfactory tubercle	occipito-temporal gyrus	0.1418161426089049
83	Olfactory tubercle	paracentral lobule, anterior part	0.0673324883816982
83	Olfactory tubercle	paracentral lobule, posterior part	0.07787550522743558
83	Olfactory tubercle	parahippocampal gyrus	0.43260684663906096
83	Olfactory tubercle	paraterminal gyrus	0.491485985180414
83	Olfactory tubercle	parolfactory gyri	0.46631957845575467
83	Olfactory tubercle	piriform cortex	0.6785362914420773
83	Olfactory tubercle	planum polare	0.3503806177207466
83	Olfactory tubercle	planum temporale	0.12095888018201073
83	Olfactory tubercle	pons	0.2617958478879913
83	Olfactory tubercle	postcentral gyrus	0.03597873161012106
83	Olfactory tubercle	posterior orbital gyrus	0.33666053722378386
83	Olfactory tubercle	precentral gyrus	0.02885423474366196
83	Olfactory tubercle	precuneus	0.11422543803329148
83	Olfactory tubercle	pretectal region	0.3338082319973208
83	Olfactory tubercle	putamen	0.6986454639589302
83	Olfactory tubercle	septal nuclei	0.5769894686000995
83	Olfactory tubercle	subiculum	0.3560737557494528
83	Olfactory tubercle	substantia innominata	0.618891216017617
83	Olfactory tubercle	subthalamus	0.25464639802111616
83	Olfactory tubercle	superior colliculus	0.2617076895778533
83	Olfactory tubercle	superior frontal gyrus	0.19011882750619685
83	Olfactory tubercle	superior occipital gyrus	0.08103233148120162
83	Olfactory tubercle	superior parietal lobule	0.06018757007998655
83	Olfactory tubercle	superior rostral gyrus	0.2974919940244784
83	Olfactory tubercle	superior temporal gyrus	0.22060288868400216
83	Olfactory tubercle	temporal pole	0.4167415097515651
83	Olfactory tubercle	thalamus	0.23242289879244885
83	Olfactory tubercle	transverse gyri	0.1163768265224792
83	Olfactory tubercle	V	0.18816021855021398
83	Olfactory tubercle	vermal I-II	0.23836240891528568
83	Olfactory tubercle	vermal III	0.219915490963977
83	Olfactory tubercle	vermal IV	0.20770685173276057
83	Olfactory tubercle	vermal IX	0.20599047370229712
83	Olfactory tubercle	vermal V	0.18145287346279784
83	Olfactory tubercle	vermal VI	0.23502422932145636
83	Olfactory tubercle	vermal VIIAf	0.20811269595135581
83	Olfactory tubercle	vermal VIIAt	0.1958680234969279
83	Olfactory tubercle	vermal VIIB	0.22187928905005597
83	Olfactory tubercle	vermal VIIIA	0.2106590103150315
83	Olfactory tubercle	vermal VIIIB	0.2298439526218841
83	Olfactory tubercle	vermal X	0.24250576456897566
83	Olfactory tubercle	VI	0.1877489839581399
83	Olfactory tubercle	VIIB	0.19816200427459657
83	Olfactory tubercle	VIIIA	0.19548340331326727
83	Olfactory tubercle	VIIIB	0.2242825641389919
83	Olfactory tubercle	X	0.23163437347911345
84	Olfactory tubercle	amygdala	0.7068394976701712
84	Olfactory tubercle	anterior orbital gyrus	0.24277420138806205
84	Olfactory tubercle	CA1 field	0.38716810541221525
84	Olfactory tubercle	CA2 field	0.42370980107727846
84	Olfactory tubercle	CA3 field	0.4227455528493468
84	Olfactory tubercle	CA4 field	0.488103748051322
84	Olfactory tubercle	caudate nucleus	0.7245838106639565
84	Olfactory tubercle	cerebellar nuclei	0.30173230848948496
84	Olfactory tubercle	cingulate gyrus	0.2591437705020623
84	Olfactory tubercle	claustrum	0.4622360559048487
84	Olfactory tubercle	crus I	0.19969151621571374
84	Olfactory tubercle	crus II	0.19648802105959018
84	Olfactory tubercle	cuneus	0.01043836329619966
84	Olfactory tubercle	dentate gyrus	0.5570908392016338
84	Olfactory tubercle	epithalamus	0.417423186912323
84	Olfactory tubercle	frontal operculum	0.2595582678482596
84	Olfactory tubercle	frontal pole	0.1812373297616703
84	Olfactory tubercle	fusiform gyrus	0.3323875165991625
84	Olfactory tubercle	globus pallidus	0.3942036642581476
84	Olfactory tubercle	gyrus rectus	0.30579389523876094
84	Olfactory tubercle	Heschl's gyrus	0.11140007562055665
84	Olfactory tubercle	hypothalamus	0.4234662233609309
84	Olfactory tubercle	III	0.19163738778347675
84	Olfactory tubercle	inferior colliculus	0.2859421392418875
84	Olfactory tubercle	inferior frontal gyrus	0.16648164354172473
84	Olfactory tubercle	inferior occipital gyrus	0.073842452275307
84	Olfactory tubercle	inferior parietal lobule	0.10931308710798429
84	Olfactory tubercle	inferior rostral gyrus	0.3043778425361785
84	Olfactory tubercle	inferior temporal gyrus	0.26429627811930323
84	Olfactory tubercle	insula	0.337951001343935
84	Olfactory tubercle	IV	0.20340730046997055
84	Olfactory tubercle	IX	0.21974094815889636
84	Olfactory tubercle	lateral orbital gyrus	0.21886070184091785
84	Olfactory tubercle	lingual gyrus	0.013025193293950103
84	Olfactory tubercle	medial orbital gyrus	0.2868161555766579
84	Olfactory tubercle	midbrain tegmentum	0.3427712938950639
84	Olfactory tubercle	middle frontal gyrus	0.12271898584889082
84	Olfactory tubercle	middle temporal gyrus	0.21379288465162904
84	Olfactory tubercle	myelencephalon	0.3215497782170066
84	Olfactory tubercle	nucleus accumbens	0.8008549735016378
84	Olfactory tubercle	occipital pole	0.013656643581521525
84	Olfactory tubercle	occipito-temporal gyrus	0.11001843857111226
84	Olfactory tubercle	paracentral lobule, anterior part	0.03850006084345143
84	Olfactory tubercle	paracentral lobule, posterior part	0.05039029289995784
84	Olfactory tubercle	parahippocampal gyrus	0.423796832056222
84	Olfactory tubercle	paraterminal gyrus	0.5093920952258786
84	Olfactory tubercle	parolfactory gyri	0.4638933834749432
84	Olfactory tubercle	piriform cortex	0.6903165780037727
84	Olfactory tubercle	planum polare	0.32681092818944485
84	Olfactory tubercle	planum temporale	0.09325563591697318
84	Olfactory tubercle	pons	0.27502325755229773
84	Olfactory tubercle	postcentral gyrus	0.005656400161455564
84	Olfactory tubercle	posterior orbital gyrus	0.3107451962036056
84	Olfactory tubercle	precentral gyrus	5.334177968976397e-4
84	Olfactory tubercle	precuneus	0.0846928427248364
84	Olfactory tubercle	pretectal region	0.3518308593783472
84	Olfactory tubercle	putamen	0.7010668904655222
84	Olfactory tubercle	septal nuclei	0.6073784675405843
84	Olfactory tubercle	subiculum	0.37471895080788187
84	Olfactory tubercle	substantia innominata	0.6432853104172714
84	Olfactory tubercle	subthalamus	0.26650648685938283
84	Olfactory tubercle	superior colliculus	0.27974510435293026
84	Olfactory tubercle	superior frontal gyrus	0.16516589190729306
84	Olfactory tubercle	superior occipital gyrus	0.05072718870684277
84	Olfactory tubercle	superior parietal lobule	0.030087637611784214
84	Olfactory tubercle	superior rostral gyrus	0.2783514407425037
84	Olfactory tubercle	superior temporal gyrus	0.1928300154036725
84	Olfactory tubercle	temporal pole	0.4043648793692552
84	Olfactory tubercle	thalamus	0.2437103625079418
84	Olfactory tubercle	transverse gyri	0.08378267725087041
84	Olfactory tubercle	V	0.18819210660825406
84	Olfactory tubercle	vermal I-II	0.24458372403113748
84	Olfactory tubercle	vermal III	0.2223784543318472
84	Olfactory tubercle	vermal IV	0.2097040837059642
84	Olfactory tubercle	vermal IX	0.20969995914959863
84	Olfactory tubercle	vermal V	0.18125009480239768
84	Olfactory tubercle	vermal VI	0.23809418957299497
84	Olfactory tubercle	vermal VIIAf	0.20851227878973944
84	Olfactory tubercle	vermal VIIAt	0.19556171119148819
84	Olfactory tubercle	vermal VIIB	0.22384988138591236
84	Olfactory tubercle	vermal VIIIA	0.2118041619515019
84	Olfactory tubercle	vermal VIIIB	0.23433455563739394
84	Olfactory tubercle	vermal X	0.2532461048251444
84	Olfactory tubercle	VI	0.1883239543852025
84	Olfactory tubercle	VIIB	0.19891030025930986
84	Olfactory tubercle	VIIIA	0.19490546278715593
84	Olfactory tubercle	VIIIB	0.22608252832446452
84	Olfactory tubercle	X	0.2357297601105321
85	Olfactory tubercle	amygdala	0.7313210080969413
85	Olfactory tubercle	anterior orbital gyrus	0.23202661674372635
85	Olfactory tubercle	CA1 field	0.40497559750851075
85	Olfactory tubercle	CA2 field	0.4416435720891429
85	Olfactory tubercle	CA3 field	0.43989245484096
85	Olfactory tubercle	CA4 field	0.5075361289935477
85	Olfactory tubercle	caudate nucleus	0.7183979029814439
85	Olfactory tubercle	cerebellar nuclei	0.3076236305640135
85	Olfactory tubercle	cingulate gyrus	0.2512931526317729
85	Olfactory tubercle	claustrum	0.45592831027151526
85	Olfactory tubercle	crus I	0.20251881936526472
85	Olfactory tubercle	crus II	0.19838140105261742
85	Olfactory tubercle	cuneus	-0.014608393668536815
85	Olfactory tubercle	dentate gyrus	0.5651464243294185
85	Olfactory tubercle	epithalamus	0.43231991331796016
85	Olfactory tubercle	frontal operculum	0.24773173697117573
85	Olfactory tubercle	frontal pole	0.16845531316820997
85	Olfactory tubercle	fusiform gyrus	0.326212714888578
85	Olfactory tubercle	globus pallidus	0.3985488665407733
85	Olfactory tubercle	gyrus rectus	0.30025710423857643
85	Olfactory tubercle	Heschl's gyrus	0.08897295042405913
85	Olfactory tubercle	hypothalamus	0.4439205016227217
85	Olfactory tubercle	III	0.19604987837900303
85	Olfactory tubercle	inferior colliculus	0.2940164338248822
85	Olfactory tubercle	inferior frontal gyrus	0.14880826486816098
85	Olfactory tubercle	inferior occipital gyrus	0.050450401557421656
85	Olfactory tubercle	inferior parietal lobule	0.0903923596250719
85	Olfactory tubercle	inferior rostral gyrus	0.30019577246274576
85	Olfactory tubercle	inferior temporal gyrus	0.2539467124498331
85	Olfactory tubercle	insula	0.33155430309262757
85	Olfactory tubercle	IV	0.20675139097738102
85	Olfactory tubercle	IX	0.22034020486324787
85	Olfactory tubercle	lateral orbital gyrus	0.203789530681659
85	Olfactory tubercle	lingual gyrus	-0.012060084101331706
85	Olfactory tubercle	medial orbital gyrus	0.2793258235672667
85	Olfactory tubercle	midbrain tegmentum	0.35522274758698275
85	Olfactory tubercle	middle frontal gyrus	0.10710452302561772
85	Olfactory tubercle	middle temporal gyrus	0.1985972899643389
85	Olfactory tubercle	myelencephalon	0.3310536260740321
85	Olfactory tubercle	nucleus accumbens	0.8044075661509977
85	Olfactory tubercle	occipital pole	-0.012025673825449069
85	Olfactory tubercle	occipito-temporal gyrus	0.08802503598307881
85	Olfactory tubercle	paracentral lobule, anterior part	0.016139466774019496
85	Olfactory tubercle	paracentral lobule, posterior part	0.03215886315328898
85	Olfactory tubercle	parahippocampal gyrus	0.43035730241860676
85	Olfactory tubercle	paraterminal gyrus	0.5333647843798544
85	Olfactory tubercle	parolfactory gyri	0.4716944911395029
85	Olfactory tubercle	piriform cortex	0.7095191661575136
85	Olfactory tubercle	planum polare	0.3159306459887486
85	Olfactory tubercle	planum temporale	0.07687456886936975
85	Olfactory tubercle	pons	0.2842900928421247
85	Olfactory tubercle	postcentral gyrus	-0.018648054910213135
85	Olfactory tubercle	posterior orbital gyrus	0.297739593306285
85	Olfactory tubercle	precentral gyrus	-0.021478131213837712
85	Olfactory tubercle	precuneus	0.06511278852109606
85	Olfactory tubercle	pretectal region	0.36306816206094455
85	Olfactory tubercle	putamen	0.6934031125436771
85	Olfactory tubercle	septal nuclei	0.6265782602505565
85	Olfactory tubercle	subiculum	0.3972571123472044
85	Olfactory tubercle	substantia innominata	0.6570657166190538
85	Olfactory tubercle	subthalamus	0.27336816958933086
85	Olfactory tubercle	superior colliculus	0.29066518133879843
85	Olfactory tubercle	superior frontal gyrus	0.15187305530879155
85	Olfactory tubercle	superior occipital gyrus	0.027575091638114415
85	Olfactory tubercle	superior parietal lobule	0.008639193376921274
85	Olfactory tubercle	superior rostral gyrus	0.2716161046738367
85	Olfactory tubercle	superior temporal gyrus	0.1768619138975854
85	Olfactory tubercle	temporal pole	0.4062713069165935
85	Olfactory tubercle	thalamus	0.2491038106333454
85	Olfactory tubercle	transverse gyri	0.06075914989523103
85	Olfactory tubercle	V	0.19080242073111037
85	Olfactory tubercle	vermal I-II	0.251404649564137
85	Olfactory tubercle	vermal III	0.22664472196444066
85	Olfactory tubercle	vermal IV	0.21340898235096806
85	Olfactory tubercle	vermal IX	0.2138613528837214
85	Olfactory tubercle	vermal V	0.18318221259070763
85	Olfactory tubercle	vermal VI	0.24304326865128573
85	Olfactory tubercle	vermal VIIAf	0.21136430154707006
85	Olfactory tubercle	vermal VIIAt	0.1973092550888182
85	Olfactory tubercle	vermal VIIB	0.2268188721321333
85	Olfactory tubercle	vermal VIIIA	0.21483410992748378
85	Olfactory tubercle	vermal VIIIB	0.23932503728223967
85	Olfactory tubercle	vermal X	0.26308459844064314
85	Olfactory tubercle	VI	0.1912278561250802
85	Olfactory tubercle	VIIB	0.2015930197322452
85	Olfactory tubercle	VIIIA	0.19664757987969053
85	Olfactory tubercle	VIIIB	0.22979745322939965
85	Olfactory tubercle	X	0.24122264583120268
86	Olfactory tubercle	amygdala	0.7497510169170423
86	Olfactory tubercle	anterior orbital gyrus	0.22060097991039715
86	Olfactory tubercle	CA1 field	0.4195163601135069
86	Olfactory tubercle	CA2 field	0.4550140940831838
86	Olfactory tubercle	CA3 field	0.45344360091886443
86	Olfactory tubercle	CA4 field	0.5216769172266481
86	Olfactory tubercle	caudate nucleus	0.7077383862474275
86	Olfactory tubercle	cerebellar nuclei	0.32406637525402504
86	Olfactory tubercle	cingulate gyrus	0.24263420764833002
86	Olfactory tubercle	claustrum	0.44578754245136293
86	Olfactory tubercle	crus I	0.21723639380871523
86	Olfactory tubercle	crus II	0.211855185990714
86	Olfactory tubercle	cuneus	-0.0371184140126435
86	Olfactory tubercle	dentate gyrus	0.5699629382264326
86	Olfactory tubercle	epithalamus	0.4596858531896643
86	Olfactory tubercle	frontal operculum	0.233721416475114
86	Olfactory tubercle	frontal pole	0.15553152171642645
86	Olfactory tubercle	fusiform gyrus	0.3155541468715887
86	Olfactory tubercle	globus pallidus	0.41104630157939015
86	Olfactory tubercle	gyrus rectus	0.29174113222403214
86	Olfactory tubercle	Heschl's gyrus	0.06711175944176223
86	Olfactory tubercle	hypothalamus	0.470782894773102
86	Olfactory tubercle	III	0.21247562056601532
86	Olfactory tubercle	inferior colliculus	0.31462265987728155
86	Olfactory tubercle	inferior frontal gyrus	0.13112929929451173
86	Olfactory tubercle	inferior occipital gyrus	0.02899121298935523
86	Olfactory tubercle	inferior parietal lobule	0.07250007841529173
86	Olfactory tubercle	inferior rostral gyrus	0.29249227397875266
86	Olfactory tubercle	inferior temporal gyrus	0.24073451692010972
86	Olfactory tubercle	insula	0.3210792394492179
86	Olfactory tubercle	IV	0.22162436699199645
86	Olfactory tubercle	IX	0.23192122572476337
86	Olfactory tubercle	lateral orbital gyrus	0.1876310277295196
86	Olfactory tubercle	lingual gyrus	-0.03512379443568733
86	Olfactory tubercle	medial orbital gyrus	0.2695442310947595
86	Olfactory tubercle	midbrain tegmentum	0.3769582982649232
86	Olfactory tubercle	middle frontal gyrus	0.09297825760528311
86	Olfactory tubercle	middle temporal gyrus	0.18212570655233004
86	Olfactory tubercle	myelencephalon	0.35118583791266983
86	Olfactory tubercle	nucleus accumbens	0.8029593717138507
86	Olfactory tubercle	occipital pole	-0.03606982327341957
86	Olfactory tubercle	occipito-temporal gyrus	0.06688863468061791
86	Olfactory tubercle	paracentral lobule, anterior part	-0.0017679423483247777
86	Olfactory tubercle	paracentral lobule, posterior part	0.016193842006251017
86	Olfactory tubercle	parahippocampal gyrus	0.4297186311649395
86	Olfactory tubercle	paraterminal gyrus	0.5554859673411819
86	Olfactory tubercle	parolfactory gyri	0.47513666723208514
86	Olfactory tubercle	piriform cortex	0.7194744120537643
86	Olfactory tubercle	planum polare	0.30154541163835463
86	Olfactory tubercle	planum temporale	0.06184381587702333
86	Olfactory tubercle	pons	0.3028825946836656
86	Olfactory tubercle	postcentral gyrus	-0.03928675976738451
86	Olfactory tubercle	posterior orbital gyrus	0.28262106362022943
86	Olfactory tubercle	precentral gyrus	-0.03832708121415943
86	Olfactory tubercle	precuneus	0.04770751512965519
86	Olfactory tubercle	pretectal region	0.38512289338712236
86	Olfactory tubercle	putamen	0.6825964765714537
86	Olfactory tubercle	septal nuclei	0.6503920846829031
86	Olfactory tubercle	subiculum	0.41724546142249896
86	Olfactory tubercle	substantia innominata	0.6729378572819388
86	Olfactory tubercle	subthalamus	0.28970670221354355
86	Olfactory tubercle	superior colliculus	0.3128614125518921
86	Olfactory tubercle	superior frontal gyrus	0.1393777732531913
86	Olfactory tubercle	superior occipital gyrus	0.007098027240540101
86	Olfactory tubercle	superior parietal lobule	-0.009834219300368862
86	Olfactory tubercle	superior rostral gyrus	0.26368516617357074
86	Olfactory tubercle	superior temporal gyrus	0.16047975357770516
86	Olfactory tubercle	temporal pole	0.40213704556204743
86	Olfactory tubercle	thalamus	0.2646376284229946
86	Olfactory tubercle	transverse gyri	0.03879597125647979
86	Olfactory tubercle	V	0.20485947316459474
86	Olfactory tubercle	vermal I-II	0.27215495036913445
86	Olfactory tubercle	vermal III	0.24363224929684094
86	Olfactory tubercle	vermal IV	0.2294784223204087
86	Olfactory tubercle	vermal IX	0.23145601114246903
86	Olfactory tubercle	vermal V	0.19672867547378553
86	Olfactory tubercle	vermal VI	0.26053536697416324
86	Olfactory tubercle	vermal VIIAf	0.2261360909037032
86	Olfactory tubercle	vermal VIIAt	0.21033865420391276
86	Olfactory tubercle	vermal VIIB	0.2425528187237897
86	Olfactory tubercle	vermal VIIIA	0.2302256247339602
86	Olfactory tubercle	vermal VIIIB	0.258060918942314
86	Olfactory tubercle	vermal X	0.28887839555516914
86	Olfactory tubercle	VI	0.205802034312104
86	Olfactory tubercle	VIIB	0.21620310849733662
86	Olfactory tubercle	VIIIA	0.20955117917945298
86	Olfactory tubercle	VIIIB	0.24529405323654363
86	Olfactory tubercle	X	0.2600370783453674
245	Medial amygdalar nucleus	amygdala	0.7454194745059128
245	Medial amygdalar nucleus	anterior orbital gyrus	0.12753170273436032
245	Medial amygdalar nucleus	CA1 field	0.4148559958566396
245	Medial amygdalar nucleus	CA2 field	0.4959593899149928
245	Medial amygdalar nucleus	CA3 field	0.5119218177225219
245	Medial amygdalar nucleus	CA4 field	0.59080996806007
245	Medial amygdalar nucleus	caudate nucleus	0.32979101614772155
245	Medial amygdalar nucleus	cerebellar nuclei	0.4262715527763567
245	Medial amygdalar nucleus	cingulate gyrus	0.1670488078607048
245	Medial amygdalar nucleus	claustrum	0.3177920919225464
245	Medial amygdalar nucleus	crus I	0.3612099709190402
245	Medial amygdalar nucleus	crus II	0.3393547828825785
245	Medial amygdalar nucleus	cuneus	-0.10132225330728348
245	Medial amygdalar nucleus	dentate gyrus	0.45281726317849774
245	Medial amygdalar nucleus	epithalamus	0.6509528040131798
245	Medial amygdalar nucleus	frontal operculum	0.1258502378578103
245	Medial amygdalar nucleus	frontal pole	0.08074606867451559
245	Medial amygdalar nucleus	fusiform gyrus	0.21588946440783102
245	Medial amygdalar nucleus	globus pallidus	0.41340418430321946
245	Medial amygdalar nucleus	gyrus rectus	0.1999264886496696
245	Medial amygdalar nucleus	Heschl's gyrus	-0.0334809616642649
245	Medial amygdalar nucleus	hypothalamus	0.67100325231331
245	Medial amygdalar nucleus	III	0.3753862425167835
245	Medial amygdalar nucleus	inferior colliculus	0.46202365368111603
245	Medial amygdalar nucleus	inferior frontal gyrus	0.03750888030684218
245	Medial amygdalar nucleus	inferior occipital gyrus	-0.056095931869365706
245	Medial amygdalar nucleus	inferior parietal lobule	-0.0058354554619338556
245	Medial amygdalar nucleus	inferior rostral gyrus	0.2319692096954442
245	Medial amygdalar nucleus	inferior temporal gyrus	0.1486375687072978
245	Medial amygdalar nucleus	insula	0.2210327427745089
245	Medial amygdalar nucleus	IV	0.3643631625220067
245	Medial amygdalar nucleus	IX	0.3260274773853063
245	Medial amygdalar nucleus	lateral orbital gyrus	0.08543578609771406
245	Medial amygdalar nucleus	lingual gyrus	-0.10487081627042369
245	Medial amygdalar nucleus	medial orbital gyrus	0.18265831153018172
245	Medial amygdalar nucleus	midbrain tegmentum	0.5386468928543116
245	Medial amygdalar nucleus	middle frontal gyrus	0.031721145156333834
245	Medial amygdalar nucleus	middle temporal gyrus	0.07699559895316659
245	Medial amygdalar nucleus	myelencephalon	0.5047183743642847
245	Medial amygdalar nucleus	nucleus accumbens	0.48920237367356284
245	Medial amygdalar nucleus	occipital pole	-0.11168352564502089
245	Medial amygdalar nucleus	occipito-temporal gyrus	-0.03752862479188331
245	Medial amygdalar nucleus	paracentral lobule, anterior part	-0.08180514277882048
245	Medial amygdalar nucleus	paracentral lobule, posterior part	-0.004583675947255062
245	Medial amygdalar nucleus	parahippocampal gyrus	0.37889776096761607
245	Medial amygdalar nucleus	paraterminal gyrus	0.5816178849692838
245	Medial amygdalar nucleus	parolfactory gyri	0.4137363470909385
245	Medial amygdalar nucleus	piriform cortex	0.6720822005358679
245	Medial amygdalar nucleus	planum polare	0.17038037020541644
245	Medial amygdalar nucleus	planum temporale	0.011862460645049085
245	Medial amygdalar nucleus	pons	0.46097497318928937
245	Medial amygdalar nucleus	postcentral gyrus	-0.11456729745244745
245	Medial amygdalar nucleus	posterior orbital gyrus	0.15586669966161404
245	Medial amygdalar nucleus	precentral gyrus	-0.09703389176781763
245	Medial amygdalar nucleus	precuneus	-0.024263833106441358
245	Medial amygdalar nucleus	pretectal region	0.5250438301473026
245	Medial amygdalar nucleus	putamen	0.30451711892387034
245	Medial amygdalar nucleus	septal nuclei	0.6928833797402276
245	Medial amygdalar nucleus	subiculum	0.4890862157703425
245	Medial amygdalar nucleus	substantia innominata	0.6522415949249024
245	Medial amygdalar nucleus	subthalamus	0.41040759819450245
245	Medial amygdalar nucleus	superior colliculus	0.4871021618510159
245	Medial amygdalar nucleus	superior frontal gyrus	0.07011667711910234
245	Medial amygdalar nucleus	superior occipital gyrus	-0.07086259808980862
245	Medial amygdalar nucleus	superior parietal lobule	-0.07182512710017995
245	Medial amygdalar nucleus	superior rostral gyrus	0.18591958884488258
245	Medial amygdalar nucleus	superior temporal gyrus	0.06193357488539296
245	Medial amygdalar nucleus	temporal pole	0.31641704338816423
245	Medial amygdalar nucleus	thalamus	0.4343207394204578
245	Medial amygdalar nucleus	transverse gyri	-0.06645323970916975
245	Medial amygdalar nucleus	V	0.34707908263505116
245	Medial amygdalar nucleus	vermal I-II	0.4687068118274677
245	Medial amygdalar nucleus	vermal III	0.4038227511150446
245	Medial amygdalar nucleus	vermal IV	0.3847516828192435
245	Medial amygdalar nucleus	vermal IX	0.397462387636791
245	Medial amygdalar nucleus	vermal V	0.33492851515331
245	Medial amygdalar nucleus	vermal VI	0.4245622420460058
245	Medial amygdalar nucleus	vermal VIIAf	0.3726395546028103
245	Medial amygdalar nucleus	vermal VIIAt	0.3310344183850613
245	Medial amygdalar nucleus	vermal VIIB	0.3888846596953575
245	Medial amygdalar nucleus	vermal VIIIA	0.3761836103880301
245	Medial amygdalar nucleus	vermal VIIIB	0.42903909743383223
245	Medial amygdalar nucleus	vermal X	0.5341367105362965
245	Medial amygdalar nucleus	VI	0.3543557776197802
245	Medial amygdalar nucleus	VIIB	0.35452419097790505
245	Medial amygdalar nucleus	VIIIA	0.3304329073571433
245	Medial amygdalar nucleus	VIIIB	0.3834369154582419
245	Medial amygdalar nucleus	X	0.4330501906963719
296	Olfactory tubercle	amygdala	0.7589254826473805
296	Olfactory tubercle	anterior orbital gyrus	0.22634161637031858
296	Olfactory tubercle	CA1 field	0.4158210838687519
296	Olfactory tubercle	CA2 field	0.471777237259861
296	Olfactory tubercle	CA3 field	0.47282557449244916
296	Olfactory tubercle	CA4 field	0.5499016180308376
296	Olfactory tubercle	caudate nucleus	0.6715632164895615
296	Olfactory tubercle	cerebellar nuclei	0.31177189080678036
296	Olfactory tubercle	cingulate gyrus	0.24920282852516062
296	Olfactory tubercle	claustrum	0.4471562690842462
296	Olfactory tubercle	crus I	0.2116584840315256
296	Olfactory tubercle	crus II	0.20341302095437513
296	Olfactory tubercle	cuneus	-0.01695345000289987
296	Olfactory tubercle	dentate gyrus	0.572728071724948
296	Olfactory tubercle	epithalamus	0.4615890233754257
296	Olfactory tubercle	frontal operculum	0.24363510624445459
296	Olfactory tubercle	frontal pole	0.16026258854506414
296	Olfactory tubercle	fusiform gyrus	0.32933639965580963
296	Olfactory tubercle	globus pallidus	0.3813726429752265
296	Olfactory tubercle	gyrus rectus	0.3001298037012865
296	Olfactory tubercle	Heschl's gyrus	0.08332014238460365
296	Olfactory tubercle	hypothalamus	0.47923875074528727
296	Olfactory tubercle	III	0.20688030825008735
296	Olfactory tubercle	inferior colliculus	0.31076524245191584
296	Olfactory tubercle	inferior frontal gyrus	0.14464317940007612
296	Olfactory tubercle	inferior occipital gyrus	0.043184640483635524
296	Olfactory tubercle	inferior parietal lobule	0.08620458606249057
296	Olfactory tubercle	inferior rostral gyrus	0.3091937904174071
296	Olfactory tubercle	inferior temporal gyrus	0.25457512261879167
296	Olfactory tubercle	insula	0.33615612426747354
296	Olfactory tubercle	IV	0.21466220068162253
296	Olfactory tubercle	IX	0.21737762291077625
296	Olfactory tubercle	lateral orbital gyrus	0.19967108538471962
296	Olfactory tubercle	lingual gyrus	-0.015613603237711157
296	Olfactory tubercle	medial orbital gyrus	0.27954376296711103
296	Olfactory tubercle	midbrain tegmentum	0.3718442749113372
296	Olfactory tubercle	middle frontal gyrus	0.1037233830474771
296	Olfactory tubercle	middle temporal gyrus	0.19291058297828137
296	Olfactory tubercle	myelencephalon	0.34590450980007564
296	Olfactory tubercle	nucleus accumbens	0.7713745026434311
296	Olfactory tubercle	occipital pole	-0.011833325165864519
296	Olfactory tubercle	occipito-temporal gyrus	0.07829216040177452
296	Olfactory tubercle	paracentral lobule, anterior part	7.83154263212988e-4
296	Olfactory tubercle	paracentral lobule, posterior part	0.03921086918716985
296	Olfactory tubercle	parahippocampal gyrus	0.4446887919319091
296	Olfactory tubercle	paraterminal gyrus	0.5563227435149195
296	Olfactory tubercle	parolfactory gyri	0.4813717582474147
296	Olfactory tubercle	piriform cortex	0.7372444082530419
296	Olfactory tubercle	planum polare	0.3122952446905532
296	Olfactory tubercle	planum temporale	0.0763265343745337
296	Olfactory tubercle	pons	0.29813304086885656
296	Olfactory tubercle	postcentral gyrus	-0.030350420301566008
296	Olfactory tubercle	posterior orbital gyrus	0.28894212816491316
296	Olfactory tubercle	precentral gyrus	-0.03658017072752663
296	Olfactory tubercle	precuneus	0.05766883709888527
296	Olfactory tubercle	pretectal region	0.37370462741173827
296	Olfactory tubercle	putamen	0.6414143662597471
296	Olfactory tubercle	septal nuclei	0.6397979467999877
296	Olfactory tubercle	subiculum	0.4215030415336029
296	Olfactory tubercle	substantia innominata	0.6585389599924548
296	Olfactory tubercle	subthalamus	0.27752807359428827
296	Olfactory tubercle	superior colliculus	0.309295993632503
296	Olfactory tubercle	superior frontal gyrus	0.14768338346924828
296	Olfactory tubercle	superior occipital gyrus	0.020088105429084225
296	Olfactory tubercle	superior parietal lobule	1.0603131518180015e-4
296	Olfactory tubercle	superior rostral gyrus	0.27217106961107784
296	Olfactory tubercle	superior temporal gyrus	0.1709801924446223
296	Olfactory tubercle	temporal pole	0.4145498745378458
296	Olfactory tubercle	thalamus	0.26920841806195994
296	Olfactory tubercle	transverse gyri	0.04952679743594322
296	Olfactory tubercle	V	0.19855214234729762
296	Olfactory tubercle	vermal I-II	0.2756552368907671
296	Olfactory tubercle	vermal III	0.24036104679665257
296	Olfactory tubercle	vermal IV	0.22494695890338054
296	Olfactory tubercle	vermal IX	0.2281549717409125
296	Olfactory tubercle	vermal V	0.19029508610054563
296	Olfactory tubercle	vermal VI	0.2571983564261336
296	Olfactory tubercle	vermal VIIAf	0.21998454629586414
296	Olfactory tubercle	vermal VIIAt	0.20041143553399882
296	Olfactory tubercle	vermal VIIB	0.23873491697284627
296	Olfactory tubercle	vermal VIIIA	0.22477990672428907
296	Olfactory tubercle	vermal VIIIB	0.2554200536943099
296	Olfactory tubercle	vermal X	0.3004464431171759
296	Olfactory tubercle	VI	0.20069699123384893
296	Olfactory tubercle	VIIB	0.20877388021114163
296	Olfactory tubercle	VIIIA	0.200328952008936
296	Olfactory tubercle	VIIIB	0.23720331194379488
296	Olfactory tubercle	X	0.2578120776244114
297	Olfactory tubercle	amygdala	0.7679319984446015
297	Olfactory tubercle	anterior orbital gyrus	0.2018481886037329
297	Olfactory tubercle	CA1 field	0.4132015813787637
297	Olfactory tubercle	CA2 field	0.4713032062556735
297	Olfactory tubercle	CA3 field	0.4775136118675617
297	Olfactory tubercle	CA4 field	0.5575045562275235
297	Olfactory tubercle	caudate nucleus	0.6776488182513064
297	Olfactory tubercle	cerebellar nuclei	0.3433886461505858
297	Olfactory tubercle	cingulate gyrus	0.22692376039274775
297	Olfactory tubercle	claustrum	0.4145221626689588
297	Olfactory tubercle	crus I	0.2289078127100791
297	Olfactory tubercle	crus II	0.21820316355714206
297	Olfactory tubercle	cuneus	-0.01755454536762059
297	Olfactory tubercle	dentate gyrus	0.5676293436335943
297	Olfactory tubercle	epithalamus	0.50594740598209
297	Olfactory tubercle	frontal operculum	0.2136876639732155
297	Olfactory tubercle	frontal pole	0.13789454910641052
297	Olfactory tubercle	fusiform gyrus	0.29961135877893663
297	Olfactory tubercle	globus pallidus	0.40963773758172206
297	Olfactory tubercle	gyrus rectus	0.2705164150029034
297	Olfactory tubercle	Heschl's gyrus	0.06980369679439517
297	Olfactory tubercle	hypothalamus	0.5247123937054914
297	Olfactory tubercle	III	0.23099646072804975
297	Olfactory tubercle	inferior colliculus	0.35665595525013016
297	Olfactory tubercle	inferior frontal gyrus	0.12294636193573288
297	Olfactory tubercle	inferior occipital gyrus	0.033569702307596726
297	Olfactory tubercle	inferior parietal lobule	0.07026293499785512
297	Olfactory tubercle	inferior rostral gyrus	0.2816309518312905
297	Olfactory tubercle	inferior temporal gyrus	0.22689286536309633
297	Olfactory tubercle	insula	0.30662442503229637
297	Olfactory tubercle	IV	0.23321333825443283
297	Olfactory tubercle	IX	0.22851632749764653
297	Olfactory tubercle	lateral orbital gyrus	0.17565086697166313
297	Olfactory tubercle	lingual gyrus	-0.018161431832938807
297	Olfactory tubercle	medial orbital gyrus	0.25156610323581485
297	Olfactory tubercle	midbrain tegmentum	0.4121047828811782
297	Olfactory tubercle	middle frontal gyrus	0.08613332223566189
297	Olfactory tubercle	middle temporal gyrus	0.16817174273100893
297	Olfactory tubercle	myelencephalon	0.3796626523651085
297	Olfactory tubercle	nucleus accumbens	0.781011260033086
297	Olfactory tubercle	occipital pole	-0.016108992391070987
297	Olfactory tubercle	occipito-temporal gyrus	0.0627547134737644
297	Olfactory tubercle	paracentral lobule, anterior part	-0.009050316445959513
297	Olfactory tubercle	paracentral lobule, posterior part	0.03128809032463246
297	Olfactory tubercle	parahippocampal gyrus	0.4184765044266089
297	Olfactory tubercle	paraterminal gyrus	0.5612915253284898
297	Olfactory tubercle	parolfactory gyri	0.4580368649484817
297	Olfactory tubercle	piriform cortex	0.7218117334108158
297	Olfactory tubercle	planum polare	0.2833695894831239
297	Olfactory tubercle	planum temporale	0.06502140244300109
297	Olfactory tubercle	pons	0.33222281140854554
297	Olfactory tubercle	postcentral gyrus	-0.03537404952430177
297	Olfactory tubercle	posterior orbital gyrus	0.2604346115430948
297	Olfactory tubercle	precentral gyrus	-0.043686683367263446
297	Olfactory tubercle	precuneus	0.04494705226072347
297	Olfactory tubercle	pretectal region	0.4180409356268213
297	Olfactory tubercle	putamen	0.6498796505613869
297	Olfactory tubercle	septal nuclei	0.6823446355419677
297	Olfactory tubercle	subiculum	0.4233207663011551
297	Olfactory tubercle	substantia innominata	0.6917981557254331
297	Olfactory tubercle	subthalamus	0.3127899175220734
297	Olfactory tubercle	superior colliculus	0.35899502882687784
297	Olfactory tubercle	superior frontal gyrus	0.12736266407657165
297	Olfactory tubercle	superior occipital gyrus	0.013056721442889127
297	Olfactory tubercle	superior parietal lobule	-0.008125739789904794
297	Olfactory tubercle	superior rostral gyrus	0.24827715235095887
297	Olfactory tubercle	superior temporal gyrus	0.14884365873021738
297	Olfactory tubercle	temporal pole	0.3833805644598622
297	Olfactory tubercle	thalamus	0.3147137832130694
297	Olfactory tubercle	transverse gyri	0.037688755931324314
297	Olfactory tubercle	V	0.2159310120974352
297	Olfactory tubercle	vermal I-II	0.3080564298225557
297	Olfactory tubercle	vermal III	0.26319071795258436
297	Olfactory tubercle	vermal IV	0.24605356620946806
297	Olfactory tubercle	vermal IX	0.25090313163634254
297	Olfactory tubercle	vermal V	0.2077329470074886
297	Olfactory tubercle	vermal VI	0.27865084864629386
297	Olfactory tubercle	vermal VIIAf	0.23796255409853348
297	Olfactory tubercle	vermal VIIAt	0.21578575930347263
297	Olfactory tubercle	vermal VIIB	0.2599932108787215
297	Olfactory tubercle	vermal VIIIA	0.24345729379266523
297	Olfactory tubercle	vermal VIIIB	0.2810835982430269
297	Olfactory tubercle	vermal X	0.3379043088965015
297	Olfactory tubercle	VI	0.2185174879864092
297	Olfactory tubercle	VIIB	0.22584563518118178
297	Olfactory tubercle	VIIIA	0.21398256737633706
297	Olfactory tubercle	VIIIB	0.255265954049477
297	Olfactory tubercle	X	0.2801944281040239
298	Olfactory tubercle	amygdala	0.7802378817342719
298	Olfactory tubercle	anterior orbital gyrus	0.1879133004803787
298	Olfactory tubercle	CA1 field	0.42290339203260136
298	Olfactory tubercle	CA2 field	0.48138037043075466
298	Olfactory tubercle	CA3 field	0.4901224264865221
298	Olfactory tubercle	CA4 field	0.5720798272471672
298	Olfactory tubercle	caudate nucleus	0.6658815398564015
298	Olfactory tubercle	cerebellar nuclei	0.37569477714907873
298	Olfactory tubercle	cingulate gyrus	0.2159067580344868
298	Olfactory tubercle	claustrum	0.39875643457080306
298	Olfactory tubercle	crus I	0.2532193015151115
298	Olfactory tubercle	crus II	0.24024842648217082
298	Olfactory tubercle	cuneus	-0.030091969469417616
298	Olfactory tubercle	dentate gyrus	0.5662893325979058
298	Olfactory tubercle	epithalamus	0.5502993315071267
298	Olfactory tubercle	frontal operculum	0.1964232796813441
298	Olfactory tubercle	frontal pole	0.12451588867807635
298	Olfactory tubercle	fusiform gyrus	0.28457543777416106
298	Olfactory tubercle	globus pallidus	0.43692226664037054
298	Olfactory tubercle	gyrus rectus	0.2565002604354469
298	Olfactory tubercle	Heschl's gyrus	0.05318226385960029
298	Olfactory tubercle	hypothalamus	0.5639875462212164
298	Olfactory tubercle	III	0.2605367003106508
298	Olfactory tubercle	inferior colliculus	0.3968724125485881
298	Olfactory tubercle	inferior frontal gyrus	0.10648854491732727
298	Olfactory tubercle	inferior occipital gyrus	0.018854133209783464
298	Olfactory tubercle	inferior parietal lobule	0.05597837078019737
298	Olfactory tubercle	inferior rostral gyrus	0.2694486927621258
298	Olfactory tubercle	inferior temporal gyrus	0.21132944086320443
298	Olfactory tubercle	insula	0.29136186324316615
298	Olfactory tubercle	IV	0.2590136710233122
298	Olfactory tubercle	IX	0.24752926883943618
298	Olfactory tubercle	lateral orbital gyrus	0.15857293551938723
298	Olfactory tubercle	lingual gyrus	-0.031634807672247627
298	Olfactory tubercle	medial orbital gyrus	0.23733847119170592
298	Olfactory tubercle	midbrain tegmentum	0.45045571812376234
298	Olfactory tubercle	middle frontal gyrus	0.07400284336419125
298	Olfactory tubercle	middle temporal gyrus	0.15135169230067577
298	Olfactory tubercle	myelencephalon	0.4146589098152144
298	Olfactory tubercle	nucleus accumbens	0.7754432134402318
298	Olfactory tubercle	occipital pole	-0.0309500855306289
298	Olfactory tubercle	occipito-temporal gyrus	0.045963107198251724
298	Olfactory tubercle	paracentral lobule, anterior part	-0.021317704466681343
298	Olfactory tubercle	paracentral lobule, posterior part	0.021646731006549017
298	Olfactory tubercle	parahippocampal gyrus	0.4106872823842805
298	Olfactory tubercle	paraterminal gyrus	0.5768985348178836
298	Olfactory tubercle	parolfactory gyri	0.45196636869054124
298	Olfactory tubercle	piriform cortex	0.7191284466619068
298	Olfactory tubercle	planum polare	0.2653673178873479
298	Olfactory tubercle	planum temporale	0.05431492828404655
298	Olfactory tubercle	pons	0.3664804241664181
298	Olfactory tubercle	postcentral gyrus	-0.04783606277810029
298	Olfactory tubercle	posterior orbital gyrus	0.24225833294203297
298	Olfactory tubercle	precentral gyrus	-0.05369362598026956
298	Olfactory tubercle	precuneus	0.03199424095248999
298	Olfactory tubercle	pretectal region	0.4584341640953245
298	Olfactory tubercle	putamen	0.6396449647824293
298	Olfactory tubercle	septal nuclei	0.71421933307678
298	Olfactory tubercle	subiculum	0.4383383188824174
298	Olfactory tubercle	substantia innominata	0.7145184081937196
298	Olfactory tubercle	subthalamus	0.346712548290364
298	Olfactory tubercle	superior colliculus	0.4023137331409001
298	Olfactory tubercle	superior frontal gyrus	0.11523005298940978
298	Olfactory tubercle	superior occipital gyrus	-3.6640417042197793e-4
298	Olfactory tubercle	superior parietal lobule	-0.019822978306299636
298	Olfactory tubercle	superior rostral gyrus	0.23675355904815107
298	Olfactory tubercle	superior temporal gyrus	0.1329919573653351
298	Olfactory tubercle	temporal pole	0.3714130419913029
298	Olfactory tubercle	thalamus	0.35472005623248726
298	Olfactory tubercle	transverse gyri	0.021709238411517704
298	Olfactory tubercle	V	0.2401170903245442
298	Olfactory tubercle	vermal I-II	0.3449345491084545
298	Olfactory tubercle	vermal III	0.29231799338816833
298	Olfactory tubercle	vermal IV	0.2732374861145145
298	Olfactory tubercle	vermal IX	0.2795611477012191
298	Olfactory tubercle	vermal V	0.23130932674737306
298	Olfactory tubercle	vermal VI	0.30732483623309204
298	Olfactory tubercle	vermal VIIAf	0.2626718065642376
298	Olfactory tubercle	vermal VIIAt	0.23768123567759084
298	Olfactory tubercle	vermal VIIB	0.2870063202366644
298	Olfactory tubercle	vermal VIIIA	0.2687467292548356
298	Olfactory tubercle	vermal VIIIB	0.31212034932112753
298	Olfactory tubercle	vermal X	0.3804566079599962
298	Olfactory tubercle	VI	0.24312074117806318
298	Olfactory tubercle	VIIB	0.24986388055140943
298	Olfactory tubercle	VIIIA	0.2349097684448541
298	Olfactory tubercle	VIIIB	0.2805770932566475
298	Olfactory tubercle	X	0.3105684667129849
299	Olfactory tubercle	amygdala	0.7503386124819035
299	Olfactory tubercle	anterior orbital gyrus	0.18121361938801672
299	Olfactory tubercle	CA1 field	0.38523876520113814
299	Olfactory tubercle	CA2 field	0.4512081106693275
299	Olfactory tubercle	CA3 field	0.4593266981324247
299	Olfactory tubercle	CA4 field	0.5370379712421772
299	Olfactory tubercle	caudate nucleus	0.7193627656225896
299	Olfactory tubercle	cerebellar nuclei	0.3468599019512852
299	Olfactory tubercle	cingulate gyrus	0.20297105146684946
299	Olfactory tubercle	claustrum	0.40247653436821207
299	Olfactory tubercle	crus I	0.2132163495425961
299	Olfactory tubercle	crus II	0.2050424469248405
299	Olfactory tubercle	cuneus	-0.023703215738215426
299	Olfactory tubercle	dentate gyrus	0.5543220221788319
299	Olfactory tubercle	epithalamus	0.4929451946912463
299	Olfactory tubercle	frontal operculum	0.19647918180933455
299	Olfactory tubercle	frontal pole	0.11428295740605796
299	Olfactory tubercle	fusiform gyrus	0.27851430713707226
299	Olfactory tubercle	globus pallidus	0.4211191933527105
299	Olfactory tubercle	gyrus rectus	0.2469307887609365
299	Olfactory tubercle	Heschl's gyrus	0.05927563963143246
299	Olfactory tubercle	hypothalamus	0.5167674098459294
299	Olfactory tubercle	III	0.2101732391624474
299	Olfactory tubercle	inferior colliculus	0.3432178563601914
299	Olfactory tubercle	inferior frontal gyrus	0.10897780624877429
299	Olfactory tubercle	inferior occipital gyrus	0.024979491718147572
299	Olfactory tubercle	inferior parietal lobule	0.05604030843331031
299	Olfactory tubercle	inferior rostral gyrus	0.2549910817175817
299	Olfactory tubercle	inferior temporal gyrus	0.20552496480220261
299	Olfactory tubercle	insula	0.28475369047822113
299	Olfactory tubercle	IV	0.2161118803641726
299	Olfactory tubercle	IX	0.2200222564274269
299	Olfactory tubercle	lateral orbital gyrus	0.15604788493117214
299	Olfactory tubercle	lingual gyrus	-0.025318667452413172
299	Olfactory tubercle	medial orbital gyrus	0.22855336760832898
299	Olfactory tubercle	midbrain tegmentum	0.4109244640501085
299	Olfactory tubercle	middle frontal gyrus	0.0686433733244066
299	Olfactory tubercle	middle temporal gyrus	0.15139402129073032
299	Olfactory tubercle	myelencephalon	0.3813331248595594
299	Olfactory tubercle	nucleus accumbens	0.8127858651372771
299	Olfactory tubercle	occipital pole	-0.020473600288957314
299	Olfactory tubercle	occipito-temporal gyrus	0.05360327870032599
299	Olfactory tubercle	paracentral lobule, anterior part	-0.014286660384365575
299	Olfactory tubercle	paracentral lobule, posterior part	0.013870438188597255
299	Olfactory tubercle	parahippocampal gyrus	0.3853675220684902
299	Olfactory tubercle	paraterminal gyrus	0.5245057933901387
299	Olfactory tubercle	parolfactory gyri	0.43274704504150663
299	Olfactory tubercle	piriform cortex	0.6915954863032099
299	Olfactory tubercle	planum polare	0.26770117135206056
299	Olfactory tubercle	planum temporale	0.04338620636137506
299	Olfactory tubercle	pons	0.3326793819303083
299	Olfactory tubercle	postcentral gyrus	-0.04012334754072727
299	Olfactory tubercle	posterior orbital gyrus	0.24427998872508142
299	Olfactory tubercle	precentral gyrus	-0.049876716123557055
299	Olfactory tubercle	precuneus	0.030978523631638586
299	Olfactory tubercle	pretectal region	0.41475016640789925
299	Olfactory tubercle	putamen	0.6952370565146455
299	Olfactory tubercle	septal nuclei	0.6855663689407838
299	Olfactory tubercle	subiculum	0.38478087067045863
299	Olfactory tubercle	substantia innominata	0.7086318564122518
299	Olfactory tubercle	subthalamus	0.3154561534924172
299	Olfactory tubercle	superior colliculus	0.3476313701118322
299	Olfactory tubercle	superior frontal gyrus	0.10855359796801894
299	Olfactory tubercle	superior occipital gyrus	0.003992589323169477
299	Olfactory tubercle	superior parietal lobule	-0.018944753721091376
299	Olfactory tubercle	superior rostral gyrus	0.2247956108262217
299	Olfactory tubercle	superior temporal gyrus	0.13352303991964026
299	Olfactory tubercle	temporal pole	0.3584473992690947
299	Olfactory tubercle	thalamus	0.300644428919992
299	Olfactory tubercle	transverse gyri	0.030200923964778463
299	Olfactory tubercle	V	0.19926117280851238
299	Olfactory tubercle	vermal I-II	0.28688503012104044
299	Olfactory tubercle	vermal III	0.24332913155875627
299	Olfactory tubercle	vermal IV	0.22710356036811524
299	Olfactory tubercle	vermal IX	0.23548317645694164
299	Olfactory tubercle	vermal V	0.1915119504217878
299	Olfactory tubercle	vermal VI	0.26052767455229336
299	Olfactory tubercle	vermal VIIAf	0.22113228383685674
299	Olfactory tubercle	vermal VIIAt	0.20159721115327064
299	Olfactory tubercle	vermal VIIB	0.24531863237370416
299	Olfactory tubercle	vermal VIIIA	0.2262702778053919
299	Olfactory tubercle	vermal VIIIB	0.26228629292168243
299	Olfactory tubercle	vermal X	0.31272695535389305
299	Olfactory tubercle	VI	0.20129302271540925
299	Olfactory tubercle	VIIB	0.21115105568423984
299	Olfactory tubercle	VIIIA	0.20073202176390245
299	Olfactory tubercle	VIIIB	0.24072633204368735
299	Olfactory tubercle	X	0.2617650365298047
300	Olfactory tubercle	amygdala	0.7475166648906743
300	Olfactory tubercle	anterior orbital gyrus	0.19795806358519752
300	Olfactory tubercle	CA1 field	0.39325005925263434
300	Olfactory tubercle	CA2 field	0.45939257624022617
300	Olfactory tubercle	CA3 field	0.46362861767623276
300	Olfactory tubercle	CA4 field	0.5388974910583473
300	Olfactory tubercle	caudate nucleus	0.7116928602293989
300	Olfactory tubercle	cerebellar nuclei	0.32033461773750205
300	Olfactory tubercle	cingulate gyrus	0.218239397023189
300	Olfactory tubercle	claustrum	0.42809364620418994
300	Olfactory tubercle	crus I	0.2099760547285896
300	Olfactory tubercle	crus II	0.20369530319343448
300	Olfactory tubercle	cuneus	-0.033152294924439295
300	Olfactory tubercle	dentate gyrus	0.5632425964262664
300	Olfactory tubercle	epithalamus	0.46190787275053724
300	Olfactory tubercle	frontal operculum	0.21740229818877532
300	Olfactory tubercle	frontal pole	0.12743298626768032
300	Olfactory tubercle	fusiform gyrus	0.30076241218384664
300	Olfactory tubercle	globus pallidus	0.3969509826748899
300	Olfactory tubercle	gyrus rectus	0.2694357348798247
300	Olfactory tubercle	Heschl's gyrus	0.061544138482653166
300	Olfactory tubercle	hypothalamus	0.4827327549735279
300	Olfactory tubercle	III	0.20060945870635558
300	Olfactory tubercle	inferior colliculus	0.30750998119071404
300	Olfactory tubercle	inferior frontal gyrus	0.12089084186194189
300	Olfactory tubercle	inferior occipital gyrus	0.024240355416068782
300	Olfactory tubercle	inferior parietal lobule	0.062319407233941145
300	Olfactory tubercle	inferior rostral gyrus	0.27558463807153133
300	Olfactory tubercle	inferior temporal gyrus	0.22434017740791606
300	Olfactory tubercle	insula	0.3066625905736815
300	Olfactory tubercle	IV	0.2113565400642967
300	Olfactory tubercle	IX	0.22066230005452056
300	Olfactory tubercle	lateral orbital gyrus	0.16967335878836287
300	Olfactory tubercle	lingual gyrus	-0.033610748770129255
300	Olfactory tubercle	medial orbital gyrus	0.24894515790434688
300	Olfactory tubercle	midbrain tegmentum	0.3784015297836819
300	Olfactory tubercle	middle frontal gyrus	0.07813401133967553
300	Olfactory tubercle	middle temporal gyrus	0.16628490357440323
300	Olfactory tubercle	myelencephalon	0.3529660456538117
300	Olfactory tubercle	nucleus accumbens	0.8041930978894705
300	Olfactory tubercle	occipital pole	-0.027106342467097855
300	Olfactory tubercle	occipito-temporal gyrus	0.058253786511035105
300	Olfactory tubercle	paracentral lobule, anterior part	-0.012955593344990409
300	Olfactory tubercle	paracentral lobule, posterior part	0.012981224902213461
300	Olfactory tubercle	parahippocampal gyrus	0.4066972465140184
300	Olfactory tubercle	paraterminal gyrus	0.5270820511443809
300	Olfactory tubercle	parolfactory gyri	0.4553411553365163
300	Olfactory tubercle	piriform cortex	0.7075435472446157
300	Olfactory tubercle	planum polare	0.2877994343775224
300	Olfactory tubercle	planum temporale	0.045239908296325036
300	Olfactory tubercle	pons	0.30273640448186173
300	Olfactory tubercle	postcentral gyrus	-0.04459364512277109
300	Olfactory tubercle	posterior orbital gyrus	0.26358187210278516
300	Olfactory tubercle	precentral gyrus	-0.05075980626645854
300	Olfactory tubercle	precuneus	0.034123317592373685
300	Olfactory tubercle	pretectal region	0.3804430634487578
300	Olfactory tubercle	putamen	0.6852951660093703
300	Olfactory tubercle	septal nuclei	0.6558570104183902
300	Olfactory tubercle	subiculum	0.3898111876719702
300	Olfactory tubercle	substantia innominata	0.6814219852783271
300	Olfactory tubercle	subthalamus	0.28554263172346783
300	Olfactory tubercle	superior colliculus	0.30975597344677086
300	Olfactory tubercle	superior frontal gyrus	0.12135265546088354
[truncated: 406,145 more rows]
