# Supplementary material for: Whole-brain comparison of rodent and human brains using spatial transcriptomics
Source: eLife. 2022 Nov 7;11:e79418. doi: 10.7554/eLife.79418 (PMC9708081; doi:10.7554/eLife.79418)
Supplement: Figure 6—source data 3. [file elife-79418-fig6-data3.csv]

Data	VoxelID	MouseRegion	TopHumanRegion	MaxCorrelation
LatentSpace_1	70	Olfactory tubercle	nucleus accumbens	0.760370302327012
LatentSpace_1	71	Olfactory tubercle	nucleus accumbens	0.778198022859288
LatentSpace_1	72	Olfactory tubercle	nucleus accumbens	0.806915373026651
LatentSpace_1	73	Olfactory tubercle	nucleus accumbens	0.806567097741396
LatentSpace_1	74	Olfactory tubercle	nucleus accumbens	0.787796053577595
LatentSpace_1	75	Olfactory tubercle	nucleus accumbens	0.770455039712964
LatentSpace_1	76	Olfactory tubercle	nucleus accumbens	0.791419272797466
LatentSpace_1	77	Olfactory tubercle	nucleus accumbens	0.800166833534494
LatentSpace_1	78	Olfactory tubercle	nucleus accumbens	0.774151685088506
LatentSpace_1	79	Olfactory tubercle	nucleus accumbens	0.800805947619027
LatentSpace_1	80	Olfactory tubercle	nucleus accumbens	0.813167828932883
LatentSpace_1	81	Olfactory tubercle	nucleus accumbens	0.814646267468343
LatentSpace_1	82	Olfactory tubercle	nucleus accumbens	0.802819288226201
LatentSpace_1	83	Olfactory tubercle	nucleus accumbens	0.76162923767921
LatentSpace_1	84	Olfactory tubercle	nucleus accumbens	0.770356924050561
LatentSpace_1	85	Olfactory tubercle	nucleus accumbens	0.777567850421909
LatentSpace_1	86	Olfactory tubercle	nucleus accumbens	0.775355013674845
LatentSpace_1	245	Medial amygdalar nucleus	amygdala	0.724198167708309
LatentSpace_1	296	Olfactory tubercle	amygdala	0.769569022605743
LatentSpace_1	297	Olfactory tubercle	amygdala	0.778798918122652
LatentSpace_1	298	Olfactory tubercle	amygdala	0.784317520981567
LatentSpace_1	299	Olfactory tubercle	nucleus accumbens	0.777893991391716
LatentSpace_1	300	Olfactory tubercle	nucleus accumbens	0.766828487908603
LatentSpace_1	303	Olfactory tubercle	nucleus accumbens	0.778758736567259
LatentSpace_1	304	Olfactory tubercle	nucleus accumbens	0.784224792729617
LatentSpace_1	305	Olfactory tubercle	nucleus accumbens	0.790416849896176
LatentSpace_1	306	Olfactory tubercle	nucleus accumbens	0.784924279088849
LatentSpace_1	307	Olfactory tubercle	nucleus accumbens	0.770404837326439
LatentSpace_1	308	Olfactory tubercle	substantia innominata	0.777969354109228
LatentSpace_1	309	Olfactory tubercle	nucleus accumbens	0.785000271069181
LatentSpace_1	310	Olfactory tubercle	nucleus accumbens	0.800550775077073
LatentSpace_1	311	Olfactory tubercle	nucleus accumbens	0.810902544270671
LatentSpace_1	312	Olfactory tubercle	nucleus accumbens	0.801704272762949
LatentSpace_1	313	Olfactory tubercle	nucleus accumbens	0.78512607450391
LatentSpace_1	314	Olfactory tubercle	nucleus accumbens	0.748863578169661
LatentSpace_1	315	Olfactory tubercle	nucleus accumbens	0.795428322810213
LatentSpace_1	316	Olfactory tubercle	nucleus accumbens	0.806994777501982
LatentSpace_1	317	Olfactory tubercle	nucleus accumbens	0.798535436275839
LatentSpace_1	318	Olfactory tubercle	nucleus accumbens	0.800131914211032
LatentSpace_1	319	Olfactory tubercle	nucleus accumbens	0.781325258396072
LatentSpace_1	320	Olfactory tubercle	nucleus accumbens	0.757395307849744
LatentSpace_1	321	Olfactory tubercle	nucleus accumbens	0.794673708517415
LatentSpace_1	322	Olfactory tubercle	nucleus accumbens	0.801481543094752
LatentSpace_1	323	Olfactory tubercle	nucleus accumbens	0.811306767246083
LatentSpace_1	324	Olfactory tubercle	nucleus accumbens	0.823982602747927
LatentSpace_1	325	Olfactory tubercle	nucleus accumbens	0.826379686675213
LatentSpace_1	326	Olfactory tubercle	nucleus accumbens	0.818403500224163
LatentSpace_1	327	Olfactory tubercle	nucleus accumbens	0.784153127084526
LatentSpace_1	328	Olfactory tubercle	nucleus accumbens	0.800632759251535
LatentSpace_1	329	Olfactory tubercle	nucleus accumbens	0.798943950106968
LatentSpace_1	330	Olfactory tubercle	nucleus accumbens	0.802113054824279
LatentSpace_1	331	Olfactory tubercle	nucleus accumbens	0.793589893548431
LatentSpace_1	332	Olfactory tubercle	nucleus accumbens	0.786655892620113
LatentSpace_1	333	Olfactory tubercle	amygdala	0.767214738191669
LatentSpace_1	334	Olfactory tubercle	nucleus accumbens	0.819508233317878
LatentSpace_1	335	Olfactory tubercle	nucleus accumbens	0.815419144134056
LatentSpace_1	336	Olfactory tubercle	nucleus accumbens	0.816038611065712
LatentSpace_1	337	Olfactory tubercle	nucleus accumbens	0.823575404339758
LatentSpace_1	338	Olfactory tubercle	nucleus accumbens	0.824955070883787
LatentSpace_1	339	Olfactory tubercle	nucleus accumbens	0.826763829922919
LatentSpace_1	340	Olfactory tubercle	nucleus accumbens	0.818023889458668
LatentSpace_1	341	Olfactory tubercle	nucleus accumbens	0.773819042115212
LatentSpace_1	342	Olfactory tubercle	nucleus accumbens	0.786928814439164
LatentSpace_1	343	Olfactory tubercle	nucleus accumbens	0.786567229189016
LatentSpace_1	344	Olfactory tubercle	nucleus accumbens	0.795866234679133
LatentSpace_1	345	Olfactory tubercle	nucleus accumbens	0.792010748104603
LatentSpace_1	346	Olfactory tubercle	nucleus accumbens	0.786416243453284
LatentSpace_1	347	Olfactory tubercle	nucleus accumbens	0.775196470028521
LatentSpace_1	348	Olfactory tubercle	nucleus accumbens	0.821560197873195
LatentSpace_1	349	Olfactory tubercle	nucleus accumbens	0.81502853175191
LatentSpace_1	350	Olfactory tubercle	nucleus accumbens	0.798272914507238
LatentSpace_1	351	Olfactory tubercle	nucleus accumbens	0.801802338733665
LatentSpace_1	352	Olfactory tubercle	nucleus accumbens	0.797337196924923
LatentSpace_1	353	Olfactory tubercle	nucleus accumbens	0.794745975818196
LatentSpace_1	354	Olfactory tubercle	nucleus accumbens	0.798294815342001
LatentSpace_1	355	Olfactory tubercle	nucleus accumbens	0.758230571322938
LatentSpace_1	356	Olfactory tubercle	nucleus accumbens	0.756378510250324
LatentSpace_1	357	Olfactory tubercle	nucleus accumbens	0.754187826835272
LatentSpace_1	358	Olfactory tubercle	nucleus accumbens	0.760409534237197
LatentSpace_1	359	Olfactory tubercle	nucleus accumbens	0.754995204603912
LatentSpace_1	360	Olfactory tubercle	nucleus accumbens	0.765581192004212
LatentSpace_1	361	Olfactory tubercle	nucleus accumbens	0.754694138801419
LatentSpace_1	362	Olfactory tubercle	nucleus accumbens	0.794683965279257
LatentSpace_1	363	Olfactory tubercle	nucleus accumbens	0.796004121017755
LatentSpace_1	364	Olfactory tubercle	nucleus accumbens	0.782535938615575
LatentSpace_1	365	Olfactory tubercle	nucleus accumbens	0.771237313208603
LatentSpace_1	366	Olfactory tubercle	nucleus accumbens	0.771287930557331
LatentSpace_1	367	Olfactory tubercle	nucleus accumbens	0.771912899446618
LatentSpace_1	368	Olfactory tubercle	nucleus accumbens	0.771947514035825
LatentSpace_1	369	Olfactory tubercle	nucleus accumbens	0.731376608661755
LatentSpace_1	370	Olfactory tubercle	nucleus accumbens	0.731722409867297
LatentSpace_1	371	Olfactory tubercle	nucleus accumbens	0.729152047248572
LatentSpace_1	372	Olfactory tubercle	nucleus accumbens	0.73480389779895
LatentSpace_1	373	Olfactory tubercle	nucleus accumbens	0.733011371454774
LatentSpace_1	374	Olfactory tubercle	nucleus accumbens	0.727608411110612
LatentSpace_1	375	Olfactory tubercle	nucleus accumbens	0.768481451767193
LatentSpace_1	376	Olfactory tubercle	nucleus accumbens	0.766638680038388
LatentSpace_1	377	Olfactory tubercle	nucleus accumbens	0.753462156876376
LatentSpace_1	378	Olfactory tubercle	nucleus accumbens	0.73454469081536
LatentSpace_1	379	Olfactory tubercle	nucleus accumbens	0.727501114867266
LatentSpace_1	380	Olfactory tubercle	nucleus accumbens	0.738481376238683
LatentSpace_1	381	Olfactory tubercle	nucleus accumbens	0.701615397456668
LatentSpace_1	711	Medial amygdalar nucleus	amygdala	0.77980472771287
LatentSpace_1	722	Medial amygdalar nucleus	amygdala	0.851056770755685
LatentSpace_1	740	Medial amygdalar nucleus	amygdala	0.772265558223569
LatentSpace_1	748	Medial amygdalar nucleus	amygdala	0.815056986069062
LatentSpace_1	766	Medial amygdalar nucleus	amygdala	0.796796899089713
LatentSpace_1	842	Olfactory tubercle	amygdala	0.766657984776067
LatentSpace_1	843	Olfactory tubercle	amygdala	0.780990858992222
LatentSpace_1	844	Olfactory tubercle	amygdala	0.792376361978465
LatentSpace_1	846	Olfactory tubercle	substantia innominata	0.774679427798055
LatentSpace_1	847	Olfactory tubercle	amygdala	0.763619909108063
LatentSpace_1	848	Olfactory tubercle	amygdala	0.767998518973046
LatentSpace_1	854	Olfactory tubercle	nucleus accumbens	0.743570496128436
LatentSpace_1	855	Olfactory tubercle	nucleus accumbens	0.784266117380384
LatentSpace_1	856	Olfactory tubercle	nucleus accumbens	0.788415015812811
LatentSpace_1	857	Olfactory tubercle	nucleus accumbens	0.789462545218698
LatentSpace_1	858	Olfactory tubercle	nucleus accumbens	0.785903203526216
LatentSpace_1	859	Olfactory tubercle	substantia innominata	0.796342731696469
LatentSpace_1	862	Olfactory tubercle	nucleus accumbens	0.78264240399145
LatentSpace_1	863	Olfactory tubercle	nucleus accumbens	0.796464247371388
LatentSpace_1	864	Olfactory tubercle	nucleus accumbens	0.788614644975849
LatentSpace_1	865	Olfactory tubercle	piriform cortex	0.756583921833726
LatentSpace_1	867	Olfactory tubercle	nucleus accumbens	0.768154941203316
LatentSpace_1	868	Olfactory tubercle	nucleus accumbens	0.807945660453494
LatentSpace_1	869	Olfactory tubercle	nucleus accumbens	0.811939550704578
LatentSpace_1	870	Olfactory tubercle	nucleus accumbens	0.810143528142866
LatentSpace_1	871	Olfactory tubercle	nucleus accumbens	0.809865172784841
LatentSpace_1	872	Olfactory tubercle	nucleus accumbens	0.794521987407244
LatentSpace_1	873	Olfactory tubercle	substantia innominata	0.812744093017895
LatentSpace_1	874	Olfactory tubercle	substantia innominata	0.812884855398876
LatentSpace_1	875	Olfactory tubercle	substantia innominata	0.793544612196185
LatentSpace_1	876	Olfactory tubercle	nucleus accumbens	0.798949767062932
LatentSpace_1	878	Olfactory tubercle	nucleus accumbens	0.836935195675105
LatentSpace_1	879	Olfactory tubercle	nucleus accumbens	0.837359604645562
LatentSpace_1	880	Olfactory tubercle	nucleus accumbens	0.797338988719061
LatentSpace_1	881	Olfactory tubercle	nucleus accumbens	0.778949616312409
LatentSpace_1	882	Olfactory tubercle	nucleus accumbens	0.804987673088096
LatentSpace_1	883	Olfactory tubercle	nucleus accumbens	0.800850330790304
LatentSpace_1	884	Olfactory tubercle	nucleus accumbens	0.799206961721176
LatentSpace_1	886	Olfactory tubercle	nucleus accumbens	0.803878038761288
LatentSpace_1	887	Olfactory tubercle	substantia innominata	0.792214947826678
LatentSpace_1	891	Olfactory tubercle	substantia innominata	0.799072561210642
LatentSpace_1	894	Olfactory tubercle	nucleus accumbens	0.823169158622244
LatentSpace_1	895	Olfactory tubercle	nucleus accumbens	0.831830191345896
LatentSpace_1	896	Olfactory tubercle	nucleus accumbens	0.829611028085182
LatentSpace_1	897	Olfactory tubercle	nucleus accumbens	0.808611683151164
LatentSpace_1	898	Olfactory tubercle	nucleus accumbens	0.766953052629103
LatentSpace_1	899	Olfactory tubercle	nucleus accumbens	0.792476715220983
LatentSpace_1	900	Olfactory tubercle	nucleus accumbens	0.793826067213924
LatentSpace_1	901	Olfactory tubercle	nucleus accumbens	0.792870075289901
LatentSpace_1	902	Olfactory tubercle	nucleus accumbens	0.798855548425002
LatentSpace_1	903	Olfactory tubercle	nucleus accumbens	0.796859854274131
LatentSpace_1	904	Olfactory tubercle	nucleus accumbens	0.784139914901327
LatentSpace_1	905	Olfactory tubercle	substantia innominata	0.785592369724922
LatentSpace_1	906	Olfactory tubercle	substantia innominata	0.794862946113712
LatentSpace_1	907	Olfactory tubercle	substantia innominata	0.807528040260004
LatentSpace_1	908	Olfactory tubercle	nucleus accumbens	0.802943827909605
LatentSpace_1	909	Olfactory tubercle	nucleus accumbens	0.80027756293241
LatentSpace_1	910	Olfactory tubercle	nucleus accumbens	0.797151233861706
LatentSpace_1	911	Olfactory tubercle	nucleus accumbens	0.797094488055058
LatentSpace_1	912	Olfactory tubercle	nucleus accumbens	0.801920165888724
LatentSpace_1	913	Olfactory tubercle	nucleus accumbens	0.810605564844893
LatentSpace_1	914	Olfactory tubercle	nucleus accumbens	0.806427457946927
LatentSpace_1	915	Olfactory tubercle	nucleus accumbens	0.794480902632804
LatentSpace_1	916	Olfactory tubercle	nucleus accumbens	0.796772510178207
LatentSpace_1	917	Olfactory tubercle	nucleus accumbens	0.793647042872794
LatentSpace_1	918	Olfactory tubercle	nucleus accumbens	0.790322533745753
LatentSpace_1	919	Olfactory tubercle	nucleus accumbens	0.790204623515559
LatentSpace_1	920	Olfactory tubercle	nucleus accumbens	0.787471569130036
LatentSpace_1	921	Olfactory tubercle	nucleus accumbens	0.783735997797395
LatentSpace_1	922	Olfactory tubercle	nucleus accumbens	0.788811763319684
LatentSpace_1	923	Olfactory tubercle	nucleus accumbens	0.787052281320741
LatentSpace_1	924	Olfactory tubercle	nucleus accumbens	0.801831203827051
LatentSpace_1	925	Olfactory tubercle	nucleus accumbens	0.803929146245942
LatentSpace_1	926	Olfactory tubercle	nucleus accumbens	0.796798170627441
LatentSpace_1	927	Olfactory tubercle	nucleus accumbens	0.783077699355468
LatentSpace_1	928	Olfactory tubercle	nucleus accumbens	0.780557945246847
LatentSpace_1	929	Olfactory tubercle	nucleus accumbens	0.778627625682477
LatentSpace_1	930	Olfactory tubercle	nucleus accumbens	0.780803277497952
LatentSpace_1	931	Olfactory tubercle	nucleus accumbens	0.774378962045051
LatentSpace_1	932	Olfactory tubercle	nucleus accumbens	0.781368810698162
LatentSpace_1	933	Olfactory tubercle	nucleus accumbens	0.782955750656698
LatentSpace_1	934	Olfactory tubercle	nucleus accumbens	0.788600776004779
LatentSpace_1	935	Olfactory tubercle	nucleus accumbens	0.779024950271989
LatentSpace_1	936	Olfactory tubercle	nucleus accumbens	0.775373961597368
LatentSpace_1	937	Olfactory tubercle	nucleus accumbens	0.772739971938999
LatentSpace_1	938	Olfactory tubercle	nucleus accumbens	0.761683151228413
LatentSpace_1	939	Olfactory tubercle	nucleus accumbens	0.739417473682652
LatentSpace_1	940	Olfactory tubercle	nucleus accumbens	0.773251780639221
LatentSpace_1	941	Olfactory tubercle	nucleus accumbens	0.783705293078078
LatentSpace_1	942	Olfactory tubercle	nucleus accumbens	0.784376517795841
LatentSpace_1	943	Olfactory tubercle	nucleus accumbens	0.779153447740588
LatentSpace_1	944	Olfactory tubercle	nucleus accumbens	0.763979532374405
LatentSpace_1	945	Olfactory tubercle	nucleus accumbens	0.748291547536289
LatentSpace_1	946	Olfactory tubercle	nucleus accumbens	0.754654878018937
LatentSpace_1	947	Olfactory tubercle	nucleus accumbens	0.760745390528816
LatentSpace_1	948	Olfactory tubercle	nucleus accumbens	0.75948196765305
LatentSpace_1	949	Olfactory tubercle	nucleus accumbens	0.777897332831568
LatentSpace_1	950	Olfactory tubercle	nucleus accumbens	0.778582022115024
LatentSpace_1	951	Olfactory tubercle	nucleus accumbens	0.775738379833789
LatentSpace_1	952	Olfactory tubercle	nucleus accumbens	0.766601695470459
LatentSpace_1	953	Olfactory tubercle	nucleus accumbens	0.7525700671903
LatentSpace_1	954	Olfactory tubercle	amygdala	0.740726516609312
LatentSpace_1	955	Olfactory tubercle	nucleus accumbens	0.747906516302536
LatentSpace_1	956	Olfactory tubercle	nucleus accumbens	0.75441559952166
LatentSpace_1	957	Olfactory tubercle	nucleus accumbens	0.762801013849291
LatentSpace_1	958	Olfactory tubercle	nucleus accumbens	0.765026493997423
LatentSpace_1	959	Olfactory tubercle	nucleus accumbens	0.753863172320813
LatentSpace_1	960	Olfactory tubercle	nucleus accumbens	0.739384126899911
LatentSpace_1	961	Olfactory tubercle	nucleus accumbens	0.742923574290922
LatentSpace_1	962	Olfactory tubercle	nucleus accumbens	0.736452233222401
LatentSpace_1	963	Olfactory tubercle	nucleus accumbens	0.753460130255357
LatentSpace_1	1329	Medial amygdalar nucleus	amygdala	0.838476560624098
LatentSpace_1	1342	Medial amygdalar nucleus	amygdala	0.850853179318919
LatentSpace_1	1364	Medial amygdalar nucleus	amygdala	0.796054495281438
LatentSpace_1	1433	Medial amygdalar nucleus	amygdala	0.821098195743179
LatentSpace_1	1434	Medial amygdalar nucleus	hypothalamus	0.804596156743802
LatentSpace_1	1447	Medial amygdalar nucleus	amygdala	0.862538876949232
LatentSpace_1	1448	Medial amygdalar nucleus	amygdala	0.876015657307214
LatentSpace_1	1466	Medial amygdalar nucleus	amygdala	0.853947739683685
LatentSpace_1	1467	Medial amygdalar nucleus	amygdala	0.826100987595599
LatentSpace_1	1468	Medial amygdalar nucleus	hypothalamus	0.821501327785854
LatentSpace_1	1480	Medial amygdalar nucleus	amygdala	0.854775419600617
LatentSpace_1	1499	Medial amygdalar nucleus	amygdala	0.841160673039932
LatentSpace_1	1500	Medial amygdalar nucleus	septal nuclei	0.8329841990098
LatentSpace_1	1629	Olfactory tubercle	amygdala	0.751114688103498
LatentSpace_1	1639	Olfactory tubercle	nucleus accumbens	0.74402558732007
LatentSpace_1	1654	Olfactory tubercle	nucleus accumbens	0.740040620758265
LatentSpace_1	1661	Olfactory tubercle	nucleus accumbens	0.728692572887199
LatentSpace_1	1662	Olfactory tubercle	nucleus accumbens	0.763440281662385
LatentSpace_1	1678	Olfactory tubercle	nucleus accumbens	0.80423097990773
LatentSpace_1	1679	Olfactory tubercle	nucleus accumbens	0.761670756949708
LatentSpace_1	1680	Olfactory tubercle	piriform cortex	0.721942642362453
LatentSpace_1	1682	Olfactory tubercle	nucleus accumbens	0.766902683975194
LatentSpace_1	1683	Olfactory tubercle	nucleus accumbens	0.787487251635202
LatentSpace_1	1700	Olfactory tubercle	nucleus accumbens	0.80994701844559
LatentSpace_1	1701	Olfactory tubercle	nucleus accumbens	0.789528760010644
LatentSpace_1	1702	Olfactory tubercle	nucleus accumbens	0.760462280314509
LatentSpace_1	1703	Olfactory tubercle	nucleus accumbens	0.781102499400942
LatentSpace_1	1704	Olfactory tubercle	nucleus accumbens	0.792500102257077
LatentSpace_1	1721	Olfactory tubercle	nucleus accumbens	0.802202965890875
LatentSpace_1	1722	Olfactory tubercle	nucleus accumbens	0.796386858886417
LatentSpace_1	1723	Olfactory tubercle	nucleus accumbens	0.780112262314676
LatentSpace_1	1724	Olfactory tubercle	nucleus accumbens	0.784113726689253
LatentSpace_1	1725	Olfactory tubercle	nucleus accumbens	0.783710853728923
LatentSpace_1	1733	Olfactory tubercle	substantia innominata	0.849857899282749
LatentSpace_1	1742	Olfactory tubercle	nucleus accumbens	0.786262919121684
LatentSpace_1	1743	Olfactory tubercle	nucleus accumbens	0.772456521444132
LatentSpace_1	1744	Olfactory tubercle	nucleus accumbens	0.760322047206678
LatentSpace_1	1745	Olfactory tubercle	nucleus accumbens	0.77467219195996
LatentSpace_1	1746	Olfactory tubercle	nucleus accumbens	0.781180537784212
LatentSpace_1	1747	Olfactory tubercle	nucleus accumbens	0.787771254002468
LatentSpace_1	1750	Olfactory tubercle	nucleus accumbens	0.787823261668512
LatentSpace_1	1751	Olfactory tubercle	nucleus accumbens	0.784893352555672
LatentSpace_1	1752	Olfactory tubercle	substantia innominata	0.772963290586228
LatentSpace_1	1753	Olfactory tubercle	substantia innominata	0.778167897740312
LatentSpace_1	1754	Olfactory tubercle	nucleus accumbens	0.785290964801135
LatentSpace_1	1755	Olfactory tubercle	nucleus accumbens	0.788768336009222
LatentSpace_1	1760	Olfactory tubercle	nucleus accumbens	0.770843157179968
LatentSpace_1	1761	Olfactory tubercle	nucleus accumbens	0.772259378554153
LatentSpace_1	1762	Olfactory tubercle	nucleus accumbens	0.748036353760857
LatentSpace_1	1763	Olfactory tubercle	nucleus accumbens	0.768483452278613
LatentSpace_1	1764	Olfactory tubercle	nucleus accumbens	0.781289003780048
LatentSpace_1	1765	Olfactory tubercle	nucleus accumbens	0.791951817543586
LatentSpace_1	1766	Olfactory tubercle	nucleus accumbens	0.793872505151342
LatentSpace_1	1767	Olfactory tubercle	nucleus accumbens	0.792873590498581
LatentSpace_1	1768	Olfactory tubercle	nucleus accumbens	0.792969689934142
LatentSpace_1	1769	Olfactory tubercle	nucleus accumbens	0.77882782448363
LatentSpace_1	1770	Olfactory tubercle	amygdala	0.764885856528311
LatentSpace_1	1771	Olfactory tubercle	amygdala	0.765731012904076
LatentSpace_1	1772	Olfactory tubercle	nucleus accumbens	0.762161552271655
LatentSpace_1	1773	Olfactory tubercle	nucleus accumbens	0.775989309522122
LatentSpace_1	1774	Olfactory tubercle	nucleus accumbens	0.774766288556456
LatentSpace_1	1775	Olfactory tubercle	nucleus accumbens	0.780785146292859
LatentSpace_1	1776	Olfactory tubercle	nucleus accumbens	0.782770912659107
LatentSpace_1	1777	Olfactory tubercle	nucleus accumbens	0.779814575593061
LatentSpace_1	1778	Olfactory tubercle	nucleus accumbens	0.773933176142925
LatentSpace_1	1779	Olfactory tubercle	nucleus accumbens	0.772396577926512
LatentSpace_1	1780	Olfactory tubercle	nucleus accumbens	0.76359246678829
LatentSpace_1	1781	Olfactory tubercle	nucleus accumbens	0.741575214068947
LatentSpace_1	1782	Olfactory tubercle	nucleus accumbens	0.773130017294111
LatentSpace_1	1783	Olfactory tubercle	nucleus accumbens	0.79081060784091
LatentSpace_1	1784	Olfactory tubercle	nucleus accumbens	0.798948559833814
LatentSpace_1	1785	Olfactory tubercle	nucleus accumbens	0.795895583302371
LatentSpace_1	1786	Olfactory tubercle	nucleus accumbens	0.780749864357459
LatentSpace_1	1787	Olfactory tubercle	nucleus accumbens	0.762566093976412
LatentSpace_1	1788	Olfactory tubercle	nucleus accumbens	0.768539252613449
LatentSpace_1	1789	Olfactory tubercle	nucleus accumbens	0.766688541001109
LatentSpace_1	1790	Olfactory tubercle	nucleus accumbens	0.767726994822331
LatentSpace_1	1791	Olfactory tubercle	nucleus accumbens	0.77002564078368
LatentSpace_1	1792	Olfactory tubercle	nucleus accumbens	0.773451881381252
LatentSpace_1	1793	Olfactory tubercle	nucleus accumbens	0.763834434847494
LatentSpace_1	1794	Olfactory tubercle	nucleus accumbens	0.751712048068312
LatentSpace_1	1795	Olfactory tubercle	nucleus accumbens	0.786888995630546
LatentSpace_1	1796	Olfactory tubercle	nucleus accumbens	0.741734044076052
LatentSpace_1	2272	Medial amygdalar nucleus	amygdala	0.843663781243857
LatentSpace_1	2287	Medial amygdalar nucleus	amygdala	0.869297218413393
LatentSpace_1	2288	Medial amygdalar nucleus	amygdala	0.889188131083263
LatentSpace_1	2308	Medial amygdalar nucleus	amygdala	0.881262287660001
LatentSpace_1	2309	Medial amygdalar nucleus	amygdala	0.867935299201653
LatentSpace_1	2310	Medial amygdalar nucleus	amygdala	0.824635396930381
LatentSpace_1	2311	Medial amygdalar nucleus	amygdala	0.750081563179381
LatentSpace_1	2325	Medial amygdalar nucleus	amygdala	0.806126739546984
LatentSpace_1	2326	Medial amygdalar nucleus	amygdala	0.861094599626409
LatentSpace_1	2327	Medial amygdalar nucleus	amygdala	0.877855605262066
LatentSpace_1	2328	Medial amygdalar nucleus	amygdala	0.88284059053527
LatentSpace_1	2348	Medial amygdalar nucleus	amygdala	0.860877408279668
LatentSpace_1	2349	Medial amygdalar nucleus	amygdala	0.833395837345445
LatentSpace_1	2350	Medial amygdalar nucleus	amygdala	0.792777120033738
LatentSpace_1	2363	Medial amygdalar nucleus	amygdala	0.815240191795234
LatentSpace_1	2364	Medial amygdalar nucleus	amygdala	0.858584953484549
LatentSpace_1	2365	Medial amygdalar nucleus	amygdala	0.86640574957677
LatentSpace_1	2366	Medial amygdalar nucleus	amygdala	0.871340358124502
LatentSpace_1	2368	Medial amygdalar nucleus	amygdala	0.874647934571421
LatentSpace_1	2385	Medial amygdalar nucleus	amygdala	0.885347512109318
LatentSpace_1	2386	Medial amygdalar nucleus	amygdala	0.869692544732115
LatentSpace_1	2405	Medial amygdalar nucleus	amygdala	0.881480277602651
LatentSpace_1	2406	Medial amygdalar nucleus	amygdala	0.8796616843725
LatentSpace_1	2407	Medial amygdalar nucleus	amygdala	0.875095110731882
LatentSpace_1	2425	Medial amygdalar nucleus	amygdala	0.863315041048322
LatentSpace_1	2426	Medial amygdalar nucleus	amygdala	0.834818508834014
LatentSpace_1	2427	Medial amygdalar nucleus	hypothalamus	0.827065672362496
LatentSpace_1	2440	Medial amygdalar nucleus	amygdala	0.869938609328303
LatentSpace_1	2441	Medial amygdalar nucleus	amygdala	0.882446737629025
LatentSpace_1	2460	Medial amygdalar nucleus	amygdala	0.862112279845368
LatentSpace_1	2461	Medial amygdalar nucleus	amygdala	0.837452589556182
LatentSpace_1	2474	Medial amygdalar nucleus	amygdala	0.857751612697332
LatentSpace_1	2475	Medial amygdalar nucleus	amygdala	0.873476751650676
LatentSpace_1	2494	Medial amygdalar nucleus	amygdala	0.865827698433729
LatentSpace_1	2495	Medial amygdalar nucleus	amygdala	0.847540135338204
LatentSpace_1	2508	Medial amygdalar nucleus	amygdala	0.85736000870278
LatentSpace_1	2509	Medial amygdalar nucleus	amygdala	0.867094885356012
LatentSpace_1	2710	Olfactory tubercle	piriform cortex	0.70405587846895
LatentSpace_1	2736	Olfactory tubercle	nucleus accumbens	0.739696199525946
LatentSpace_1	2738	Olfactory tubercle	claustrum	0.753430588105917
LatentSpace_1	2739	Olfactory tubercle	claustrum	0.702669311141294
LatentSpace_1	2740	Olfactory tubercle	nucleus accumbens	0.749516567864784
LatentSpace_1	2744	Nucleus accumbens	nucleus accumbens	0.806017094218055
LatentSpace_1	2757	Nucleus accumbens	nucleus accumbens	0.801322533210901
LatentSpace_1	2761	Olfactory tubercle	nucleus accumbens	0.752430025952325
LatentSpace_1	2762	Olfactory tubercle	nucleus accumbens	0.709469309890052
LatentSpace_1	2763	Olfactory tubercle	nucleus accumbens	0.736109096276277
LatentSpace_1	2764	Olfactory tubercle	nucleus accumbens	0.753873478863133
LatentSpace_1	2767	Nucleus accumbens	nucleus accumbens	0.808497704076028
LatentSpace_1	2768	Nucleus accumbens	nucleus accumbens	0.798952240493681
LatentSpace_1	2769	Nucleus accumbens	nucleus accumbens	0.78302271262422
LatentSpace_1	2780	Nucleus accumbens	nucleus accumbens	0.810407644752388
LatentSpace_1	2781	Nucleus accumbens	nucleus accumbens	0.805334651393075
LatentSpace_1	2785	Olfactory tubercle	nucleus accumbens	0.745748219832743
LatentSpace_1	2786	Olfactory tubercle	nucleus accumbens	0.718158288829191
LatentSpace_1	2787	Olfactory tubercle	nucleus accumbens	0.719579937755088
LatentSpace_1	2788	Olfactory tubercle	nucleus accumbens	0.73918250822834
LatentSpace_1	2789	Olfactory tubercle	nucleus accumbens	0.755435738670308
LatentSpace_1	2793	Nucleus accumbens	nucleus accumbens	0.790088413454546
LatentSpace_1	2794	Nucleus accumbens	substantia innominata	0.781600634888979
LatentSpace_1	2798	Olfactory tubercle	substantia innominata	0.842334004986441
LatentSpace_1	2800	Olfactory tubercle	substantia innominata	0.820420948059249
LatentSpace_1	2803	Nucleus accumbens	nucleus accumbens	0.804288554001869
LatentSpace_1	2804	Nucleus accumbens	nucleus accumbens	0.804746172870359
LatentSpace_1	2808	Olfactory tubercle	nucleus accumbens	0.749758813643948
LatentSpace_1	2809	Olfactory tubercle	nucleus accumbens	0.720433765883261
LatentSpace_1	2810	Olfactory tubercle	nucleus accumbens	0.69138831725472
LatentSpace_1	2811	Olfactory tubercle	nucleus accumbens	0.719645752975928
LatentSpace_1	2812	Olfactory tubercle	nucleus accumbens	0.753397862334478
LatentSpace_1	2813	Olfactory tubercle	nucleus accumbens	0.76334539430727
LatentSpace_1	2819	Nucleus accumbens	nucleus accumbens	0.79061753517251
LatentSpace_1	2820	Olfactory tubercle	septal nuclei	0.784066235306853
LatentSpace_1	2821	Olfactory tubercle	substantia innominata	0.783907139643057
LatentSpace_1	2828	Olfactory tubercle	nucleus accumbens	0.759900852701338
LatentSpace_1	2829	Olfactory tubercle	nucleus accumbens	0.73743044356987
LatentSpace_1	2830	Olfactory tubercle	nucleus accumbens	0.704250906068286
LatentSpace_1	2831	Olfactory tubercle	nucleus accumbens	0.722081729336752
LatentSpace_1	2832	Olfactory tubercle	nucleus accumbens	0.751155334020802
LatentSpace_1	2833	Olfactory tubercle	nucleus accumbens	0.765851715833751
LatentSpace_1	2834	Olfactory tubercle	nucleus accumbens	0.780091573337875
LatentSpace_1	2835	Olfactory tubercle	nucleus accumbens	0.795300348578964
LatentSpace_1	2839	Olfactory tubercle	nucleus accumbens	0.779562182465964
LatentSpace_1	2840	Olfactory tubercle	nucleus accumbens	0.785961052910055
LatentSpace_1	2841	Olfactory tubercle	nucleus accumbens	0.778462626477459
LatentSpace_1	2845	Olfactory tubercle	nucleus accumbens	0.782030996740323
LatentSpace_1	2846	Olfactory tubercle	nucleus accumbens	0.768629658742025
LatentSpace_1	2847	Olfactory tubercle	nucleus accumbens	0.746395781957554
LatentSpace_1	2848	Olfactory tubercle	nucleus accumbens	0.761845301224079
LatentSpace_1	2849	Olfactory tubercle	nucleus accumbens	0.788799554977962
LatentSpace_1	2850	Olfactory tubercle	nucleus accumbens	0.798911384351344
LatentSpace_1	2851	Olfactory tubercle	nucleus accumbens	0.797030994080784
LatentSpace_1	2852	Olfactory tubercle	nucleus accumbens	0.787375207360189
LatentSpace_1	2853	Olfactory tubercle	nucleus accumbens	0.776624367396033
LatentSpace_1	2854	Olfactory tubercle	nucleus accumbens	0.75544486509541
LatentSpace_1	2855	Olfactory tubercle	nucleus accumbens	0.774811147468851
LatentSpace_1	2856	Olfactory tubercle	nucleus accumbens	0.783061361840701
LatentSpace_1	2857	Olfactory tubercle	nucleus accumbens	0.790868209876417
LatentSpace_1	2858	Olfactory tubercle	nucleus accumbens	0.791940763349693
LatentSpace_1	2859	Olfactory tubercle	nucleus accumbens	0.798415814530327
LatentSpace_1	2860	Olfactory tubercle	nucleus accumbens	0.800497507746231
LatentSpace_1	2861	Olfactory tubercle	nucleus accumbens	0.759964953260509
LatentSpace_1	2862	Olfactory tubercle	nucleus accumbens	0.747285230270477
LatentSpace_1	2863	Olfactory tubercle	nucleus accumbens	0.718562216346834
LatentSpace_1	2864	Olfactory tubercle	nucleus accumbens	0.745908919670734
LatentSpace_1	2865	Olfactory tubercle	nucleus accumbens	0.768104461251197
LatentSpace_1	3485	Medial amygdalar nucleus	amygdala	0.894762313427636
LatentSpace_1	3486	Medial amygdalar nucleus	amygdala	0.839138469332496
LatentSpace_1	3487	Medial amygdalar nucleus	hypothalamus	0.831982680101068
LatentSpace_1	3498	Medial amygdalar nucleus	amygdala	0.869750712425146
LatentSpace_1	3499	Medial amygdalar nucleus	amygdala	0.901925476080835
LatentSpace_1	3500	Medial amygdalar nucleus	amygdala	0.911078004765866
LatentSpace_1	3501	Medial amygdalar nucleus	amygdala	0.911781881249493
LatentSpace_1	3522	Medial amygdalar nucleus	amygdala	0.892358018158407
LatentSpace_1	3523	Medial amygdalar nucleus	amygdala	0.887301077178288
LatentSpace_1	3524	Medial amygdalar nucleus	amygdala	0.861813375932202
LatentSpace_1	3525	Medial amygdalar nucleus	amygdala	0.809336720915477
LatentSpace_1	3537	Medial amygdalar nucleus	amygdala	0.853774851394362
LatentSpace_1	3538	Medial amygdalar nucleus	amygdala	0.887661549335323
LatentSpace_1	3539	Medial amygdalar nucleus	amygdala	0.893123562552299
LatentSpace_1	3540	Medial amygdalar nucleus	amygdala	0.89089389904729
LatentSpace_1	3560	Medial amygdalar nucleus	amygdala	0.885273667412478
LatentSpace_1	3561	Medial amygdalar nucleus	amygdala	0.879278647317855
LatentSpace_1	3562	Medial amygdalar nucleus	amygdala	0.867126738591121
LatentSpace_1	3563	Medial amygdalar nucleus	amygdala	0.837641111455644
LatentSpace_1	3564	Medial amygdalar nucleus	amygdala	0.801910149967687
LatentSpace_1	3576	Medial amygdalar nucleus	amygdala	0.829364383575939
LatentSpace_1	3577	Medial amygdalar nucleus	amygdala	0.870436516668358
LatentSpace_1	3578	Medial amygdalar nucleus	amygdala	0.876946026924765
LatentSpace_1	3579	Medial amygdalar nucleus	amygdala	0.876550709869464
LatentSpace_1	3580	Medial amygdalar nucleus	amygdala	0.87942994853678
LatentSpace_1	3598	Medial amygdalar nucleus	amygdala	0.893215650175601
LatentSpace_1	3599	Medial amygdalar nucleus	amygdala	0.886221186088824
LatentSpace_1	3600	Medial amygdalar nucleus	amygdala	0.868339922461858
LatentSpace_1	3601	Medial amygdalar nucleus	amygdala	0.838726629054731
LatentSpace_1	3614	Medial amygdalar nucleus	amygdala	0.873857684343129
LatentSpace_1	3615	Medial amygdalar nucleus	amygdala	0.876075939460924
LatentSpace_1	3616	Medial amygdalar nucleus	amygdala	0.877072995479501
LatentSpace_1	3617	Medial amygdalar nucleus	amygdala	0.876042282257371
LatentSpace_1	3635	Medial amygdalar nucleus	amygdala	0.883791159360367
LatentSpace_1	3636	Medial amygdalar nucleus	amygdala	0.861077731961291
LatentSpace_1	3637	Medial amygdalar nucleus	amygdala	0.82495134773973
LatentSpace_1	3651	Medial amygdalar nucleus	amygdala	0.862501486697113
LatentSpace_1	3652	Medial amygdalar nucleus	amygdala	0.877550658898254
LatentSpace_1	3653	Medial amygdalar nucleus	amygdala	0.88403488064638
LatentSpace_1	3673	Medial amygdalar nucleus	amygdala	0.859314541054048
LatentSpace_1	3674	Medial amygdalar nucleus	amygdala	0.827331393896072
LatentSpace_1	3690	Medial amygdalar nucleus	amygdala	0.851994072503359
LatentSpace_1	3691	Medial amygdalar nucleus	amygdala	0.872426793250061
LatentSpace_1	3711	Medial amygdalar nucleus	amygdala	0.838959581985628
LatentSpace_1	3730	Medial amygdalar nucleus	amygdala	0.842479305692752
LatentSpace_1	3931	Nucleus accumbens	nucleus accumbens	0.7672109370098
LatentSpace_1	3932	Nucleus accumbens	nucleus accumbens	0.792206882112751
LatentSpace_1	3933	Nucleus accumbens	nucleus accumbens	0.770774093827783
LatentSpace_1	3953	Nucleus accumbens	nucleus accumbens	0.845148303526801
LatentSpace_1	3965	Nucleus accumbens	nucleus accumbens	0.80606043708498
LatentSpace_1	3966	Nucleus accumbens	nucleus accumbens	0.847760934273287
LatentSpace_1	3967	Nucleus accumbens	nucleus accumbens	0.841777197315553
LatentSpace_1	3968	Nucleus accumbens	nucleus accumbens	0.81734273234923
LatentSpace_1	3985	Nucleus accumbens	nucleus accumbens	0.859706970326889
LatentSpace_1	3986	Nucleus accumbens	nucleus accumbens	0.864138440075629
LatentSpace_1	3987	Nucleus accumbens	nucleus accumbens	0.847061071138393
LatentSpace_1	3997	Nucleus accumbens	nucleus accumbens	0.845635251639756
LatentSpace_1	3998	Nucleus accumbens	nucleus accumbens	0.865111643008142
LatentSpace_1	3999	Nucleus accumbens	nucleus accumbens	0.856915664178799
LatentSpace_1	4000	Nucleus accumbens	nucleus accumbens	0.830809016030058
LatentSpace_1	4001	Nucleus accumbens	substantia innominata	0.802737020590809
LatentSpace_1	4015	Nucleus accumbens	nucleus accumbens	0.846319572846371
LatentSpace_1	4016	Nucleus accumbens	nucleus accumbens	0.859519289829824
LatentSpace_1	4017	Nucleus accumbens	nucleus accumbens	0.856240751687503
LatentSpace_1	4018	Nucleus accumbens	nucleus accumbens	0.828499142160441
LatentSpace_1	4020	Olfactory tubercle	piriform cortex	0.692734741814927
LatentSpace_1	4026	Nucleus accumbens	nucleus accumbens	0.837964388964251
LatentSpace_1	4027	Nucleus accumbens	nucleus accumbens	0.841291828076661
LatentSpace_1	4028	Nucleus accumbens	nucleus accumbens	0.82817977689632
LatentSpace_1	4029	Nucleus accumbens	nucleus accumbens	0.808187459604909
LatentSpace_1	4030	Nucleus accumbens	nucleus accumbens	0.78822055998565
LatentSpace_1	4041	Nucleus accumbens	nucleus accumbens	0.816671993912511
LatentSpace_1	4042	Nucleus accumbens	nucleus accumbens	0.83696877441697
LatentSpace_1	4043	Nucleus accumbens	nucleus accumbens	0.838153943180924
LatentSpace_1	4044	Nucleus accumbens	nucleus accumbens	0.831294691177946
LatentSpace_1	4045	Nucleus accumbens	nucleus accumbens	0.821999328963763
LatentSpace_1	4048	Olfactory tubercle	piriform cortex	0.696444016167193
LatentSpace_1	4049	Olfactory tubercle	piriform cortex	0.67846488707882
LatentSpace_1	4050	Olfactory tubercle	nucleus accumbens	0.672750207652705
LatentSpace_1	4051	Olfactory tubercle	nucleus accumbens	0.730879543338506
LatentSpace_1	4052	Nucleus accumbens	nucleus accumbens	0.789645727588324
LatentSpace_1	4053	Nucleus accumbens	nucleus accumbens	0.816703209205427
LatentSpace_1	4054	Nucleus accumbens	nucleus accumbens	0.827529433997905
LatentSpace_1	4055	Nucleus accumbens	nucleus accumbens	0.811198751171027
LatentSpace_1	4056	Nucleus accumbens	nucleus accumbens	0.798497088052877
LatentSpace_1	4057	Nucleus accumbens	nucleus accumbens	0.791800406718092
LatentSpace_1	4058	Nucleus accumbens	substantia innominata	0.803884353842352
LatentSpace_1	4063	Nucleus accumbens	substantia innominata	0.79748979979529
LatentSpace_1	4064	Nucleus accumbens	nucleus accumbens	0.804103583123855
LatentSpace_1	4065	Nucleus accumbens	nucleus accumbens	0.823352057114793
LatentSpace_1	4066	Nucleus accumbens	nucleus accumbens	0.838400682656733
LatentSpace_1	4067	Nucleus accumbens	nucleus accumbens	0.834364985216213
LatentSpace_1	4068	Nucleus accumbens	nucleus accumbens	0.811577584243152
LatentSpace_1	4070	Olfactory tubercle	nucleus accumbens	0.711437056611392
LatentSpace_1	4071	Olfactory tubercle	piriform cortex	0.704346281967901
LatentSpace_1	4074	Olfactory tubercle	nucleus accumbens	0.701772892303854
LatentSpace_1	4077	Nucleus accumbens	nucleus accumbens	0.807936224093076
LatentSpace_1	4078	Nucleus accumbens	nucleus accumbens	0.820366187623196
LatentSpace_1	4079	Nucleus accumbens	nucleus accumbens	0.815304634074973
LatentSpace_1	4080	Nucleus accumbens	nucleus accumbens	0.817785963483281
LatentSpace_1	4081	Nucleus accumbens	nucleus accumbens	0.815071558989665
LatentSpace_1	4082	Olfactory tubercle	nucleus accumbens	0.807395028314348
LatentSpace_1	4083	Olfactory tubercle	septal nuclei	0.826633081541663
LatentSpace_1	4084	Olfactory tubercle	substantia innominata	0.804988994413457
LatentSpace_1	4085	Olfactory tubercle	nucleus accumbens	0.791511295321415
LatentSpace_1	4086	Nucleus accumbens	nucleus accumbens	0.797517136899224
LatentSpace_1	4087	Nucleus accumbens	nucleus accumbens	0.79891120268974
LatentSpace_1	4088	Nucleus accumbens	nucleus accumbens	0.808465582635646
LatentSpace_1	4089	Nucleus accumbens	nucleus accumbens	0.817388941158122
LatentSpace_1	4090	Nucleus accumbens	nucleus accumbens	0.802197781170931
LatentSpace_1	4091	Nucleus accumbens	nucleus accumbens	0.76161382747584
LatentSpace_1	4092	Olfactory tubercle	nucleus accumbens	0.720054799313844
LatentSpace_1	4093	Olfactory tubercle	piriform cortex	0.695596244920437
LatentSpace_1	4094	Olfactory tubercle	piriform cortex	0.70787018114854
LatentSpace_1	4095	Olfactory tubercle	nucleus accumbens	0.67364649754042
LatentSpace_1	4096	Olfactory tubercle	nucleus accumbens	0.718285139892483
LatentSpace_1	4097	Olfactory tubercle	nucleus accumbens	0.749215894661749
LatentSpace_1	4099	Nucleus accumbens	nucleus accumbens	0.797853560071693
LatentSpace_1	4100	Nucleus accumbens	nucleus accumbens	0.809167471284437
LatentSpace_1	4101	Nucleus accumbens	nucleus accumbens	0.813400366435846
LatentSpace_1	4102	Nucleus accumbens	nucleus accumbens	0.811256339285609
LatentSpace_1	4103	Nucleus accumbens	nucleus accumbens	0.795758324976612
LatentSpace_1	4104	Olfactory tubercle	septal nuclei	0.782541030779331
LatentSpace_1	4105	Olfactory tubercle	nucleus accumbens	0.780786907421447
LatentSpace_1	4106	Olfactory tubercle	nucleus accumbens	0.798131235046679
LatentSpace_1	4107	Nucleus accumbens	nucleus accumbens	0.790263329570826
LatentSpace_1	4108	Nucleus accumbens	nucleus accumbens	0.786021498037607
LatentSpace_1	4109	Nucleus accumbens	nucleus accumbens	0.782715302894044
LatentSpace_1	4112	Olfactory tubercle	nucleus accumbens	0.739785071714903
LatentSpace_1	4113	Olfactory tubercle	nucleus accumbens	0.701665292262653
LatentSpace_1	4114	Olfactory tubercle	piriform cortex	0.688072365267414
LatentSpace_1	4115	Olfactory tubercle	nucleus accumbens	0.706829207113914
LatentSpace_1	4116	Olfactory tubercle	nucleus accumbens	0.748453303630433
LatentSpace_1	4117	Olfactory tubercle	nucleus accumbens	0.782267480812796
LatentSpace_1	4118	Olfactory tubercle	nucleus accumbens	0.790489332191533
LatentSpace_1	4119	Olfactory tubercle	nucleus accumbens	0.791494456808164
LatentSpace_1	4120	Nucleus accumbens	nucleus accumbens	0.788517771421765
LatentSpace_1	4122	Olfactory tubercle	nucleus accumbens	0.75593781770247
LatentSpace_1	4123	Olfactory tubercle	septal nuclei	0.728658738292046
LatentSpace_1	4124	Olfactory tubercle	nucleus accumbens	0.756065169797348
LatentSpace_1	4125	Olfactory tubercle	nucleus accumbens	0.7690832556966
LatentSpace_1	4126	Olfactory tubercle	nucleus accumbens	0.77250871773471
LatentSpace_1	4128	Olfactory tubercle	nucleus accumbens	0.779663279777593
LatentSpace_1	4129	Olfactory tubercle	nucleus accumbens	0.783689175615828
LatentSpace_1	4130	Olfactory tubercle	nucleus accumbens	0.772950511824213
LatentSpace_1	4131	Olfactory tubercle	nucleus accumbens	0.724779645433187
LatentSpace_1	4132	Olfactory tubercle	nucleus accumbens	0.670467525546493
LatentSpace_1	4133	Olfactory tubercle	nucleus accumbens	0.77457142548775
LatentSpace_1	4134	Olfactory tubercle	nucleus accumbens	0.773197557526205
LatentSpace_1	4135	Olfactory tubercle	piriform cortex	0.764998201799833
LatentSpace_1	4136	Olfactory tubercle	piriform cortex	0.759173298152208
LatentSpace_1	4137	Olfactory tubercle	piriform cortex	0.735432416346661
LatentSpace_1	4138	Olfactory tubercle	piriform cortex	0.719733828845598
LatentSpace_1	4139	Olfactory tubercle	piriform cortex	0.752185031799631
LatentSpace_1	4140	Olfactory tubercle	piriform cortex	0.757263688909495
LatentSpace_1	4141	Olfactory tubercle	nucleus accumbens	0.734391614411495
LatentSpace_1	4142	Olfactory tubercle	nucleus accumbens	0.748105791096511
LatentSpace_1	4143	Olfactory tubercle	piriform cortex	0.777655239601338
LatentSpace_1	4144	Olfactory tubercle	piriform cortex	0.802703143456907
LatentSpace_1	4145	Olfactory tubercle	piriform cortex	0.793412162710821
LatentSpace_1	4146	Olfactory tubercle	piriform cortex	0.761287601048652
LatentSpace_1	4147	Olfactory tubercle	piriform cortex	0.709881480982269
LatentSpace_1	4148	Olfactory tubercle	piriform cortex	0.737429326436571
LatentSpace_1	4149	Olfactory tubercle	piriform cortex	0.76970923278849
LatentSpace_1	4150	Olfactory tubercle	piriform cortex	0.771657731036503
LatentSpace_1	4919	Medial amygdalar nucleus	amygdala	0.9055118918593
LatentSpace_1	4920	Medial amygdalar nucleus	amygdala	0.911282152301785
LatentSpace_1	4921	Medial amygdalar nucleus	amygdala	0.912572418034509
LatentSpace_1	4922	Medial amygdalar nucleus	amygdala	0.896044408818839
LatentSpace_1	4923	Medial amygdalar nucleus	amygdala	0.844969115676862
LatentSpace_1	4938	Medial amygdalar nucleus	amygdala	0.892028799926132
LatentSpace_1	4939	Medial amygdalar nucleus	amygdala	0.907274848761891
LatentSpace_1	4940	Medial amygdalar nucleus	amygdala	0.908627335577499
LatentSpace_1	4941	Medial amygdalar nucleus	amygdala	0.905285582740344
LatentSpace_1	4960	Medial amygdalar nucleus	amygdala	0.893678381406672
LatentSpace_1	4961	Medial amygdalar nucleus	amygdala	0.897048192570119
LatentSpace_1	4962	Medial amygdalar nucleus	amygdala	0.895399662590487
LatentSpace_1	4963	Medial amygdalar nucleus	amygdala	0.870638945844093
LatentSpace_1	4964	Medial amygdalar nucleus	amygdala	0.803044613425792
LatentSpace_1	4979	Medial amygdalar nucleus	amygdala	0.893111089969948
LatentSpace_1	4980	Medial amygdalar nucleus	amygdala	0.901052568722117
LatentSpace_1	4981	Medial amygdalar nucleus	amygdala	0.894158319612445
LatentSpace_1	4982	Medial amygdalar nucleus	amygdala	0.895389617154178
LatentSpace_1	5002	Medial amygdalar nucleus	amygdala	0.880054802888131
LatentSpace_1	5003	Medial amygdalar nucleus	amygdala	0.867968211435889
LatentSpace_1	5004	Medial amygdalar nucleus	amygdala	0.817287115248968
LatentSpace_1	5022	Medial amygdalar nucleus	amygdala	0.88823192149665
LatentSpace_1	5023	Medial amygdalar nucleus	amygdala	0.877270418392378
LatentSpace_1	5024	Medial amygdalar nucleus	amygdala	0.880565344280687
LatentSpace_1	5043	Medial amygdalar nucleus	amygdala	0.889391372566612
LatentSpace_1	5044	Medial amygdalar nucleus	amygdala	0.88184619516916
LatentSpace_1	5045	Medial amygdalar nucleus	amygdala	0.865998736317251
LatentSpace_1	5059	Medial amygdalar nucleus	amygdala	0.876805851660549
LatentSpace_1	5060	Medial amygdalar nucleus	amygdala	0.8752878001952
LatentSpace_1	5061	Medial amygdalar nucleus	amygdala	0.879524168516436
LatentSpace_1	5080	Medial amygdalar nucleus	amygdala	0.88453578144426
LatentSpace_1	5081	Medial amygdalar nucleus	amygdala	0.862572014173076
LatentSpace_1	5082	Medial amygdalar nucleus	amygdala	0.810630080769615
LatentSpace_1	5097	Medial amygdalar nucleus	amygdala	0.876182609586406
LatentSpace_1	5098	Medial amygdalar nucleus	amygdala	0.884473285680952
LatentSpace_1	5118	Medial amygdalar nucleus	amygdala	0.858330120905517
LatentSpace_1	5119	Medial amygdalar nucleus	amygdala	0.82536931892112
LatentSpace_1	5135	Medial amygdalar nucleus	substantia innominata	0.843912764709622
LatentSpace_1	5136	Medial amygdalar nucleus	amygdala	0.840901184701831
LatentSpace_1	5137	Medial amygdalar nucleus	amygdala	0.866533308949286
LatentSpace_1	5276	Fundus of striatum	amygdala	0.757001362129205
LatentSpace_1	5300	Fundus of striatum	substantia innominata	0.796318778355057
LatentSpace_1	5301	Fundus of striatum	amygdala	0.794744085465583
LatentSpace_1	5314	Fundus of striatum	nucleus accumbens	0.758593994186429
LatentSpace_1	5315	Fundus of striatum	nucleus accumbens	0.777724989505752
LatentSpace_1	5338	Fundus of striatum	nucleus accumbens	0.831746159581225
LatentSpace_1	5339	Fundus of striatum	nucleus accumbens	0.805472113010857
LatentSpace_1	5353	Fundus of striatum	nucleus accumbens	0.812897964137469
LatentSpace_1	5354	Nucleus accumbens	nucleus accumbens	0.803277297544985
LatentSpace_1	5375	Nucleus accumbens	nucleus accumbens	0.875197801237989
LatentSpace_1	5376	Nucleus accumbens	nucleus accumbens	0.867897026658705
LatentSpace_1	5377	Nucleus accumbens	nucleus accumbens	0.788316251557876
LatentSpace_1	5390	Nucleus accumbens	nucleus accumbens	0.822465563431801
LatentSpace_1	5391	Nucleus accumbens	nucleus accumbens	0.842548069536629
LatentSpace_1	5392	Nucleus accumbens	nucleus accumbens	0.82779927342281
LatentSpace_1	5411	Nucleus accumbens	nucleus accumbens	0.883268950837845
LatentSpace_1	5412	Nucleus accumbens	nucleus accumbens	0.889960739733059
LatentSpace_1	5413	Nucleus accumbens	nucleus accumbens	0.865425673449724
LatentSpace_1	5426	Nucleus accumbens	nucleus accumbens	0.84104544947687
LatentSpace_1	5427	Nucleus accumbens	nucleus accumbens	0.883168970514876
LatentSpace_1	5428	Nucleus accumbens	nucleus accumbens	0.881431974805942
LatentSpace_1	5429	Nucleus accumbens	nucleus accumbens	0.860144270685599
LatentSpace_1	5430	Nucleus accumbens	nucleus accumbens	0.836349066859526
LatentSpace_1	5446	Nucleus accumbens	nucleus accumbens	0.898951643990385
LatentSpace_1	5447	Nucleus accumbens	nucleus accumbens	0.90468240981647
LatentSpace_1	5448	Nucleus accumbens	nucleus accumbens	0.892848843265748
LatentSpace_1	5449	Nucleus accumbens	nucleus accumbens	0.842853782770142
LatentSpace_1	5461	Nucleus accumbens	nucleus accumbens	0.827981909662685
LatentSpace_1	5462	Nucleus accumbens	nucleus accumbens	0.891048928857592
LatentSpace_1	5463	Nucleus accumbens	nucleus accumbens	0.903794833829374
LatentSpace_1	5464	Nucleus accumbens	nucleus accumbens	0.895174517323522
LatentSpace_1	5465	Nucleus accumbens	nucleus accumbens	0.871869138865043
LatentSpace_1	5466	Nucleus accumbens	nucleus accumbens	0.854202570651708
LatentSpace_1	5479	Nucleus accumbens	nucleus accumbens	0.874775414410402
LatentSpace_1	5480	Nucleus accumbens	nucleus accumbens	0.883048173362136
LatentSpace_1	5481	Nucleus accumbens	nucleus accumbens	0.893573922681588
LatentSpace_1	5482	Nucleus accumbens	nucleus accumbens	0.890141712402398
LatentSpace_1	5483	Nucleus accumbens	nucleus accumbens	0.866651926659065
LatentSpace_1	5484	Nucleus accumbens	nucleus accumbens	0.792770385262528
LatentSpace_1	5494	Nucleus accumbens	nucleus accumbens	0.83410133925624
LatentSpace_1	5495	Nucleus accumbens	nucleus accumbens	0.870902897775626
LatentSpace_1	5496	Nucleus accumbens	nucleus accumbens	0.872412136091937
LatentSpace_1	5497	Nucleus accumbens	nucleus accumbens	0.856490359897739
LatentSpace_1	5498	Nucleus accumbens	nucleus accumbens	0.839081196866732
LatentSpace_1	5499	Nucleus accumbens	nucleus accumbens	0.83126964869708
LatentSpace_1	5500	Nucleus accumbens	nucleus accumbens	0.823313314061882
LatentSpace_1	5501	Nucleus accumbens	substantia innominata	0.825015234601446
LatentSpace_1	5509	Nucleus accumbens	nucleus accumbens	0.815394052992143
LatentSpace_1	5510	Nucleus accumbens	nucleus accumbens	0.842075019359539
LatentSpace_1	5511	Nucleus accumbens	nucleus accumbens	0.86777558435491
LatentSpace_1	5512	Nucleus accumbens	nucleus accumbens	0.873364395434265
LatentSpace_1	5513	Nucleus accumbens	nucleus accumbens	0.867160565511495
LatentSpace_1	5514	Nucleus accumbens	nucleus accumbens	0.848357619872316
LatentSpace_1	5526	Nucleus accumbens	nucleus accumbens	0.820126418236143
LatentSpace_1	5527	Nucleus accumbens	nucleus accumbens	0.850494790477445
LatentSpace_1	5528	Nucleus accumbens	nucleus accumbens	0.846732149468419
LatentSpace_1	5529	Nucleus accumbens	nucleus accumbens	0.833071300703746
LatentSpace_1	5530	Nucleus accumbens	nucleus accumbens	0.82665699161688
LatentSpace_1	5531	Nucleus accumbens	nucleus accumbens	0.825425442583699
LatentSpace_1	5532	Nucleus accumbens	nucleus accumbens	0.809370225835682
LatentSpace_1	5533	Nucleus accumbens	septal nuclei	0.825427703783945
LatentSpace_1	5538	Nucleus accumbens	substantia innominata	0.806737866280191
LatentSpace_1	5539	Nucleus accumbens	nucleus accumbens	0.806884067136815
LatentSpace_1	5540	Nucleus accumbens	nucleus accumbens	0.824797589219782
LatentSpace_1	5541	Nucleus accumbens	nucleus accumbens	0.85480367596289
LatentSpace_1	5542	Nucleus accumbens	nucleus accumbens	0.870813394477022
LatentSpace_1	5543	Nucleus accumbens	nucleus accumbens	0.859270274435152
LatentSpace_1	5544	Nucleus accumbens	nucleus accumbens	0.830715303810605
LatentSpace_1	5545	Nucleus accumbens	nucleus accumbens	0.773507661186204
LatentSpace_1	5555	Nucleus accumbens	nucleus accumbens	0.796375840247372
LatentSpace_1	5556	Nucleus accumbens	nucleus accumbens	0.830636091060506
LatentSpace_1	5557	Nucleus accumbens	nucleus accumbens	0.841969608397036
LatentSpace_1	5558	Nucleus accumbens	nucleus accumbens	0.841483312860179
LatentSpace_1	5559	Nucleus accumbens	nucleus accumbens	0.839382805586947
LatentSpace_1	5560	Nucleus accumbens	nucleus accumbens	0.831224720738103
LatentSpace_1	5561	Nucleus accumbens	nucleus accumbens	0.811332860401197
LatentSpace_1	5564	Nucleus accumbens	nucleus accumbens	0.800406926906024
LatentSpace_1	5565	Nucleus accumbens	nucleus accumbens	0.811390309301775
LatentSpace_1	5566	Nucleus accumbens	nucleus accumbens	0.818514556048338
LatentSpace_1	5567	Nucleus accumbens	nucleus accumbens	0.835115579550056
LatentSpace_1	5568	Nucleus accumbens	nucleus accumbens	0.844637076744284
LatentSpace_1	5569	Nucleus accumbens	nucleus accumbens	0.821552499349194
LatentSpace_1	5570	Nucleus accumbens	nucleus accumbens	0.762219440140015
LatentSpace_1	5579	Nucleus accumbens	nucleus accumbens	0.771827266707912
LatentSpace_1	5580	Nucleus accumbens	nucleus accumbens	0.802344911892454
LatentSpace_1	5581	Nucleus accumbens	nucleus accumbens	0.821330015319541
LatentSpace_1	5582	Nucleus accumbens	nucleus accumbens	0.829101944592483
LatentSpace_1	5583	Nucleus accumbens	nucleus accumbens	0.827394490883372
LatentSpace_1	5584	Nucleus accumbens	nucleus accumbens	0.804893498908808
LatentSpace_1	5585	Olfactory tubercle	septal nuclei	0.810973791400982
LatentSpace_1	5586	Olfactory tubercle	septal nuclei	0.786837013773316
LatentSpace_1	5587	Nucleus accumbens	nucleus accumbens	0.798546609727767
LatentSpace_1	5588	Nucleus accumbens	nucleus accumbens	0.808559180543779
LatentSpace_1	5589	Nucleus accumbens	nucleus accumbens	0.809938787887318
LatentSpace_1	5590	Nucleus accumbens	nucleus accumbens	0.806188331112695
LatentSpace_1	5591	Nucleus accumbens	nucleus accumbens	0.796885214247312
LatentSpace_1	5592	Nucleus accumbens	nucleus accumbens	0.763258079585179
LatentSpace_1	5600	Olfactory tubercle	nucleus accumbens	0.727653319950047
LatentSpace_1	5601	Nucleus accumbens	nucleus accumbens	0.756202528842957
LatentSpace_1	5602	Nucleus accumbens	amygdala	0.780192718558607
LatentSpace_1	5603	Nucleus accumbens	amygdala	0.80139431253396
LatentSpace_1	5604	Nucleus accumbens	amygdala	0.800180298335299
LatentSpace_1	5605	Olfactory tubercle	amygdala	0.783544126194631
LatentSpace_1	5606	Olfactory tubercle	amygdala	0.741145426792498
LatentSpace_1	5607	Olfactory tubercle	amygdala	0.761196508118351
LatentSpace_1	5608	Olfactory tubercle	amygdala	0.792728573881529
LatentSpace_1	5609	Olfactory tubercle	amygdala	0.789575749953164
LatentSpace_1	5610	Nucleus accumbens	nucleus accumbens	0.76587362294956
LatentSpace_1	5611	Nucleus accumbens	nucleus accumbens	0.757359789594713
LatentSpace_1	5612	Nucleus accumbens	nucleus accumbens	0.744041138554177
LatentSpace_1	5613	Olfactory tubercle	nucleus accumbens	0.710194162665984
LatentSpace_1	5617	Olfactory tubercle	piriform cortex	0.73629371934998
LatentSpace_1	5618	Olfactory tubercle	piriform cortex	0.780748269077801
LatentSpace_1	5619	Olfactory tubercle	piriform cortex	0.816380580463058
LatentSpace_1	5620	Olfactory tubercle	piriform cortex	0.842606073627802
LatentSpace_1	5621	Olfactory tubercle	piriform cortex	0.857092699774846
LatentSpace_1	5622	Nucleus accumbens	piriform cortex	0.841660519237135
LatentSpace_1	5623	Olfactory tubercle	piriform cortex	0.797006398987469
LatentSpace_1	5624	Olfactory tubercle	piriform cortex	0.742003947846293
LatentSpace_1	5625	Olfactory tubercle	piriform cortex	0.690987844143452
LatentSpace_1	5626	Olfactory tubercle	piriform cortex	0.739835453787028
LatentSpace_1	5627	Olfactory tubercle	piriform cortex	0.792933871506356
LatentSpace_1	5628	Olfactory tubercle	piriform cortex	0.822488281515944
LatentSpace_1	5629	Nucleus accumbens	piriform cortex	0.823571510963436
LatentSpace_1	5630	Olfactory tubercle	piriform cortex	0.791432752998123
LatentSpace_1	5631	Olfactory tubercle	piriform cortex	0.754301973800042
LatentSpace_1	5632	Olfactory tubercle	piriform cortex	0.722264026791947
LatentSpace_1	5633	Olfactory tubercle	piriform cortex	0.690939293368686
LatentSpace_1	5635	Olfactory tubercle	piriform cortex	0.8319596054927
LatentSpace_1	5636	Olfactory tubercle	piriform cortex	0.862217825884506
LatentSpace_1	5638	Olfactory tubercle	piriform cortex	0.846172389245431
LatentSpace_1	5640	Olfactory tubercle	piriform cortex	0.757119050966211
LatentSpace_1	5641	Olfactory tubercle	piriform cortex	0.703413089176398
LatentSpace_1	5642	Olfactory tubercle	piriform cortex	0.750230831171034
LatentSpace_1	5644	Olfactory tubercle	piriform cortex	0.835635457902612
LatentSpace_1	5645	Olfactory tubercle	piriform cortex	0.837403870689542
LatentSpace_1	5646	Olfactory tubercle	piriform cortex	0.812712159849554
LatentSpace_1	5647	Olfactory tubercle	piriform cortex	0.766067783442436
LatentSpace_1	6515	Medial amygdalar nucleus	amygdala	0.904200903371379
LatentSpace_1	6516	Medial amygdalar nucleus	amygdala	0.902096648770947
LatentSpace_1	6517	Medial amygdalar nucleus	amygdala	0.896026348472446
LatentSpace_1	6531	Medial amygdalar nucleus	amygdala	0.897083972505693
LatentSpace_1	6532	Medial amygdalar nucleus	amygdala	0.895341631749897
LatentSpace_1	6533	Medial amygdalar nucleus	amygdala	0.894439445936716
LatentSpace_1	6554	Medial amygdalar nucleus	amygdala	0.891337588137698
LatentSpace_1	6555	Medial amygdalar nucleus	amygdala	0.887178551976487
LatentSpace_1	6556	Medial amygdalar nucleus	amygdala	0.886557138383664
LatentSpace_1	6571	Medial amygdalar nucleus	amygdala	0.900035792274653
LatentSpace_1	6572	Medial amygdalar nucleus	amygdala	0.891713599264065
LatentSpace_1	6573	Medial amygdalar nucleus	amygdala	0.89147365312422
LatentSpace_1	6594	Medial amygdalar nucleus	amygdala	0.880256230379599
LatentSpace_1	6595	Medial amygdalar nucleus	amygdala	0.866646812683823
LatentSpace_1	6612	Medial amygdalar nucleus	amygdala	0.878507602294874
LatentSpace_1	6613	Medial amygdalar nucleus	amygdala	0.880808515066876
LatentSpace_1	6633	Medial amygdalar nucleus	amygdala	0.878233576823492
LatentSpace_1	6652	Medial amygdalar nucleus	amygdala	0.873010169977886
LatentSpace_1	6653	Medial amygdalar nucleus	amygdala	0.882150095702173
LatentSpace_1	6693	Medial amygdalar nucleus	substantia innominata	0.847156199219115
LatentSpace_1	6694	Medial amygdalar nucleus	amygdala	0.864836435030208
LatentSpace_1	6695	Medial amygdalar nucleus	amygdala	0.879348447257641
LatentSpace_1	6718	Medial amygdalar nucleus	substantia innominata	0.835356148383681
LatentSpace_1	6736	Medial amygdalar nucleus	septal nuclei	0.839256607191469
LatentSpace_1	6865	Fundus of striatum	nucleus accumbens	0.840345251509792
LatentSpace_1	6888	Fundus of striatum	nucleus accumbens	0.865178483575528
LatentSpace_1	6902	Fundus of striatum	nucleus accumbens	0.866867634343587
LatentSpace_1	6925	Fundus of striatum	nucleus accumbens	0.899199924076375
LatentSpace_1	6926	Fundus of striatum	nucleus accumbens	0.903144218901299
LatentSpace_1	6927	Fundus of striatum	nucleus accumbens	0.85699402270139
LatentSpace_1	6940	Fundus of striatum	nucleus accumbens	0.852967441111256
LatentSpace_1	6941	Fundus of striatum	nucleus accumbens	0.876068787487615
LatentSpace_1	6942	Fundus of striatum	nucleus accumbens	0.876427472775805
LatentSpace_1	6963	Nucleus accumbens	nucleus accumbens	0.912793970108423
LatentSpace_1	6964	Nucleus accumbens	nucleus accumbens	0.919571378835063
LatentSpace_1	6965	Fundus of striatum	nucleus accumbens	0.895243984570959
LatentSpace_1	6966	Fundus of striatum	nucleus accumbens	0.793839951150455
LatentSpace_1	6978	Nucleus accumbens	nucleus accumbens	0.829664908420099
LatentSpace_1	6979	Nucleus accumbens	nucleus accumbens	0.873196968051006
LatentSpace_1	6980	Nucleus accumbens	nucleus accumbens	0.883590721130429
LatentSpace_1	6981	Nucleus accumbens	nucleus accumbens	0.880659062387636
LatentSpace_1	6982	Nucleus accumbens	nucleus accumbens	0.867153777073058
LatentSpace_1	6999	Nucleus accumbens	nucleus accumbens	0.906126216651909
LatentSpace_1	7000	Nucleus accumbens	nucleus accumbens	0.918121134202246
LatentSpace_1	7001	Nucleus accumbens	nucleus accumbens	0.924901364936813
LatentSpace_1	7002	Nucleus accumbens	nucleus accumbens	0.913189431275378
LatentSpace_1	7003	Nucleus accumbens	nucleus accumbens	0.862148143874414
LatentSpace_1	7016	Nucleus accumbens	nucleus accumbens	0.777515016352556
LatentSpace_1	7017	Nucleus accumbens	nucleus accumbens	0.885169312486061
LatentSpace_1	7018	Nucleus accumbens	nucleus accumbens	0.917941828701699
LatentSpace_1	7019	Nucleus accumbens	nucleus accumbens	0.927389605698202
LatentSpace_1	7020	Nucleus accumbens	nucleus accumbens	0.918905088009906
LatentSpace_1	7021	Nucleus accumbens	nucleus accumbens	0.908663689265622
LatentSpace_1	7022	Nucleus accumbens	nucleus accumbens	0.886834564353758
LatentSpace_1	7035	Nucleus accumbens	nucleus accumbens	0.903249495472824
LatentSpace_1	7036	Nucleus accumbens	nucleus accumbens	0.914801065348749
LatentSpace_1	7037	Nucleus accumbens	nucleus accumbens	0.924434953911992
LatentSpace_1	7038	Nucleus accumbens	nucleus accumbens	0.927207568067844
LatentSpace_1	7039	Nucleus accumbens	nucleus accumbens	0.925049716165026
LatentSpace_1	7040	Nucleus accumbens	nucleus accumbens	0.898157084648611
LatentSpace_1	7041	Nucleus accumbens	nucleus accumbens	0.785063752166128
LatentSpace_1	7054	Nucleus accumbens	nucleus accumbens	0.866179281617487
LatentSpace_1	7055	Nucleus accumbens	nucleus accumbens	0.913754003658856
LatentSpace_1	7056	Nucleus accumbens	nucleus accumbens	0.932796638700472
LatentSpace_1	7057	Nucleus accumbens	nucleus accumbens	0.929178475143872
LatentSpace_1	7058	Nucleus accumbens	nucleus accumbens	0.91864062745034
LatentSpace_1	7059	Nucleus accumbens	nucleus accumbens	0.907826959744082
LatentSpace_1	7060	Nucleus accumbens	nucleus accumbens	0.88067727831442
LatentSpace_1	7071	Nucleus accumbens	nucleus accumbens	0.882035915677533
LatentSpace_1	7072	Nucleus accumbens	nucleus accumbens	0.904748346719924
LatentSpace_1	7073	Nucleus accumbens	nucleus accumbens	0.911778830952428
LatentSpace_1	7074	Nucleus accumbens	nucleus accumbens	0.920872745733465
LatentSpace_1	7075	Nucleus accumbens	nucleus accumbens	0.923343532541334
LatentSpace_1	7076	Nucleus accumbens	nucleus accumbens	0.90893205192181
LatentSpace_1	7077	Nucleus accumbens	nucleus accumbens	0.852569020121678
LatentSpace_1	7090	Nucleus accumbens	nucleus accumbens	0.862416319409148
LatentSpace_1	7091	Nucleus accumbens	nucleus accumbens	0.897948106923116
LatentSpace_1	7092	Nucleus accumbens	nucleus accumbens	0.906223613456352
LatentSpace_1	7093	Nucleus accumbens	nucleus accumbens	0.896659682799903
LatentSpace_1	7094	Nucleus accumbens	nucleus accumbens	0.888833051084519
LatentSpace_1	7095	Nucleus accumbens	nucleus accumbens	0.875249319072096
LatentSpace_1	7096	Nucleus accumbens	nucleus accumbens	0.859417932433111
LatentSpace_1	7097	Nucleus accumbens	nucleus accumbens	0.837136367301216
LatentSpace_1	7098	Nucleus accumbens	substantia innominata	0.847306865861747
LatentSpace_1	7103	Nucleus accumbens	nucleus accumbens	0.835484748704648
LatentSpace_1	7104	Nucleus accumbens	nucleus accumbens	0.833655707269252
LatentSpace_1	7105	Nucleus accumbens	nucleus accumbens	0.847644254083259
LatentSpace_1	7106	Nucleus accumbens	nucleus accumbens	0.871038172860964
LatentSpace_1	7107	Nucleus accumbens	nucleus accumbens	0.894422910618176
LatentSpace_1	7108	Nucleus accumbens	nucleus accumbens	0.899743413565239
LatentSpace_1	7109	Nucleus accumbens	nucleus accumbens	0.896846681432419
LatentSpace_1	7110	Nucleus accumbens	nucleus accumbens	0.883437616676647
LatentSpace_1	7111	Nucleus accumbens	nucleus accumbens	0.841925647586521
LatentSpace_1	7123	Nucleus accumbens	nucleus accumbens	0.745271976944567
LatentSpace_1	7124	Nucleus accumbens	nucleus accumbens	0.848024681006805
LatentSpace_1	7125	Nucleus accumbens	nucleus accumbens	0.882500750109379
LatentSpace_1	7126	Nucleus accumbens	nucleus accumbens	0.883181324860954
LatentSpace_1	7127	Nucleus accumbens	nucleus accumbens	0.872779194473396
LatentSpace_1	7128	Nucleus accumbens	nucleus accumbens	0.867832689157805
LatentSpace_1	7129	Nucleus accumbens	nucleus accumbens	0.855847029600818
LatentSpace_1	7130	Nucleus accumbens	nucleus accumbens	0.834417277099831
LatentSpace_1	7131	Nucleus accumbens	nucleus accumbens	0.813484468888092
LatentSpace_1	7136	Nucleus accumbens	nucleus accumbens	0.803785130523282
LatentSpace_1	7137	Nucleus accumbens	nucleus accumbens	0.820649449100042
LatentSpace_1	7138	Nucleus accumbens	nucleus accumbens	0.846137131237906
LatentSpace_1	7139	Nucleus accumbens	nucleus accumbens	0.873800341509519
LatentSpace_1	7140	Nucleus accumbens	nucleus accumbens	0.886607073531339
LatentSpace_1	7141	Nucleus accumbens	nucleus accumbens	0.876815545342495
LatentSpace_1	7142	Nucleus accumbens	nucleus accumbens	0.853078914494043
LatentSpace_1	7143	Nucleus accumbens	nucleus accumbens	0.808005002584525
LatentSpace_1	7156	Nucleus accumbens	nucleus accumbens	0.828290150349613
LatentSpace_1	7157	Nucleus accumbens	nucleus accumbens	0.861584038392598
LatentSpace_1	7158	Nucleus accumbens	nucleus accumbens	0.874405002023282
LatentSpace_1	7159	Nucleus accumbens	nucleus accumbens	0.87340533480769
LatentSpace_1	7160	Nucleus accumbens	nucleus accumbens	0.863477719337015
LatentSpace_1	7161	Nucleus accumbens	nucleus accumbens	0.84188941538218
LatentSpace_1	7162	Nucleus accumbens	nucleus accumbens	0.814159069315988
LatentSpace_1	7164	Lateral septal complex	septal nuclei	0.888082783829833
LatentSpace_1	7165	Lateral septal complex	septal nuclei	0.868941531228494
LatentSpace_1	7166	Lateral septal complex	septal nuclei	0.809709250689319
LatentSpace_1	7167	Nucleus accumbens	nucleus accumbens	0.796081005023752
LatentSpace_1	7168	Nucleus accumbens	nucleus accumbens	0.824469547519523
LatentSpace_1	7169	Nucleus accumbens	nucleus accumbens	0.83987250327059
LatentSpace_1	7170	Nucleus accumbens	nucleus accumbens	0.860329339839337
LatentSpace_1	7171	Nucleus accumbens	nucleus accumbens	0.855641853620339
LatentSpace_1	7172	Nucleus accumbens	nucleus accumbens	0.831817557898643
LatentSpace_1	7173	Nucleus accumbens	nucleus accumbens	0.775680530846112
LatentSpace_1	7174	Nucleus accumbens	piriform cortex	0.751874121312783
LatentSpace_1	7186	Nucleus accumbens	nucleus accumbens	0.783086597257993
LatentSpace_1	7187	Nucleus accumbens	nucleus accumbens	0.824201405145694
LatentSpace_1	7188	Nucleus accumbens	nucleus accumbens	0.843872008408392
LatentSpace_1	7189	Nucleus accumbens	nucleus accumbens	0.845715112770054
LatentSpace_1	7190	Nucleus accumbens	nucleus accumbens	0.834671577167167
LatentSpace_1	7191	Nucleus accumbens	amygdala	0.809450860949532
LatentSpace_1	7192	Olfactory tubercle	septal nuclei	0.817607579528619
LatentSpace_1	7193	Olfactory tubercle	amygdala	0.807389357977292
LatentSpace_1	7194	Nucleus accumbens	amygdala	0.809140388152826
LatentSpace_1	7195	Nucleus accumbens	nucleus accumbens	0.825429787948639
LatentSpace_1	7196	Nucleus accumbens	nucleus accumbens	0.834655673544888
LatentSpace_1	7197	Nucleus accumbens	nucleus accumbens	0.830540910027174
LatentSpace_1	7198	Nucleus accumbens	nucleus accumbens	0.803630037012493
LatentSpace_1	7199	Nucleus accumbens	nucleus accumbens	0.748597559031889
LatentSpace_1	7211	Nucleus accumbens	piriform cortex	0.790098629067293
LatentSpace_1	7212	Nucleus accumbens	piriform cortex	0.809475375001678
LatentSpace_1	7213	Nucleus accumbens	piriform cortex	0.824135033698733
LatentSpace_1	7214	Nucleus accumbens	piriform cortex	0.83222144122087
LatentSpace_1	7215	Nucleus accumbens	amygdala	0.804351164462726
LatentSpace_1	7216	Olfactory tubercle	amygdala	0.767847458438502
LatentSpace_1	7217	Olfactory tubercle	amygdala	0.784356614088116
LatentSpace_1	7218	Lateral septal complex	piriform cortex	0.818098554691918
LatentSpace_1	7219	Nucleus accumbens	piriform cortex	0.816865411737841
LatentSpace_1	7220	Nucleus accumbens	piriform cortex	0.795590818570342
LatentSpace_1	7221	Nucleus accumbens	piriform cortex	0.776703013885561
LatentSpace_1	7222	Nucleus accumbens	piriform cortex	0.75199609300404
LatentSpace_1	7230	Olfactory tubercle	piriform cortex	0.809465422630323
LatentSpace_1	7233	Nucleus accumbens	piriform cortex	0.887750755333059
LatentSpace_1	7234	Nucleus accumbens	piriform cortex	0.883361313283455
LatentSpace_1	7241	Nucleus accumbens	piriform cortex	0.863309767645587
LatentSpace_1	7242	Nucleus accumbens	piriform cortex	0.858766731034699
LatentSpace_1	7243	Nucleus accumbens	piriform cortex	0.840649407358031
LatentSpace_1	7245	Olfactory tubercle	piriform cortex	0.78708555270138
LatentSpace_1	7246	Olfactory tubercle	piriform cortex	0.766694650319194
LatentSpace_1	7258	Olfactory tubercle	piriform cortex	0.831920891925873
LatentSpace_1	8201	Medial amygdalar nucleus	amygdala	0.898339863384282
LatentSpace_1	8202	Medial amygdalar nucleus	amygdala	0.896863657144541
LatentSpace_1	8217	Medial amygdalar nucleus	amygdala	0.884393685191898
LatentSpace_1	8218	Medial amygdalar nucleus	amygdala	0.877825781429556
LatentSpace_1	8240	Medial amygdalar nucleus	amygdala	0.88291647838821
LatentSpace_1	8256	Medial amygdalar nucleus	amygdala	0.883918328581014
LatentSpace_1	8278	Medial amygdalar nucleus	amygdala	0.870373076634347
LatentSpace_1	8487	Caudoputamen	nucleus accumbens	0.874564728497827
LatentSpace_1	8526	Caudoputamen	nucleus accumbens	0.888781338999948
LatentSpace_1	8527	Caudoputamen	nucleus accumbens	0.91414733948121
LatentSpace_1	8528	Fundus of striatum	nucleus accumbens	0.903158180164004
LatentSpace_1	8553	Fundus of striatum	nucleus accumbens	0.922832692347418
LatentSpace_1	8554	Caudoputamen	nucleus accumbens	0.934139934515696
LatentSpace_1	8555	Caudoputamen	nucleus accumbens	0.909018775910257
LatentSpace_1	8556	Caudoputamen	nucleus accumbens	0.820283456375329
LatentSpace_1	8568	Caudoputamen	nucleus accumbens	0.886257930997239
LatentSpace_1	8569	Caudoputamen	nucleus accumbens	0.9231724731938
LatentSpace_1	8592	Caudoputamen	nucleus accumbens	0.938600472119663
LatentSpace_1	8593	Caudoputamen	nucleus accumbens	0.90115064124275
LatentSpace_1	8605	Caudoputamen	nucleus accumbens	0.843681091271967
LatentSpace_1	8606	Caudoputamen	nucleus accumbens	0.90272028273742
LatentSpace_1	8607	Caudoputamen	nucleus accumbens	0.91783205297785
LatentSpace_1	8627	Caudoputamen	nucleus accumbens	0.941468583257251
LatentSpace_1	8628	Caudoputamen	nucleus accumbens	0.928685683425624
LatentSpace_1	8629	Caudoputamen	nucleus accumbens	0.873462107630951
LatentSpace_1	8641	Caudoputamen	nucleus accumbens	0.869677623348876
LatentSpace_1	8642	Caudoputamen	nucleus accumbens	0.90856284611008
LatentSpace_1	8643	Caudoputamen	nucleus accumbens	0.924662615688839
LatentSpace_1	8661	Caudoputamen	nucleus accumbens	0.943988820458012
LatentSpace_1	8662	Caudoputamen	nucleus accumbens	0.938167512925041
LatentSpace_1	8663	Caudoputamen	nucleus accumbens	0.907758349945531
LatentSpace_1	8676	Caudoputamen	nucleus accumbens	0.815934535176855
LatentSpace_1	8677	Caudoputamen	nucleus accumbens	0.901074740648913
LatentSpace_1	8678	Caudoputamen	nucleus accumbens	0.928912075617802
LatentSpace_1	8679	Caudoputamen	nucleus accumbens	0.934241987447553
LatentSpace_1	8680	Caudoputamen	nucleus accumbens	0.937603485012267
LatentSpace_1	8681	Caudoputamen	nucleus accumbens	0.933380115252511
LatentSpace_1	8682	Nucleus accumbens	nucleus accumbens	0.917370593389605
LatentSpace_1	8698	Nucleus accumbens	nucleus accumbens	0.939891446895655
LatentSpace_1	8699	Caudoputamen	nucleus accumbens	0.943655611811234
LatentSpace_1	8700	Caudoputamen	nucleus accumbens	0.949216201792342
LatentSpace_1	8701	Caudoputamen	nucleus accumbens	0.943889427162511
LatentSpace_1	8702	Caudoputamen	nucleus accumbens	0.922474886175772
LatentSpace_1	8703	Caudoputamen	nucleus accumbens	0.853008918432667
LatentSpace_1	8716	Caudoputamen	nucleus accumbens	0.864717331134066
LatentSpace_1	8717	Caudoputamen	nucleus accumbens	0.927741079294196
LatentSpace_1	8718	Caudoputamen	nucleus accumbens	0.946826856399917
LatentSpace_1	8719	Caudoputamen	nucleus accumbens	0.953555836881384
LatentSpace_1	8720	Caudoputamen	nucleus accumbens	0.953862104558982
LatentSpace_1	8721	Caudoputamen	nucleus accumbens	0.945011599060963
LatentSpace_1	8722	Nucleus accumbens	nucleus accumbens	0.932007729098507
LatentSpace_1	8723	Nucleus accumbens	nucleus accumbens	0.895024457016925
LatentSpace_1	8735	Nucleus accumbens	nucleus accumbens	0.931573399555315
LatentSpace_1	8736	Nucleus accumbens	nucleus accumbens	0.945590169042825
LatentSpace_1	8737	Caudoputamen	nucleus accumbens	0.948771700227538
LatentSpace_1	8738	Caudoputamen	nucleus accumbens	0.948801290312969
LatentSpace_1	8739	Caudoputamen	nucleus accumbens	0.942860981987087
LatentSpace_1	8740	Caudoputamen	nucleus accumbens	0.932387267713365
LatentSpace_1	8741	Caudoputamen	nucleus accumbens	0.888341261721843
LatentSpace_1	8754	Nucleus accumbens	nucleus accumbens	0.793367368455948
LatentSpace_1	8755	Caudoputamen	nucleus accumbens	0.905138315284884
LatentSpace_1	8756	Caudoputamen	nucleus accumbens	0.935775002299873
LatentSpace_1	8757	Caudoputamen	nucleus accumbens	0.950236813071976
LatentSpace_1	8758	Caudoputamen	nucleus accumbens	0.950328688524371
LatentSpace_1	8759	Caudoputamen	nucleus accumbens	0.945256242420361
LatentSpace_1	8760	Nucleus accumbens	nucleus accumbens	0.935045651953761
LatentSpace_1	8761	Nucleus accumbens	nucleus accumbens	0.907101294505989
LatentSpace_1	8762	Nucleus accumbens	nucleus accumbens	0.865146864039689
LatentSpace_1	8763	Nucleus accumbens	substantia innominata	0.84191993229801
LatentSpace_1	8764	Nucleus accumbens	substantia innominata	0.892231973963169
LatentSpace_1	8770	Nucleus accumbens	nucleus accumbens	0.866998147632907
LatentSpace_1	8771	Nucleus accumbens	nucleus accumbens	0.886501042818495
LatentSpace_1	8772	Nucleus accumbens	nucleus accumbens	0.912155957307392
LatentSpace_1	8773	Nucleus accumbens	nucleus accumbens	0.929854424107551
LatentSpace_1	8774	Nucleus accumbens	nucleus accumbens	0.936247770560215
LatentSpace_1	8775	Nucleus accumbens	nucleus accumbens	0.940061469452255
LatentSpace_1	8776	Caudoputamen	nucleus accumbens	0.942769767293007
LatentSpace_1	8777	Caudoputamen	nucleus accumbens	0.93395877900452
LatentSpace_1	8778	Caudoputamen	nucleus accumbens	0.907693721711038
LatentSpace_1	8779	Nucleus accumbens	nucleus accumbens	0.800061097208297
LatentSpace_1	8792	Nucleus accumbens	nucleus accumbens	0.814645257340597
LatentSpace_1	8793	Nucleus accumbens	nucleus accumbens	0.889539757322499
LatentSpace_1	8794	Caudoputamen	nucleus accumbens	0.918334432065827
LatentSpace_1	8795	Nucleus accumbens	nucleus accumbens	0.931176514307379
LatentSpace_1	8796	Nucleus accumbens	nucleus accumbens	0.92700490345311
LatentSpace_1	8797	Nucleus accumbens	nucleus accumbens	0.916833720504018
LatentSpace_1	8798	Nucleus accumbens	nucleus accumbens	0.89809046198662
LatentSpace_1	8799	Nucleus accumbens	nucleus accumbens	0.871772090418097
LatentSpace_1	8800	Nucleus accumbens	nucleus accumbens	0.85031977841625
LatentSpace_1	8801	Nucleus accumbens	septal nuclei	0.830193730626147
LatentSpace_1	8806	Nucleus accumbens	nucleus accumbens	0.850088457113467
LatentSpace_1	8807	Nucleus accumbens	nucleus accumbens	0.851429618447181
LatentSpace_1	8808	Nucleus accumbens	nucleus accumbens	0.87592789132794
LatentSpace_1	8809	Nucleus accumbens	nucleus accumbens	0.902257257090897
LatentSpace_1	8810	Nucleus accumbens	nucleus accumbens	0.912421481027822
LatentSpace_1	8811	Nucleus accumbens	nucleus accumbens	0.92060714872958
LatentSpace_1	8812	Nucleus accumbens	nucleus accumbens	0.917084875826682
LatentSpace_1	8813	Nucleus accumbens	nucleus accumbens	0.912074438553898
LatentSpace_1	8814	Caudoputamen	nucleus accumbens	0.890334226110348
LatentSpace_1	8815	Nucleus accumbens	nucleus accumbens	0.810249568178445
LatentSpace_1	8829	Nucleus accumbens	nucleus accumbens	0.877499523843963
LatentSpace_1	8830	Nucleus accumbens	nucleus accumbens	0.906176376606229
LatentSpace_1	8831	Nucleus accumbens	nucleus accumbens	0.909472363621104
LatentSpace_1	8832	Nucleus accumbens	nucleus accumbens	0.896324151302463
LatentSpace_1	8833	Nucleus accumbens	nucleus accumbens	0.8844803946118
LatentSpace_1	8834	Nucleus accumbens	nucleus accumbens	0.863440952953142
LatentSpace_1	8835	Nucleus accumbens	nucleus accumbens	0.845553352514236
LatentSpace_1	8836	Nucleus accumbens	nucleus accumbens	0.825000688307871
LatentSpace_1	8841	Nucleus accumbens	nucleus accumbens	0.820130079974913
LatentSpace_1	8842	Nucleus accumbens	nucleus accumbens	0.838182771059683
LatentSpace_1	8843	Nucleus accumbens	nucleus accumbens	0.868170679043575
LatentSpace_1	8844	Nucleus accumbens	nucleus accumbens	0.895254074355732
LatentSpace_1	8845	Nucleus accumbens	nucleus accumbens	0.901054681897163
LatentSpace_1	8846	Nucleus accumbens	nucleus accumbens	0.895874427899078
LatentSpace_1	8847	Nucleus accumbens	nucleus accumbens	0.885961303946101
LatentSpace_1	8848	Nucleus accumbens	nucleus accumbens	0.860175700073919
LatentSpace_1	8849	Nucleus accumbens	nucleus accumbens	0.780519601435072
LatentSpace_1	8862	Nucleus accumbens	nucleus accumbens	0.779862308077601
LatentSpace_1	8863	Nucleus accumbens	nucleus accumbens	0.856490131238978
LatentSpace_1	8864	Nucleus accumbens	nucleus accumbens	0.883270536139031
LatentSpace_1	8865	Nucleus accumbens	nucleus accumbens	0.888460852083929
LatentSpace_1	8866	Nucleus accumbens	nucleus accumbens	0.888254947034873
LatentSpace_1	8867	Nucleus accumbens	nucleus accumbens	0.869459355356905
LatentSpace_1	8868	Nucleus accumbens	nucleus accumbens	0.85088745068154
LatentSpace_1	8869	Nucleus accumbens	nucleus accumbens	0.813823677895105
LatentSpace_1	8873	Lateral septal complex	amygdala	0.807494128106994
LatentSpace_1	8874	Nucleus accumbens	nucleus accumbens	0.803069628962102
LatentSpace_1	8875	Nucleus accumbens	nucleus accumbens	0.836311131791137
LatentSpace_1	8876	Nucleus accumbens	nucleus accumbens	0.864762992770018
LatentSpace_1	8877	Nucleus accumbens	nucleus accumbens	0.880893752449448
LatentSpace_1	8878	Nucleus accumbens	nucleus accumbens	0.87321567015072
LatentSpace_1	8879	Nucleus accumbens	nucleus accumbens	0.850517358427497
LatentSpace_1	8880	Nucleus accumbens	nucleus accumbens	0.805776166006648
LatentSpace_1	8895	Nucleus accumbens	nucleus accumbens	0.802259068499194
LatentSpace_1	8896	Nucleus accumbens	nucleus accumbens	0.851278645474174
LatentSpace_1	8897	Nucleus accumbens	nucleus accumbens	0.866723374237067
LatentSpace_1	8898	Nucleus accumbens	nucleus accumbens	0.857052609466301
LatentSpace_1	8899	Nucleus accumbens	nucleus accumbens	0.83593060165443
LatentSpace_1	8900	Nucleus accumbens	amygdala	0.827135163894388
LatentSpace_1	8901	Lateral septal complex	amygdala	0.816756199867371
LatentSpace_1	8902	Lateral septal complex	septal nuclei	0.835615866285859
LatentSpace_1	8903	Lateral septal complex	amygdala	0.821338616933314
LatentSpace_1	8904	Nucleus accumbens	amygdala	0.827285486260842
LatentSpace_1	8905	Nucleus accumbens	nucleus accumbens	0.827267692849432
LatentSpace_1	8906	Nucleus accumbens	nucleus accumbens	0.850469379941791
LatentSpace_1	8907	Nucleus accumbens	nucleus accumbens	0.85764578735843
LatentSpace_1	8908	Nucleus accumbens	nucleus accumbens	0.825896310093873
LatentSpace_1	8909	Nucleus accumbens	nucleus accumbens	0.749175851845285
LatentSpace_1	8924	Nucleus accumbens	piriform cortex	0.783360508447466
LatentSpace_1	8925	Nucleus accumbens	piriform cortex	0.80238413984259
LatentSpace_1	8926	Nucleus accumbens	piriform cortex	0.829135204378489
LatentSpace_1	8927	Nucleus accumbens	piriform cortex	0.846834128375201
LatentSpace_1	8928	Nucleus accumbens	piriform cortex	0.823746865554084
LatentSpace_1	8932	Lateral septal complex	piriform cortex	0.838781155733743
LatentSpace_1	8933	Nucleus accumbens	piriform cortex	0.835168155481325
LatentSpace_1	8934	Nucleus accumbens	amygdala	0.798181649772135
LatentSpace_1	8935	Nucleus accumbens	nucleus accumbens	0.782772953494779
LatentSpace_1	8936	Nucleus accumbens	piriform cortex	0.764708942610259
LatentSpace_1	8937	Nucleus accumbens	piriform cortex	0.754097340461993
LatentSpace_1	8951	Nucleus accumbens	piriform cortex	0.880911198664572
LatentSpace_1	8952	Nucleus accumbens	piriform cortex	0.88415106179671
LatentSpace_1	8959	Nucleus accumbens	piriform cortex	0.875746297266846
LatentSpace_1	8960	Nucleus accumbens	piriform cortex	0.869564410340973
LatentSpace_1	10010	Medial amygdalar nucleus	amygdala	0.890046231155139
LatentSpace_1	10064	Medial amygdalar nucleus	septal nuclei	0.870216074966665
LatentSpace_1	10249	Caudoputamen	nucleus accumbens	0.895709319826068
LatentSpace_1	10250	Caudoputamen	nucleus accumbens	0.892530478915042
LatentSpace_1	10292	Caudoputamen	nucleus accumbens	0.872112282589406
LatentSpace_1	10293	Caudoputamen	nucleus accumbens	0.919719930200668
LatentSpace_1	10294	Caudoputamen	nucleus accumbens	0.926976754541142
LatentSpace_1	10295	Caudoputamen	nucleus accumbens	0.906491009154916
LatentSpace_1	10311	Caudoputamen	nucleus accumbens	0.904995855055786
LatentSpace_1	10312	Caudoputamen	nucleus accumbens	0.927572096710586
LatentSpace_1	10313	Caudoputamen	nucleus accumbens	0.918397081311793
LatentSpace_1	10314	Caudoputamen	nucleus accumbens	0.87249452597071
LatentSpace_1	10315	Caudoputamen	nucleus accumbens	0.793524074612131
LatentSpace_1	10326	Caudoputamen	nucleus accumbens	0.866364884553918
LatentSpace_1	10327	Caudoputamen	nucleus accumbens	0.92564657065029
LatentSpace_1	10328	Caudoputamen	nucleus accumbens	0.939943791641605
LatentSpace_1	10329	Caudoputamen	nucleus accumbens	0.935254940661932
LatentSpace_1	10354	Caudoputamen	nucleus accumbens	0.946633816069085
LatentSpace_1	10355	Caudoputamen	nucleus accumbens	0.950925260744946
LatentSpace_1	10356	Caudoputamen	nucleus accumbens	0.93486130362647
LatentSpace_1	10357	Caudoputamen	nucleus accumbens	0.892002439347558
LatentSpace_1	10368	Caudoputamen	nucleus accumbens	0.853669951365819
LatentSpace_1	10369	Caudoputamen	nucleus accumbens	0.921762731453265
LatentSpace_1	10370	Caudoputamen	nucleus accumbens	0.937519523593953
LatentSpace_1	10371	Caudoputamen	nucleus accumbens	0.942751621959636
LatentSpace_1	10372	Caudoputamen	nucleus accumbens	0.938239635086985
LatentSpace_1	10395	Caudoputamen	nucleus accumbens	0.942823522372634
LatentSpace_1	10396	Caudoputamen	nucleus accumbens	0.953006944174493
LatentSpace_1	10397	Caudoputamen	nucleus accumbens	0.950855757191063
LatentSpace_1	10398	Caudoputamen	nucleus accumbens	0.932898849842018
LatentSpace_1	10399	Caudoputamen	nucleus accumbens	0.875981457771027
LatentSpace_1	10410	Caudoputamen	nucleus accumbens	0.801814145050229
LatentSpace_1	10411	Caudoputamen	nucleus accumbens	0.888615397594755
LatentSpace_1	10412	Caudoputamen	nucleus accumbens	0.916533089076664
LatentSpace_1	10413	Caudoputamen	nucleus accumbens	0.93020632724456
LatentSpace_1	10414	Caudoputamen	nucleus accumbens	0.940580324435513
LatentSpace_1	10431	Caudoputamen	nucleus accumbens	0.948756595832973
LatentSpace_1	10432	Caudoputamen	nucleus accumbens	0.943872295196607
LatentSpace_1	10433	Caudoputamen	nucleus accumbens	0.918912566107418
LatentSpace_1	10434	Caudoputamen	nucleus accumbens	0.845031023090588
LatentSpace_1	10445	Caudoputamen	claustrum	0.781193257023438
LatentSpace_1	10446	Caudoputamen	nucleus accumbens	0.848286042783288
LatentSpace_1	10447	Caudoputamen	nucleus accumbens	0.899543063084943
LatentSpace_1	10448	Caudoputamen	nucleus accumbens	0.92259818614933
LatentSpace_1	10449	Caudoputamen	nucleus accumbens	0.939345633258064
LatentSpace_1	10450	Caudoputamen	nucleus accumbens	0.939424909388876
LatentSpace_1	10451	Caudoputamen	nucleus accumbens	0.943843310422381
LatentSpace_1	10452	Caudoputamen	nucleus accumbens	0.942397031650887
LatentSpace_1	10462	Caudoputamen	nucleus accumbens	0.949778777695909
LatentSpace_1	10463	Caudoputamen	nucleus accumbens	0.947763540516436
LatentSpace_1	10464	Caudoputamen	nucleus accumbens	0.949030067064899
LatentSpace_1	10465	Caudoputamen	nucleus accumbens	0.949501194154895
LatentSpace_1	10466	Caudoputamen	nucleus accumbens	0.938936453416513
LatentSpace_1	10467	Caudoputamen	nucleus accumbens	0.914129167547034
LatentSpace_1	10468	Caudoputamen	nucleus accumbens	0.812887788282227
LatentSpace_1	10480	Caudoputamen	nucleus accumbens	0.8796969120514
LatentSpace_1	10481	Caudoputamen	nucleus accumbens	0.925137916110151
LatentSpace_1	10482	Caudoputamen	nucleus accumbens	0.947348885539379
LatentSpace_1	10483	Caudoputamen	nucleus accumbens	0.949817349823361
LatentSpace_1	10484	Caudoputamen	nucleus accumbens	0.953128989624687
LatentSpace_1	10485	Caudoputamen	nucleus accumbens	0.95413418180105
LatentSpace_1	10486	Nucleus accumbens	nucleus accumbens	0.948943334824687
LatentSpace_1	10487	Nucleus accumbens	nucleus accumbens	0.926404675954772
LatentSpace_1	10498	Nucleus accumbens	nucleus accumbens	0.932576691335605
LatentSpace_1	10499	Nucleus accumbens	nucleus accumbens	0.954170139639016
LatentSpace_1	10500	Caudoputamen	nucleus accumbens	0.955720637943657
LatentSpace_1	10501	Caudoputamen	nucleus accumbens	0.958042930017329
LatentSpace_1	10502	Caudoputamen	nucleus accumbens	0.954642302572875
LatentSpace_1	10503	Caudoputamen	nucleus accumbens	0.949227193955452
LatentSpace_1	10504	Caudoputamen	nucleus accumbens	0.946191605657224
LatentSpace_1	10505	Caudoputamen	nucleus accumbens	0.925646897275446
LatentSpace_1	10506	Caudoputamen	nucleus accumbens	0.862147034536076
LatentSpace_1	10518	Caudoputamen	nucleus accumbens	0.830322301482241
LatentSpace_1	10519	Caudoputamen	nucleus accumbens	0.917021674106946
LatentSpace_1	10520	Caudoputamen	nucleus accumbens	0.949995600698828
LatentSpace_1	10521	Caudoputamen	nucleus accumbens	0.955764770423319
LatentSpace_1	10522	Caudoputamen	nucleus accumbens	0.958836005830188
LatentSpace_1	10523	Caudoputamen	nucleus accumbens	0.960108540286505
LatentSpace_1	10524	Caudoputamen	nucleus accumbens	0.960753744591523
LatentSpace_1	10525	Nucleus accumbens	nucleus accumbens	0.952672849848303
LatentSpace_1	10535	Caudoputamen	nucleus accumbens	0.944148683732424
LatentSpace_1	10536	Caudoputamen	nucleus accumbens	0.958057881341672
LatentSpace_1	10537	Caudoputamen	nucleus accumbens	0.961085224638043
LatentSpace_1	10538	Caudoputamen	nucleus accumbens	0.958106724830311
LatentSpace_1	10539	Caudoputamen	nucleus accumbens	0.952460952698637
LatentSpace_1	10540	Caudoputamen	nucleus accumbens	0.949750930234037
LatentSpace_1	10541	Caudoputamen	nucleus accumbens	0.935235584395521
LatentSpace_1	10542	Caudoputamen	nucleus accumbens	0.871439309322513
LatentSpace_1	10555	Caudoputamen	nucleus accumbens	0.874683151800004
LatentSpace_1	10556	Caudoputamen	nucleus accumbens	0.926389548868355
LatentSpace_1	10557	Caudoputamen	nucleus accumbens	0.946124044693141
LatentSpace_1	10558	Caudoputamen	nucleus accumbens	0.954757603239542
LatentSpace_1	10559	Caudoputamen	nucleus accumbens	0.957512638513685
LatentSpace_1	10560	Caudoputamen	nucleus accumbens	0.955953336701615
LatentSpace_1	10561	Nucleus accumbens	nucleus accumbens	0.877191199709725
LatentSpace_1	10562	Nucleus accumbens	septal nuclei	0.841164911628338
LatentSpace_1	10563	Nucleus accumbens	septal nuclei	0.882907255099707
LatentSpace_1	10568	Nucleus accumbens	septal nuclei	0.857928095611078
LatentSpace_1	10569	Nucleus accumbens	nucleus accumbens	0.872852814379971
LatentSpace_1	10570	Nucleus accumbens	nucleus accumbens	0.902614485780873
LatentSpace_1	10571	Nucleus accumbens	nucleus accumbens	0.937025549367824
LatentSpace_1	10572	Nucleus accumbens	nucleus accumbens	0.945556159671388
LatentSpace_1	10573	Caudoputamen	nucleus accumbens	0.952539513029325
LatentSpace_1	10574	Caudoputamen	nucleus accumbens	0.953514839964873
LatentSpace_1	10575	Caudoputamen	nucleus accumbens	0.948771803257137
LatentSpace_1	10576	Caudoputamen	nucleus accumbens	0.936580067619853
LatentSpace_1	10577	Caudoputamen	nucleus accumbens	0.889835835314041
LatentSpace_1	10590	Caudoputamen	nucleus accumbens	0.868831953927987
LatentSpace_1	10591	Caudoputamen	nucleus accumbens	0.915001120675891
LatentSpace_1	10592	Caudoputamen	nucleus accumbens	0.935320381761271
LatentSpace_1	10593	Caudoputamen	nucleus accumbens	0.944558892432979
LatentSpace_1	10594	Nucleus accumbens	nucleus accumbens	0.943577053231324
LatentSpace_1	10595	Nucleus accumbens	nucleus accumbens	0.913637420778299
LatentSpace_1	10596	Nucleus accumbens	nucleus accumbens	0.879435769564421
LatentSpace_1	10597	Nucleus accumbens	nucleus accumbens	0.857384914391786
LatentSpace_1	10598	Nucleus accumbens	nucleus accumbens	0.83660450532403
LatentSpace_1	10603	Nucleus accumbens	nucleus accumbens	0.842637834985137
LatentSpace_1	10604	Nucleus accumbens	nucleus accumbens	0.856752636348687
LatentSpace_1	10605	Nucleus accumbens	nucleus accumbens	0.892742299132969
LatentSpace_1	10606	Nucleus accumbens	nucleus accumbens	0.921262431102384
LatentSpace_1	10607	Nucleus accumbens	nucleus accumbens	0.929772840971211
LatentSpace_1	10608	Nucleus accumbens	nucleus accumbens	0.934526965357114
LatentSpace_1	10609	Caudoputamen	nucleus accumbens	0.935381987494584
LatentSpace_1	10610	Caudoputamen	nucleus accumbens	0.924508821642396
LatentSpace_1	10611	Caudoputamen	nucleus accumbens	0.885937802769291
LatentSpace_1	10625	Nucleus accumbens	nucleus accumbens	0.854089196934459
LatentSpace_1	10626	Caudoputamen	nucleus accumbens	0.904491209756463
LatentSpace_1	10627	Caudoputamen	nucleus accumbens	0.92357001750345
LatentSpace_1	10628	Nucleus accumbens	nucleus accumbens	0.925431802825312
LatentSpace_1	10629	Nucleus accumbens	nucleus accumbens	0.896761376178916
LatentSpace_1	10630	Nucleus accumbens	nucleus accumbens	0.86604920947992
LatentSpace_1	10631	Nucleus accumbens	nucleus accumbens	0.851696252793011
LatentSpace_1	10632	Nucleus accumbens	nucleus accumbens	0.833069059230264
LatentSpace_1	10633	Lateral septal complex	septal nuclei	0.854319151273896
LatentSpace_1	10636	Lateral septal complex	septal nuclei	0.812043678631137
LatentSpace_1	10637	Nucleus accumbens	nucleus accumbens	0.825234752614811
LatentSpace_1	10638	Nucleus accumbens	nucleus accumbens	0.848914042458639
LatentSpace_1	10639	Nucleus accumbens	nucleus accumbens	0.882282860156608
LatentSpace_1	10640	Nucleus accumbens	nucleus accumbens	0.912292855281468
LatentSpace_1	10641	Nucleus accumbens	nucleus accumbens	0.919518890101854
LatentSpace_1	10642	Nucleus accumbens	nucleus accumbens	0.916932865672707
LatentSpace_1	10643	Nucleus accumbens	nucleus accumbens	0.900759678636676
LatentSpace_1	10644	Nucleus accumbens	nucleus accumbens	0.848377271494865
LatentSpace_1	10659	Nucleus accumbens	nucleus accumbens	0.822050670980043
LatentSpace_1	10660	Nucleus accumbens	nucleus accumbens	0.881110745644949
LatentSpace_1	10661	Nucleus accumbens	nucleus accumbens	0.898226522245442
LatentSpace_1	10662	Nucleus accumbens	nucleus accumbens	0.890990245642923
LatentSpace_1	10663	Nucleus accumbens	nucleus accumbens	0.865199096728194
LatentSpace_1	10664	Nucleus accumbens	nucleus accumbens	0.851361027394055
LatentSpace_1	10665	Nucleus accumbens	nucleus accumbens	0.823129679120124
LatentSpace_1	10666	Lateral septal complex	septal nuclei	0.838085532429473
LatentSpace_1	10668	Lateral septal complex	septal nuclei	0.86115848292724
LatentSpace_1	10669	Lateral septal complex	amygdala	0.812408581088621
LatentSpace_1	10670	Nucleus accumbens	nucleus accumbens	0.811331197532175
LatentSpace_1	10671	Nucleus accumbens	nucleus accumbens	0.853167565450391
LatentSpace_1	10672	Nucleus accumbens	nucleus accumbens	0.882166048537791
LatentSpace_1	10673	Nucleus accumbens	nucleus accumbens	0.89813957999061
LatentSpace_1	10674	Nucleus accumbens	nucleus accumbens	0.879763820577427
LatentSpace_1	10675	Nucleus accumbens	nucleus accumbens	0.852862679469493
LatentSpace_1	10676	Nucleus accumbens	nucleus accumbens	0.798372163508154
LatentSpace_1	10692	Nucleus accumbens	nucleus accumbens	0.877790523424502
LatentSpace_1	10693	Nucleus accumbens	nucleus accumbens	0.861580271909103
LatentSpace_1	10694	Nucleus accumbens	nucleus accumbens	0.832997402396797
LatentSpace_1	10695	Nucleus accumbens	amygdala	0.830765441060018
LatentSpace_1	10696	Lateral septal complex	amygdala	0.812026014845968
LatentSpace_1	10697	Lateral septal complex	amygdala	0.82072824298019
LatentSpace_1	10698	Nucleus accumbens	amygdala	0.830243266944679
LatentSpace_1	10699	Nucleus accumbens	nucleus accumbens	0.832355168199807
LatentSpace_1	10700	Nucleus accumbens	nucleus accumbens	0.868780145358389
LatentSpace_1	10701	Nucleus accumbens	nucleus accumbens	0.881698891590158
LatentSpace_1	10718	Nucleus accumbens	nucleus accumbens	0.824038156975381
LatentSpace_1	10719	Nucleus accumbens	piriform cortex	0.823910742607341
LatentSpace_1	10720	Nucleus accumbens	piriform cortex	0.853242770701525
LatentSpace_1	10725	Nucleus accumbens	piriform cortex	0.83071415334552
LatentSpace_1	10726	Nucleus accumbens	nucleus accumbens	0.815633478304775
LatentSpace_1	10727	Nucleus accumbens	nucleus accumbens	0.815151418238033
LatentSpace_1	10744	Nucleus accumbens	piriform cortex	0.882000333570933
LatentSpace_1	10746	Nucleus accumbens	piriform cortex	0.840661389764638
LatentSpace_1	10752	Nucleus accumbens	piriform cortex	0.880774563984376
LatentSpace_1	10753	Nucleus accumbens	piriform cortex	0.861351759366298
LatentSpace_1	12052	Caudoputamen	nucleus accumbens	0.884038252393031
LatentSpace_1	12077	Caudoputamen	nucleus accumbens	0.889504338867766
LatentSpace_1	12078	Caudoputamen	nucleus accumbens	0.856558411483747
LatentSpace_1	12092	Caudoputamen	nucleus accumbens	0.809078713173641
LatentSpace_1	12093	Caudoputamen	nucleus accumbens	0.900248676956781
LatentSpace_1	12094	Caudoputamen	nucleus accumbens	0.928243137791906
LatentSpace_1	12095	Caudoputamen	nucleus accumbens	0.920371374321613
LatentSpace_1	12118	Caudoputamen	nucleus accumbens	0.92159079548205
LatentSpace_1	12119	Caudoputamen	nucleus accumbens	0.89270493798585
LatentSpace_1	12120	Caudoputamen	nucleus accumbens	0.829048719638878
LatentSpace_1	12132	Caudoputamen	nucleus accumbens	0.825265035817543
LatentSpace_1	12133	Caudoputamen	nucleus accumbens	0.902264087071966
LatentSpace_1	12134	Caudoputamen	nucleus accumbens	0.930453165325841
LatentSpace_1	12135	Caudoputamen	nucleus accumbens	0.937283852486713
LatentSpace_1	12156	Caudoputamen	nucleus accumbens	0.935628943528238
LatentSpace_1	12157	Caudoputamen	nucleus accumbens	0.929044458235207
LatentSpace_1	12158	Caudoputamen	nucleus accumbens	0.909512954945694
LatentSpace_1	12159	Caudoputamen	nucleus accumbens	0.862821096948437
LatentSpace_1	12170	Caudoputamen	nucleus accumbens	0.814137856381624
LatentSpace_1	12171	Caudoputamen	caudate nucleus	0.901937341635783
LatentSpace_1	12172	Caudoputamen	caudate nucleus	0.935180010688814
LatentSpace_1	12173	Caudoputamen	caudate nucleus	0.939237137907656
LatentSpace_1	12174	Caudoputamen	nucleus accumbens	0.931463561259919
LatentSpace_1	12193	Caudoputamen	nucleus accumbens	0.941289507124357
LatentSpace_1	12194	Caudoputamen	caudate nucleus	0.950096043971875
LatentSpace_1	12195	Caudoputamen	caudate nucleus	0.945903355662565
LatentSpace_1	12196	Caudoputamen	caudate nucleus	0.923919565429586
LatentSpace_1	12197	Caudoputamen	nucleus accumbens	0.862232208035464
LatentSpace_1	12208	Caudoputamen	nucleus accumbens	0.774820549812273
LatentSpace_1	12209	Caudoputamen	caudate nucleus	0.900211302205679
LatentSpace_1	12210	Caudoputamen	caudate nucleus	0.936811872092238
LatentSpace_1	12211	Caudoputamen	caudate nucleus	0.945782049731964
LatentSpace_1	12212	Caudoputamen	caudate nucleus	0.948103142548688
LatentSpace_1	12213	Caudoputamen	nucleus accumbens	0.937167547026139
LatentSpace_1	12232	Caudoputamen	nucleus accumbens	0.938546679903838
LatentSpace_1	12233	Caudoputamen	caudate nucleus	0.950295769419668
LatentSpace_1	12234	Caudoputamen	caudate nucleus	0.95350322399835
LatentSpace_1	12235	Caudoputamen	caudate nucleus	0.947731598418468
LatentSpace_1	12236	Caudoputamen	caudate nucleus	0.914904939756564
LatentSpace_1	12237	Caudoputamen	nucleus accumbens	0.817906877096657
LatentSpace_1	12249	Caudoputamen	caudate nucleus	0.862482414134198
LatentSpace_1	12250	Caudoputamen	caudate nucleus	0.91865009293021
LatentSpace_1	12251	Caudoputamen	caudate nucleus	0.933884416577329
LatentSpace_1	12252	Caudoputamen	caudate nucleus	0.946313483713692
LatentSpace_1	12253	Caudoputamen	caudate nucleus	0.949449822899251
LatentSpace_1	12254	Caudoputamen	caudate nucleus	0.946373876704278
LatentSpace_1	12255	Caudoputamen	nucleus accumbens	0.945211234677482
LatentSpace_1	12256	Caudoputamen	nucleus accumbens	0.931612562699112
LatentSpace_1	12257	Caudoputamen	nucleus accumbens	0.910863181071123
LatentSpace_1	12262	Caudoputamen	nucleus accumbens	0.930216205099412
LatentSpace_1	12263	Caudoputamen	nucleus accumbens	0.94167704323819
LatentSpace_1	12264	Caudoputamen	nucleus accumbens	0.941255730439559
LatentSpace_1	12265	Caudoputamen	caudate nucleus	0.940972846744134
LatentSpace_1	12266	Caudoputamen	caudate nucleus	0.951848508171105
LatentSpace_1	12267	Caudoputamen	caudate nucleus	0.954232710821422
LatentSpace_1	12268	Caudoputamen	caudate nucleus	0.941567883552962
LatentSpace_1	12269	Caudoputamen	nucleus accumbens	0.896908174872197
LatentSpace_1	12281	Caudoputamen	caudate nucleus	0.799662291625653
LatentSpace_1	12282	Caudoputamen	caudate nucleus	0.891749588455387
LatentSpace_1	12283	Caudoputamen	caudate nucleus	0.922896420497926
LatentSpace_1	12284	Caudoputamen	caudate nucleus	0.936593088316775
LatentSpace_1	12285	Caudoputamen	caudate nucleus	0.945388282356342
LatentSpace_1	12286	Caudoputamen	caudate nucleus	0.945121837545124
LatentSpace_1	12287	Caudoputamen	caudate nucleus	0.948291120769136
LatentSpace_1	12288	Caudoputamen	nucleus accumbens	0.950433190817987
LatentSpace_1	12289	Caudoputamen	nucleus accumbens	0.950348055222413
LatentSpace_1	12290	Caudoputamen	nucleus accumbens	0.949258365099788
LatentSpace_1	12291	Caudoputamen	nucleus accumbens	0.953281792601831
LatentSpace_1	12292	Caudoputamen	nucleus accumbens	0.955796946654045
LatentSpace_1	12293	Caudoputamen	nucleus accumbens	0.951762554947527
LatentSpace_1	12294	Caudoputamen	nucleus accumbens	0.946157835690856
LatentSpace_1	12295	Caudoputamen	caudate nucleus	0.955899014914081
LatentSpace_1	12296	Caudoputamen	caudate nucleus	0.954986066246839
LatentSpace_1	12297	Caudoputamen	caudate nucleus	0.940924005312056
LatentSpace_1	12298	Caudoputamen	nucleus accumbens	0.888808531813326
LatentSpace_1	12310	Caudoputamen	caudate nucleus	0.857358943475323
LatentSpace_1	12311	Caudoputamen	caudate nucleus	0.912937128717348
LatentSpace_1	12312	Caudoputamen	caudate nucleus	0.936782146711325
LatentSpace_1	12313	Caudoputamen	caudate nucleus	0.949005437092711
LatentSpace_1	12314	Caudoputamen	caudate nucleus	0.951344290514922
LatentSpace_1	12315	Caudoputamen	caudate nucleus	0.95270463665719
LatentSpace_1	12316	Caudoputamen	nucleus accumbens	0.95302165856039
LatentSpace_1	12317	Caudoputamen	nucleus accumbens	0.962583533924113
LatentSpace_1	12326	Caudoputamen	nucleus accumbens	0.958636489518616
LatentSpace_1	12327	Caudoputamen	nucleus accumbens	0.961457214353653
LatentSpace_1	12328	Caudoputamen	nucleus accumbens	0.959981027007186
LatentSpace_1	12329	Caudoputamen	nucleus accumbens	0.954802497525357
LatentSpace_1	12330	Caudoputamen	caudate nucleus	0.952371447255327
LatentSpace_1	12331	Caudoputamen	caudate nucleus	0.953113224773684
LatentSpace_1	12332	Caudoputamen	caudate nucleus	0.943233913337666
LatentSpace_1	12333	Caudoputamen	nucleus accumbens	0.913711781984247
LatentSpace_1	12334	Caudoputamen	nucleus accumbens	0.813748169619558
LatentSpace_1	12345	Caudoputamen	caudate nucleus	0.79155525333006
LatentSpace_1	12346	Caudoputamen	caudate nucleus	0.896905116685823
LatentSpace_1	12347	Caudoputamen	caudate nucleus	0.935293448985554
LatentSpace_1	12348	Caudoputamen	caudate nucleus	0.945135011720449
LatentSpace_1	12349	Caudoputamen	nucleus accumbens	0.947759689692565
LatentSpace_1	12350	Caudoputamen	nucleus accumbens	0.953382142860632
LatentSpace_1	12351	Caudoputamen	nucleus accumbens	0.958308852231751
LatentSpace_1	12352	Caudoputamen	nucleus accumbens	0.965386267236414
LatentSpace_1	12353	Caudoputamen	nucleus accumbens	0.958635280017194
LatentSpace_1	12362	Caudoputamen	nucleus accumbens	0.953419871711197
LatentSpace_1	12363	Caudoputamen	nucleus accumbens	0.961113852484253
LatentSpace_1	12364	Caudoputamen	nucleus accumbens	0.960937652337977
LatentSpace_1	12365	Caudoputamen	nucleus accumbens	0.959382198248381
LatentSpace_1	12366	Caudoputamen	nucleus accumbens	0.9557237369361
LatentSpace_1	12367	Caudoputamen	caudate nucleus	0.952369662362683
LatentSpace_1	12368	Caudoputamen	nucleus accumbens	0.946245448276266
LatentSpace_1	12369	Caudoputamen	nucleus accumbens	0.921383986752271
LatentSpace_1	12370	Caudoputamen	nucleus accumbens	0.845050104122133
LatentSpace_1	12382	Caudoputamen	nucleus accumbens	0.836893476841589
LatentSpace_1	12383	Caudoputamen	nucleus accumbens	0.909803822812625
LatentSpace_1	12384	Caudoputamen	caudate nucleus	0.936319661469314
LatentSpace_1	12385	Caudoputamen	caudate nucleus	0.943775839424003
LatentSpace_1	12386	Caudoputamen	nucleus accumbens	0.953477270405322
LatentSpace_1	12387	Caudoputamen	nucleus accumbens	0.96018145695254
LatentSpace_1	12388	Caudoputamen	nucleus accumbens	0.960521920817689
LatentSpace_1	12390	Nucleus accumbens	septal nuclei	0.855714417298549
LatentSpace_1	12391	Nucleus accumbens	septal nuclei	0.877170770810752
LatentSpace_1	12392	Lateral septal complex	septal nuclei	0.90979653000945
LatentSpace_1	12395	Lateral septal complex	septal nuclei	0.89778940951973
LatentSpace_1	12396	Nucleus accumbens	septal nuclei	0.86853761509237
LatentSpace_1	12397	Nucleus accumbens	nucleus accumbens	0.864414998221605
LatentSpace_1	12398	Nucleus accumbens	nucleus accumbens	0.911111659419278
LatentSpace_1	12399	Nucleus accumbens	nucleus accumbens	0.949706606271307
LatentSpace_1	12400	Caudoputamen	nucleus accumbens	0.955880806307308
LatentSpace_1	12401	Caudoputamen	nucleus accumbens	0.956771902923372
LatentSpace_1	12402	Caudoputamen	nucleus accumbens	0.956073778853491
LatentSpace_1	12403	Caudoputamen	nucleus accumbens	0.948359274441419
LatentSpace_1	12404	Caudoputamen	nucleus accumbens	0.923607744751813
LatentSpace_1	12405	Caudoputamen	nucleus accumbens	0.858924515323537
LatentSpace_1	12418	Caudoputamen	nucleus accumbens	0.849263831943487
LatentSpace_1	12419	Caudoputamen	nucleus accumbens	0.912117466139149
LatentSpace_1	12420	Caudoputamen	nucleus accumbens	0.933022966006271
LatentSpace_1	12421	Caudoputamen	nucleus accumbens	0.943862901350541
LatentSpace_1	12422	Caudoputamen	nucleus accumbens	0.948578410525241
LatentSpace_1	12423	Caudoputamen	nucleus accumbens	0.950171902334447
LatentSpace_1	12424	Nucleus accumbens	nucleus accumbens	0.890047976664068
LatentSpace_1	12425	Nucleus accumbens	nucleus accumbens	0.859929079493261
LatentSpace_1	12426	Lateral septal complex	nucleus accumbens	0.83467205777597
LatentSpace_1	12430	Lateral septal complex	septal nuclei	0.848894083222499
LatentSpace_1	12431	Nucleus accumbens	nucleus accumbens	0.845944946679562
LatentSpace_1	12432	Nucleus accumbens	nucleus accumbens	0.871044638631399
LatentSpace_1	12433	Nucleus accumbens	nucleus accumbens	0.908559852305839
LatentSpace_1	12434	Nucleus accumbens	nucleus accumbens	0.937334967759292
LatentSpace_1	12435	Caudoputamen	nucleus accumbens	0.943866027080174
LatentSpace_1	12436	Caudoputamen	nucleus accumbens	0.945070331586452
LatentSpace_1	12437	Caudoputamen	nucleus accumbens	0.939885397135696
LatentSpace_1	12438	Caudoputamen	nucleus accumbens	0.917427739566326
LatentSpace_1	12439	Caudoputamen	nucleus accumbens	0.843934152833933
LatentSpace_1	12452	Nucleus accumbens	nucleus accumbens	0.827123414657636
LatentSpace_1	12453	Caudoputamen	nucleus accumbens	0.89839748818847
LatentSpace_1	12454	Caudoputamen	nucleus accumbens	0.921853332575725
LatentSpace_1	12455	Caudoputamen	nucleus accumbens	0.935185851598477
LatentSpace_1	12456	Nucleus accumbens	nucleus accumbens	0.938749821347144
LatentSpace_1	12457	Nucleus accumbens	nucleus accumbens	0.905196256494725
LatentSpace_1	12458	Nucleus accumbens	nucleus accumbens	0.87201709785891
LatentSpace_1	12459	Nucleus accumbens	nucleus accumbens	0.847368416048107
LatentSpace_1	12460	Nucleus accumbens	nucleus accumbens	0.825971242094967
LatentSpace_1	12461	Lateral septal complex	septal nuclei	0.853571975191237
LatentSpace_1	12464	Lateral septal complex	septal nuclei	0.826768168189868
LatentSpace_1	12465	Nucleus accumbens	nucleus accumbens	0.836918099318258
LatentSpace_1	12466	Nucleus accumbens	nucleus accumbens	0.866713462969937
LatentSpace_1	12467	Nucleus accumbens	nucleus accumbens	0.896866896231652
LatentSpace_1	12468	Nucleus accumbens	nucleus accumbens	0.921835924140424
LatentSpace_1	12469	Nucleus accumbens	nucleus accumbens	0.93208300067702
LatentSpace_1	12470	Caudoputamen	nucleus accumbens	0.933380361649712
LatentSpace_1	12471	Caudoputamen	nucleus accumbens	0.926741317210691
LatentSpace_1	12472	Caudoputamen	nucleus accumbens	0.895289300267358
LatentSpace_1	12487	Nucleus accumbens	nucleus accumbens	0.864717443446477
LatentSpace_1	12488	Caudoputamen	nucleus accumbens	0.906837176733548
LatentSpace_1	12489	Nucleus accumbens	nucleus accumbens	0.921288922164445
LatentSpace_1	12490	Nucleus accumbens	nucleus accumbens	0.899749370234623
LatentSpace_1	12491	Nucleus accumbens	nucleus accumbens	0.871443604800305
LatentSpace_1	12492	Nucleus accumbens	nucleus accumbens	0.853174197340254
LatentSpace_1	12493	Nucleus accumbens	nucleus accumbens	0.815615040545367
LatentSpace_1	12494	Lateral septal complex	septal nuclei	0.821545718627894
LatentSpace_1	12495	Lateral septal complex	septal nuclei	0.854718117152598
LatentSpace_1	12496	Lateral septal complex	septal nuclei	0.838865068280208
LatentSpace_1	12497	Lateral septal complex	amygdala	0.811275931922691
LatentSpace_1	12498	Nucleus accumbens	nucleus accumbens	0.81503023991898
LatentSpace_1	12499	Nucleus accumbens	nucleus accumbens	0.86549845913693
LatentSpace_1	12500	Nucleus accumbens	nucleus accumbens	0.891752866963933
LatentSpace_1	12501	Nucleus accumbens	nucleus accumbens	0.908703250471686
LatentSpace_1	12502	Nucleus accumbens	nucleus accumbens	0.897035616109591
LatentSpace_1	12503	Nucleus accumbens	nucleus accumbens	0.855497825857997
LatentSpace_1	12504	Nucleus accumbens	parolfactory gyri	0.777499857015209
LatentSpace_1	12517	Nucleus accumbens	parolfactory gyri	0.764139279066301
LatentSpace_1	12518	Nucleus accumbens	nucleus accumbens	0.811866858615263
LatentSpace_1	12519	Nucleus accumbens	nucleus accumbens	0.892985773630909
LatentSpace_1	12520	Nucleus accumbens	nucleus accumbens	0.86183270714662
LatentSpace_1	12521	Nucleus accumbens	amygdala	0.828243293537462
LatentSpace_1	12522	Nucleus accumbens	amygdala	0.836454905204353
LatentSpace_1	12526	Lateral septal complex	amygdala	0.813817541639867
LatentSpace_1	12527	Nucleus accumbens	amygdala	0.829727443325312
LatentSpace_1	12528	Nucleus accumbens	nucleus accumbens	0.842202394270042
LatentSpace_1	12529	Nucleus accumbens	nucleus accumbens	0.883075914282031
LatentSpace_1	12530	Nucleus accumbens	nucleus accumbens	0.895336812963018
LatentSpace_1	12531	Nucleus accumbens	nucleus accumbens	0.776071227300705
LatentSpace_1	12546	Nucleus accumbens	nucleus accumbens	0.840894374667648
LatentSpace_1	12547	Nucleus accumbens	amygdala	0.824254921648788
LatentSpace_1	12548	Nucleus accumbens	piriform cortex	0.870065986304707
LatentSpace_1	12554	Nucleus accumbens	amygdala	0.822721935422801
LatentSpace_1	12555	Nucleus accumbens	nucleus accumbens	0.831233510204208
LatentSpace_1	12556	Nucleus accumbens	nucleus accumbens	0.839674612597932
LatentSpace_1	12571	Nucleus accumbens	piriform cortex	0.890159697222553
LatentSpace_1	12578	Nucleus accumbens	piriform cortex	0.874005751440075
LatentSpace_1	12579	Nucleus accumbens	piriform cortex	0.880237126830959
LatentSpace_1	12580	Nucleus accumbens	piriform cortex	0.852808004872227
LatentSpace_1	13885	Caudoputamen	nucleus accumbens	0.845061546657467
LatentSpace_1	13886	Caudoputamen	nucleus accumbens	0.905377640293038
LatentSpace_1	13887	Caudoputamen	nucleus accumbens	0.917566509202392
LatentSpace_1	13912	Caudoputamen	nucleus accumbens	0.923859370843848
LatentSpace_1	13913	Caudoputamen	nucleus accumbens	0.913937495128608
LatentSpace_1	13914	Caudoputamen	nucleus accumbens	0.864022338714848
LatentSpace_1	13928	Caudoputamen	nucleus accumbens	0.870064086322408
LatentSpace_1	13929	Caudoputamen	nucleus accumbens	0.915713789894879
LatentSpace_1	13930	Caudoputamen	nucleus accumbens	0.928424083067424
LatentSpace_1	13931	Caudoputamen	nucleus accumbens	0.917839043357964
LatentSpace_1	13955	Caudoputamen	nucleus accumbens	0.907972819107317
LatentSpace_1	13956	Caudoputamen	nucleus accumbens	0.929051684198107
LatentSpace_1	13957	Caudoputamen	nucleus accumbens	0.919724585642987
LatentSpace_1	13958	Caudoputamen	nucleus accumbens	0.885872923706072
LatentSpace_1	13959	Caudoputamen	nucleus accumbens	0.804484656694385
LatentSpace_1	13972	Caudoputamen	caudate nucleus	0.868066128189257
LatentSpace_1	13973	Caudoputamen	caudate nucleus	0.919752058976231
LatentSpace_1	13974	Caudoputamen	caudate nucleus	0.939949397168645
LatentSpace_1	13975	Caudoputamen	caudate nucleus	0.932805243883231
LatentSpace_1	13998	Caudoputamen	nucleus accumbens	0.925167305907716
LatentSpace_1	13999	Caudoputamen	caudate nucleus	0.937397629054442
LatentSpace_1	14000	Caudoputamen	caudate nucleus	0.920785573683723
LatentSpace_1	14001	Caudoputamen	caudate nucleus	0.887384410484658
LatentSpace_1	14013	Caudoputamen	caudate nucleus	0.861164901611723
LatentSpace_1	14014	Caudoputamen	caudate nucleus	0.923852339831796
LatentSpace_1	14015	Caudoputamen	caudate nucleus	0.946213927165636
LatentSpace_1	14016	Caudoputamen	caudate nucleus	0.951053613854602
LatentSpace_1	14017	Caudoputamen	caudate nucleus	0.920228990658697
LatentSpace_1	14035	Caudoputamen	caudate nucleus	0.932927500053814
LatentSpace_1	14036	Caudoputamen	caudate nucleus	0.955293497094715
LatentSpace_1	14037	Caudoputamen	caudate nucleus	0.953989632573401
LatentSpace_1	14038	Caudoputamen	caudate nucleus	0.939055211819906
LatentSpace_1	14039	Caudoputamen	caudate nucleus	0.894820439032529
LatentSpace_1	14051	Caudoputamen	caudate nucleus	0.834034868394171
LatentSpace_1	14052	Caudoputamen	caudate nucleus	0.91720341087992
LatentSpace_1	14053	Caudoputamen	caudate nucleus	0.941247413093709
LatentSpace_1	14054	Caudoputamen	caudate nucleus	0.951341813447462
LatentSpace_1	14055	Caudoputamen	caudate nucleus	0.951306555990023
LatentSpace_1	14056	Caudoputamen	caudate nucleus	0.939240167723098
LatentSpace_1	14071	Caudoputamen	nucleus accumbens	0.917862716595149
LatentSpace_1	14072	Caudoputamen	caudate nucleus	0.942486465382007
LatentSpace_1	14073	Caudoputamen	caudate nucleus	0.956566688399009
LatentSpace_1	14074	Caudoputamen	caudate nucleus	0.95973862836272
LatentSpace_1	14075	Caudoputamen	caudate nucleus	0.957287327163223
LatentSpace_1	14076	Caudoputamen	caudate nucleus	0.937729242344072
LatentSpace_1	14077	Caudoputamen	caudate nucleus	0.866513472741561
LatentSpace_1	14089	Caudoputamen	caudate nucleus	0.78274628581326
LatentSpace_1	14090	Caudoputamen	caudate nucleus	0.889631931987039
LatentSpace_1	14091	Caudoputamen	caudate nucleus	0.925980316837857
LatentSpace_1	14092	Caudoputamen	caudate nucleus	0.939587411878145
LatentSpace_1	14093	Caudoputamen	caudate nucleus	0.948610551760669
LatentSpace_1	14094	Caudoputamen	caudate nucleus	0.951664489860097
LatentSpace_1	14095	Caudoputamen	caudate nucleus	0.95285251791554
LatentSpace_1	14096	Caudoputamen	caudate nucleus	0.947865072440811
LatentSpace_1	14097	Caudoputamen	nucleus accumbens	0.942770671578872
LatentSpace_1	14106	Caudoputamen	nucleus accumbens	0.942440990496373
LatentSpace_1	14107	Caudoputamen	nucleus accumbens	0.944244258581372
LatentSpace_1	14108	Caudoputamen	caudate nucleus	0.943963699590722
LatentSpace_1	14109	Caudoputamen	caudate nucleus	0.949108697511912
LatentSpace_1	14110	Caudoputamen	caudate nucleus	0.957828141998988
LatentSpace_1	14111	Caudoputamen	caudate nucleus	0.957534943047568
LatentSpace_1	14112	Caudoputamen	caudate nucleus	0.95262222230994
LatentSpace_1	14113	Caudoputamen	caudate nucleus	0.922615214862826
LatentSpace_1	14114	Caudoputamen	nucleus accumbens	0.829189817926657
LatentSpace_1	14126	Caudoputamen	caudate nucleus	0.854796658241979
LatentSpace_1	14127	Caudoputamen	caudate nucleus	0.913269300214656
LatentSpace_1	14128	Caudoputamen	caudate nucleus	0.931630401954732
LatentSpace_1	14129	Caudoputamen	caudate nucleus	0.938609246438987
LatentSpace_1	14130	Caudoputamen	caudate nucleus	0.946502682039275
LatentSpace_1	14131	Caudoputamen	caudate nucleus	0.949109817513575
LatentSpace_1	14132	Caudoputamen	caudate nucleus	0.953548121608957
LatentSpace_1	14133	Caudoputamen	caudate nucleus	0.952713014432503
LatentSpace_1	14134	Caudoputamen	nucleus accumbens	0.958260426207665
LatentSpace_1	14139	Caudoputamen	nucleus accumbens	0.956755102829815
LatentSpace_1	14140	Caudoputamen	nucleus accumbens	0.955677883472968
LatentSpace_1	14141	Caudoputamen	nucleus accumbens	0.952763321320827
LatentSpace_1	14142	Caudoputamen	caudate nucleus	0.952206952668241
LatentSpace_1	14143	Caudoputamen	caudate nucleus	0.956222108560407
LatentSpace_1	14144	Caudoputamen	caudate nucleus	0.960738535509129
LatentSpace_1	14145	Caudoputamen	caudate nucleus	0.958716204171607
LatentSpace_1	14146	Caudoputamen	caudate nucleus	0.950255977469142
LatentSpace_1	14147	Caudoputamen	caudate nucleus	0.909752250794803
LatentSpace_1	14159	Caudoputamen	caudate nucleus	0.808568975220268
LatentSpace_1	14160	Caudoputamen	caudate nucleus	0.901919456344781
LatentSpace_1	14161	Caudoputamen	caudate nucleus	0.930937635982009
LatentSpace_1	14162	Caudoputamen	caudate nucleus	0.943192396712812
LatentSpace_1	14163	Caudoputamen	caudate nucleus	0.953521906185642
LatentSpace_1	14164	Caudoputamen	caudate nucleus	0.9569134921626
LatentSpace_1	14165	Caudoputamen	caudate nucleus	0.959334051487077
LatentSpace_1	14166	Caudoputamen	caudate nucleus	0.957175942143718
LatentSpace_1	14167	Caudoputamen	nucleus accumbens	0.962593147079175
LatentSpace_1	14171	Lateral septal complex	septal nuclei	0.929815431564121
LatentSpace_1	14177	Caudoputamen	nucleus accumbens	0.962607141805939
LatentSpace_1	14178	Caudoputamen	nucleus accumbens	0.958836059135279
LatentSpace_1	14179	Caudoputamen	caudate nucleus	0.960806781486392
LatentSpace_1	14180	Caudoputamen	caudate nucleus	0.963335848745882
LatentSpace_1	14181	Caudoputamen	caudate nucleus	0.961585901808417
LatentSpace_1	14182	Caudoputamen	caudate nucleus	0.960642023485291
LatentSpace_1	14183	Caudoputamen	caudate nucleus	0.952948958593246
LatentSpace_1	14184	Caudoputamen	caudate nucleus	0.932786799331601
LatentSpace_1	14185	Caudoputamen	nucleus accumbens	0.84786216916462
LatentSpace_1	14197	Caudoputamen	caudate nucleus	0.858728246197349
LatentSpace_1	14198	Caudoputamen	caudate nucleus	0.926265823455867
LatentSpace_1	14199	Caudoputamen	caudate nucleus	0.947941103988472
LatentSpace_1	14200	Caudoputamen	caudate nucleus	0.956067909161712
LatentSpace_1	14201	Caudoputamen	caudate nucleus	0.958006696127652
LatentSpace_1	14202	Caudoputamen	caudate nucleus	0.959955378277639
LatentSpace_1	14203	Caudoputamen	caudate nucleus	0.958632048157872
LatentSpace_1	14204	Caudoputamen	nucleus accumbens	0.963231852742692
LatentSpace_1	14205	Caudoputamen	nucleus accumbens	0.962577779056245
LatentSpace_1	14209	Lateral septal complex	septal nuclei	0.920710419586237
LatentSpace_1	14210	Lateral septal complex	septal nuclei	0.919618525452812
LatentSpace_1	14214	Lateral septal complex	septal nuclei	0.913903697799547
LatentSpace_1	14217	Caudoputamen	nucleus accumbens	0.960306561000947
LatentSpace_1	14218	Caudoputamen	nucleus accumbens	0.959869154113419
LatentSpace_1	14219	Caudoputamen	nucleus accumbens	0.957683484519385
LatentSpace_1	14220	Caudoputamen	nucleus accumbens	0.955872508217627
LatentSpace_1	14221	Caudoputamen	caudate nucleus	0.966047806597744
LatentSpace_1	14222	Caudoputamen	caudate nucleus	0.965069368375564
LatentSpace_1	14223	Caudoputamen	caudate nucleus	0.960658054200823
LatentSpace_1	14224	Caudoputamen	caudate nucleus	0.941188628030407
LatentSpace_1	14225	Caudoputamen	caudate nucleus	0.874348797502299
LatentSpace_1	14238	Caudoputamen	caudate nucleus	0.884415778331556
LatentSpace_1	14239	Caudoputamen	caudate nucleus	0.935328462376393
LatentSpace_1	14240	Caudoputamen	caudate nucleus	0.948172629048636
LatentSpace_1	14241	Caudoputamen	caudate nucleus	0.953378618431785
LatentSpace_1	14242	Caudoputamen	caudate nucleus	0.954256819509609
LatentSpace_1	14243	Caudoputamen	nucleus accumbens	0.95621923909093
LatentSpace_1	14244	Caudoputamen	nucleus accumbens	0.959366059467672
LatentSpace_1	14245	Caudoputamen	nucleus accumbens	0.958653100322339
LatentSpace_1	14248	Lateral septal complex	septal nuclei	0.883921379018451
LatentSpace_1	14249	Lateral septal complex	septal nuclei	0.906753212249924
LatentSpace_1	14252	Lateral septal complex	septal nuclei	0.898671126692614
LatentSpace_1	14253	Lateral septal complex	septal nuclei	0.878198433787116
LatentSpace_1	14254	Nucleus accumbens	septal nuclei	0.862835827068167
LatentSpace_1	14256	Caudoputamen	nucleus accumbens	0.948041183831286
LatentSpace_1	14257	Caudoputamen	nucleus accumbens	0.950544845624591
LatentSpace_1	14258	Caudoputamen	nucleus accumbens	0.952882801475337
LatentSpace_1	14259	Caudoputamen	nucleus accumbens	0.955215578488177
LatentSpace_1	14260	Caudoputamen	nucleus accumbens	0.956105868298456
LatentSpace_1	14261	Caudoputamen	caudate nucleus	0.960933316513524
LatentSpace_1	14262	Caudoputamen	caudate nucleus	0.957727678366093
LatentSpace_1	14263	Caudoputamen	caudate nucleus	0.937431701095664
LatentSpace_1	14264	Caudoputamen	nucleus accumbens	0.892452560562821
LatentSpace_1	14277	Caudoputamen	caudate nucleus	0.884257459566231
LatentSpace_1	14278	Caudoputamen	caudate nucleus	0.932510348733831
LatentSpace_1	14279	Caudoputamen	caudate nucleus	0.943155610220899
LatentSpace_1	14280	Caudoputamen	nucleus accumbens	0.94406866631821
LatentSpace_1	14281	Caudoputamen	nucleus accumbens	0.951193770117377
LatentSpace_1	14282	Caudoputamen	nucleus accumbens	0.955292316785311
LatentSpace_1	14283	Caudoputamen	nucleus accumbens	0.955995320464545
LatentSpace_1	14284	Nucleus accumbens	nucleus accumbens	0.942449939415097
LatentSpace_1	14285	Nucleus accumbens	nucleus accumbens	0.900356987166917
LatentSpace_1	14286	Nucleus accumbens	nucleus accumbens	0.855512870029194
LatentSpace_1	14287	Lateral septal complex	septal nuclei	0.847758306202442
LatentSpace_1	14288	Lateral septal complex	septal nuclei	0.883877228395966
LatentSpace_1	14291	Lateral septal complex	septal nuclei	0.872803679337501
LatentSpace_1	14292	Nucleus accumbens	septal nuclei	0.839686260044927
LatentSpace_1	14293	Nucleus accumbens	nucleus accumbens	0.872283747620714
LatentSpace_1	14294	Nucleus accumbens	nucleus accumbens	0.917539841250217
LatentSpace_1	14295	Nucleus accumbens	nucleus accumbens	0.94166225806292
LatentSpace_1	14296	Nucleus accumbens	nucleus accumbens	0.94354573769421
LatentSpace_1	14297	Caudoputamen	nucleus accumbens	0.944068379071379
LatentSpace_1	14298	Caudoputamen	nucleus accumbens	0.9486592281513
LatentSpace_1	14299	Caudoputamen	nucleus accumbens	0.951837718411476
LatentSpace_1	14300	Caudoputamen	nucleus accumbens	0.947549659561265
LatentSpace_1	14301	Caudoputamen	nucleus accumbens	0.932433569316552
LatentSpace_1	14302	Caudoputamen	nucleus accumbens	0.884814364452289
LatentSpace_1	14316	Caudoputamen	nucleus accumbens	0.876458978877763
LatentSpace_1	14317	Caudoputamen	nucleus accumbens	0.922766381281799
LatentSpace_1	14318	Caudoputamen	nucleus accumbens	0.933726796580024
LatentSpace_1	14319	Caudoputamen	nucleus accumbens	0.94474408786726
LatentSpace_1	14320	Caudoputamen	nucleus accumbens	0.950812704226805
LatentSpace_1	14321	Caudoputamen	nucleus accumbens	0.94588980984616
LatentSpace_1	14322	Nucleus accumbens	nucleus accumbens	0.927018677007836
LatentSpace_1	14323	Nucleus accumbens	nucleus accumbens	0.89215116118242
LatentSpace_1	14324	Nucleus accumbens	nucleus accumbens	0.852094707844452
LatentSpace_1	14325	Nucleus accumbens	septal nuclei	0.813395715310147
LatentSpace_1	14326	Lateral septal complex	septal nuclei	0.858009554926237
LatentSpace_1	14329	Lateral septal complex	septal nuclei	0.848572572423434
LatentSpace_1	14330	Nucleus accumbens	nucleus accumbens	0.828735260267092
LatentSpace_1	14331	Nucleus accumbens	nucleus accumbens	0.872248506793739
LatentSpace_1	14332	Nucleus accumbens	nucleus accumbens	0.905704669755882
LatentSpace_1	14333	Nucleus accumbens	nucleus accumbens	0.926813658958507
LatentSpace_1	14334	Nucleus accumbens	nucleus accumbens	0.934808340262395
LatentSpace_1	14335	Caudoputamen	nucleus accumbens	0.940462834459244
LatentSpace_1	14336	Caudoputamen	nucleus accumbens	0.945143181248704
LatentSpace_1	14337	Caudoputamen	nucleus accumbens	0.938381544926337
LatentSpace_1	14338	Caudoputamen	nucleus accumbens	0.91974786500969
LatentSpace_1	14339	Caudoputamen	nucleus accumbens	0.86253869996547
LatentSpace_1	14354	Caudoputamen	nucleus accumbens	0.847343114637521
LatentSpace_1	14355	Caudoputamen	nucleus accumbens	0.89809599689475
LatentSpace_1	14356	Caudoputamen	nucleus accumbens	0.92663470290741
LatentSpace_1	14357	Caudoputamen	nucleus accumbens	0.941216694317939
LatentSpace_1	14358	Nucleus accumbens	nucleus accumbens	0.939520857072929
LatentSpace_1	14359	Nucleus accumbens	nucleus accumbens	0.920372297977515
LatentSpace_1	14360	Nucleus accumbens	nucleus accumbens	0.885786065873611
LatentSpace_1	14361	Nucleus accumbens	nucleus accumbens	0.851973786936332
LatentSpace_1	14362	Nucleus accumbens	amygdala	0.813592891395711
LatentSpace_1	14363	Lateral septal complex	septal nuclei	0.794832086991137
LatentSpace_1	14366	Lateral septal complex	amygdala	0.811406015358372
LatentSpace_1	14367	Nucleus accumbens	amygdala	0.817507991098062
LatentSpace_1	14368	Nucleus accumbens	nucleus accumbens	0.859999621075501
LatentSpace_1	14369	Nucleus accumbens	nucleus accumbens	0.893529156435058
LatentSpace_1	14370	Nucleus accumbens	nucleus accumbens	0.915660275241784
LatentSpace_1	14371	Nucleus accumbens	nucleus accumbens	0.923187387941125
LatentSpace_1	14372	Caudoputamen	nucleus accumbens	0.925685444492822
LatentSpace_1	14373	Caudoputamen	nucleus accumbens	0.919108378488342
LatentSpace_1	14374	Caudoputamen	nucleus accumbens	0.889897824588254
LatentSpace_1	14375	Nucleus accumbens	nucleus accumbens	0.826099512174398
LatentSpace_1	14391	Nucleus accumbens	nucleus accumbens	0.853059776383733
LatentSpace_1	14392	Nucleus accumbens	nucleus accumbens	0.899518620809068
LatentSpace_1	14393	Nucleus accumbens	nucleus accumbens	0.914628926376667
LatentSpace_1	14394	Nucleus accumbens	nucleus accumbens	0.902862566880388
LatentSpace_1	14395	Nucleus accumbens	nucleus accumbens	0.860566945044781
LatentSpace_1	14396	Nucleus accumbens	amygdala	0.836891651596947
LatentSpace_1	14397	Nucleus accumbens	amygdala	0.835188503311511
LatentSpace_1	14402	Nucleus accumbens	amygdala	0.828615708654813
LatentSpace_1	14403	Nucleus accumbens	nucleus accumbens	0.835832837520906
LatentSpace_1	14404	Nucleus accumbens	nucleus accumbens	0.885201239162828
LatentSpace_1	14405	Nucleus accumbens	nucleus accumbens	0.905365316406424
LatentSpace_1	14406	Nucleus accumbens	nucleus accumbens	0.896047990927407
LatentSpace_1	14407	Nucleus accumbens	nucleus accumbens	0.867530766516921
LatentSpace_1	14408	Nucleus accumbens	nucleus accumbens	0.828616692380166
LatentSpace_1	14425	Nucleus accumbens	nucleus accumbens	0.854018415563364
LatentSpace_1	14426	Nucleus accumbens	amygdala	0.833458251268046
LatentSpace_1	14427	Nucleus accumbens	piriform cortex	0.873024234861387
LatentSpace_1	14434	Nucleus accumbens	piriform cortex	0.833223669608982
LatentSpace_1	14435	Nucleus accumbens	nucleus accumbens	0.826889307076479
LatentSpace_1	14436	Nucleus accumbens	nucleus accumbens	0.853977577906838
LatentSpace_1	14437	Nucleus accumbens	piriform cortex	0.771453286711029
LatentSpace_1	15608	Caudoputamen	amygdala	0.892175106929443
LatentSpace_1	15653	Caudoputamen	nucleus accumbens	0.886390920787117
LatentSpace_1	15654	Caudoputamen	nucleus accumbens	0.906850284485525
LatentSpace_1	15694	Caudoputamen	nucleus accumbens	0.813054006636125
LatentSpace_1	15695	Caudoputamen	nucleus accumbens	0.878786976382819
LatentSpace_1	15696	Caudoputamen	nucleus accumbens	0.914999576993334
LatentSpace_1	15721	Caudoputamen	nucleus accumbens	0.922632848853969
LatentSpace_1	15722	Caudoputamen	nucleus accumbens	0.89403695983121
LatentSpace_1	15723	Caudoputamen	nucleus accumbens	0.82936569481906
LatentSpace_1	15737	Caudoputamen	nucleus accumbens	0.837632086040964
LatentSpace_1	15738	Caudoputamen	caudate nucleus	0.892421018501725
LatentSpace_1	15739	Caudoputamen	caudate nucleus	0.920124540478395
LatentSpace_1	15740	Caudoputamen	nucleus accumbens	0.915241723301462
LatentSpace_1	15759	Caudoputamen	nucleus accumbens	0.921242346353107
LatentSpace_1	15760	Caudoputamen	nucleus accumbens	0.929431718059497
LatentSpace_1	15761	Caudoputamen	nucleus accumbens	0.910285736120291
LatentSpace_1	15762	Caudoputamen	nucleus accumbens	0.850155193700306
LatentSpace_1	15774	Caudoputamen	caudate nucleus	0.838449143732699
LatentSpace_1	15775	Caudoputamen	caudate nucleus	0.907614515775767
LatentSpace_1	15776	Caudoputamen	caudate nucleus	0.93394928042353
LatentSpace_1	15777	Caudoputamen	caudate nucleus	0.929413378647319
LatentSpace_1	15778	Caudoputamen	nucleus accumbens	0.89064285074504
LatentSpace_1	15799	Caudoputamen	caudate nucleus	0.926201048077892
LatentSpace_1	15800	Caudoputamen	caudate nucleus	0.931180048084031
LatentSpace_1	15801	Caudoputamen	nucleus accumbens	0.90847944514423
LatentSpace_1	15802	Caudoputamen	nucleus accumbens	0.851884900113924
LatentSpace_1	15814	Caudoputamen	caudate nucleus	0.817667933507118
LatentSpace_1	15815	Caudoputamen	caudate nucleus	0.907403060175415
LatentSpace_1	15816	Caudoputamen	caudate nucleus	0.934759658150725
LatentSpace_1	15817	Caudoputamen	caudate nucleus	0.942475649480732
LatentSpace_1	15818	Caudoputamen	caudate nucleus	0.92151645574178
LatentSpace_1	15841	Caudoputamen	caudate nucleus	0.914255842043333
LatentSpace_1	15842	Caudoputamen	caudate nucleus	0.942045818357634
LatentSpace_1	15843	Caudoputamen	caudate nucleus	0.936867387919219
LatentSpace_1	15844	Caudoputamen	caudate nucleus	0.908495931586727
LatentSpace_1	15845	Caudoputamen	caudate nucleus	0.827661334128545
LatentSpace_1	15859	Caudoputamen	caudate nucleus	0.893826509596963
LatentSpace_1	15860	Caudoputamen	caudate nucleus	0.935987143975127
LatentSpace_1	15861	Caudoputamen	caudate nucleus	0.949727527530154
LatentSpace_1	15862	Caudoputamen	caudate nucleus	0.949046332310697
LatentSpace_1	15863	Caudoputamen	putamen	0.916855609240862
LatentSpace_1	15879	Caudoputamen	caudate nucleus	0.927449328521387
LatentSpace_1	15880	Caudoputamen	caudate nucleus	0.952738313701938
LatentSpace_1	15881	Caudoputamen	caudate nucleus	0.953886578724184
LatentSpace_1	15882	Caudoputamen	caudate nucleus	0.945454367530743
LatentSpace_1	15883	Caudoputamen	caudate nucleus	0.913123281297826
LatentSpace_1	15884	Caudoputamen	caudate nucleus	0.805328384089377
LatentSpace_1	15897	Caudoputamen	caudate nucleus	0.868911535024376
LatentSpace_1	15898	Caudoputamen	caudate nucleus	0.927030155868425
LatentSpace_1	15899	Caudoputamen	caudate nucleus	0.942102757522661
LatentSpace_1	15900	Caudoputamen	caudate nucleus	0.951886885842463
LatentSpace_1	15901	Caudoputamen	caudate nucleus	0.950738022802067
LatentSpace_1	15902	Caudoputamen	caudate nucleus	0.938655133475418
LatentSpace_1	15918	Caudoputamen	nucleus accumbens	0.908565801321849
LatentSpace_1	15919	Caudoputamen	caudate nucleus	0.942882906571102
LatentSpace_1	15920	Caudoputamen	caudate nucleus	0.956835717661822
LatentSpace_1	15921	Caudoputamen	caudate nucleus	0.958001465547549
LatentSpace_1	15922	Caudoputamen	caudate nucleus	0.954902635313715
LatentSpace_1	15923	Caudoputamen	caudate nucleus	0.94191667182782
LatentSpace_1	15924	Caudoputamen	caudate nucleus	0.888959163256087
LatentSpace_1	15937	Caudoputamen	caudate nucleus	0.819409709554416
LatentSpace_1	15938	Caudoputamen	caudate nucleus	0.904215016551554
LatentSpace_1	15939	Caudoputamen	caudate nucleus	0.931390311553407
LatentSpace_1	15940	Caudoputamen	caudate nucleus	0.942247329160429
LatentSpace_1	15941	Caudoputamen	caudate nucleus	0.947664179952391
LatentSpace_1	15942	Caudoputamen	caudate nucleus	0.950757071073059
LatentSpace_1	15943	Caudoputamen	caudate nucleus	0.95287277257295
LatentSpace_1	15944	Caudoputamen	caudate nucleus	0.95228382901674
LatentSpace_1	15945	Caudoputamen	nucleus accumbens	0.940201857199433
LatentSpace_1	15954	Caudoputamen	nucleus accumbens	0.937924707614292
LatentSpace_1	15955	Caudoputamen	caudate nucleus	0.942539021149068
LatentSpace_1	15956	Caudoputamen	caudate nucleus	0.946919819003339
LatentSpace_1	15957	Caudoputamen	caudate nucleus	0.953496247803022
LatentSpace_1	15958	Caudoputamen	caudate nucleus	0.958337466730297
LatentSpace_1	15959	Caudoputamen	caudate nucleus	0.955745293832281
LatentSpace_1	15960	Caudoputamen	caudate nucleus	0.949948794050755
LatentSpace_1	15961	Caudoputamen	caudate nucleus	0.928341597235743
LatentSpace_1	15962	Caudoputamen	caudate nucleus	0.846129651669953
LatentSpace_1	15974	Caudoputamen	claustrum	0.789410738951997
LatentSpace_1	15975	Caudoputamen	caudate nucleus	0.875316297246959
LatentSpace_1	15976	Caudoputamen	caudate nucleus	0.925810205608525
LatentSpace_1	15977	Caudoputamen	caudate nucleus	0.93720622493891
LatentSpace_1	15978	Caudoputamen	caudate nucleus	0.941188520640561
LatentSpace_1	15979	Caudoputamen	caudate nucleus	0.946556849558572
LatentSpace_1	15980	Caudoputamen	caudate nucleus	0.95202902878139
LatentSpace_1	15981	Caudoputamen	caudate nucleus	0.955934081432087
LatentSpace_1	15982	Caudoputamen	caudate nucleus	0.954616833736734
LatentSpace_1	15983	Caudoputamen	nucleus accumbens	0.959994677622464
LatentSpace_1	15992	Caudoputamen	nucleus accumbens	0.960786116835996
LatentSpace_1	15993	Caudoputamen	nucleus accumbens	0.953861225733644
LatentSpace_1	15994	Caudoputamen	caudate nucleus	0.957906645294506
LatentSpace_1	15995	Caudoputamen	caudate nucleus	0.958128713321425
LatentSpace_1	15996	Caudoputamen	caudate nucleus	0.957851751936698
LatentSpace_1	15997	Caudoputamen	caudate nucleus	0.960107544859093
LatentSpace_1	15998	Caudoputamen	caudate nucleus	0.956531465671249
LatentSpace_1	15999	Caudoputamen	caudate nucleus	0.947323445858201
LatentSpace_1	16000	Caudoputamen	caudate nucleus	0.917326906988266
LatentSpace_1	16001	Caudoputamen	claustrum	0.796043249793805
LatentSpace_1	16013	Caudoputamen	caudate nucleus	0.850811355403821
LatentSpace_1	16014	Caudoputamen	caudate nucleus	0.920907937806808
LatentSpace_1	16015	Caudoputamen	caudate nucleus	0.940211565532641
LatentSpace_1	16016	Caudoputamen	caudate nucleus	0.946992197081086
LatentSpace_1	16017	Caudoputamen	caudate nucleus	0.954514405250669
LatentSpace_1	16018	Caudoputamen	caudate nucleus	0.958369471855028
LatentSpace_1	16019	Caudoputamen	caudate nucleus	0.960080374537154
LatentSpace_1	16020	Caudoputamen	caudate nucleus	0.959821203193343
LatentSpace_1	16021	Caudoputamen	nucleus accumbens	0.961627491404433
LatentSpace_1	16024	Lateral septal complex	septal nuclei	0.928100806016228
LatentSpace_1	16025	Lateral septal complex	septal nuclei	0.933793418233473
LatentSpace_1	16026	Lateral septal complex	septal nuclei	0.930317001496035
LatentSpace_1	16030	Lateral septal complex	septal nuclei	0.928606841810221
LatentSpace_1	16031	Lateral septal complex	septal nuclei	0.920132528850987
LatentSpace_1	16034	Caudoputamen	nucleus accumbens	0.962607030073339
LatentSpace_1	16035	Caudoputamen	caudate nucleus	0.960004149644069
LatentSpace_1	16036	Caudoputamen	caudate nucleus	0.963838338790904
LatentSpace_1	16037	Caudoputamen	caudate nucleus	0.964274018786955
LatentSpace_1	16038	Caudoputamen	caudate nucleus	0.96376291829788
LatentSpace_1	16039	Caudoputamen	caudate nucleus	0.959579770924576
LatentSpace_1	16040	Caudoputamen	caudate nucleus	0.951475465283897
LatentSpace_1	16041	Caudoputamen	caudate nucleus	0.933150414525789
LatentSpace_1	16042	Caudoputamen	caudate nucleus	0.860934054945335
LatentSpace_1	16055	Caudoputamen	caudate nucleus	0.877357420845898
LatentSpace_1	16056	Caudoputamen	caudate nucleus	0.931002265903061
LatentSpace_1	16057	Caudoputamen	caudate nucleus	0.951583253658052
LatentSpace_1	16058	Caudoputamen	caudate nucleus	0.959385124859383
LatentSpace_1	16059	Caudoputamen	caudate nucleus	0.961854935908177
LatentSpace_1	16060	Caudoputamen	caudate nucleus	0.962322638438012
LatentSpace_1	16061	Caudoputamen	caudate nucleus	0.960407108971719
LatentSpace_1	16062	Caudoputamen	caudate nucleus	0.955992877075102
LatentSpace_1	16063	Caudoputamen	nucleus accumbens	0.962739393723968
LatentSpace_1	16064	Caudoputamen	nucleus accumbens	0.942268349925184
LatentSpace_1	16066	Lateral septal complex	septal nuclei	0.913791721430298
LatentSpace_1	16067	Lateral septal complex	septal nuclei	0.915766449386888
LatentSpace_1	16068	Lateral septal complex	septal nuclei	0.918687098380997
LatentSpace_1	16072	Lateral septal complex	septal nuclei	0.91267050570583
LatentSpace_1	16073	Lateral septal complex	septal nuclei	0.906702114309202
LatentSpace_1	16075	Caudoputamen	nucleus accumbens	0.957188791526776
LatentSpace_1	16076	Caudoputamen	nucleus accumbens	0.965957282745782
LatentSpace_1	16077	Caudoputamen	nucleus accumbens	0.958650163571431
LatentSpace_1	16078	Caudoputamen	nucleus accumbens	0.954288613869101
LatentSpace_1	16079	Caudoputamen	caudate nucleus	0.95875689199397
LatentSpace_1	16080	Caudoputamen	caudate nucleus	0.964144275866355
LatentSpace_1	16081	Caudoputamen	caudate nucleus	0.965448229141844
LatentSpace_1	16082	Caudoputamen	caudate nucleus	0.962118652811117
LatentSpace_1	16083	Caudoputamen	caudate nucleus	0.940598743453022
LatentSpace_1	16084	Caudoputamen	caudate nucleus	0.885622872885898
LatentSpace_1	16097	Caudoputamen	claustrum	0.816196663298604
LatentSpace_1	16098	Caudoputamen	caudate nucleus	0.901611090518877
LatentSpace_1	16099	Caudoputamen	caudate nucleus	0.945922241442188
LatentSpace_1	16100	Caudoputamen	caudate nucleus	0.952372919672212
LatentSpace_1	16101	Caudoputamen	caudate nucleus	0.955576624635155
LatentSpace_1	16102	Caudoputamen	caudate nucleus	0.956418399381094
LatentSpace_1	16103	Caudoputamen	caudate nucleus	0.955945492753993
LatentSpace_1	16104	Caudoputamen	nucleus accumbens	0.953340887824995
LatentSpace_1	16105	Caudoputamen	nucleus accumbens	0.960416471488852
LatentSpace_1	16106	Caudoputamen	nucleus accumbens	0.956275193952305
LatentSpace_1	16107	Lateral septal complex	septal nuclei	0.881954076619693
LatentSpace_1	16108	Lateral septal complex	septal nuclei	0.886563977761197
LatentSpace_1	16109	Lateral septal complex	septal nuclei	0.906767342651144
LatentSpace_1	16112	Lateral septal complex	septal nuclei	0.90158401859971
LatentSpace_1	16113	Lateral septal complex	septal nuclei	0.886238511894528
LatentSpace_1	16114	Lateral septal complex	septal nuclei	0.870796075300465
LatentSpace_1	16116	Caudoputamen	nucleus accumbens	0.953242396791008
LatentSpace_1	16117	Caudoputamen	nucleus accumbens	0.958199941358966
LatentSpace_1	16118	Caudoputamen	nucleus accumbens	0.957437386701212
LatentSpace_1	16119	Caudoputamen	nucleus accumbens	0.956030818739176
LatentSpace_1	16120	Caudoputamen	caudate nucleus	0.95396392377149
LatentSpace_1	16121	Caudoputamen	caudate nucleus	0.96341120062451
LatentSpace_1	16122	Caudoputamen	caudate nucleus	0.961907469092026
LatentSpace_1	16123	Caudoputamen	caudate nucleus	0.945748895859337
LatentSpace_1	16124	Caudoputamen	caudate nucleus	0.894896891756863
LatentSpace_1	16138	Caudoputamen	claustrum	0.819988140713043
LatentSpace_1	16139	Caudoputamen	caudate nucleus	0.905630759528531
LatentSpace_1	16140	Caudoputamen	caudate nucleus	0.943916372805203
LatentSpace_1	16141	Caudoputamen	caudate nucleus	0.949364646383151
LatentSpace_1	16142	Caudoputamen	caudate nucleus	0.949120794431224
LatentSpace_1	16143	Caudoputamen	caudate nucleus	0.948343867367407
LatentSpace_1	16144	Caudoputamen	nucleus accumbens	0.953309884542186
LatentSpace_1	16145	Caudoputamen	nucleus accumbens	0.961489073156418
LatentSpace_1	16146	Caudoputamen	nucleus accumbens	0.957274313272205
LatentSpace_1	16147	Nucleus accumbens	nucleus accumbens	0.851637312782042
LatentSpace_1	16148	Lateral septal complex	septal nuclei	0.861898442433727
LatentSpace_1	16149	Lateral septal complex	septal nuclei	0.889543996101686
LatentSpace_1	16152	Lateral septal complex	septal nuclei	0.886594504707639
LatentSpace_1	16153	Lateral septal complex	septal nuclei	0.859524358754893
LatentSpace_1	16154	Lateral septal complex	nucleus accumbens	0.859728116971709
LatentSpace_1	16155	Nucleus accumbens	nucleus accumbens	0.91852261121041
LatentSpace_1	16156	Caudoputamen	nucleus accumbens	0.948618015089066
LatentSpace_1	16157	Caudoputamen	nucleus accumbens	0.954334464724484
LatentSpace_1	16158	Caudoputamen	nucleus accumbens	0.954003942802131
LatentSpace_1	16159	Caudoputamen	nucleus accumbens	0.954825176531928
LatentSpace_1	16160	Caudoputamen	nucleus accumbens	0.953276295028959
LatentSpace_1	16161	Caudoputamen	caudate nucleus	0.952423869557254
LatentSpace_1	16162	Caudoputamen	caudate nucleus	0.939683126521206
LatentSpace_1	16163	Caudoputamen	nucleus accumbens	0.892340364355669
LatentSpace_1	16177	Caudoputamen	claustrum	0.848616298327045
LatentSpace_1	16178	Caudoputamen	caudate nucleus	0.895229151624451
LatentSpace_1	16179	Caudoputamen	caudate nucleus	0.93239620679026
LatentSpace_1	16180	Caudoputamen	nucleus accumbens	0.938794738785755
LatentSpace_1	16181	Caudoputamen	nucleus accumbens	0.948717739428988
LatentSpace_1	16182	Caudoputamen	nucleus accumbens	0.95397851928808
LatentSpace_1	16183	Caudoputamen	nucleus accumbens	0.955617659142332
LatentSpace_1	16184	Caudoputamen	nucleus accumbens	0.94781012178363
LatentSpace_1	16185	Nucleus accumbens	nucleus accumbens	0.911748772919991
LatentSpace_1	16186	Nucleus accumbens	nucleus accumbens	0.862441403153736
LatentSpace_1	16187	Lateral septal complex	septal nuclei	0.832317443286908
LatentSpace_1	16188	Lateral septal complex	septal nuclei	0.857815625755281
LatentSpace_1	16189	Lateral septal complex	septal nuclei	0.879811142271033
LatentSpace_1	16190	Lateral septal complex	septal nuclei	0.873149275284285
LatentSpace_1	16191	Lateral septal complex	septal nuclei	0.851763014588165
LatentSpace_1	16192	Lateral septal complex	amygdala	0.830849838369115
LatentSpace_1	16193	Nucleus accumbens	nucleus accumbens	0.863666882379359
LatentSpace_1	16194	Nucleus accumbens	nucleus accumbens	0.913805121663904
LatentSpace_1	16195	Caudoputamen	nucleus accumbens	0.938152135906482
LatentSpace_1	16196	Caudoputamen	nucleus accumbens	0.947101393785799
LatentSpace_1	16197	Caudoputamen	nucleus accumbens	0.947913496947698
LatentSpace_1	16198	Caudoputamen	nucleus accumbens	0.949063154700237
LatentSpace_1	16199	Caudoputamen	nucleus accumbens	0.944484522338763
LatentSpace_1	16200	Caudoputamen	nucleus accumbens	0.925543978700578
LatentSpace_1	16201	Caudoputamen	nucleus accumbens	0.878599960531323
LatentSpace_1	16202	Caudoputamen	claustrum	0.869480027273113
LatentSpace_1	16217	Caudoputamen	nucleus accumbens	0.857884280364802
LatentSpace_1	16218	Caudoputamen	nucleus accumbens	0.906707170141241
LatentSpace_1	16219	Caudoputamen	nucleus accumbens	0.934135952131179
LatentSpace_1	16220	Caudoputamen	nucleus accumbens	0.951471865534825
LatentSpace_1	16221	Caudoputamen	nucleus accumbens	0.951053310887513
LatentSpace_1	16222	Nucleus accumbens	nucleus accumbens	0.936345641047606
LatentSpace_1	16223	Nucleus accumbens	nucleus accumbens	0.901567803658955
LatentSpace_1	16224	Nucleus accumbens	nucleus accumbens	0.851004413039064
LatentSpace_1	16225	Lateral septal complex	amygdala	0.810620815526344
LatentSpace_1	16231	Nucleus accumbens	nucleus accumbens	0.853768063130049
LatentSpace_1	16232	Nucleus accumbens	nucleus accumbens	0.906825669221242
LatentSpace_1	16233	Nucleus accumbens	nucleus accumbens	0.929235440694744
LatentSpace_1	16234	Caudoputamen	nucleus accumbens	0.935841288394233
LatentSpace_1	16235	Caudoputamen	nucleus accumbens	0.934804523112061
LatentSpace_1	16236	Caudoputamen	nucleus accumbens	0.92821168747765
LatentSpace_1	16237	Caudoputamen	nucleus accumbens	0.894149544701348
LatentSpace_1	16238	Caudoputamen	nucleus accumbens	0.833707688932298
LatentSpace_1	16239	Caudoputamen	claustrum	0.890694951830735
LatentSpace_1	16254	Caudoputamen	claustrum	0.815685323659549
LatentSpace_1	16255	Caudoputamen	nucleus accumbens	0.870219054041683
LatentSpace_1	16256	Caudoputamen	nucleus accumbens	0.91432784244451
LatentSpace_1	16257	Nucleus accumbens	nucleus accumbens	0.923319249174974
LatentSpace_1	16258	Nucleus accumbens	nucleus accumbens	0.909023690711561
LatentSpace_1	16259	Nucleus accumbens	nucleus accumbens	0.867928846569519
LatentSpace_1	16260	Nucleus accumbens	amygdala	0.823087400285779
LatentSpace_1	16265	Nucleus accumbens	nucleus accumbens	0.821013330284653
LatentSpace_1	16266	Nucleus accumbens	nucleus accumbens	0.881215234006533
LatentSpace_1	16267	Nucleus accumbens	nucleus accumbens	0.905263743955941
LatentSpace_1	16268	Nucleus accumbens	nucleus accumbens	0.903619527804766
LatentSpace_1	16269	Nucleus accumbens	nucleus accumbens	0.885238405259653
LatentSpace_1	16270	Caudoputamen	nucleus accumbens	0.845586474610161
LatentSpace_1	16288	Nucleus accumbens	claustrum	0.814843536237632
LatentSpace_1	16289	Nucleus accumbens	nucleus accumbens	0.790122672705302
LatentSpace_1	16290	Nucleus accumbens	nucleus accumbens	0.850837847549954
LatentSpace_1	16291	Nucleus accumbens	nucleus accumbens	0.855031200254631
LatentSpace_1	16292	Nucleus accumbens	amygdala	0.825591790995682
LatentSpace_1	16293	Nucleus accumbens	piriform cortex	0.854300444311681
LatentSpace_1	16300	Nucleus accumbens	piriform cortex	0.828558015072561
LatentSpace_1	16301	Nucleus accumbens	nucleus accumbens	0.81701596149394
LatentSpace_1	16302	Nucleus accumbens	nucleus accumbens	0.849708776356709
LatentSpace_1	16303	Nucleus accumbens	nucleus accumbens	0.818832965384927
LatentSpace_1	16304	Nucleus accumbens	parolfactory gyri	0.788945278566643
LatentSpace_1	17391	Caudoputamen	amygdala	0.901172117711027
LatentSpace_1	17392	Caudoputamen	amygdala	0.865625112922541
LatentSpace_1	17432	Caudoputamen	nucleus accumbens	0.912407508880627
LatentSpace_1	17433	Caudoputamen	nucleus accumbens	0.932732791074771
LatentSpace_1	17458	Caudoputamen	nucleus accumbens	0.891121846791053
LatentSpace_1	17459	Caudoputamen	amygdala	0.897926671404475
LatentSpace_1	17474	Caudoputamen	nucleus accumbens	0.90632714318296
LatentSpace_1	17475	Caudoputamen	nucleus accumbens	0.941840360410424
LatentSpace_1	17502	Caudoputamen	nucleus accumbens	0.914654781557872
LatentSpace_1	17503	Caudoputamen	nucleus accumbens	0.859399041838234
LatentSpace_1	17518	Caudoputamen	nucleus accumbens	0.891779319502821
LatentSpace_1	17519	Caudoputamen	nucleus accumbens	0.927189987541113
LatentSpace_1	17548	Caudoputamen	nucleus accumbens	0.906714876981922
LatentSpace_1	17549	Caudoputamen	nucleus accumbens	0.852443670612537
LatentSpace_1	17564	Caudoputamen	caudate nucleus	0.881526481204165
LatentSpace_1	17565	Caudoputamen	caudate nucleus	0.919803728293699
LatentSpace_1	17566	Caudoputamen	nucleus accumbens	0.916432294409701
LatentSpace_1	17591	Caudoputamen	nucleus accumbens	0.919939682463944
LatentSpace_1	17592	Caudoputamen	nucleus accumbens	0.912073465180652
LatentSpace_1	17593	Caudoputamen	nucleus accumbens	0.878271938874223
LatentSpace_1	17594	Caudoputamen	claustrum	0.807843605835833
LatentSpace_1	17607	Caudoputamen	caudate nucleus	0.893991175605466
LatentSpace_1	17608	Caudoputamen	caudate nucleus	0.925264420398348
LatentSpace_1	17609	Caudoputamen	caudate nucleus	0.93408233677704
LatentSpace_1	17610	Caudoputamen	caudate nucleus	0.898329269568264
LatentSpace_1	17635	Caudoputamen	nucleus accumbens	0.909754145531847
LatentSpace_1	17636	Caudoputamen	caudate nucleus	0.936875984681648
LatentSpace_1	17637	Caudoputamen	caudate nucleus	0.931745125242257
LatentSpace_1	17638	Caudoputamen	caudate nucleus	0.888643664837888
LatentSpace_1	17639	Caudoputamen	claustrum	0.808939940010274
LatentSpace_1	17653	Caudoputamen	caudate nucleus	0.882846409008625
LatentSpace_1	17654	Caudoputamen	caudate nucleus	0.922929183087407
LatentSpace_1	17655	Caudoputamen	caudate nucleus	0.935288282962315
LatentSpace_1	17656	Caudoputamen	caudate nucleus	0.924714040445258
LatentSpace_1	17679	Caudoputamen	caudate nucleus	0.92966005425334
LatentSpace_1	17680	Caudoputamen	caudate nucleus	0.946061680011946
LatentSpace_1	17681	Caudoputamen	caudate nucleus	0.935169013353006
LatentSpace_1	17682	Caudoputamen	caudate nucleus	0.88578012872843
LatentSpace_1	17695	Caudoputamen	caudate nucleus	0.857543232598411
LatentSpace_1	17696	Caudoputamen	caudate nucleus	0.923113479264483
LatentSpace_1	17697	Caudoputamen	caudate nucleus	0.938758412206296
LatentSpace_1	17698	Caudoputamen	caudate nucleus	0.943440166735224
LatentSpace_1	17699	Caudoputamen	caudate nucleus	0.922586167608653
LatentSpace_1	17723	Caudoputamen	caudate nucleus	0.94218511265153
LatentSpace_1	17724	Caudoputamen	caudate nucleus	0.945053403266527
LatentSpace_1	17725	Caudoputamen	caudate nucleus	0.928001386337124
[truncated: 771,001 more rows]
