# Supplementary material for: Whole-brain comparison of rodent and human brains using spatial transcriptomics
Source: eLife. 2022 Nov 7;11:e79418. doi: 10.7554/eLife.79418 (PMC9708081; doi:10.7554/eLife.79418)
Supplement: Figure 6—source data 4. [file elife-79418-fig6-data4.csv]

Data	VoxelID	MouseRegion	TopHumanRegion	MaxCorrelation
LatentSpace_167	23803	Caudoputamen	caudate nucleus	0.976753325981149
LatentSpace_167	23804	Caudoputamen	caudate nucleus	0.970537311126443
LatentSpace_167	23805	Caudoputamen	caudate nucleus	0.967981822992137
LatentSpace_167	23806	Caudoputamen	caudate nucleus	0.967994889413236
LatentSpace_167	23807	Caudoputamen	caudate nucleus	0.956286659959435
LatentSpace_167	23808	Caudoputamen	caudate nucleus	0.933435949508147
LatentSpace_167	23809	Caudoputamen	caudate nucleus	0.882023381255178
LatentSpace_167	23810	Caudoputamen	caudate nucleus	0.743837365013245
LatentSpace_167	23826	Caudoputamen	caudate nucleus	0.7118410531026
LatentSpace_167	23828	Caudoputamen	caudate nucleus	0.904673623821893
LatentSpace_167	23829	Caudoputamen	caudate nucleus	0.936221785216615
LatentSpace_167	23830	Caudoputamen	caudate nucleus	0.954060415477696
LatentSpace_167	23831	Caudoputamen	caudate nucleus	0.963976663491608
LatentSpace_167	23832	Caudoputamen	caudate nucleus	0.965320618755769
LatentSpace_167	23833	Caudoputamen	nucleus accumbens	0.930029545352695
LatentSpace_167	23840	Caudoputamen	nucleus accumbens	0.927839012602672
LatentSpace_167	23841	Caudoputamen	caudate nucleus	0.963839524206943
LatentSpace_167	23842	Caudoputamen	caudate nucleus	0.963086201677776
LatentSpace_167	23843	Caudoputamen	caudate nucleus	0.959339168664975
LatentSpace_167	23844	Caudoputamen	caudate nucleus	0.952122951943524
LatentSpace_167	23845	Caudoputamen	caudate nucleus	0.929314062674358
LatentSpace_167	23846	Caudoputamen	caudate nucleus	0.856784746750732
LatentSpace_167	23847	Caudoputamen	dentate gyrus	0.730524783558864
LatentSpace_167	23865	Caudoputamen	caudate nucleus	0.817066924591816
LatentSpace_167	23866	Caudoputamen	caudate nucleus	0.868238390031361
LatentSpace_167	23867	Caudoputamen	caudate nucleus	0.896500197358045
LatentSpace_167	23868	Caudoputamen	caudate nucleus	0.904018215358668
LatentSpace_167	23869	Caudoputamen	nucleus accumbens	0.865467238882141
LatentSpace_167	23876	Caudoputamen	nucleus accumbens	0.857274637551292
LatentSpace_167	23877	Caudoputamen	caudate nucleus	0.902023163567516
LatentSpace_167	23878	Caudoputamen	caudate nucleus	0.904075124153086
LatentSpace_167	23879	Caudoputamen	caudate nucleus	0.887885441609734
LatentSpace_167	23880	Caudoputamen	caudate nucleus	0.850601170436366
LatentSpace_167	23881	Caudoputamen	dentate gyrus	0.768663668953319
LatentSpace_167	25059	Caudoputamen	CA4 field	0.860946788580453
LatentSpace_167	25070	Caudoputamen	caudate nucleus	0.92833729080113
LatentSpace_167	25096	Caudoputamen	caudate nucleus	0.926727187465953
LatentSpace_167	25109	Caudoputamen	caudate nucleus	0.931196593989635
LatentSpace_167	25110	Caudoputamen	caudate nucleus	0.935086364353339
LatentSpace_167	25138	Caudoputamen	caudate nucleus	0.935136382627704
LatentSpace_167	25139	Caudoputamen	caudate nucleus	0.917993072906353
LatentSpace_167	25151	Caudoputamen	caudate nucleus	0.885626594622213
LatentSpace_167	25152	Caudoputamen	caudate nucleus	0.933671480077097
LatentSpace_167	25153	Caudoputamen	putamen	0.928505967230695
LatentSpace_167	25182	Caudoputamen	caudate nucleus	0.934071321107047
LatentSpace_167	25183	Caudoputamen	caudate nucleus	0.93042763087884
LatentSpace_167	25184	Caudoputamen	caudate nucleus	0.853072371260335
LatentSpace_167	25195	Caudoputamen	planum polare	0.6711066082173
LatentSpace_167	25196	Caudoputamen	caudate nucleus	0.778330816677709
LatentSpace_167	25197	Caudoputamen	caudate nucleus	0.901172280323086
LatentSpace_167	25198	Caudoputamen	caudate nucleus	0.93589597276331
LatentSpace_167	25199	Caudoputamen	putamen	0.931425511334298
LatentSpace_167	25226	Caudoputamen	caudate nucleus	0.934727271247743
LatentSpace_167	25227	Caudoputamen	caudate nucleus	0.902349638403527
LatentSpace_167	25228	Caudoputamen	caudate nucleus	0.760689201246751
LatentSpace_167	25240	Caudoputamen	caudate nucleus	0.651427768622964
LatentSpace_167	25241	Caudoputamen	caudate nucleus	0.837102608564342
LatentSpace_167	25242	Caudoputamen	caudate nucleus	0.904238975468765
LatentSpace_167	25243	Caudoputamen	caudate nucleus	0.925543453897987
LatentSpace_167	25244	Caudoputamen	putamen	0.930735028105937
LatentSpace_167	25270	Caudoputamen	caudate nucleus	0.931093879626752
LatentSpace_167	25271	Caudoputamen	caudate nucleus	0.919535102433558
LatentSpace_167	25272	Caudoputamen	caudate nucleus	0.877521226139727
LatentSpace_167	25273	Caudoputamen	caudate nucleus	0.730598020719469
LatentSpace_167	25286	Caudoputamen	caudate nucleus	0.639280860744731
LatentSpace_167	25287	Caudoputamen	caudate nucleus	0.832334261910185
LatentSpace_167	25288	Caudoputamen	caudate nucleus	0.896260516971279
LatentSpace_167	25289	Caudoputamen	caudate nucleus	0.910401137602831
LatentSpace_167	25290	Caudoputamen	putamen	0.914790852115263
LatentSpace_167	25316	Caudoputamen	putamen	0.923015917357792
LatentSpace_167	25317	Caudoputamen	caudate nucleus	0.918890300311712
LatentSpace_167	25318	Caudoputamen	caudate nucleus	0.903727158410532
LatentSpace_167	25319	Caudoputamen	caudate nucleus	0.851506580318357
LatentSpace_167	25320	Caudoputamen	caudate nucleus	0.701193626330071
LatentSpace_167	25332	Caudoputamen	caudate nucleus	0.823350600297228
LatentSpace_167	25333	Caudoputamen	caudate nucleus	0.893502175304924
LatentSpace_167	25334	Caudoputamen	caudate nucleus	0.910574930535529
LatentSpace_167	25335	Caudoputamen	caudate nucleus	0.911746700382848
LatentSpace_167	25336	Caudoputamen	putamen	0.913303601687807
LatentSpace_167	25359	Caudoputamen	putamen	0.925166027973348
LatentSpace_167	25360	Caudoputamen	caudate nucleus	0.925227473100895
LatentSpace_167	25361	Caudoputamen	caudate nucleus	0.919650779951426
LatentSpace_167	25362	Caudoputamen	caudate nucleus	0.900102693551779
LatentSpace_167	25363	Caudoputamen	caudate nucleus	0.835027181936404
LatentSpace_167	25364	Caudoputamen	caudate nucleus	0.650598793017126
LatentSpace_167	25377	Caudoputamen	caudate nucleus	0.796248999336428
LatentSpace_167	25378	Caudoputamen	caudate nucleus	0.884879611241304
LatentSpace_167	25379	Caudoputamen	caudate nucleus	0.90803038195509
LatentSpace_167	25380	Caudoputamen	caudate nucleus	0.915857321452792
LatentSpace_167	25381	Caudoputamen	caudate nucleus	0.924756461379878
LatentSpace_167	25382	Caudoputamen	putamen	0.930740495050654
LatentSpace_167	25399	Caudoputamen	putamen	0.93416261258048
LatentSpace_167	25400	Caudoputamen	caudate nucleus	0.927624362562569
LatentSpace_167	25401	Caudoputamen	caudate nucleus	0.918385730688244
LatentSpace_167	25402	Caudoputamen	caudate nucleus	0.906638303561773
LatentSpace_167	25403	Caudoputamen	caudate nucleus	0.883493918383287
LatentSpace_167	25404	Caudoputamen	caudate nucleus	0.792504315540819
LatentSpace_167	25405	Caudoputamen	Heschl's gyrus	0.636723102917889
LatentSpace_167	25417	Caudoputamen	caudate nucleus	0.863826619353234
LatentSpace_167	25418	Caudoputamen	caudate nucleus	0.897848780999809
LatentSpace_167	25419	Caudoputamen	caudate nucleus	0.915033226483175
LatentSpace_167	25420	Caudoputamen	caudate nucleus	0.923638658896179
LatentSpace_167	25421	Caudoputamen	caudate nucleus	0.93096464869708
LatentSpace_167	25422	Caudoputamen	putamen	0.93621929036978
LatentSpace_167	25429	Caudoputamen	putamen	0.940936727941084
LatentSpace_167	25430	Caudoputamen	caudate nucleus	0.930576732347787
LatentSpace_167	25431	Caudoputamen	caudate nucleus	0.919100043554685
LatentSpace_167	25432	Caudoputamen	caudate nucleus	0.905072970641756
LatentSpace_167	25433	Caudoputamen	caudate nucleus	0.893640321883732
LatentSpace_167	25434	Caudoputamen	caudate nucleus	0.857539339695414
LatentSpace_167	25435	Caudoputamen	caudate nucleus	0.713957284474965
LatentSpace_167	25448	Caudoputamen	caudate nucleus	0.82484482092631
LatentSpace_167	25449	Caudoputamen	caudate nucleus	0.875705134364088
LatentSpace_167	25450	Caudoputamen	caudate nucleus	0.899343146391873
LatentSpace_167	25451	Caudoputamen	caudate nucleus	0.914752317895841
LatentSpace_167	25452	Caudoputamen	caudate nucleus	0.920808377518789
LatentSpace_167	25453	Caudoputamen	caudate nucleus	0.925996151150662
LatentSpace_167	25454	Caudoputamen	caudate nucleus	0.935316646028232
LatentSpace_167	25455	Caudoputamen	putamen	0.941255096956483
LatentSpace_167	25456	Caudoputamen	caudate nucleus	0.939717861846993
LatentSpace_167	25457	Caudoputamen	caudate nucleus	0.932176993917982
LatentSpace_167	25458	Caudoputamen	caudate nucleus	0.926220840292554
LatentSpace_167	25459	Caudoputamen	caudate nucleus	0.914776828952603
LatentSpace_167	25460	Caudoputamen	caudate nucleus	0.903029857749194
LatentSpace_167	25461	Caudoputamen	caudate nucleus	0.891002324453969
LatentSpace_167	25462	Caudoputamen	caudate nucleus	0.824410418327745
LatentSpace_167	25463	Caudoputamen	dentate gyrus	0.61504098680473
LatentSpace_167	25477	Caudoputamen	caudate nucleus	0.738926189768941
LatentSpace_167	25478	Caudoputamen	caudate nucleus	0.825737091418526
LatentSpace_167	25479	Caudoputamen	caudate nucleus	0.867933178383553
LatentSpace_167	25480	Caudoputamen	caudate nucleus	0.887526859096401
LatentSpace_167	25481	Caudoputamen	caudate nucleus	0.904439842190552
LatentSpace_167	25482	Caudoputamen	caudate nucleus	0.912387460614001
LatentSpace_167	25483	Caudoputamen	caudate nucleus	0.92162653110726
LatentSpace_167	25484	Caudoputamen	caudate nucleus	0.935119022673947
LatentSpace_167	25485	Caudoputamen	caudate nucleus	0.93977939873619
LatentSpace_167	25487	Caudoputamen	caudate nucleus	0.951065288460247
LatentSpace_167	25488	Caudoputamen	caudate nucleus	0.941966266112498
LatentSpace_167	25489	Caudoputamen	caudate nucleus	0.932547201424659
LatentSpace_167	25490	Caudoputamen	caudate nucleus	0.925949970282484
LatentSpace_167	25491	Caudoputamen	caudate nucleus	0.922484935481527
LatentSpace_167	25492	Caudoputamen	caudate nucleus	0.912002951061623
LatentSpace_167	25493	Caudoputamen	caudate nucleus	0.899508833987276
LatentSpace_167	25494	Caudoputamen	caudate nucleus	0.875877220668468
LatentSpace_167	25495	Caudoputamen	caudate nucleus	0.757639850455776
LatentSpace_167	25509	Caudoputamen	caudate nucleus	0.793284373559634
LatentSpace_167	25510	Caudoputamen	caudate nucleus	0.854562797473288
LatentSpace_167	25511	Caudoputamen	caudate nucleus	0.877419594391247
LatentSpace_167	25512	Caudoputamen	caudate nucleus	0.89634970482686
LatentSpace_167	25513	Caudoputamen	caudate nucleus	0.908179938961383
LatentSpace_167	25514	Caudoputamen	caudate nucleus	0.924203709929759
LatentSpace_167	25515	Caudoputamen	caudate nucleus	0.936439332112759
LatentSpace_167	25516	Caudoputamen	caudate nucleus	0.94393197166261
LatentSpace_167	25517	Caudoputamen	caudate nucleus	0.955703885419119
LatentSpace_167	25518	Caudoputamen	caudate nucleus	0.966214730678569
LatentSpace_167	25519	Caudoputamen	nucleus accumbens	0.931783820299201
LatentSpace_167	25520	Lateral septal complex	septal nuclei	0.868380768157275
LatentSpace_167	25521	Lateral septal complex	septal nuclei	0.890311545538159
LatentSpace_167	25522	Lateral septal complex	septal nuclei	0.899276278528855
LatentSpace_167	25523	Lateral septal complex	septal nuclei	0.908134217071862
LatentSpace_167	25524	Lateral septal complex	septal nuclei	0.890904181759646
LatentSpace_167	25525	Lateral septal complex	septal nuclei	0.878615695701935
LatentSpace_167	25526	Lateral septal complex	nucleus accumbens	0.871330725848055
LatentSpace_167	25527	Caudoputamen	caudate nucleus	0.939401332562101
LatentSpace_167	25528	Caudoputamen	caudate nucleus	0.966036448249538
LatentSpace_167	25529	Caudoputamen	caudate nucleus	0.961539749586948
LatentSpace_167	25530	Caudoputamen	caudate nucleus	0.952376275395515
LatentSpace_167	25531	Caudoputamen	caudate nucleus	0.939305758500152
LatentSpace_167	25532	Caudoputamen	caudate nucleus	0.926687004778413
LatentSpace_167	25533	Caudoputamen	caudate nucleus	0.91987063805426
LatentSpace_167	25534	Caudoputamen	caudate nucleus	0.918708426496068
LatentSpace_167	25535	Caudoputamen	caudate nucleus	0.905650119875589
LatentSpace_167	25536	Caudoputamen	caudate nucleus	0.889795783662671
LatentSpace_167	25537	Caudoputamen	caudate nucleus	0.837355573454895
LatentSpace_167	25538	Caudoputamen	caudate nucleus	0.650352778676894
LatentSpace_167	25552	Caudoputamen	caudate nucleus	0.742258372476137
LatentSpace_167	25553	Caudoputamen	caudate nucleus	0.850015444158338
LatentSpace_167	25554	Caudoputamen	caudate nucleus	0.873749951574074
LatentSpace_167	25555	Caudoputamen	caudate nucleus	0.894729809794758
LatentSpace_167	25556	Caudoputamen	caudate nucleus	0.909503891799613
LatentSpace_167	25557	Caudoputamen	caudate nucleus	0.921368115292373
LatentSpace_167	25558	Caudoputamen	caudate nucleus	0.927479197170999
LatentSpace_167	25559	Caudoputamen	caudate nucleus	0.933074463950734
LatentSpace_167	25560	Caudoputamen	caudate nucleus	0.943424154767966
LatentSpace_167	25561	Caudoputamen	caudate nucleus	0.96255544976556
LatentSpace_167	25562	Caudoputamen	caudate nucleus	0.956561680838552
LatentSpace_167	25563	Lateral septal complex	septal nuclei	0.870166506850511
LatentSpace_167	25564	Lateral septal complex	septal nuclei	0.875323342430251
LatentSpace_167	25565	Lateral septal complex	septal nuclei	0.885018452545562
LatentSpace_167	25566	Lateral septal complex	septal nuclei	0.899928905247279
LatentSpace_167	25567	Lateral septal complex	septal nuclei	0.889012619524968
LatentSpace_167	25568	Lateral septal complex	septal nuclei	0.872373697010337
LatentSpace_167	25569	Caudoputamen	caudate nucleus	0.953797129482042
LatentSpace_167	25570	Caudoputamen	caudate nucleus	0.962777603507784
LatentSpace_167	25571	Caudoputamen	caudate nucleus	0.956401720364836
LatentSpace_167	25572	Caudoputamen	caudate nucleus	0.944924259971446
LatentSpace_167	25573	Caudoputamen	caudate nucleus	0.933394091479845
LatentSpace_167	25574	Caudoputamen	caudate nucleus	0.92317741309575
LatentSpace_167	25575	Caudoputamen	caudate nucleus	0.913509701362729
LatentSpace_167	25576	Caudoputamen	caudate nucleus	0.912938664752038
LatentSpace_167	25577	Caudoputamen	caudate nucleus	0.897790948424033
LatentSpace_167	25578	Caudoputamen	caudate nucleus	0.867585890676625
LatentSpace_167	25579	Caudoputamen	caudate nucleus	0.752569934311918
LatentSpace_167	25592	Caudoputamen	Heschl's gyrus	0.622070831919214
LatentSpace_167	25593	Caudoputamen	caudate nucleus	0.817451730053889
LatentSpace_167	25594	Caudoputamen	caudate nucleus	0.879586807841341
LatentSpace_167	25595	Caudoputamen	caudate nucleus	0.900864048120195
LatentSpace_167	25596	Caudoputamen	caudate nucleus	0.912363133584216
LatentSpace_167	25597	Caudoputamen	caudate nucleus	0.921452761480356
LatentSpace_167	25598	Caudoputamen	caudate nucleus	0.929398220669591
LatentSpace_167	25599	Caudoputamen	caudate nucleus	0.93172946652428
LatentSpace_167	25600	Caudoputamen	caudate nucleus	0.943278586276839
LatentSpace_167	25601	Caudoputamen	caudate nucleus	0.961874034984006
LatentSpace_167	25602	Caudoputamen	caudate nucleus	0.968660637247357
LatentSpace_167	25603	Lateral septal complex	septal nuclei	0.868652061132537
LatentSpace_167	25604	Lateral septal complex	septal nuclei	0.885233250033724
LatentSpace_167	25605	Lateral septal complex	septal nuclei	0.89398513162011
LatentSpace_167	25608	Lateral septal complex	septal nuclei	0.909734287332292
LatentSpace_167	25609	Lateral septal complex	septal nuclei	0.898474687807056
LatentSpace_167	25610	Lateral septal complex	septal nuclei	0.878400364526418
LatentSpace_167	25611	Caudoputamen	nucleus accumbens	0.930148091040548
LatentSpace_167	25612	Caudoputamen	caudate nucleus	0.967313346163368
LatentSpace_167	25613	Caudoputamen	caudate nucleus	0.96466261520931
LatentSpace_167	25614	Caudoputamen	caudate nucleus	0.956038179942926
LatentSpace_167	25615	Caudoputamen	caudate nucleus	0.947942208057913
LatentSpace_167	25616	Caudoputamen	caudate nucleus	0.933640678290345
LatentSpace_167	25617	Caudoputamen	caudate nucleus	0.928708870163378
LatentSpace_167	25618	Caudoputamen	caudate nucleus	0.920978485920888
LatentSpace_167	25619	Caudoputamen	caudate nucleus	0.911071576846418
LatentSpace_167	25620	Caudoputamen	caudate nucleus	0.895356630261131
LatentSpace_167	25621	Caudoputamen	caudate nucleus	0.839124056540644
LatentSpace_167	25634	Caudoputamen	caudate nucleus	0.736690324753193
LatentSpace_167	25635	Caudoputamen	caudate nucleus	0.872606228091262
LatentSpace_167	25636	Caudoputamen	caudate nucleus	0.912122520549854
LatentSpace_167	25637	Caudoputamen	caudate nucleus	0.922238340166456
LatentSpace_167	25638	Caudoputamen	caudate nucleus	0.930161286466376
LatentSpace_167	25639	Caudoputamen	caudate nucleus	0.937645856164464
LatentSpace_167	25640	Caudoputamen	caudate nucleus	0.945424159584977
LatentSpace_167	25641	Caudoputamen	caudate nucleus	0.955027817529018
LatentSpace_167	25642	Caudoputamen	caudate nucleus	0.968265089746871
LatentSpace_167	25643	Caudoputamen	caudate nucleus	0.976762048760945
LatentSpace_167	25644	Caudoputamen	nucleus accumbens	0.949602275823362
LatentSpace_167	25645	Lateral septal complex	nucleus accumbens	0.876109140626857
LatentSpace_167	25646	Lateral septal complex	septal nuclei	0.891362491430612
LatentSpace_167	25647	Lateral septal complex	septal nuclei	0.900458595878238
LatentSpace_167	25648	Lateral septal complex	septal nuclei	0.905291656569447
LatentSpace_167	25649	Lateral septal complex	septal nuclei	0.903464506818307
LatentSpace_167	25650	Lateral septal complex	septal nuclei	0.898710949786555
LatentSpace_167	25651	Lateral septal complex	septal nuclei	0.894758532036598
LatentSpace_167	25652	Caudoputamen	nucleus accumbens	0.955822829751396
LatentSpace_167	25653	Caudoputamen	caudate nucleus	0.97557328694309
LatentSpace_167	25654	Caudoputamen	caudate nucleus	0.968913779690178
LatentSpace_167	25655	Caudoputamen	caudate nucleus	0.960303344173699
LatentSpace_167	25656	Caudoputamen	caudate nucleus	0.951483348981267
LatentSpace_167	25657	Caudoputamen	caudate nucleus	0.944735074749329
LatentSpace_167	25658	Caudoputamen	caudate nucleus	0.944968650017041
LatentSpace_167	25659	Caudoputamen	caudate nucleus	0.939394390423084
LatentSpace_167	25660	Caudoputamen	caudate nucleus	0.925229815772466
LatentSpace_167	25661	Caudoputamen	caudate nucleus	0.870723984929989
LatentSpace_167	25662	Caudoputamen	caudate nucleus	0.723529648137558
LatentSpace_167	25675	Caudoputamen	caudate nucleus	0.796837847345615
LatentSpace_167	25676	Caudoputamen	caudate nucleus	0.905045157522515
LatentSpace_167	25677	Caudoputamen	caudate nucleus	0.930435125718852
LatentSpace_167	25678	Caudoputamen	caudate nucleus	0.942927444210317
LatentSpace_167	25679	Caudoputamen	caudate nucleus	0.950825157934323
LatentSpace_167	25680	Caudoputamen	caudate nucleus	0.96030682267394
LatentSpace_167	25681	Caudoputamen	caudate nucleus	0.96825959934949
LatentSpace_167	25682	Caudoputamen	caudate nucleus	0.977507900113456
LatentSpace_167	25683	Caudoputamen	caudate nucleus	0.979823272733303
LatentSpace_167	25684	Caudoputamen	nucleus accumbens	0.960063646128071
LatentSpace_167	25685	Lateral septal complex	septal nuclei	0.879306428155911
LatentSpace_167	25686	Lateral septal complex	septal nuclei	0.880017297897988
LatentSpace_167	25687	Lateral septal complex	septal nuclei	0.875853434039297
LatentSpace_167	25688	Lateral septal complex	septal nuclei	0.871247625972251
LatentSpace_167	25689	Lateral septal complex	amygdala	0.877826940387874
LatentSpace_167	25690	Lateral septal complex	septal nuclei	0.870225568796385
LatentSpace_167	25691	Caudoputamen	nucleus accumbens	0.960412710043317
LatentSpace_167	25692	Caudoputamen	caudate nucleus	0.976990265357623
LatentSpace_167	25693	Caudoputamen	caudate nucleus	0.973082871038343
LatentSpace_167	25694	Caudoputamen	caudate nucleus	0.966254712740921
LatentSpace_167	25695	Caudoputamen	caudate nucleus	0.959633795982932
LatentSpace_167	25696	Caudoputamen	caudate nucleus	0.953805027083403
LatentSpace_167	25697	Caudoputamen	caudate nucleus	0.949693614378138
LatentSpace_167	25698	Caudoputamen	caudate nucleus	0.936210683634865
LatentSpace_167	25699	Caudoputamen	caudate nucleus	0.894809199864873
LatentSpace_167	25700	Caudoputamen	caudate nucleus	0.738677960623623
LatentSpace_167	25715	Caudoputamen	caudate nucleus	0.752923104980464
LatentSpace_167	25716	Caudoputamen	caudate nucleus	0.869455290218578
LatentSpace_167	25717	Caudoputamen	caudate nucleus	0.923283817668549
LatentSpace_167	25718	Caudoputamen	caudate nucleus	0.94749332358423
LatentSpace_167	25719	Caudoputamen	caudate nucleus	0.961221753450244
LatentSpace_167	25720	Caudoputamen	caudate nucleus	0.969021871076426
LatentSpace_167	25721	Caudoputamen	caudate nucleus	0.978188836364147
LatentSpace_167	25722	Caudoputamen	caudate nucleus	0.978620953464166
LatentSpace_167	25723	Caudoputamen	caudate nucleus	0.952682036467667
LatentSpace_167	25724	Lateral septal complex	amygdala	0.879755027419718
LatentSpace_167	25725	Lateral septal complex	amygdala	0.885169681703829
LatentSpace_167	25726	Lateral septal complex	amygdala	0.872667465119739
LatentSpace_167	25727	Lateral septal complex	amygdala	0.866203068738271
LatentSpace_167	25728	Lateral septal complex	paraterminal gyrus	0.878485626801808
LatentSpace_167	25729	Lateral septal complex	paraterminal gyrus	0.872543087860173
LatentSpace_167	25730	Caudoputamen	caudate nucleus	0.951332211667446
LatentSpace_167	25731	Caudoputamen	caudate nucleus	0.976373310734692
LatentSpace_167	25732	Caudoputamen	caudate nucleus	0.970990951279467
LatentSpace_167	25733	Caudoputamen	caudate nucleus	0.962896811136054
LatentSpace_167	25734	Caudoputamen	caudate nucleus	0.959177538729817
LatentSpace_167	25735	Caudoputamen	caudate nucleus	0.948529997323779
LatentSpace_167	25736	Caudoputamen	caudate nucleus	0.931675800934269
LatentSpace_167	25737	Caudoputamen	caudate nucleus	0.881508208272578
LatentSpace_167	25753	Caudoputamen	Heschl's gyrus	0.715408146073544
LatentSpace_167	25754	Caudoputamen	caudate nucleus	0.802823007123914
LatentSpace_167	25755	Caudoputamen	caudate nucleus	0.888675667128992
LatentSpace_167	25756	Caudoputamen	caudate nucleus	0.934159924032427
LatentSpace_167	25757	Caudoputamen	caudate nucleus	0.951256134232204
LatentSpace_167	25758	Caudoputamen	caudate nucleus	0.961900150556586
LatentSpace_167	25759	Caudoputamen	caudate nucleus	0.959328097908465
LatentSpace_167	25760	Caudoputamen	caudate nucleus	0.916375211004732
LatentSpace_167	25767	Caudoputamen	nucleus accumbens	0.913068317550454
LatentSpace_167	25768	Caudoputamen	caudate nucleus	0.95896512256917
LatentSpace_167	25769	Caudoputamen	caudate nucleus	0.959479118592926
LatentSpace_167	25770	Caudoputamen	caudate nucleus	0.949994240781863
LatentSpace_167	25771	Caudoputamen	caudate nucleus	0.939072520246387
LatentSpace_167	25772	Caudoputamen	caudate nucleus	0.921097426288566
LatentSpace_167	25773	Caudoputamen	caudate nucleus	0.85816218018405
LatentSpace_167	25791	Caudoputamen	caudate nucleus	0.88607645685807
LatentSpace_167	25792	Caudoputamen	caudate nucleus	0.811731913203787
LatentSpace_167	27062	Caudoputamen	caudate nucleus	0.914353591681995
LatentSpace_167	27085	Caudoputamen	caudate nucleus	0.918010080851591
LatentSpace_167	27097	Caudoputamen	caudate nucleus	0.9164346063093
LatentSpace_167	27098	Caudoputamen	putamen	0.925126944669769
LatentSpace_167	27125	Caudoputamen	caudate nucleus	0.933366944315737
LatentSpace_167	27126	Caudoputamen	caudate nucleus	0.908511481896583
LatentSpace_167	27138	Caudoputamen	caudate nucleus	0.853387183296448
LatentSpace_167	27139	Caudoputamen	caudate nucleus	0.928408531805335
LatentSpace_167	27166	Caudoputamen	caudate nucleus	0.941192435226656
LatentSpace_167	27167	Caudoputamen	caudate nucleus	0.933719131882014
LatentSpace_167	27168	Caudoputamen	caudate nucleus	0.825721698215089
LatentSpace_167	27180	Caudoputamen	caudate nucleus	0.687934782369448
LatentSpace_167	27181	Caudoputamen	caudate nucleus	0.884208467789935
LatentSpace_167	27182	Caudoputamen	caudate nucleus	0.930585623417034
LatentSpace_167	27209	Caudoputamen	caudate nucleus	0.937481957086806
LatentSpace_167	27210	Caudoputamen	caudate nucleus	0.894447121088694
LatentSpace_167	27211	Caudoputamen	caudate nucleus	0.679486356892928
LatentSpace_167	27223	Caudoputamen	caudate nucleus	0.795213671081065
LatentSpace_167	27224	Caudoputamen	caudate nucleus	0.900384769427944
LatentSpace_167	27225	Caudoputamen	caudate nucleus	0.924627197368405
LatentSpace_167	27251	Caudoputamen	caudate nucleus	0.932969306997866
LatentSpace_167	27252	Caudoputamen	caudate nucleus	0.915801245804836
LatentSpace_167	27253	Caudoputamen	caudate nucleus	0.849873020139062
LatentSpace_167	27254	Caudoputamen	caudate nucleus	0.621062167610445
LatentSpace_167	27267	Caudoputamen	caudate nucleus	0.790257134079815
LatentSpace_167	27268	Caudoputamen	caudate nucleus	0.888249606388556
LatentSpace_167	27269	Caudoputamen	caudate nucleus	0.907264705713418
LatentSpace_167	27270	Caudoputamen	caudate nucleus	0.913739367521244
LatentSpace_167	27293	Caudoputamen	caudate nucleus	0.923233733094728
LatentSpace_167	27294	Caudoputamen	caudate nucleus	0.913303612373067
LatentSpace_167	27295	Caudoputamen	caudate nucleus	0.889229660723451
LatentSpace_167	27296	Caudoputamen	caudate nucleus	0.807312042758364
LatentSpace_167	27297	Caudoputamen	occipital pole	0.633098107644032
LatentSpace_167	27310	Caudoputamen	caudate nucleus	0.758675220970255
LatentSpace_167	27311	Caudoputamen	caudate nucleus	0.877135541560972
LatentSpace_167	27312	Caudoputamen	caudate nucleus	0.906044888798183
LatentSpace_167	27313	Caudoputamen	caudate nucleus	0.911006149162771
LatentSpace_167	27314	Caudoputamen	caudate nucleus	0.912910992252136
LatentSpace_167	27332	Caudoputamen	caudate nucleus	0.93254329566428
LatentSpace_167	27333	Caudoputamen	caudate nucleus	0.923796006987643
LatentSpace_167	27334	Caudoputamen	caudate nucleus	0.911843108135576
LatentSpace_167	27335	Caudoputamen	caudate nucleus	0.887675914310939
LatentSpace_167	27336	Caudoputamen	caudate nucleus	0.781567484882882
LatentSpace_167	27348	Caudoputamen	caudate nucleus	0.7235756318809
LatentSpace_167	27349	Caudoputamen	caudate nucleus	0.871376920671649
LatentSpace_167	27350	Caudoputamen	caudate nucleus	0.906008100687598
LatentSpace_167	27351	Caudoputamen	caudate nucleus	0.915111694333803
LatentSpace_167	27352	Caudoputamen	caudate nucleus	0.919860636713731
LatentSpace_167	27353	Caudoputamen	caudate nucleus	0.923560517518707
LatentSpace_167	27354	Caudoputamen	putamen	0.933513057341352
LatentSpace_167	27365	Caudoputamen	caudate nucleus	0.942383991374577
LatentSpace_167	27366	Caudoputamen	caudate nucleus	0.934007107167255
LatentSpace_167	27367	Caudoputamen	caudate nucleus	0.919079348341112
LatentSpace_167	27368	Caudoputamen	caudate nucleus	0.903624020475058
LatentSpace_167	27369	Caudoputamen	caudate nucleus	0.870683677197595
LatentSpace_167	27370	Caudoputamen	caudate nucleus	0.722032536948791
LatentSpace_167	27382	Caudoputamen	caudate nucleus	0.842287425333186
LatentSpace_167	27383	Caudoputamen	caudate nucleus	0.894233462022564
LatentSpace_167	27384	Caudoputamen	caudate nucleus	0.90954885416418
LatentSpace_167	27385	Caudoputamen	caudate nucleus	0.916991894610118
LatentSpace_167	27386	Caudoputamen	caudate nucleus	0.922212386502888
LatentSpace_167	27387	Caudoputamen	caudate nucleus	0.931490165815146
LatentSpace_167	27388	Caudoputamen	putamen	0.939746990882819
LatentSpace_167	27389	Caudoputamen	caudate nucleus	0.940567149521057
LatentSpace_167	27390	Caudoputamen	caudate nucleus	0.934108255610262
LatentSpace_167	27391	Caudoputamen	caudate nucleus	0.922882474015499
LatentSpace_167	27392	Caudoputamen	caudate nucleus	0.905778488315683
LatentSpace_167	27393	Caudoputamen	caudate nucleus	0.887133049862615
LatentSpace_167	27394	Caudoputamen	caudate nucleus	0.822272814903932
LatentSpace_167	27395	Caudoputamen	occipital pole	0.63810982676547
LatentSpace_167	27409	Caudoputamen	caudate nucleus	0.787788659419715
LatentSpace_167	27410	Caudoputamen	caudate nucleus	0.868968153544541
LatentSpace_167	27411	Caudoputamen	caudate nucleus	0.896552549187925
LatentSpace_167	27412	Caudoputamen	caudate nucleus	0.906067312312726
LatentSpace_167	27413	Caudoputamen	caudate nucleus	0.915037408727979
LatentSpace_167	27414	Caudoputamen	caudate nucleus	0.924164852731676
LatentSpace_167	27415	Caudoputamen	caudate nucleus	0.931517815780385
LatentSpace_167	27416	Caudoputamen	caudate nucleus	0.939072191454922
LatentSpace_167	27417	Caudoputamen	caudate nucleus	0.942970654991516
LatentSpace_167	27418	Caudoputamen	caudate nucleus	0.940557118536588
LatentSpace_167	27419	Caudoputamen	caudate nucleus	0.935030582527883
LatentSpace_167	27420	Caudoputamen	caudate nucleus	0.925410655035413
LatentSpace_167	27421	Caudoputamen	caudate nucleus	0.913932881413333
LatentSpace_167	27422	Caudoputamen	caudate nucleus	0.903252915686991
LatentSpace_167	27423	Caudoputamen	caudate nucleus	0.879900683477657
LatentSpace_167	27424	Caudoputamen	caudate nucleus	0.762133670149171
LatentSpace_167	27438	Caudoputamen	caudate nucleus	0.686126823034637
LatentSpace_167	27439	Caudoputamen	caudate nucleus	0.820329623914552
LatentSpace_167	27440	Caudoputamen	caudate nucleus	0.867979628301994
LatentSpace_167	27441	Caudoputamen	caudate nucleus	0.886005615013347
LatentSpace_167	27442	Caudoputamen	caudate nucleus	0.89975417145719
LatentSpace_167	27443	Caudoputamen	caudate nucleus	0.909178841310686
LatentSpace_167	27444	Caudoputamen	caudate nucleus	0.921872367493037
LatentSpace_167	27445	Caudoputamen	caudate nucleus	0.933358467111265
LatentSpace_167	27446	Caudoputamen	caudate nucleus	0.937755127928625
LatentSpace_167	27447	Caudoputamen	caudate nucleus	0.952988285279361
LatentSpace_167	27448	Caudoputamen	caudate nucleus	0.95237644229552
LatentSpace_167	27449	Caudoputamen	putamen	0.890193884369812
LatentSpace_167	27450	Lateral septal complex	septal nuclei	0.866466082323785
LatentSpace_167	27451	Lateral septal complex	septal nuclei	0.848482649717777
LatentSpace_167	27452	Caudoputamen	putamen	0.904847712980545
LatentSpace_167	27453	Caudoputamen	putamen	0.954504029142487
LatentSpace_167	27454	Caudoputamen	caudate nucleus	0.955011173908448
LatentSpace_167	27455	Caudoputamen	caudate nucleus	0.946904660495383
LatentSpace_167	27456	Caudoputamen	caudate nucleus	0.940830060272515
LatentSpace_167	27457	Caudoputamen	caudate nucleus	0.935565179332439
LatentSpace_167	27458	Caudoputamen	caudate nucleus	0.929255345076738
LatentSpace_167	27459	Caudoputamen	caudate nucleus	0.925481665004282
LatentSpace_167	27460	Caudoputamen	caudate nucleus	0.910803437256351
LatentSpace_167	27461	Caudoputamen	caudate nucleus	0.896965261584381
LatentSpace_167	27462	Caudoputamen	caudate nucleus	0.846750197877229
LatentSpace_167	27463	Caudoputamen	caudate nucleus	0.6517533126021
LatentSpace_167	27477	Caudoputamen	caudate nucleus	0.767478559816453
LatentSpace_167	27478	Caudoputamen	caudate nucleus	0.856686247949547
LatentSpace_167	27479	Caudoputamen	caudate nucleus	0.88346031245895
LatentSpace_167	27480	Caudoputamen	caudate nucleus	0.896283506106084
LatentSpace_167	27481	Caudoputamen	caudate nucleus	0.911903764000306
LatentSpace_167	27482	Caudoputamen	caudate nucleus	0.92526310627376
LatentSpace_167	27483	Caudoputamen	caudate nucleus	0.939129590570466
LatentSpace_167	27484	Caudoputamen	caudate nucleus	0.945746547837716
LatentSpace_167	27485	Caudoputamen	caudate nucleus	0.952945226353587
LatentSpace_167	27486	Caudoputamen	caudate nucleus	0.966374950217734
LatentSpace_167	27487	Caudoputamen	caudate nucleus	0.936322909789994
LatentSpace_167	27488	Lateral septal complex	nucleus accumbens	0.861792724617719
LatentSpace_167	27489	Lateral septal complex	septal nuclei	0.865350903860553
LatentSpace_167	27490	Lateral septal complex	septal nuclei	0.872816182951595
LatentSpace_167	27491	Lateral septal complex	septal nuclei	0.880602497575521
LatentSpace_167	27492	Lateral septal complex	septal nuclei	0.886484922290202
LatentSpace_167	27493	Lateral septal complex	septal nuclei	0.875758989376977
LatentSpace_167	27494	Lateral septal complex	septal nuclei	0.863273838632146
LatentSpace_167	27495	Lateral septal complex	nucleus accumbens	0.866798940768689
LatentSpace_167	27496	Caudoputamen	caudate nucleus	0.942764610812585
LatentSpace_167	27497	Caudoputamen	caudate nucleus	0.964221618735306
LatentSpace_167	27498	Caudoputamen	caudate nucleus	0.958628321859435
LatentSpace_167	27499	Caudoputamen	caudate nucleus	0.951548927644996
LatentSpace_167	27500	Caudoputamen	caudate nucleus	0.940885198158932
LatentSpace_167	27501	Caudoputamen	caudate nucleus	0.92853655054368
LatentSpace_167	27502	Caudoputamen	caudate nucleus	0.925627231882035
LatentSpace_167	27503	Caudoputamen	caudate nucleus	0.92331333116153
LatentSpace_167	27504	Caudoputamen	caudate nucleus	0.913245179745469
LatentSpace_167	27505	Caudoputamen	caudate nucleus	0.885294541243479
LatentSpace_167	27506	Caudoputamen	caudate nucleus	0.789500939516723
LatentSpace_167	27521	Caudoputamen	caudate nucleus	0.702577546819206
LatentSpace_167	27522	Caudoputamen	caudate nucleus	0.843309516545715
LatentSpace_167	27523	Caudoputamen	caudate nucleus	0.880930941272597
LatentSpace_167	27524	Caudoputamen	caudate nucleus	0.901286892935012
LatentSpace_167	27525	Caudoputamen	caudate nucleus	0.918428190952052
LatentSpace_167	27526	Caudoputamen	caudate nucleus	0.927914931687292
LatentSpace_167	27527	Caudoputamen	caudate nucleus	0.933244623177445
LatentSpace_167	27528	Caudoputamen	caudate nucleus	0.940675639409837
LatentSpace_167	27529	Caudoputamen	caudate nucleus	0.948891991813013
LatentSpace_167	27530	Caudoputamen	caudate nucleus	0.964583009116759
LatentSpace_167	27531	Caudoputamen	caudate nucleus	0.962328102123695
LatentSpace_167	27532	Caudoputamen	nucleus accumbens	0.911839116155527
LatentSpace_167	27533	Lateral septal complex	septal nuclei	0.855261458752384
LatentSpace_167	27534	Lateral septal complex	septal nuclei	0.864659801312202
LatentSpace_167	27535	Lateral septal complex	septal nuclei	0.8760232118683
LatentSpace_167	27536	Lateral septal complex	septal nuclei	0.882753265177847
LatentSpace_167	27537	Lateral septal complex	septal nuclei	0.877085271454816
LatentSpace_167	27538	Lateral septal complex	septal nuclei	0.862602082241575
LatentSpace_167	27539	Caudoputamen	nucleus accumbens	0.898468257413384
LatentSpace_167	27540	Caudoputamen	caudate nucleus	0.956245836516379
LatentSpace_167	27541	Caudoputamen	caudate nucleus	0.962219094090039
LatentSpace_167	27542	Caudoputamen	caudate nucleus	0.956535465689819
LatentSpace_167	27543	Caudoputamen	caudate nucleus	0.94700074545387
LatentSpace_167	27544	Caudoputamen	caudate nucleus	0.933982588755813
LatentSpace_167	27545	Caudoputamen	caudate nucleus	0.924539145433951
LatentSpace_167	27546	Caudoputamen	caudate nucleus	0.92496746292541
LatentSpace_167	27547	Caudoputamen	caudate nucleus	0.922741899928065
LatentSpace_167	27548	Caudoputamen	caudate nucleus	0.89875294102876
LatentSpace_167	27549	Caudoputamen	caudate nucleus	0.846350935519596
LatentSpace_167	27550	Caudoputamen	caudate nucleus	0.667179032977683
LatentSpace_167	27565	Caudoputamen	caudate nucleus	0.787974303375196
LatentSpace_167	27566	Caudoputamen	caudate nucleus	0.864493416652301
LatentSpace_167	27567	Caudoputamen	caudate nucleus	0.894460556102672
LatentSpace_167	27568	Caudoputamen	caudate nucleus	0.911823772434861
LatentSpace_167	27569	Caudoputamen	caudate nucleus	0.921809400620423
LatentSpace_167	27570	Caudoputamen	caudate nucleus	0.927107691059626
LatentSpace_167	27571	Caudoputamen	caudate nucleus	0.932064447113292
LatentSpace_167	27572	Caudoputamen	caudate nucleus	0.944863636274441
LatentSpace_167	27573	Caudoputamen	caudate nucleus	0.960878403731993
LatentSpace_167	27574	Caudoputamen	caudate nucleus	0.970140588119546
LatentSpace_167	27575	Caudoputamen	nucleus accumbens	0.923265630592586
LatentSpace_167	27576	Lateral septal complex	nucleus accumbens	0.856030257154616
LatentSpace_167	27577	Lateral septal complex	septal nuclei	0.876739079788275
LatentSpace_167	27578	Lateral septal complex	septal nuclei	0.889156079691263
LatentSpace_167	27579	Lateral septal complex	septal nuclei	0.899028685098105
LatentSpace_167	27580	Lateral septal complex	septal nuclei	0.907372119171769
LatentSpace_167	27581	Lateral septal complex	septal nuclei	0.898535370547295
LatentSpace_167	27582	Lateral septal complex	septal nuclei	0.896503278184509
LatentSpace_167	27583	Lateral septal complex	septal nuclei	0.869413222119531
LatentSpace_167	27584	Caudoputamen	nucleus accumbens	0.929005850599553
LatentSpace_167	27585	Caudoputamen	caudate nucleus	0.969804346616328
LatentSpace_167	27586	Caudoputamen	caudate nucleus	0.966712485820217
LatentSpace_167	27587	Caudoputamen	caudate nucleus	0.957286065430977
LatentSpace_167	27588	Caudoputamen	caudate nucleus	0.949813434979815
LatentSpace_167	27589	Caudoputamen	caudate nucleus	0.936735353013238
LatentSpace_167	27590	Caudoputamen	caudate nucleus	0.930057575802418
LatentSpace_167	27591	Caudoputamen	caudate nucleus	0.922002581162106
LatentSpace_167	27592	Caudoputamen	caudate nucleus	0.911342623032377
LatentSpace_167	27593	Caudoputamen	caudate nucleus	0.88379815909143
LatentSpace_167	27594	Caudoputamen	caudate nucleus	0.783209179588177
LatentSpace_167	27608	Caudoputamen	caudate nucleus	0.686479791546625
LatentSpace_167	27609	Caudoputamen	caudate nucleus	0.839637290169413
LatentSpace_167	27610	Caudoputamen	caudate nucleus	0.89521298564645
LatentSpace_167	27611	Caudoputamen	caudate nucleus	0.917927399374704
LatentSpace_167	27612	Caudoputamen	caudate nucleus	0.926713566599972
LatentSpace_167	27613	Caudoputamen	caudate nucleus	0.934509116237794
LatentSpace_167	27614	Caudoputamen	caudate nucleus	0.944542191199008
LatentSpace_167	27615	Caudoputamen	caudate nucleus	0.957610746708862
LatentSpace_167	27616	Caudoputamen	caudate nucleus	0.968322878342282
LatentSpace_167	27617	Caudoputamen	caudate nucleus	0.977183711081284
LatentSpace_167	27618	Caudoputamen	caudate nucleus	0.950880640315727
LatentSpace_167	27619	Lateral septal complex	septal nuclei	0.8860141543761
LatentSpace_167	27620	Lateral septal complex	septal nuclei	0.894049200196475
LatentSpace_167	27621	Lateral septal complex	septal nuclei	0.895742297987169
LatentSpace_167	27622	Lateral septal complex	septal nuclei	0.896922193187027
LatentSpace_167	27623	Lateral septal complex	septal nuclei	0.894430894919
LatentSpace_167	27624	Lateral septal complex	septal nuclei	0.892183866918708
LatentSpace_167	27625	Caudoputamen	nucleus accumbens	0.956037045113945
LatentSpace_167	27626	Caudoputamen	caudate nucleus	0.9782039419947
LatentSpace_167	27627	Caudoputamen	caudate nucleus	0.973595152262652
LatentSpace_167	27628	Caudoputamen	caudate nucleus	0.96526879854134
LatentSpace_167	27629	Caudoputamen	caudate nucleus	0.959713893356477
LatentSpace_167	27630	Caudoputamen	caudate nucleus	0.955316474388875
LatentSpace_167	27631	Caudoputamen	caudate nucleus	0.951433647033448
LatentSpace_167	27632	Caudoputamen	caudate nucleus	0.942004359477989
LatentSpace_167	27633	Caudoputamen	caudate nucleus	0.917049127086419
LatentSpace_167	27634	Caudoputamen	caudate nucleus	0.843101666673405
LatentSpace_167	27648	Caudoputamen	caudate nucleus	0.734487978930513
LatentSpace_167	27649	Caudoputamen	caudate nucleus	0.888413716601095
LatentSpace_167	27650	Caudoputamen	caudate nucleus	0.930694068672065
LatentSpace_167	27651	Caudoputamen	caudate nucleus	0.94422015593745
LatentSpace_167	27652	Caudoputamen	caudate nucleus	0.953563957507166
LatentSpace_167	27653	Caudoputamen	caudate nucleus	0.961127886327656
LatentSpace_167	27654	Caudoputamen	caudate nucleus	0.970504656844192
LatentSpace_167	27655	Caudoputamen	caudate nucleus	0.978445343444556
LatentSpace_167	27656	Caudoputamen	caudate nucleus	0.980924879027587
LatentSpace_167	27657	Caudoputamen	caudate nucleus	0.960187897633636
LatentSpace_167	27658	Lateral septal complex	septal nuclei	0.865223623611307
LatentSpace_167	27659	Lateral septal complex	septal nuclei	0.868710257126268
LatentSpace_167	27660	Lateral septal complex	septal nuclei	0.865770992811626
LatentSpace_167	27661	Lateral septal complex	septal nuclei	0.864342179898807
LatentSpace_167	27662	Lateral septal complex	amygdala	0.869221212382289
LatentSpace_167	27663	Lateral septal complex	septal nuclei	0.864620632689245
LatentSpace_167	27664	Caudoputamen	nucleus accumbens	0.956207861874637
LatentSpace_167	27665	Caudoputamen	caudate nucleus	0.975609227979867
LatentSpace_167	27666	Caudoputamen	caudate nucleus	0.978645377751494
LatentSpace_167	27667	Caudoputamen	caudate nucleus	0.972602303174825
LatentSpace_167	27668	Caudoputamen	caudate nucleus	0.963697762475949
LatentSpace_167	27669	Caudoputamen	caudate nucleus	0.960522808272499
LatentSpace_167	27670	Caudoputamen	caudate nucleus	0.95521591399794
LatentSpace_167	27671	Caudoputamen	caudate nucleus	0.933284754354538
LatentSpace_167	27672	Caudoputamen	caudate nucleus	0.871442627123623
LatentSpace_167	27687	Caudoputamen	caudate nucleus	0.708667648425374
LatentSpace_167	27688	Caudoputamen	caudate nucleus	0.855808705324575
LatentSpace_167	27689	Caudoputamen	caudate nucleus	0.91949727360023
LatentSpace_167	27690	Caudoputamen	caudate nucleus	0.945635196977813
LatentSpace_167	27691	Caudoputamen	caudate nucleus	0.958702459882633
LatentSpace_167	27692	Caudoputamen	caudate nucleus	0.970101454242819
LatentSpace_167	27693	Caudoputamen	caudate nucleus	0.977701618846373
LatentSpace_167	27694	Caudoputamen	caudate nucleus	0.975274864721214
LatentSpace_167	27695	Caudoputamen	caudate nucleus	0.949880165631531
LatentSpace_167	27696	Lateral septal complex	paraterminal gyrus	0.864157097750525
LatentSpace_167	27697	Caudoputamen	caudate nucleus	0.94953130345395
LatentSpace_167	27698	Caudoputamen	caudate nucleus	0.971626836928022
LatentSpace_167	27699	Caudoputamen	caudate nucleus	0.973184707454111
LatentSpace_167	27700	Caudoputamen	caudate nucleus	0.964357125063941
LatentSpace_167	27701	Caudoputamen	caudate nucleus	0.955089185315548
LatentSpace_167	27702	Caudoputamen	caudate nucleus	0.946530228026102
LatentSpace_167	27703	Caudoputamen	caudate nucleus	0.926161128816616
LatentSpace_167	27704	Caudoputamen	caudate nucleus	0.863382869182036
LatentSpace_167	27721	Caudoputamen	caudate nucleus	0.784839322957355
LatentSpace_167	27722	Caudoputamen	caudate nucleus	0.883321592209413
LatentSpace_167	27723	Caudoputamen	caudate nucleus	0.924482255762467
LatentSpace_167	27724	Caudoputamen	caudate nucleus	0.944902849159066
LatentSpace_167	27725	Caudoputamen	caudate nucleus	0.954450698906635
LatentSpace_167	27726	Caudoputamen	caudate nucleus	0.951952707647052
LatentSpace_167	27727	Caudoputamen	caudate nucleus	0.901530411615984
LatentSpace_167	27732	Caudoputamen	caudate nucleus	0.897930725380847
LatentSpace_167	27733	Caudoputamen	caudate nucleus	0.946019562209614
LatentSpace_167	27734	Caudoputamen	caudate nucleus	0.946682220536794
LatentSpace_167	27735	Caudoputamen	caudate nucleus	0.939354746471193
LatentSpace_167	27736	Caudoputamen	caudate nucleus	0.925721735594206
LatentSpace_167	27737	Caudoputamen	caudate nucleus	0.899684011978282
LatentSpace_167	29031	Caudoputamen	caudate nucleus	0.883901543494891
LatentSpace_167	29055	Caudoputamen	caudate nucleus	0.887329318664814
LatentSpace_167	29067	Caudoputamen	caudate nucleus	0.880188232072401
LatentSpace_167	29068	Caudoputamen	putamen	0.910920932539036
LatentSpace_167	29092	Caudoputamen	caudate nucleus	0.918060009137372
LatentSpace_167	29093	Caudoputamen	caudate nucleus	0.851304785685628
LatentSpace_167	29105	Caudoputamen	caudate nucleus	0.907168265535888
LatentSpace_167	29106	Caudoputamen	putamen	0.918660309620554
LatentSpace_167	29128	Caudoputamen	caudate nucleus	0.918708153719905
LatentSpace_167	29129	Caudoputamen	caudate nucleus	0.743076706047338
LatentSpace_167	29142	Caudoputamen	caudate nucleus	0.838539808542845
LatentSpace_167	29143	Caudoputamen	caudate nucleus	0.918135639423783
LatentSpace_167	29165	Caudoputamen	caudate nucleus	0.930488983056974
LatentSpace_167	29166	Caudoputamen	caudate nucleus	0.857981065944117
LatentSpace_167	29179	Caudoputamen	caudate nucleus	0.725881982609549
LatentSpace_167	29180	Caudoputamen	caudate nucleus	0.87987568475971
LatentSpace_167	29181	Caudoputamen	caudate nucleus	0.922911496967183
LatentSpace_167	29203	Caudoputamen	caudate nucleus	0.927220651023637
LatentSpace_167	29204	Caudoputamen	caudate nucleus	0.901831032845072
LatentSpace_167	29205	Caudoputamen	caudate nucleus	0.777504896248577
LatentSpace_167	29218	Caudoputamen	caudate nucleus	0.691622972696948
LatentSpace_167	29219	Caudoputamen	caudate nucleus	0.85491849349319
LatentSpace_167	29220	Caudoputamen	caudate nucleus	0.906930739948713
LatentSpace_167	29221	Caudoputamen	caudate nucleus	0.917761510851219
LatentSpace_167	29240	Caudoputamen	caudate nucleus	0.927992015132825
LatentSpace_167	29241	Caudoputamen	caudate nucleus	0.911252604881147
LatentSpace_167	29242	Caudoputamen	caudate nucleus	0.866496903273807
LatentSpace_167	29243	Caudoputamen	caudate nucleus	0.7254488963201
LatentSpace_167	29256	Caudoputamen	caudate nucleus	0.846691331669225
LatentSpace_167	29257	Caudoputamen	caudate nucleus	0.900485455756287
LatentSpace_167	29258	Caudoputamen	caudate nucleus	0.91483228610155
LatentSpace_167	29259	Caudoputamen	caudate nucleus	0.918814477538715
LatentSpace_167	29272	Caudoputamen	caudate nucleus	0.937892584067593
LatentSpace_167	29273	Caudoputamen	caudate nucleus	0.924487716852945
LatentSpace_167	29274	Caudoputamen	caudate nucleus	0.90766054373557
LatentSpace_167	29275	Caudoputamen	caudate nucleus	0.865491362184074
LatentSpace_167	29276	Caudoputamen	caudate nucleus	0.705948398163757
LatentSpace_167	29289	Caudoputamen	caudate nucleus	0.839737756192388
LatentSpace_167	29290	Caudoputamen	caudate nucleus	0.901102048285913
LatentSpace_167	29291	Caudoputamen	caudate nucleus	0.917368321067127
LatentSpace_167	29292	Caudoputamen	caudate nucleus	0.926248943449311
LatentSpace_167	29293	Caudoputamen	caudate nucleus	0.935317013867531
LatentSpace_167	29294	Caudoputamen	putamen	0.937326501481123
LatentSpace_167	29296	Caudoputamen	caudate nucleus	0.94569112895538
LatentSpace_167	29297	Caudoputamen	caudate nucleus	0.935436935654203
LatentSpace_167	29298	Caudoputamen	caudate nucleus	0.915738635112001
LatentSpace_167	29299	Caudoputamen	caudate nucleus	0.899344489289075
LatentSpace_167	29300	Caudoputamen	caudate nucleus	0.842937720773499
LatentSpace_167	29301	Caudoputamen	caudate nucleus	0.631763747584076
LatentSpace_167	29315	Caudoputamen	caudate nucleus	0.782076342637757
LatentSpace_167	29316	Caudoputamen	caudate nucleus	0.887893848798977
LatentSpace_167	29317	Caudoputamen	caudate nucleus	0.907224295807248
LatentSpace_167	29318	Caudoputamen	caudate nucleus	0.917133400049116
LatentSpace_167	29319	Caudoputamen	caudate nucleus	0.922894924069672
LatentSpace_167	29320	Caudoputamen	caudate nucleus	0.933102561206275
LatentSpace_167	29321	Caudoputamen	caudate nucleus	0.9411558573305
LatentSpace_167	29322	Caudoputamen	caudate nucleus	0.947138231723948
LatentSpace_167	29323	Caudoputamen	caudate nucleus	0.943984105407486
LatentSpace_167	29324	Caudoputamen	caudate nucleus	0.936622923768436
LatentSpace_167	29325	Caudoputamen	caudate nucleus	0.923835132472829
LatentSpace_167	29326	Caudoputamen	caudate nucleus	0.901509761962048
LatentSpace_167	29327	Caudoputamen	caudate nucleus	0.875107767402969
LatentSpace_167	29328	Caudoputamen	caudate nucleus	0.769226080214075
LatentSpace_167	29343	Caudoputamen	caudate nucleus	0.70547934580598
LatentSpace_167	29344	Caudoputamen	caudate nucleus	0.857090418236467
LatentSpace_167	29345	Caudoputamen	caudate nucleus	0.89686373646528
LatentSpace_167	29346	Caudoputamen	caudate nucleus	0.90537131326264
LatentSpace_167	29347	Caudoputamen	caudate nucleus	0.911179988172796
LatentSpace_167	29348	Caudoputamen	caudate nucleus	0.919957686264125
LatentSpace_167	29349	Caudoputamen	caudate nucleus	0.927999469065393
LatentSpace_167	29350	Caudoputamen	caudate nucleus	0.93940221265405
LatentSpace_167	29351	Caudoputamen	caudate nucleus	0.946817007760923
LatentSpace_167	29352	Caudoputamen	putamen	0.942232809961807
LatentSpace_167	29353	Caudoputamen	caudate nucleus	0.944711994398495
LatentSpace_167	29354	Caudoputamen	caudate nucleus	0.94074203244304
LatentSpace_167	29355	Caudoputamen	caudate nucleus	0.939790257700765
LatentSpace_167	29356	Caudoputamen	caudate nucleus	0.934419926572984
LatentSpace_167	29357	Caudoputamen	caudate nucleus	0.924340582471975
LatentSpace_167	29358	Caudoputamen	caudate nucleus	0.914347451955574
LatentSpace_167	29359	Caudoputamen	caudate nucleus	0.895595255030464
LatentSpace_167	29360	Caudoputamen	caudate nucleus	0.84667982220292
LatentSpace_167	29361	Caudoputamen	caudate nucleus	0.651827595983063
LatentSpace_167	29376	Caudoputamen	caudate nucleus	0.800883960671231
LatentSpace_167	29377	Caudoputamen	caudate nucleus	0.873950204615642
LatentSpace_167	29378	Caudoputamen	caudate nucleus	0.888941153195103
LatentSpace_167	29379	Caudoputamen	caudate nucleus	0.896430025032941
LatentSpace_167	29380	Caudoputamen	caudate nucleus	0.905182114942949
LatentSpace_167	29381	Caudoputamen	caudate nucleus	0.915275988079848
LatentSpace_167	29382	Caudoputamen	caudate nucleus	0.926655543338547
LatentSpace_167	29383	Caudoputamen	caudate nucleus	0.936049168256461
LatentSpace_167	29384	Caudoputamen	caudate nucleus	0.950635774229973
LatentSpace_167	29385	Caudoputamen	caudate nucleus	0.953166998736569
LatentSpace_167	29386	Caudoputamen	putamen	0.906521583559794
LatentSpace_167	29387	Lateral septal complex	septal nuclei	0.863211623087315
LatentSpace_167	29388	Lateral septal complex	septal nuclei	0.863831175332663
LatentSpace_167	29389	Lateral septal complex	septal nuclei	0.8454222149919
LatentSpace_167	29390	Caudoputamen	putamen	0.914292380988814
LatentSpace_167	29391	Caudoputamen	putamen	0.95624573177056
LatentSpace_167	29392	Caudoputamen	caudate nucleus	0.954174924717546
LatentSpace_167	29393	Caudoputamen	caudate nucleus	0.946011281427146
LatentSpace_167	29394	Caudoputamen	caudate nucleus	0.940308621200805
LatentSpace_167	29395	Caudoputamen	caudate nucleus	0.934941289391648
LatentSpace_167	29396	Caudoputamen	caudate nucleus	0.930828915721904
LatentSpace_167	29397	Caudoputamen	caudate nucleus	0.925789964163593
LatentSpace_167	29398	Caudoputamen	caudate nucleus	0.912971652283174
LatentSpace_167	29399	Caudoputamen	caudate nucleus	0.883794627388161
LatentSpace_167	29400	Caudoputamen	caudate nucleus	0.792498195202202
LatentSpace_167	29415	Caudoputamen	caudate nucleus	0.847873207664847
LatentSpace_167	29416	Caudoputamen	caudate nucleus	0.889371283617822
LatentSpace_167	29417	Caudoputamen	caudate nucleus	0.89863390187765
LatentSpace_167	29418	Caudoputamen	caudate nucleus	0.906583232646924
LatentSpace_167	29419	Caudoputamen	caudate nucleus	0.918940986599027
LatentSpace_167	29420	Caudoputamen	caudate nucleus	0.932478686443885
LatentSpace_167	29421	Caudoputamen	caudate nucleus	0.938804504429083
LatentSpace_167	29422	Caudoputamen	caudate nucleus	0.9500975632856
LatentSpace_167	29423	Caudoputamen	caudate nucleus	0.963518775935096
LatentSpace_167	29424	Caudoputamen	caudate nucleus	0.942536476578994
LatentSpace_167	29425	Lateral septal complex	septal nuclei	0.859670140151224
LatentSpace_167	29426	Lateral septal complex	septal nuclei	0.869022201915134
LatentSpace_167	29427	Lateral septal complex	septal nuclei	0.865472044259971
LatentSpace_167	29428	Lateral septal complex	septal nuclei	0.860954157668893
LatentSpace_167	29429	Lateral septal complex	nucleus accumbens	0.871316080275449
LatentSpace_167	29430	Caudoputamen	putamen	0.943269358653428
LatentSpace_167	29431	Caudoputamen	caudate nucleus	0.959169512615978
LatentSpace_167	29432	Caudoputamen	caudate nucleus	0.953289847960506
LatentSpace_167	29433	Caudoputamen	caudate nucleus	0.94721147845515
LatentSpace_167	29434	Caudoputamen	caudate nucleus	0.94178026543688
LatentSpace_167	29435	Caudoputamen	caudate nucleus	0.933848033723498
LatentSpace_167	29436	Caudoputamen	caudate nucleus	0.932246260226334
LatentSpace_167	29437	Caudoputamen	caudate nucleus	0.927953326559129
LatentSpace_167	29438	Caudoputamen	caudate nucleus	0.911094403763608
LatentSpace_167	29439	Caudoputamen	caudate nucleus	0.859899971796985
LatentSpace_167	29440	Caudoputamen	caudate nucleus	0.704614464330847
LatentSpace_167	29455	Caudoputamen	caudate nucleus	0.801990367407507
LatentSpace_167	29456	Caudoputamen	caudate nucleus	0.87322757175681
LatentSpace_167	29457	Caudoputamen	caudate nucleus	0.901554284196993
LatentSpace_167	29458	Caudoputamen	caudate nucleus	0.917987994058187
LatentSpace_167	29459	Caudoputamen	caudate nucleus	0.927362222007824
LatentSpace_167	29460	Caudoputamen	caudate nucleus	0.931149683607845
LatentSpace_167	29461	Caudoputamen	caudate nucleus	0.942665372944588
LatentSpace_167	29462	Caudoputamen	caudate nucleus	0.949147148735145
LatentSpace_167	29463	Caudoputamen	caudate nucleus	0.961969244592891
LatentSpace_167	29464	Caudoputamen	caudate nucleus	0.965508317121776
LatentSpace_167	29465	Caudoputamen	nucleus accumbens	0.912494685681838
LatentSpace_167	29466	Lateral septal complex	septal nuclei	0.843235062404488
LatentSpace_167	29467	Lateral septal complex	septal nuclei	0.859727731384377
LatentSpace_167	29468	Lateral septal complex	septal nuclei	0.873152230853389
LatentSpace_167	29469	Lateral septal complex	septal nuclei	0.88754448752099
LatentSpace_167	29470	Lateral septal complex	septal nuclei	0.876255360480345
LatentSpace_167	29471	Lateral septal complex	septal nuclei	0.864940368239088
LatentSpace_167	29472	Lateral septal complex	septal nuclei	0.850972511633528
LatentSpace_167	29473	Caudoputamen	nucleus accumbens	0.903120306236594
LatentSpace_167	29474	Caudoputamen	caudate nucleus	0.955033355476019
LatentSpace_167	29475	Caudoputamen	caudate nucleus	0.959501417034556
LatentSpace_167	29476	Caudoputamen	caudate nucleus	0.950743838195672
LatentSpace_167	29477	Caudoputamen	caudate nucleus	0.945071870785739
LatentSpace_167	29478	Caudoputamen	caudate nucleus	0.937202888568448
LatentSpace_167	29479	Caudoputamen	caudate nucleus	0.928792065267883
LatentSpace_167	29480	Caudoputamen	caudate nucleus	0.92483183987328
LatentSpace_167	29481	Caudoputamen	caudate nucleus	0.918362812542197
LatentSpace_167	29482	Caudoputamen	caudate nucleus	0.895455310704524
LatentSpace_167	29483	Caudoputamen	caudate nucleus	0.801207625834106
LatentSpace_167	29498	Caudoputamen	caudate nucleus	0.707318784755815
LatentSpace_167	29499	Caudoputamen	caudate nucleus	0.831438020143547
LatentSpace_167	29500	Caudoputamen	caudate nucleus	0.884241741360032
LatentSpace_167	29501	Caudoputamen	caudate nucleus	0.908372337270207
LatentSpace_167	29502	Caudoputamen	caudate nucleus	0.916331368621902
LatentSpace_167	29503	Caudoputamen	caudate nucleus	0.922075153426051
LatentSpace_167	29504	Caudoputamen	caudate nucleus	0.938723445833347
LatentSpace_167	29505	Caudoputamen	caudate nucleus	0.950346262481672
LatentSpace_167	29506	Caudoputamen	caudate nucleus	0.961569123552542
LatentSpace_167	29507	Caudoputamen	caudate nucleus	0.970444394110956
LatentSpace_167	29508	Caudoputamen	caudate nucleus	0.92732122889511
LatentSpace_167	29509	Lateral septal complex	nucleus accumbens	0.87115377665043
LatentSpace_167	29510	Lateral septal complex	septal nuclei	0.865538990131557
LatentSpace_167	29511	Lateral septal complex	septal nuclei	0.882695595084106
LatentSpace_167	29512	Lateral septal complex	septal nuclei	0.89000990230221
LatentSpace_167	29513	Lateral septal complex	septal nuclei	0.89132670387942
LatentSpace_167	29514	Lateral septal complex	septal nuclei	0.886581908090644
LatentSpace_167	29515	Lateral septal complex	septal nuclei	0.885353592053894
LatentSpace_167	29516	Lateral septal complex	nucleus accumbens	0.869651628511797
LatentSpace_167	29517	Caudoputamen	nucleus accumbens	0.927370945556825
LatentSpace_167	29518	Caudoputamen	caudate nucleus	0.970202363772395
LatentSpace_167	29519	Caudoputamen	caudate nucleus	0.96694253236106
LatentSpace_167	29520	Caudoputamen	caudate nucleus	0.956042879614198
LatentSpace_167	29521	Caudoputamen	caudate nucleus	0.947498649805713
LatentSpace_167	29522	Caudoputamen	caudate nucleus	0.94066015405688
LatentSpace_167	29523	Caudoputamen	caudate nucleus	0.931613389387061
LatentSpace_167	29524	Caudoputamen	caudate nucleus	0.923005361007974
LatentSpace_167	29525	Caudoputamen	caudate nucleus	0.907096650095559
LatentSpace_167	29526	Caudoputamen	caudate nucleus	0.845985605240607
LatentSpace_167	29540	Caudoputamen	caudate nucleus	0.771113802687586
LatentSpace_167	29541	Caudoputamen	caudate nucleus	0.869405402486572
LatentSpace_167	29542	Caudoputamen	caudate nucleus	0.9037600916131
LatentSpace_167	29543	Caudoputamen	caudate nucleus	0.918353924210677
LatentSpace_167	29544	Caudoputamen	caudate nucleus	0.932103753927052
LatentSpace_167	29545	Caudoputamen	caudate nucleus	0.949769310310371
LatentSpace_167	29546	Caudoputamen	caudate nucleus	0.962154937110765
LatentSpace_167	29547	Caudoputamen	caudate nucleus	0.971184524848401
LatentSpace_167	29548	Caudoputamen	caudate nucleus	0.977028629746503
LatentSpace_167	29549	Caudoputamen	caudate nucleus	0.960462944467862
LatentSpace_167	29550	Lateral septal complex	septal nuclei	0.87174997720961
LatentSpace_167	29551	Lateral septal complex	septal nuclei	0.883743737079845
LatentSpace_167	29552	Lateral septal complex	septal nuclei	0.884668510885969
LatentSpace_167	29553	Lateral septal complex	septal nuclei	0.890537894663985
LatentSpace_167	29554	Lateral septal complex	septal nuclei	0.887244159489696
LatentSpace_167	29555	Lateral septal complex	septal nuclei	0.881282302937875
LatentSpace_167	29556	Caudoputamen	caudate nucleus	0.952023046459143
LatentSpace_167	29557	Caudoputamen	caudate nucleus	0.97622189023815
LatentSpace_167	29558	Caudoputamen	caudate nucleus	0.976527487314328
LatentSpace_167	29559	Caudoputamen	caudate nucleus	0.969090183712434
LatentSpace_167	29560	Caudoputamen	caudate nucleus	0.962769597482634
LatentSpace_167	29561	Caudoputamen	caudate nucleus	0.961070779509357
LatentSpace_167	29562	Caudoputamen	caudate nucleus	0.95367152127989
LatentSpace_167	29563	Caudoputamen	caudate nucleus	0.938058966997231
LatentSpace_167	29564	Caudoputamen	caudate nucleus	0.900401154561486
LatentSpace_167	29565	Caudoputamen	caudate nucleus	0.775159334930947
LatentSpace_167	29580	Caudoputamen	caudate nucleus	0.841313867233635
LatentSpace_167	29581	Caudoputamen	caudate nucleus	0.917243111864022
LatentSpace_167	29582	Caudoputamen	caudate nucleus	0.937953336488628
LatentSpace_167	29583	Caudoputamen	caudate nucleus	0.948951743082949
LatentSpace_167	29584	Caudoputamen	caudate nucleus	0.960094539221775
LatentSpace_167	29585	Caudoputamen	caudate nucleus	0.971279280638787
LatentSpace_167	29586	Caudoputamen	caudate nucleus	0.976886881330435
LatentSpace_167	29587	Caudoputamen	caudate nucleus	0.978138739805376
LatentSpace_167	29588	Caudoputamen	caudate nucleus	0.962426621903958
LatentSpace_167	29589	Caudoputamen	caudate nucleus	0.95515666507236
LatentSpace_167	29590	Caudoputamen	caudate nucleus	0.971696065861567
LatentSpace_167	29591	Caudoputamen	caudate nucleus	0.977458469484719
LatentSpace_167	29592	Caudoputamen	caudate nucleus	0.975815178701699
LatentSpace_167	29593	Caudoputamen	caudate nucleus	0.968418616061486
LatentSpace_167	29594	Caudoputamen	caudate nucleus	0.967032444068776
LatentSpace_167	29595	Caudoputamen	caudate nucleus	0.956333133377851
LatentSpace_167	29596	Caudoputamen	caudate nucleus	0.918084487022358
LatentSpace_167	29597	Caudoputamen	caudate nucleus	0.80312360650302
LatentSpace_167	29613	Caudoputamen	caudate nucleus	0.905690370410565
LatentSpace_167	29614	Caudoputamen	caudate nucleus	0.938801239018311
LatentSpace_167	29615	Caudoputamen	caudate nucleus	0.953711499541105
LatentSpace_167	29616	Caudoputamen	caudate nucleus	0.965511513266273
LatentSpace_167	29617	Caudoputamen	caudate nucleus	0.973191771164183
LatentSpace_167	29618	Caudoputamen	caudate nucleus	0.970030166858301
LatentSpace_167	29619	Caudoputamen	caudate nucleus	0.941758681525272
LatentSpace_167	29620	Caudoputamen	caudate nucleus	0.946987394771725
LatentSpace_167	29621	Caudoputamen	caudate nucleus	0.964646915527947
LatentSpace_167	29622	Caudoputamen	caudate nucleus	0.966807233109259
LatentSpace_167	29623	Caudoputamen	caudate nucleus	0.962983217038273
LatentSpace_167	29624	Caudoputamen	caudate nucleus	0.95632458276788
LatentSpace_167	29625	Caudoputamen	caudate nucleus	0.94455362038657
LatentSpace_167	29626	Caudoputamen	caudate nucleus	0.9035796079657
LatentSpace_167	29644	Caudoputamen	caudate nucleus	0.863636060393588
LatentSpace_167	29645	Caudoputamen	caudate nucleus	0.917378839944402
LatentSpace_167	29646	Caudoputamen	caudate nucleus	0.939964811491575
LatentSpace_167	29647	Caudoputamen	caudate nucleus	0.945843291416914
LatentSpace_167	29652	Caudoputamen	caudate nucleus	0.929168036051632
LatentSpace_167	29653	Caudoputamen	caudate nucleus	0.9286910634987
LatentSpace_167	29654	Caudoputamen	caudate nucleus	0.91356528024469
LatentSpace_167	30979	Caudoputamen	caudate nucleus	0.889071707277578
LatentSpace_167	30980	Caudoputamen	putamen	0.834224151249468
LatentSpace_167	31003	Caudoputamen	caudate nucleus	0.886522109735493
LatentSpace_167	31016	Caudoputamen	caudate nucleus	0.861813789308769
LatentSpace_167	31017	Caudoputamen	putamen	0.905196638120913
LatentSpace_167	31037	Caudoputamen	caudate nucleus	0.91522706468984
LatentSpace_167	31038	Caudoputamen	caudate nucleus	0.863675808186884
LatentSpace_167	31051	Caudoputamen	caudate nucleus	0.760589022350041
LatentSpace_167	31052	Caudoputamen	caudate nucleus	0.895817655337993
LatentSpace_167	31072	Caudoputamen	caudate nucleus	0.909553649531862
LatentSpace_167	31087	Caudoputamen	caudate nucleus	0.839942539835041
LatentSpace_167	31088	Caudoputamen	caudate nucleus	0.907138589579122
LatentSpace_167	31089	Caudoputamen	putamen	0.920521143610154
LatentSpace_167	31107	Caudoputamen	caudate nucleus	0.918665454401072
LatentSpace_167	31108	Caudoputamen	caudate nucleus	0.8649072325036
LatentSpace_167	31121	Caudoputamen	caudate nucleus	0.805391631758286
LatentSpace_167	31122	Caudoputamen	caudate nucleus	0.889134128955999
LatentSpace_167	31123	Caudoputamen	caudate nucleus	0.913668753199863
LatentSpace_167	31124	Caudoputamen	putamen	0.918731314010654
LatentSpace_167	31140	Caudoputamen	putamen	0.940737456006607
LatentSpace_167	31141	Caudoputamen	caudate nucleus	0.925665957272066
LatentSpace_167	31142	Caudoputamen	caudate nucleus	0.899144888457199
LatentSpace_167	31143	Caudoputamen	caudate nucleus	0.818254766330017
LatentSpace_167	31156	Caudoputamen	caudate nucleus	0.784246025543002
LatentSpace_167	31157	Caudoputamen	caudate nucleus	0.887405093745791
LatentSpace_167	31158	Caudoputamen	caudate nucleus	0.913505268804454
LatentSpace_167	31159	Caudoputamen	caudate nucleus	0.923032677723832
LatentSpace_167	31162	Caudoputamen	caudate nucleus	0.944152151798172
LatentSpace_167	31163	Caudoputamen	caudate nucleus	0.939113216204949
LatentSpace_167	31164	Caudoputamen	caudate nucleus	0.922084564967054
LatentSpace_167	31165	Caudoputamen	caudate nucleus	0.897173313249813
LatentSpace_167	31166	Caudoputamen	caudate nucleus	0.803080769364733
LatentSpace_167	31180	Caudoputamen	caudate nucleus	0.884372789303858
LatentSpace_167	31181	Caudoputamen	caudate nucleus	0.913586197540477
LatentSpace_167	31182	Caudoputamen	caudate nucleus	0.927720608762008
LatentSpace_167	31183	Caudoputamen	caudate nucleus	0.938474662740905
LatentSpace_167	31184	Caudoputamen	caudate nucleus	0.942457691319893
LatentSpace_167	31185	Caudoputamen	putamen	0.9154386020198
LatentSpace_167	31186	Caudoputamen	caudate nucleus	0.953027681209935
LatentSpace_167	31187	Caudoputamen	caudate nucleus	0.945601256866049
LatentSpace_167	31188	Caudoputamen	caudate nucleus	0.933701414889148
LatentSpace_167	31189	Caudoputamen	caudate nucleus	0.910999348362862
LatentSpace_167	31190	Caudoputamen	caudate nucleus	0.884526363318252
LatentSpace_167	31191	Caudoputamen	caudate nucleus	0.759954305433195
LatentSpace_167	31206	Caudoputamen	caudate nucleus	0.859582569452365
LatentSpace_167	31207	Caudoputamen	caudate nucleus	0.906443073420384
LatentSpace_167	31208	Caudoputamen	caudate nucleus	0.916077443120547
LatentSpace_167	31209	Caudoputamen	caudate nucleus	0.923390520053587
LatentSpace_167	31210	Caudoputamen	caudate nucleus	0.932927103050266
LatentSpace_167	31211	Caudoputamen	caudate nucleus	0.94519839410353
LatentSpace_167	31212	Caudoputamen	putamen	0.949797921836604
LatentSpace_167	31213	Caudoputamen	putamen	0.936572127187503
LatentSpace_167	31214	Caudoputamen	putamen	0.79535755511997
LatentSpace_167	31215	Caudoputamen	putamen	0.932146639406918
LatentSpace_167	31216	Caudoputamen	caudate nucleus	0.945899022587953
LatentSpace_167	31217	Caudoputamen	caudate nucleus	0.949244611545788
LatentSpace_167	31218	Caudoputamen	caudate nucleus	0.947867567697974
LatentSpace_167	31219	Caudoputamen	caudate nucleus	0.937258896240707
LatentSpace_167	31220	Caudoputamen	caudate nucleus	0.920655873813879
LatentSpace_167	31221	Caudoputamen	caudate nucleus	0.894279302958592
LatentSpace_167	31222	Caudoputamen	caudate nucleus	0.833478375535348
LatentSpace_167	31238	Caudoputamen	caudate nucleus	0.810393655369969
LatentSpace_167	31239	Caudoputamen	caudate nucleus	0.890907789910215
LatentSpace_167	31240	Caudoputamen	caudate nucleus	0.907427210695917
LatentSpace_167	31241	Caudoputamen	caudate nucleus	0.911496906049033
LatentSpace_167	31242	Caudoputamen	caudate nucleus	0.920221263747223
LatentSpace_167	31243	Caudoputamen	caudate nucleus	0.930039337208437
LatentSpace_167	31244	Caudoputamen	caudate nucleus	0.94178467839909
LatentSpace_167	31245	Caudoputamen	caudate nucleus	0.949993243673712
LatentSpace_167	31246	Caudoputamen	putamen	0.951509149484399
LatentSpace_167	31247	Caudoputamen	putamen	0.918370477153653
LatentSpace_167	31248	Lateral septal complex	septal nuclei	0.840071554584055
LatentSpace_167	31249	Caudoputamen	putamen	0.948692678173735
LatentSpace_167	31250	Caudoputamen	caudate nucleus	0.947333945834318
LatentSpace_167	31251	Caudoputamen	caudate nucleus	0.944581488181045
LatentSpace_167	31252	Caudoputamen	caudate nucleus	0.942647410852095
LatentSpace_167	31253	Caudoputamen	caudate nucleus	0.937793494386582
LatentSpace_167	31254	Caudoputamen	caudate nucleus	0.927079753422427
LatentSpace_167	31255	Caudoputamen	caudate nucleus	0.912170570997903
LatentSpace_167	31256	Caudoputamen	caudate nucleus	0.87051988111664
LatentSpace_167	31257	Caudoputamen	caudate nucleus	0.762677656479566
LatentSpace_167	31271	Caudoputamen	caudate nucleus	0.860402917558642
LatentSpace_167	31272	Caudoputamen	caudate nucleus	0.897155921517608
LatentSpace_167	31273	Caudoputamen	caudate nucleus	0.895315692246309
LatentSpace_167	31274	Caudoputamen	caudate nucleus	0.902710375690982
LatentSpace_167	31275	Caudoputamen	caudate nucleus	0.912844298943622
LatentSpace_167	31276	Caudoputamen	caudate nucleus	0.924744863738011
LatentSpace_167	31277	Caudoputamen	caudate nucleus	0.937634700811068
LatentSpace_167	31278	Caudoputamen	caudate nucleus	0.953266677293022
LatentSpace_167	31279	Caudoputamen	caudate nucleus	0.956724432701577
LatentSpace_167	31280	Caudoputamen	putamen	0.914136440594802
LatentSpace_167	31281	Lateral septal complex	septal nuclei	0.876156253396553
LatentSpace_167	31282	Lateral septal complex	septal nuclei	0.871097615642839
LatentSpace_167	31283	Lateral septal complex	septal nuclei	0.8571803106742
LatentSpace_167	31284	Caudoputamen	putamen	0.960103699620366
LatentSpace_167	31285	Caudoputamen	caudate nucleus	0.955290373599615
LatentSpace_167	31286	Caudoputamen	caudate nucleus	0.949411669026249
LatentSpace_167	31287	Caudoputamen	caudate nucleus	0.9444022780205
LatentSpace_167	31288	Caudoputamen	caudate nucleus	0.939634265286909
LatentSpace_167	31289	Caudoputamen	caudate nucleus	0.936711122676927
LatentSpace_167	31290	Caudoputamen	caudate nucleus	0.930091341877486
LatentSpace_167	31291	Caudoputamen	caudate nucleus	0.908839506083347
LatentSpace_167	31292	Caudoputamen	caudate nucleus	0.850480315480107
LatentSpace_167	31308	Caudoputamen	caudate nucleus	0.802238671936233
LatentSpace_167	31309	Caudoputamen	caudate nucleus	0.890791295777298
LatentSpace_167	31310	Caudoputamen	caudate nucleus	0.898968322372373
LatentSpace_167	31311	Caudoputamen	caudate nucleus	0.904325900666631
LatentSpace_167	31312	Caudoputamen	caudate nucleus	0.912588247678116
LatentSpace_167	31313	Caudoputamen	caudate nucleus	0.924205590926528
LatentSpace_167	31314	Caudoputamen	caudate nucleus	0.939757111821051
LatentSpace_167	31315	Caudoputamen	caudate nucleus	0.955067754284447
LatentSpace_167	31316	Caudoputamen	caudate nucleus	0.967102157016851
LatentSpace_167	31317	Caudoputamen	caudate nucleus	0.946262133378878
LatentSpace_167	31318	Lateral septal complex	septal nuclei	0.862204260918443
LatentSpace_167	31319	Lateral septal complex	septal nuclei	0.867618912961016
LatentSpace_167	31320	Lateral septal complex	septal nuclei	0.863562679837318
LatentSpace_167	31321	Lateral septal complex	septal nuclei	0.868837851736145
LatentSpace_167	31322	Lateral septal complex	septal nuclei	0.86008093944881
LatentSpace_167	31323	Lateral septal complex	septal nuclei	0.857013080855142
LatentSpace_167	31324	Lateral septal complex	nucleus accumbens	0.878190162927152
LatentSpace_167	31325	Caudoputamen	putamen	0.942954891205278
LatentSpace_167	31326	Caudoputamen	caudate nucleus	0.960811436899872
LatentSpace_167	31327	Caudoputamen	caudate nucleus	0.954955504284161
LatentSpace_167	31328	Caudoputamen	caudate nucleus	0.948598939852589
LatentSpace_167	31329	Caudoputamen	caudate nucleus	0.942692794318358
LatentSpace_167	31330	Caudoputamen	caudate nucleus	0.938568748043932
LatentSpace_167	31331	Caudoputamen	caudate nucleus	0.93806202257109
LatentSpace_167	31332	Caudoputamen	caudate nucleus	0.928308857940903
LatentSpace_167	31333	Caudoputamen	caudate nucleus	0.89132450772212
LatentSpace_167	31334	Caudoputamen	caudate nucleus	0.787071609795084
LatentSpace_167	31349	Caudoputamen	caudate nucleus	0.852119958220665
LatentSpace_167	31350	Caudoputamen	caudate nucleus	0.897615344653608
LatentSpace_167	31351	Caudoputamen	caudate nucleus	0.917533501142534
LatentSpace_167	31352	Caudoputamen	caudate nucleus	0.92480276568079
LatentSpace_167	31353	Caudoputamen	caudate nucleus	0.931174242116524
LatentSpace_167	31354	Caudoputamen	caudate nucleus	0.942636788855473
LatentSpace_167	31355	Caudoputamen	caudate nucleus	0.951482798345606
LatentSpace_167	31356	Caudoputamen	caudate nucleus	0.965821606978576
LatentSpace_167	31357	Caudoputamen	caudate nucleus	0.967244402272899
LatentSpace_167	31358	Caudoputamen	nucleus accumbens	0.913877746109589
LatentSpace_167	31359	Lateral septal complex	nucleus accumbens	0.841642090748717
LatentSpace_167	31360	Lateral septal complex	septal nuclei	0.856953820348416
LatentSpace_167	31361	Lateral septal complex	septal nuclei	0.868733229800948
LatentSpace_167	31362	Lateral septal complex	septal nuclei	0.871513267963285
LatentSpace_167	31363	Lateral septal complex	septal nuclei	0.875256541477036
LatentSpace_167	31364	Lateral septal complex	septal nuclei	0.869561625072039
LatentSpace_167	31365	Lateral septal complex	septal nuclei	0.861897012277864
LatentSpace_167	31366	Lateral septal complex	nucleus accumbens	0.843300680237203
LatentSpace_167	31367	Caudoputamen	caudate nucleus	0.959626701616504
LatentSpace_167	31368	Caudoputamen	caudate nucleus	0.961270512443446
LatentSpace_167	31369	Caudoputamen	caudate nucleus	0.952748431867425
LatentSpace_167	31370	Caudoputamen	caudate nucleus	0.942416040293589
LatentSpace_167	31371	Caudoputamen	caudate nucleus	0.936528284091916
LatentSpace_167	31372	Caudoputamen	caudate nucleus	0.9269334348694
LatentSpace_167	31373	Caudoputamen	caudate nucleus	0.92348012631073
LatentSpace_167	31374	Caudoputamen	caudate nucleus	0.907700836318611
LatentSpace_167	31375	Caudoputamen	caudate nucleus	0.852835928755456
LatentSpace_167	31391	Caudoputamen	caudate nucleus	0.766536947156873
LatentSpace_167	31392	Caudoputamen	caudate nucleus	0.872015304255625
LatentSpace_167	31393	Caudoputamen	caudate nucleus	0.903882977821736
LatentSpace_167	31394	Caudoputamen	caudate nucleus	0.916124215442305
LatentSpace_167	31395	Caudoputamen	caudate nucleus	0.926442071169832
LatentSpace_167	31396	Caudoputamen	caudate nucleus	0.946903303774752
LatentSpace_167	31397	Caudoputamen	caudate nucleus	0.954167386685118
LatentSpace_167	31398	Caudoputamen	caudate nucleus	0.96451690892925
LatentSpace_167	31399	Caudoputamen	caudate nucleus	0.969640982512197
LatentSpace_167	31400	Caudoputamen	caudate nucleus	0.938229566045493
LatentSpace_167	31401	Lateral septal complex	septal nuclei	0.856777938187469
LatentSpace_167	31402	Lateral septal complex	septal nuclei	0.871882933109199
LatentSpace_167	31403	Lateral septal complex	septal nuclei	0.875625454285852
LatentSpace_167	31404	Lateral septal complex	septal nuclei	0.875181521883483
LatentSpace_167	31405	Lateral septal complex	septal nuclei	0.873901692290841
LatentSpace_167	31406	Lateral septal complex	septal nuclei	0.871421304207325
LatentSpace_167	31407	Caudoputamen	caudate nucleus	0.939129180351903
LatentSpace_167	31408	Caudoputamen	caudate nucleus	0.969229018128767
LatentSpace_167	31409	Caudoputamen	caudate nucleus	0.967092541661783
LatentSpace_167	31410	Caudoputamen	caudate nucleus	0.953967872869519
LatentSpace_167	31411	Caudoputamen	caudate nucleus	0.942967293275534
LatentSpace_167	31412	Caudoputamen	caudate nucleus	0.938412150324889
LatentSpace_167	31413	Caudoputamen	caudate nucleus	0.928299596851723
LatentSpace_167	31414	Caudoputamen	caudate nucleus	0.911730657989357
LatentSpace_167	31415	Caudoputamen	caudate nucleus	0.869689677143077
LatentSpace_167	31416	Caudoputamen	caudate nucleus	0.744355507232065
LatentSpace_167	31432	Caudoputamen	caudate nucleus	0.834089845712618
LatentSpace_167	31433	Caudoputamen	caudate nucleus	0.889956282158165
LatentSpace_167	31434	Caudoputamen	caudate nucleus	0.917787848800589
LatentSpace_167	31435	Caudoputamen	caudate nucleus	0.933258999955155
LatentSpace_167	31436	Caudoputamen	caudate nucleus	0.954003356194058
LatentSpace_167	31437	Caudoputamen	caudate nucleus	0.966051769313795
LatentSpace_167	31438	Caudoputamen	caudate nucleus	0.969241031825552
LatentSpace_167	31439	Caudoputamen	caudate nucleus	0.972103858608508
LatentSpace_167	31440	Caudoputamen	caudate nucleus	0.95821163117576
LatentSpace_167	31441	Lateral septal complex	septal nuclei	0.860038380839638
LatentSpace_167	31442	Lateral septal complex	septal nuclei	0.867484329282128
LatentSpace_167	31443	Lateral septal complex	septal nuclei	0.86803242324917
LatentSpace_167	31444	Caudoputamen	caudate nucleus	0.953351814880079
LatentSpace_167	31445	Caudoputamen	caudate nucleus	0.971029926609953
LatentSpace_167	31446	Caudoputamen	caudate nucleus	0.972384638893223
LatentSpace_167	31447	Caudoputamen	caudate nucleus	0.967305926906341
LatentSpace_167	31448	Caudoputamen	caudate nucleus	0.960235007415962
LatentSpace_167	31449	Caudoputamen	caudate nucleus	0.956641774194185
LatentSpace_167	31450	Caudoputamen	caudate nucleus	0.946286644687345
LatentSpace_167	31451	Caudoputamen	caudate nucleus	0.917712578161818
LatentSpace_167	31452	Caudoputamen	caudate nucleus	0.833969211136514
LatentSpace_167	31469	Caudoputamen	caudate nucleus	0.874818559590811
LatentSpace_167	31470	Caudoputamen	caudate nucleus	0.929644142534087
LatentSpace_167	31471	Caudoputamen	caudate nucleus	0.947332174467533
LatentSpace_167	31472	Caudoputamen	caudate nucleus	0.962738341507438
LatentSpace_167	31473	Caudoputamen	caudate nucleus	0.971671521907718
LatentSpace_167	31474	Caudoputamen	caudate nucleus	0.970879629663424
LatentSpace_167	31475	Caudoputamen	caudate nucleus	0.969510423518187
LatentSpace_167	31476	Caudoputamen	caudate nucleus	0.947339382467421
LatentSpace_167	31477	Caudoputamen	caudate nucleus	0.946209585835882
LatentSpace_167	31478	Caudoputamen	caudate nucleus	0.964292162661499
LatentSpace_167	31479	Caudoputamen	caudate nucleus	0.972049631735354
LatentSpace_167	31480	Caudoputamen	caudate nucleus	0.971383828870135
LatentSpace_167	31481	Caudoputamen	caudate nucleus	0.967439333377589
LatentSpace_167	31482	Caudoputamen	caudate nucleus	0.962455642806941
LatentSpace_167	31483	Caudoputamen	caudate nucleus	0.938511812910559
LatentSpace_167	31484	Caudoputamen	caudate nucleus	0.851354691946583
LatentSpace_167	31501	Caudoputamen	caudate nucleus	0.858119643545083
LatentSpace_167	31502	Caudoputamen	caudate nucleus	0.918902878558742
LatentSpace_167	31503	Caudoputamen	caudate nucleus	0.948800230644204
LatentSpace_167	31504	Caudoputamen	caudate nucleus	0.96282889638086
LatentSpace_167	31505	Caudoputamen	caudate nucleus	0.964288796342436
LatentSpace_167	31508	Caudoputamen	caudate nucleus	0.954069304444633
LatentSpace_167	31509	Caudoputamen	caudate nucleus	0.954412621965439
LatentSpace_167	31510	Caudoputamen	caudate nucleus	0.944380347786154
LatentSpace_167	31511	Caudoputamen	caudate nucleus	0.911469231008469
LatentSpace_167	32889	Caudoputamen	caudate nucleus	0.834717226008472
LatentSpace_167	32909	Caudoputamen	caudate nucleus	0.818010594770765
LatentSpace_167	32923	Caudoputamen	putamen	0.884077878803399
LatentSpace_167	32942	Caudoputamen	caudate nucleus	0.877034157425637
LatentSpace_167	32957	Caudoputamen	caudate nucleus	0.853717785016983
LatentSpace_167	32958	Caudoputamen	putamen	0.908661754164376
LatentSpace_167	32975	Caudoputamen	caudate nucleus	0.910240832832618
LatentSpace_167	32976	Caudoputamen	caudate nucleus	0.842895495879164
LatentSpace_167	32989	Caudoputamen	caudate nucleus	0.75880413404923
LatentSpace_167	32990	Caudoputamen	caudate nucleus	0.878897092839933
LatentSpace_167	32991	Caudoputamen	putamen	0.908926371435615
LatentSpace_167	33006	Caudoputamen	putamen	0.924771182969539
LatentSpace_167	33007	Caudoputamen	caudate nucleus	0.894640185205348
LatentSpace_167	33008	Caudoputamen	caudate nucleus	0.76267320634713
LatentSpace_167	33022	Caudoputamen	caudate nucleus	0.851694363047652
LatentSpace_167	33023	Caudoputamen	caudate nucleus	0.901723845156791
LatentSpace_167	33024	Caudoputamen	putamen	0.91732570417422
LatentSpace_167	33031	Caudoputamen	putamen	0.932657426862707
LatentSpace_167	33032	Caudoputamen	caudate nucleus	0.912872055174373
LatentSpace_167	33033	Caudoputamen	caudate nucleus	0.863555658867954
LatentSpace_167	33034	Caudoputamen	caudate nucleus	0.696120572509559
LatentSpace_167	33049	Caudoputamen	caudate nucleus	0.838832740672766
LatentSpace_167	33050	Caudoputamen	caudate nucleus	0.899261830065317
LatentSpace_167	33051	Caudoputamen	caudate nucleus	0.917784329455358
LatentSpace_167	33052	Caudoputamen	caudate nucleus	0.928524260260737
LatentSpace_167	33055	Caudoputamen	putamen	0.912421388369815
LatentSpace_167	33056	Caudoputamen	putamen	0.942085070509125
LatentSpace_167	33057	Caudoputamen	caudate nucleus	0.94292464110786
LatentSpace_167	33058	Caudoputamen	caudate nucleus	0.931364223346442
LatentSpace_167	33059	Caudoputamen	caudate nucleus	0.908857258642
LatentSpace_167	33060	Caudoputamen	caudate nucleus	0.859115573327537
LatentSpace_167	33075	Caudoputamen	caudate nucleus	0.816881751816508
LatentSpace_167	33076	Caudoputamen	caudate nucleus	0.898425354988706
LatentSpace_167	33077	Caudoputamen	caudate nucleus	0.91983548164481
LatentSpace_167	33078	Caudoputamen	caudate nucleus	0.934868284816206
LatentSpace_167	33079	Caudoputamen	caudate nucleus	0.942071603163936
LatentSpace_167	33080	Caudoputamen	putamen	0.923880105193329
LatentSpace_167	33081	Caudoputamen	putamen	0.933735646715092
LatentSpace_167	33082	Caudoputamen	putamen	0.95023207933134
LatentSpace_167	33083	Caudoputamen	caudate nucleus	0.951803937757609
LatentSpace_167	33084	Caudoputamen	caudate nucleus	0.943182501271448
LatentSpace_167	33085	Caudoputamen	caudate nucleus	0.925328925615427
LatentSpace_167	33086	Caudoputamen	caudate nucleus	0.895490736085267
LatentSpace_167	33087	Caudoputamen	caudate nucleus	0.823212543751259
LatentSpace_167	33103	Caudoputamen	caudate nucleus	0.884678182376198
LatentSpace_167	33104	Caudoputamen	caudate nucleus	0.905678572728129
LatentSpace_167	33105	Caudoputamen	caudate nucleus	0.917033596036245
LatentSpace_167	33106	Caudoputamen	caudate nucleus	0.932955600470952
LatentSpace_167	33107	Caudoputamen	caudate nucleus	0.946399926130679
LatentSpace_167	33108	Caudoputamen	caudate nucleus	0.950738051203698
LatentSpace_167	33109	Caudoputamen	putamen	0.946507303738486
LatentSpace_167	33110	Caudoputamen	putamen	0.944404029903018
LatentSpace_167	33111	Caudoputamen	caudate nucleus	0.950132077617475
LatentSpace_167	33112	Caudoputamen	caudate nucleus	0.950431151930051
LatentSpace_167	33113	Caudoputamen	caudate nucleus	0.94889824592708
LatentSpace_167	33114	Caudoputamen	caudate nucleus	0.934845786572938
LatentSpace_167	33115	Caudoputamen	caudate nucleus	0.910119412327214
LatentSpace_167	33116	Caudoputamen	caudate nucleus	0.864043560410426
LatentSpace_167	33131	Caudoputamen	caudate nucleus	0.841973596439747
LatentSpace_167	33132	Caudoputamen	caudate nucleus	0.892978632291593
LatentSpace_167	33133	Caudoputamen	caudate nucleus	0.906114086429111
LatentSpace_167	33134	Caudoputamen	caudate nucleus	0.91991097269008
LatentSpace_167	33135	Caudoputamen	caudate nucleus	0.932840222801339
LatentSpace_167	33136	Caudoputamen	caudate nucleus	0.9454485686423
LatentSpace_167	33137	Caudoputamen	caudate nucleus	0.951008157010353
LatentSpace_167	33138	Caudoputamen	putamen	0.95423284337814
LatentSpace_167	33139	Caudoputamen	putamen	0.929329133791419
LatentSpace_167	33140	Lateral septal complex	septal nuclei	0.874300122454156
LatentSpace_167	33141	Lateral septal complex	septal nuclei	0.859694708211746
LatentSpace_167	33142	Caudoputamen	putamen	0.949765769635569
LatentSpace_167	33143	Caudoputamen	putamen	0.954919688637453
LatentSpace_167	33144	Caudoputamen	caudate nucleus	0.951825291667785
LatentSpace_167	33145	Caudoputamen	caudate nucleus	0.948868744098962
LatentSpace_167	33146	Caudoputamen	caudate nucleus	0.946176895944795
LatentSpace_167	33147	Caudoputamen	caudate nucleus	0.941408962961906
LatentSpace_167	33148	Caudoputamen	caudate nucleus	0.929491761030113
LatentSpace_167	33149	Caudoputamen	caudate nucleus	0.895984242384326
LatentSpace_167	33150	Caudoputamen	caudate nucleus	0.800782012859091
LatentSpace_167	33166	Caudoputamen	caudate nucleus	0.790721491297305
LatentSpace_167	33167	Caudoputamen	caudate nucleus	0.87947360530569
LatentSpace_167	33168	Caudoputamen	caudate nucleus	0.890146542396519
LatentSpace_167	33169	Caudoputamen	caudate nucleus	0.903548642550522
LatentSpace_167	33170	Caudoputamen	caudate nucleus	0.918422416375296
LatentSpace_167	33171	Caudoputamen	caudate nucleus	0.929121190285335
LatentSpace_167	33172	Caudoputamen	caudate nucleus	0.94106418969088
LatentSpace_167	33173	Caudoputamen	caudate nucleus	0.95505275714148
LatentSpace_167	33174	Caudoputamen	caudate nucleus	0.95908551126706
LatentSpace_167	33175	Lateral septal complex	septal nuclei	0.882867991981098
LatentSpace_167	33176	Lateral septal complex	septal nuclei	0.874150343771573
LatentSpace_167	33177	Lateral septal complex	septal nuclei	0.858458612375105
LatentSpace_167	33178	Lateral septal complex	septal nuclei	0.863991728828741
LatentSpace_167	33179	Lateral septal complex	septal nuclei	0.870601304646504
LatentSpace_167	33180	Caudoputamen	putamen	0.96269591056535
LatentSpace_167	33181	Caudoputamen	caudate nucleus	0.957954637947654
LatentSpace_167	33182	Caudoputamen	caudate nucleus	0.953148576908132
LatentSpace_167	33183	Caudoputamen	caudate nucleus	0.94703487327243
LatentSpace_167	33184	Caudoputamen	caudate nucleus	0.942080362397463
LatentSpace_167	33185	Caudoputamen	caudate nucleus	0.937975086443405
LatentSpace_167	33186	Caudoputamen	caudate nucleus	0.925775784806738
LatentSpace_167	33187	Caudoputamen	caudate nucleus	0.872907123207297
LatentSpace_167	33188	Caudoputamen	caudate nucleus	0.748176718386811
LatentSpace_167	33204	Caudoputamen	caudate nucleus	0.83087009624154
LatentSpace_167	33205	Caudoputamen	caudate nucleus	0.876667504889269
LatentSpace_167	33206	Caudoputamen	caudate nucleus	0.896899306174038
LatentSpace_167	33207	Caudoputamen	caudate nucleus	0.908751173812468
LatentSpace_167	33208	Caudoputamen	caudate nucleus	0.922191229973608
LatentSpace_167	33209	Caudoputamen	caudate nucleus	0.939825521423948
LatentSpace_167	33210	Caudoputamen	caudate nucleus	0.95683975407295
LatentSpace_167	33211	Caudoputamen	caudate nucleus	0.971614278426301
LatentSpace_167	33212	Caudoputamen	caudate nucleus	0.952614369118505
LatentSpace_167	33213	Lateral septal complex	septal nuclei	0.865708119334997
LatentSpace_167	33214	Lateral septal complex	septal nuclei	0.864129505813579
LatentSpace_167	33215	Lateral septal complex	septal nuclei	0.85217489083958
LatentSpace_167	33216	Lateral septal complex	septal nuclei	0.851756799450395
LatentSpace_167	33217	Lateral septal complex	septal nuclei	0.856294269586986
LatentSpace_167	33218	Lateral septal complex	septal nuclei	0.859168892030631
LatentSpace_167	33219	Lateral septal complex	septal nuclei	0.857780017101348
LatentSpace_167	33220	Lateral septal complex	septal nuclei	0.85132014263765
LatentSpace_167	33221	Caudoputamen	putamen	0.942549394056283
LatentSpace_167	33222	Caudoputamen	caudate nucleus	0.960071972198716
LatentSpace_167	33223	Caudoputamen	caudate nucleus	0.957734159541691
LatentSpace_167	33224	Caudoputamen	caudate nucleus	0.952939624180051
LatentSpace_167	33225	Caudoputamen	caudate nucleus	0.943831120233341
LatentSpace_167	33226	Caudoputamen	caudate nucleus	0.935210031237256
LatentSpace_167	33227	Caudoputamen	caudate nucleus	0.931109317457271
LatentSpace_167	33228	Caudoputamen	caudate nucleus	0.909383740120028
LatentSpace_167	33229	Caudoputamen	caudate nucleus	0.826165943033146
LatentSpace_167	33245	Caudoputamen	caudate nucleus	0.862082949415426
LatentSpace_167	33246	Caudoputamen	caudate nucleus	0.902905005912175
LatentSpace_167	33247	Caudoputamen	caudate nucleus	0.912472733264243
LatentSpace_167	33248	Caudoputamen	caudate nucleus	0.92345924489519
LatentSpace_167	33249	Caudoputamen	caudate nucleus	0.942242529973038
LatentSpace_167	33250	Caudoputamen	caudate nucleus	0.953184197990087
LatentSpace_167	33251	Caudoputamen	caudate nucleus	0.969079816429734
LatentSpace_167	33252	Caudoputamen	caudate nucleus	0.965867570534319
LatentSpace_167	33253	Caudoputamen	nucleus accumbens	0.909987825202231
LatentSpace_167	33254	Lateral septal complex	septal nuclei	0.847602702661371
LatentSpace_167	33255	Lateral septal complex	septal nuclei	0.846212771858393
LatentSpace_167	33256	Lateral septal complex	septal nuclei	0.845604791826205
LatentSpace_167	33257	Lateral septal complex	septal nuclei	0.847964836973331
LatentSpace_167	33258	Lateral septal complex	septal nuclei	0.852297196695833
LatentSpace_167	33259	Lateral septal complex	septal nuclei	0.847621393753556
LatentSpace_167	33260	Caudoputamen	caudate nucleus	0.958449059798157
LatentSpace_167	33261	Caudoputamen	caudate nucleus	0.96051335471752
LatentSpace_167	33262	Caudoputamen	caudate nucleus	0.951069505124001
LatentSpace_167	33263	Caudoputamen	caudate nucleus	0.940598180756137
LatentSpace_167	33264	Caudoputamen	caudate nucleus	0.933858042101726
LatentSpace_167	33265	Caudoputamen	caudate nucleus	0.922718817020666
LatentSpace_167	33266	Caudoputamen	caudate nucleus	0.910274912603043
LatentSpace_167	33267	Caudoputamen	caudate nucleus	0.860756478667165
LatentSpace_167	33283	Caudoputamen	caudate nucleus	0.793422855787338
LatentSpace_167	33284	Caudoputamen	caudate nucleus	0.874174426499281
LatentSpace_167	33285	Caudoputamen	caudate nucleus	0.901066471242465
LatentSpace_167	33286	Caudoputamen	caudate nucleus	0.922532804569888
LatentSpace_167	33287	Caudoputamen	caudate nucleus	0.94717378492635
LatentSpace_167	33288	Caudoputamen	caudate nucleus	0.957740128820602
LatentSpace_167	33289	Caudoputamen	caudate nucleus	0.964804564706453
LatentSpace_167	33290	Caudoputamen	caudate nucleus	0.966049787593711
LatentSpace_167	33291	Lateral septal complex	septal nuclei	0.816230057131536
LatentSpace_167	33292	Lateral septal complex	septal nuclei	0.825911371221858
LatentSpace_167	33293	Lateral septal complex	septal nuclei	0.828254641360466
LatentSpace_167	33294	Lateral septal complex	septal nuclei	0.827142120183525
LatentSpace_167	33295	Caudoputamen	caudate nucleus	0.962485713309868
LatentSpace_167	33296	Caudoputamen	caudate nucleus	0.96321816556606
LatentSpace_167	33297	Caudoputamen	caudate nucleus	0.950764247995665
LatentSpace_167	33298	Caudoputamen	caudate nucleus	0.936055009142407
LatentSpace_167	33299	Caudoputamen	caudate nucleus	0.927986745421832
LatentSpace_167	33300	Caudoputamen	caudate nucleus	0.909330024547969
LatentSpace_167	33301	Caudoputamen	caudate nucleus	0.868202341536959
LatentSpace_167	33317	Caudoputamen	caudate nucleus	0.899739560895838
LatentSpace_167	33318	Caudoputamen	caudate nucleus	0.93258528738478
LatentSpace_167	33319	Caudoputamen	caudate nucleus	0.953756208088665
LatentSpace_167	33320	Caudoputamen	caudate nucleus	0.963076229188149
LatentSpace_167	33321	Caudoputamen	caudate nucleus	0.964368636941029
LatentSpace_167	33322	Caudoputamen	caudate nucleus	0.963893172526141
LatentSpace_167	33323	Caudoputamen	caudate nucleus	0.962543694991522
LatentSpace_167	33324	Caudoputamen	caudate nucleus	0.96846223451129
LatentSpace_167	33325	Caudoputamen	caudate nucleus	0.963891349991125
LatentSpace_167	33326	Caudoputamen	caudate nucleus	0.956424740437891
LatentSpace_167	33327	Caudoputamen	caudate nucleus	0.942591644790208
LatentSpace_167	33328	Caudoputamen	caudate nucleus	0.913481559515242
LatentSpace_167	33345	Caudoputamen	caudate nucleus	0.956690550715879
LatentSpace_167	33346	Caudoputamen	caudate nucleus	0.971065806473783
LatentSpace_167	33347	Caudoputamen	caudate nucleus	0.947358714724217
LatentSpace_167	33348	Caudoputamen	caudate nucleus	0.960903925983562
LatentSpace_167	33349	Caudoputamen	caudate nucleus	0.961117418426453
LatentSpace_167	33350	Caudoputamen	caudate nucleus	0.953082902573306
LatentSpace_167	34767	Caudoputamen	CA3 field	0.81820806020252
LatentSpace_167	34805	Caudoputamen	caudate nucleus	0.827170666743024
LatentSpace_167	34820	Caudoputamen	caudate nucleus	0.832149996514272
LatentSpace_167	34821	Caudoputamen	putamen	0.87753594873301
LatentSpace_167	34842	Caudoputamen	putamen	0.857760882928524
LatentSpace_167	34843	Caudoputamen	putamen	0.881474942546808
LatentSpace_167	34858	Caudoputamen	putamen	0.883144764086843
LatentSpace_167	34877	Caudoputamen	putamen	0.866756567370885
LatentSpace_167	34878	Caudoputamen	putamen	0.902316662275408
LatentSpace_167	34879	Caudoputamen	caudate nucleus	0.87248084088484
LatentSpace_167	34894	Caudoputamen	caudate nucleus	0.813512042273501
LatentSpace_167	34895	Caudoputamen	putamen	0.889238372069718
LatentSpace_167	34907	Caudoputamen	putamen	0.913196769578327
LatentSpace_167	34908	Caudoputamen	caudate nucleus	0.900355171868039
LatentSpace_167	34909	Caudoputamen	caudate nucleus	0.813841511547321
LatentSpace_167	34924	Caudoputamen	caudate nucleus	0.75439155928161
LatentSpace_167	34925	Caudoputamen	caudate nucleus	0.870307219430563
LatentSpace_167	34926	Caudoputamen	putamen	0.907372632800604
LatentSpace_167	34927	Caudoputamen	putamen	0.915935391196451
LatentSpace_167	34934	Caudoputamen	putamen	0.922391901779552
LatentSpace_167	34935	Caudoputamen	caudate nucleus	0.920871890909052
LatentSpace_167	34936	Caudoputamen	caudate nucleus	0.881800911269261
LatentSpace_167	34952	Caudoputamen	caudate nucleus	0.852226014415438
LatentSpace_167	34953	Caudoputamen	caudate nucleus	0.903442549257946
LatentSpace_167	34954	Caudoputamen	caudate nucleus	0.925061119542949
LatentSpace_167	34955	Caudoputamen	putamen	0.932761900385863
LatentSpace_167	34960	Caudoputamen	putamen	0.92868793755011
LatentSpace_167	34961	Caudoputamen	putamen	0.940706228886295
LatentSpace_167	34962	Caudoputamen	caudate nucleus	0.936470498153845
LatentSpace_167	34963	Caudoputamen	caudate nucleus	0.917319122985394
LatentSpace_167	34964	Caudoputamen	caudate nucleus	0.868628606849243
LatentSpace_167	34979	Caudoputamen	caudate nucleus	0.841316588293742
LatentSpace_167	34980	Caudoputamen	caudate nucleus	0.901472964676774
LatentSpace_167	34981	Caudoputamen	caudate nucleus	0.929709015766128
LatentSpace_167	34982	Caudoputamen	caudate nucleus	0.940892887270369
LatentSpace_167	34983	Caudoputamen	putamen	0.943076996067066
LatentSpace_167	34984	Caudoputamen	putamen	0.934388898400783
LatentSpace_167	34985	Caudoputamen	putamen	0.944545313134839
LatentSpace_167	34986	Caudoputamen	putamen	0.951205997669813
LatentSpace_167	34987	Caudoputamen	caudate nucleus	0.945847151300863
LatentSpace_167	34988	Caudoputamen	caudate nucleus	0.929070167813058
LatentSpace_167	34989	Caudoputamen	caudate nucleus	0.898249987816655
LatentSpace_167	34990	Caudoputamen	caudate nucleus	0.821516783323024
LatentSpace_167	35005	Caudoputamen	caudate nucleus	0.881536869168007
LatentSpace_167	35006	Caudoputamen	caudate nucleus	0.913231978122937
LatentSpace_167	35007	Caudoputamen	caudate nucleus	0.932406413881511
LatentSpace_167	35008	Caudoputamen	caudate nucleus	0.944673859835273
LatentSpace_167	35009	Caudoputamen	caudate nucleus	0.951482838979818
LatentSpace_167	35010	Caudoputamen	putamen	0.949912571051527
LatentSpace_167	35011	Lateral septal complex	septal nuclei	0.800443387804868
LatentSpace_167	35012	Lateral septal complex	septal nuclei	0.825558455983573
LatentSpace_167	35013	Caudoputamen	putamen	0.949803727539448
LatentSpace_167	35014	Caudoputamen	caudate nucleus	0.951369988490494
LatentSpace_167	35015	Caudoputamen	caudate nucleus	0.948661977432013
LatentSpace_167	35016	Caudoputamen	caudate nucleus	0.944027254628439
LatentSpace_167	35017	Caudoputamen	caudate nucleus	0.921775753499646
LatentSpace_167	35018	Caudoputamen	caudate nucleus	0.860176081137206
LatentSpace_167	35034	Caudoputamen	caudate nucleus	0.844167417406115
LatentSpace_167	35035	Caudoputamen	caudate nucleus	0.898567735140862
LatentSpace_167	35036	Caudoputamen	caudate nucleus	0.92168004970626
LatentSpace_167	35037	Caudoputamen	caudate nucleus	0.936713369097037
LatentSpace_167	35038	Caudoputamen	caudate nucleus	0.946795478405319
LatentSpace_167	35039	Caudoputamen	caudate nucleus	0.951061314809609
LatentSpace_167	35040	Caudoputamen	putamen	0.950697687781597
LatentSpace_167	35041	Lateral septal complex	septal nuclei	0.874199521131076
LatentSpace_167	35042	Lateral septal complex	septal nuclei	0.865960292225293
LatentSpace_167	35043	Lateral septal complex	septal nuclei	0.849389836469896
LatentSpace_167	35044	Lateral septal complex	septal nuclei	0.853740093399441
LatentSpace_167	35045	Lateral septal complex	septal nuclei	0.871358457742956
LatentSpace_167	35046	Caudoputamen	putamen	0.956073195765195
LatentSpace_167	35047	Caudoputamen	caudate nucleus	0.95351330598507
LatentSpace_167	35048	Caudoputamen	caudate nucleus	0.951150810251255
LatentSpace_167	35049	Caudoputamen	caudate nucleus	0.94882950526921
LatentSpace_167	35050	Caudoputamen	caudate nucleus	0.939346404355418
LatentSpace_167	35051	Caudoputamen	caudate nucleus	0.9080926760645
LatentSpace_167	35052	Caudoputamen	caudate nucleus	0.81704110371687
LatentSpace_167	35069	Caudoputamen	caudate nucleus	0.794797590206184
LatentSpace_167	35070	Caudoputamen	caudate nucleus	0.858790137322459
LatentSpace_167	35071	Caudoputamen	caudate nucleus	0.896284731504965
LatentSpace_167	35072	Caudoputamen	caudate nucleus	0.919445684346432
LatentSpace_167	35073	Caudoputamen	caudate nucleus	0.936999498044847
LatentSpace_167	35074	Caudoputamen	caudate nucleus	0.947270524488052
LatentSpace_167	35075	Caudoputamen	caudate nucleus	0.955198802656358
LatentSpace_167	35076	Caudoputamen	putamen	0.954303249742802
LatentSpace_167	35077	Lateral septal complex	septal nuclei	0.874949284852969
LatentSpace_167	35078	Lateral septal complex	septal nuclei	0.862582069852987
LatentSpace_167	35079	Lateral septal complex	septal nuclei	0.850050479742935
LatentSpace_167	35080	Lateral septal complex	septal nuclei	0.852733057920208
LatentSpace_167	35081	Lateral septal complex	septal nuclei	0.857917627335471
LatentSpace_167	35082	Lateral septal complex	septal nuclei	0.867320826786043
LatentSpace_167	35083	Caudoputamen	putamen	0.959855935231872
LatentSpace_167	35084	Caudoputamen	caudate nucleus	0.957662647902044
LatentSpace_167	35085	Caudoputamen	caudate nucleus	0.953470944569526
LatentSpace_167	35086	Caudoputamen	caudate nucleus	0.948503600403187
LatentSpace_167	35087	Caudoputamen	caudate nucleus	0.938939250428
LatentSpace_167	35088	Caudoputamen	caudate nucleus	0.929339113841048
LatentSpace_167	35089	Caudoputamen	caudate nucleus	0.881943962772875
LatentSpace_167	35106	Caudoputamen	caudate nucleus	0.865984795462591
LatentSpace_167	35107	Caudoputamen	caudate nucleus	0.902489933494014
LatentSpace_167	35108	Caudoputamen	caudate nucleus	0.92620299355547
LatentSpace_167	35109	Caudoputamen	caudate nucleus	0.944892166691836
LatentSpace_167	35110	Caudoputamen	caudate nucleus	0.959247241709227
LatentSpace_167	35111	Caudoputamen	caudate nucleus	0.9708311929392
LatentSpace_167	35112	Caudoputamen	putamen	0.944253326311055
LatentSpace_167	35113	Lateral septal complex	septal nuclei	0.829212357318581
LatentSpace_167	35114	Lateral septal complex	septal nuclei	0.821126488243388
LatentSpace_167	35115	Lateral septal complex	nucleus accumbens	0.821557369160088
LatentSpace_167	35116	Lateral septal complex	septal nuclei	0.830530211472491
LatentSpace_167	35117	Lateral septal complex	septal nuclei	0.832852510490693
LatentSpace_167	35118	Lateral septal complex	septal nuclei	0.83804522886821
LatentSpace_167	35119	Caudoputamen	putamen	0.935741234108104
LatentSpace_167	35120	Caudoputamen	putamen	0.955393379489938
LatentSpace_167	35121	Caudoputamen	caudate nucleus	0.956920542353121
LatentSpace_167	35122	Caudoputamen	caudate nucleus	0.952379524890098
LatentSpace_167	35123	Caudoputamen	caudate nucleus	0.941622765633744
LatentSpace_167	35124	Caudoputamen	caudate nucleus	0.925456718851836
LatentSpace_167	35125	Caudoputamen	caudate nucleus	0.899084972381042
LatentSpace_167	35143	Caudoputamen	caudate nucleus	0.842015193161694
LatentSpace_167	35144	Caudoputamen	caudate nucleus	0.890332841658399
LatentSpace_167	35145	Caudoputamen	caudate nucleus	0.920274687477446
LatentSpace_167	35146	Caudoputamen	caudate nucleus	0.944065660436638
LatentSpace_167	35147	Caudoputamen	caudate nucleus	0.956070924816877
LatentSpace_167	35148	Caudoputamen	caudate nucleus	0.968082269724769
LatentSpace_167	35149	Caudoputamen	putamen	0.95576703636769
LatentSpace_167	35150	Lateral septal complex	amygdala	0.770244960240478
LatentSpace_167	35151	Lateral septal complex	septal nuclei	0.776444200486647
LatentSpace_167	35152	Lateral septal complex	septal nuclei	0.775892227477406
LatentSpace_167	35153	Lateral septal complex	septal nuclei	0.774697019031151
LatentSpace_167	35154	Caudoputamen	putamen	0.94698443348718
LatentSpace_167	35155	Caudoputamen	putamen	0.952955090687806
LatentSpace_167	35156	Caudoputamen	caudate nucleus	0.94446029720157
LatentSpace_167	35157	Caudoputamen	caudate nucleus	0.930839549434273
LatentSpace_167	35158	Caudoputamen	caudate nucleus	0.918387461236323
LatentSpace_167	35159	Caudoputamen	caudate nucleus	0.894647357613328
LatentSpace_167	35160	Caudoputamen	caudate nucleus	0.83552615565448
LatentSpace_167	35179	Caudoputamen	caudate nucleus	0.851336787732218
LatentSpace_167	35180	Caudoputamen	caudate nucleus	0.906913604829634
LatentSpace_167	35181	Caudoputamen	caudate nucleus	0.940385543504108
LatentSpace_167	35182	Caudoputamen	caudate nucleus	0.952407695633344
LatentSpace_167	35183	Caudoputamen	caudate nucleus	0.958066812938511
LatentSpace_167	35184	Caudoputamen	caudate nucleus	0.953602970237651
LatentSpace_167	35185	Caudoputamen	putamen	0.946752905058747
LatentSpace_167	35186	Caudoputamen	caudate nucleus	0.952101184109172
LatentSpace_167	35187	Caudoputamen	caudate nucleus	0.939881729104872
LatentSpace_167	35188	Caudoputamen	caudate nucleus	0.921283714387416
LatentSpace_167	35189	Caudoputamen	caudate nucleus	0.89694579557917
LatentSpace_167	35209	Caudoputamen	caudate nucleus	0.954699583541904
LatentSpace_167	35210	Caudoputamen	caudate nucleus	0.946283533477386
LatentSpace_167	35211	Caudoputamen	caudate nucleus	0.925434744516253
LatentSpace_167	36666	Caudoputamen	caudate nucleus	0.758903680390317
LatentSpace_167	36681	Caudoputamen	caudate nucleus	0.784240793910069
LatentSpace_167	36701	Caudoputamen	caudate nucleus	0.824847733673484
LatentSpace_167	36716	Caudoputamen	putamen	0.856348185088659
LatentSpace_167	36729	Caudoputamen	putamen	0.851701348160256
LatentSpace_167	36730	Caudoputamen	putamen	0.868097326004373
LatentSpace_167	36746	Caudoputamen	caudate nucleus	0.835009912999582
LatentSpace_167	36747	Caudoputamen	putamen	0.880981446954989
LatentSpace_167	36758	Caudoputamen	putamen	0.884361050899098
LatentSpace_167	36759	Caudoputamen	caudate nucleus	0.822592635170091
LatentSpace_167	36776	Caudoputamen	caudate nucleus	0.880973199992356
LatentSpace_167	36777	Caudoputamen	putamen	0.906635199905678
LatentSpace_167	36787	Caudoputamen	putamen	0.907755820679644
LatentSpace_167	36788	Caudoputamen	caudate nucleus	0.888852670716137
LatentSpace_167	36804	Caudoputamen	caudate nucleus	0.86292586981277
LatentSpace_167	36805	Caudoputamen	caudate nucleus	0.914865160397242
LatentSpace_167	36806	Caudoputamen	putamen	0.930518796576115
LatentSpace_167	36809	Caudoputamen	putamen	0.932467394159372
LatentSpace_167	36810	Caudoputamen	caudate nucleus	0.920295340318728
LatentSpace_167	36811	Caudoputamen	caudate nucleus	0.86331790807031
LatentSpace_167	36827	Caudoputamen	caudate nucleus	0.913840322923257
LatentSpace_167	36828	Caudoputamen	caudate nucleus	0.93462241093891
LatentSpace_167	36829	Caudoputamen	putamen	0.940803920267449
LatentSpace_167	36830	Caudoputamen	putamen	0.943064289772656
LatentSpace_167	36831	Caudoputamen	caudate nucleus	0.947734256001177
LatentSpace_167	36832	Caudoputamen	caudate nucleus	0.937943410100861
LatentSpace_167	36833	Caudoputamen	caudate nucleus	0.901178189502982
LatentSpace_167	36850	Caudoputamen	caudate nucleus	0.887733085539518
LatentSpace_167	36851	Caudoputamen	caudate nucleus	0.921307835552218
LatentSpace_167	36852	Caudoputamen	caudate nucleus	0.938970407893971
LatentSpace_167	36853	Caudoputamen	putamen	0.948952852946959
LatentSpace_167	36854	Caudoputamen	putamen	0.947956344335277
LatentSpace_167	36855	Lateral septal complex	septal nuclei	0.795800547980725
LatentSpace_167	36856	Lateral septal complex	nucleus accumbens	0.81129861855591
LatentSpace_167	36857	Lateral septal complex	septal nuclei	0.820643056732668
LatentSpace_167	36858	Lateral septal complex	septal nuclei	0.849574169643025
LatentSpace_167	36859	Caudoputamen	putamen	0.94981906622331
LatentSpace_167	36860	Caudoputamen	caudate nucleus	0.950825145493771
LatentSpace_167	36861	Caudoputamen	caudate nucleus	0.94608586628974
LatentSpace_167	36862	Caudoputamen	caudate nucleus	0.928518097820682
LatentSpace_167	36863	Caudoputamen	caudate nucleus	0.865472628916177
LatentSpace_167	36879	Caudoputamen	caudate nucleus	0.845266248926133
LatentSpace_167	36880	Caudoputamen	caudate nucleus	0.905811525522205
LatentSpace_167	36881	Caudoputamen	caudate nucleus	0.932026384494714
LatentSpace_167	36882	Caudoputamen	caudate nucleus	0.942242883255132
LatentSpace_167	36883	Caudoputamen	putamen	0.947914563325885
LatentSpace_167	36884	Caudoputamen	putamen	0.945875933530128
LatentSpace_167	36885	Lateral septal complex	septal nuclei	0.827772141029322
LatentSpace_167	36886	Lateral septal complex	septal nuclei	0.826899813791474
LatentSpace_167	36887	Lateral septal complex	septal nuclei	0.833288889192267
LatentSpace_167	36888	Lateral septal complex	septal nuclei	0.835523398622154
LatentSpace_167	36889	Caudoputamen	putamen	0.953164822184434
LatentSpace_167	36890	Caudoputamen	caudate nucleus	0.951734577507652
LatentSpace_167	36891	Caudoputamen	caudate nucleus	0.948872616857635
LatentSpace_167	36892	Caudoputamen	caudate nucleus	0.93687619946916
LatentSpace_167	36893	Caudoputamen	caudate nucleus	0.89713646293373
LatentSpace_167	36910	Caudoputamen	caudate nucleus	0.901097380457064
LatentSpace_167	36911	Caudoputamen	caudate nucleus	0.930643308715889
LatentSpace_167	36912	Caudoputamen	caudate nucleus	0.945674014213916
LatentSpace_167	36913	Caudoputamen	caudate nucleus	0.95289082312345
LatentSpace_167	36914	Caudoputamen	putamen	0.946014902556837
LatentSpace_167	36915	Lateral septal complex	septal nuclei	0.806919448447941
LatentSpace_167	36916	Lateral septal complex	amygdala	0.805353428552419
LatentSpace_167	36917	Lateral septal complex	amygdala	0.805585773914023
LatentSpace_167	36918	Lateral septal complex	septal nuclei	0.807608645550328
LatentSpace_167	36919	Caudoputamen	putamen	0.947700644848949
LatentSpace_167	36920	Caudoputamen	putamen	0.949865223655168
LatentSpace_167	36921	Caudoputamen	caudate nucleus	0.948359749272175
LatentSpace_167	36922	Caudoputamen	caudate nucleus	0.938869174954007
LatentSpace_167	36923	Caudoputamen	caudate nucleus	0.91228448255621
LatentSpace_167	36924	Caudoputamen	caudate nucleus	0.847008417874005
LatentSpace_167	36943	Caudoputamen	caudate nucleus	0.860920817091771
LatentSpace_167	36944	Caudoputamen	caudate nucleus	0.915184704422033
LatentSpace_167	36945	Caudoputamen	caudate nucleus	0.944519513842071
LatentSpace_167	36946	Caudoputamen	caudate nucleus	0.957709234526743
LatentSpace_167	36947	Caudoputamen	caudate nucleus	0.962807555474282
LatentSpace_167	36948	Lateral septal complex	paraterminal gyrus	0.810237854776635
LatentSpace_167	36949	Lateral septal complex	paraterminal gyrus	0.801595280298616
LatentSpace_167	36950	Caudoputamen	putamen	0.940375217936078
LatentSpace_167	36951	Caudoputamen	caudate nucleus	0.944288577658688
LatentSpace_167	36952	Caudoputamen	caudate nucleus	0.935277895502271
LatentSpace_167	36953	Caudoputamen	caudate nucleus	0.911711360697501
LatentSpace_167	36954	Caudoputamen	caudate nucleus	0.85072699472594
LatentSpace_167	36973	Caudoputamen	caudate nucleus	0.884941182825414
LatentSpace_167	36974	Caudoputamen	caudate nucleus	0.926440544339871
LatentSpace_167	36975	Caudoputamen	caudate nucleus	0.947504721736317
LatentSpace_167	36976	Caudoputamen	caudate nucleus	0.959557840589632
LatentSpace_167	36977	Caudoputamen	putamen	0.935704735331007
LatentSpace_167	36978	Caudoputamen	caudate nucleus	0.921596745628757
LatentSpace_167	36979	Caudoputamen	caudate nucleus	0.887195634561467
LatentSpace_167	38609	Caudoputamen	putamen	0.868895290552745
LatentSpace_167	38621	Caudoputamen	putamen	0.8569606137418
LatentSpace_167	38639	Caudoputamen	putamen	0.908541633522944
LatentSpace_167	38640	Caudoputamen	putamen	0.843466958607026
LatentSpace_167	38644	Caudoputamen	putamen	0.905737200588228
LatentSpace_167	38662	Caudoputamen	caudate nucleus	0.905885865611234
LatentSpace_167	38663	Caudoputamen	putamen	0.93348121198101
LatentSpace_167	38664	Caudoputamen	caudate nucleus	0.92569122158519
LatentSpace_167	38683	Caudoputamen	caudate nucleus	0.913727238622504
LatentSpace_167	38684	Caudoputamen	putamen	0.9380435346652
LatentSpace_167	38685	Lateral septal complex	nucleus accumbens	0.749870630525771
LatentSpace_167	38686	Lateral septal complex	nucleus accumbens	0.756708114062102
LatentSpace_167	38687	Lateral septal complex	nucleus accumbens	0.769646231714698
LatentSpace_167	38688	Caudoputamen	caudate nucleus	0.930516710686108
LatentSpace_167	38689	Caudoputamen	caudate nucleus	0.898899118268793
LatentSpace_167	38708	Caudoputamen	caudate nucleus	0.878217143576137
LatentSpace_167	38709	Caudoputamen	caudate nucleus	0.919509840935993
LatentSpace_167	38710	Caudoputamen	caudate nucleus	0.935024342542588
LatentSpace_167	38711	Lateral septal complex	paraterminal gyrus	0.749179642633597
LatentSpace_167	38712	Lateral septal complex	paraterminal gyrus	0.7903687826004
LatentSpace_167	38713	Lateral septal complex	paraterminal gyrus	0.76815310971386
LatentSpace_167	38714	Lateral septal complex	paraterminal gyrus	0.751877411544358
LatentSpace_167	38734	Lateral septal complex	paraterminal gyrus	0.802295528306705
LatentSpace_167	38735	Lateral septal complex	paraterminal gyrus	0.795313492820275
LatentSpace_168	70	Olfactory tubercle	nucleus accumbens	0.848087902785213
LatentSpace_168	71	Olfactory tubercle	nucleus accumbens	0.852139901568438
LatentSpace_168	72	Olfactory tubercle	nucleus accumbens	0.871620275306604
LatentSpace_168	73	Olfactory tubercle	nucleus accumbens	0.87260149604173
LatentSpace_168	74	Olfactory tubercle	nucleus accumbens	0.859553039803764
LatentSpace_168	75	Olfactory tubercle	nucleus accumbens	0.858236174483965
LatentSpace_168	76	Olfactory tubercle	nucleus accumbens	0.86523116526386
LatentSpace_168	77	Olfactory tubercle	nucleus accumbens	0.866452746962853
LatentSpace_168	78	Olfactory tubercle	nucleus accumbens	0.855821263455146
LatentSpace_168	79	Olfactory tubercle	nucleus accumbens	0.867075640199059
LatentSpace_168	80	Olfactory tubercle	nucleus accumbens	0.878407450011646
LatentSpace_168	81	Olfactory tubercle	nucleus accumbens	0.879039436494941
LatentSpace_168	82	Olfactory tubercle	nucleus accumbens	0.863300392616221
LatentSpace_168	83	Olfactory tubercle	nucleus accumbens	0.853353460979214
LatentSpace_168	84	Olfactory tubercle	nucleus accumbens	0.863290488298569
LatentSpace_168	85	Olfactory tubercle	nucleus accumbens	0.858542980600532
LatentSpace_168	86	Olfactory tubercle	nucleus accumbens	0.842705606508137
LatentSpace_168	245	Medial amygdalar nucleus	amygdala	0.885978354848302
LatentSpace_168	296	Olfactory tubercle	amygdala	0.84139391060816
LatentSpace_168	297	Olfactory tubercle	amygdala	0.851925250597508
LatentSpace_168	298	Olfactory tubercle	amygdala	0.864866585606305
LatentSpace_168	299	Olfactory tubercle	nucleus accumbens	0.855743050355003
LatentSpace_168	300	Olfactory tubercle	nucleus accumbens	0.854644146104173
LatentSpace_168	303	Olfactory tubercle	nucleus accumbens	0.867461940048701
LatentSpace_168	304	Olfactory tubercle	nucleus accumbens	0.873177305583078
LatentSpace_168	305	Olfactory tubercle	nucleus accumbens	0.870355625146408
LatentSpace_168	306	Olfactory tubercle	nucleus accumbens	0.86620180905289
LatentSpace_168	307	Olfactory tubercle	nucleus accumbens	0.857209755933169
LatentSpace_168	308	Olfactory tubercle	amygdala	0.877777486281193
LatentSpace_168	309	Olfactory tubercle	nucleus accumbens	0.869286510588621
LatentSpace_168	310	Olfactory tubercle	nucleus accumbens	0.880627769640629
LatentSpace_168	311	Olfactory tubercle	nucleus accumbens	0.885606336246084
LatentSpace_168	312	Olfactory tubercle	nucleus accumbens	0.883380551608086
LatentSpace_168	313	Olfactory tubercle	nucleus accumbens	0.868990282091177
LatentSpace_168	314	Olfactory tubercle	nucleus accumbens	0.847443287087749
LatentSpace_168	315	Olfactory tubercle	nucleus accumbens	0.882482170248171
LatentSpace_168	316	Olfactory tubercle	nucleus accumbens	0.895511249587291
LatentSpace_168	317	Olfactory tubercle	nucleus accumbens	0.892201407092629
LatentSpace_168	318	Olfactory tubercle	nucleus accumbens	0.883390321993338
LatentSpace_168	319	Olfactory tubercle	nucleus accumbens	0.870169999587621
LatentSpace_168	320	Olfactory tubercle	amygdala	0.86759368997089
LatentSpace_168	321	Olfactory tubercle	nucleus accumbens	0.879421807323781
LatentSpace_168	322	Olfactory tubercle	nucleus accumbens	0.887505622567235
LatentSpace_168	323	Olfactory tubercle	nucleus accumbens	0.898744499732627
LatentSpace_168	324	Olfactory tubercle	nucleus accumbens	0.902557844668072
LatentSpace_168	325	Olfactory tubercle	nucleus accumbens	0.900637576562421
LatentSpace_168	326	Olfactory tubercle	nucleus accumbens	0.886166625856828
LatentSpace_168	327	Olfactory tubercle	nucleus accumbens	0.874199225719996
LatentSpace_168	328	Olfactory tubercle	nucleus accumbens	0.892821373696835
LatentSpace_168	329	Olfactory tubercle	nucleus accumbens	0.894365074467828
LatentSpace_168	330	Olfactory tubercle	nucleus accumbens	0.890920258077548
LatentSpace_168	331	Olfactory tubercle	nucleus accumbens	0.872245710072638
LatentSpace_168	332	Olfactory tubercle	nucleus accumbens	0.856595667288787
LatentSpace_168	333	Olfactory tubercle	amygdala	0.866093650124362
LatentSpace_168	334	Olfactory tubercle	nucleus accumbens	0.890255930853522
LatentSpace_168	335	Olfactory tubercle	nucleus accumbens	0.89430212243876
LatentSpace_168	336	Olfactory tubercle	nucleus accumbens	0.898953325795682
LatentSpace_168	337	Olfactory tubercle	nucleus accumbens	0.907065228116923
LatentSpace_168	338	Olfactory tubercle	nucleus accumbens	0.906933552743695
LatentSpace_168	339	Olfactory tubercle	nucleus accumbens	0.904885762624938
LatentSpace_168	340	Olfactory tubercle	nucleus accumbens	0.894754292533199
LatentSpace_168	341	Olfactory tubercle	nucleus accumbens	0.865945688423472
LatentSpace_168	342	Olfactory tubercle	nucleus accumbens	0.877007442265488
LatentSpace_168	343	Olfactory tubercle	nucleus accumbens	0.879462158356662
LatentSpace_168	344	Olfactory tubercle	nucleus accumbens	0.884990712192756
LatentSpace_168	345	Olfactory tubercle	nucleus accumbens	0.874528307485016
LatentSpace_168	346	Olfactory tubercle	nucleus accumbens	0.864866503945896
LatentSpace_168	347	Olfactory tubercle	nucleus accumbens	0.85369146780175
LatentSpace_168	348	Olfactory tubercle	nucleus accumbens	0.903691685712668
LatentSpace_168	349	Olfactory tubercle	nucleus accumbens	0.907572235548921
LatentSpace_168	350	Olfactory tubercle	nucleus accumbens	0.902220388140519
LatentSpace_168	351	Olfactory tubercle	nucleus accumbens	0.90213682462205
LatentSpace_168	352	Olfactory tubercle	nucleus accumbens	0.898480859734189
LatentSpace_168	353	Olfactory tubercle	nucleus accumbens	0.890164714317772
LatentSpace_168	354	Olfactory tubercle	nucleus accumbens	0.885681865219094
LatentSpace_168	355	Olfactory tubercle	nucleus accumbens	0.844471489843352
LatentSpace_168	356	Olfactory tubercle	nucleus accumbens	0.859660383963742
LatentSpace_168	357	Olfactory tubercle	nucleus accumbens	0.86171724312396
LatentSpace_168	358	Olfactory tubercle	nucleus accumbens	0.860906254205315
LatentSpace_168	359	Olfactory tubercle	nucleus accumbens	0.855486861645703
LatentSpace_168	360	Olfactory tubercle	nucleus accumbens	0.856677786502919
LatentSpace_168	361	Olfactory tubercle	nucleus accumbens	0.844385698058597
LatentSpace_168	362	Olfactory tubercle	nucleus accumbens	0.882625002995048
LatentSpace_168	363	Olfactory tubercle	nucleus accumbens	0.895715124433065
LatentSpace_168	364	Olfactory tubercle	nucleus accumbens	0.892651263151256
LatentSpace_168	365	Olfactory tubercle	nucleus accumbens	0.892453540449795
LatentSpace_168	366	Olfactory tubercle	nucleus accumbens	0.888905042301535
LatentSpace_168	367	Olfactory tubercle	nucleus accumbens	0.884250852258223
LatentSpace_168	368	Olfactory tubercle	nucleus accumbens	0.872942924069689
LatentSpace_168	369	Olfactory tubercle	nucleus accumbens	0.838611731790335
LatentSpace_168	370	Olfactory tubercle	nucleus accumbens	0.844165654955517
LatentSpace_168	371	Olfactory tubercle	nucleus accumbens	0.843926225167141
LatentSpace_168	372	Olfactory tubercle	nucleus accumbens	0.843681932424885
LatentSpace_168	373	Olfactory tubercle	nucleus accumbens	0.843381039669986
LatentSpace_168	374	Olfactory tubercle	nucleus accumbens	0.837622682817599
LatentSpace_168	375	Olfactory tubercle	nucleus accumbens	0.866916764799713
LatentSpace_168	376	Olfactory tubercle	nucleus accumbens	0.87474875386897
LatentSpace_168	377	Olfactory tubercle	nucleus accumbens	0.871537303175092
LatentSpace_168	378	Olfactory tubercle	nucleus accumbens	0.85724032247576
LatentSpace_168	379	Olfactory tubercle	nucleus accumbens	0.846627986865357
LatentSpace_168	380	Olfactory tubercle	nucleus accumbens	0.849469100883624
LatentSpace_168	381	Olfactory tubercle	nucleus accumbens	0.820084231061011
LatentSpace_168	711	Medial amygdalar nucleus	amygdala	0.906846965822707
LatentSpace_168	722	Medial amygdalar nucleus	amygdala	0.909649543023407
LatentSpace_168	740	Medial amygdalar nucleus	amygdala	0.891019276573773
LatentSpace_168	748	Medial amygdalar nucleus	amygdala	0.917127529580852
LatentSpace_168	766	Medial amygdalar nucleus	amygdala	0.891524125338167
LatentSpace_168	842	Olfactory tubercle	nucleus accumbens	0.834718515307964
LatentSpace_168	843	Olfactory tubercle	amygdala	0.852893804353254
LatentSpace_168	844	Olfactory tubercle	amygdala	0.868333989562854
LatentSpace_168	846	Olfactory tubercle	amygdala	0.864903154938501
LatentSpace_168	847	Olfactory tubercle	nucleus accumbens	0.863327665136699
LatentSpace_168	848	Olfactory tubercle	nucleus accumbens	0.849692835395546
LatentSpace_168	854	Olfactory tubercle	nucleus accumbens	0.841408097216293
LatentSpace_168	855	Olfactory tubercle	nucleus accumbens	0.875986655593023
LatentSpace_168	856	Olfactory tubercle	nucleus accumbens	0.885247016380736
LatentSpace_168	857	Olfactory tubercle	nucleus accumbens	0.886220827400476
LatentSpace_168	858	Olfactory tubercle	nucleus accumbens	0.884526244804395
LatentSpace_168	859	Olfactory tubercle	nucleus accumbens	0.876120539875505
LatentSpace_168	862	Olfactory tubercle	nucleus accumbens	0.894296308178635
LatentSpace_168	863	Olfactory tubercle	nucleus accumbens	0.902431187736491
LatentSpace_168	864	Olfactory tubercle	nucleus accumbens	0.898192528094226
LatentSpace_168	865	Olfactory tubercle	nucleus accumbens	0.856039655133454
LatentSpace_168	867	Olfactory tubercle	nucleus accumbens	0.85409650474187
LatentSpace_168	868	Olfactory tubercle	nucleus accumbens	0.896640674854042
LatentSpace_168	869	Olfactory tubercle	nucleus accumbens	0.909084522349411
LatentSpace_168	870	Olfactory tubercle	nucleus accumbens	0.906414473796639
LatentSpace_168	871	Olfactory tubercle	nucleus accumbens	0.898366315750035
LatentSpace_168	872	Olfactory tubercle	nucleus accumbens	0.889886864990548
LatentSpace_168	873	Olfactory tubercle	nucleus accumbens	0.876508342780917
LatentSpace_168	874	Olfactory tubercle	nucleus accumbens	0.880734435914558
LatentSpace_168	875	Olfactory tubercle	nucleus accumbens	0.892793977430164
LatentSpace_168	876	Olfactory tubercle	nucleus accumbens	0.904843935521317
LatentSpace_168	878	Olfactory tubercle	nucleus accumbens	0.923086882371253
LatentSpace_168	879	Olfactory tubercle	nucleus accumbens	0.921730371296257
LatentSpace_168	880	Olfactory tubercle	nucleus accumbens	0.893608444987381
LatentSpace_168	881	Olfactory tubercle	nucleus accumbens	0.857664982752622
LatentSpace_168	882	Olfactory tubercle	nucleus accumbens	0.901332167108621
LatentSpace_168	883	Olfactory tubercle	nucleus accumbens	0.9098371024222
LatentSpace_168	884	Olfactory tubercle	nucleus accumbens	0.914777861422104
LatentSpace_168	886	Olfactory tubercle	nucleus accumbens	0.893700537977387
LatentSpace_168	887	Olfactory tubercle	nucleus accumbens	0.875160246885892
LatentSpace_168	891	Olfactory tubercle	nucleus accumbens	0.89121172497114
LatentSpace_168	894	Olfactory tubercle	nucleus accumbens	0.919818201349483
LatentSpace_168	895	Olfactory tubercle	nucleus accumbens	0.92519947853498
LatentSpace_168	896	Olfactory tubercle	nucleus accumbens	0.923266267899622
LatentSpace_168	897	Olfactory tubercle	nucleus accumbens	0.90887206053853
LatentSpace_168	898	Olfactory tubercle	nucleus accumbens	0.857978947005733
LatentSpace_168	899	Olfactory tubercle	nucleus accumbens	0.892036973828907
LatentSpace_168	900	Olfactory tubercle	nucleus accumbens	0.905532546762886
LatentSpace_168	901	Olfactory tubercle	nucleus accumbens	0.911534721724383
LatentSpace_168	902	Olfactory tubercle	nucleus accumbens	0.914140293458464
LatentSpace_168	903	Olfactory tubercle	nucleus accumbens	0.900180918638402
LatentSpace_168	904	Olfactory tubercle	nucleus accumbens	0.876741247348828
LatentSpace_168	905	Olfactory tubercle	nucleus accumbens	0.86963332612067
LatentSpace_168	906	Olfactory tubercle	amygdala	0.860728681852929
LatentSpace_168	907	Olfactory tubercle	nucleus accumbens	0.890241869202303
LatentSpace_168	908	Olfactory tubercle	nucleus accumbens	0.896009274600569
LatentSpace_168	909	Olfactory tubercle	nucleus accumbens	0.904826046093878
LatentSpace_168	910	Olfactory tubercle	nucleus accumbens	0.915559821378307
LatentSpace_168	911	Olfactory tubercle	nucleus accumbens	0.917463444347824
LatentSpace_168	912	Olfactory tubercle	nucleus accumbens	0.916395949955205
LatentSpace_168	913	Olfactory tubercle	nucleus accumbens	0.920081061036152
LatentSpace_168	914	Olfactory tubercle	nucleus accumbens	0.91256627667309
LatentSpace_168	915	Olfactory tubercle	nucleus accumbens	0.898436416322375
LatentSpace_168	916	Olfactory tubercle	nucleus accumbens	0.885960220129149
LatentSpace_168	917	Olfactory tubercle	nucleus accumbens	0.893346472056823
LatentSpace_168	918	Olfactory tubercle	nucleus accumbens	0.903450699795773
LatentSpace_168	919	Olfactory tubercle	nucleus accumbens	0.904752120019591
LatentSpace_168	920	Olfactory tubercle	nucleus accumbens	0.895364630708187
LatentSpace_168	921	Olfactory tubercle	nucleus accumbens	0.884530655728092
LatentSpace_168	922	Olfactory tubercle	nucleus accumbens	0.8824554755424
LatentSpace_168	923	Olfactory tubercle	nucleus accumbens	0.874222635741505
LatentSpace_168	924	Olfactory tubercle	nucleus accumbens	0.886332725323728
LatentSpace_168	925	Olfactory tubercle	nucleus accumbens	0.899508288970808
LatentSpace_168	926	Olfactory tubercle	nucleus accumbens	0.907507996496454
LatentSpace_168	927	Olfactory tubercle	nucleus accumbens	0.91143295219073
LatentSpace_168	928	Olfactory tubercle	nucleus accumbens	0.908448762844286
LatentSpace_168	929	Olfactory tubercle	nucleus accumbens	0.906133112910478
LatentSpace_168	930	Olfactory tubercle	nucleus accumbens	0.902358886546882
LatentSpace_168	931	Olfactory tubercle	nucleus accumbens	0.886571031047534
LatentSpace_168	932	Olfactory tubercle	nucleus accumbens	0.877306972075576
LatentSpace_168	933	Olfactory tubercle	nucleus accumbens	0.885479538621428
LatentSpace_168	934	Olfactory tubercle	nucleus accumbens	0.88595423152408
LatentSpace_168	935	Olfactory tubercle	nucleus accumbens	0.875645403010496
LatentSpace_168	936	Olfactory tubercle	nucleus accumbens	0.872681041416618
LatentSpace_168	937	Olfactory tubercle	nucleus accumbens	0.868239005478015
LatentSpace_168	938	Olfactory tubercle	nucleus accumbens	0.858176059523615
LatentSpace_168	939	Olfactory tubercle	nucleus accumbens	0.844653439769802
LatentSpace_168	940	Olfactory tubercle	nucleus accumbens	0.870014664303332
LatentSpace_168	941	Olfactory tubercle	nucleus accumbens	0.878470749360789
LatentSpace_168	942	Olfactory tubercle	nucleus accumbens	0.890938693320631
LatentSpace_168	943	Olfactory tubercle	nucleus accumbens	0.894852551991167
LatentSpace_168	944	Olfactory tubercle	nucleus accumbens	0.892252222177756
LatentSpace_168	945	Olfactory tubercle	nucleus accumbens	0.885018786035379
LatentSpace_168	946	Olfactory tubercle	nucleus accumbens	0.880301038983318
LatentSpace_168	947	Olfactory tubercle	nucleus accumbens	0.870501514142671
LatentSpace_168	948	Olfactory tubercle	nucleus accumbens	0.85175291607308
LatentSpace_168	949	Olfactory tubercle	nucleus accumbens	0.8677850616138
LatentSpace_168	950	Olfactory tubercle	nucleus accumbens	0.864225092449902
LatentSpace_168	951	Olfactory tubercle	nucleus accumbens	0.85918560867988
LatentSpace_168	952	Olfactory tubercle	nucleus accumbens	0.850887740476664
LatentSpace_168	953	Olfactory tubercle	nucleus accumbens	0.845016395762509
LatentSpace_168	954	Olfactory tubercle	amygdala	0.832754043705096
LatentSpace_168	955	Olfactory tubercle	nucleus accumbens	0.865140434703061
LatentSpace_168	956	Olfactory tubercle	nucleus accumbens	0.873713620231787
LatentSpace_168	957	Olfactory tubercle	nucleus accumbens	0.879311156772712
LatentSpace_168	958	Olfactory tubercle	nucleus accumbens	0.885281957953961
LatentSpace_168	959	Olfactory tubercle	nucleus accumbens	0.878254085336846
LatentSpace_168	960	Olfactory tubercle	nucleus accumbens	0.860767954572096
LatentSpace_168	961	Olfactory tubercle	nucleus accumbens	0.857861571250962
LatentSpace_168	962	Olfactory tubercle	nucleus accumbens	0.863603106635005
LatentSpace_168	963	Olfactory tubercle	nucleus accumbens	0.872874327040449
LatentSpace_168	1329	Medial amygdalar nucleus	amygdala	0.90729194613668
LatentSpace_168	1342	Medial amygdalar nucleus	amygdala	0.913693556431648
LatentSpace_168	1364	Medial amygdalar nucleus	amygdala	0.913597746122657
LatentSpace_168	1433	Medial amygdalar nucleus	amygdala	0.912554516113233
LatentSpace_168	1434	Medial amygdalar nucleus	amygdala	0.907382451369404
LatentSpace_168	1447	Medial amygdalar nucleus	amygdala	0.925150073390551
LatentSpace_168	1448	Medial amygdalar nucleus	amygdala	0.926250527499378
LatentSpace_168	1466	Medial amygdalar nucleus	amygdala	0.90914989465745
LatentSpace_168	1467	Medial amygdalar nucleus	amygdala	0.901832473710939
LatentSpace_168	1468	Medial amygdalar nucleus	hypothalamus	0.892944752524545
LatentSpace_168	1480	Medial amygdalar nucleus	amygdala	0.925905236969237
LatentSpace_168	1499	Medial amygdalar nucleus	amygdala	0.894157703565931
LatentSpace_168	1500	Medial amygdalar nucleus	amygdala	0.888650036416042
LatentSpace_168	1629	Olfactory tubercle	amygdala	0.844440277018335
LatentSpace_168	1639	Olfactory tubercle	nucleus accumbens	0.869325164692334
LatentSpace_168	1654	Olfactory tubercle	nucleus accumbens	0.890237103789105
LatentSpace_168	1661	Olfactory tubercle	nucleus accumbens	0.853622005315421
LatentSpace_168	1662	Olfactory tubercle	nucleus accumbens	0.886643990036471
LatentSpace_168	1678	Olfactory tubercle	nucleus accumbens	0.917144317123694
LatentSpace_168	1679	Olfactory tubercle	nucleus accumbens	0.890052116767012
LatentSpace_168	1680	Olfactory tubercle	nucleus accumbens	0.829069221070485
LatentSpace_168	1682	Olfactory tubercle	nucleus accumbens	0.864729669723592
LatentSpace_168	1683	Olfactory tubercle	nucleus accumbens	0.907554062368776
LatentSpace_168	1700	Olfactory tubercle	nucleus accumbens	0.929534245391315
LatentSpace_168	1701	Olfactory tubercle	nucleus accumbens	0.919782176724387
LatentSpace_168	1702	Olfactory tubercle	nucleus accumbens	0.886041976735981
LatentSpace_168	1703	Olfactory tubercle	nucleus accumbens	0.885599108080574
LatentSpace_168	1704	Olfactory tubercle	nucleus accumbens	0.914289545038024
LatentSpace_168	1721	Olfactory tubercle	nucleus accumbens	0.928183717571371
LatentSpace_168	1722	Olfactory tubercle	nucleus accumbens	0.917522006576109
LatentSpace_168	1723	Olfactory tubercle	nucleus accumbens	0.892983782519225
LatentSpace_168	1724	Olfactory tubercle	nucleus accumbens	0.912430666560336
LatentSpace_168	1725	Olfactory tubercle	nucleus accumbens	0.914804260785855
LatentSpace_168	1733	Olfactory tubercle	septal nuclei	0.903935162003897
LatentSpace_168	1742	Olfactory tubercle	nucleus accumbens	0.918232734665709
LatentSpace_168	1743	Olfactory tubercle	nucleus accumbens	0.912268755008881
LatentSpace_168	1744	Olfactory tubercle	nucleus accumbens	0.894009733191551
LatentSpace_168	1745	Olfactory tubercle	nucleus accumbens	0.894893228933365
LatentSpace_168	1746	Olfactory tubercle	nucleus accumbens	0.904626691104207
LatentSpace_168	1747	Olfactory tubercle	nucleus accumbens	0.914330576420316
LatentSpace_168	1750	Olfactory tubercle	nucleus accumbens	0.898151752535197
LatentSpace_168	1751	Olfactory tubercle	nucleus accumbens	0.891346455682122
LatentSpace_168	1752	Olfactory tubercle	nucleus accumbens	0.875730040600858
LatentSpace_168	1753	Olfactory tubercle	nucleus accumbens	0.864740334682711
LatentSpace_168	1754	Olfactory tubercle	nucleus accumbens	0.893457859609219
LatentSpace_168	1755	Olfactory tubercle	nucleus accumbens	0.900506922446905
LatentSpace_168	1760	Olfactory tubercle	nucleus accumbens	0.905582977693365
LatentSpace_168	1761	Olfactory tubercle	nucleus accumbens	0.901738468680139
LatentSpace_168	1762	Olfactory tubercle	nucleus accumbens	0.875913844971718
LatentSpace_168	1763	Olfactory tubercle	nucleus accumbens	0.879975876729321
LatentSpace_168	1764	Olfactory tubercle	nucleus accumbens	0.892515048377844
LatentSpace_168	1765	Olfactory tubercle	nucleus accumbens	0.90567958797608
LatentSpace_168	1766	Olfactory tubercle	nucleus accumbens	0.906907506175393
LatentSpace_168	1767	Olfactory tubercle	nucleus accumbens	0.898500571203773
LatentSpace_168	1768	Olfactory tubercle	nucleus accumbens	0.885521148624414
LatentSpace_168	1769	Olfactory tubercle	nucleus accumbens	0.868985039533281
LatentSpace_168	1770	Olfactory tubercle	amygdala	0.851140889960289
LatentSpace_168	1771	Olfactory tubercle	amygdala	0.857347151867528
LatentSpace_168	1772	Olfactory tubercle	nucleus accumbens	0.867340852529156
LatentSpace_168	1773	Olfactory tubercle	nucleus accumbens	0.880734199058981
LatentSpace_168	1774	Olfactory tubercle	nucleus accumbens	0.888800605878509
LatentSpace_168	1775	Olfactory tubercle	nucleus accumbens	0.897900795251107
LatentSpace_168	1776	Olfactory tubercle	nucleus accumbens	0.90411440780028
LatentSpace_168	1777	Olfactory tubercle	nucleus accumbens	0.906219656088057
LatentSpace_168	1778	Olfactory tubercle	nucleus accumbens	0.902232655579775
LatentSpace_168	1779	Olfactory tubercle	nucleus accumbens	0.894264676808876
LatentSpace_168	1780	Olfactory tubercle	nucleus accumbens	0.874472137273841
LatentSpace_168	1781	Olfactory tubercle	nucleus accumbens	0.863610030580693
LatentSpace_168	1782	Olfactory tubercle	nucleus accumbens	0.898325270693476
LatentSpace_168	1783	Olfactory tubercle	nucleus accumbens	0.910177212898498
LatentSpace_168	1784	Olfactory tubercle	nucleus accumbens	0.905099543648611
LatentSpace_168	1785	Olfactory tubercle	nucleus accumbens	0.891128670095127
LatentSpace_168	1786	Olfactory tubercle	nucleus accumbens	0.869123721351629
LatentSpace_168	1787	Olfactory tubercle	nucleus accumbens	0.848768356325759
LatentSpace_168	1788	Olfactory tubercle	nucleus accumbens	0.872090709530175
LatentSpace_168	1789	Olfactory tubercle	nucleus accumbens	0.885075679780181
LatentSpace_168	1790	Olfactory tubercle	nucleus accumbens	0.895147824702071
LatentSpace_168	1791	Olfactory tubercle	nucleus accumbens	0.906215180150063
LatentSpace_168	1792	Olfactory tubercle	nucleus accumbens	0.900386531895083
LatentSpace_168	1793	Olfactory tubercle	nucleus accumbens	0.880820955911972
LatentSpace_168	1794	Olfactory tubercle	nucleus accumbens	0.862028924338351
LatentSpace_168	1795	Olfactory tubercle	nucleus accumbens	0.879087572896514
LatentSpace_168	1796	Olfactory tubercle	nucleus accumbens	0.843643004187089
LatentSpace_168	2272	Medial amygdalar nucleus	amygdala	0.922785366060657
LatentSpace_168	2287	Medial amygdalar nucleus	amygdala	0.933100798339458
LatentSpace_168	2288	Medial amygdalar nucleus	amygdala	0.926567515433799
LatentSpace_168	2308	Medial amygdalar nucleus	amygdala	0.915053539636127
LatentSpace_168	2309	Medial amygdalar nucleus	amygdala	0.919792113188078
LatentSpace_168	2310	Medial amygdalar nucleus	amygdala	0.921880501439191
LatentSpace_168	2311	Medial amygdalar nucleus	amygdala	0.91765612870099
LatentSpace_168	2325	Medial amygdalar nucleus	amygdala	0.927803554021189
LatentSpace_168	2326	Medial amygdalar nucleus	amygdala	0.927546463757904
LatentSpace_168	2327	Medial amygdalar nucleus	amygdala	0.920542759159952
LatentSpace_168	2328	Medial amygdalar nucleus	amygdala	0.922262803242849
LatentSpace_168	2348	Medial amygdalar nucleus	amygdala	0.915102782770155
LatentSpace_168	2349	Medial amygdalar nucleus	amygdala	0.918080787966122
LatentSpace_168	2350	Medial amygdalar nucleus	amygdala	0.919806335298186
LatentSpace_168	2363	Medial amygdalar nucleus	amygdala	0.92687955139544
LatentSpace_168	2364	Medial amygdalar nucleus	amygdala	0.914929575217427
LatentSpace_168	2365	Medial amygdalar nucleus	amygdala	0.909622529383535
LatentSpace_168	2366	Medial amygdalar nucleus	amygdala	0.91147486728075
LatentSpace_168	2368	Medial amygdalar nucleus	amygdala	0.902307421704342
LatentSpace_168	2385	Medial amygdalar nucleus	amygdala	0.915780995054571
LatentSpace_168	2386	Medial amygdalar nucleus	amygdala	0.912907123141078
LatentSpace_168	2405	Medial amygdalar nucleus	amygdala	0.916947732521279
LatentSpace_168	2406	Medial amygdalar nucleus	amygdala	0.915799468443205
LatentSpace_168	2407	Medial amygdalar nucleus	amygdala	0.908839512520395
LatentSpace_168	2425	Medial amygdalar nucleus	amygdala	0.915892545435313
LatentSpace_168	2426	Medial amygdalar nucleus	amygdala	0.916951311570606
LatentSpace_168	2427	Medial amygdalar nucleus	septal nuclei	0.911842194819292
LatentSpace_168	2440	Medial amygdalar nucleus	amygdala	0.922640938237094
LatentSpace_168	2441	Medial amygdalar nucleus	amygdala	0.924430232871213
LatentSpace_168	2460	Medial amygdalar nucleus	amygdala	0.914121971858537
LatentSpace_168	2461	Medial amygdalar nucleus	amygdala	0.908178558216659
LatentSpace_168	2474	Medial amygdalar nucleus	amygdala	0.917623710572123
LatentSpace_168	2475	Medial amygdalar nucleus	amygdala	0.918952390389448
LatentSpace_168	2494	Medial amygdalar nucleus	amygdala	0.907817722616811
LatentSpace_168	2495	Medial amygdalar nucleus	amygdala	0.902884091544997
LatentSpace_168	2508	Medial amygdalar nucleus	amygdala	0.905640933089263
LatentSpace_168	2509	Medial amygdalar nucleus	amygdala	0.9118528795865
LatentSpace_168	2710	Olfactory tubercle	nucleus accumbens	0.865145924268586
LatentSpace_168	2736	Olfactory tubercle	nucleus accumbens	0.901368677442464
LatentSpace_168	2738	Olfactory tubercle	piriform cortex	0.793982938432631
LatentSpace_168	2739	Olfactory tubercle	nucleus accumbens	0.823286860226211
LatentSpace_168	2740	Olfactory tubercle	nucleus accumbens	0.881179575562574
LatentSpace_168	2744	Nucleus accumbens	nucleus accumbens	0.937997615410095
LatentSpace_168	2757	Nucleus accumbens	nucleus accumbens	0.924512374596677
LatentSpace_168	2761	Olfactory tubercle	nucleus accumbens	0.895246153103084
LatentSpace_168	2762	Olfactory tubercle	nucleus accumbens	0.84425568425886
LatentSpace_168	2763	Olfactory tubercle	nucleus accumbens	0.894141148691587
LatentSpace_168	2764	Olfactory tubercle	nucleus accumbens	0.916301665532034
LatentSpace_168	2767	Nucleus accumbens	nucleus accumbens	0.936012413692262
LatentSpace_168	2768	Nucleus accumbens	nucleus accumbens	0.924606939129383
LatentSpace_168	2769	Nucleus accumbens	nucleus accumbens	0.910775745787113
LatentSpace_168	2780	Nucleus accumbens	nucleus accumbens	0.92828076215881
LatentSpace_168	2781	Nucleus accumbens	nucleus accumbens	0.930251813208472
LatentSpace_168	2785	Olfactory tubercle	nucleus accumbens	0.909090940502523
LatentSpace_168	2786	Olfactory tubercle	nucleus accumbens	0.875522019150942
LatentSpace_168	2787	Olfactory tubercle	nucleus accumbens	0.874535135999383
LatentSpace_168	2788	Olfactory tubercle	nucleus accumbens	0.902072656457047
LatentSpace_168	2789	Olfactory tubercle	nucleus accumbens	0.915235250748435
LatentSpace_168	2793	Nucleus accumbens	nucleus accumbens	0.918440646605662
LatentSpace_168	2794	Nucleus accumbens	nucleus accumbens	0.907130014022538
LatentSpace_168	2798	Olfactory tubercle	septal nuclei	0.902624059930718
LatentSpace_168	2800	Olfactory tubercle	nucleus accumbens	0.887701405700807
LatentSpace_168	2803	Nucleus accumbens	nucleus accumbens	0.929246510283529
LatentSpace_168	2804	Nucleus accumbens	nucleus accumbens	0.930239075355786
LatentSpace_168	2808	Olfactory tubercle	nucleus accumbens	0.906522920447745
LatentSpace_168	2809	Olfactory tubercle	nucleus accumbens	0.879123845030694
LatentSpace_168	2810	Olfactory tubercle	nucleus accumbens	0.850877261946714
LatentSpace_168	2811	Olfactory tubercle	nucleus accumbens	0.875954106785036
LatentSpace_168	2812	Olfactory tubercle	nucleus accumbens	0.894219778261299
LatentSpace_168	2813	Olfactory tubercle	nucleus accumbens	0.906212216205921
LatentSpace_168	2819	Nucleus accumbens	nucleus accumbens	0.873996888510151
LatentSpace_168	2820	Olfactory tubercle	nucleus accumbens	0.860145385780917
LatentSpace_168	2821	Olfactory tubercle	nucleus accumbens	0.880583894028412
LatentSpace_168	2828	Olfactory tubercle	nucleus accumbens	0.907098765274345
LatentSpace_168	2829	Olfactory tubercle	nucleus accumbens	0.890118245074891
LatentSpace_168	2830	Olfactory tubercle	nucleus accumbens	0.854339449351988
LatentSpace_168	2831	Olfactory tubercle	nucleus accumbens	0.866382668148678
LatentSpace_168	2832	Olfactory tubercle	nucleus accumbens	0.888221135539303
LatentSpace_168	2833	Olfactory tubercle	nucleus accumbens	0.909024522806561
LatentSpace_168	2834	Olfactory tubercle	nucleus accumbens	0.917708079252781
LatentSpace_168	2835	Olfactory tubercle	nucleus accumbens	0.922277206120522
LatentSpace_168	2839	Olfactory tubercle	nucleus accumbens	0.859991853589728
LatentSpace_168	2840	Olfactory tubercle	nucleus accumbens	0.869435152104659
LatentSpace_168	2841	Olfactory tubercle	nucleus accumbens	0.87979503180121
LatentSpace_168	2845	Olfactory tubercle	nucleus accumbens	0.924310754819613
LatentSpace_168	2846	Olfactory tubercle	nucleus accumbens	0.911035372212513
LatentSpace_168	2847	Olfactory tubercle	nucleus accumbens	0.88884848543862
LatentSpace_168	2848	Olfactory tubercle	nucleus accumbens	0.874899389976632
LatentSpace_168	2849	Olfactory tubercle	nucleus accumbens	0.905956443256693
LatentSpace_168	2850	Olfactory tubercle	nucleus accumbens	0.918221674948883
LatentSpace_168	2851	Olfactory tubercle	nucleus accumbens	0.909128663991341
LatentSpace_168	2852	Olfactory tubercle	nucleus accumbens	0.892063593495675
LatentSpace_168	2853	Olfactory tubercle	nucleus accumbens	0.870809914454056
LatentSpace_168	2854	Olfactory tubercle	nucleus accumbens	0.847649208311222
LatentSpace_168	2855	Olfactory tubercle	nucleus accumbens	0.870617833902622
LatentSpace_168	2856	Olfactory tubercle	nucleus accumbens	0.885596555275062
LatentSpace_168	2857	Olfactory tubercle	nucleus accumbens	0.907201116303959
LatentSpace_168	2858	Olfactory tubercle	nucleus accumbens	0.920507707180388
LatentSpace_168	2859	Olfactory tubercle	nucleus accumbens	0.928068193512109
LatentSpace_168	2860	Olfactory tubercle	nucleus accumbens	0.924699898314759
LatentSpace_168	2861	Olfactory tubercle	nucleus accumbens	0.893110321452505
LatentSpace_168	2862	Olfactory tubercle	nucleus accumbens	0.846842629553883
LatentSpace_168	2863	Olfactory tubercle	nucleus accumbens	0.828031763913378
LatentSpace_168	2864	Olfactory tubercle	nucleus accumbens	0.857786144129841
LatentSpace_168	2865	Olfactory tubercle	nucleus accumbens	0.878418900997094
LatentSpace_168	3485	Medial amygdalar nucleus	amygdala	0.935238287877251
LatentSpace_168	3486	Medial amygdalar nucleus	amygdala	0.919703481653825
LatentSpace_168	3487	Medial amygdalar nucleus	septal nuclei	0.914072863370323
LatentSpace_168	3498	Medial amygdalar nucleus	amygdala	0.931818648765966
LatentSpace_168	3499	Medial amygdalar nucleus	amygdala	0.944512882864775
LatentSpace_168	3500	Medial amygdalar nucleus	amygdala	0.943891359038649
LatentSpace_168	3501	Medial amygdalar nucleus	amygdala	0.940788358088786
LatentSpace_168	3522	Medial amygdalar nucleus	amygdala	0.927444034024896
LatentSpace_168	3523	Medial amygdalar nucleus	amygdala	0.930594879966706
LatentSpace_168	3524	Medial amygdalar nucleus	amygdala	0.923427661897915
LatentSpace_168	3525	Medial amygdalar nucleus	amygdala	0.903942117737329
LatentSpace_168	3537	Medial amygdalar nucleus	amygdala	0.922962126414653
LatentSpace_168	3538	Medial amygdalar nucleus	amygdala	0.926198827903161
LatentSpace_168	3539	Medial amygdalar nucleus	amygdala	0.929954459684722
LatentSpace_168	3540	Medial amygdalar nucleus	amygdala	0.92799645037609
LatentSpace_168	3560	Medial amygdalar nucleus	amygdala	0.916670474653692
LatentSpace_168	3561	Medial amygdalar nucleus	amygdala	0.920417564274707
LatentSpace_168	3562	Medial amygdalar nucleus	amygdala	0.917524981648009
LatentSpace_168	3563	Medial amygdalar nucleus	amygdala	0.915251214871731
LatentSpace_168	3564	Medial amygdalar nucleus	septal nuclei	0.904804276919417
LatentSpace_168	3576	Medial amygdalar nucleus	amygdala	0.916735059412079
LatentSpace_168	3577	Medial amygdalar nucleus	amygdala	0.916779044319475
LatentSpace_168	3578	Medial amygdalar nucleus	amygdala	0.909955701657447
LatentSpace_168	3579	Medial amygdalar nucleus	amygdala	0.912755782594605
LatentSpace_168	3580	Medial amygdalar nucleus	amygdala	0.909253407838935
LatentSpace_168	3598	Medial amygdalar nucleus	amygdala	0.914408343907813
LatentSpace_168	3599	Medial amygdalar nucleus	amygdala	0.918965450776609
LatentSpace_168	3600	Medial amygdalar nucleus	amygdala	0.91542103205668
LatentSpace_168	3601	Medial amygdalar nucleus	amygdala	0.913355676681972
LatentSpace_168	3614	Medial amygdalar nucleus	amygdala	0.910739756509717
LatentSpace_168	3615	Medial amygdalar nucleus	amygdala	0.909713191796595
LatentSpace_168	3616	Medial amygdalar nucleus	amygdala	0.912241839257304
LatentSpace_168	3617	Medial amygdalar nucleus	amygdala	0.909904225525592
LatentSpace_168	3635	Medial amygdalar nucleus	amygdala	0.917201525447034
LatentSpace_168	3636	Medial amygdalar nucleus	amygdala	0.91418780465124
LatentSpace_168	3637	Medial amygdalar nucleus	amygdala	0.909097740005508
LatentSpace_168	3651	Medial amygdalar nucleus	amygdala	0.914276914950965
LatentSpace_168	3652	Medial amygdalar nucleus	amygdala	0.917572142204211
LatentSpace_168	3653	Medial amygdalar nucleus	amygdala	0.917599756762042
LatentSpace_168	3673	Medial amygdalar nucleus	amygdala	0.911406163291806
LatentSpace_168	3674	Medial amygdalar nucleus	amygdala	0.908950745062183
LatentSpace_168	3690	Medial amygdalar nucleus	amygdala	0.912216731068076
LatentSpace_168	3691	Medial amygdalar nucleus	amygdala	0.916152027706959
LatentSpace_168	3711	Medial amygdalar nucleus	amygdala	0.906708584237968
LatentSpace_168	3730	Medial amygdalar nucleus	amygdala	0.897258671404037
LatentSpace_168	3931	Nucleus accumbens	nucleus accumbens	0.891641255468701
LatentSpace_168	3932	Nucleus accumbens	nucleus accumbens	0.909476276247366
LatentSpace_168	3933	Nucleus accumbens	nucleus accumbens	0.902216468765752
LatentSpace_168	3953	Nucleus accumbens	nucleus accumbens	0.92818160803291
LatentSpace_168	3965	Nucleus accumbens	nucleus accumbens	0.916525576722826
LatentSpace_168	3966	Nucleus accumbens	nucleus accumbens	0.937756414662676
LatentSpace_168	3967	Nucleus accumbens	nucleus accumbens	0.937792256256894
[truncated: 771,001 more rows]
