# Supplementary material for: Whole-brain comparison of rodent and human brains using spatial transcriptomics
Source: eLife. 2022 Nov 7;11:e79418. doi: 10.7554/eLife.79418 (PMC9708081; doi:10.7554/eLife.79418)
Supplement: Figure 6—source data 5. [file elife-79418-fig6-data5.csv]

Data	VoxelID	MouseRegion	TopHumanRegion	MaxCorrelation
LatentSpace_334	14164	Caudoputamen	caudate nucleus	0.978005788811276
LatentSpace_334	14165	Caudoputamen	caudate nucleus	0.981810501389417
LatentSpace_334	14166	Caudoputamen	caudate nucleus	0.98514548726719
LatentSpace_334	14167	Caudoputamen	nucleus accumbens	0.980149488139767
LatentSpace_334	14171	Lateral septal complex	septal nuclei	0.937486550940541
LatentSpace_334	14177	Caudoputamen	nucleus accumbens	0.981858900561851
LatentSpace_334	14178	Caudoputamen	caudate nucleus	0.986534995399477
LatentSpace_334	14179	Caudoputamen	caudate nucleus	0.988291474081811
LatentSpace_334	14180	Caudoputamen	caudate nucleus	0.987809405464808
LatentSpace_334	14181	Caudoputamen	caudate nucleus	0.984076395996566
LatentSpace_334	14182	Caudoputamen	caudate nucleus	0.979671563645323
LatentSpace_334	14183	Caudoputamen	caudate nucleus	0.972508461135707
LatentSpace_334	14184	Caudoputamen	caudate nucleus	0.962671952757139
LatentSpace_334	14185	Caudoputamen	caudate nucleus	0.911151714008935
LatentSpace_334	14197	Caudoputamen	caudate nucleus	0.92334243486992
LatentSpace_334	14198	Caudoputamen	caudate nucleus	0.961618153941243
LatentSpace_334	14199	Caudoputamen	caudate nucleus	0.974991981626905
LatentSpace_334	14200	Caudoputamen	caudate nucleus	0.981239050670795
LatentSpace_334	14201	Caudoputamen	caudate nucleus	0.983622046782316
LatentSpace_334	14202	Caudoputamen	caudate nucleus	0.985792315302452
LatentSpace_334	14203	Caudoputamen	caudate nucleus	0.986983379328048
LatentSpace_334	14204	Caudoputamen	caudate nucleus	0.982069290778729
LatentSpace_334	14205	Caudoputamen	nucleus accumbens	0.988381319886866
LatentSpace_334	14209	Lateral septal complex	septal nuclei	0.932208435636002
LatentSpace_334	14210	Lateral septal complex	septal nuclei	0.933737188015605
LatentSpace_334	14214	Lateral septal complex	septal nuclei	0.935527677232779
LatentSpace_334	14217	Caudoputamen	nucleus accumbens	0.989058573044662
LatentSpace_334	14218	Caudoputamen	nucleus accumbens	0.982413349866025
LatentSpace_334	14219	Caudoputamen	caudate nucleus	0.985598597976458
LatentSpace_334	14220	Caudoputamen	caudate nucleus	0.987852418612163
LatentSpace_334	14221	Caudoputamen	caudate nucleus	0.988130389117168
LatentSpace_334	14222	Caudoputamen	caudate nucleus	0.984960869263915
LatentSpace_334	14223	Caudoputamen	caudate nucleus	0.979422522424736
LatentSpace_334	14224	Caudoputamen	caudate nucleus	0.96834765312262
LatentSpace_334	14225	Caudoputamen	caudate nucleus	0.93230868212872
LatentSpace_334	14238	Caudoputamen	caudate nucleus	0.944605396786929
LatentSpace_334	14239	Caudoputamen	caudate nucleus	0.970689881021955
LatentSpace_334	14240	Caudoputamen	caudate nucleus	0.977423029395708
LatentSpace_334	14241	Caudoputamen	caudate nucleus	0.981349851425916
LatentSpace_334	14242	Caudoputamen	caudate nucleus	0.985350498861662
LatentSpace_334	14243	Caudoputamen	caudate nucleus	0.9848627763728
LatentSpace_334	14244	Caudoputamen	caudate nucleus	0.981568417900362
LatentSpace_334	14245	Caudoputamen	nucleus accumbens	0.984856268652929
LatentSpace_334	14248	Lateral septal complex	septal nuclei	0.905865445707252
LatentSpace_334	14249	Lateral septal complex	septal nuclei	0.91965894537089
LatentSpace_334	14252	Lateral septal complex	septal nuclei	0.919675391974695
LatentSpace_334	14253	Lateral septal complex	septal nuclei	0.902260768089958
LatentSpace_334	14254	Nucleus accumbens	nucleus accumbens	0.900761287288044
LatentSpace_334	14256	Caudoputamen	nucleus accumbens	0.985267810976756
LatentSpace_334	14257	Caudoputamen	nucleus accumbens	0.986326407835898
LatentSpace_334	14258	Caudoputamen	nucleus accumbens	0.984204323757882
LatentSpace_334	14259	Caudoputamen	caudate nucleus	0.981254667929781
LatentSpace_334	14260	Caudoputamen	caudate nucleus	0.984939280364356
LatentSpace_334	14261	Caudoputamen	caudate nucleus	0.9861011603725
LatentSpace_334	14262	Caudoputamen	caudate nucleus	0.983021642034831
LatentSpace_334	14263	Caudoputamen	caudate nucleus	0.973550711862156
LatentSpace_334	14264	Caudoputamen	caudate nucleus	0.941333780336631
LatentSpace_334	14277	Caudoputamen	caudate nucleus	0.940815978638527
LatentSpace_334	14278	Caudoputamen	caudate nucleus	0.969884300308193
LatentSpace_334	14279	Caudoputamen	caudate nucleus	0.97882815410119
LatentSpace_334	14280	Caudoputamen	caudate nucleus	0.980310415142929
LatentSpace_334	14281	Caudoputamen	caudate nucleus	0.980447698898884
LatentSpace_334	14282	Caudoputamen	nucleus accumbens	0.976032297610911
LatentSpace_334	14283	Caudoputamen	nucleus accumbens	0.984421654737602
LatentSpace_334	14284	Nucleus accumbens	nucleus accumbens	0.98329873634738
LatentSpace_334	14285	Nucleus accumbens	nucleus accumbens	0.956480802736685
LatentSpace_334	14286	Nucleus accumbens	nucleus accumbens	0.915348362528538
LatentSpace_334	14287	Lateral septal complex	septal nuclei	0.880339301924106
LatentSpace_334	14288	Lateral septal complex	septal nuclei	0.903817018098441
LatentSpace_334	14291	Lateral septal complex	septal nuclei	0.887648124779121
LatentSpace_334	14292	Nucleus accumbens	nucleus accumbens	0.890264190059245
LatentSpace_334	14293	Nucleus accumbens	nucleus accumbens	0.922126009467859
LatentSpace_334	14294	Nucleus accumbens	nucleus accumbens	0.958864947855367
LatentSpace_334	14295	Nucleus accumbens	nucleus accumbens	0.982098884815032
LatentSpace_334	14296	Nucleus accumbens	nucleus accumbens	0.985359996760338
LatentSpace_334	14297	Caudoputamen	nucleus accumbens	0.983592946875873
LatentSpace_334	14298	Caudoputamen	nucleus accumbens	0.980553634294052
LatentSpace_334	14299	Caudoputamen	caudate nucleus	0.978830488294596
LatentSpace_334	14300	Caudoputamen	caudate nucleus	0.979389386236321
LatentSpace_334	14301	Caudoputamen	caudate nucleus	0.969656143402149
LatentSpace_334	14302	Caudoputamen	caudate nucleus	0.935759803771877
LatentSpace_334	14316	Caudoputamen	caudate nucleus	0.925710658313008
LatentSpace_334	14317	Caudoputamen	caudate nucleus	0.960367454514302
LatentSpace_334	14318	Caudoputamen	caudate nucleus	0.970156253001766
LatentSpace_334	14319	Caudoputamen	caudate nucleus	0.973282376553067
LatentSpace_334	14320	Caudoputamen	nucleus accumbens	0.974987995432013
LatentSpace_334	14321	Caudoputamen	nucleus accumbens	0.981444015101606
LatentSpace_334	14322	Nucleus accumbens	nucleus accumbens	0.97948300593799
LatentSpace_334	14323	Nucleus accumbens	nucleus accumbens	0.960148074605411
LatentSpace_334	14324	Nucleus accumbens	nucleus accumbens	0.921227273890498
LatentSpace_334	14325	Nucleus accumbens	nucleus accumbens	0.870582955045207
LatentSpace_334	14326	Lateral septal complex	septal nuclei	0.890688702166868
LatentSpace_334	14329	Lateral septal complex	septal nuclei	0.869925408338239
LatentSpace_334	14330	Nucleus accumbens	nucleus accumbens	0.896105460449175
LatentSpace_334	14331	Nucleus accumbens	nucleus accumbens	0.937044070369074
LatentSpace_334	14332	Nucleus accumbens	nucleus accumbens	0.96331349556991
LatentSpace_334	14333	Nucleus accumbens	nucleus accumbens	0.978544312485483
LatentSpace_334	14334	Nucleus accumbens	nucleus accumbens	0.98249464347804
LatentSpace_334	14335	Caudoputamen	nucleus accumbens	0.980303801022897
LatentSpace_334	14336	Caudoputamen	nucleus accumbens	0.977630158278648
LatentSpace_334	14337	Caudoputamen	nucleus accumbens	0.968091373730352
LatentSpace_334	14338	Caudoputamen	caudate nucleus	0.954548904886206
LatentSpace_334	14339	Caudoputamen	nucleus accumbens	0.917848511454098
LatentSpace_334	14354	Caudoputamen	nucleus accumbens	0.907142360890597
LatentSpace_334	14355	Caudoputamen	nucleus accumbens	0.942939299551183
LatentSpace_334	14356	Caudoputamen	nucleus accumbens	0.960255315898801
LatentSpace_334	14357	Caudoputamen	nucleus accumbens	0.971217598080098
LatentSpace_334	14358	Nucleus accumbens	nucleus accumbens	0.977130396845051
LatentSpace_334	14359	Nucleus accumbens	nucleus accumbens	0.976915205051144
LatentSpace_334	14360	Nucleus accumbens	nucleus accumbens	0.959758921198837
LatentSpace_334	14361	Nucleus accumbens	nucleus accumbens	0.925252852557617
LatentSpace_334	14362	Nucleus accumbens	amygdala	0.898616838575699
LatentSpace_334	14363	Lateral septal complex	amygdala	0.910518872559884
LatentSpace_334	14366	Lateral septal complex	amygdala	0.918994002356109
LatentSpace_334	14367	Nucleus accumbens	nucleus accumbens	0.885031056488815
LatentSpace_334	14368	Nucleus accumbens	nucleus accumbens	0.936587536953865
LatentSpace_334	14369	Nucleus accumbens	nucleus accumbens	0.96242630549168
LatentSpace_334	14370	Nucleus accumbens	nucleus accumbens	0.974515095880983
LatentSpace_334	14371	Nucleus accumbens	nucleus accumbens	0.976234621404294
LatentSpace_334	14372	Caudoputamen	nucleus accumbens	0.97136598802934
LatentSpace_334	14373	Caudoputamen	nucleus accumbens	0.960849230278176
LatentSpace_334	14374	Caudoputamen	nucleus accumbens	0.940704348003714
LatentSpace_334	14375	Nucleus accumbens	nucleus accumbens	0.899841148296268
LatentSpace_334	14391	Nucleus accumbens	nucleus accumbens	0.921533355437052
LatentSpace_334	14392	Nucleus accumbens	nucleus accumbens	0.950780123369336
LatentSpace_334	14393	Nucleus accumbens	nucleus accumbens	0.966555208199654
LatentSpace_334	14394	Nucleus accumbens	nucleus accumbens	0.968105696238317
LatentSpace_334	14395	Nucleus accumbens	nucleus accumbens	0.950541030342011
LatentSpace_334	14396	Nucleus accumbens	nucleus accumbens	0.895880891635005
LatentSpace_334	14397	Nucleus accumbens	amygdala	0.920444493449726
LatentSpace_334	14402	Nucleus accumbens	amygdala	0.901276283166679
LatentSpace_334	14403	Nucleus accumbens	nucleus accumbens	0.914023374040942
LatentSpace_334	14404	Nucleus accumbens	nucleus accumbens	0.956988880717582
LatentSpace_334	14405	Nucleus accumbens	nucleus accumbens	0.968977161169274
LatentSpace_334	14406	Nucleus accumbens	nucleus accumbens	0.962559695337791
LatentSpace_334	14407	Nucleus accumbens	nucleus accumbens	0.942532733472396
LatentSpace_334	14408	Nucleus accumbens	nucleus accumbens	0.909877153836394
LatentSpace_334	14425	Nucleus accumbens	nucleus accumbens	0.941246217383535
LatentSpace_334	14426	Nucleus accumbens	nucleus accumbens	0.907247521484203
LatentSpace_334	14427	Nucleus accumbens	amygdala	0.904452713752788
LatentSpace_334	14434	Nucleus accumbens	amygdala	0.878222289497322
LatentSpace_334	14435	Nucleus accumbens	nucleus accumbens	0.916621420672948
LatentSpace_334	14436	Nucleus accumbens	nucleus accumbens	0.941588565524895
LatentSpace_334	14437	Nucleus accumbens	nucleus accumbens	0.868276302049184
LatentSpace_334	15608	Caudoputamen	nucleus accumbens	0.924337337234156
LatentSpace_334	15653	Caudoputamen	nucleus accumbens	0.92535512117885
LatentSpace_334	15654	Caudoputamen	nucleus accumbens	0.935034934405106
LatentSpace_334	15694	Caudoputamen	nucleus accumbens	0.862796606320023
LatentSpace_334	15695	Caudoputamen	caudate nucleus	0.913238752345177
LatentSpace_334	15696	Caudoputamen	caudate nucleus	0.927164671411895
LatentSpace_334	15721	Caudoputamen	nucleus accumbens	0.941973619036609
LatentSpace_334	15722	Caudoputamen	nucleus accumbens	0.922797956024151
LatentSpace_334	15723	Caudoputamen	nucleus accumbens	0.877128509496429
LatentSpace_334	15737	Caudoputamen	caudate nucleus	0.889154755462922
LatentSpace_334	15738	Caudoputamen	caudate nucleus	0.936613246148118
LatentSpace_334	15739	Caudoputamen	caudate nucleus	0.950116620544431
LatentSpace_334	15740	Caudoputamen	caudate nucleus	0.941343048588964
LatentSpace_334	15759	Caudoputamen	caudate nucleus	0.944633708537259
LatentSpace_334	15760	Caudoputamen	caudate nucleus	0.960641705071897
LatentSpace_334	15761	Caudoputamen	caudate nucleus	0.94562277209765
LatentSpace_334	15762	Caudoputamen	caudate nucleus	0.897583649331238
LatentSpace_334	15774	Caudoputamen	caudate nucleus	0.902288195223698
LatentSpace_334	15775	Caudoputamen	caudate nucleus	0.945132532798423
LatentSpace_334	15776	Caudoputamen	caudate nucleus	0.959536900352519
LatentSpace_334	15777	Caudoputamen	caudate nucleus	0.953726761403887
LatentSpace_334	15778	Caudoputamen	putamen	0.925690221120933
LatentSpace_334	15799	Caudoputamen	caudate nucleus	0.963431177789827
LatentSpace_334	15800	Caudoputamen	caudate nucleus	0.967358907258457
LatentSpace_334	15801	Caudoputamen	caudate nucleus	0.953719199437482
LatentSpace_334	15802	Caudoputamen	caudate nucleus	0.906958384482157
LatentSpace_334	15814	Caudoputamen	caudate nucleus	0.887040788074466
LatentSpace_334	15815	Caudoputamen	caudate nucleus	0.941144744626137
LatentSpace_334	15816	Caudoputamen	caudate nucleus	0.955438306005048
LatentSpace_334	15817	Caudoputamen	caudate nucleus	0.958030922090833
LatentSpace_334	15818	Caudoputamen	putamen	0.947654057091288
LatentSpace_334	15841	Caudoputamen	caudate nucleus	0.948530319736731
LatentSpace_334	15842	Caudoputamen	caudate nucleus	0.966916359088819
LatentSpace_334	15843	Caudoputamen	caudate nucleus	0.963297865694702
LatentSpace_334	15844	Caudoputamen	caudate nucleus	0.947518077036763
LatentSpace_334	15845	Caudoputamen	caudate nucleus	0.896243002526549
LatentSpace_334	15859	Caudoputamen	caudate nucleus	0.930154705668378
LatentSpace_334	15860	Caudoputamen	caudate nucleus	0.950772689553505
LatentSpace_334	15861	Caudoputamen	caudate nucleus	0.95705577197748
LatentSpace_334	15862	Caudoputamen	putamen	0.953843623325092
LatentSpace_334	15863	Caudoputamen	putamen	0.942376229351413
LatentSpace_334	15879	Caudoputamen	putamen	0.957580536677169
LatentSpace_334	15880	Caudoputamen	caudate nucleus	0.970490367461625
LatentSpace_334	15881	Caudoputamen	caudate nucleus	0.970032578421504
LatentSpace_334	15882	Caudoputamen	caudate nucleus	0.964946552492659
LatentSpace_334	15883	Caudoputamen	caudate nucleus	0.944346122450083
LatentSpace_334	15884	Caudoputamen	caudate nucleus	0.876089958418778
LatentSpace_334	15897	Caudoputamen	caudate nucleus	0.914080579866295
LatentSpace_334	15898	Caudoputamen	caudate nucleus	0.94624107742193
LatentSpace_334	15899	Caudoputamen	caudate nucleus	0.953458128069195
LatentSpace_334	15900	Caudoputamen	putamen	0.959184028371174
LatentSpace_334	15901	Caudoputamen	putamen	0.961932517508332
LatentSpace_334	15902	Caudoputamen	putamen	0.960105571538666
LatentSpace_334	15918	Caudoputamen	putamen	0.953111025471673
LatentSpace_334	15919	Caudoputamen	caudate nucleus	0.971472325598237
LatentSpace_334	15920	Caudoputamen	caudate nucleus	0.976891530856038
LatentSpace_334	15921	Caudoputamen	caudate nucleus	0.973528295066125
LatentSpace_334	15922	Caudoputamen	caudate nucleus	0.96991463726434
LatentSpace_334	15923	Caudoputamen	caudate nucleus	0.962566152746098
LatentSpace_334	15924	Caudoputamen	caudate nucleus	0.934741475269523
LatentSpace_334	15937	Caudoputamen	caudate nucleus	0.868633434285306
LatentSpace_334	15938	Caudoputamen	caudate nucleus	0.928805683404263
LatentSpace_334	15939	Caudoputamen	caudate nucleus	0.949644251710968
LatentSpace_334	15940	Caudoputamen	caudate nucleus	0.957045383887481
LatentSpace_334	15941	Caudoputamen	caudate nucleus	0.961137201085804
LatentSpace_334	15942	Caudoputamen	caudate nucleus	0.966893527879333
LatentSpace_334	15943	Caudoputamen	caudate nucleus	0.968002159435503
LatentSpace_334	15944	Caudoputamen	caudate nucleus	0.971717374641792
LatentSpace_334	15945	Caudoputamen	caudate nucleus	0.969821126063852
LatentSpace_334	15954	Caudoputamen	caudate nucleus	0.966075943633568
LatentSpace_334	15955	Caudoputamen	caudate nucleus	0.975010352214157
LatentSpace_334	15956	Caudoputamen	caudate nucleus	0.978743563531884
LatentSpace_334	15957	Caudoputamen	caudate nucleus	0.980194558536803
LatentSpace_334	15958	Caudoputamen	caudate nucleus	0.976724996460183
LatentSpace_334	15959	Caudoputamen	caudate nucleus	0.969983970269211
LatentSpace_334	15960	Caudoputamen	caudate nucleus	0.965887540787516
LatentSpace_334	15961	Caudoputamen	caudate nucleus	0.954943482831406
LatentSpace_334	15962	Caudoputamen	caudate nucleus	0.911172854207515
LatentSpace_334	15974	Caudoputamen	caudate nucleus	0.830551070570232
LatentSpace_334	15975	Caudoputamen	caudate nucleus	0.917775776837142
LatentSpace_334	15976	Caudoputamen	caudate nucleus	0.951294452501301
LatentSpace_334	15977	Caudoputamen	caudate nucleus	0.959532120729438
LatentSpace_334	15978	Caudoputamen	caudate nucleus	0.960725289477657
LatentSpace_334	15979	Caudoputamen	caudate nucleus	0.965305408943067
LatentSpace_334	15980	Caudoputamen	caudate nucleus	0.971214294216703
LatentSpace_334	15981	Caudoputamen	caudate nucleus	0.979272325010972
LatentSpace_334	15982	Caudoputamen	caudate nucleus	0.984129681801998
LatentSpace_334	15983	Caudoputamen	nucleus accumbens	0.977715329611186
LatentSpace_334	15992	Caudoputamen	nucleus accumbens	0.977365346203879
LatentSpace_334	15993	Caudoputamen	caudate nucleus	0.984853867514582
LatentSpace_334	15994	Caudoputamen	caudate nucleus	0.985175057667244
LatentSpace_334	15995	Caudoputamen	caudate nucleus	0.983682007892356
LatentSpace_334	15996	Caudoputamen	caudate nucleus	0.982097474341779
LatentSpace_334	15997	Caudoputamen	caudate nucleus	0.977899537649472
LatentSpace_334	15998	Caudoputamen	caudate nucleus	0.971239426266439
LatentSpace_334	15999	Caudoputamen	caudate nucleus	0.96462604681356
LatentSpace_334	16000	Caudoputamen	caudate nucleus	0.945297625899817
LatentSpace_334	16001	Caudoputamen	caudate nucleus	0.868333101745243
LatentSpace_334	16013	Caudoputamen	caudate nucleus	0.90220298672016
LatentSpace_334	16014	Caudoputamen	caudate nucleus	0.94814360307887
LatentSpace_334	16015	Caudoputamen	caudate nucleus	0.960381351668399
LatentSpace_334	16016	Caudoputamen	caudate nucleus	0.965511469519304
LatentSpace_334	16017	Caudoputamen	caudate nucleus	0.972001689847159
LatentSpace_334	16018	Caudoputamen	caudate nucleus	0.976966523707286
LatentSpace_334	16019	Caudoputamen	caudate nucleus	0.981736911728486
LatentSpace_334	16020	Caudoputamen	caudate nucleus	0.985880689097234
LatentSpace_334	16021	Caudoputamen	caudate nucleus	0.984626429268757
LatentSpace_334	16024	Lateral septal complex	septal nuclei	0.936453757558766
LatentSpace_334	16025	Lateral septal complex	septal nuclei	0.93892134828735
LatentSpace_334	16026	Lateral septal complex	septal nuclei	0.940125534132421
LatentSpace_334	16030	Lateral septal complex	septal nuclei	0.938530076977982
LatentSpace_334	16031	Lateral septal complex	septal nuclei	0.93508847237785
LatentSpace_334	16034	Caudoputamen	caudate nucleus	0.985545778979093
LatentSpace_334	16035	Caudoputamen	caudate nucleus	0.987856177588557
LatentSpace_334	16036	Caudoputamen	caudate nucleus	0.98720592770808
LatentSpace_334	16037	Caudoputamen	caudate nucleus	0.985165696296355
LatentSpace_334	16038	Caudoputamen	caudate nucleus	0.982063760693875
LatentSpace_334	16039	Caudoputamen	caudate nucleus	0.976368061421539
LatentSpace_334	16040	Caudoputamen	caudate nucleus	0.967224976842863
LatentSpace_334	16041	Caudoputamen	caudate nucleus	0.954430284969972
LatentSpace_334	16042	Caudoputamen	caudate nucleus	0.913098083181344
LatentSpace_334	16055	Caudoputamen	caudate nucleus	0.924450710019692
LatentSpace_334	16056	Caudoputamen	caudate nucleus	0.956958498308087
LatentSpace_334	16057	Caudoputamen	caudate nucleus	0.971042439293342
LatentSpace_334	16058	Caudoputamen	caudate nucleus	0.977793861544689
LatentSpace_334	16059	Caudoputamen	caudate nucleus	0.98105421900199
LatentSpace_334	16060	Caudoputamen	caudate nucleus	0.984962278697611
LatentSpace_334	16061	Caudoputamen	caudate nucleus	0.986579463014677
LatentSpace_334	16062	Caudoputamen	caudate nucleus	0.987588647488384
LatentSpace_334	16063	Caudoputamen	nucleus accumbens	0.985379224435759
LatentSpace_334	16064	Caudoputamen	nucleus accumbens	0.978874119475743
LatentSpace_334	16066	Lateral septal complex	septal nuclei	0.930869479335614
LatentSpace_334	16067	Lateral septal complex	septal nuclei	0.924306974636347
LatentSpace_334	16068	Lateral septal complex	septal nuclei	0.92797976083033
LatentSpace_334	16072	Lateral septal complex	septal nuclei	0.933027173046926
LatentSpace_334	16073	Lateral septal complex	septal nuclei	0.930266623675082
LatentSpace_334	16075	Caudoputamen	nucleus accumbens	0.985882686432914
LatentSpace_334	16076	Caudoputamen	nucleus accumbens	0.98474659798852
LatentSpace_334	16077	Caudoputamen	caudate nucleus	0.985679954126704
LatentSpace_334	16078	Caudoputamen	caudate nucleus	0.98694785709801
LatentSpace_334	16079	Caudoputamen	caudate nucleus	0.986783052070276
LatentSpace_334	16080	Caudoputamen	caudate nucleus	0.985703375632291
LatentSpace_334	16081	Caudoputamen	caudate nucleus	0.98319695558841
LatentSpace_334	16082	Caudoputamen	caudate nucleus	0.979066289875385
LatentSpace_334	16083	Caudoputamen	caudate nucleus	0.964627358368606
LatentSpace_334	16084	Caudoputamen	caudate nucleus	0.93452238574494
LatentSpace_334	16097	Caudoputamen	caudate nucleus	0.862968799069848
LatentSpace_334	16098	Caudoputamen	caudate nucleus	0.943538372044235
LatentSpace_334	16099	Caudoputamen	caudate nucleus	0.968411728127739
LatentSpace_334	16100	Caudoputamen	caudate nucleus	0.976047741183303
LatentSpace_334	16101	Caudoputamen	caudate nucleus	0.980006523282392
LatentSpace_334	16102	Caudoputamen	caudate nucleus	0.985306982488051
LatentSpace_334	16103	Caudoputamen	caudate nucleus	0.985836778123465
LatentSpace_334	16104	Caudoputamen	caudate nucleus	0.985834395376644
LatentSpace_334	16105	Caudoputamen	caudate nucleus	0.982368807400377
LatentSpace_334	16106	Caudoputamen	nucleus accumbens	0.981152059453996
LatentSpace_334	16107	Lateral septal complex	septal nuclei	0.911883090211257
LatentSpace_334	16108	Lateral septal complex	septal nuclei	0.906258497211541
LatentSpace_334	16109	Lateral septal complex	septal nuclei	0.916324709020656
LatentSpace_334	16112	Lateral septal complex	septal nuclei	0.918599101267298
LatentSpace_334	16113	Lateral septal complex	septal nuclei	0.90738937984734
LatentSpace_334	16114	Lateral septal complex	septal nuclei	0.900294578916467
LatentSpace_334	16116	Caudoputamen	nucleus accumbens	0.984835182569248
LatentSpace_334	16117	Caudoputamen	nucleus accumbens	0.984804450934035
LatentSpace_334	16118	Caudoputamen	caudate nucleus	0.981768934474018
LatentSpace_334	16119	Caudoputamen	caudate nucleus	0.984087032448333
LatentSpace_334	16120	Caudoputamen	caudate nucleus	0.985474113694746
LatentSpace_334	16121	Caudoputamen	caudate nucleus	0.985520932145688
LatentSpace_334	16122	Caudoputamen	caudate nucleus	0.982962271644774
LatentSpace_334	16123	Caudoputamen	caudate nucleus	0.974877671320231
LatentSpace_334	16124	Caudoputamen	caudate nucleus	0.948670662507847
LatentSpace_334	16138	Caudoputamen	caudate nucleus	0.870381972261864
LatentSpace_334	16139	Caudoputamen	caudate nucleus	0.948637752313286
LatentSpace_334	16140	Caudoputamen	caudate nucleus	0.972574852292073
LatentSpace_334	16141	Caudoputamen	caudate nucleus	0.980344980670415
LatentSpace_334	16142	Caudoputamen	caudate nucleus	0.983882629140354
LatentSpace_334	16143	Caudoputamen	caudate nucleus	0.983369125001696
LatentSpace_334	16144	Caudoputamen	caudate nucleus	0.98205386259988
LatentSpace_334	16145	Caudoputamen	nucleus accumbens	0.981243011114339
LatentSpace_334	16146	Caudoputamen	nucleus accumbens	0.984331882061338
LatentSpace_334	16147	Nucleus accumbens	nucleus accumbens	0.906629776759256
LatentSpace_334	16148	Lateral septal complex	septal nuclei	0.887525937343511
LatentSpace_334	16149	Lateral septal complex	septal nuclei	0.904283536719106
LatentSpace_334	16152	Lateral septal complex	septal nuclei	0.899131404819791
LatentSpace_334	16153	Lateral septal complex	septal nuclei	0.880224838772617
LatentSpace_334	16154	Lateral septal complex	nucleus accumbens	0.910392222322024
LatentSpace_334	16155	Nucleus accumbens	nucleus accumbens	0.962094549760485
LatentSpace_334	16156	Caudoputamen	nucleus accumbens	0.983361441677058
LatentSpace_334	16157	Caudoputamen	nucleus accumbens	0.985589193645911
LatentSpace_334	16158	Caudoputamen	nucleus accumbens	0.98081967277813
LatentSpace_334	16159	Caudoputamen	caudate nucleus	0.980023055158491
LatentSpace_334	16160	Caudoputamen	caudate nucleus	0.982737693385056
LatentSpace_334	16161	Caudoputamen	caudate nucleus	0.982082397262256
LatentSpace_334	16162	Caudoputamen	caudate nucleus	0.973254517771261
LatentSpace_334	16163	Caudoputamen	caudate nucleus	0.945534891921301
LatentSpace_334	16177	Caudoputamen	caudate nucleus	0.855437055817894
LatentSpace_334	16178	Caudoputamen	caudate nucleus	0.9374090978731
LatentSpace_334	16179	Caudoputamen	caudate nucleus	0.967249279944316
LatentSpace_334	16180	Caudoputamen	caudate nucleus	0.97752225313844
LatentSpace_334	16181	Caudoputamen	caudate nucleus	0.978854619407135
LatentSpace_334	16182	Caudoputamen	caudate nucleus	0.9787217057992
LatentSpace_334	16183	Caudoputamen	nucleus accumbens	0.980255201985694
LatentSpace_334	16184	Caudoputamen	nucleus accumbens	0.982106157526391
LatentSpace_334	16185	Nucleus accumbens	nucleus accumbens	0.966717568648431
LatentSpace_334	16186	Nucleus accumbens	nucleus accumbens	0.923182832161898
LatentSpace_334	16187	Lateral septal complex	amygdala	0.873227073627551
LatentSpace_334	16188	Lateral septal complex	septal nuclei	0.886092073846646
LatentSpace_334	16189	Lateral septal complex	septal nuclei	0.915731438284162
LatentSpace_334	16190	Lateral septal complex	septal nuclei	0.911381897820033
LatentSpace_334	16191	Lateral septal complex	amygdala	0.883697044700618
LatentSpace_334	16192	Lateral septal complex	amygdala	0.882826056574539
LatentSpace_334	16193	Nucleus accumbens	nucleus accumbens	0.927852681956746
LatentSpace_334	16194	Nucleus accumbens	nucleus accumbens	0.964673106599394
LatentSpace_334	16195	Caudoputamen	nucleus accumbens	0.980807017259115
LatentSpace_334	16196	Caudoputamen	nucleus accumbens	0.979969614604912
LatentSpace_334	16197	Caudoputamen	nucleus accumbens	0.975984522820772
LatentSpace_334	16198	Caudoputamen	caudate nucleus	0.976486398447761
LatentSpace_334	16199	Caudoputamen	caudate nucleus	0.973932331379764
LatentSpace_334	16200	Caudoputamen	caudate nucleus	0.960827659765436
LatentSpace_334	16201	Caudoputamen	caudate nucleus	0.925549520877255
LatentSpace_334	16202	Caudoputamen	claustrum	0.871420676945133
LatentSpace_334	16217	Caudoputamen	caudate nucleus	0.910340626905737
LatentSpace_334	16218	Caudoputamen	caudate nucleus	0.945826815243516
LatentSpace_334	16219	Caudoputamen	nucleus accumbens	0.960363712588206
LatentSpace_334	16220	Caudoputamen	nucleus accumbens	0.971636903164528
LatentSpace_334	16221	Caudoputamen	nucleus accumbens	0.978947537319154
LatentSpace_334	16222	Nucleus accumbens	nucleus accumbens	0.980999777102583
LatentSpace_334	16223	Nucleus accumbens	nucleus accumbens	0.969048036185883
LatentSpace_334	16224	Nucleus accumbens	nucleus accumbens	0.924926392911406
LatentSpace_334	16225	Lateral septal complex	amygdala	0.908142707494954
LatentSpace_334	16231	Nucleus accumbens	nucleus accumbens	0.917919483221971
LatentSpace_334	16232	Nucleus accumbens	nucleus accumbens	0.962688732557506
LatentSpace_334	16233	Nucleus accumbens	nucleus accumbens	0.976151547456361
LatentSpace_334	16234	Caudoputamen	nucleus accumbens	0.975678611072293
LatentSpace_334	16235	Caudoputamen	nucleus accumbens	0.966706532261932
LatentSpace_334	16236	Caudoputamen	nucleus accumbens	0.954899202280895
LatentSpace_334	16237	Caudoputamen	caudate nucleus	0.92936652855455
LatentSpace_334	16238	Caudoputamen	nucleus accumbens	0.889503459378222
LatentSpace_334	16239	Caudoputamen	claustrum	0.898087453299722
LatentSpace_334	16254	Caudoputamen	nucleus accumbens	0.876747347347456
LatentSpace_334	16255	Caudoputamen	nucleus accumbens	0.920938764252734
LatentSpace_334	16256	Caudoputamen	nucleus accumbens	0.955070609024551
LatentSpace_334	16257	Nucleus accumbens	nucleus accumbens	0.970756125638331
LatentSpace_334	16258	Nucleus accumbens	nucleus accumbens	0.974673553580267
LatentSpace_334	16259	Nucleus accumbens	nucleus accumbens	0.957692318765057
LatentSpace_334	16260	Nucleus accumbens	nucleus accumbens	0.895996324393251
LatentSpace_334	16265	Nucleus accumbens	nucleus accumbens	0.895081806740232
LatentSpace_334	16266	Nucleus accumbens	nucleus accumbens	0.954527901178288
LatentSpace_334	16267	Nucleus accumbens	nucleus accumbens	0.969186580054579
LatentSpace_334	16268	Nucleus accumbens	nucleus accumbens	0.963326506988047
LatentSpace_334	16269	Nucleus accumbens	nucleus accumbens	0.941142832063854
LatentSpace_334	16270	Caudoputamen	nucleus accumbens	0.909732720675337
LatentSpace_334	16288	Nucleus accumbens	claustrum	0.861454074083787
LatentSpace_334	16289	Nucleus accumbens	nucleus accumbens	0.897952086208933
LatentSpace_334	16290	Nucleus accumbens	nucleus accumbens	0.94568436272477
LatentSpace_334	16291	Nucleus accumbens	nucleus accumbens	0.95170882636961
LatentSpace_334	16292	Nucleus accumbens	nucleus accumbens	0.909639991273234
LatentSpace_334	16293	Nucleus accumbens	amygdala	0.915437973838521
LatentSpace_334	16300	Nucleus accumbens	amygdala	0.886624711706108
LatentSpace_334	16301	Nucleus accumbens	nucleus accumbens	0.911980219874307
LatentSpace_334	16302	Nucleus accumbens	nucleus accumbens	0.930656938133916
LatentSpace_334	16303	Nucleus accumbens	nucleus accumbens	0.90640620772657
LatentSpace_334	16304	Nucleus accumbens	nucleus accumbens	0.873489421300888
LatentSpace_334	17391	Caudoputamen	nucleus accumbens	0.9388053525492
LatentSpace_334	17392	Caudoputamen	nucleus accumbens	0.923631661216501
LatentSpace_334	17432	Caudoputamen	nucleus accumbens	0.948368497557087
LatentSpace_334	17433	Caudoputamen	nucleus accumbens	0.971984102736618
LatentSpace_334	17458	Caudoputamen	nucleus accumbens	0.941277719386005
LatentSpace_334	17459	Caudoputamen	nucleus accumbens	0.916591064115166
LatentSpace_334	17474	Caudoputamen	nucleus accumbens	0.937058380121244
LatentSpace_334	17475	Caudoputamen	nucleus accumbens	0.960398956541061
LatentSpace_334	17502	Caudoputamen	nucleus accumbens	0.947445767433952
LatentSpace_334	17503	Caudoputamen	nucleus accumbens	0.919372008961112
LatentSpace_334	17518	Caudoputamen	caudate nucleus	0.916611075847897
LatentSpace_334	17519	Caudoputamen	caudate nucleus	0.941616111890481
LatentSpace_334	17548	Caudoputamen	nucleus accumbens	0.933521893564699
LatentSpace_334	17549	Caudoputamen	nucleus accumbens	0.90533541593821
LatentSpace_334	17564	Caudoputamen	caudate nucleus	0.924953121393975
LatentSpace_334	17565	Caudoputamen	caudate nucleus	0.943598865683886
LatentSpace_334	17566	Caudoputamen	caudate nucleus	0.942477552332927
LatentSpace_334	17591	Caudoputamen	caudate nucleus	0.944149763646181
LatentSpace_334	17592	Caudoputamen	caudate nucleus	0.948196978928331
LatentSpace_334	17593	Caudoputamen	caudate nucleus	0.923992995248303
LatentSpace_334	17594	Caudoputamen	caudate nucleus	0.838571785865303
LatentSpace_334	17607	Caudoputamen	caudate nucleus	0.930040270118302
LatentSpace_334	17608	Caudoputamen	caudate nucleus	0.946797844589065
LatentSpace_334	17609	Caudoputamen	caudate nucleus	0.947245752361912
LatentSpace_334	17610	Caudoputamen	putamen	0.93666053894344
LatentSpace_334	17635	Caudoputamen	caudate nucleus	0.940547179228731
LatentSpace_334	17636	Caudoputamen	caudate nucleus	0.965360077037287
LatentSpace_334	17637	Caudoputamen	caudate nucleus	0.96141026374603
LatentSpace_334	17638	Caudoputamen	caudate nucleus	0.93270714451265
LatentSpace_334	17639	Caudoputamen	caudate nucleus	0.85581769961727
LatentSpace_334	17653	Caudoputamen	caudate nucleus	0.922540527088991
LatentSpace_334	17654	Caudoputamen	caudate nucleus	0.948308196447976
LatentSpace_334	17655	Caudoputamen	caudate nucleus	0.955224616445636
LatentSpace_334	17656	Caudoputamen	putamen	0.947423154570971
LatentSpace_334	17679	Caudoputamen	caudate nucleus	0.959774965783147
LatentSpace_334	17680	Caudoputamen	caudate nucleus	0.969925646375427
LatentSpace_334	17681	Caudoputamen	caudate nucleus	0.964124482164375
LatentSpace_334	17682	Caudoputamen	caudate nucleus	0.932852402942459
LatentSpace_334	17695	Caudoputamen	caudate nucleus	0.907730901921861
LatentSpace_334	17696	Caudoputamen	caudate nucleus	0.943748856042381
LatentSpace_334	17697	Caudoputamen	caudate nucleus	0.953713902244781
LatentSpace_334	17698	Caudoputamen	caudate nucleus	0.955401262404123
LatentSpace_334	17699	Caudoputamen	putamen	0.948581477933074
LatentSpace_334	17723	Caudoputamen	caudate nucleus	0.961704956981982
LatentSpace_334	17724	Caudoputamen	caudate nucleus	0.962354675284247
LatentSpace_334	17725	Caudoputamen	caudate nucleus	0.953219898352564
LatentSpace_334	17726	Caudoputamen	caudate nucleus	0.914239842337846
LatentSpace_334	17738	Caudoputamen	caudate nucleus	0.885351177412056
LatentSpace_334	17739	Caudoputamen	caudate nucleus	0.933694224914482
LatentSpace_334	17740	Caudoputamen	caudate nucleus	0.949474348233261
LatentSpace_334	17741	Caudoputamen	caudate nucleus	0.954227385079849
LatentSpace_334	17742	Caudoputamen	putamen	0.954936604257003
LatentSpace_334	17743	Caudoputamen	putamen	0.943563405048028
LatentSpace_334	17760	Caudoputamen	putamen	0.953004170741047
LatentSpace_334	17761	Caudoputamen	caudate nucleus	0.962881212607903
LatentSpace_334	17762	Caudoputamen	caudate nucleus	0.962269668965483
LatentSpace_334	17763	Caudoputamen	caudate nucleus	0.961931735626949
LatentSpace_334	17764	Caudoputamen	caudate nucleus	0.949080712749761
LatentSpace_334	17765	Caudoputamen	caudate nucleus	0.898539122204512
LatentSpace_334	17778	Caudoputamen	caudate nucleus	0.917683808149706
LatentSpace_334	17779	Caudoputamen	caudate nucleus	0.947918377799517
LatentSpace_334	17780	Caudoputamen	caudate nucleus	0.956628372704511
LatentSpace_334	17781	Caudoputamen	putamen	0.962016830801262
LatentSpace_334	17782	Caudoputamen	putamen	0.963642121670209
LatentSpace_334	17783	Caudoputamen	putamen	0.95939056001067
LatentSpace_334	17784	Caudoputamen	putamen	0.9444585128773
LatentSpace_334	17799	Caudoputamen	putamen	0.969286863018297
LatentSpace_334	17800	Caudoputamen	putamen	0.972674387637547
LatentSpace_334	17801	Caudoputamen	caudate nucleus	0.967231625877478
LatentSpace_334	17802	Caudoputamen	caudate nucleus	0.962084807952556
LatentSpace_334	17803	Caudoputamen	caudate nucleus	0.95786885424896
LatentSpace_334	17804	Caudoputamen	caudate nucleus	0.937546509471827
LatentSpace_334	17818	Caudoputamen	caudate nucleus	0.87455584799143
LatentSpace_334	17819	Caudoputamen	caudate nucleus	0.931097496511553
LatentSpace_334	17820	Caudoputamen	caudate nucleus	0.951856505062047
LatentSpace_334	17821	Caudoputamen	caudate nucleus	0.957685552831857
LatentSpace_334	17822	Caudoputamen	caudate nucleus	0.957717195119843
LatentSpace_334	17823	Caudoputamen	caudate nucleus	0.961590097597071
LatentSpace_334	17824	Caudoputamen	putamen	0.962575242083578
LatentSpace_334	17825	Caudoputamen	caudate nucleus	0.967490348478845
LatentSpace_334	17826	Caudoputamen	caudate nucleus	0.968485708485101
LatentSpace_334	17833	Caudoputamen	caudate nucleus	0.968717709022854
LatentSpace_334	17834	Caudoputamen	caudate nucleus	0.974560387619283
LatentSpace_334	17835	Caudoputamen	caudate nucleus	0.975679264669398
LatentSpace_334	17836	Caudoputamen	caudate nucleus	0.975413555432498
LatentSpace_334	17837	Caudoputamen	caudate nucleus	0.972766800063218
LatentSpace_334	17838	Caudoputamen	caudate nucleus	0.96638507876391
LatentSpace_334	17839	Caudoputamen	caudate nucleus	0.960416795224574
LatentSpace_334	17840	Caudoputamen	caudate nucleus	0.949931521111745
LatentSpace_334	17841	Caudoputamen	caudate nucleus	0.913012408353865
LatentSpace_334	17854	Caudoputamen	caudate nucleus	0.842162801574337
LatentSpace_334	17855	Caudoputamen	caudate nucleus	0.919937712429564
LatentSpace_334	17856	Caudoputamen	caudate nucleus	0.951086666753181
LatentSpace_334	17857	Caudoputamen	caudate nucleus	0.957145648398551
LatentSpace_334	17858	Caudoputamen	caudate nucleus	0.955330163881691
LatentSpace_334	17859	Caudoputamen	caudate nucleus	0.961916499693533
LatentSpace_334	17860	Caudoputamen	caudate nucleus	0.967322811200769
LatentSpace_334	17861	Caudoputamen	caudate nucleus	0.974266267000213
LatentSpace_334	17862	Caudoputamen	caudate nucleus	0.981483302476405
LatentSpace_334	17863	Caudoputamen	caudate nucleus	0.980701448671185
LatentSpace_334	17866	Lateral septal complex	septal nuclei	0.931212152777547
LatentSpace_334	17867	Lateral septal complex	septal nuclei	0.941677872693631
LatentSpace_334	17868	Lateral septal complex	septal nuclei	0.927387583697243
LatentSpace_334	17869	Lateral septal complex	septal nuclei	0.92406323098032
LatentSpace_334	17872	Caudoputamen	caudate nucleus	0.978109240154245
LatentSpace_334	17873	Caudoputamen	caudate nucleus	0.985067352676744
LatentSpace_334	17874	Caudoputamen	caudate nucleus	0.98421335210791
LatentSpace_334	17875	Caudoputamen	caudate nucleus	0.983087134615725
LatentSpace_334	17876	Caudoputamen	caudate nucleus	0.979667644087854
LatentSpace_334	17877	Caudoputamen	caudate nucleus	0.975911810469337
LatentSpace_334	17878	Caudoputamen	caudate nucleus	0.969496605516857
LatentSpace_334	17879	Caudoputamen	caudate nucleus	0.961011772894167
LatentSpace_334	17880	Caudoputamen	caudate nucleus	0.940205763470024
LatentSpace_334	17881	Caudoputamen	caudate nucleus	0.865387582029765
LatentSpace_334	17894	Caudoputamen	caudate nucleus	0.909792066191667
LatentSpace_334	17895	Caudoputamen	caudate nucleus	0.946072065511049
LatentSpace_334	17896	Caudoputamen	caudate nucleus	0.958019163332367
LatentSpace_334	17897	Caudoputamen	caudate nucleus	0.963003942053038
LatentSpace_334	17898	Caudoputamen	caudate nucleus	0.970898627262949
LatentSpace_334	17899	Caudoputamen	caudate nucleus	0.973927378528341
LatentSpace_334	17900	Caudoputamen	caudate nucleus	0.979203061739302
LatentSpace_334	17901	Caudoputamen	caudate nucleus	0.983825151059432
LatentSpace_334	17902	Caudoputamen	caudate nucleus	0.987168302353542
LatentSpace_334	17904	Lateral septal complex	septal nuclei	0.930565659305486
LatentSpace_334	17905	Lateral septal complex	septal nuclei	0.926224845809707
LatentSpace_334	17906	Lateral septal complex	septal nuclei	0.928584228423562
LatentSpace_334	17910	Lateral septal complex	septal nuclei	0.929745879306133
LatentSpace_334	17911	Lateral septal complex	septal nuclei	0.930589647956594
LatentSpace_334	17913	Caudoputamen	caudate nucleus	0.986065118707696
LatentSpace_334	17914	Caudoputamen	caudate nucleus	0.985427139326594
LatentSpace_334	17915	Caudoputamen	caudate nucleus	0.983432023362484
LatentSpace_334	17916	Caudoputamen	caudate nucleus	0.981149291671627
LatentSpace_334	17917	Caudoputamen	caudate nucleus	0.978609321817314
LatentSpace_334	17918	Caudoputamen	caudate nucleus	0.975677780113137
LatentSpace_334	17919	Caudoputamen	caudate nucleus	0.965968035861053
LatentSpace_334	17920	Caudoputamen	caudate nucleus	0.948680342006793
LatentSpace_334	17921	Caudoputamen	caudate nucleus	0.908295736742287
LatentSpace_334	17934	Caudoputamen	caudate nucleus	0.920768046287092
LatentSpace_334	17935	Caudoputamen	caudate nucleus	0.951686146229282
LatentSpace_334	17936	Caudoputamen	caudate nucleus	0.967297138407764
LatentSpace_334	17937	Caudoputamen	caudate nucleus	0.975779760842848
LatentSpace_334	17938	Caudoputamen	caudate nucleus	0.977750883219936
LatentSpace_334	17939	Caudoputamen	caudate nucleus	0.981951417998334
LatentSpace_334	17940	Caudoputamen	caudate nucleus	0.98502990694135
LatentSpace_334	17941	Caudoputamen	caudate nucleus	0.988042468285763
LatentSpace_334	17942	Caudoputamen	caudate nucleus	0.984979647574078
LatentSpace_334	17944	Lateral septal complex	septal nuclei	0.91891542897512
LatentSpace_334	17945	Lateral septal complex	septal nuclei	0.927097818945656
LatentSpace_334	17946	Lateral septal complex	septal nuclei	0.916488059853487
LatentSpace_334	17947	Lateral septal complex	septal nuclei	0.924524370565115
LatentSpace_334	17951	Lateral septal complex	septal nuclei	0.925748996152002
LatentSpace_334	17952	Lateral septal complex	septal nuclei	0.929629599408328
LatentSpace_334	17953	Lateral septal complex	nucleus accumbens	0.927135216469975
LatentSpace_334	17954	Caudoputamen	nucleus accumbens	0.984864464080377
LatentSpace_334	17955	Caudoputamen	caudate nucleus	0.984967265522681
LatentSpace_334	17956	Caudoputamen	caudate nucleus	0.987057332050269
LatentSpace_334	17957	Caudoputamen	caudate nucleus	0.985658602706493
LatentSpace_334	17958	Caudoputamen	caudate nucleus	0.983402283826444
LatentSpace_334	17959	Caudoputamen	caudate nucleus	0.982686276342156
LatentSpace_334	17960	Caudoputamen	caudate nucleus	0.978873850665309
LatentSpace_334	17961	Caudoputamen	caudate nucleus	0.974889629578555
LatentSpace_334	17962	Caudoputamen	caudate nucleus	0.962148212065499
LatentSpace_334	17963	Caudoputamen	caudate nucleus	0.931807768729172
LatentSpace_334	17964	Caudoputamen	caudate nucleus	0.837995680120371
LatentSpace_334	17976	Caudoputamen	caudate nucleus	0.85474847190348
LatentSpace_334	17977	Caudoputamen	caudate nucleus	0.934574782544779
LatentSpace_334	17978	Caudoputamen	caudate nucleus	0.965945828759264
LatentSpace_334	17979	Caudoputamen	caudate nucleus	0.977874589613803
LatentSpace_334	17980	Caudoputamen	caudate nucleus	0.980334538387812
LatentSpace_334	17981	Caudoputamen	caudate nucleus	0.985135042198129
LatentSpace_334	17982	Caudoputamen	caudate nucleus	0.986324805749228
LatentSpace_334	17983	Caudoputamen	caudate nucleus	0.986860756369449
LatentSpace_334	17984	Caudoputamen	caudate nucleus	0.986657343895696
LatentSpace_334	17985	Caudoputamen	nucleus accumbens	0.980006657556506
LatentSpace_334	17986	Lateral septal complex	septal nuclei	0.913354698807914
LatentSpace_334	17987	Lateral septal complex	septal nuclei	0.903250695298373
LatentSpace_334	17988	Lateral septal complex	septal nuclei	0.91016380183018
LatentSpace_334	17991	Lateral septal complex	septal nuclei	0.921827875538755
LatentSpace_334	17992	Lateral septal complex	septal nuclei	0.910624541632748
LatentSpace_334	17993	Lateral septal complex	septal nuclei	0.906818125010197
LatentSpace_334	17994	Caudoputamen	nucleus accumbens	0.983779168988846
LatentSpace_334	17995	Caudoputamen	nucleus accumbens	0.982480068322387
LatentSpace_334	17996	Caudoputamen	caudate nucleus	0.985230028526498
LatentSpace_334	17997	Caudoputamen	caudate nucleus	0.985007124356094
LatentSpace_334	17998	Caudoputamen	caudate nucleus	0.983637025869067
LatentSpace_334	17999	Caudoputamen	caudate nucleus	0.98245602749926
LatentSpace_334	18000	Caudoputamen	caudate nucleus	0.978726995519638
LatentSpace_334	18001	Caudoputamen	caudate nucleus	0.971488816111649
LatentSpace_334	18002	Caudoputamen	caudate nucleus	0.950613457805868
LatentSpace_334	18016	Caudoputamen	caudate nucleus	0.871134419031253
LatentSpace_334	18017	Caudoputamen	caudate nucleus	0.949880849817765
LatentSpace_334	18018	Caudoputamen	caudate nucleus	0.973361767294675
LatentSpace_334	18019	Caudoputamen	caudate nucleus	0.981895193781552
LatentSpace_334	18020	Caudoputamen	caudate nucleus	0.985793041993057
LatentSpace_334	18021	Caudoputamen	caudate nucleus	0.985528048506665
LatentSpace_334	18022	Caudoputamen	caudate nucleus	0.985097721415328
LatentSpace_334	18023	Caudoputamen	caudate nucleus	0.983350069128949
LatentSpace_334	18024	Caudoputamen	nucleus accumbens	0.983780358169236
LatentSpace_334	18025	Lateral septal complex	septal nuclei	0.896357794535815
LatentSpace_334	18026	Lateral septal complex	septal nuclei	0.891624056241894
LatentSpace_334	18027	Lateral septal complex	septal nuclei	0.898966039842875
LatentSpace_334	18030	Lateral septal complex	septal nuclei	0.90366798269329
LatentSpace_334	18031	Lateral septal complex	septal nuclei	0.889638466430974
LatentSpace_334	18032	Lateral septal complex	nucleus accumbens	0.900207703189837
LatentSpace_334	18033	Caudoputamen	nucleus accumbens	0.984641598381731
LatentSpace_334	18034	Caudoputamen	nucleus accumbens	0.984518700971342
LatentSpace_334	18035	Caudoputamen	caudate nucleus	0.983391308737362
LatentSpace_334	18036	Caudoputamen	caudate nucleus	0.983609872964024
LatentSpace_334	18037	Caudoputamen	caudate nucleus	0.983298359631688
LatentSpace_334	18038	Caudoputamen	caudate nucleus	0.980698080339885
LatentSpace_334	18039	Caudoputamen	caudate nucleus	0.97124953822084
LatentSpace_334	18040	Caudoputamen	caudate nucleus	0.946286915472345
LatentSpace_334	18041	Caudoputamen	caudate nucleus	0.860571766655397
LatentSpace_334	18054	Caudoputamen	caudate nucleus	0.866407298362968
LatentSpace_334	18055	Caudoputamen	caudate nucleus	0.940982430734407
LatentSpace_334	18056	Caudoputamen	caudate nucleus	0.969010267227061
LatentSpace_334	18057	Caudoputamen	caudate nucleus	0.97975977233951
LatentSpace_334	18058	Caudoputamen	caudate nucleus	0.982024892570315
LatentSpace_334	18059	Caudoputamen	caudate nucleus	0.982776503942844
LatentSpace_334	18060	Caudoputamen	caudate nucleus	0.981069032056373
LatentSpace_334	18061	Caudoputamen	nucleus accumbens	0.982753165359259
LatentSpace_334	18062	Caudoputamen	nucleus accumbens	0.97078997927963
LatentSpace_334	18063	Lateral septal complex	nucleus accumbens	0.914519900881937
LatentSpace_334	18064	Lateral septal complex	amygdala	0.887019942510953
LatentSpace_334	18065	Lateral septal complex	amygdala	0.88592869395418
LatentSpace_334	18066	Lateral septal complex	septal nuclei	0.896959606723099
LatentSpace_334	18067	Lateral septal complex	septal nuclei	0.891634133037834
LatentSpace_334	18068	Lateral septal complex	amygdala	0.892178444247916
LatentSpace_334	18069	Lateral septal complex	amygdala	0.887797550139521
LatentSpace_334	18070	Lateral septal complex	nucleus accumbens	0.913430471879357
LatentSpace_334	18071	Caudoputamen	nucleus accumbens	0.981075462413625
LatentSpace_334	18072	Caudoputamen	nucleus accumbens	0.978160615542842
LatentSpace_334	18073	Caudoputamen	caudate nucleus	0.982373405393608
LatentSpace_334	18074	Caudoputamen	caudate nucleus	0.981655817430796
LatentSpace_334	18075	Caudoputamen	caudate nucleus	0.976459991156894
LatentSpace_334	18076	Caudoputamen	caudate nucleus	0.963329820869677
LatentSpace_334	18077	Caudoputamen	caudate nucleus	0.924631486515699
LatentSpace_334	18078	Caudoputamen	claustrum	0.865208481897503
LatentSpace_334	18093	Caudoputamen	claustrum	0.875248130466583
LatentSpace_334	18094	Caudoputamen	caudate nucleus	0.915411127840643
LatentSpace_334	18095	Caudoputamen	caudate nucleus	0.949746509218339
LatentSpace_334	18096	Caudoputamen	caudate nucleus	0.963180086734097
LatentSpace_334	18097	Caudoputamen	caudate nucleus	0.972167028684525
LatentSpace_334	18098	Caudoputamen	nucleus accumbens	0.976889045921007
LatentSpace_334	18099	Caudoputamen	nucleus accumbens	0.982651842870098
LatentSpace_334	18100	Nucleus accumbens	nucleus accumbens	0.971590103866418
LatentSpace_334	18101	Nucleus accumbens	nucleus accumbens	0.919071378167204
LatentSpace_334	18108	Nucleus accumbens	nucleus accumbens	0.898286117254181
LatentSpace_334	18109	Nucleus accumbens	nucleus accumbens	0.961498151133873
LatentSpace_334	18110	Caudoputamen	nucleus accumbens	0.975228524336189
LatentSpace_334	18111	Caudoputamen	nucleus accumbens	0.973234401716675
LatentSpace_334	18112	Caudoputamen	caudate nucleus	0.96603837860558
LatentSpace_334	18113	Caudoputamen	caudate nucleus	0.958959775507653
LatentSpace_334	18114	Caudoputamen	caudate nucleus	0.930695301443806
LatentSpace_334	18115	Caudoputamen	caudate nucleus	0.880312607626968
LatentSpace_334	18116	Caudoputamen	claustrum	0.902619733713209
LatentSpace_334	18132	Caudoputamen	nucleus accumbens	0.863108831681088
LatentSpace_334	18133	Caudoputamen	caudate nucleus	0.91394679807893
LatentSpace_334	18134	Caudoputamen	nucleus accumbens	0.946073171363446
LatentSpace_334	18135	Caudoputamen	nucleus accumbens	0.967440382436214
LatentSpace_334	18136	Nucleus accumbens	nucleus accumbens	0.975012191009289
LatentSpace_334	18137	Nucleus accumbens	nucleus accumbens	0.95691708080415
LatentSpace_334	18138	Nucleus accumbens	nucleus accumbens	0.887495446974028
LatentSpace_334	18143	Nucleus accumbens	nucleus accumbens	0.871001108922336
LatentSpace_334	18144	Nucleus accumbens	nucleus accumbens	0.948659693648832
LatentSpace_334	18145	Nucleus accumbens	nucleus accumbens	0.963948416665006
LatentSpace_334	18146	Caudoputamen	nucleus accumbens	0.956976490115148
LatentSpace_334	18147	Caudoputamen	nucleus accumbens	0.934514211084612
LatentSpace_334	18148	Caudoputamen	nucleus accumbens	0.896849164171929
LatentSpace_334	18149	Caudoputamen	claustrum	0.882906434208659
LatentSpace_334	18150	Caudoputamen	claustrum	0.937263837698564
LatentSpace_334	18166	Nucleus accumbens	claustrum	0.885793780567811
LatentSpace_334	18167	Nucleus accumbens	nucleus accumbens	0.881149066048476
LatentSpace_334	18168	Nucleus accumbens	nucleus accumbens	0.928450490441983
LatentSpace_334	18169	Nucleus accumbens	nucleus accumbens	0.941803189104768
LatentSpace_334	18170	Nucleus accumbens	nucleus accumbens	0.903001449890615
LatentSpace_334	18179	Nucleus accumbens	nucleus accumbens	0.895129706963419
LatentSpace_334	18180	Nucleus accumbens	nucleus accumbens	0.913584193810387
LatentSpace_334	18181	Nucleus accumbens	nucleus accumbens	0.889436108645212
LatentSpace_334	18182	Nucleus accumbens	nucleus accumbens	0.862590554972072
LatentSpace_334	18183	Nucleus accumbens	claustrum	0.88646576788411
LatentSpace_334	19276	Caudoputamen	nucleus accumbens	0.944647458208167
LatentSpace_334	19277	Caudoputamen	nucleus accumbens	0.963400348003729
LatentSpace_334	19278	Caudoputamen	nucleus accumbens	0.917480813780913
LatentSpace_334	19317	Caudoputamen	nucleus accumbens	0.937848292324803
LatentSpace_334	19318	Caudoputamen	nucleus accumbens	0.975938110947472
LatentSpace_334	19319	Caudoputamen	nucleus accumbens	0.978416462183479
LatentSpace_334	19344	Caudoputamen	nucleus accumbens	0.962009174217439
LatentSpace_334	19345	Caudoputamen	nucleus accumbens	0.959202837482972
LatentSpace_334	19359	Caudoputamen	nucleus accumbens	0.900683095854422
LatentSpace_334	19360	Caudoputamen	caudate nucleus	0.962932727055027
LatentSpace_334	19361	Caudoputamen	caudate nucleus	0.96143958946138
LatentSpace_334	19388	Caudoputamen	nucleus accumbens	0.953952298715097
LatentSpace_334	19389	Caudoputamen	nucleus accumbens	0.940260183852728
LatentSpace_334	19402	Caudoputamen	caudate nucleus	0.883819391397756
LatentSpace_334	19403	Caudoputamen	caudate nucleus	0.949915276768107
LatentSpace_334	19404	Caudoputamen	caudate nucleus	0.953334487729655
LatentSpace_334	19433	Caudoputamen	caudate nucleus	0.944675450807575
LatentSpace_334	19434	Caudoputamen	caudate nucleus	0.936548527344568
LatentSpace_334	19435	Caudoputamen	caudate nucleus	0.872748672514444
LatentSpace_334	19448	Caudoputamen	caudate nucleus	0.939589027277232
LatentSpace_334	19449	Caudoputamen	caudate nucleus	0.948056778092701
LatentSpace_334	19450	Caudoputamen	putamen	0.947385628616788
LatentSpace_334	19477	Caudoputamen	caudate nucleus	0.94157135355537
LatentSpace_334	19478	Caudoputamen	caudate nucleus	0.95504267515335
LatentSpace_334	19479	Caudoputamen	caudate nucleus	0.943223917053915
LatentSpace_334	19480	Caudoputamen	caudate nucleus	0.885781239691089
LatentSpace_334	19493	Caudoputamen	caudate nucleus	0.86806796611025
LatentSpace_334	19494	Caudoputamen	caudate nucleus	0.933521167743748
LatentSpace_334	19495	Caudoputamen	caudate nucleus	0.941499175619568
LatentSpace_334	19496	Caudoputamen	putamen	0.943943110075017
LatentSpace_334	19497	Caudoputamen	putamen	0.930514497270976
LatentSpace_334	19522	Caudoputamen	putamen	0.940135843989243
LatentSpace_334	19523	Caudoputamen	caudate nucleus	0.96471480151913
LatentSpace_334	19524	Caudoputamen	caudate nucleus	0.962546184005213
LatentSpace_334	19525	Caudoputamen	caudate nucleus	0.947964706319795
LatentSpace_334	19526	Caudoputamen	caudate nucleus	0.888955784525232
LatentSpace_334	19539	Caudoputamen	caudate nucleus	0.924269051628784
LatentSpace_334	19540	Caudoputamen	caudate nucleus	0.943629386496667
LatentSpace_334	19541	Caudoputamen	putamen	0.947136300812283
LatentSpace_334	19542	Caudoputamen	putamen	0.945909783633451
LatentSpace_334	19569	Caudoputamen	putamen	0.955833015326792
LatentSpace_334	19570	Caudoputamen	caudate nucleus	0.967222224917123
LatentSpace_334	19571	Caudoputamen	caudate nucleus	0.962608133834313
LatentSpace_334	19572	Caudoputamen	caudate nucleus	0.942024024493626
LatentSpace_334	19586	Caudoputamen	caudate nucleus	0.90835582685683
LatentSpace_334	19587	Caudoputamen	caudate nucleus	0.937642392934726
LatentSpace_334	19588	Caudoputamen	caudate nucleus	0.946383458504835
LatentSpace_334	19589	Caudoputamen	putamen	0.952449987073864
LatentSpace_334	19590	Caudoputamen	putamen	0.951771303676574
LatentSpace_334	19615	Caudoputamen	putamen	0.945006906510944
LatentSpace_334	19616	Caudoputamen	caudate nucleus	0.958438744003908
LatentSpace_334	19617	Caudoputamen	caudate nucleus	0.959809780194996
LatentSpace_334	19618	Caudoputamen	caudate nucleus	0.949750276230016
LatentSpace_334	19619	Caudoputamen	caudate nucleus	0.923060309880786
LatentSpace_334	19631	Caudoputamen	caudate nucleus	0.893163309627111
LatentSpace_334	19632	Caudoputamen	caudate nucleus	0.932666947044167
LatentSpace_334	19633	Caudoputamen	caudate nucleus	0.950028092034638
LatentSpace_334	19634	Caudoputamen	caudate nucleus	0.957050785662862
LatentSpace_334	19635	Caudoputamen	putamen	0.961663776563286
LatentSpace_334	19636	Caudoputamen	putamen	0.955366540613929
LatentSpace_334	19656	Caudoputamen	putamen	0.952406380130861
LatentSpace_334	19657	Caudoputamen	putamen	0.960466595968074
LatentSpace_334	19658	Caudoputamen	caudate nucleus	0.958076506987425
LatentSpace_334	19659	Caudoputamen	caudate nucleus	0.95792473232969
LatentSpace_334	19660	Caudoputamen	caudate nucleus	0.948691657900246
LatentSpace_334	19661	Caudoputamen	caudate nucleus	0.907354874772462
LatentSpace_334	19674	Caudoputamen	caudate nucleus	0.837446094579493
LatentSpace_334	19675	Caudoputamen	caudate nucleus	0.920422786429481
LatentSpace_334	19676	Caudoputamen	caudate nucleus	0.949075207393669
LatentSpace_334	19677	Caudoputamen	caudate nucleus	0.959986012525261
LatentSpace_334	19678	Caudoputamen	putamen	0.967510279352505
LatentSpace_334	19679	Caudoputamen	putamen	0.968801079761798
LatentSpace_334	19680	Caudoputamen	putamen	0.963884648801858
LatentSpace_334	19681	Caudoputamen	putamen	0.950347493416104
LatentSpace_334	19694	Caudoputamen	putamen	0.955031914964801
LatentSpace_334	19695	Caudoputamen	putamen	0.967887793580245
LatentSpace_334	19696	Caudoputamen	putamen	0.969116570262767
LatentSpace_334	19697	Caudoputamen	caudate nucleus	0.964316536163404
LatentSpace_334	19698	Caudoputamen	caudate nucleus	0.959500494066652
LatentSpace_334	19699	Caudoputamen	caudate nucleus	0.95415228101056
LatentSpace_334	19700	Caudoputamen	caudate nucleus	0.937257848814201
LatentSpace_334	19714	Caudoputamen	caudate nucleus	0.87653748131321
LatentSpace_334	19715	Caudoputamen	putamen	0.930940492765504
LatentSpace_334	19716	Caudoputamen	caudate nucleus	0.952065977393679
LatentSpace_334	19717	Caudoputamen	caudate nucleus	0.956017056563541
LatentSpace_334	19718	Caudoputamen	putamen	0.956676515654384
LatentSpace_334	19719	Caudoputamen	putamen	0.960940571763594
LatentSpace_334	19720	Caudoputamen	putamen	0.963267359285624
LatentSpace_334	19721	Caudoputamen	putamen	0.966824724946162
LatentSpace_334	19722	Caudoputamen	caudate nucleus	0.970679465496889
LatentSpace_334	19732	Caudoputamen	caudate nucleus	0.971614831434415
LatentSpace_334	19733	Caudoputamen	caudate nucleus	0.976473257196202
LatentSpace_334	19734	Caudoputamen	caudate nucleus	0.974377841794801
LatentSpace_334	19735	Caudoputamen	caudate nucleus	0.972107424155682
LatentSpace_334	19736	Caudoputamen	caudate nucleus	0.970991686123529
LatentSpace_334	19737	Caudoputamen	caudate nucleus	0.964284019873525
LatentSpace_334	19738	Caudoputamen	caudate nucleus	0.957525252821972
LatentSpace_334	19739	Caudoputamen	caudate nucleus	0.945863331502316
LatentSpace_334	19740	Caudoputamen	caudate nucleus	0.912288678833637
LatentSpace_334	19753	Caudoputamen	caudate nucleus	0.851044389379066
LatentSpace_334	19754	Caudoputamen	caudate nucleus	0.921841999394693
LatentSpace_334	19755	Caudoputamen	caudate nucleus	0.947655995764311
LatentSpace_334	19756	Caudoputamen	caudate nucleus	0.956513961734509
LatentSpace_334	19757	Caudoputamen	caudate nucleus	0.956439597766663
LatentSpace_334	19758	Caudoputamen	caudate nucleus	0.959606187295312
LatentSpace_334	19759	Caudoputamen	caudate nucleus	0.964893292609364
LatentSpace_334	19760	Caudoputamen	caudate nucleus	0.97219455511288
LatentSpace_334	19761	Caudoputamen	caudate nucleus	0.979089606224306
LatentSpace_334	19762	Caudoputamen	caudate nucleus	0.983417209009354
LatentSpace_334	19764	Lateral septal complex	septal nuclei	0.926623357688539
LatentSpace_334	19765	Lateral septal complex	septal nuclei	0.931953352315292
LatentSpace_334	19766	Lateral septal complex	septal nuclei	0.929755012115426
LatentSpace_334	19767	Lateral septal complex	septal nuclei	0.924930809869131
LatentSpace_334	19769	Caudoputamen	caudate nucleus	0.981949655999689
LatentSpace_334	19770	Caudoputamen	caudate nucleus	0.985831822933315
LatentSpace_334	19771	Caudoputamen	caudate nucleus	0.985704621271117
LatentSpace_334	19772	Caudoputamen	caudate nucleus	0.982444125573069
LatentSpace_334	19773	Caudoputamen	caudate nucleus	0.978022641806715
LatentSpace_334	19774	Caudoputamen	caudate nucleus	0.974299584452076
LatentSpace_334	19775	Caudoputamen	caudate nucleus	0.966840529368557
LatentSpace_334	19776	Caudoputamen	caudate nucleus	0.956980676095093
LatentSpace_334	19777	Caudoputamen	caudate nucleus	0.935827857230907
LatentSpace_334	19778	Caudoputamen	caudate nucleus	0.865608927953168
LatentSpace_334	19791	Caudoputamen	caudate nucleus	0.911840256195019
LatentSpace_334	19792	Caudoputamen	caudate nucleus	0.947446979301419
LatentSpace_334	19793	Caudoputamen	caudate nucleus	0.959578760502422
LatentSpace_334	19794	Caudoputamen	caudate nucleus	0.964119412418786
LatentSpace_334	19795	Caudoputamen	caudate nucleus	0.969212804904097
LatentSpace_334	19796	Caudoputamen	caudate nucleus	0.970621204036309
LatentSpace_334	19797	Caudoputamen	caudate nucleus	0.973914903421168
LatentSpace_334	19798	Caudoputamen	caudate nucleus	0.980377978459702
LatentSpace_334	19799	Caudoputamen	caudate nucleus	0.987153004134923
LatentSpace_334	19800	Lateral septal complex	septal nuclei	0.9245490031362
LatentSpace_334	19801	Lateral septal complex	septal nuclei	0.92230411612024
LatentSpace_334	19802	Lateral septal complex	septal nuclei	0.917905873512175
LatentSpace_334	19807	Lateral septal complex	septal nuclei	0.925056070157632
LatentSpace_334	19808	Lateral septal complex	septal nuclei	0.923998930317642
LatentSpace_334	19809	Lateral septal complex	septal nuclei	0.911058073866868
LatentSpace_334	19810	Caudoputamen	caudate nucleus	0.982216679500619
LatentSpace_334	19811	Caudoputamen	caudate nucleus	0.987312456527525
LatentSpace_334	19812	Caudoputamen	caudate nucleus	0.98580725552049
LatentSpace_334	19813	Caudoputamen	caudate nucleus	0.98354123045553
LatentSpace_334	19814	Caudoputamen	caudate nucleus	0.981217662492516
LatentSpace_334	19815	Caudoputamen	caudate nucleus	0.977376786756685
LatentSpace_334	19816	Caudoputamen	caudate nucleus	0.973542081970362
LatentSpace_334	19817	Caudoputamen	caudate nucleus	0.964043374809123
LatentSpace_334	19818	Caudoputamen	caudate nucleus	0.947609038079844
LatentSpace_334	19819	Caudoputamen	caudate nucleus	0.906875443540932
LatentSpace_334	19832	Caudoputamen	caudate nucleus	0.848806550924617
LatentSpace_334	19833	Caudoputamen	caudate nucleus	0.925359267863241
LatentSpace_334	19834	Caudoputamen	caudate nucleus	0.954138239645987
LatentSpace_334	19835	Caudoputamen	caudate nucleus	0.967155329750609
LatentSpace_334	19836	Caudoputamen	caudate nucleus	0.974508583905997
LatentSpace_334	19837	Caudoputamen	caudate nucleus	0.976339135452149
LatentSpace_334	19838	Caudoputamen	caudate nucleus	0.980218911815267
LatentSpace_334	19839	Caudoputamen	caudate nucleus	0.98173400834652
LatentSpace_334	19840	Caudoputamen	caudate nucleus	0.985912669691579
LatentSpace_334	19841	Caudoputamen	caudate nucleus	0.987358035743924
LatentSpace_334	19842	Caudoputamen	nucleus accumbens	0.976961382769419
LatentSpace_334	19843	Lateral septal complex	nucleus accumbens	0.9083451048718
LatentSpace_334	19844	Lateral septal complex	septal nuclei	0.923636558452957
LatentSpace_334	19845	Lateral septal complex	septal nuclei	0.914894822657815
LatentSpace_334	19846	Lateral septal complex	septal nuclei	0.927472149302538
LatentSpace_334	19849	Lateral septal complex	septal nuclei	0.930645919799921
LatentSpace_334	19850	Lateral septal complex	septal nuclei	0.917059099471615
LatentSpace_334	19851	Lateral septal complex	septal nuclei	0.921659056360117
LatentSpace_334	19852	Lateral septal complex	nucleus accumbens	0.930355789557107
LatentSpace_334	19853	Caudoputamen	nucleus accumbens	0.983258528031244
LatentSpace_334	19854	Caudoputamen	caudate nucleus	0.988086335623021
LatentSpace_334	19855	Caudoputamen	caudate nucleus	0.986864995384522
LatentSpace_334	19856	Caudoputamen	caudate nucleus	0.982198774077383
LatentSpace_334	19857	Caudoputamen	caudate nucleus	0.981235908046087
LatentSpace_334	19858	Caudoputamen	caudate nucleus	0.980562283417065
LatentSpace_334	19859	Caudoputamen	caudate nucleus	0.97684906662984
LatentSpace_334	19860	Caudoputamen	caudate nucleus	0.971200267370053
LatentSpace_334	19861	Caudoputamen	caudate nucleus	0.958821517169572
LatentSpace_334	19862	Caudoputamen	caudate nucleus	0.930133182670467
LatentSpace_334	19863	Caudoputamen	caudate nucleus	0.841459484711038
LatentSpace_334	19876	Caudoputamen	caudate nucleus	0.872182034623037
LatentSpace_334	19877	Caudoputamen	caudate nucleus	0.942047064486853
LatentSpace_334	19878	Caudoputamen	caudate nucleus	0.964560707205303
LatentSpace_334	19879	Caudoputamen	caudate nucleus	0.976865529678909
LatentSpace_334	19880	Caudoputamen	caudate nucleus	0.980212611267305
LatentSpace_334	19881	Caudoputamen	caudate nucleus	0.984796759993646
LatentSpace_334	19882	Caudoputamen	caudate nucleus	0.986075706755411
LatentSpace_334	19883	Caudoputamen	caudate nucleus	0.98675687936661
LatentSpace_334	19884	Caudoputamen	caudate nucleus	0.988230502685257
LatentSpace_334	19885	Caudoputamen	nucleus accumbens	0.976607369193803
LatentSpace_334	19886	Lateral septal complex	nucleus accumbens	0.940868166622455
LatentSpace_334	19887	Lateral septal complex	septal nuclei	0.914505044186555
LatentSpace_334	19888	Lateral septal complex	septal nuclei	0.904341412563177
LatentSpace_334	19889	Lateral septal complex	septal nuclei	0.914224420723815
LatentSpace_334	19892	Lateral septal complex	septal nuclei	0.921242880843817
LatentSpace_334	19893	Lateral septal complex	septal nuclei	0.91029823999782
LatentSpace_334	19894	Lateral septal complex	septal nuclei	0.907502792030825
LatentSpace_334	19895	Caudoputamen	nucleus accumbens	0.98270162429384
LatentSpace_334	19896	Caudoputamen	caudate nucleus	0.987185557671817
LatentSpace_334	19897	Caudoputamen	caudate nucleus	0.98757831486495
LatentSpace_334	19898	Caudoputamen	caudate nucleus	0.984357864522889
LatentSpace_334	19899	Caudoputamen	caudate nucleus	0.981774414460233
LatentSpace_334	19900	Caudoputamen	caudate nucleus	0.97930951096362
LatentSpace_334	19901	Caudoputamen	caudate nucleus	0.97543821457369
LatentSpace_334	19902	Caudoputamen	caudate nucleus	0.968400569646536
LatentSpace_334	19903	Caudoputamen	caudate nucleus	0.950556029706729
LatentSpace_334	19904	Caudoputamen	caudate nucleus	0.884996859299549
LatentSpace_334	19917	Caudoputamen	caudate nucleus	0.888274605099203
LatentSpace_334	19918	Caudoputamen	caudate nucleus	0.952383523330605
LatentSpace_334	19919	Caudoputamen	caudate nucleus	0.976062286967076
LatentSpace_334	19920	Caudoputamen	caudate nucleus	0.983877101544648
LatentSpace_334	19921	Caudoputamen	caudate nucleus	0.98757995319339
LatentSpace_334	19922	Caudoputamen	caudate nucleus	0.987552004595677
LatentSpace_334	19923	Caudoputamen	caudate nucleus	0.987050102235182
LatentSpace_334	19924	Caudoputamen	caudate nucleus	0.986896640673841
LatentSpace_334	19925	Caudoputamen	nucleus accumbens	0.980294199996177
LatentSpace_334	19926	Lateral septal complex	septal nuclei	0.902529757260879
LatentSpace_334	19927	Lateral septal complex	septal nuclei	0.894986665808123
LatentSpace_334	19928	Lateral septal complex	septal nuclei	0.900140654931834
LatentSpace_334	19929	Lateral septal complex	septal nuclei	0.919810443060441
LatentSpace_334	19930	Lateral septal complex	septal nuclei	0.918629576602065
LatentSpace_334	19931	Lateral septal complex	septal nuclei	0.898393150100296
LatentSpace_334	19932	Lateral septal complex	septal nuclei	0.895401363533776
LatentSpace_334	19933	Lateral septal complex	nucleus accumbens	0.899319869878341
LatentSpace_334	19934	Caudoputamen	nucleus accumbens	0.971194546169398
LatentSpace_334	19935	Caudoputamen	nucleus accumbens	0.982528977235694
LatentSpace_334	19936	Caudoputamen	caudate nucleus	0.983146593684624
LatentSpace_334	19937	Caudoputamen	caudate nucleus	0.98612804903067
LatentSpace_334	19938	Caudoputamen	caudate nucleus	0.984723916682844
LatentSpace_334	19939	Caudoputamen	caudate nucleus	0.982418447833073
LatentSpace_334	19940	Caudoputamen	caudate nucleus	0.979119172232063
LatentSpace_334	19941	Caudoputamen	caudate nucleus	0.970971949729942
LatentSpace_334	19942	Caudoputamen	caudate nucleus	0.948740698710709
LatentSpace_334	19943	Caudoputamen	caudate nucleus	0.870185378066808
LatentSpace_334	19957	Caudoputamen	caudate nucleus	0.879250842048705
LatentSpace_334	19958	Caudoputamen	caudate nucleus	0.949589124410014
LatentSpace_334	19959	Caudoputamen	caudate nucleus	0.974905483559773
LatentSpace_334	19960	Caudoputamen	caudate nucleus	0.982476216551651
LatentSpace_334	19961	Caudoputamen	caudate nucleus	0.984552567783219
LatentSpace_334	19962	Caudoputamen	caudate nucleus	0.984723805552077
LatentSpace_334	19963	Caudoputamen	caudate nucleus	0.985364755424208
LatentSpace_334	19964	Caudoputamen	nucleus accumbens	0.97924881330539
LatentSpace_334	19965	Caudoputamen	nucleus accumbens	0.970091411440973
LatentSpace_334	19966	Lateral septal complex	nucleus accumbens	0.901554027077748
LatentSpace_334	19967	Lateral septal complex	amygdala	0.892705558032275
LatentSpace_334	19968	Lateral septal complex	amygdala	0.900780876679688
LatentSpace_334	19969	Lateral septal complex	amygdala	0.882638485052231
LatentSpace_334	19970	Lateral septal complex	amygdala	0.883097147680911
LatentSpace_334	19971	Lateral septal complex	amygdala	0.897213499586482
LatentSpace_334	19972	Lateral septal complex	amygdala	0.891825887638438
LatentSpace_334	19973	Lateral septal complex	nucleus accumbens	0.912316571129578
LatentSpace_334	19974	Caudoputamen	nucleus accumbens	0.97341151993751
LatentSpace_334	19975	Caudoputamen	nucleus accumbens	0.977593051857306
LatentSpace_334	19976	Caudoputamen	caudate nucleus	0.982066987441991
LatentSpace_334	19977	Caudoputamen	caudate nucleus	0.983383393411581
LatentSpace_334	19978	Caudoputamen	caudate nucleus	0.981943326767501
LatentSpace_334	19979	Caudoputamen	caudate nucleus	0.976596455899458
LatentSpace_334	19980	Caudoputamen	caudate nucleus	0.965506407013183
LatentSpace_334	19981	Caudoputamen	caudate nucleus	0.931591479024664
LatentSpace_334	19997	Caudoputamen	claustrum	0.851775071276971
LatentSpace_334	19998	Caudoputamen	caudate nucleus	0.91541207865938
LatentSpace_334	19999	Caudoputamen	caudate nucleus	0.948535033369334
LatentSpace_334	20000	Caudoputamen	caudate nucleus	0.964583751263934
LatentSpace_334	20001	Caudoputamen	caudate nucleus	0.972609801077661
LatentSpace_334	20002	Caudoputamen	caudate nucleus	0.975951430185004
LatentSpace_334	20003	Caudoputamen	nucleus accumbens	0.98010965563555
LatentSpace_334	20004	Caudoputamen	nucleus accumbens	0.971505693489321
LatentSpace_334	20011	Caudoputamen	nucleus accumbens	0.962342245041631
LatentSpace_334	20012	Caudoputamen	nucleus accumbens	0.972609130600971
LatentSpace_334	20013	Caudoputamen	caudate nucleus	0.970399351906934
LatentSpace_334	20014	Caudoputamen	caudate nucleus	0.96729689712668
LatentSpace_334	20015	Caudoputamen	caudate nucleus	0.960117120278668
LatentSpace_334	20016	Caudoputamen	caudate nucleus	0.934217918114559
LatentSpace_334	20017	Caudoputamen	caudate nucleus	0.884862900128406
LatentSpace_334	20034	Caudoputamen	claustrum	0.859963882216201
LatentSpace_334	20035	Caudoputamen	caudate nucleus	0.911431138689932
LatentSpace_334	20036	Caudoputamen	caudate nucleus	0.939493768890346
LatentSpace_334	20037	Caudoputamen	nucleus accumbens	0.954072507978223
LatentSpace_334	20038	Caudoputamen	nucleus accumbens	0.968292126422229
LatentSpace_334	20039	Nucleus accumbens	nucleus accumbens	0.950643811887101
LatentSpace_334	20040	Nucleus accumbens	amygdala	0.890938308115418
LatentSpace_334	20046	Nucleus accumbens	nucleus accumbens	0.94077469950939
LatentSpace_334	20047	Caudoputamen	nucleus accumbens	0.952389069318986
LatentSpace_334	20048	Caudoputamen	nucleus accumbens	0.943021846759605
LatentSpace_334	20049	Caudoputamen	nucleus accumbens	0.918805170491559
LatentSpace_334	20050	Caudoputamen	nucleus accumbens	0.885524890704071
LatentSpace_334	20069	Nucleus accumbens	claustrum	0.906498155850093
LatentSpace_334	20070	Nucleus accumbens	claustrum	0.860003845596967
LatentSpace_334	20071	Nucleus accumbens	nucleus accumbens	0.883083339793392
LatentSpace_334	20072	Nucleus accumbens	nucleus accumbens	0.907262789409219
LatentSpace_334	20081	Nucleus accumbens	nucleus accumbens	0.872743830694865
LatentSpace_334	20082	Nucleus accumbens	nucleus accumbens	0.85030960590991
LatentSpace_334	20083	Nucleus accumbens	claustrum	0.873971208465332
LatentSpace_334	21195	Caudoputamen	nucleus accumbens	0.961980458889175
LatentSpace_334	21196	Caudoputamen	nucleus accumbens	0.955276650978015
LatentSpace_334	21225	Caudoputamen	nucleus accumbens	0.958996348688735
LatentSpace_334	21226	Caudoputamen	nucleus accumbens	0.957213622025641
LatentSpace_334	21238	Caudoputamen	claustrum	0.853759031440575
LatentSpace_334	21239	Caudoputamen	caudate nucleus	0.961962478339357
LatentSpace_334	21240	Caudoputamen	caudate nucleus	0.974575301649939
LatentSpace_334	21269	Caudoputamen	nucleus accumbens	0.967993719512822
LatentSpace_334	21270	Caudoputamen	nucleus accumbens	0.937494453838333
LatentSpace_334	21282	Caudoputamen	caudate nucleus	0.936403853442318
LatentSpace_334	21283	Caudoputamen	caudate nucleus	0.973988884389786
LatentSpace_334	21284	Caudoputamen	caudate nucleus	0.966231444915194
LatentSpace_334	21313	Caudoputamen	nucleus accumbens	0.951753120965996
LatentSpace_334	21314	Caudoputamen	caudate nucleus	0.954655596610996
LatentSpace_334	21315	Caudoputamen	caudate nucleus	0.913167555064071
LatentSpace_334	21326	Caudoputamen	caudate nucleus	0.906068922407995
LatentSpace_334	21327	Caudoputamen	caudate nucleus	0.954038048901234
LatentSpace_334	21328	Caudoputamen	putamen	0.956136075042063
LatentSpace_334	21357	Caudoputamen	caudate nucleus	0.953318063496226
LatentSpace_334	21358	Caudoputamen	caudate nucleus	0.948263216718759
LatentSpace_334	21359	Caudoputamen	caudate nucleus	0.894566938609968
LatentSpace_334	21372	Caudoputamen	caudate nucleus	0.879103947411586
LatentSpace_334	21373	Caudoputamen	caudate nucleus	0.931997298091439
LatentSpace_334	21374	Caudoputamen	putamen	0.944021461723647
LatentSpace_334	21375	Caudoputamen	putamen	0.948477880101292
LatentSpace_334	21404	Caudoputamen	putamen	0.94995906892131
LatentSpace_334	21405	Caudoputamen	caudate nucleus	0.959258490944976
LatentSpace_334	21406	Caudoputamen	caudate nucleus	0.947495915963114
LatentSpace_334	21407	Caudoputamen	caudate nucleus	0.896805506306528
LatentSpace_334	21408	Caudoputamen	claustrum	0.80610793806433
LatentSpace_334	21419	Caudoputamen	caudate nucleus	0.866719852230909
LatentSpace_334	21420	Caudoputamen	caudate nucleus	0.927991275183391
LatentSpace_334	21421	Caudoputamen	putamen	0.940434946066195
LatentSpace_334	21422	Caudoputamen	putamen	0.942071919089557
LatentSpace_334	21423	Caudoputamen	putamen	0.927027960528371
LatentSpace_334	21450	Caudoputamen	putamen	0.948669351688708
LatentSpace_334	21451	Caudoputamen	caudate nucleus	0.965715161342845
LatentSpace_334	21452	Caudoputamen	caudate nucleus	0.964038636100362
LatentSpace_334	21453	Caudoputamen	caudate nucleus	0.94647859607417
LatentSpace_334	21454	Caudoputamen	caudate nucleus	0.89136003279717
LatentSpace_334	21466	Caudoputamen	caudate nucleus	0.920220476483464
LatentSpace_334	21467	Caudoputamen	caudate nucleus	0.941441337149387
LatentSpace_334	21468	Caudoputamen	putamen	0.946662256811756
LatentSpace_334	21469	Caudoputamen	putamen	0.945702430834607
LatentSpace_334	21470	Caudoputamen	putamen	0.917565823496408
LatentSpace_334	21495	Caudoputamen	caudate nucleus	0.958580906602692
LatentSpace_334	21496	Caudoputamen	caudate nucleus	0.967904104959501
LatentSpace_334	21497	Caudoputamen	caudate nucleus	0.959554581013926
LatentSpace_334	21498	Caudoputamen	caudate nucleus	0.940415799232176
LatentSpace_334	21499	Caudoputamen	caudate nucleus	0.873323840753116
LatentSpace_334	21513	Caudoputamen	caudate nucleus	0.9083248864189
LatentSpace_334	21514	Caudoputamen	caudate nucleus	0.938246584087139
LatentSpace_334	21515	Caudoputamen	caudate nucleus	0.947342674185038
LatentSpace_334	21516	Caudoputamen	putamen	0.95379185729769
LatentSpace_334	21517	Caudoputamen	putamen	0.954877037413936
LatentSpace_334	21518	Caudoputamen	putamen	0.906898817707179
LatentSpace_334	21542	Caudoputamen	putamen	0.95131823056507
LatentSpace_334	21543	Caudoputamen	caudate nucleus	0.960035594624914
LatentSpace_334	21544	Caudoputamen	caudate nucleus	0.958735415196367
LatentSpace_334	21545	Caudoputamen	caudate nucleus	0.949157460497809
LatentSpace_334	21546	Caudoputamen	caudate nucleus	0.91942478954707
LatentSpace_334	21547	Caudoputamen	caudate nucleus	0.825433929032229
LatentSpace_334	21560	Caudoputamen	caudate nucleus	0.885096449115133
LatentSpace_334	21561	Caudoputamen	caudate nucleus	0.930813892499468
LatentSpace_334	21562	Caudoputamen	caudate nucleus	0.951461782143956
LatentSpace_334	21563	Caudoputamen	putamen	0.959144367725272
LatentSpace_334	21564	Caudoputamen	putamen	0.967258450217979
LatentSpace_334	21565	Caudoputamen	putamen	0.960720276661845
LatentSpace_334	21584	Caudoputamen	putamen	0.957268330343153
LatentSpace_334	21585	Caudoputamen	caudate nucleus	0.961239638359367
LatentSpace_334	21586	Caudoputamen	caudate nucleus	0.95953009925671
LatentSpace_334	21587	Caudoputamen	caudate nucleus	0.957444420107575
LatentSpace_334	21588	Caudoputamen	caudate nucleus	0.945392621635717
LatentSpace_334	21589	Caudoputamen	caudate nucleus	0.900651816045218
LatentSpace_334	21602	Caudoputamen	caudate nucleus	0.916825086240303
LatentSpace_334	21603	Caudoputamen	putamen	0.94448166088315
LatentSpace_334	21604	Caudoputamen	putamen	0.959984960073317
LatentSpace_334	21605	Caudoputamen	putamen	0.969842845846883
LatentSpace_334	21606	Caudoputamen	putamen	0.970035903356539
LatentSpace_334	21607	Caudoputamen	putamen	0.96624543087932
LatentSpace_334	21608	Caudoputamen	putamen	0.956135370893505
LatentSpace_334	21620	Caudoputamen	putamen	0.964533969076316
LatentSpace_334	21621	Caudoputamen	putamen	0.969656624289692
LatentSpace_334	21622	Caudoputamen	putamen	0.967921066992724
LatentSpace_334	21623	Caudoputamen	caudate nucleus	0.963897565415496
LatentSpace_334	21624	Caudoputamen	caudate nucleus	0.960359240054425
LatentSpace_334	21625	Caudoputamen	caudate nucleus	0.955399378440168
LatentSpace_334	21626	Caudoputamen	caudate nucleus	0.935397960980276
LatentSpace_334	21627	Caudoputamen	caudate nucleus	0.86392626420094
LatentSpace_334	21640	Caudoputamen	putamen	0.877738435104297
LatentSpace_334	21641	Caudoputamen	putamen	0.927430852296189
LatentSpace_334	21642	Caudoputamen	putamen	0.949542734702229
LatentSpace_334	21643	Caudoputamen	putamen	0.955412052163258
LatentSpace_334	21644	Caudoputamen	putamen	0.959331691081688
LatentSpace_334	21645	Caudoputamen	putamen	0.962921316726444
LatentSpace_334	21646	Caudoputamen	putamen	0.964132661362531
LatentSpace_334	21647	Caudoputamen	putamen	0.969182952406964
LatentSpace_334	21648	Caudoputamen	caudate nucleus	0.974214370389885
LatentSpace_334	21650	Lateral septal complex	septal nuclei	0.929536377825561
LatentSpace_334	21651	Lateral septal complex	septal nuclei	0.927573317046587
LatentSpace_334	21653	Caudoputamen	caudate nucleus	0.977018629114358
LatentSpace_334	21654	Caudoputamen	caudate nucleus	0.97729134387547
LatentSpace_334	21655	Caudoputamen	caudate nucleus	0.974650799540613
LatentSpace_334	21656	Caudoputamen	caudate nucleus	0.971990024412844
LatentSpace_334	21657	Caudoputamen	caudate nucleus	0.969819161379505
LatentSpace_334	21658	Caudoputamen	caudate nucleus	0.963927386650581
LatentSpace_334	21659	Caudoputamen	caudate nucleus	0.956574274419429
LatentSpace_334	21660	Caudoputamen	caudate nucleus	0.945734337405841
LatentSpace_334	21661	Caudoputamen	caudate nucleus	0.911999137253719
LatentSpace_334	21674	Caudoputamen	caudate nucleus	0.852914732571532
LatentSpace_334	21675	Caudoputamen	putamen	0.917047979044554
LatentSpace_334	21676	Caudoputamen	putamen	0.944807864448269
LatentSpace_334	21677	Caudoputamen	putamen	0.953822584792922
LatentSpace_334	21678	Caudoputamen	caudate nucleus	0.958340632844101
LatentSpace_334	21679	Caudoputamen	caudate nucleus	0.961187428762728
LatentSpace_334	21680	Caudoputamen	caudate nucleus	0.963705279778139
LatentSpace_334	21681	Caudoputamen	caudate nucleus	0.973113490799299
LatentSpace_334	21682	Caudoputamen	caudate nucleus	0.980045018331974
LatentSpace_334	21683	Caudoputamen	caudate nucleus	0.98621580763492
LatentSpace_334	21684	Lateral septal complex	septal nuclei	0.916516918909426
LatentSpace_334	21685	Lateral septal complex	septal nuclei	0.918371279443532
LatentSpace_334	21686	Lateral septal complex	septal nuclei	0.923671683688431
LatentSpace_334	21687	Lateral septal complex	septal nuclei	0.923850345356215
LatentSpace_334	21688	Lateral septal complex	septal nuclei	0.917130958202696
LatentSpace_334	21689	Lateral septal complex	septal nuclei	0.906515947189161
LatentSpace_334	21691	Caudoputamen	caudate nucleus	0.9867704359416
LatentSpace_334	21692	Caudoputamen	caudate nucleus	0.986954916038035
LatentSpace_334	21693	Caudoputamen	caudate nucleus	0.985017652569845
LatentSpace_334	21694	Caudoputamen	caudate nucleus	0.981685462752042
LatentSpace_334	21695	Caudoputamen	caudate nucleus	0.976023350316172
LatentSpace_334	21696	Caudoputamen	caudate nucleus	0.972112292480725
LatentSpace_334	21697	Caudoputamen	caudate nucleus	0.966668982404972
LatentSpace_334	21698	Caudoputamen	caudate nucleus	0.954626794171049
LatentSpace_334	21699	Caudoputamen	caudate nucleus	0.936022248199083
LatentSpace_334	21700	Caudoputamen	caudate nucleus	0.870637800694054
LatentSpace_334	21713	Caudoputamen	caudate nucleus	0.910634881994833
LatentSpace_334	21714	Caudoputamen	caudate nucleus	0.945803825236471
LatentSpace_334	21715	Caudoputamen	caudate nucleus	0.959008697859199
LatentSpace_334	21716	Caudoputamen	caudate nucleus	0.964087989381618
LatentSpace_334	21717	Caudoputamen	caudate nucleus	0.966200162827077
LatentSpace_334	21718	Caudoputamen	caudate nucleus	0.964702567734896
LatentSpace_334	21719	Caudoputamen	caudate nucleus	0.969427075088503
LatentSpace_334	21720	Caudoputamen	caudate nucleus	0.976853910116705
LatentSpace_334	21721	Caudoputamen	caudate nucleus	0.985791247653473
LatentSpace_334	21722	Caudoputamen	caudate nucleus	0.986742036054
LatentSpace_334	21723	Caudoputamen	nucleus accumbens	0.972127823721931
LatentSpace_334	21724	Lateral septal complex	septal nuclei	0.904244456043547
LatentSpace_334	21725	Lateral septal complex	septal nuclei	0.912484023242616
LatentSpace_334	21726	Lateral septal complex	septal nuclei	0.906633096190888
LatentSpace_334	21727	Lateral septal complex	septal nuclei	0.917132819979889
LatentSpace_334	21728	Lateral septal complex	septal nuclei	0.93025012775363
LatentSpace_334	21729	Lateral septal complex	septal nuclei	0.916247418932649
LatentSpace_334	21730	Lateral septal complex	septal nuclei	0.914307467949217
LatentSpace_334	21731	Lateral septal complex	nucleus accumbens	0.91423596424721
LatentSpace_334	21732	Caudoputamen	nucleus accumbens	0.978133126319288
LatentSpace_334	21733	Caudoputamen	caudate nucleus	0.986600074711789
LatentSpace_334	21734	Caudoputamen	caudate nucleus	0.987171461685937
LatentSpace_334	21735	Caudoputamen	caudate nucleus	0.984730703438405
LatentSpace_334	21736	Caudoputamen	caudate nucleus	0.982523462407304
LatentSpace_334	21737	Caudoputamen	caudate nucleus	0.980666592154667
LatentSpace_334	21738	Caudoputamen	caudate nucleus	0.97608904409503
LatentSpace_334	21739	Caudoputamen	caudate nucleus	0.970287480361761
LatentSpace_334	21740	Caudoputamen	caudate nucleus	0.9597357020688
LatentSpace_334	21741	Caudoputamen	caudate nucleus	0.94645070302536
LatentSpace_334	21742	Caudoputamen	caudate nucleus	0.908339388486582
LatentSpace_334	21756	Caudoputamen	caudate nucleus	0.848475688025425
LatentSpace_334	21757	Caudoputamen	caudate nucleus	0.92723307544847
LatentSpace_334	21758	Caudoputamen	caudate nucleus	0.956831756032132
LatentSpace_334	21759	Caudoputamen	caudate nucleus	0.968659231377974
LatentSpace_334	21760	Caudoputamen	caudate nucleus	0.973204834132562
LatentSpace_334	21761	Caudoputamen	caudate nucleus	0.970339423385478
LatentSpace_334	21762	Caudoputamen	caudate nucleus	0.975613424033832
LatentSpace_334	21763	Caudoputamen	caudate nucleus	0.978694595392199
LatentSpace_334	21764	Caudoputamen	caudate nucleus	0.984084756640566
LatentSpace_334	21765	Caudoputamen	caudate nucleus	0.988167556710887
LatentSpace_334	21766	Caudoputamen	nucleus accumbens	0.973934190003179
LatentSpace_334	21767	Lateral septal complex	nucleus accumbens	0.924917328337916
LatentSpace_334	21768	Lateral septal complex	septal nuclei	0.916562601212339
LatentSpace_334	21769	Lateral septal complex	septal nuclei	0.909920502398949
LatentSpace_334	21770	Lateral septal complex	septal nuclei	0.920879607076003
LatentSpace_334	21773	Lateral septal complex	septal nuclei	0.925522529349109
LatentSpace_334	21774	Lateral septal complex	septal nuclei	0.910386642995974
LatentSpace_334	21775	Lateral septal complex	septal nuclei	0.91317594921144
LatentSpace_334	21776	Caudoputamen	nucleus accumbens	0.978739977675174
LatentSpace_334	21777	Caudoputamen	caudate nucleus	0.98869583231449
LatentSpace_334	21778	Caudoputamen	caudate nucleus	0.984602020316831
LatentSpace_334	21779	Caudoputamen	caudate nucleus	0.981366574515762
LatentSpace_334	21780	Caudoputamen	caudate nucleus	0.982007893274854
LatentSpace_334	21781	Caudoputamen	caudate nucleus	0.98176636031005
LatentSpace_334	21782	Caudoputamen	caudate nucleus	0.977563769618454
LatentSpace_334	21783	Caudoputamen	caudate nucleus	0.970377681529239
LatentSpace_334	21784	Caudoputamen	caudate nucleus	0.96028006435188
LatentSpace_334	21785	Caudoputamen	caudate nucleus	0.933919682485812
LatentSpace_334	21786	Caudoputamen	caudate nucleus	0.846164508219384
LatentSpace_334	21799	Caudoputamen	caudate nucleus	0.886366988377868
LatentSpace_334	21800	Caudoputamen	caudate nucleus	0.950569402113627
LatentSpace_334	21801	Caudoputamen	caudate nucleus	0.967532612714978
LatentSpace_334	21802	Caudoputamen	caudate nucleus	0.975222956585865
LatentSpace_334	21803	Caudoputamen	caudate nucleus	0.976850667693174
LatentSpace_334	21804	Caudoputamen	caudate nucleus	0.981273796030729
LatentSpace_334	21805	Caudoputamen	caudate nucleus	0.983682949615101
LatentSpace_334	21806	Caudoputamen	caudate nucleus	0.986334938930482
LatentSpace_334	21807	Caudoputamen	caudate nucleus	0.988825922226007
LatentSpace_334	21808	Caudoputamen	caudate nucleus	0.978641806162452
LatentSpace_334	21809	Lateral septal complex	septal nuclei	0.906712497808373
LatentSpace_334	21810	Lateral septal complex	septal nuclei	0.9029015747367
LatentSpace_334	21811	Lateral septal complex	septal nuclei	0.908133239140774
LatentSpace_334	21814	Lateral septal complex	septal nuclei	0.908484663201781
LatentSpace_334	21815	Lateral septal complex	septal nuclei	0.904737718274977
LatentSpace_334	21816	Lateral septal complex	septal nuclei	0.901635482250121
LatentSpace_334	21817	Caudoputamen	caudate nucleus	0.979228564417102
LatentSpace_334	21818	Caudoputamen	caudate nucleus	0.988085681558232
LatentSpace_334	21819	Caudoputamen	caudate nucleus	0.987054944152225
LatentSpace_334	21820	Caudoputamen	caudate nucleus	0.983099383673735
LatentSpace_334	21821	Caudoputamen	caudate nucleus	0.982613377427324
LatentSpace_334	21822	Caudoputamen	caudate nucleus	0.979967063770241
LatentSpace_334	21823	Caudoputamen	caudate nucleus	0.977067583143555
LatentSpace_334	21824	Caudoputamen	caudate nucleus	0.970786385344836
LatentSpace_334	21825	Caudoputamen	caudate nucleus	0.955082375961993
LatentSpace_334	21826	Caudoputamen	caudate nucleus	0.89426708127576
LatentSpace_334	21840	Caudoputamen	caudate nucleus	0.904749311530315
LatentSpace_334	21841	Caudoputamen	caudate nucleus	0.952846708243672
LatentSpace_334	21842	Caudoputamen	caudate nucleus	0.972846921336223
LatentSpace_334	21843	Caudoputamen	caudate nucleus	0.982148172934293
LatentSpace_334	21844	Caudoputamen	caudate nucleus	0.984411716045043
LatentSpace_334	21845	Caudoputamen	caudate nucleus	0.987045505072536
LatentSpace_334	21846	Caudoputamen	caudate nucleus	0.987506987633266
LatentSpace_334	21847	Caudoputamen	caudate nucleus	0.987753516259625
LatentSpace_334	21848	Caudoputamen	caudate nucleus	0.978985475911364
LatentSpace_334	21849	Caudoputamen	nucleus accumbens	0.966915020693475
LatentSpace_334	21850	Lateral septal complex	septal nuclei	0.898279988320334
LatentSpace_334	21851	Lateral septal complex	septal nuclei	0.89249854055584
LatentSpace_334	21852	Lateral septal complex	septal nuclei	0.890977891007204
LatentSpace_334	21854	Lateral septal complex	septal nuclei	0.895219637587735
LatentSpace_334	21855	Lateral septal complex	septal nuclei	0.88307760340282
LatentSpace_334	21856	Lateral septal complex	septal nuclei	0.891978875618257
LatentSpace_334	21857	Lateral septal complex	nucleus accumbens	0.901507793701161
LatentSpace_334	21858	Caudoputamen	nucleus accumbens	0.973702916601652
LatentSpace_334	21859	Caudoputamen	nucleus accumbens	0.978093175216619
LatentSpace_334	21860	Caudoputamen	caudate nucleus	0.985639158244494
LatentSpace_334	21861	Caudoputamen	caudate nucleus	0.98684315107411
LatentSpace_334	21862	Caudoputamen	caudate nucleus	0.984595007038906
LatentSpace_334	21863	Caudoputamen	caudate nucleus	0.982604111003726
LatentSpace_334	21864	Caudoputamen	caudate nucleus	0.978634521224751
LatentSpace_334	21865	Caudoputamen	caudate nucleus	0.974233799246037
LatentSpace_334	21866	Caudoputamen	caudate nucleus	0.954029579506418
LatentSpace_334	21882	Caudoputamen	caudate nucleus	0.887809665167079
LatentSpace_334	21883	Caudoputamen	caudate nucleus	0.953151981144168
LatentSpace_334	21884	Caudoputamen	caudate nucleus	0.975017467970964
LatentSpace_334	21885	Caudoputamen	caudate nucleus	0.980665007743978
LatentSpace_334	21886	Caudoputamen	caudate nucleus	0.984302373005354
LatentSpace_334	21887	Caudoputamen	caudate nucleus	0.985062995865319
LatentSpace_334	21888	Caudoputamen	caudate nucleus	0.985868422556491
LatentSpace_334	21889	Caudoputamen	caudate nucleus	0.97897687753935
LatentSpace_334	21890	Caudoputamen	nucleus accumbens	0.971698796177583
LatentSpace_334	21891	Lateral septal complex	nucleus accumbens	0.900731189837419
LatentSpace_334	21892	Lateral septal complex	amygdala	0.906105848837787
LatentSpace_334	21893	Lateral septal complex	amygdala	0.913693570102788
LatentSpace_334	21894	Lateral septal complex	amygdala	0.904176366822699
LatentSpace_334	21895	Lateral septal complex	amygdala	0.903357081975448
LatentSpace_334	21896	Lateral septal complex	amygdala	0.90862444022175
LatentSpace_334	21897	Lateral septal complex	amygdala	0.902071456863808
LatentSpace_334	21898	Lateral septal complex	nucleus accumbens	0.912824828095736
LatentSpace_334	21899	Caudoputamen	nucleus accumbens	0.97625748150556
LatentSpace_334	21900	Caudoputamen	caudate nucleus	0.978753549003218
LatentSpace_334	21901	Caudoputamen	caudate nucleus	0.984705509978482
LatentSpace_334	21902	Caudoputamen	caudate nucleus	0.984654891385364
LatentSpace_334	21903	Caudoputamen	caudate nucleus	0.983407764189166
LatentSpace_334	21904	Caudoputamen	caudate nucleus	0.978333642910083
LatentSpace_334	21905	Caudoputamen	caudate nucleus	0.965938651516585
LatentSpace_334	21906	Caudoputamen	caudate nucleus	0.935657133055763
LatentSpace_334	21907	Caudoputamen	caudate nucleus	0.84355698753619
LatentSpace_334	21922	Caudoputamen	caudate nucleus	0.832714261362928
LatentSpace_334	21923	Caudoputamen	caudate nucleus	0.912226928919204
LatentSpace_334	21924	Caudoputamen	caudate nucleus	0.947391500009447
LatentSpace_334	21925	Caudoputamen	caudate nucleus	0.964348678398567
LatentSpace_334	21926	Caudoputamen	caudate nucleus	0.974678855120761
LatentSpace_334	21927	Caudoputamen	caudate nucleus	0.979470303047708
LatentSpace_334	21928	Caudoputamen	caudate nucleus	0.975722436919378
LatentSpace_334	21929	Caudoputamen	nucleus accumbens	0.966617473825759
LatentSpace_334	21936	Caudoputamen	nucleus accumbens	0.965110642461519
LatentSpace_334	21937	Caudoputamen	nucleus accumbens	0.968906753711862
LatentSpace_334	21938	Caudoputamen	caudate nucleus	0.974061600775368
LatentSpace_334	21939	Caudoputamen	caudate nucleus	0.972237293627485
LatentSpace_334	21940	Caudoputamen	caudate nucleus	0.964929270275168
LatentSpace_334	21941	Caudoputamen	caudate nucleus	0.94600550326611
LatentSpace_334	21942	Caudoputamen	caudate nucleus	0.896947732051607
LatentSpace_334	21960	Caudoputamen	caudate nucleus	0.896230379124723
LatentSpace_334	21961	Caudoputamen	caudate nucleus	0.930062484557318
LatentSpace_334	21962	Caudoputamen	caudate nucleus	0.945121638885572
LatentSpace_334	21963	Caudoputamen	nucleus accumbens	0.951518122931631
LatentSpace_334	21964	Caudoputamen	nucleus accumbens	0.937396133038978
LatentSpace_334	21971	Caudoputamen	nucleus accumbens	0.926795648630544
LatentSpace_334	21972	Caudoputamen	nucleus accumbens	0.931457686251749
LatentSpace_334	21973	Caudoputamen	caudate nucleus	0.929178476323871
LatentSpace_334	21974	Caudoputamen	caudate nucleus	0.919878631908202
LatentSpace_334	21975	Caudoputamen	caudate nucleus	0.890829903823126
LatentSpace_334	23077	Caudoputamen	CA4 field	0.880948452920017
LatentSpace_334	23113	Caudoputamen	nucleus accumbens	0.912898328707691
LatentSpace_334	23114	Caudoputamen	caudate nucleus	0.964907273269468
LatentSpace_334	23115	Caudoputamen	nucleus accumbens	0.941160896543827
LatentSpace_334	23144	Caudoputamen	nucleus accumbens	0.967537131146298
LatentSpace_334	23157	Caudoputamen	caudate nucleus	0.862813771036356
LatentSpace_334	23158	Caudoputamen	caudate nucleus	0.974239718064184
LatentSpace_334	23159	Caudoputamen	caudate nucleus	0.978886906123218
LatentSpace_334	23189	Caudoputamen	caudate nucleus	0.964122591932587
LatentSpace_334	23190	Caudoputamen	caudate nucleus	0.954819515764229
LatentSpace_334	23201	Caudoputamen	caudate nucleus	0.941493897415719
LatentSpace_334	23202	Caudoputamen	caudate nucleus	0.973220035518508
LatentSpace_334	23203	Caudoputamen	putamen	0.970105040488768
LatentSpace_334	23232	Caudoputamen	caudate nucleus	0.950737580959577
LatentSpace_334	23233	Caudoputamen	caudate nucleus	0.962642119585196
LatentSpace_334	23234	Caudoputamen	caudate nucleus	0.923353301669608
LatentSpace_334	23245	Caudoputamen	caudate nucleus	0.899737225002335
LatentSpace_334	23246	Caudoputamen	caudate nucleus	0.954669469148694
LatentSpace_334	23247	Caudoputamen	putamen	0.962516550922486
LatentSpace_334	23275	Caudoputamen	putamen	0.940216493903588
LatentSpace_334	23276	Caudoputamen	caudate nucleus	0.960653152175207
LatentSpace_334	23277	Caudoputamen	caudate nucleus	0.950544927215752
LatentSpace_334	23278	Caudoputamen	caudate nucleus	0.891549321326994
LatentSpace_334	23290	Caudoputamen	caudate nucleus	0.85034661041715
LatentSpace_334	23291	Caudoputamen	caudate nucleus	0.925200336019775
LatentSpace_334	23292	Caudoputamen	putamen	0.947892958003293
LatentSpace_334	23293	Caudoputamen	putamen	0.9574288901183
LatentSpace_334	23322	Caudoputamen	putamen	0.960211224146331
LatentSpace_334	23323	Caudoputamen	caudate nucleus	0.962699139147354
LatentSpace_334	23324	Caudoputamen	caudate nucleus	0.946800707257703
LatentSpace_334	23325	Caudoputamen	caudate nucleus	0.885789252191241
LatentSpace_334	23337	Caudoputamen	caudate nucleus	0.832839463283293
LatentSpace_334	23338	Caudoputamen	caudate nucleus	0.917689417530087
LatentSpace_334	23339	Caudoputamen	putamen	0.942177031852568
LatentSpace_334	23340	Caudoputamen	putamen	0.949360477178602
LatentSpace_334	23341	Caudoputamen	putamen	0.939174587240666
LatentSpace_334	23368	Caudoputamen	putamen	0.956878404561077
LatentSpace_334	23369	Caudoputamen	caudate nucleus	0.967588745544416
LatentSpace_334	23370	Caudoputamen	caudate nucleus	0.960897232505287
LatentSpace_334	23371	Caudoputamen	caudate nucleus	0.934669478132946
LatentSpace_334	23372	Caudoputamen	caudate nucleus	0.866811333329756
LatentSpace_334	23385	Caudoputamen	caudate nucleus	0.913680914536068
LatentSpace_334	23386	Caudoputamen	caudate nucleus	0.945809085931182
LatentSpace_334	23387	Caudoputamen	putamen	0.954843858176977
LatentSpace_334	23388	Caudoputamen	putamen	0.951422989847679
LatentSpace_334	23389	Caudoputamen	putamen	0.932920223840499
LatentSpace_334	23414	Caudoputamen	putamen	0.944469011969912
LatentSpace_334	23415	Caudoputamen	caudate nucleus	0.963473246672682
LatentSpace_334	23416	Caudoputamen	caudate nucleus	0.968163729305635
LatentSpace_334	23417	Caudoputamen	caudate nucleus	0.95697058654157
LatentSpace_334	23418	Caudoputamen	caudate nucleus	0.927802395945388
LatentSpace_334	23419	Caudoputamen	caudate nucleus	0.84655656225775
LatentSpace_334	23433	Caudoputamen	caudate nucleus	0.89565442718177
LatentSpace_334	23434	Caudoputamen	caudate nucleus	0.940606455894835
LatentSpace_334	23435	Caudoputamen	caudate nucleus	0.954007049081719
LatentSpace_334	23436	Caudoputamen	putamen	0.958767662906861
LatentSpace_334	23437	Caudoputamen	putamen	0.958212338880145
LatentSpace_334	23438	Caudoputamen	putamen	0.934959367080909
LatentSpace_334	23461	Caudoputamen	putamen	0.958216862280451
LatentSpace_334	23462	Caudoputamen	caudate nucleus	0.961981826446967
LatentSpace_334	23463	Caudoputamen	caudate nucleus	0.95876660213632
LatentSpace_334	23464	Caudoputamen	caudate nucleus	0.94783960762828
LatentSpace_334	23465	Caudoputamen	caudate nucleus	0.907649443846529
LatentSpace_334	23466	Caudoputamen	caudate nucleus	0.804321580437396
LatentSpace_334	23478	Caudoputamen	caudate nucleus	0.868246187339508
LatentSpace_334	23479	Caudoputamen	caudate nucleus	0.930095137816292
LatentSpace_334	23480	Caudoputamen	putamen	0.952170589791271
LatentSpace_334	23481	Caudoputamen	caudate nucleus	0.963846040439193
LatentSpace_334	23482	Caudoputamen	putamen	0.969917497185122
LatentSpace_334	23483	Caudoputamen	putamen	0.964599536928423
LatentSpace_334	23484	Caudoputamen	putamen	0.942143243883002
LatentSpace_334	23497	Caudoputamen	putamen	0.958489733101837
LatentSpace_334	23498	Caudoputamen	putamen	0.965953523738461
LatentSpace_334	23499	Caudoputamen	caudate nucleus	0.964266677475108
LatentSpace_334	23500	Caudoputamen	caudate nucleus	0.961125770808002
LatentSpace_334	23501	Caudoputamen	caudate nucleus	0.956366067965168
LatentSpace_334	23502	Caudoputamen	caudate nucleus	0.93876933624012
LatentSpace_334	23503	Caudoputamen	caudate nucleus	0.876048718729535
LatentSpace_334	23516	Caudoputamen	putamen	0.909728984276625
LatentSpace_334	23517	Caudoputamen	putamen	0.942107053817225
LatentSpace_334	23518	Caudoputamen	putamen	0.959685304590328
LatentSpace_334	23519	Caudoputamen	putamen	0.96983593677625
LatentSpace_334	23520	Caudoputamen	putamen	0.972864942821562
LatentSpace_334	23521	Caudoputamen	putamen	0.970116718469631
LatentSpace_334	23522	Caudoputamen	putamen	0.963805739512392
LatentSpace_334	23523	Caudoputamen	putamen	0.959698892167544
LatentSpace_334	23525	Caudoputamen	putamen	0.974384422759533
LatentSpace_334	23526	Caudoputamen	putamen	0.973482818999997
LatentSpace_334	23527	Caudoputamen	caudate nucleus	0.970544181340992
LatentSpace_334	23528	Caudoputamen	caudate nucleus	0.965480725315769
LatentSpace_334	23529	Caudoputamen	caudate nucleus	0.961917699407848
LatentSpace_334	23530	Caudoputamen	caudate nucleus	0.955629020916093
LatentSpace_334	23531	Caudoputamen	caudate nucleus	0.927831489009032
LatentSpace_334	23532	Caudoputamen	caudate nucleus	0.836923702387376
LatentSpace_334	23546	Caudoputamen	putamen	0.862768998089877
LatentSpace_334	23547	Caudoputamen	putamen	0.918443878066192
LatentSpace_334	23548	Caudoputamen	putamen	0.94173799925662
LatentSpace_334	23549	Caudoputamen	putamen	0.953062434774852
LatentSpace_334	23550	Caudoputamen	caudate nucleus	0.96119065434562
LatentSpace_334	23551	Caudoputamen	caudate nucleus	0.965682600764834
LatentSpace_334	23552	Caudoputamen	caudate nucleus	0.966230645546253
LatentSpace_334	23553	Caudoputamen	caudate nucleus	0.971848150495211
LatentSpace_334	23554	Caudoputamen	caudate nucleus	0.977250877057944
LatentSpace_334	23557	Caudoputamen	caudate nucleus	0.981761697659677
LatentSpace_334	23558	Caudoputamen	caudate nucleus	0.978571569389071
LatentSpace_334	23559	Caudoputamen	caudate nucleus	0.974991795116889
LatentSpace_334	23560	Caudoputamen	caudate nucleus	0.971216222519543
LatentSpace_334	23561	Caudoputamen	caudate nucleus	0.968595349860066
LatentSpace_334	23562	Caudoputamen	caudate nucleus	0.963496307718154
LatentSpace_334	23563	Caudoputamen	caudate nucleus	0.957189186890059
LatentSpace_334	23564	Caudoputamen	caudate nucleus	0.945775126417919
LatentSpace_334	23565	Caudoputamen	caudate nucleus	0.901852545989073
LatentSpace_334	23578	Caudoputamen	caudate nucleus	0.821447589413585
LatentSpace_334	23579	Caudoputamen	putamen	0.907759773457788
LatentSpace_334	23580	Caudoputamen	putamen	0.938004800498666
LatentSpace_334	23581	Caudoputamen	caudate nucleus	0.94928740980191
LatentSpace_334	23582	Caudoputamen	caudate nucleus	0.957140742341262
LatentSpace_334	23583	Caudoputamen	caudate nucleus	0.964144494957375
LatentSpace_334	23584	Caudoputamen	caudate nucleus	0.966354150225948
LatentSpace_334	23585	Caudoputamen	caudate nucleus	0.974075728509711
LatentSpace_334	23586	Caudoputamen	caudate nucleus	0.980069788858683
LatentSpace_334	23587	Caudoputamen	caudate nucleus	0.986477213547673
LatentSpace_334	23588	Caudoputamen	nucleus accumbens	0.964145343218163
LatentSpace_334	23589	Lateral septal complex	septal nuclei	0.90121452900518
LatentSpace_334	23590	Lateral septal complex	septal nuclei	0.909165895739239
LatentSpace_334	23591	Lateral septal complex	septal nuclei	0.91820607034139
LatentSpace_334	23592	Lateral septal complex	septal nuclei	0.908052653342095
LatentSpace_334	23593	Lateral septal complex	septal nuclei	0.904622925960403
LatentSpace_334	23594	Lateral septal complex	nucleus accumbens	0.89148740296541
LatentSpace_334	23596	Caudoputamen	caudate nucleus	0.985704495322804
LatentSpace_334	23597	Caudoputamen	caudate nucleus	0.984643428129836
LatentSpace_334	23598	Caudoputamen	caudate nucleus	0.981666140015188
LatentSpace_334	23599	Caudoputamen	caudate nucleus	0.978252322750104
LatentSpace_334	23600	Caudoputamen	caudate nucleus	0.973526747038733
LatentSpace_334	23601	Caudoputamen	caudate nucleus	0.971996202036911
LatentSpace_334	23602	Caudoputamen	caudate nucleus	0.96426718677585
LatentSpace_334	23603	Caudoputamen	caudate nucleus	0.953828677970582
LatentSpace_334	23604	Caudoputamen	caudate nucleus	0.934358787505384
LatentSpace_334	23605	Caudoputamen	caudate nucleus	0.855034733669455
LatentSpace_334	23619	Caudoputamen	caudate nucleus	0.891427941333633
LatentSpace_334	23620	Caudoputamen	caudate nucleus	0.941921036075449
LatentSpace_334	23621	Caudoputamen	caudate nucleus	0.953186734330422
LatentSpace_334	23622	Caudoputamen	caudate nucleus	0.960531835591134
LatentSpace_334	23623	Caudoputamen	caudate nucleus	0.965261926474121
LatentSpace_334	23624	Caudoputamen	caudate nucleus	0.966311380673024
LatentSpace_334	23625	Caudoputamen	caudate nucleus	0.97051753823372
LatentSpace_334	23626	Caudoputamen	caudate nucleus	0.976691385301407
LatentSpace_334	23627	Caudoputamen	caudate nucleus	0.982233338142527
LatentSpace_334	23628	Caudoputamen	caudate nucleus	0.987127235263272
LatentSpace_334	23629	Caudoputamen	nucleus accumbens	0.972518753431692
LatentSpace_334	23630	Lateral septal complex	nucleus accumbens	0.919595760502265
LatentSpace_334	23631	Lateral septal complex	septal nuclei	0.898784765081345
LatentSpace_334	23632	Lateral septal complex	septal nuclei	0.896949830446331
LatentSpace_334	23633	Lateral septal complex	septal nuclei	0.908956009941564
LatentSpace_334	23634	Lateral septal complex	septal nuclei	0.91760153468003
LatentSpace_334	23635	Lateral septal complex	septal nuclei	0.904018350374567
LatentSpace_334	23636	Lateral septal complex	septal nuclei	0.901910609194104
LatentSpace_334	23637	Lateral septal complex	nucleus accumbens	0.924584923259553
LatentSpace_334	23638	Caudoputamen	nucleus accumbens	0.972856895278968
LatentSpace_334	23639	Caudoputamen	caudate nucleus	0.98619140555358
LatentSpace_334	23640	Caudoputamen	caudate nucleus	0.984143872750499
LatentSpace_334	23641	Caudoputamen	caudate nucleus	0.980052255235612
LatentSpace_334	23642	Caudoputamen	caudate nucleus	0.977936310866068
LatentSpace_334	23643	Caudoputamen	caudate nucleus	0.976224430796014
LatentSpace_334	23644	Caudoputamen	caudate nucleus	0.971944139304198
LatentSpace_334	23645	Caudoputamen	caudate nucleus	0.966384233383225
LatentSpace_334	23646	Caudoputamen	caudate nucleus	0.957644169711331
LatentSpace_334	23647	Caudoputamen	caudate nucleus	0.944213684504206
LatentSpace_334	23648	Caudoputamen	caudate nucleus	0.902330592777125
LatentSpace_334	23661	Caudoputamen	caudate nucleus	0.921291733713407
LatentSpace_334	23662	Caudoputamen	caudate nucleus	0.955476139544359
LatentSpace_334	23663	Caudoputamen	caudate nucleus	0.968257788451764
LatentSpace_334	23664	Caudoputamen	caudate nucleus	0.970421698817619
LatentSpace_334	23665	Caudoputamen	caudate nucleus	0.968619886543135
LatentSpace_334	23666	Caudoputamen	caudate nucleus	0.972234726999224
LatentSpace_334	23667	Caudoputamen	caudate nucleus	0.97678203367491
LatentSpace_334	23668	Caudoputamen	caudate nucleus	0.982879759380472
LatentSpace_334	23669	Caudoputamen	caudate nucleus	0.9888206857313
LatentSpace_334	23670	Caudoputamen	caudate nucleus	0.975831589422326
LatentSpace_334	23671	Lateral septal complex	septal nuclei	0.90618504748774
LatentSpace_334	23672	Lateral septal complex	septal nuclei	0.906011985724717
LatentSpace_334	23673	Lateral septal complex	septal nuclei	0.913833681423308
LatentSpace_334	23676	Lateral septal complex	septal nuclei	0.914170374871871
LatentSpace_334	23677	Lateral septal complex	septal nuclei	0.90249641559526
LatentSpace_334	23678	Lateral septal complex	septal nuclei	0.904230629761741
LatentSpace_334	23679	Caudoputamen	nucleus accumbens	0.953808997618321
LatentSpace_334	23680	Caudoputamen	caudate nucleus	0.979449231210495
LatentSpace_334	23681	Caudoputamen	caudate nucleus	0.987323130206869
LatentSpace_334	23682	Caudoputamen	caudate nucleus	0.983573951105464
LatentSpace_334	23683	Caudoputamen	caudate nucleus	0.980591850551807
LatentSpace_334	23684	Caudoputamen	caudate nucleus	0.981006878330414
LatentSpace_334	23685	Caudoputamen	caudate nucleus	0.981143105056299
LatentSpace_334	23686	Caudoputamen	caudate nucleus	0.977132269326777
LatentSpace_334	23687	Caudoputamen	caudate nucleus	0.970082061365478
LatentSpace_334	23688	Caudoputamen	caudate nucleus	0.960586121545744
LatentSpace_334	23689	Caudoputamen	caudate nucleus	0.93619258189191
LatentSpace_334	23690	Caudoputamen	caudate nucleus	0.845359047118981
LatentSpace_334	23704	Caudoputamen	caudate nucleus	0.880620588087267
LatentSpace_334	23705	Caudoputamen	caudate nucleus	0.950136386840313
LatentSpace_334	23706	Caudoputamen	caudate nucleus	0.968959617174588
LatentSpace_334	23707	Caudoputamen	caudate nucleus	0.971904306408945
LatentSpace_334	23708	Caudoputamen	caudate nucleus	0.975007764866218
LatentSpace_334	23709	Caudoputamen	caudate nucleus	0.978209122500763
LatentSpace_334	23710	Caudoputamen	caudate nucleus	0.981795844132363
LatentSpace_334	23711	Caudoputamen	caudate nucleus	0.985924614045563
LatentSpace_334	23712	Caudoputamen	caudate nucleus	0.989293427703749
LatentSpace_334	23713	Caudoputamen	caudate nucleus	0.98250953637711
LatentSpace_334	23714	Caudoputamen	nucleus accumbens	0.959976969296822
LatentSpace_334	23715	Lateral septal complex	septal nuclei	0.899862530086712
LatentSpace_334	23716	Lateral septal complex	septal nuclei	0.899599836769984
LatentSpace_334	23717	Lateral septal complex	septal nuclei	0.900397073272217
LatentSpace_334	23718	Lateral septal complex	septal nuclei	0.915954734834114
LatentSpace_334	23720	Lateral septal complex	septal nuclei	0.894196043547107
LatentSpace_334	23721	Lateral septal complex	septal nuclei	0.895166564680026
LatentSpace_334	23722	Lateral septal complex	nucleus accumbens	0.898150253700866
LatentSpace_334	23723	Caudoputamen	nucleus accumbens	0.969953163003643
LatentSpace_334	23724	Caudoputamen	caudate nucleus	0.981327891272853
LatentSpace_334	23725	Caudoputamen	caudate nucleus	0.986713921375476
LatentSpace_334	23726	Caudoputamen	caudate nucleus	0.984521047239909
LatentSpace_334	23727	Caudoputamen	caudate nucleus	0.981480863574573
LatentSpace_334	23728	Caudoputamen	caudate nucleus	0.981984105368109
LatentSpace_334	23729	Caudoputamen	caudate nucleus	0.981468239304444
LatentSpace_334	23730	Caudoputamen	caudate nucleus	0.97979710857655
LatentSpace_334	23731	Caudoputamen	caudate nucleus	0.972058530546854
LatentSpace_334	23732	Caudoputamen	caudate nucleus	0.95286804734695
LatentSpace_334	23733	Caudoputamen	caudate nucleus	0.896787138856703
LatentSpace_334	23745	Caudoputamen	caudate nucleus	0.9044470337099
LatentSpace_334	23746	Caudoputamen	caudate nucleus	0.955341463036609
LatentSpace_334	23747	Caudoputamen	caudate nucleus	0.971903507863325
LatentSpace_334	23748	Caudoputamen	caudate nucleus	0.979140658574418
LatentSpace_334	23749	Caudoputamen	caudate nucleus	0.982635785440122
LatentSpace_334	23750	Caudoputamen	caudate nucleus	0.985121714601327
LatentSpace_334	23751	Caudoputamen	caudate nucleus	0.98701047928835
LatentSpace_334	23752	Caudoputamen	caudate nucleus	0.988448398173968
LatentSpace_334	23753	Caudoputamen	caudate nucleus	0.981524922134117
LatentSpace_334	23754	Caudoputamen	nucleus accumbens	0.972914066554918
LatentSpace_334	23755	Lateral septal complex	nucleus accumbens	0.895888583642138
LatentSpace_334	23756	Lateral septal complex	septal nuclei	0.88197209323537
LatentSpace_334	23757	Lateral septal complex	amygdala	0.877862646050467
LatentSpace_334	23758	Lateral septal complex	septal nuclei	0.875856851867768
LatentSpace_334	23759	Lateral septal complex	amygdala	0.874873708905107
LatentSpace_334	23760	Lateral septal complex	amygdala	0.883911349336534
LatentSpace_334	23761	Lateral septal complex	septal nuclei	0.880236587609206
LatentSpace_334	23762	Lateral septal complex	nucleus accumbens	0.911256562249373
LatentSpace_334	23763	Caudoputamen	nucleus accumbens	0.976397301995475
LatentSpace_334	23764	Caudoputamen	caudate nucleus	0.980694111304114
LatentSpace_334	23765	Caudoputamen	caudate nucleus	0.986248759285636
LatentSpace_334	23766	Caudoputamen	caudate nucleus	0.985724648231419
LatentSpace_334	23767	Caudoputamen	caudate nucleus	0.984294761227183
LatentSpace_334	23768	Caudoputamen	caudate nucleus	0.982866112419273
LatentSpace_334	23769	Caudoputamen	caudate nucleus	0.98169515949858
LatentSpace_334	23770	Caudoputamen	caudate nucleus	0.976655062678563
LatentSpace_334	23771	Caudoputamen	caudate nucleus	0.957785010054982
LatentSpace_334	23772	Caudoputamen	caudate nucleus	0.890509060704412
LatentSpace_334	23787	Caudoputamen	caudate nucleus	0.883547970431233
LatentSpace_334	23788	Caudoputamen	caudate nucleus	0.943991354129242
LatentSpace_334	23789	Caudoputamen	caudate nucleus	0.970348792787644
LatentSpace_334	23790	Caudoputamen	caudate nucleus	0.978546209991993
LatentSpace_334	23791	Caudoputamen	caudate nucleus	0.983513583515519
LatentSpace_334	23792	Caudoputamen	caudate nucleus	0.985251276108079
LatentSpace_334	23793	Caudoputamen	caudate nucleus	0.986851473633307
LatentSpace_334	23794	Caudoputamen	caudate nucleus	0.980773030185522
LatentSpace_334	23795	Caudoputamen	nucleus accumbens	0.973678020474478
LatentSpace_334	23796	Lateral septal complex	amygdala	0.919443474237919
LatentSpace_334	23797	Lateral septal complex	amygdala	0.921879573045686
LatentSpace_334	23798	Lateral septal complex	amygdala	0.914459583570455
LatentSpace_334	23799	Lateral septal complex	amygdala	0.916012897769351
LatentSpace_334	23800	Lateral septal complex	amygdala	0.919781308218634
LatentSpace_334	23801	Lateral septal complex	amygdala	0.918077903259755
LatentSpace_334	23802	Caudoputamen	nucleus accumbens	0.977491201523959
LatentSpace_334	23803	Caudoputamen	caudate nucleus	0.982625285039415
LatentSpace_334	23804	Caudoputamen	caudate nucleus	0.986293380624596
LatentSpace_334	23805	Caudoputamen	caudate nucleus	0.984708407566106
LatentSpace_334	23806	Caudoputamen	caudate nucleus	0.984289688994157
LatentSpace_334	23807	Caudoputamen	caudate nucleus	0.980222411852125
LatentSpace_334	23808	Caudoputamen	caudate nucleus	0.969002188560105
LatentSpace_334	23809	Caudoputamen	caudate nucleus	0.939674823819879
LatentSpace_334	23810	Caudoputamen	caudate nucleus	0.856854002665359
LatentSpace_334	23826	Caudoputamen	caudate nucleus	0.817685599548408
LatentSpace_334	23828	Caudoputamen	caudate nucleus	0.94386564307895
LatentSpace_334	23829	Caudoputamen	caudate nucleus	0.963010641217457
LatentSpace_334	23830	Caudoputamen	caudate nucleus	0.973925479406731
LatentSpace_334	23831	Caudoputamen	caudate nucleus	0.979152444518693
LatentSpace_334	23832	Caudoputamen	caudate nucleus	0.974865058324916
LatentSpace_334	23833	Caudoputamen	nucleus accumbens	0.961677685757354
LatentSpace_334	23840	Caudoputamen	nucleus accumbens	0.962555994407547
LatentSpace_334	23841	Caudoputamen	caudate nucleus	0.974388702167658
LatentSpace_334	23842	Caudoputamen	caudate nucleus	0.977989047792199
LatentSpace_334	23843	Caudoputamen	caudate nucleus	0.97481541072742
LatentSpace_334	23844	Caudoputamen	caudate nucleus	0.969588881119063
LatentSpace_334	23845	Caudoputamen	caudate nucleus	0.955932220468296
LatentSpace_334	23846	Caudoputamen	caudate nucleus	0.916780397370973
LatentSpace_334	23847	Caudoputamen	claustrum	0.824475165321117
LatentSpace_334	23865	Caudoputamen	caudate nucleus	0.869913234995899
LatentSpace_334	23866	Caudoputamen	caudate nucleus	0.908182154534656
LatentSpace_334	23867	Caudoputamen	caudate nucleus	0.926435742663783
LatentSpace_334	23868	Caudoputamen	caudate nucleus	0.930185830647551
LatentSpace_334	23869	Caudoputamen	nucleus accumbens	0.911276759378856
LatentSpace_334	23876	Caudoputamen	nucleus accumbens	0.907896388147559
LatentSpace_334	23877	Caudoputamen	caudate nucleus	0.918182648898561
LatentSpace_334	23878	Caudoputamen	caudate nucleus	0.92933332374947
LatentSpace_334	23879	Caudoputamen	caudate nucleus	0.915969221922619
LatentSpace_334	23880	Caudoputamen	caudate nucleus	0.896537851835254
LatentSpace_334	23881	Caudoputamen	caudate nucleus	0.842565824896577
LatentSpace_334	25059	Caudoputamen	nucleus accumbens	0.852104258479995
LatentSpace_334	25070	Caudoputamen	caudate nucleus	0.967014195161897
LatentSpace_334	25096	Caudoputamen	nucleus accumbens	0.96057866534815
LatentSpace_334	25109	Caudoputamen	caudate nucleus	0.971989706340127
LatentSpace_334	25110	Caudoputamen	caudate nucleus	0.976733125541576
LatentSpace_334	25138	Caudoputamen	caudate nucleus	0.963714582931412
LatentSpace_334	25139	Caudoputamen	caudate nucleus	0.961417508128712
LatentSpace_334	25151	Caudoputamen	caudate nucleus	0.938986804590106
LatentSpace_334	25152	Caudoputamen	caudate nucleus	0.97341110515958
LatentSpace_334	25153	Caudoputamen	putamen	0.975416250160793
LatentSpace_334	25182	Caudoputamen	caudate nucleus	0.961380886133169
LatentSpace_334	25183	Caudoputamen	caudate nucleus	0.968172573967851
LatentSpace_334	25184	Caudoputamen	caudate nucleus	0.927319646745704
LatentSpace_334	25195	Caudoputamen	claustrum	0.751002964425525
LatentSpace_334	25196	Caudoputamen	caudate nucleus	0.876708019375085
LatentSpace_334	25197	Caudoputamen	caudate nucleus	0.954493123836925
LatentSpace_334	25198	Caudoputamen	caudate nucleus	0.969414099910125
LatentSpace_334	25199	Caudoputamen	putamen	0.962049165032096
LatentSpace_334	25226	Caudoputamen	caudate nucleus	0.964840635732771
LatentSpace_334	25227	Caudoputamen	caudate nucleus	0.948647449725521
LatentSpace_334	25228	Caudoputamen	caudate nucleus	0.870823935906562
LatentSpace_334	25240	Caudoputamen	caudate nucleus	0.799082822092436
LatentSpace_334	25241	Caudoputamen	caudate nucleus	0.915911010832672
LatentSpace_334	25242	Caudoputamen	caudate nucleus	0.955791043211715
LatentSpace_334	25243	Caudoputamen	putamen	0.962823181697798
LatentSpace_334	25244	Caudoputamen	putamen	0.942920006829277
LatentSpace_334	25270	Caudoputamen	caudate nucleus	0.964919888932759
LatentSpace_334	25271	Caudoputamen	caudate nucleus	0.960857287494303
LatentSpace_334	25272	Caudoputamen	caudate nucleus	0.935693084919766
LatentSpace_334	25273	Caudoputamen	caudate nucleus	0.849675938134267
LatentSpace_334	25286	Caudoputamen	caudate nucleus	0.778983946453741
LatentSpace_334	25287	Caudoputamen	caudate nucleus	0.902023473233623
LatentSpace_334	25288	Caudoputamen	caudate nucleus	0.946208140784452
LatentSpace_334	25289	Caudoputamen	putamen	0.958590115705338
LatentSpace_334	25290	Caudoputamen	putamen	0.951409348376117
LatentSpace_334	25316	Caudoputamen	putamen	0.963029198650993
LatentSpace_334	25317	Caudoputamen	caudate nucleus	0.965966412314114
LatentSpace_334	25318	Caudoputamen	caudate nucleus	0.953333450407928
LatentSpace_334	25319	Caudoputamen	caudate nucleus	0.916322886357489
LatentSpace_334	25320	Caudoputamen	caudate nucleus	0.819992609522445
LatentSpace_334	25332	Caudoputamen	caudate nucleus	0.8923241573133
LatentSpace_334	25333	Caudoputamen	caudate nucleus	0.946867770798187
LatentSpace_334	25334	Caudoputamen	caudate nucleus	0.961755948844781
LatentSpace_334	25335	Caudoputamen	putamen	0.957395789846783
LatentSpace_334	25336	Caudoputamen	putamen	0.946534186809403
LatentSpace_334	25359	Caudoputamen	putamen	0.956601690114705
LatentSpace_334	25360	Caudoputamen	caudate nucleus	0.967194678932911
LatentSpace_334	25361	Caudoputamen	caudate nucleus	0.965251814499201
LatentSpace_334	25362	Caudoputamen	caudate nucleus	0.949351535523216
LatentSpace_334	25363	Caudoputamen	caudate nucleus	0.90347793061857
LatentSpace_334	25364	Caudoputamen	caudate nucleus	0.793739958223541
LatentSpace_334	25377	Caudoputamen	caudate nucleus	0.874588445874534
LatentSpace_334	25378	Caudoputamen	caudate nucleus	0.941012744261665
LatentSpace_334	25379	Caudoputamen	caudate nucleus	0.959387233061225
LatentSpace_334	25380	Caudoputamen	caudate nucleus	0.961612270392212
LatentSpace_334	25381	Caudoputamen	putamen	0.962832015795771
LatentSpace_334	25382	Caudoputamen	putamen	0.953610045300283
LatentSpace_334	25399	Caudoputamen	putamen	0.958883352122252
LatentSpace_334	25400	Caudoputamen	caudate nucleus	0.965110665840528
LatentSpace_334	25401	Caudoputamen	caudate nucleus	0.963796868148493
LatentSpace_334	25402	Caudoputamen	caudate nucleus	0.956464047402578
LatentSpace_334	25403	Caudoputamen	caudate nucleus	0.939080879496224
LatentSpace_334	25404	Caudoputamen	caudate nucleus	0.876912100647447
LatentSpace_334	25405	Caudoputamen	caudate nucleus	0.748702713533709
LatentSpace_334	25417	Caudoputamen	caudate nucleus	0.93211489876915
LatentSpace_334	25418	Caudoputamen	caudate nucleus	0.954476932173768
LatentSpace_334	25419	Caudoputamen	caudate nucleus	0.964368809267772
LatentSpace_334	25420	Caudoputamen	caudate nucleus	0.970037462067483
LatentSpace_334	25421	Caudoputamen	putamen	0.969843386246803
LatentSpace_334	25422	Caudoputamen	putamen	0.961176645911151
LatentSpace_334	25429	Caudoputamen	putamen	0.974183389280447
LatentSpace_334	25430	Caudoputamen	caudate nucleus	0.972384120288709
LatentSpace_334	25431	Caudoputamen	caudate nucleus	0.967812948881154
LatentSpace_334	25432	Caudoputamen	caudate nucleus	0.961366236105344
LatentSpace_334	25433	Caudoputamen	caudate nucleus	0.952361572230634
LatentSpace_334	25434	Caudoputamen	caudate nucleus	0.927461795761294
LatentSpace_334	25435	Caudoputamen	caudate nucleus	0.83371094724776
LatentSpace_334	25448	Caudoputamen	putamen	0.907299228567096
LatentSpace_334	25449	Caudoputamen	putamen	0.942316235308642
LatentSpace_334	25450	Caudoputamen	putamen	0.958912067980353
LatentSpace_334	25451	Caudoputamen	putamen	0.966587996665253
LatentSpace_334	25452	Caudoputamen	putamen	0.969852464266956
LatentSpace_334	25453	Caudoputamen	putamen	0.970396185881885
LatentSpace_334	25454	Caudoputamen	putamen	0.972598547772835
LatentSpace_334	25455	Caudoputamen	putamen	0.973286324886084
LatentSpace_334	25456	Caudoputamen	caudate nucleus	0.979744023101168
LatentSpace_334	25457	Caudoputamen	caudate nucleus	0.977701106730528
LatentSpace_334	25458	Caudoputamen	caudate nucleus	0.973511933769415
LatentSpace_334	25459	Caudoputamen	caudate nucleus	0.967110119626293
LatentSpace_334	25460	Caudoputamen	caudate nucleus	0.960480051320891
LatentSpace_334	25461	Caudoputamen	caudate nucleus	0.951388510448888
LatentSpace_334	25462	Caudoputamen	caudate nucleus	0.912587670857393
LatentSpace_334	25463	Caudoputamen	caudate nucleus	0.778738436284133
LatentSpace_334	25477	Caudoputamen	putamen	0.842710005373648
LatentSpace_334	25478	Caudoputamen	putamen	0.910741424965239
LatentSpace_334	25479	Caudoputamen	putamen	0.936718045542642
LatentSpace_334	25480	Caudoputamen	putamen	0.949757882636561
LatentSpace_334	25481	Caudoputamen	caudate nucleus	0.959512593564315
LatentSpace_334	25482	Caudoputamen	caudate nucleus	0.964627591974178
LatentSpace_334	25483	Caudoputamen	caudate nucleus	0.968322404546404
LatentSpace_334	25484	Caudoputamen	caudate nucleus	0.973862684696702
LatentSpace_334	25485	Caudoputamen	caudate nucleus	0.977873966250748
LatentSpace_334	25487	Caudoputamen	caudate nucleus	0.983077315268169
LatentSpace_334	25488	Caudoputamen	caudate nucleus	0.980406850136445
LatentSpace_334	25489	Caudoputamen	caudate nucleus	0.975754110557715
LatentSpace_334	25490	Caudoputamen	caudate nucleus	0.973094551350566
LatentSpace_334	25491	Caudoputamen	caudate nucleus	0.969851109413756
LatentSpace_334	25492	Caudoputamen	caudate nucleus	0.962767247426213
LatentSpace_334	25493	Caudoputamen	caudate nucleus	0.955665587708241
LatentSpace_334	25494	Caudoputamen	caudate nucleus	0.941149653537454
LatentSpace_334	25495	Caudoputamen	caudate nucleus	0.866917769543175
LatentSpace_334	25509	Caudoputamen	putamen	0.893987744821894
LatentSpace_334	25510	Caudoputamen	putamen	0.93274584503063
LatentSpace_334	25511	Caudoputamen	caudate nucleus	0.947497325101419
LatentSpace_334	25512	Caudoputamen	caudate nucleus	0.957212464481021
LatentSpace_334	25513	Caudoputamen	caudate nucleus	0.96416287506085
LatentSpace_334	25514	Caudoputamen	caudate nucleus	0.969475531151799
LatentSpace_334	25515	Caudoputamen	caudate nucleus	0.974291833483602
LatentSpace_334	25516	Caudoputamen	caudate nucleus	0.978580485152596
LatentSpace_334	25517	Caudoputamen	caudate nucleus	0.984572022996929
LatentSpace_334	25518	Caudoputamen	caudate nucleus	0.982205606748217
LatentSpace_334	25519	Caudoputamen	nucleus accumbens	0.964565668194101
LatentSpace_334	25520	Lateral septal complex	nucleus accumbens	0.892797001089335
LatentSpace_334	25521	Lateral septal complex	septal nuclei	0.897024459974294
LatentSpace_334	25522	Lateral septal complex	septal nuclei	0.901236793144218
LatentSpace_334	25523	Lateral septal complex	septal nuclei	0.911414372281987
LatentSpace_334	25524	Lateral septal complex	septal nuclei	0.893880829283295
LatentSpace_334	25525	Lateral septal complex	septal nuclei	0.893050809348474
LatentSpace_334	25526	Lateral septal complex	nucleus accumbens	0.906191269243067
LatentSpace_334	25527	Caudoputamen	nucleus accumbens	0.961654694002531
LatentSpace_334	25528	Caudoputamen	caudate nucleus	0.980225221874617
LatentSpace_334	25529	Caudoputamen	caudate nucleus	0.984063427512865
LatentSpace_334	25530	Caudoputamen	caudate nucleus	0.982683695118017
LatentSpace_334	25531	Caudoputamen	caudate nucleus	0.979158356066649
LatentSpace_334	25532	Caudoputamen	caudate nucleus	0.975409308592794
LatentSpace_334	25533	Caudoputamen	caudate nucleus	0.97133617576743
LatentSpace_334	25534	Caudoputamen	caudate nucleus	0.970105287402858
LatentSpace_334	25535	Caudoputamen	caudate nucleus	0.96239697480631
LatentSpace_334	25536	Caudoputamen	caudate nucleus	0.94986921038445
LatentSpace_334	25537	Caudoputamen	caudate nucleus	0.918042588191196
LatentSpace_334	25538	Caudoputamen	caudate nucleus	0.796200229712768
LatentSpace_334	25552	Caudoputamen	putamen	0.857345816896812
LatentSpace_334	25553	Caudoputamen	putamen	0.929106778838136
LatentSpace_334	25554	Caudoputamen	putamen	0.948949576170074
LatentSpace_334	25555	Caudoputamen	caudate nucleus	0.960804103088665
LatentSpace_334	25556	Caudoputamen	caudate nucleus	0.965900183544519
LatentSpace_334	25557	Caudoputamen	caudate nucleus	0.969181736491044
LatentSpace_334	25558	Caudoputamen	caudate nucleus	0.971702699523401
LatentSpace_334	25559	Caudoputamen	caudate nucleus	0.973602690165971
LatentSpace_334	25560	Caudoputamen	caudate nucleus	0.978855451314593
LatentSpace_334	25561	Caudoputamen	caudate nucleus	0.985881072006377
LatentSpace_334	25562	Caudoputamen	nucleus accumbens	0.971670995546468
LatentSpace_334	25563	Lateral septal complex	septal nuclei	0.887892325317577
LatentSpace_334	25564	Lateral septal complex	septal nuclei	0.889014190874458
LatentSpace_334	25565	Lateral septal complex	septal nuclei	0.895866308950841
LatentSpace_334	25566	Lateral septal complex	septal nuclei	0.901241874947001
LatentSpace_334	25567	Lateral septal complex	septal nuclei	0.895329395516021
LatentSpace_334	25568	Lateral septal complex	septal nuclei	0.891030100172954
LatentSpace_334	25569	Caudoputamen	caudate nucleus	0.96894045949474
LatentSpace_334	25570	Caudoputamen	caudate nucleus	0.983667038810045
LatentSpace_334	25571	Caudoputamen	caudate nucleus	0.983745156543214
LatentSpace_334	25572	Caudoputamen	caudate nucleus	0.980552013657644
LatentSpace_334	25573	Caudoputamen	caudate nucleus	0.976861247822313
LatentSpace_334	25574	Caudoputamen	caudate nucleus	0.972843947061182
LatentSpace_334	25575	Caudoputamen	caudate nucleus	0.968354358398349
LatentSpace_334	25576	Caudoputamen	caudate nucleus	0.966380406202037
LatentSpace_334	25577	Caudoputamen	caudate nucleus	0.957608029276185
LatentSpace_334	25578	Caudoputamen	caudate nucleus	0.937755003583311
LatentSpace_334	25579	Caudoputamen	caudate nucleus	0.872398183418151
LatentSpace_334	25592	Caudoputamen	caudate nucleus	0.779503076544061
LatentSpace_334	25593	Caudoputamen	caudate nucleus	0.906196895004014
LatentSpace_334	25594	Caudoputamen	caudate nucleus	0.950852225296013
LatentSpace_334	25595	Caudoputamen	caudate nucleus	0.963756397867926
LatentSpace_334	25596	Caudoputamen	caudate nucleus	0.969666401415124
LatentSpace_334	25597	Caudoputamen	caudate nucleus	0.972700302680441
LatentSpace_334	25598	Caudoputamen	caudate nucleus	0.974999928863429
LatentSpace_334	25599	Caudoputamen	caudate nucleus	0.975590307071455
LatentSpace_334	25600	Caudoputamen	caudate nucleus	0.980028909334722
LatentSpace_334	25601	Caudoputamen	caudate nucleus	0.988081162963928
LatentSpace_334	25602	Caudoputamen	caudate nucleus	0.981902791667375
LatentSpace_334	25603	Lateral septal complex	septal nuclei	0.896956320376185
LatentSpace_334	25604	Lateral septal complex	septal nuclei	0.899686451906438
LatentSpace_334	25605	Lateral septal complex	septal nuclei	0.903931076441184
LatentSpace_334	25608	Lateral septal complex	septal nuclei	0.904055237815166
LatentSpace_334	25609	Lateral septal complex	septal nuclei	0.89790098457063
LatentSpace_334	25610	Lateral septal complex	septal nuclei	0.895216418917793
LatentSpace_334	25611	Caudoputamen	nucleus accumbens	0.960329235052394
LatentSpace_334	25612	Caudoputamen	caudate nucleus	0.981071930098784
LatentSpace_334	25613	Caudoputamen	caudate nucleus	0.986439565788167
LatentSpace_334	25614	Caudoputamen	caudate nucleus	0.984674507342531
LatentSpace_334	25615	Caudoputamen	caudate nucleus	0.983200091400266
LatentSpace_334	25616	Caudoputamen	caudate nucleus	0.979203107287509
LatentSpace_334	25617	Caudoputamen	caudate nucleus	0.977151531517341
LatentSpace_334	25618	Caudoputamen	caudate nucleus	0.972804152193214
LatentSpace_334	25619	Caudoputamen	caudate nucleus	0.967405782895107
LatentSpace_334	25620	Caudoputamen	caudate nucleus	0.955210734833063
LatentSpace_334	25621	Caudoputamen	caudate nucleus	0.923154996090389
LatentSpace_334	25634	Caudoputamen	caudate nucleus	0.85421664527991
LatentSpace_334	25635	Caudoputamen	caudate nucleus	0.940471411067549
LatentSpace_334	25636	Caudoputamen	caudate nucleus	0.964732991833641
LatentSpace_334	25637	Caudoputamen	caudate nucleus	0.971833309941147
LatentSpace_334	25638	Caudoputamen	caudate nucleus	0.975487131807063
LatentSpace_334	25639	Caudoputamen	caudate nucleus	0.978977880292945
LatentSpace_334	25640	Caudoputamen	caudate nucleus	0.981395207046237
LatentSpace_334	25641	Caudoputamen	caudate nucleus	0.985460110140912
LatentSpace_334	25642	Caudoputamen	caudate nucleus	0.989463408456947
LatentSpace_334	25643	Caudoputamen	caudate nucleus	0.986643637931924
LatentSpace_334	25644	Caudoputamen	nucleus accumbens	0.969466115048116
LatentSpace_334	25645	Lateral septal complex	nucleus accumbens	0.904712007842719
LatentSpace_334	25646	Lateral septal complex	septal nuclei	0.894413546136316
LatentSpace_334	25647	Lateral septal complex	septal nuclei	0.893870726460585
LatentSpace_334	25648	Lateral septal complex	septal nuclei	0.898535888400455
LatentSpace_334	25649	Lateral septal complex	septal nuclei	0.893099098048997
LatentSpace_334	25650	Lateral septal complex	septal nuclei	0.886281078561363
LatentSpace_334	25651	Lateral septal complex	septal nuclei	0.889786141706862
LatentSpace_334	25652	Caudoputamen	nucleus accumbens	0.974020221669013
LatentSpace_334	25653	Caudoputamen	caudate nucleus	0.982942703678811
LatentSpace_334	25654	Caudoputamen	caudate nucleus	0.986328642952939
LatentSpace_334	25655	Caudoputamen	caudate nucleus	0.983396012527615
LatentSpace_334	25656	Caudoputamen	caudate nucleus	0.981220457704687
LatentSpace_334	25657	Caudoputamen	caudate nucleus	0.980530976253247
LatentSpace_334	25658	Caudoputamen	caudate nucleus	0.980667607261755
LatentSpace_334	25659	Caudoputamen	caudate nucleus	0.977117469818923
LatentSpace_334	25660	Caudoputamen	caudate nucleus	0.96828251816554
LatentSpace_334	25661	Caudoputamen	caudate nucleus	0.938052242983938
LatentSpace_334	25662	Caudoputamen	caudate nucleus	0.857421632430489
LatentSpace_334	25675	Caudoputamen	caudate nucleus	0.889352279694143
LatentSpace_334	25676	Caudoputamen	caudate nucleus	0.956258707200461
LatentSpace_334	25677	Caudoputamen	caudate nucleus	0.973098901261425
LatentSpace_334	25678	Caudoputamen	caudate nucleus	0.979434766621972
LatentSpace_334	25679	Caudoputamen	caudate nucleus	0.982100085236905
LatentSpace_334	25680	Caudoputamen	caudate nucleus	0.984925686557249
LatentSpace_334	25681	Caudoputamen	caudate nucleus	0.98783661758948
LatentSpace_334	25682	Caudoputamen	caudate nucleus	0.989105189285779
LatentSpace_334	25683	Caudoputamen	caudate nucleus	0.984018804952295
LatentSpace_334	25684	Caudoputamen	nucleus accumbens	0.977478587879335
LatentSpace_334	25685	Lateral septal complex	amygdala	0.88136608439971
LatentSpace_334	25686	Lateral septal complex	amygdala	0.889237947022852
LatentSpace_334	25687	Lateral septal complex	amygdala	0.885038399225326
LatentSpace_334	25688	Lateral septal complex	amygdala	0.885627225765449
LatentSpace_334	25689	Lateral septal complex	amygdala	0.891188165503182
LatentSpace_334	25690	Lateral septal complex	amygdala	0.881659119552358
LatentSpace_334	25691	Caudoputamen	nucleus accumbens	0.979048983111992
LatentSpace_334	25692	Caudoputamen	caudate nucleus	0.981644742223995
LatentSpace_334	25693	Caudoputamen	caudate nucleus	0.986815607427602
LatentSpace_334	25694	Caudoputamen	caudate nucleus	0.985805450034556
LatentSpace_334	25695	Caudoputamen	caudate nucleus	0.983617214727455
LatentSpace_334	25696	Caudoputamen	caudate nucleus	0.982105280867327
LatentSpace_334	25697	Caudoputamen	caudate nucleus	0.980978374509524
LatentSpace_334	25698	Caudoputamen	caudate nucleus	0.974076435120641
LatentSpace_334	25699	Caudoputamen	caudate nucleus	0.950924630421608
LatentSpace_334	25700	Caudoputamen	caudate nucleus	0.855807978262019
LatentSpace_334	25715	Caudoputamen	caudate nucleus	0.862700681730255
LatentSpace_334	25716	Caudoputamen	caudate nucleus	0.931341563876453
LatentSpace_334	25717	Caudoputamen	caudate nucleus	0.963402587577071
LatentSpace_334	25718	Caudoputamen	caudate nucleus	0.975374104444171
LatentSpace_334	25719	Caudoputamen	caudate nucleus	0.983025695005257
LatentSpace_334	25720	Caudoputamen	caudate nucleus	0.986418659236879
LatentSpace_334	25721	Caudoputamen	caudate nucleus	0.988224012935133
LatentSpace_334	25722	Caudoputamen	caudate nucleus	0.981556601003076
LatentSpace_334	25723	Caudoputamen	nucleus accumbens	0.973902463747067
LatentSpace_334	25724	Lateral septal complex	amygdala	0.925994863276643
LatentSpace_334	25725	Lateral septal complex	amygdala	0.930768307210908
LatentSpace_334	25726	Lateral septal complex	amygdala	0.921281805413937
LatentSpace_334	25727	Lateral septal complex	amygdala	0.91996834211915
LatentSpace_334	25728	Lateral septal complex	amygdala	0.922997169025428
LatentSpace_334	25729	Lateral septal complex	amygdala	0.918128493298296
LatentSpace_334	25730	Caudoputamen	nucleus accumbens	0.974673735452854
LatentSpace_334	25731	Caudoputamen	caudate nucleus	0.982300831575814
LatentSpace_334	25732	Caudoputamen	caudate nucleus	0.987457707709146
LatentSpace_334	25733	Caudoputamen	caudate nucleus	0.983931327240864
LatentSpace_334	25734	Caudoputamen	caudate nucleus	0.982172586355156
LatentSpace_334	25735	Caudoputamen	caudate nucleus	0.977763668215452
LatentSpace_334	25736	Caudoputamen	caudate nucleus	0.966501188596344
LatentSpace_334	25737	Caudoputamen	caudate nucleus	0.937020712129042
LatentSpace_334	25753	Caudoputamen	caudate nucleus	0.79029658428111
LatentSpace_334	25754	Caudoputamen	caudate nucleus	0.889270862032053
LatentSpace_334	25755	Caudoputamen	caudate nucleus	0.936776723092357
LatentSpace_334	25756	Caudoputamen	caudate nucleus	0.962193138608134
LatentSpace_334	25757	Caudoputamen	caudate nucleus	0.9730159496496
LatentSpace_334	25758	Caudoputamen	caudate nucleus	0.978537810336104
LatentSpace_334	25759	Caudoputamen	caudate nucleus	0.972076824538393
LatentSpace_334	25760	Caudoputamen	nucleus accumbens	0.949704617148042
LatentSpace_334	25767	Caudoputamen	nucleus accumbens	0.95310648677838
LatentSpace_334	25768	Caudoputamen	caudate nucleus	0.971322185764094
LatentSpace_334	25769	Caudoputamen	caudate nucleus	0.977452790867473
LatentSpace_334	25770	Caudoputamen	caudate nucleus	0.970798099707765
LatentSpace_334	25771	Caudoputamen	caudate nucleus	0.963188453919019
LatentSpace_334	25772	Caudoputamen	caudate nucleus	0.955065177202207
LatentSpace_334	25773	Caudoputamen	caudate nucleus	0.918364002069876
LatentSpace_334	25791	Caudoputamen	caudate nucleus	0.911841451844919
LatentSpace_334	25792	Caudoputamen	nucleus accumbens	0.868630908220473
LatentSpace_334	27062	Caudoputamen	caudate nucleus	0.958910659602998
LatentSpace_334	27085	Caudoputamen	caudate nucleus	0.951000710360984
LatentSpace_334	27097	Caudoputamen	caudate nucleus	0.963140318220104
LatentSpace_334	27098	Caudoputamen	putamen	0.967884860387958
LatentSpace_334	27125	Caudoputamen	caudate nucleus	0.964059809329089
LatentSpace_334	27126	Caudoputamen	caudate nucleus	0.956478816914116
LatentSpace_334	27138	Caudoputamen	caudate nucleus	0.917296510470923
LatentSpace_334	27139	Caudoputamen	caudate nucleus	0.972483748700186
LatentSpace_334	27166	Caudoputamen	caudate nucleus	0.971332192021859
LatentSpace_334	27167	Caudoputamen	caudate nucleus	0.970963683129612
LatentSpace_334	27168	Caudoputamen	caudate nucleus	0.909835786474567
LatentSpace_334	27180	Caudoputamen	caudate nucleus	0.822316655431662
LatentSpace_334	27181	Caudoputamen	caudate nucleus	0.947763077083689
LatentSpace_334	27182	Caudoputamen	caudate nucleus	0.971915390749409
LatentSpace_334	27209	Caudoputamen	caudate nucleus	0.970045104025094
LatentSpace_334	27210	Caudoputamen	caudate nucleus	0.945885323802675
LatentSpace_334	27211	Caudoputamen	caudate nucleus	0.822140861682437
LatentSpace_334	27223	Caudoputamen	caudate nucleus	0.890526572878211
LatentSpace_334	27224	Caudoputamen	caudate nucleus	0.955709887871908
LatentSpace_334	27225	Caudoputamen	putamen	0.97062111222377
LatentSpace_334	27251	Caudoputamen	caudate nucleus	0.968389348850422
LatentSpace_334	27252	Caudoputamen	caudate nucleus	0.956677628467894
LatentSpace_334	27253	Caudoputamen	caudate nucleus	0.914600040183366
LatentSpace_334	27254	Caudoputamen	caudate nucleus	0.773228550473823
LatentSpace_334	27267	Caudoputamen	caudate nucleus	0.87634008198565
LatentSpace_334	27268	Caudoputamen	caudate nucleus	0.944419877391663
LatentSpace_334	27269	Caudoputamen	putamen	0.959955674012772
LatentSpace_334	27270	Caudoputamen	putamen	0.960245530979789
LatentSpace_334	27293	Caudoputamen	putamen	0.965877578555917
LatentSpace_334	27294	Caudoputamen	caudate nucleus	0.961482665219964
LatentSpace_334	27295	Caudoputamen	caudate nucleus	0.93954043176836
LatentSpace_334	27296	Caudoputamen	caudate nucleus	0.878046309801676
LatentSpace_334	27297	Caudoputamen	caudate nucleus	0.740312089676038
LatentSpace_334	27310	Caudoputamen	caudate nucleus	0.849950455312346
LatentSpace_334	27311	Caudoputamen	caudate nucleus	0.935367077494192
LatentSpace_334	27312	Caudoputamen	caudate nucleus	0.957599813254701
LatentSpace_334	27313	Caudoputamen	putamen	0.958766089699288
LatentSpace_334	27314	Caudoputamen	putamen	0.955434195091696
LatentSpace_334	27332	Caudoputamen	caudate nucleus	0.965530409714935
LatentSpace_334	27333	Caudoputamen	caudate nucleus	0.965973666945592
LatentSpace_334	27334	Caudoputamen	caudate nucleus	0.959795719460047
LatentSpace_334	27335	Caudoputamen	caudate nucleus	0.938423189089299
LatentSpace_334	27336	Caudoputamen	caudate nucleus	0.866810248061717
LatentSpace_334	27348	Caudoputamen	caudate nucleus	0.824290112909815
LatentSpace_334	27349	Caudoputamen	caudate nucleus	0.929370990042612
LatentSpace_334	27350	Caudoputamen	caudate nucleus	0.955890011256285
LatentSpace_334	27351	Caudoputamen	caudate nucleus	0.960945090441824
LatentSpace_334	27352	Caudoputamen	putamen	0.963323706693946
LatentSpace_334	27353	Caudoputamen	putamen	0.962415792512349
LatentSpace_334	27354	Caudoputamen	putamen	0.952562484363824
LatentSpace_334	27365	Caudoputamen	caudate nucleus	0.970995836025167
LatentSpace_334	27366	Caudoputamen	caudate nucleus	0.969684681835946
LatentSpace_334	27367	Caudoputamen	caudate nucleus	0.963979946587885
LatentSpace_334	27368	Caudoputamen	caudate nucleus	0.95328029823474
LatentSpace_334	27369	Caudoputamen	caudate nucleus	0.927055143118082
LatentSpace_334	27370	Caudoputamen	caudate nucleus	0.832779761575966
LatentSpace_334	27382	Caudoputamen	caudate nucleus	0.913313738663594
LatentSpace_334	27383	Caudoputamen	caudate nucleus	0.952390125758546
LatentSpace_334	27384	Caudoputamen	caudate nucleus	0.961278652173377
LatentSpace_334	27385	Caudoputamen	caudate nucleus	0.966608407571085
LatentSpace_334	27386	Caudoputamen	caudate nucleus	0.967802807608751
LatentSpace_334	27387	Caudoputamen	putamen	0.971724312985983
LatentSpace_334	27388	Caudoputamen	putamen	0.97150689047924
LatentSpace_334	27389	Caudoputamen	caudate nucleus	0.978912757027601
LatentSpace_334	27390	Caudoputamen	caudate nucleus	0.976495237264212
LatentSpace_334	27391	Caudoputamen	caudate nucleus	0.970176762501468
LatentSpace_334	27392	Caudoputamen	caudate nucleus	0.960471716839607
LatentSpace_334	27393	Caudoputamen	caudate nucleus	0.945699745012886
LatentSpace_334	27394	Caudoputamen	caudate nucleus	0.903717068503283
LatentSpace_334	27395	Caudoputamen	caudate nucleus	0.766035792802247
LatentSpace_334	27409	Caudoputamen	putamen	0.881460273493177
LatentSpace_334	27410	Caudoputamen	putamen	0.938549201500615
LatentSpace_334	27411	Caudoputamen	putamen	0.956005147167426
LatentSpace_334	27412	Caudoputamen	putamen	0.960003005823943
LatentSpace_334	27413	Caudoputamen	caudate nucleus	0.965481162033315
LatentSpace_334	27414	Caudoputamen	caudate nucleus	0.970121256062992
LatentSpace_334	27415	Caudoputamen	caudate nucleus	0.976292431307492
LatentSpace_334	27416	Caudoputamen	caudate nucleus	0.980447594378159
LatentSpace_334	27417	Caudoputamen	caudate nucleus	0.982044881709519
LatentSpace_334	27418	Caudoputamen	caudate nucleus	0.981389537199604
LatentSpace_334	27419	Caudoputamen	caudate nucleus	0.979332965092521
LatentSpace_334	27420	Caudoputamen	caudate nucleus	0.974334261337001
LatentSpace_334	27421	Caudoputamen	caudate nucleus	0.968348599876679
LatentSpace_334	27422	Caudoputamen	caudate nucleus	0.960615570073243
LatentSpace_334	27423	Caudoputamen	caudate nucleus	0.943727983064312
LatentSpace_334	27424	Caudoputamen	caudate nucleus	0.871951623141574
LatentSpace_334	27438	Caudoputamen	caudate nucleus	0.804957985034867
LatentSpace_334	27439	Caudoputamen	putamen	0.902168806003239
LatentSpace_334	27440	Caudoputamen	putamen	0.933482003699546
LatentSpace_334	27441	Caudoputamen	putamen	0.946213749223612
LatentSpace_334	27442	Caudoputamen	caudate nucleus	0.956270819832228
LatentSpace_334	27443	Caudoputamen	caudate nucleus	0.961371585301996
LatentSpace_334	27444	Caudoputamen	caudate nucleus	0.968510773623017
LatentSpace_334	27445	Caudoputamen	caudate nucleus	0.973914710133995
LatentSpace_334	27446	Caudoputamen	caudate nucleus	0.977320669911246
LatentSpace_334	27447	Caudoputamen	caudate nucleus	0.982251904872042
LatentSpace_334	27448	Caudoputamen	caudate nucleus	0.970628541166529
LatentSpace_334	27449	Caudoputamen	nucleus accumbens	0.935275726294339
LatentSpace_334	27450	Lateral septal complex	septal nuclei	0.90005800526219
LatentSpace_334	27451	Lateral septal complex	septal nuclei	0.880160732285976
LatentSpace_334	27452	Caudoputamen	nucleus accumbens	0.931994797376181
LatentSpace_334	27453	Caudoputamen	caudate nucleus	0.967853334993664
LatentSpace_334	27454	Caudoputamen	caudate nucleus	0.981496922463625
LatentSpace_334	27455	Caudoputamen	caudate nucleus	0.982454542206622
LatentSpace_334	27456	Caudoputamen	caudate nucleus	0.980225312463143
LatentSpace_334	27457	Caudoputamen	caudate nucleus	0.976887259955049
LatentSpace_334	27458	Caudoputamen	caudate nucleus	0.974006101584066
LatentSpace_334	27459	Caudoputamen	caudate nucleus	0.971187703889287
LatentSpace_334	27460	Caudoputamen	caudate nucleus	0.964273203395156
LatentSpace_334	27461	Caudoputamen	caudate nucleus	0.954864857304956
LatentSpace_334	27462	Caudoputamen	caudate nucleus	0.924310735042446
LatentSpace_334	27463	Caudoputamen	caudate nucleus	0.79943885834113
LatentSpace_334	27477	Caudoputamen	putamen	0.874371212549603
LatentSpace_334	27478	Caudoputamen	putamen	0.931372137410311
LatentSpace_334	27479	Caudoputamen	caudate nucleus	0.950099928399493
LatentSpace_334	27480	Caudoputamen	caudate nucleus	0.957906535329622
LatentSpace_334	27481	Caudoputamen	caudate nucleus	0.967754929981669
LatentSpace_334	27482	Caudoputamen	caudate nucleus	0.971811005083864
LatentSpace_334	27483	Caudoputamen	caudate nucleus	0.975462616029475
LatentSpace_334	27484	Caudoputamen	caudate nucleus	0.978679839251994
LatentSpace_334	27485	Caudoputamen	caudate nucleus	0.981842521782641
LatentSpace_334	27486	Caudoputamen	caudate nucleus	0.982557279239489
LatentSpace_334	27487	Caudoputamen	nucleus accumbens	0.962643760244026
LatentSpace_334	27488	Lateral septal complex	nucleus accumbens	0.903236144312701
LatentSpace_334	27489	Lateral septal complex	septal nuclei	0.886925985723585
LatentSpace_334	27490	Lateral septal complex	septal nuclei	0.887324917270113
LatentSpace_334	27491	Lateral septal complex	septal nuclei	0.890877603750215
[truncated: 771,001 more rows]
