# Supplementary material for: Whole-brain comparison of rodent and human brains using spatial transcriptomics
Source: eLife. 2022 Nov 7;11:e79418. doi: 10.7554/eLife.79418 (PMC9708081; doi:10.7554/eLife.79418)
Supplement: Supplementary file 1. [file elife-79418-supp1.csv]

Identifier	Title	b	B	n	N	E	P.Value	adj.P.Val
GO:0007399	Nervous system development	709	2237	2853	16563	1.839998552214524	5.143225381965916e-74	8.104180234363693e-70
GO:0051239	Regulation of multicellular organismal process	922	3224	2853	16563	1.6602485825290345	1.629407036333019e-73	1.283728333574969e-69
GO:0048699	Generation of neurons	576	1673	2853	16563	1.9987743734691454	3.6414847598539176e-73	1.9126291787006059e-69
GO:0065008	Regulation of biological quality	1068	3956	2853	16563	1.5673002395434958	4.505676206687528e-72	1.529439859760599e-68
GO:0022008	Neurogenesis	599	1780	2853	16563	1.9536378029040984	4.853207652981529e-72	1.529439859760599e-68
GO:0048731	System development	1086	4154	2853	16563	1.517751124301156	8.647575700595685e-65	2.2709975052381034e-61
GO:0007275	Multicellular organism development	1157	4530	2853	16563	1.4827652082274263	5.8325982287187995e-64	1.3129178612846017e-60
GO:0051960	Regulation of nervous system development	400	1074	2853	16563	2.162185448229542	1.0841826604827427e-59	2.135433272653322e-56
GO:0032879	Regulation of localization	787	2766	2853	16563	1.6518088429958797	1.7709193152941729e-59	3.100486183454476e-56
GO:0048856	Anatomical structure development	1217	4966	2853	16563	1.4227254266975473	1.0725812735811667e-56	1.6900663127818444e-53
GO:0007610	Behavior	282	669	2853	16563	2.447147916047776	3.616071998456503e-54	5.1798587708799204e-51
GO:0050767	Regulation of neurogenesis	358	957	2853	16563	2.1717424434709325	1.0852895794400115e-53	1.4250756586030217e-50
GO:0023051	Regulation of signaling	870	3255	2853	16563	1.5516918887225186	3.1318659666140996e-53	3.7960624643029517e-50
GO:0060284	Regulation of cell development	390	1094	2853	16563	2.0695909434310464	2.0407087484447822e-52	2.192562559671235e-49
GO:0032502	Developmental process	1250	5220	2853	16563	1.39019825873954	2.0872271622179682e-52	2.192562559671235e-49
GO:0030182	Neuron differentiation	375	1039	2853	16563	2.0953325054726846	7.89241608965499e-52	7.772550020293355e-49
GO:0010646	Regulation of cell communication	860	3231	2853	16563	1.545249897402301	1.314733983910389e-51	1.2186037284985882e-48
GO:0045595	Regulation of cell differentiation	576	1897	2853	16563	1.7627567352735267	2.0113530688782885e-51	1.7607161281286217e-48
GO:2000026	Regulation of multicellular organismal development	635	2168	2853	16563	1.70040227610478	4.019817848351869e-51	3.3336984124463363e-48
GO:0050793	Regulation of developmental process	743	2689	2853	16563	1.6041140464383656	5.549981212877518e-50	4.3725526985655525e-47
GO:0031175	Neuron projection development	276	686	2853	16563	2.335727621377528	3.4357585382658546e-48	2.5779641565454796e-45
GO:0030154	Cell differentiation	888	3425	2853	16563	1.505184093578024	3.701250431411551e-48	2.6509365021705368e-45
GO:0048666	Neuron development	315	839	2853	16563	2.1796452890063653	1.942447677568376e-47	1.3307455676280392e-44
GO:0045664	Regulation of neuron differentiation	299	778	2853	16563	2.231150270720308	2.1927823600884393e-47	1.4396529853297308e-44
GO:0009653	Anatomical structure morphogenesis	620	2149	2853	16563	1.6749139672720885	2.68573745331755e-47	1.6927666020769853e-44
GO:0048869	Cellular developmental process	910	3555	2853	16563	1.486069146253629	5.604486011922959e-47	3.3965340803796184e-44
GO:0051179	Localization	1053	4312	2853	16563	1.4177081931137814	1.546605319666845e-45	9.025874082218696e-43
GO:0007267	Cell-cell signaling	269	679	2853	16563	2.2999571027474373	1.8913695512350958e-45	1.0643682149575502e-42
GO:0000902	Cell morphogenesis	282	729	2853	16563	2.2457365649327325	2.7471468353421012e-45	1.4926480236029477e-42
GO:0051240	Positive regulation of multicellular organismal process	563	1918	2853	16563	1.7041076349027258	5.3706215112857066e-45	2.820829438444296e-42
GO:0051049	Regulation of transport	549	1871	2853	16563	1.7034750896549864	1.0392905449681486e-43	5.282613263568748e-41
GO:0048812	Neuron projection morphogenesis	207	468	2853	16563	2.567803122219526	1.4441021708361908e-43	7.110849345583081e-41
GO:0048858	Cell projection morphogenesis	210	479	2853	16563	2.545194707691497	1.8459074731039492e-43	8.813928501120888e-41
GO:0120039	Plasma membrane bounded cell projection morphogenesis	207	473	2853	16563	2.540659326001561	1.0700832186630141e-42	4.95920625778621e-40
GO:0032989	Cellular component morphogenesis	300	834	2853	16563	2.0882978160058703	7.491777220637366e-41	3.3727981047309424e-38
GO:0061564	Axon development	174	373	2853	16563	2.708180749486219	1.8548108423368446e-40	8.118404011861572e-38
GO:0051962	Positive regulation of nervous system development	252	655	2853	16563	2.233554073253546	5.9980899444052375e-40	2.554375763621441e-37
GO:0032990	Cell part morphogenesis	211	505	2853	16563	2.4256509562628183	9.317980948915586e-40	3.863774363475339e-37
GO:0010975	Regulation of neuron projection development	238	606	2853	16563	2.2800352590464095	1.909674047629295e-39	7.715572812434565e-37
GO:0099536	Synaptic signaling	172	373	2853	16563	2.6770522351243082	3.551627143788191e-39	1.3990747226167632e-36
GO:0000904	Cell morphogenesis involved in differentiation	227	568	2853	16563	2.3201429925504655	4.856405212566793e-39	1.866399437424755e-36
GO:0045597	Positive regulation of cell differentiation	361	1105	2853	16563	1.896627983879793	1.2828604098734493e-38	4.8128646377085574e-36
GO:0007409	Axonogenesis	162	343	2853	16563	2.7419411207475326	1.485449478321297e-38	5.443308704629925e-36
GO:0051094	Positive regulation of developmental process	461	1543	2853	16563	1.7344917142169822	2.376805008210319e-38	8.511662844175e-36
GO:0099537	Trans-synaptic signaling	166	358	2853	16563	2.6919208830457797	3.2653778762678913e-38	1.1433902043634036e-35
GO:0051128	Regulation of cellular component organization	673	2540	2853	16563	1.5382204393220564	7.611448707133354e-38	2.6072521147456574e-35
GO:0048667	Cell morphogenesis involved in neuron differentiation	187	432	2853	16563	2.5130150523815087	8.250743936318303e-38	2.7661057915865424e-35
GO:0048518	Positive regulation of biological process	1354	6098	2853	16563	1.2890461750055784	1.0909734838620465e-37	3.581347746919639e-35
GO:0048523	Negative regulation of cellular process	1063	4526	2853	16563	1.3635025205460864	1.608736017419095e-37	5.17323539315769e-35
GO:0051241	Negative regulation of multicellular organismal process	409	1326	2853	16563	1.7906760050942647	2.716034553252645e-37	8.559311291120384e-35
GO:0098916	Anterograde trans-synaptic signaling	159	340	2853	16563	2.714910001855632	3.406260701138556e-37	1.032162497458466e-34
GO:0007268	Chemical synaptic transmission	159	340	2853	16563	2.714910001855632	3.406260701138556e-37	1.032162497458466e-34
GO:0048468	Cell development	503	1751	2853	16563	1.667704379231096	5.372635658124676e-37	1.5800069399723769e-34
GO:0007611	Learning or memory	143	289	2853	16563	2.8726017777680752	5.414760091293289e-37	1.5800069399723769e-34
GO:0120035	Regulation of plasma membrane bounded cell projection organization	277	777	2853	16563	2.0696455806865903	7.044484980126444e-37	2.0181809060336798e-34
GO:0099177	Regulation of trans-synaptic signaling	245	657	2853	16563	2.1649005212809715	3.1799927972429496e-36	8.947704733242349e-34
GO:0050890	Cognition	152	323	2853	16563	2.73198490752768	5.4393102687218634e-36	1.5036352965657964e-33
GO:0050804	Modulation of chemical synaptic transmission	244	656	2853	16563	2.1593508758431437	7.245689878268368e-36	1.956996650145404e-33
GO:0031344	Regulation of cell projection organization	277	786	2853	16563	2.0459473488466675	7.32771481618194e-36	1.956996650145404e-33
GO:0048522	Positive regulation of cellular process	1227	5459	2853	16563	1.3048743631187	3.3265049614182763e-35	8.735956446177964e-33
GO:0048513	Animal organ development	764	3039	2853	16563	1.4594858497437277	5.903785867831817e-35	1.5250156380233763e-32
GO:0048519	Negative regulation of biological process	1160	5102	2853	16563	1.3199417477569053	6.205539289291757e-35	1.5771077835704873e-32
GO:0042391	Regulation of membrane potential	184	440	2853	16563	2.4277411337348247	8.687362894700115e-35	2.1728059862188844e-32
GO:0030030	Cell projection organization	342	1071	2853	16563	1.85384690153664	2.803900781565139e-34	6.903291346112796e-32
GO:0120036	Plasma membrane bounded cell projection organization	336	1049	2853	16563	1.8595207092228443	5.909899478402243e-34	1.4326505550951407e-31
GO:0040011	Locomotion	350	1120	2853	16563	1.8142087276550998	5.5394734162595694e-33	1.3225073124242732e-30
GO:0010721	Negative regulation of cell development	165	384	2853	16563	2.4945370005257623	5.701833715725654e-33	1.3409521471446137e-30
GO:0006811	Ion transport	314	967	2853	16563	1.8851260905355165	6.385714435317144e-33	1.4797015052542976e-30
GO:0050768	Negative regulation of neurogenesis	151	336	2853	16563	2.6090049321516195	6.60282547643179e-33	1.5078365366976191e-30
GO:0051961	Negative regulation of nervous system development	158	361	2853	16563	2.5408973205053145	9.793276972478667e-33	2.204466646504948e-30
GO:0050769	Positive regulation of neurogenesis	218	585	2853	16563	2.1634051425849536	3.3048539627412425e-32	7.334448435339966e-30
GO:0048583	Regulation of response to stimulus	886	3735	2853	16563	1.3771471444839998	2.6721552954904563e-31	5.847937637644878e-29
GO:0050808	Synapse organization	131	282	2853	16563	2.6968663072092833	1.908986790605854e-30	4.120534912270746e-28
GO:0006928	Movement of cell or subcellular component	394	1346	2853	16563	1.699371741328046	1.977122607896083e-30	4.209935261164673e-28
GO:0043269	Regulation of ion transport	230	647	2853	16563	2.0637675789090473	2.0103465539246267e-30	4.223604086692046e-28
GO:0010720	Positive regulation of cell development	234	665	2853	16563	2.042826308673893	3.4229033218086546e-30	7.096669426544601e-28
GO:0009966	Regulation of signal transduction	671	2670	2853	16563	1.4589771460752923	5.2919552827115785e-30	1.0829264855803421e-27
GO:1903530	Regulation of secretion by cell	274	831	2853	16563	1.9141976081925287	6.44538305559646e-30	1.2960544866342095e-27
GO:0034220	Ion transmembrane transport	195	515	2853	16563	2.1981868855471505	6.513860619425639e-30	1.2960544866342095e-27
GO:0097485	Neuron projection guidance	111	220	2853	16563	2.929122454832234	6.58020936286963e-30	1.2960544866342095e-27
GO:0007417	Central nervous system development	274	832	2853	16563	1.9118968899134512	8.044672153098771e-30	1.5649370261281153e-27
GO:0007411	Axon guidance	110	219	2853	16563	2.9159884572355947	1.9826896902701207e-29	3.809907493851987e-27
GO:0044057	Regulation of system process	215	597	2853	16563	2.0907464064098975	2.322032079643713e-29	4.408224033607951e-27
GO:0042221	Response to chemical	859	3639	2853	16563	1.3704031191476609	2.532377962132122e-29	4.750318993966173e-27
GO:0048585	Negative regulation of response to stimulus	431	1544	2853	16563	1.6205677961022757	2.1990778163897978e-28	4.0765728415122406e-26
GO:0065009	Regulation of molecular function	610	2401	2853	16563	1.4749418727125176	2.614223522429721e-28	4.789804656154083e-26
GO:0051046	Regulation of secretion	287	911	2853	16563	1.8289454396031215	1.2797879052613585e-27	2.317887129103819e-25
GO:0060322	Head development	229	669	2853	16563	1.9872229531026266	1.3319596091721408e-27	2.384964495650616e-25
GO:0010648	Negative regulation of cell communication	368	1271	2853	16563	1.6808907928297763	2.3534961459783217e-27	4.166745929458473e-25
GO:0050803	Regulation of synapse structure or activity	126	282	2853	16563	2.5939324786898452	2.4544120812092626e-27	4.297130129290484e-25
GO:0023057	Negative regulation of signaling	369	1276	2853	16563	1.678853969917823	2.5496989102732382e-27	4.414901728480815e-25
GO:0022603	Regulation of anatomical structure morphogenesis	322	1067	2853	16563	1.7519781377467805	2.8018274116794234e-27	4.798738535416595e-25
GO:0050807	Regulation of synapse organization	122	270	2853	16563	2.623211434357596	4.718903348552366e-27	7.995243017541895e-25
GO:0007420	Brain development	214	616	2853	16563	2.016834637497098	8.476270440155597e-27	1.4208573758035291e-24
GO:0009888	Tissue development	442	1622	2853	16563	1.5820079065322892	1.1446488286451882e-26	1.8985506939960243e-24
GO:0045665	Negative regulation of neuron differentiation	118	259	2853	16563	2.644962222249289	1.3470429159925326e-26	2.21097450284316e-24
GO:0045666	Positive regulation of neuron differentiation	175	467	2853	16563	2.175496547081062	2.603506184064277e-26	4.229221334257816e-24
GO:0016477	Cell migration	261	816	2853	16563	1.85689599183522	3.118266387042635e-26	5.013726883737837e-24
GO:0051050	Positive regulation of transport	322	1086	2853	16563	1.7213265865338996	8.237768038809437e-26	1.3111364746214172e-23
GO:0006810	Transport	715	2978	2853	16563	1.3938581493871283	8.327726226189665e-26	1.3121998214607054e-23
GO:0042127	Regulation of cell proliferation	443	1642	2853	16563	1.566274234058386	9.908732160322217e-26	1.545860323269279e-23
GO:0051174	Regulation of phosphorus metabolic process	452	1693	2853	16563	1.5499536347786984	3.1630088813682698e-25	4.8862285238941004e-23
GO:0098660	Inorganic ion transmembrane transport	152	389	2853	16563	2.2684604759162994	3.7671421851789955e-25	5.762996059404411e-23
GO:0007626	Locomotory behavior	110	240	2853	16563	2.66083946722748	3.834482096679042e-25	5.809609076670352e-23
GO:0019220	Regulation of phosphate metabolic process	451	1692	2853	16563	1.547438555408889	5.243279582872665e-25	7.868414894030912e-23
GO:0065007	Biological regulation	2212	11547	2853	16563	1.1121239333016244	1.0735230424537664e-24	1.5870336240314138e-22
GO:0051234	Establishment of localization	740	3131	2853	16563	1.3721003727522443	1.077696247835002e-24	1.5870336240314138e-22
GO:0051270	Regulation of cellular component movement	305	1028	2853	16563	1.7224394145830522	1.7056351425400332e-24	2.4884900871299356e-22
GO:0007613	Memory	79	145	2853	16563	3.1629790782842018	1.8565411977019334e-24	2.6838091424026945e-22
GO:0032501	Multicellular organismal process	1450	7013	2853	16563	1.2003320257122005	6.947709712585842e-24	9.879555735542598e-22
GO:0051093	Negative regulation of developmental process	309	1054	2853	16563	1.7019825331170424	6.959641344451534e-24	9.879555735542598e-22
GO:0048870	Cell motility	282	935	2853	16563	1.7509539634609221	7.562798506433469e-24	1.0510433983180021e-21
GO:0051674	Localization of cell	282	935	2853	16563	1.7509539634609221	7.562798506433469e-24	1.0510433983180021e-21
GO:0030900	Forebrain development	147	380	2853	16563	2.2457994354972604	7.604172584137351e-24	1.0510433983180021e-21
GO:0001505	Regulation of neurotransmitter levels	141	358	2853	16563	2.2865111115027403	8.4747107997818e-24	1.1503787589990182e-21
GO:0031345	Negative regulation of cell projection organization	97	204	2853	16563	2.76044308364776	8.506135254596498e-24	1.1503787589990182e-21
GO:0003013	Circulatory system process	153	403	2853	16563	2.2040610249626225	8.541874392516668e-24	1.1503787589990182e-21
GO:0051130	Positive regulation of cellular component organization	360	1287	2853	16563	1.6239071128661033	9.385274112443072e-24	1.2532522388963175e-21
GO:0055085	Transmembrane transport	215	652	2853	16563	1.9143797616974056	1.4469079858125533e-23	1.9158763976847397e-21
GO:0040012	Regulation of locomotion	299	1015	2853	16563	1.7101821779511328	1.7882182306041297e-23	2.348079554969106e-21
GO:0008015	Blood circulation	149	392	2853	16563	2.2066702075151827	2.9272540215740465e-23	3.81196211718531e-21
GO:0006812	Cation transport	206	619	2853	16563	1.9320297144915053	3.683266190493226e-23	4.757149619967358e-21
GO:0050794	Regulation of cellular process	1993	10240	2853	16563	1.1299118731926918	5.081837055203107e-23	6.5101224779540936e-21
GO:0045596	Negative regulation of cell differentiation	244	781	2853	16563	1.8137441415532678	5.740360072393433e-23	7.294423682314785e-21
GO:0042325	Regulation of phosphorylation	408	1527	2853	16563	1.5511662834489186	9.430675933820007e-23	1.1887932855136148e-20
GO:0006935	Chemotaxis	164	454	2853	16563	2.097129383862107	9.60204457635549e-23	1.200789018965345e-20
GO:0001932	Regulation of protein phosphorylation	383	1410	2853	16563	1.5769462529177944	1.0119625420077688e-22	1.2555506908989302e-20
GO:0022604	Regulation of cell morphogenesis	179	515	2853	16563	2.0178228333996917	1.437776444478734e-22	1.7673240486194383e-20
GO:0010769	Regulation of cell morphogenesis involved in differentiation	134	341	2853	16563	2.2813275730748	1.4468794965533258e-22	1.7673240486194383e-20
GO:0050770	Regulation of axonogenesis	95	204	2853	16563	2.7035267314076	1.6562345015332567e-22	2.0074836185122714e-20
GO:0042330	Taxis	164	457	2853	16563	2.083362670182487	2.1262528290023355e-22	2.5575088417244122e-20
GO:0010977	Negative regulation of neuron projection development	85	174	2853	16563	2.836004447828662	5.393550240924944e-22	6.438346298958663e-20
GO:0030334	Regulation of cell migration	266	889	2853	16563	1.7370691439595287	5.741392492634671e-22	6.802039211010866e-20
GO:0031399	Regulation of protein modification process	454	1763	2853	16563	1.4949985476672314	7.457363102690985e-22	8.769079881276257e-20
GO:0060341	Regulation of cellular localization	282	962	2853	16563	1.7018107649022476	8.319609617385197e-22	9.710525091936189e-20
GO:0007612	Learning	83	169	2853	16563	2.8512061423976007	1.061096845057342e-21	1.22938992555651e-19
GO:0010976	Positive regulation of neuron projection development	139	367	2853	16563	2.198801204525854	1.3216478108473759e-21	1.5200879237607373e-19
GO:0048878	Chemical homeostasis	312	1103	2853	16563	1.642163185576475	2.129417611158084e-21	2.43139371732014e-19
GO:0009887	Animal organ morphogenesis	294	1025	2853	16563	1.665178118027237	3.7388980039154725e-21	4.2384040178198637e-19
GO:0050789	Regulation of biological process	2091	10908	2853	16563	1.112874352629795	5.242246058437984e-21	5.90014793877195e-19
GO:0008285	Negative regulation of cell proliferation	213	672	2853	16563	1.8401259951930296	5.6653743896241455e-21	6.331156330305508e-19
GO:0019725	Cellular homeostasis	245	817	2853	16563	1.7409297949591165	2.0547383206075148e-20	2.280036036465677e-18
GO:0051129	Negative regulation of cellular component organization	225	731	2853	16563	1.786908733121302	2.4944799368873698e-20	2.7486377877996005e-18
GO:0030001	Metal ion transport	162	468	2853	16563	2.009585052171803	2.5697430611074473e-20	2.8119056537409755e-18
GO:0042592	Homeostatic process	410	1581	2853	16563	1.5055293173203612	2.8916875683554574e-20	3.1423669665225476e-18
GO:2000145	Regulation of cell motility	272	939	2853	16563	1.681669091108625	3.0009752042298174e-20	3.2387922118526873e-18
GO:0043270	Positive regulation of ion transport	125	325	2853	16563	2.2328722801908922	3.3523525075714426e-20	3.5934026164491986e-18
GO:0010941	Regulation of cell death	427	1667	2853	16563	1.4870634705866397	4.757319410316474e-20	5.06493796948356e-18
GO:0050790	Regulation of catalytic activity	440	1731	2853	16563	1.4756822001954828	5.349847259005925e-20	5.657553238936668e-18
GO:0017158	Regulation of calcium ion-dependent exocytosis	70	136	2853	16563	2.9881084926084	5.689386533748473e-20	5.97651090748498e-18
GO:0031346	Positive regulation of cell projection organization	162	472	2853	16563	1.992554670373737	6.740994385313333e-20	7.034294604594847e-18
GO:0051588	Regulation of neurotransmitter transport	83	178	2853	16563	2.7070440340741264	7.061437270685614e-20	7.320201781196923e-18
GO:0055074	Calcium ion homeostasis	162	474	2853	16563	1.9841472667012738	1.0845054453976065e-19	1.1168988433418355e-17
GO:0032102	Negative regulation of response to external stimulus	126	333	2853	16563	2.196663540512121	1.1808861916418025e-19	1.2082612806298624e-17
GO:0009968	Negative regulation of signal transduction	315	1145	2853	16563	1.5971374650448389	1.4099388609826588e-19	1.4333165569357262e-17
GO:0072507	Divalent inorganic cation homeostasis	169	504	2853	16563	1.9466747617378535	1.5422281013220453e-19	1.5577492431109915e-17
GO:0023056	Positive regulation of signaling	462	1850	2853	16563	1.4497979367379998	1.9945349566293764e-19	2.001776261885929e-17
GO:0031323	Regulation of cellular metabolic process	1093	5160	2853	16563	1.2297241174121079	2.261485927271187e-19	2.255331250380512e-17
GO:0098662	Inorganic cation transmembrane transport	131	355	2853	16563	2.1422994327690645	2.6896643573300727e-19	2.6654742942421353e-17
GO:0009893	Positive regulation of metabolic process	783	3496	2853	16563	1.3002521132759206	3.712234444279795e-19	3.6558548836572954e-17
GO:0055082	Cellular chemical homeostasis	221	730	2853	16563	1.7575457701338173	5.045551680588128e-19	4.9380594926103804e-17
GO:0010647	Positive regulation of cell communication	458	1842	2853	16563	1.443487682546859	7.200142140541759e-19	7.00324936472324e-17
GO:0006874	Cellular calcium ion homeostasis	156	458	2853	16563	1.9774082900555152	7.644773340707479e-19	7.39010389751704e-17
GO:0050801	Ion homeostasis	232	782	2853	16563	1.7223383112674504	9.801795695980193e-19	9.417493584241457e-17
GO:0055080	Cation homeostasis	213	699	2853	16563	1.7690481670525264	1.0026372852510356e-18	9.574882244667011e-17
GO:0007155	Cell adhesion	192	609	2853	16563	1.830295307506229	1.0398525195172006e-18	9.87045551206779e-17
GO:0051952	Regulation of amine transport	62	118	2853	16563	3.050330606498066	1.969331405579014e-18	1.858129039383744e-16
GO:0030003	Cellular cation homeostasis	194	621	2853	16563	1.8136244414304121	2.0538405194636927e-18	1.926331253880322e-16
GO:0098771	Inorganic ion homeostasis	215	712	2853	16563	1.7530556244757143	2.1821017580485926e-18	2.0345193728740635e-16
GO:0055065	Metal ion homeostasis	196	630	2853	16563	1.8061455777544106	2.2378266183761423e-18	2.0729968705775806e-16
GO:0072503	Cellular divalent inorganic cation homeostasis	160	479	2853	16563	1.9391959677649502	2.2496824577569732e-18	2.0729968705775806e-16
GO:0016043	Cellular component organization	1043	4919	2853	16563	1.230962197483566	2.3808922596052082e-18	2.1811464729418179e-16
GO:0022610	Biological adhesion	193	620	2853	16563	1.8071859841932092	3.861877091972821e-18	3.5174333721511996e-16
GO:0006875	Cellular metal ion homeostasis	179	561	2853	16563	1.8523685547252071	4.247040126277877e-18	3.8460121419402595e-16
GO:0006873	Cellular ion homeostasis	196	635	2853	16563	1.791923959031935	5.784326957112978e-18	5.208207992184526e-16
GO:0098655	Cation transmembrane transport	134	380	2853	16563	2.047191322153965	9.074406214418445e-18	8.124171518215423e-16
GO:0060548	Negative regulation of cell death	286	1043	2853	16563	1.5919116275646668	1.3372404911698017e-17	1.190446238382066e-15
GO:0035295	Tube development	247	866	2853	16563	1.6558320766034538	1.5947464294720275e-17	1.4117089600668954e-15
GO:0040008	Regulation of growth	201	663	2853	16563	1.7600287385034095	1.8710299617704987e-17	1.6470290004255724e-15
GO:0010817	Regulation of hormone levels	175	552	2853	16563	1.8405016077660437	2.08245982932985e-17	1.8229621961528026e-15
GO:0009719	Response to endogenous stimulus	317	1191	2853	16563	1.5452001119507417	2.1172481145670305e-17	1.843175610012856e-15
GO:0021537	Telencephalon development	98	246	2853	16563	2.3127473861489403	2.5787495579969598e-17	2.2326020211735218e-15
GO:0051271	Negative regulation of cellular component movement	116	314	2853	16563	2.1446951582980036	2.841764084932409e-17	2.4468675784852438e-15
GO:1902531	Regulation of intracellular signal transduction	405	1616	2853	16563	1.4549594746540901	2.9383569529979916e-17	2.516287527629856e-15
GO:0051246	Regulation of protein metabolic process	604	2619	2853	16563	1.338870801379067	4.016354207689039e-17	3.420848283813848e-15
GO:0044093	Positive regulation of molecular function	363	1416	2853	16563	1.4882661426865567	4.447330397507991e-17	3.7675583372867424e-15
GO:1901214	Regulation of neuron death	130	373	2853	16563	2.023353433524186	8.350801861848251e-17	7.0365553442322405e-15
GO:0080090	Regulation of primary metabolic process	1052	5021	2853	16563	1.21636173287754	8.582422576036175e-17	7.193257049500106e-15
GO:0040013	Negative regulation of locomotion	119	330	2853	16563	2.093486919669885	9.307294273129573e-17	7.759525706968395e-15
GO:0006836	Neurotransmitter transport	72	158	2853	16563	2.6455296889350315	9.459272823754502e-17	7.844724309678931e-15
GO:0032101	Regulation of response to external stimulus	222	766	2853	16563	1.6825246476843119	1.108685048904627e-16	9.146361421774978e-15
GO:0045937	Positive regulation of phosphate metabolic process	297	1110	2853	16563	1.5533549322192857	1.1534489560124858e-16	9.417044145020072e-15
GO:0010562	Positive regulation of phosphorus metabolic process	297	1110	2853	16563	1.5533549322192857	1.1534489560124858e-16	9.417044145020072e-15
GO:0048638	Regulation of developmental growth	135	395	2853	16563	1.9841472667012738	1.330550949111505e-16	1.0806954281005147e-14
GO:0031325	Positive regulation of cellular metabolic process	713	3204	2853	16563	1.2919159279082009	1.7067959303745749e-16	1.3791786397390859e-14
GO:0010771	Negative regulation of cell morphogenesis involved in differentiation	53	99	2853	16563	3.10797777990207	2.0164300649186102e-16	1.6210657414756397e-14
GO:0001558	Regulation of cell growth	142	426	2853	16563	1.9351559761654398	2.3717714702657017e-16	1.897055992739932e-14
GO:0098693	Regulation of synaptic vesicle cycle	67	144	2853	16563	2.7011552167309265	2.9747506374943474e-16	2.3605191905721076e-14
GO:0044087	Regulation of cellular component biogenesis	260	945	2853	16563	1.5972715993746487	2.981172297542993e-16	2.3605191905721076e-14
GO:0071840	Cellular component organization or biogenesis	1056	5065	2853	16563	1.2103798879550074	3.615071784185893e-16	2.848134305170856e-14
GO:0001934	Positive regulation of protein phosphorylation	269	988	2853	16563	1.5806385351877632	3.633279111489592e-16	2.8482377591911194e-14
GO:0019222	Regulation of metabolic process	1172	5709	2853	16563	1.1918038907335238	3.7311663813682236e-16	2.9104944886742126e-14
GO:0042327	Positive regulation of phosphorylation	280	1040	2853	16563	1.5630105961336243	4.0745958021079684e-16	3.162729362256909e-14
GO:0032268	Regulation of cellular protein metabolic process	561	2425	2853	16563	1.343038147582035	4.1664300807534905e-16	3.2181587638447427e-14
GO:0001764	Neuron migration	66	142	2853	16563	2.698316079441951	5.29146620434153e-16	4.067201608868755e-14
GO:0019935	Cyclic-nucleotide-mediated signaling	72	163	2853	16563	2.5643784714830367	7.375583890604749e-16	5.6416056002067495e-14
GO:0043067	Regulation of programmed cell death	378	1515	2853	16563	1.4484929881000719	8.666962122023341e-16	6.597358558295738e-14
GO:0070887	Cellular response to chemical stimulus	585	2559	2853	16563	1.3271585534077166	1.0293507781608587e-15	7.797827024750312e-14
GO:0031644	Regulation of neurological system process	75	175	2853	16563	2.4880576836412795	1.3809128914631732e-15	1.0411026043437904e-13
GO:0090066	Regulation of anatomical structure size	165	531	2853	16563	1.80395896083219	1.3920018377293242e-15	1.0444653789095696e-13
GO:0035239	Tube morphogenesis	190	640	2853	16563	1.7234982912723447	1.5328285372467815e-15	1.1446814815828215e-13
GO:0021953	Central nervous system neuron differentiation	86	215	2853	16563	2.322187171398528	1.7394149911655166e-15	1.2928283969714643e-13
GO:1903532	Positive regulation of secretion by cell	151	473	2853	16563	1.8533311991605588	1.8310524620368444e-15	1.35454899738566e-13
GO:0007631	Feeding behavior	52	100	2853	16563	3.018843322818086	1.943465192825383e-15	1.4286350695180056e-13
GO:0017157	Regulation of exocytosis	94	245	2853	16563	2.2274040215455266	1.9493338830130812e-15	1.4286350695180056e-13
GO:0019932	Second-messenger-mediated signaling	107	295	2853	16563	2.105712096098665	2.125948240503867e-15	1.5475900567469676e-13
GO:0042981	Regulation of apoptotic process	372	1494	2853	16563	1.4455381990633405	2.1312879502068412e-15	1.5475900567469676e-13
GO:0010604	Positive regulation of macromolecule metabolic process	710	3223	2853	16563	1.2788961306957451	2.436781891809164e-15	1.7613014802402292e-13
GO:0008284	Positive regulation of cell proliferation	260	962	2853	16563	1.5690453860800864	3.124819606293154e-15	2.2483005724365858e-13
GO:0035556	Intracellular signal transduction	323	1261	2853	16563	1.487046900003419	3.5292899252366648e-15	2.527773697816097e-13
GO:0061387	Regulation of extent of cell growth	60	127	2853	16563	2.7427407536203083	4.4069741213131725e-15	3.142112725318175e-13
GO:0042493	Response to drug	226	808	2853	16563	1.6238066235645647	4.470030999163751e-15	3.1727152456677126e-13
GO:0001763	Morphogenesis of a branching structure	83	207	2853	16563	2.3277963191555293	4.5817928018327914e-15	3.237457810694139e-13
GO:0098609	Cell-cell adhesion	124	366	2853	16563	1.9668798446271685	4.978829629158078e-15	3.502295467260885e-13
GO:0051173	Positive regulation of nitrogen compound metabolic process	678	3066	2853	16563	1.2837923207829434	5.902174592769497e-15	4.1333584470341765e-13
GO:0010959	Regulation of metal ion transport	138	425	2853	16563	1.885069586194099	6.8639896394279794e-15	4.785658617188791e-13
GO:0045926	Negative regulation of growth	96	257	2853	16563	2.168579459671777	7.120404161839233e-15	4.942564245731312e-13
GO:0048589	Developmental growth	146	459	2853	16563	1.846619428236302	7.592061728309656e-15	5.246847221621721e-13
GO:0048640	Negative regulation of developmental growth	59	125	2853	16563	2.7401808622502632	7.850514340235454e-15	5.401770937078168e-13
GO:0051171	Regulation of nitrogen compound metabolic process	1013	4877	2853	16563	1.2058517554986203	8.047531252719901e-15	5.513258693439456e-13
GO:0009967	Positive regulation of signal transduction	374	1517	2853	16563	1.4312755473023226	8.636494961243077e-15	5.89113641144187e-13
GO:0051047	Positive regulation of secretion	162	528	2853	16563	1.781223114425007	8.868060546231646e-15	6.023018535645346e-13
GO:0050920	Regulation of chemotaxis	84	213	2853	16563	2.2894803098295347	9.7374700994725e-15	6.585120873707648e-13
GO:0042063	Gliogenesis	89	232	2853	16563	2.2270976105007434	1.101768881707096e-14	7.419047978230219e-13
GO:0051338	Regulation of transferase activity	228	825	2853	16563	1.60442022751171	1.3965201934859437e-14	9.363816463301284e-13
GO:0050433	Regulation of catecholamine secretion	41	71	2853	16563	3.352453310821818	1.568555194091623e-14	1.0472764488687161e-12
GO:0043408	Regulation of mapk cascade	207	731	2853	16563	1.643956034471598	1.769643997364022e-14	1.1765519184162403e-12
GO:0033555	Multicellular organismal response to stress	47	89	2853	16563	3.065808906059854	2.013424080031255e-14	1.3330051776912808e-12
GO:0046903	Secretion	150	481	2853	16563	1.8104369839385612	2.0409843803730376e-14	1.345597944834224e-12
GO:0043549	Regulation of kinase activity	204	721	2853	16563	1.6426011892000683	3.0344702291621264e-14	1.9922561417044844e-12
GO:0048729	Tissue morphogenesis	183	627	2853	16563	1.6944188690826578	3.066645186824266e-14	2.00502606675477e-12
GO:0031401	Positive regulation of protein modification process	309	1213	2853	16563	1.4788867188007937	3.2794694587198484e-14	2.135314060373911e-12
GO:0061138	Morphogenesis of a branching epithelium	78	195	2853	16563	2.322187171398528	3.559004363451976e-14	2.307787315016987e-12
GO:0030278	Regulation of ossification	86	225	2853	16563	2.2189788526697045	3.9534611321563074e-14	2.5444446946948443e-12
GO:0048646	Anatomical structure formation involved in morphogenesis	229	837	2853	16563	1.588353829899232	3.956266739863152e-14	2.5444446946948443e-12
GO:0051480	Regulation of cytosolic calcium ion concentration	118	351	2853	16563	1.9516957708335207	4.2754780018768034e-14	2.7385653201452352e-12
GO:0071495	Cellular response to endogenous stimulus	261	987	2853	16563	1.535184528204194	4.4507811392053754e-14	2.8393100571036074e-12
GO:0046883	Regulation of hormone secretion	105	299	2853	16563	2.038709473217771	4.5534436002388134e-14	2.893089145522701e-12
GO:1903305	Regulation of regulated secretory pathway	75	185	2853	16563	2.3535680791201297	4.8150543014824626e-14	3.0470205071670345e-12
GO:0032880	Regulation of protein localization	271	1035	2853	16563	1.5200790421473456	4.921497993751653e-14	3.101921755501792e-12
GO:0045859	Regulation of protein kinase activity	189	657	2853	16563	1.6700661164167496	5.1813242445380106e-14	3.252674347457587e-12
GO:0040007	Growth	146	469	2853	16563	1.807245879659835	5.374109199291354e-14	3.3603110576680108e-12
GO:0030516	Regulation of axon extension	54	113	2853	16563	2.7742944083079757	5.6430929571535686e-14	3.5145539812596356e-12
GO:0021543	Pallium development	67	157	2853	16563	2.4774926828614867	5.761435911205182e-14	3.5741317186165374e-12
GO:0043069	Negative regulation of programmed cell death	248	930	2853	16563	1.548124780932352	7.441366801932647e-14	4.598181046982459e-12
GO:0034765	Regulation of ion transmembrane transport	128	395	2853	16563	1.8812655565760228	7.87475146363608e-14	4.846971047363817e-12
GO:1904062	Regulation of cation transmembrane transport	117	352	2853	16563	1.9296583739604247	1.3374176445872868e-13	8.199879309634972e-12
GO:0034762	Regulation of transmembrane transport	149	487	2853	16563	1.7762109267884016	1.4023899437634553e-13	8.564906334837506e-12
GO:1902803	Regulation of synaptic vesicle transport	51	106	2853	16563	2.7931968335218142	2.0073476403384157e-13	1.2212269022707497e-11
GO:1905114	Cell surface receptor signaling pathway involved in cell-cell signaling	77	197	2853	16563	2.269142286772673	2.1841887851967638e-13	1.323702411090208e-11
GO:0030308	Negative regulation of cell growth	76	194	2853	16563	2.2743070235346408	2.722013847200807e-13	1.6425205205553774e-11
GO:0043066	Negative regulation of apoptotic process	242	912	2853	16563	1.5404860073422253	2.7311060251666493e-13	1.6425205205553774e-11
GO:0051272	Positive regulation of cellular component movement	170	583	2853	16563	1.6928465657707965	2.855628135456545e-13	1.7108795638931093e-11
GO:0051963	Regulation of synapse assembly	55	120	2853	16563	2.66083946722748	2.941692938574661e-13	1.7557672588303384e-11
GO:0050771	Negative regulation of axonogenesis	38	67	2853	16563	3.292653451982987	3.155942017936736e-13	1.876535033080345e-11
GO:0001655	Urogenital system development	109	324	2853	16563	1.9530740870558607	3.8189084132762125e-13	2.2622007469170407e-11
GO:0060627	Regulation of vesicle-mediated transport	168	576	2853	16563	1.69326147914476	3.8727136999102886e-13	2.285481264774772e-11
GO:0030335	Positive regulation of cell migration	160	541	2853	16563	1.7169590916070445	4.090364863381471e-13	2.4049208638918595e-11
GO:0019933	Camp-mediated signaling	60	138	2853	16563	2.524116490650574	4.4048807445632103e-13	2.580212114947305e-11
GO:0044089	Positive regulation of cellular component biogenesis	156	524	2853	16563	1.7283454138271488	4.4958155870135826e-13	2.6237246742434454e-11
GO:0040017	Positive regulation of locomotion	172	595	2853	16563	1.678219300338432	4.710755441947809e-13	2.739017472279396e-11
GO:0051954	Positive regulation of amine transport	32	51	2853	16563	3.6426465433702404	4.888146895518757e-13	2.831710685025333e-11
GO:0071804	Cellular potassium ion transport	57	128	2853	16563	2.585247436908517	4.955467193872889e-13	2.8497553494107706e-11
GO:0071805	Potassium ion transmembrane transport	57	128	2853	16563	2.585247436908517	4.955467193872889e-13	2.8497553494107706e-11
GO:1903522	Regulation of blood circulation	87	238	2853	16563	2.12216684781168	5.401084567938309e-13	3.094723255891052e-11
GO:0046928	Regulation of neurotransmitter secretion	58	132	2853	16563	2.550887423127171	6.245008459721184e-13	3.565311532602417e-11
GO:0008217	Regulation of blood pressure	76	197	2853	16563	2.239672906424976	6.868886549360947e-13	3.905475015202441e-11
GO:0051247	Positive regulation of protein metabolic process	391	1646	2853	16563	1.3790631591993079	6.890410955297827e-13	3.905475015202441e-11
GO:0015672	Monovalent inorganic cation transport	88	243	2853	16563	2.1023916778093668	7.305687856141309e-13	4.1260115967461866e-11
GO:0099175	Regulation of postsynapse organization	57	129	2853	16563	2.565206759103025	7.402419606248897e-13	4.165711633416567e-11
GO:0090087	Regulation of peptide transport	204	745	2853	16563	1.589685177735905	9.819142084782249e-13	5.5060577163670427e-11
GO:2001257	Regulation of cation channel activity	68	169	2853	16563	2.3359279238920103	1.1084387722914443e-12	6.193499906027052e-11
GO:0006813	Potassium ion transport	61	144	2853	16563	2.4592607197102465	1.1322188150101023e-12	6.304018327955541e-11
GO:0032270	Positive regulation of cellular protein metabolic process	368	1539	2853	16563	1.388182064773649	1.449579321032123e-12	8.04261315545886e-11
GO:0007188	Adenylate cyclase-modulating g protein-coupled receptor signaling pathway	74	192	2853	16563	2.2375240974412898	1.4560889283287263e-12	8.050383594272189e-11
GO:0051051	Negative regulation of transport	159	545	2853	16563	1.6937053222585594	1.6499147570497048e-12	9.090107282109161e-11
GO:0010033	Response to organic substance	590	2680	2853	16563	1.2780694320197123	1.6643202274404793e-12	9.137523980411022e-11
GO:2000300	Regulation of synaptic vesicle exocytosis	48	101	2853	16563	2.759034263047756	1.811352788803191e-12	9.910238157351349e-11
GO:0043085	Positive regulation of catalytic activity	266	1042	2853	16563	1.4820100470057782	1.9075031247353603e-12	1.0400182261749159e-10
GO:2000147	Positive regulation of cell motility	163	564	2853	16563	1.6778214048668443	2.0096327794981183e-12	1.0919235760879947e-10
GO:0032412	Regulation of ion transmembrane transporter activity	90	255	2853	16563	2.04898868064576	2.1476729166776296e-12	1.162916912305478e-10
GO:0050922	Negative regulation of chemotaxis	32	53	2853	16563	3.505188183243061	2.236329888343902e-12	1.2051030578650653e-10
GO:0009725	Response to hormone	172	605	2853	16563	1.650480138349367	2.240878314110961e-12	1.2051030578650653e-10
GO:0060429	Epithelium development	259	1010	2853	16563	1.4887289044361849	2.272229339889945e-12	1.2159654432990433e-10
GO:0030534	Adult behavior	72	186	2853	16563	2.247277907805027	2.276510793762885e-12	1.2159654432990433e-10
GO:0060560	Developmental growth involved in morphogenesis	57	132	2853	16563	2.506906605487047	2.3804788398622224e-12	1.2672028743144944e-10
GO:0007189	Adenylate cyclase-activating g protein-coupled receptor signaling pathway	54	122	2853	16563	2.5696333454000104	2.720543134657092e-12	1.4392278900434906e-10
GO:0014013	Regulation of gliogenesis	62	150	2853	16563	2.3995934104451453	2.721900813815829e-12	1.4392278900434906e-10
GO:0002791	Regulation of peptide secretion	154	526	2853	16563	1.6996997357194545	2.7538167394431173e-12	1.451233791418234e-10
GO:0043523	Regulation of neuron apoptotic process	93	268	2853	16563	2.014584019963275	2.811452123120118e-12	1.4766683701334565e-10
GO:0008306	Associative learning	48	102	2853	16563	2.73198490752768	2.8535507283505412e-12	1.4938006254690856e-10
GO:0045778	Positive regulation of ossification	47	99	2853	16563	2.756131238781081	3.2282526964552322e-12	1.6843568787432152e-10
GO:0070838	Divalent metal ion transport	87	245	2853	16563	2.061533509302775	3.4146268983356445e-12	1.775718681091576e-10
GO:0090276	Regulation of peptide hormone secretion	82	226	2853	16563	2.1064087174190185	3.937717934557723e-12	2.0410072860140144e-10
GO:0045936	Negative regulation of phosphate metabolic process	159	551	2853	16563	1.6752620701105534	4.3254555424821875e-12	2.2273268948657458e-10
GO:0010563	Negative regulation of phosphorus metabolic process	159	551	2853	16563	1.6752620701105534	4.3254555424821875e-12	2.2273268948657458e-10
GO:0072511	Divalent inorganic cation transport	87	246	2853	16563	2.053153291785284	4.4033702041296356e-12	2.2600620295267319e-10
GO:0060255	Regulation of macromolecule metabolic process	1061	5252	2853	16563	1.1728106382586814	4.606756726242827e-12	2.356774861539228e-10
GO:0090596	Sensory organ morphogenesis	99	295	2853	16563	1.9482756776987649	5.422529717652728e-12	2.765139183205632e-10
GO:0008361	Regulation of cell size	77	208	2853	16563	2.1491395696837334	5.60651622943537e-12	2.8497379428133266e-10
GO:0021761	Limbic system development	46	97	2853	16563	2.753108502173512	5.753104432123315e-12	2.914844583182221e-10
GO:0060078	Regulation of postsynaptic membrane potential	35	63	2853	16563	3.225259960275733	6.150873447124957e-12	3.106388234177819e-10
GO:0042326	Negative regulation of phosphorylation	136	452	2853	16563	1.746777960786503	6.376761306245548e-12	3.210179805192048e-10
GO:0010942	Positive regulation of cell death	193	708	2853	16563	1.5825639974573302	6.438360387148571e-12	3.23086766306688e-10
GO:0006816	Calcium ion transport	75	201	2853	16563	2.1662193763045967	6.730425870981041e-12	3.3667085856840724e-10
GO:0048732	Gland development	131	431	2853	16563	1.7645389759466772	7.194436256369823e-12	3.5866845431964597e-10
GO:0021954	Central nervous system neuron development	44	91	2853	16563	2.8070394379542645	7.215707305916593e-12	3.5866845431964597e-10
GO:1901215	Negative regulation of neuron death	87	248	2853	16563	2.0365956039483057	7.2743850511513345e-12	3.6044806682701754e-10
GO:0022898	Regulation of transmembrane transporter activity	91	264	2853	16563	2.001127202625625	7.377386870634609e-12	3.644059088419734e-10
GO:0048754	Branching morphogenesis of an epithelial tube	65	164	2853	16563	2.300947654586956	7.743146704481868e-12	3.8127738319537747e-10
GO:0032940	Secretion by cell	120	385	2853	16563	1.8094964971936582	8.984288232370501e-12	4.410137996182616e-10
GO:0010038	Response to metal ion	91	265	2853	16563	1.9935757792194908	9.364853386705707e-12	4.58267064640751e-10
GO:0030517	Negative regulation of axon extension	29	47	2853	16563	3.5820972324764524	1.1190219457949553e-11	5.458956284796009e-10
GO:0032409	Regulation of transporter activity	93	274	2853	16563	1.9704690414239332	1.1673451114373719e-11	5.677116333616874e-10
GO:0006937	Regulation of muscle contraction	62	155	2853	16563	2.322187171398528	1.4734030328567274e-11	7.139014344343942e-10
GO:0061061	Muscle structure development	139	470	2853	16563	1.7169362597042306	1.47700620438924e-11	7.139014344343942e-10
GO:0031324	Negative regulation of cellular metabolic process	524	2365	2853	16563	1.2862854945167321	1.5031858376819826e-11	7.243333102249235e-10
GO:0007166	Cell surface receptor signaling pathway	376	1605	2853	16563	1.3600348542770195	1.511804395719588e-11	7.262653007119984e-10
GO:0021675	Nerve development	40	80	2853	16563	2.9027339642481595	1.6939283371784383e-11	8.112835504231202e-10
GO:0071248	Cellular response to metal ion	61	152	2853	16563	2.329825944988655	1.8220118651026746e-11	8.699830593461468e-10
GO:0019233	Sensory perception of pain	47	103	2853	16563	2.649097015915796	1.8808860172041905e-11	8.953812982805568e-10
GO:0009628	Response to abiotic stimulus	252	997	2853	16563	1.4673800581555392	2.3269389925831365e-11	1.104384870666641e-9
GO:0007167	Enzyme linked receptor protein signaling pathway	157	553	2853	16563	1.6482069887412696	2.365915565188603e-11	1.1195114582785833e-9
GO:0002009	Morphogenesis of an epithelium	146	504	2853	16563	1.6817426935723465	2.4407825409967537e-11	1.1503639420863651e-9
GO:0060359	Response to ammonium ion	48	107	2853	16563	2.6043220613815268	2.445718858913069e-11	1.1503639420863651e-9
GO:0030155	Regulation of cell adhesion	186	686	2853	16563	1.5740773100587688	2.605421832759559e-11	1.2218342803212016e-9
GO:0001933	Negative regulation of protein phosphorylation	124	408	2853	16563	1.76440691944496	2.650189708063177e-11	1.2391406299688867e-9
GO:0051641	Cellular localization	454	2010	2853	16563	1.3112847957897158	2.7400032299148117e-11	1.2773441092830676e-9
GO:0050772	Positive regulation of axonogenesis	47	104	2853	16563	2.623624929224298	2.8625464603210263e-11	1.3305352382088026e-9
GO:0007204	Positive regulation of cytosolic calcium ion concentration	99	303	2853	16563	1.896836055845332	3.131886615237427e-11	1.4514452175381217e-9
GO:0009790	Embryo development	288	1176	2853	16563	1.421747247795017	3.514681061571313e-11	1.6240712459583338e-9
GO:0021879	Forebrain neuron differentiation	36	69	2853	16563	3.0289397887806886	3.565414335179224e-11	1.642696891211083e-9
GO:0030336	Negative regulation of cell migration	90	267	2853	16563	1.9568993017403322	3.818474437356569e-11	1.7541603996917625e-9
GO:0051223	Regulation of protein transport	189	703	2853	16563	1.5607872524691389	3.933744079293957e-11	1.8018606237626418e-9
GO:0072001	Renal system development	94	284	2853	16563	1.9215281171783591	4.4321022105734986e-11	2.024250276290047e-9
GO:0071310	Cellular response to organic substance	458	2037	2853	16563	1.3053040310512098	4.461052584629649e-11	2.0315839761852424e-9
GO:2000146	Negative regulation of cell motility	93	280	2853	16563	1.9282447048219917	4.531748810813266e-11	2.0578318735442257e-9
GO:0007187	G protein-coupled receptor signaling pathway, coupled to cyclic nucleotide second messenger	78	220	2853	16563	2.0583022655577863	4.869439968989972e-11	2.2048208503268676e-9
GO:0031400	Negative regulation of protein modification process	159	567	2853	16563	1.6279883609010843	4.970351638333032e-11	2.2440639187740285e-9
GO:0050773	Regulation of dendrite development	71	193	2853	16563	2.1356902742136716	5.211382010681674e-11	2.34616418120889e-9
GO:0010001	Glial cell differentiation	68	182	2853	16563	2.169075929328295	5.977704705606288e-11	2.683495528382857e-9
GO:0001964	Startle response	24	36	2853	16563	3.8703119523308795	6.269348263169215e-11	2.8064238801919694e-9
GO:0090257	Regulation of muscle system process	83	241	2853	16563	1.9993935189427159	6.442850803523247e-11	2.8759206830344424e-09
GO:0070201	Regulation of establishment of protein localization	195	735	2853	16563	1.5402261851112686	6.612079890073259e-11	2.943122678753795e-9
GO:0006820	Anion transport	124	414	2853	16563	1.7388358046703953	7.643626931333412e-11	3.392693790338608e-9
GO:0072359	Circulatory system development	219	850	2853	16563	1.4957617368714045	8.130090768257169e-11	3.5984786582985453e-9
GO:1902533	Positive regulation of intracellular signal transduction	251	1004	2853	16563	1.4513669821240798	8.393806337329728e-11	3.7047956990841602e-9
GO:0060562	Epithelial tube morphogenesis	112	363	2853	16563	1.7912187547977625	8.889566782951435e-11	3.912650944105189e-9
GO:0023061	Signal release	65	172	2853	16563	2.1939268334433764	8.926600301761349e-11	3.912744077022243e-9
GO:0098742	Cell-cell adhesion via plasma-membrane adhesion molecules	61	157	2853	16563	2.2556276664858315	8.951537646179561e-11	3.912744077022243e-9
GO:0048588	Developmental cell growth	45	100	2853	16563	2.6124605678233435	8.964273731072093e-11	3.912744077022243e-9
GO:0001501	Skeletal system development	141	490	2853	16563	1.670553016159145	9.037913188953798e-11	3.933988898296823e-9
GO:0008038	Neuron recognition	29	50	2853	16563	3.3671713985278657	9.617436455149362e-11	4.1747092623633195e-9
GO:0050708	Regulation of protein secretion	140	486	2853	16563	1.672357016439269	9.715043462298428e-11	4.205492852621877e-9
GO:2001023	Regulation of response to drug	49	114	2853	16563	2.495332706108067	9.923533313926713e-11	4.28397573774091e-9
GO:0050905	Neuromuscular process	56	139	2853	16563	2.338893553926575	1.0136463031374052e-10	4.363941201785817e-9
GO:0001755	Neural crest cell migration	30	53	2853	16563	3.28611392179037	1.057166081062896e-10	4.538900800901376e-9
GO:0009889	Regulation of biosynthetic process	702	3340	2853	16563	1.220191163414496	1.085064368424359e-10	4.6460215362126695e-9
GO:0071900	Regulation of protein serine/threonine kinase activity	125	421	2853	16563	1.7237137554917816	1.2005074509712367e-10	5.126394554188015e-9
GO:0050795	Regulation of behavior	43	94	2853	16563	2.655692775801508	1.216866980166056e-10	5.182208920669336e-9
GO:1902668	Negative regulation of axon guidance	20	27	2853	16563	4.300346613700977	1.2797217837798626e-10	5.4351957269593786e-9
GO:1902667	Regulation of axon guidance	27	45	2853	16563	3.4832807570977917	1.450590442517164e-10	6.1278695985906035e-9
GO:0014059	Regulation of dopamine secretion	27	45	2853	16563	3.4832807570977917	1.450590442517164e-10	6.1278695985906035e-9
GO:1901700	Response to oxygen-containing compound	337	1435	2853	16563	1.363374698190425	1.5058481004242721e-10	6.344291047696593e-9
GO:0043410	Positive regulation of mapk cascade	146	516	2853	16563	1.6426323983729896	1.56720412395475e-10	6.5851827683079995e-9
GO:0048841	Regulation of axon extension involved in axon guidance	22	32	2853	16563	3.99125920084122	1.588040721012536e-10	6.654988734307056e-9
GO:0008045	Motor neuron axon guidance	25	40	2853	16563	3.6284174553101995	2.0076967432466992e-10	8.391320313882822e-9
GO:0071277	Cellular response to calcium ion	37	76	2853	16563	2.8263462283468925	2.596058133492099e-10	1.0821716404612433e-8
GO:0001667	Ameboidal-type cell migration	64	172	2853	16563	2.160174112928863	2.6525476417080284e-10	1.1001804724232434e-8
GO:0072073	Kidney epithelium development	53	131	2853	16563	2.3487771008420224	2.6532244686224056e-10	1.1001804724232434e-8
GO:1901216	Positive regulation of neuron death	51	124	2853	16563	2.387732777042841	2.8521710297626215e-10	1.179571100156683e-8
GO:0014033	Neural crest cell differentiation	40	86	2853	16563	2.7002176411610788	2.871927992168959e-10	1.1836343886559385e-8
GO:0009891	Positive regulation of biosynthetic process	435	1943	2853	16563	1.299731625782758	2.877019552295643e-10	1.1836343886559385e-8
GO:0042596	Fear response	27	46	2853	16563	3.407557262378275	2.9355375460477673e-10	1.2045641956529861e-8
GO:0001822	Kidney development	87	264	2853	16563	1.913165567345378	2.9953468108056636e-10	1.2259137583860998e-8
GO:1901698	Response to nitrogen compound	230	915	2853	16563	1.4592979492395122	3.221580378019706e-10	1.3150891714107904e-8
GO:0007169	Transmembrane receptor protein tyrosine kinase signaling pathway	105	340	2853	16563	1.7928650955650398	3.24955844320157e-10	1.3230824906854558e-8
GO:0001657	Ureteric bud development	42	93	2853	16563	2.621824225772532	3.2848467962424473e-10	1.334003375474027e-8
GO:0035418	Protein localization to synapse	33	64	2853	16563	2.9934444006309144	3.503619634442443e-10	1.419191120306159e-8
GO:0031326	Regulation of cellular biosynthetic process	685	3269	2853	16563	1.216502150816757	3.6576848786939126e-10	1.477051405744549e-8
GO:0008016	Regulation of heart contraction	65	177	2853	16563	2.131951499165315	3.6652097458026187e-10	1.477051405744549e-8
GO:0001823	Mesonephros development	43	97	2853	16563	2.573557947683936	4.202023102744227e-10	1.6890632150495097e-8
GO:0016049	Cell growth	45	104	2853	16563	2.5119813152147534	4.387727871159889e-10	1.759222088189984e-8
GO:0048514	Blood vessel morphogenesis	106	346	2853	16563	1.7785537584410689	4.459271284565494e-10	1.783368975403515e-8
GO:0051347	Positive regulation of transferase activity	151	546	2853	16563	1.605541496708689	4.561482005957907e-10	1.81962713842731e-8
GO:0072164	Mesonephric tubule development	42	94	2853	16563	2.593932478689845	4.95513818615027e-10	1.9667030831025143e-8
GO:0072163	Mesonephric epithelium development	42	94	2853	16563	2.593932478689845	4.95513818615027e-10	1.9667030831025143e-8
GO:0050796	Regulation of insulin secretion	66	182	2853	16563	2.1052795784656984	4.979715119774073e-10	1.9714917372432176e-8
GO:0021872	Forebrain generation of neurons	39	84	2853	16563	2.6953958239447195	5.108776979610658e-10	2.0175187686146653e-8
GO:0003018	Vascular process in circulatory system	68	190	2853	16563	2.077746416514472	5.254629250347777e-10	2.0699298274432482e-8
GO:0048843	Negative regulation of axon extension involved in axon guidance	19	26	2853	16563	4.242457332362695	5.551499833270458e-10	2.181421019272883e-8
GO:0099504	Synaptic vesicle cycle	51	126	2853	16563	2.34983225677232	5.630864059895088e-10	2.207102611735495e-8
GO:0048483	Autonomic nervous system development	27	47	2853	16563	3.3350560440298005	5.766556788477185e-10	2.254680777072829e-8
GO:0032870	Cellular response to hormone stimulus	120	409	2853	16563	1.703315773641952	6.354007101936901e-10	2.4782200471589045e-8
GO:0033036	Macromolecule localization	417	1861	2853	16563	1.300849073714651	6.497021361828316e-10	2.5277423604525626e-8
GO:0010243	Response to organonitrogen compound	207	811	2853	16563	1.4817902110958547	6.588451378756422e-10	2.5570006988932253e-8
GO:0051172	Negative regulation of nitrogen compound metabolic process	480	2189	2853	16563	1.2730126110910158	6.739017744034006e-10	2.6090098917136076e-8
GO:0007423	Sensory organ development	159	586	2853	16563	1.575203755342858	7.178304124899829e-10	2.7722680905893773e-8
GO:0043405	Regulation of map kinase activity	93	294	2853	16563	1.8364235284018968	8.426675125738993e-10	3.2464332507645307e-8
GO:0009892	Negative regulation of metabolic process	581	2728	2853	16563	1.236428470108637	9.709326352719734e-10	3.7314598863367036e-8
GO:0007218	Neuropeptide signaling pathway	33	66	2853	16563	2.9027339642481595	9.928337211834407e-10	3.806345728634422e-8
GO:0035249	Synaptic transmission, glutamatergic	26	45	2853	16563	3.3542703586867626	1.0127051799474634e-9	3.8731057088427625e-8
GO:0014032	Neural crest cell development	37	79	2853	16563	2.7190166247387824	1.040452812808391e-9	3.969592002765573e-8
GO:0051259	Protein complex oligomerization	134	475	2853	16563	1.637753057723172	1.109554197706033e-9	4.223006157790812e-8
GO:0051336	Regulation of hydrolase activity	227	913	2853	16563	1.443418641586708	1.2165219561745185e-9	4.618972641793226e-8
GO:0006887	Exocytosis	63	174	2853	16563	2.101979767214185	1.3180676375419176e-9	4.9924980203721144e-8
GO:0048762	Mesenchymal cell differentiation	57	151	2853	16563	2.191468025988677	1.3270330156090794e-9	5.0144026923146915e-8
GO:0021766	Hippocampus development	35	73	2853	16563	2.783443527361249	1.3305551329900135e-9	5.015683547972163e-8
GO:0043068	Positive regulation of programmed cell death	171	647	2853	16563	1.5343663304062916	1.4095473475395326e-9	5.300772686200576e-8
GO:0031328	Positive regulation of cellular biosynthetic process	423	1903	2853	16563	1.2904429499495234	1.4443739513679543e-9	5.4188096075487754e-8
GO:0050678	Regulation of epithelial cell proliferation	107	357	2853	16563	1.7400141970563199	1.4653455037008157e-9	5.484429715395191e-8
GO:0032386	Regulation of intracellular transport	126	441	2853	16563	1.65870512242752	1.4884186875438113e-9	5.5575860804805293e-8
GO:0001568	Blood vessel development	128	450	2853	16563	1.6513330996611755	1.4969637441743457e-9	5.5762784200839636e-8
GO:0070848	Response to growth factor	123	428	2853	16563	1.6683938205725406	1.5845322762445065e-9	5.888555442637898e-8
GO:0003012	Muscle system process	77	231	2853	16563	1.9351559761654398	1.735849938328266e-9	6.435714700761998e-8
GO:0050919	Negative chemotaxis	25	43	2853	16563	3.375272051451349	1.775869145595173e-9	6.568631485244869e-8
GO:0044092	Negative regulation of molecular function	234	951	2853	16563	1.4284747584312711	1.8210193233465362e-9	6.719859830906644e-8
GO:0048511	Rhythmic process	67	191	2853	16563	2.036473042980384	1.843103433569691e-9	6.785462804382622e-8
GO:0051965	Positive regulation of synapse assembly	36	77	2853	16563	2.714244745790487	1.8532903952049587e-9	6.807062181175882e-8
GO:0048568	Embryonic organ development	136	488	2853	16563	1.6179172915481546	1.9795975039122004e-9	7.25407392305687e-8
GO:0033674	Positive regulation of kinase activity	132	471	2853	16563	1.6270101200881406	2.3332686252253237e-9	8.53023520363699e-8
GO:0051592	Response to calcium ion	50	127	2853	16563	2.28561729468359	2.56387585366306e-9	9.351618478279824e-8
GO:0035150	Regulation of tube size	59	161	2853	16563	2.127469613548341	2.575677819989414e-9	9.372968916760554e-8
GO:0048265	Response to pain	23	38	2853	16563	3.5138358514582984	2.662884769109701e-9	9.667989702041834e-8
GO:0021987	Cerebral cortex development	45	109	2853	16563	2.396752814516829	2.7187582387330623e-9	9.848154843153301e-8
GO:0007154	Cell communication	928	4639	2853	16563	1.1613438753275673	2.9765091266766933e-9	1.0734874056141394e-7
GO:2000027	Regulation of animal organ morphogenesis	71	209	2853	16563	1.9721924541781757	2.977178373125461e-9	1.0734874056141394e-7
GO:0048864	Stem cell development	38	85	2853	16563	2.595385662151296	3.220319986464895e-9	1.1585064389663779e-7
GO:0048598	Embryonic morphogenesis	161	607	2853	16563	1.5398358097000122	3.2945416554293838e-9	1.1825078101275808e-7
GO:0061448	Connective tissue development	73	218	2853	16563	1.944032838441428	3.6452364203543037e-9	1.3054088698982448e-7
GO:0043062	Extracellular structure organization	86	272	2853	16563	1.83555235974516	3.707474397312917e-9	1.3246864870399009e-7
GO:0001508	Action potential	39	89	2853	16563	2.543969092262432	4.056149562070412e-9	1.4459897884512102e-7
GO:0060384	Innervation	19	28	2853	16563	3.93942466576536	4.09170868573845e-9	1.4553736740672857e-7
GO:0016358	Dendrite development	52	136	2853	16563	2.21973773736624	4.132178291183029e-9	1.466457957976824e-7
GO:0021536	Diencephalon development	33	69	2853	16563	2.7765281397156314	4.245542137192378e-9	1.5033035383312425e-7
GO:0043065	Positive regulation of apoptotic process	168	642	2853	16563	1.519187869139224	4.308528253854415e-9	1.5221856434077136e-7
GO:0035265	Organ growth	46	114	2853	16563	2.3425572343055325	4.3695379325264915e-9	1.5402865593472018e-7
GO:0045860	Positive regulation of protein kinase activity	123	435	2853	16563	1.641546103919649	4.622918269929475e-9	1.62234572782358e-7
GO:0051222	Positive regulation of protein transport	123	435	2853	16563	1.641546103919649	4.622918269929475e-9	1.62234572782358e-7
GO:0048709	Oligodendrocyte differentiation	32	66	2853	16563	2.8147723289679125	4.742942518441338e-9	1.6607676725128925e-7
GO:0051248	Negative regulation of protein metabolic process	245	1015	2853	16563	1.4013198448094566	4.8518952576694556e-9	1.6951510770531622e-7
GO:0009636	Response to toxic substance	95	312	2853	16563	1.767690555151123	5.032592740265619e-9	1.7543930046098528e-7
GO:0030029	Actin filament-based process	138	504	2853	16563	1.58959240899304	5.211090234319435e-9	1.8126081417697865e-7
GO:0023052	Signaling	905	4524	2853	16563	1.161350237685493	5.447901307563456e-9	1.890805746768224e-7
GO:0035296	Regulation of tube diameter	58	160	2853	16563	2.104482124079916	5.588754237923472e-9	1.9269584360385154e-7
GO:0097746	Regulation of blood vessel diameter	58	160	2853	16563	2.104482124079916	5.588754237923472e-9	1.9269584360385154e-7
GO:0050880	Regulation of blood vessel size	58	160	2853	16563	2.104482124079916	5.588754237923472e-9	1.9269584360385154e-7
GO:0048584	Positive regulation of response to stimulus	480	2221	2853	16563	1.2546711416831309	5.631861126960196e-9	1.9375815671945808e-7
GO:0071242	Cellular response to ammonium ion	30	60	2853	16563	2.90273396424816	5.7019313001715e-9	1.9574146295599634e-7
GO:0045685	Regulation of glial cell differentiation	39	90	2853	16563	2.5157027690150717	5.975498404942686e-9	2.0468680079713458e-7
GO:0008344	Adult locomotory behavior	44	108	2853	16563	2.365190637535538	6.632423440445078e-9	2.2669652093512603e-7
GO:1902903	Regulation of supramolecular fiber organization	99	331	2853	16563	1.7363786251393827	6.753535671931701e-9	2.3033649693209486e-7
GO:0009605	Response to external stimulus	440	2014	2853	16563	1.2683246715682128	6.838378557321351e-9	2.3272641669052383e-7
GO:1902532	Negative regulation of intracellular signal transduction	141	520	2853	16563	1.5741749575345787	7.028295409287619e-9	2.386742473365194e-7
GO:0006357	Regulation of transcription by rna polymerase ii	431	1968	2853	16563	1.2714210758038178	7.333021097630393e-9	2.484869106136819e-7
GO:0045944	Positive regulation of transcription by rna polymerase ii	287	1229	2853	16563	1.3557113876960487	7.442985394466488e-9	2.5167193317727134e-7
GO:2001259	Positive regulation of cation channel activity	35	77	2853	16563	2.638849058407418	7.824129731963266e-9	2.639931738469918e-7
GO:0071702	Organic substance transport	321	1402	2853	16563	1.3292119864816823	8.122810516513955e-9	2.7348531048869744e-7
GO:0019226	Transmission of nerve impulse	31	64	2853	16563	2.812023527865405	8.484899592136134e-9	2.8506729823729013e-7
GO:0071363	Cellular response to growth factor stimulus	117	413	2853	16563	1.6446482993561002	9.7729648676688e-9	3.274996812856617e-7
GO:0010628	Positive regulation of gene expression	434	1988	2853	16563	1.2673908857984924	9.789449126454697e-9	3.274996812856617e-7
GO:1904951	Positive regulation of establishment of protein localization	126	454	2853	16563	1.6112091607721064	1.021228104480721e-8	3.4092142462505763e-7
GO:0032535	Regulation of cellular component size	109	378	2853	16563	1.6740635031907378	1.1014433626143786e-8	3.6692268635760594e-7
GO:0045055	Regulated exocytosis	46	117	2853	16563	2.282491664195134	1.155380124665387e-8	3.8407857857283765e-7
GO:0010035	Response to inorganic substance	126	455	2853	16563	1.6076680417374425	1.177154651607729e-8	3.904931756922734e-7
GO:0051216	Cartilage development	58	163	2853	16563	2.0657493242502243	1.2253423751032681e-8	4.056243656408024e-7
GO:0032269	Negative regulation of cellular protein metabolic process	229	946	2853	16563	1.405340545058834	1.2353641957306645e-8	4.080845625184084e-7
GO:0099643	Signal release from synapse	37	85	2853	16563	2.5270860394631036	1.2563264652198905e-8	4.132763280265097e-7
GO:0014031	Mesenchymal cell development	37	85	2853	16563	2.5270860394631036	1.2563264652198905e-8	4.132763280265097e-7
GO:0048592	Eye morphogenesis	60	171	2853	16563	2.037006290700463	1.260636375448147e-8	4.1383015349867606e-7
GO:0099173	Postsynapse organization	39	92	2853	16563	2.4610135783843097	1.2651416371512369e-8	4.1444567103101954e-7
GO:0097479	Synaptic vesicle localization	42	103	2853	16563	2.3672781844353925	1.408682461823248e-8	4.605105715964506e-7
GO:0043949	Regulation of camp-mediated signaling	30	62	2853	16563	2.8090973847562837	1.518281567876876e-8	4.953118564189634e-7
GO:1905475	Regulation of protein localization to membrane	64	188	2853	16563	1.9763295075732152	1.607829292392237e-8	5.234414495914149e-7
GO:0048863	Stem cell differentiation	61	176	2853	16563	2.0121224070356565	1.6215354158744205e-8	5.260483924492861e-7
GO:0043524	Negative regulation of neuron apoptotic process	62	180	2853	16563	1.9996611753709546	1.6225139222590153e-8	5.260483924492861e-7
GO:0007214	Gamma-aminobutyric acid signaling pathway	18	27	2853	16563	3.8703119523308795	1.628009613050818e-8	5.267463546784752e-7
GO:0006793	Phosphorus metabolic process	350	1560	2853	16563	1.3025088301113539	1.6964781146781333e-8	5.477747060037571e-7
GO:0061458	Reproductive system development	120	431	2853	16563	1.6163715810198571	1.8797479889712777e-8	6.057093877754687e-7
GO:1903508	Positive regulation of nucleic acid-templated transcription	346	1541	2853	16563	1.3034989638285055	1.9035519535751696e-8	6.12127921071101e-7
GO:0014014	Negative regulation of gliogenesis	27	53	2853	16563	2.957502529611333	1.9639900252910516e-8	6.302767989513461e-7
GO:0030902	Hindbrain development	56	157	2853	16563	2.0707401528394516	1.9712293421831936e-8	6.313142427800931e-7
GO:0001666	Response to hypoxia	65	193	2853	16563	1.955209405970263	2.0028156038148295e-8	6.401291170245491e-7
GO:0048608	Reproductive structure development	119	427	2853	16563	1.6179172915481548	2.031010783782733e-8	6.473067669041943e-7
GO:0046887	Positive regulation of hormone secretion	58	165	2853	16563	2.0407099385017364	2.0334889231298864e-8	6.473067669041943e-7
GO:1902680	Positive regulation of rna biosynthetic process	346	1542	2853	16563	1.3026536337611716	2.048622674753562e-8	6.508094251228202e-7
GO:0034767	Positive regulation of ion transmembrane transport	62	181	2853	16563	1.9886133235733252	2.0579884426767372e-8	6.52469293586667e-7
GO:0006796	Phosphate-containing compound metabolic process	345	1537	2853	16563	1.3031141413996294	2.070021408103815e-8	6.53653854258353e-7
GO:0045893	Positive regulation of transcription, dna-templated	345	1537	2853	16563	1.3031141413996294	2.070021408103815e-8	6.53653854258353e-7
GO:0099565	Chemical synaptic transmission, postsynaptic	25	47	2853	16563	3.0880148555831486	2.1197586563106255e-8	6.680207429497305e-7
GO:0030198	Extracellular matrix organization	76	239	2853	16563	1.8460902199402522	2.2481539571537782e-8	7.070690998577262e-7
GO:0099003	Vesicle-mediated transport in synapse	53	146	2853	16563	2.1074643850020887	2.3703167957947294e-8	7.440056125764452e-7
GO:0090287	Regulation of cellular response to growth factor stimulus	83	269	2853	16563	1.7912782084207977	2.3953157708084207e-8	7.503576660164669e-7
GO:0051924	Regulation of calcium ion transport	85	278	2853	16563	1.77505314360499	2.5907590329133426e-8	8.099720254288798e-7
GO:0006936	Muscle contraction	61	178	2853	16563	1.9895142901026714	2.617896084412537e-8	8.168354178631356e-7
GO:0007416	Synapse assembly	35	80	2853	16563	2.5398922187171395	2.6393892435302378e-8	8.219141563301573e-7
GO:0008283	Cell proliferation	151	577	2853	16563	1.5192819015648948	2.646576486964101e-8	8.225267397454307e-7
GO:0050878	Regulation of body fluid levels	96	326	2853	16563	1.7095856476553577	2.6726784475039766e-8	8.290038247503968e-7
GO:0048705	Skeletal system morphogenesis	80	257	2853	16563	1.807149549726481	2.78088920287295e-8	8.6087369685008e-7
GO:0048167	Regulation of synaptic plasticity	102	353	2853	16563	1.6775006478941206	2.8939338740677535e-8	8.941120794840312e-7
GO:0010557	Positive regulation of macromolecule biosynthetic process	395	1801	2853	16563	1.273270311913407	2.9724505128740254e-8	9.165734389697851e-7
GO:0017156	Calcium ion regulated exocytosis	34	77	2853	16563	2.563453371024349	3.1387904795843886e-8	9.659750309924065e-7
GO:0007269	Neurotransmitter secretion	36	84	2853	16563	2.4880576836412795	3.228721992735837e-8	9.897854560221514e-7
GO:0031646	Positive regulation of neurological system process	36	84	2853	16563	2.4880576836412795	3.228721992735837e-8	9.897854560221514e-7
GO:0010770	Positive regulation of cell morphogenesis involved in differentiation	63	187	2853	16563	1.9558528315254982	3.244267806432502e-8	9.926199577855715e-7
GO:0006355	Regulation of transcription, dna-templated	548	2613	2853	16563	1.2175263776563272	3.573300967422536e-8	1.091172545420095e-6
GO:0001662	Behavioral fear response	23	42	2853	16563	3.1791848179860795	3.772548269014069e-8	1.1497880672118895e-6
GO:0035235	Ionotropic glutamate receptor signaling pathway	13	16	2853	16563	4.7169426919032595	3.824211993354931e-8	1.1632839455462094e-6
GO:0048562	Embryonic organ morphogenesis	94	320	2853	16563	1.7053562039957937	4.244039512030266e-8	1.288503479596549e-6
GO:1901342	Regulation of vasculature development	98	338	2853	16563	1.6832421804515956	4.4810833525738626e-8	1.3578544305097377e-6
GO:0009890	Negative regulation of biosynthetic process	327	1456	2853	16563	1.3038379207543245	4.80974410660135e-8	1.4546475602249035e-6
GO:0001503	Ossification	65	197	2853	16563	1.9155097226003084	4.877777574794178e-8	1.472397341878005e-6
GO:0045667	Regulation of osteoblast differentiation	51	141	2853	16563	2.0998501017965414	4.9597868417693714e-8	1.4942898903586996e-6
GO:1990138	Neuron projection extension	31	68	2853	16563	2.64661037916744	5.102292828993119e-8	1.534290612718408e-6
GO:1904064	Positive regulation of cation transmembrane transport	57	165	2853	16563	2.0055252843896376	5.3958811066890373e-8	1.6194837828209362e-6
GO:1903524	Positive regulation of blood circulation	37	89	2853	16563	2.4135091388130765	5.510308513897315e-8	1.6506831036783268e-6
GO:0060350	Endochondral bone morphogenesis	33	75	2853	16563	2.5544058885383802	5.540071071778412e-8	1.6564497130552644e-6
GO:0008277	Regulation of g protein-coupled receptor signaling pathway	47	126	2853	16563	2.1655316876137065	5.550853713552741e-8	1.6565303402358056e-6
GO:1903506	Regulation of nucleic acid-templated transcription	548	2621	2853	16563	1.2138101582663041	5.5857338295593135e-8	1.6637884301014386e-6
GO:0035094	Response to nicotine	20	34	2853	16563	3.4149811344096	5.8016032735813794e-8	1.7248275996570151e-6
GO:0070372	Regulation of erk1 and erk2 cascade	91	309	2853	16563	1.7097009109811168	6.097184859247604e-8	1.809290806537938e-6
GO:0051668	Localization within membrane	50	138	2853	16563	2.1034304088754783	6.279829177751587e-8	1.8599862472524766e-6
GO:0045892	Negative regulation of transcription, dna-templated	264	1139	2853	16563	1.3456045066927378	6.396411631051008e-8	1.8904911272287735e-6
GO:0071526	Semaphorin-plexin signaling pathway	21	37	2853	16563	3.294995310768182	6.406817680650918e-8	1.8904911272287735e-6
GO:0001944	Vasculature development	130	486	2853	16563	1.5529029438364639	6.459658221208486e-8	1.9025202727398526e-6
GO:0048639	Positive regulation of developmental growth	69	215	2853	16563	1.8631501724011443	6.586684562457074e-8	1.9327074236617526e-6
GO:0060348	Bone development	69	215	2853	16563	1.8631501724011443	6.586684562457074e-8	1.9327074236617526e-6
GO:0007215	Glutamate receptor signaling pathway	22	40	2853	16563	3.1930073606729756	6.727492014977645e-8	1.9703548639405717e-6
GO:0007156	Homophilic cell adhesion via plasma membrane adhesion molecules	34	79	2853	16563	2.4985558173275297	6.8172962215239e-8	1.990981727318879e-6
GO:0060485	Mesenchyme development	68	211	2853	16563	1.870956488804501	6.823190535966203e-8	1.990981727318879e-6
GO:0043087	Regulation of gtpase activity	82	271	2853	16563	1.756636052164938	7.531870173858162e-8	2.1937093961087443e-6
GO:0016055	Wnt signaling pathway	51	143	2853	16563	2.070481568904282	8.374028015139636e-8	2.434493716504709e-6
GO:0022612	Gland morphogenesis	45	120	2853	16563	2.17705047318612	8.807823549121379e-8	2.5511925673438522e-6
GO:0044070	Regulation of anion transport	45	120	2853	16563	2.17705047318612	8.807823549121379e-8	2.5511925673438522e-6
GO:1903507	Negative regulation of nucleic acid-templated transcription	264	1143	2853	16563	1.3408954795477064	8.864066420871832e-8	2.5627723778656413e-6
GO:0060998	Regulation of dendritic spine development	38	94	2853	16563	2.346891290243193	8.919549410065813e-8	2.5740904771869416e-6
GO:2001141	Regulation of rna biosynthetic process	548	2630	2853	16563	1.2096564352912484	9.153964089835607e-8	2.6369106428435038e-06
GO:1901135	Carbohydrate derivative metabolic process	198	815	2853	16563	1.4104081593156703	9.50924301108887e-8	2.7342544183526883e-6
GO:1902679	Negative regulation of rna biosynthetic process	264	1144	2853	16563	1.3397233681145353	9.6108803147698e-8	2.7572309370216624e-6
GO:0051649	Establishment of localization in cell	316	1409	2853	16563	1.3020070017067686	9.624148095207935e-8	2.7572309370216624e-6
GO:0035637	Multicellular organismal signaling	42	109	2853	16563	2.236969293549041	9.671058656321614e-8	2.762391487457926e-6
GO:1900449	Regulation of glutamate receptor signaling pathway	26	53	2853	16563	2.847965398884987	9.6772234630753e-8	2.762391487457926e-6
GO:0021885	Forebrain cell migration	32	73	2853	16563	2.544862653587428	9.773700422922538e-8	2.784886031898561e-6
GO:1905330	Regulation of morphogenesis of an epithelium	43	113	2853	16563	2.2091603621711657	1.0407232889679073e-7	2.9600499754995154e-6
GO:0097120	Receptor localization to synapse	25	50	2853	16563	2.9027339642481595	1.0579110524990077e-7	3.0035143160769123e-6
GO:0060349	Bone morphogenesis	44	117	2853	16563	2.18325289618665	1.1087188040821279e-7	3.1421011143744766e-6
GO:0060537	Muscle tissue development	98	344	2853	16563	1.6538833052111608	1.1435629457528993e-7	3.2350307605437047e-6
GO:0043583	Ear development	74	239	2853	16563	1.797508898362877	1.159471406680194e-7	3.2741560851361675e-6
GO:0022029	Telencephalon cell migration	31	70	2853	16563	2.5709929397626556	1.1615912753032767e-7	3.2742743694013833e-6
GO:0002209	Behavioral defense response	23	44	2853	16563	3.034676417168531	1.1908677568104886e-7	3.3508041507255123e-6
GO:0045927	Positive regulation of growth	90	309	2853	16563	1.6909129888824233	1.2550769475387647e-7	3.5251778007786656e-6
GO:0098700	Neurotransmitter loading into synaptic vesicle	9	9	2853	16563	5.80546792849632	1.321063003276213e-7	3.703912765591332e-6
GO:0010810	Regulation of cell-substrate adhesion	66	206	2853	16563	1.8600042877706653	1.3545219941872816e-7	3.790977453358614e-6
GO:0045669	Positive regulation of osteoblast differentiation	30	67	2853	16563	2.5994632515655165	1.3725173573889083e-7	3.834531205740608e-6
GO:0198738	Cell-cell signaling by wnt	51	145	2853	16563	2.0419232024366365	1.3924079201995468e-7	3.883216212138807e-6
GO:0001525	Angiogenesis	70	223	2853	16563	1.8223441928015351	1.4020378277918985e-7	3.903164320232675e-6
GO:0032970	Regulation of actin filament-based process	105	377	2853	16563	1.6169075132416806	1.4182646107716882e-7	3.941374862774161e-6
GO:0034764	Positive regulation of transmembrane transport	73	236	2853	16563	1.7957591473738614	1.4704913596733473e-7	4.079319076474108e-6
GO:0033673	Negative regulation of kinase activity	68	215	2853	16563	1.8361479959895335	1.52945651432029e-7	4.235438716369914e-6
GO:1903531	Negative regulation of secretion by cell	72	232	2853	16563	1.801696943326444	1.5453412811321753e-7	4.271359450214405e-6
GO:0032411	Positive regulation of transporter activity	45	122	2853	16563	2.141361121166675	1.5478493660420292e-7	4.271359450214405e-6
GO:0070588	Calcium ion transmembrane transport	46	126	2853	16563	2.119456545324053	1.6107712580484272e-7	4.428302046596377e-6
GO:0072006	Nephron development	46	126	2853	16563	2.119456545324053	1.6107712580484272e-7	4.428302046596377e-6
GO:0050806	Positive regulation of synaptic transmission	91	315	2853	16563	1.6771351793433813	1.6131531222607858e-7	4.428302046596377e-6
GO:0051254	Positive regulation of rna metabolic process	359	1639	2853	16563	1.271606459017803	1.6306309929107316e-7	4.468496096572939e-6
GO:0007271	Synaptic transmission, cholinergic	15	22	2853	16563	3.9582735876111275	1.6959103498426657e-7	4.639315865012307e-6
GO:0045165	Cell fate commitment	80	267	2853	16563	1.7394660459914066	1.7101647178977248e-7	4.670201986120355e-6
GO:0080134	Regulation of response to stress	297	1320	2853	16563	1.306230283911672	1.7883325173899586e-7	4.872796507924007e-6
GO:0008104	Protein localization	357	1630	2853	16563	1.2715043254436724	1.7905370172545538e-7	4.872796507924007e-6
GO:0010605	Negative regulation of macromolecule metabolic process	515	2466	2853	16563	1.2124152405416078	1.85879064798752e-7	5.035629378156009e-6
GO:0032414	Positive regulation of ion transmembrane transporter activity	43	115	2853	16563	2.1707401819594936	1.8599583030315398e-7	5.035629378156009e-6
GO:0048814	Regulation of dendrite morphogenesis	43	115	2853	16563	2.1707401819594936	1.8599583030315398e-7	5.035629378156009e-6
GO:0099601	Regulation of neurotransmitter receptor activity	28	61	2853	16563	2.6648049507851956	1.8767074023246414e-7	5.072260469713443e-6
GO:0014015	Positive regulation of gliogenesis	36	89	2853	16563	2.348279162088399	1.8986500860584684e-7	5.117949048138673e-6
GO:0098661	Inorganic anion transmembrane transport	24	48	2853	16563	2.90273396424816	1.9001080111449663e-7	5.117949048138673e-6
GO:0050805	Negative regulation of synaptic transmission	32	75	2853	16563	2.476999649491763	2.0978063730691805e-7	5.64080802396776e-6
GO:0098739	Import across plasma membrane	37	93	2853	16563	2.3097022941329444	2.1314970523845832e-7	5.721635273326044e-6
GO:0021877	Forebrain neuron fate commitment	11	13	2853	16563	4.912319016419963	2.1592189967828924e-7	5.786192811617013e-6
GO:0014706	Striated muscle tissue development	93	326	2853	16563	1.6561610961661277	2.2323865854133797e-7	5.972107882234062e-6
GO:0098656	Anion transmembrane transport	49	139	2853	16563	2.046531859685753	2.246523199349973e-7	5.999740008840258e-6
GO:1905809	Negative regulation of synapse organization	16	25	2853	16563	3.715499474237645	2.442311116095947e-7	6.511589891086944e-6
GO:0006821	Chloride transport	33	79	2853	16563	2.425068881523779	2.4867967153210737e-7	6.618995919478743e-6
GO:0002090	Regulation of receptor internalization	31	72	2853	16563	2.4995764692136935	2.529741700686553e-7	6.7219460333419925e-6
GO:0031327	Negative regulation of cellular biosynthetic process	315	1418	2853	16563	1.2896490814360653	2.639992496081641e-7	6.994015803425366e-6
GO:1902905	Positive regulation of supramolecular fiber organization	58	176	2853	16563	1.9131655673453782	2.641009965753692e-7	6.994015803425366e-6
GO:0030036	Actin cytoskeleton organization	119	446	2853	16563	1.5489925638813051	2.6802872428330624e-7	7.0861218263960675e-6
GO:0033605	Positive regulation of catecholamine secretion	14	20	2853	16563	4.0638275499474235	2.6885183730227347e-7	7.095977220053473e-6
GO:0010469	Regulation of signaling receptor activity	46	128	2853	16563	2.0863400368033647	2.746380835246673e-7	7.2365757225722115e-6
GO:0030307	Positive regulation of cell growth	63	197	2853	16563	1.8565709619049147	2.7850719589799687e-7	7.32627359893946e-6
GO:1900271	Regulation of long-term synaptic potentiation	25	52	2853	16563	2.791090350238615	2.798501149488159e-7	7.337702524203806e-6
GO:2000112	Regulation of cellular macromolecule biosynthetic process	616	3019	2853	16563	1.1845539065762614	2.798730225960835e-7	7.337702524203806e-6
GO:0080135	Regulation of cellular response to stress	166	670	2853	16563	1.4383696658662524	2.845612848843188e-7	7.448226189239554e-6
GO:0048593	Camera-type eye morphogenesis	48	136	2853	16563	2.04898868064576	2.8533623200207494e-7	7.456124390807123e-6
GO:0010556	Regulation of macromolecule biosynthetic process	633	3112	2853	16563	1.1808679944531395	2.8728593963046326e-7	7.494643295955646e-6
GO:0050921	Positive regulation of chemotaxis	49	140	2853	16563	2.0319137749737117	2.884251094078377e-7	7.511924708990577e-6
GO:0061333	Renal tubule morphogenesis	32	76	2853	16563	2.4444075488405557	3.0284713003744146e-7	7.874525128712815e-6
GO:0007422	Peripheral nervous system development	30	69	2853	16563	2.524116490650574	3.0370875356421827e-7	7.883918994911676e-6
GO:0045935	Positive regulation of nucleobase-containing compound metabolic process	394	1832	2853	16563	1.2485558754517196	3.0547788391759545e-7	7.916801014620972e-6
GO:2000177	Regulation of neural precursor cell proliferation	42	113	2853	16563	2.157784539795092	3.11356404313279e-7	8.055899610450471e-6
GO:0097480	Establishment of synaptic vesicle localization	38	98	2853	16563	2.251099809008777	3.2145342284655854e-7	8.289920759072379e-6
GO:0048489	Synaptic vesicle transport	38	98	2853	16563	2.251099809008777	3.2145342284655854e-7	8.289920759072379e-6
GO:0051048	Negative regulation of secretion	78	262	2853	16563	1.7283454138271488	3.2393766905299217e-7	8.34033635828104e-6
GO:0006941	Striated muscle contraction	39	102	2853	16563	2.21973773736624	3.474601247716702e-7	8.931368982099848e-6
GO:0072358	Cardiovascular system development	130	500	2853	16563	1.509421661409043	3.645192525857304e-7	9.354608897383313e-6
GO:0045823	Positive regulation of heart contraction	22	43	2853	16563	2.9702394052771868	3.6662144171534656e-7	9.379564378204823e-6
GO:1990778	Protein localization to cell periphery	73	241	2853	16563	1.7585027335279309	3.6668221469659014e-7	9.379564378204823e-6
GO:1903827	Regulation of cellular protein localization	135	524	2853	16563	1.4956835311965708	3.802644438519117e-7	9.711226647932858e-6
GO:0021884	Forebrain neuron development	20	37	2853	16563	3.138090772160173	3.900926758211296e-7	9.946100797594724e-6
GO:0007010	Cytoskeleton organization	230	990	2853	16563	1.3487450742971248	3.9542382321006584e-7	1.0065740197610674e-5
GO:0060070	Canonical wnt signaling pathway	34	84	2853	16563	2.3498322567723195	4.0448647197999653e-7	1.0279827966110977e-5
GO:0090278	Negative regulation of peptide hormone secretion	28	63	2853	16563	2.5802079682205865	4.308733228161981e-7	1.0932803458316962e-5
GO:0003002	Regionalization	98	353	2853	16563	1.6117163087610178	4.3158175564489914e-7	1.093317318922295e-5
GO:0015711	Organic anion transport	92	326	2853	16563	1.6383529123363845	4.3968242498957216e-7	1.1120507175859854e-5
GO:0060401	Cytosolic calcium ion transport	35	88	2853	16563	2.308992926106491	4.540414075035188e-7	1.1465273169924594e-5
GO:0045785	Positive regulation of cell adhesion	111	413	2853	16563	1.5603073609275824	4.54826029795199e-7	1.1466710002372721e-5
GO:0010632	Regulation of epithelial cell migration	69	225	2853	16563	1.7803434980722046	4.5712275329104564e-7	1.1506203232599052e-5
GO:0001936	Regulation of endothelial cell proliferation	46	130	2853	16563	2.0542424977756206	4.60251829441913e-7	1.1566488160312956e-5
GO:0051348	Negative regulation of transferase activity	74	247	2853	16563	1.739289986675011	4.91513689531319e-7	1.2332454149593938e-5
GO:0000122	Negative regulation of transcription by rna polymerase ii	204	863	2853	16563	1.3723238208728266	5.127274026783626e-7	1.2844269767890238e-5
GO:0098659	Inorganic cation import across plasma membrane	31	74	2853	16563	2.4320203484241345	5.287843444375464e-7	1.320452442995629e-5
GO:0099587	Inorganic ion import across plasma membrane	31	74	2853	16563	2.4320203484241345	5.287843444375464e-7	1.320452442995629e-5
GO:0003015	Heart process	37	96	2853	16563	2.2375240974412898	5.460201568706168e-7	1.3613353816155551e-5
GO:0048660	Regulation of smooth muscle cell proliferation	54	163	2853	16563	1.9232838536122776	5.577203416841998e-7	1.388309545642644e-5
GO:0048839	Inner ear development	65	209	2853	16563	1.8055283031208649	5.600006436459391e-7	1.3917870886323444e-5
GO:0002792	Negative regulation of peptide secretion	53	159	2853	16563	1.93515597616544	5.691581564779681e-7	1.4123189089170622e-5
GO:0042692	Muscle cell differentiation	79	270	2853	16563	1.698636912411886	5.927005154261494e-7	1.4684248461587791e-5
GO:0051260	Protein homooligomerization	81	279	2853	16563	1.6854584308537703	6.08855563368649e-7	1.506081179277834e-5
GO:0007618	Mating	22	44	2853	16563	2.90273396424816	6.141561077496461e-7	1.5168115658011242e-5
GO:0007389	Pattern specification process	118	448	2853	16563	1.52911878473787	6.183638634136524e-7	1.5248136769654023e-5
GO:0002793	Positive regulation of peptide secretion	93	333	2853	16563	1.6213468989494224	6.336361041085448e-7	1.5600318894434906e-5
GO:0007632	Visual behavior	30	71	2853	16563	2.4530146176745014	6.434202044174435e-7	1.5816493230898062e-5
GO:1901699	Cellular response to nitrogen compound	143	567	2853	16563	1.4641656327600947	6.538590295829266e-7	1.6048063441025192e-5
GO:0003416	Endochondral bone growth	21	41	2853	16563	2.973532353620066	6.595860553039e-7	1.6163448636739586e-5
GO:0040036	Regulation of fibroblast growth factor receptor signaling pathway	18	32	2853	16563	3.2655757097791795	6.792450345189985e-7	1.661935405111158e-5
GO:0071901	Negative regulation of protein serine/threonine kinase activity	41	112	2853	16563	2.12521593811026	6.850399702992239e-7	1.6735154747294373e-5
GO:0007616	Long-term memory	20	38	2853	16563	3.0555094360506945	6.902428408813852e-7	1.6810133607060257e-5
GO:1902476	Chloride transmembrane transport	20	38	2853	16563	3.0555094360506945	6.902428408813852e-7	1.6810133607060257e-5
GO:0019228	Neuronal action potential	19	35	2853	16563	3.1515397326122874	6.99173070954345e-7	1.6975146500812965e-5
GO:0035567	Non-canonical wnt signaling pathway	19	35	2853	16563	3.1515397326122874	6.99173070954345e-7	1.6975146500812965e-5
GO:0051705	Multi-organism behavior	31	75	2853	16563	2.3995934104451453	7.535369562795786e-7	1.826689510784203e-5
GO:0050680	Negative regulation of epithelial cell proliferation	48	140	2853	16563	1.9904461469130237	7.596063338373633e-7	1.8385740402880696e-5
GO:0006940	Regulation of smooth muscle contraction	29	68	2853	16563	2.47586132244696	7.799748472646349e-7	1.884979090237554e-5
GO:1901652	Response to peptide	92	330	2853	16563	1.6184940891565496	7.903434971282937e-7	1.907112172167002e-5
GO:0050730	Regulation of peptidyl-tyrosine phosphorylation	77	263	2853	16563	1.6996997357194545	7.974263400140858e-7	1.921260984648616e-5
GO:0009987	Cellular process	2378	13272	2853	16563	1.0401900794126167	8.286480369925155e-7	1.993436201357415e-5
GO:0051966	Regulation of synaptic transmission, glutamatergic	32	79	2853	16563	2.351581945720028	8.625606803149231e-7	2.071854975567415e-5
GO:0033043	Regulation of organelle organization	273	1219	2853	16563	1.3001581168822767	8.873429817476508e-7	2.1281374982340536e-5
GO:0032892	Positive regulation of organic acid transport	23	48	2853	16563	2.7817867157378195	9.003339255201371e-7	2.1560124110062007e-5
GO:0045773	Positive regulation of axon extension	26	58	2853	16563	2.602451140360419	9.028557947999589e-7	2.1587706765801142e-5
GO:0045765	Regulation of angiogenesis	86	304	2853	16563	1.6423363218772484	9.25226482502436e-7	2.208908134059225e-5
GO:1903793	Positive regulation of anion transport	28	65	2853	16563	2.500816953813799	9.414859859018463e-7	2.2443259727466556e-5
GO:0051495	Positive regulation of cytoskeleton organization	62	199	2853	16563	1.8087387515918183	9.462581254093078e-7	2.2522944534855686e-5
GO:0007272	Ensheathment of neurons	44	125	2853	16563	2.0435247108307046	9.563529781861037e-7	2.2694659453732584e-5
GO:0008366	Axon ensheathment	44	125	2853	16563	2.0435247108307046	9.563529781861037e-7	2.2694659453732584e-5
GO:0098868	Bone growth	22	45	2853	16563	2.838228765042645	1.0065453680264995e-6	2.38498276150279e-5
GO:0051931	Regulation of sensory perception	25	55	2853	16563	2.638849058407418	1.0601728637251607e-6	2.5082798519095134e-5
GO:0030111	Regulation of wnt signaling pathway	86	305	2853	16563	1.636951612625192	1.0742582127714715e-6	2.537794101745139e-5
GO:0045956	Positive regulation of calcium ion-dependent exocytosis	16	27	2853	16563	3.440277290960782	1.098887229774998e-6	2.592090730473749e-5
GO:0009611	Response to wounding	95	346	2853	16563	1.5939868589802033	1.1015020211840492e-6	2.5943747904031484e-5
GO:0008347	Glial cell migration	21	42	2853	16563	2.9027339642481595	1.1053876930580188e-6	2.5996408775395826e-5
GO:0036293	Response to decreased oxygen levels	66	217	2853	16563	1.7657183561325211	1.1140556704297519e-6	2.6161214901582118e-5
GO:0048259	Regulation of receptor-mediated endocytosis	41	114	2853	16563	2.0879314479679745	1.170915668043452e-6	2.7455533007977192e-5
GO:0035640	Exploration behavior	17	30	2853	16563	3.289765159481248	1.2097947506385066e-6	2.8325016175053414e-5
GO:0010811	Positive regulation of cell-substrate adhesion	43	122	2853	16563	2.0461895157814896	1.2154169455784746e-6	2.841442850367956e-5
GO:0048713	Regulation of oligodendrocyte differentiation	24	52	2853	16563	2.6794467362290706	1.2338718799375648e-6	2.8803139573594383e-5
GO:0032228	Regulation of synaptic transmission, gabaergic	19	36	2853	16563	3.0639969622619465	1.241578201962612e-6	2.8897411710967322e-5
GO:2000171	Negative regulation of dendrite development	19	36	2853	16563	3.0639969622619465	1.241578201962612e-6	2.8897411710967322e-5
GO:0060047	Heart contraction	33	84	2853	16563	2.2807195433378395	1.332781623700937e-6	3.09743953460998e-5
GO:0060675	Ureteric bud morphogenesis	26	59	2853	16563	2.558341798998378	1.3508560211174175e-6	3.1348215500363985e-5
GO:0051345	Positive regulation of hydrolase activity	129	507	2853	16563	1.4771308930493596	1.4036834387367936e-6	3.252623521202302e-5
GO:0043086	Negative regulation of catalytic activity	154	628	2853	16563	1.423633855077123	1.468113918096144e-6	3.396926726496467e-5
GO:0007507	Heart development	143	575	2853	16563	1.443794632652128	1.5242462467637287e-6	3.5216346202721516e-5
GO:0050714	Positive regulation of protein secretion	85	303	2853	16563	1.628596613604578	1.5558599576926475e-6	3.5894122040063025e-5
GO:0042552	Myelination	43	123	2853	16563	2.029553828661315	1.5603937227194188e-6	3.594608755685655e-5
GO:0072078	Nephron tubule morphogenesis	29	70	2853	16563	2.405122427519904	1.6068776913224893e-6	3.6962878514114546e-5
GO:0007517	Muscle organ development	75	259	2853	16563	1.6811200565143785	1.7431136288976438e-6	4.0038252843353024e-5
GO:0032225	Regulation of synaptic transmission, dopaminergic	12	17	2853	16563	4.09797736129152	1.7517536366348049e-6	4.011974135531195e-5
GO:0060134	Prepulse inhibition	12	17	2853	16563	4.09797736129152	1.7517536366348049e-6	4.011974135531195e-5
GO:0051253	Negative regulation of rna metabolic process	274	1234	2853	16563	1.289058518969199	1.7783857351991042e-6	4.067057188611362e-5
GO:0015698	Inorganic anion transport	38	104	2853	16563	2.1212286661813473	1.8237960820737802e-6	4.1648630239473265e-5
GO:0010558	Negative regulation of macromolecule biosynthetic process	298	1359	2853	16563	1.2730165141220773	1.8874436856510684e-6	4.3039725260208226e-5
GO:0043406	Positive regulation of map kinase activity	66	220	2853	16563	1.7416403785488959	1.8957196093750018e-6	4.316597382214148e-5
GO:0048266	Behavioral response to pain	15	25	2853	16563	3.483280757097792	1.9278460570656235e-6	4.3708014850623067e-5
GO:0007413	Axonal fasciculation	15	25	2853	16563	3.483280757097792	1.9278460570656235e-6	4.3708014850623067e-5
GO:0106030	Neuron projection fasciculation	15	25	2853	16563	3.483280757097792	1.9278460570656235e-6	4.3708014850623067e-5
GO:0060688	Regulation of morphogenesis of a branching structure	28	67	2853	16563	2.4261657014611484	1.9659418813722107e-6	4.444382528663116e-5
GO:0048168	Regulation of neuronal synaptic plasticity	28	67	2853	16563	2.4261657014611484	1.9659418813722107e-6	4.444382528663116e-5
GO:0072171	Mesonephric tubule morphogenesis	26	60	2853	16563	2.5157027690150717	1.9951038445065716e-6	4.5038468879498634e-5
GO:0050679	Positive regulation of epithelial cell proliferation	61	199	2853	16563	1.7795655459209827	2.1048836371851527e-6	4.744871455096774e-5
GO:0007528	Neuromuscular junction development	23	50	2853	16563	2.6705152471083067	2.2040352727937123e-6	4.954205961970118e-5
GO:0060351	Cartilage development involved in endochondral bone morphogenesis	23	50	2853	16563	2.6705152471083067	2.2040352727937123e-6	4.954205961970118e-5
GO:0031099	Regeneration	36	97	2853	16563	2.154606653874923	2.2122233391692717e-6	4.965527514998606e-5
GO:0006469	Negative regulation of protein kinase activity	60	195	2853	16563	1.7862978241527139	2.2185541827459136e-6	4.9726540906866794e-5
GO:0051493	Regulation of cytoskeleton organization	130	516	2853	16563	1.462617888962251	2.2266568766562558e-6	4.981406797704146e-5
GO:0007274	Neuromuscular synaptic transmission	18	34	2853	16563	3.0734830209686397	2.2351047826215847e-6	4.981406797704146e-5
GO:1905144	Response to acetylcholine	18	34	2853	16563	3.0734830209686397	2.2351047826215847e-6	4.981406797704146e-5
GO:1905145	Cellular response to acetylcholine	18	34	2853	16563	3.0734830209686397	2.2351047826215847e-6	4.981406797704146e-5
GO:0072657	Protein localization to membrane	107	407	2853	16563	1.5262532391869932	2.2435079366472443e-6	4.993072677648394e-5
GO:0001656	Metanephros development	32	82	2853	16563	2.265548459901003	2.2771765129504518e-6	5.060856179768726e-5
GO:0071705	Nitrogen compound transport	258	1156	2853	16563	1.2956840186436425	2.404336936909312e-6	5.335934804912681e-5
GO:0042752	Regulation of circadian rhythm	42	121	2853	16563	2.015121099147483	2.5385008939952185e-6	5.6021922109338564e-5
GO:0045995	Regulation of embryonic development	43	125	2853	16563	1.997080967402734	2.5392110747668506e-6	5.6021922109338564e-5
GO:0015849	Organic acid transport	64	213	2853	16563	1.744365950346312	2.54336260386203e-6	5.6021922109338564e-5
GO:0046942	Carboxylic acid transport	64	213	2853	16563	1.744365950346312	2.54336260386203e-6	5.6021922109338564e-5
GO:0050881	Musculoskeletal movement	22	47	2853	16563	2.717453072913171	2.545642966953507e-6	5.6021922109338564e-5
GO:0050879	Multicellular organismal movement	22	47	2853	16563	2.717453072913171	2.545642966953507e-6	5.6021922109338564e-5
GO:0002028	Regulation of sodium ion transport	34	90	2853	16563	2.1931767729874982	2.642960274169621e-6	5.800156690820434e-5
GO:0061326	Renal tubule development	34	90	2853	16563	2.1931767729874982	2.642960274169621e-6	5.800156690820434e-5
GO:0010594	Regulation of endothelial cell migration	51	158	2853	16563	1.8739168629956473	2.7059397139808415e-6	5.930110163170531e-5
GO:0019219	Regulation of nucleobase-containing compound metabolic process	636	3177	2853	16563	1.1621899913514824	2.7222929529811437e-6	5.957662508350539e-5
GO:0046888	Negative regulation of hormone secretion	35	94	2853	16563	2.161610398908204	2.793879134490209e-6	6.1022775643054105e-5
GO:0008542	Visual learning	28	68	2853	16563	2.39048679408672	2.796118805247513e-6	6.1022775643054105e-5
GO:0032890	Regulation of organic acid transport	31	79	2853	16563	2.278095009916277	2.844005571172422e-6	6.193815826194824e-5
GO:0051930	Regulation of sensory perception of pain	24	54	2853	16563	2.5802079682205865	2.8459241341404154e-6	6.193815826194824e-5
GO:2000113	Negative regulation of cellular macromolecule biosynthetic process	290	1324	2853	16563	1.2715904072990427	2.8965882156609136e-6	6.295384898506071e-5
GO:0050673	Epithelial cell proliferation	36	98	2853	16563	2.1326208716925255	2.9220578191532714e-6	6.333268921100151e-5
GO:0007200	Phospholipase c-activating g protein-coupled receptor signaling pathway	36	98	2853	16563	2.1326208716925255	2.9220578191532714e-6	6.333268921100151e-5
GO:0043409	Negative regulation of mapk cascade	54	171	2853	16563	1.8333056616304169	2.9519952827999556e-6	6.389366713060288e-5
GO:0072028	Nephron morphogenesis	29	72	2853	16563	2.3383134711999065	3.1824604165852595e-6	6.869319011525197e-5
GO:0072088	Nephron epithelium morphogenesis	29	72	2853	16563	2.3383134711999065	3.1824604165852595e-6	6.869319011525197e-5
GO:0090090	Negative regulation of canonical wnt signaling pathway	43	126	2853	16563	1.9812311184550935	3.2190648194904378e-6	6.938824125952234e-5
GO:0043009	Chordate embryonic development	190	815	2853	16563	1.3534219710604918	3.3225860190798387e-6	7.151921330324845e-5
GO:0061351	Neural precursor cell proliferation	33	87	2853	16563	2.2020740418434315	3.3270028147033773e-6	7.151921330324845e-5
GO:0062012	Regulation of small molecule metabolic process	96	359	2853	16563	1.552437106227428	3.3793542196454982e-6	7.254561912664049e-5
GO:0016079	Synaptic vesicle exocytosis	25	58	2853	16563	2.5023568657311723	3.517510580998572e-6	7.54087268364551e-5
GO:0051252	Regulation of rna metabolic process	580	2877	2853	16563	1.1703758771386392	3.5879772093799748e-6	7.676447194161852e-5
GO:0060079	Excitatory postsynaptic potential	19	38	2853	16563	2.9027339642481595	3.5904941182314427e-6	7.676447194161852e-5
GO:0032103	Positive regulation of response to external stimulus	85	309	2853	16563	1.5969733783889555	3.6689966578314475e-6	7.833655872283215e-5
GO:0097435	Supramolecular fiber organization	111	430	2853	16563	1.498620790844399	3.6907882731172755e-6	7.869519732003912e-5
GO:0045686	Negative regulation of glial cell differentiation	18	35	2853	16563	2.9856692203695356	3.861385418504538e-6	8.222141897212973e-5
GO:0043279	Response to alkaloid	31	80	2853	16563	2.249618822292324	3.882966670204449e-6	8.256937357950269e-5
GO:0009792	Embryo development ending in birth or egg hatching	193	832	2853	16563	1.3467010939901318	3.902027075541637e-6	8.278993033391926e-5
GO:0007213	G protein-coupled acetylcholine receptor signaling pathway	10	13	2853	16563	4.4657445603817845	3.903847067214699e-6	8.278993033391926e-5
GO:0045598	Regulation of fat cell differentiation	45	135	2853	16563	1.9351559761654396	3.943168483366713e-6	8.351143251667916e-5
GO:0051640	Organelle localization	118	464	2853	16563	1.4763905507813917	4.017942125310509e-6	8.495051710094006e-5
GO:0095500	Acetylcholine receptor signaling pathway	17	32	2853	16563	3.0841548370136698	4.027291760766784e-6	8.495051710094006e-5
GO:1903831	Signal transduction involved in cellular response to ammonium ion	17	32	2853	16563	3.0841548370136698	4.027291760766784e-6	8.495051710094006e-5
GO:0031589	Cell-substrate adhesion	51	160	2853	16563	1.8504929022082017	4.073877902776753e-6	8.581830763910868e-5
GO:0035690	Cellular response to drug	95	356	2853	16563	1.5492119472110963	4.170821954810313e-6	8.774317962876648e-5
GO:0072080	Nephron tubule development	32	84	2853	16563	2.21160682990336	4.185195216485541e-6	8.79281613682169e-5
GO:0099072	Regulation of postsynaptic membrane neurotransmitter receptor levels	26	62	2853	16563	2.4345510667887793	4.195478304493819e-6	8.802683308110401e-5
GO:0021795	Cerebral cortex cell migration	24	55	2853	16563	2.533295096071121	4.228441246719985e-6	8.860046372947713e-5
GO:0010638	Positive regulation of organelle organization	142	581	2853	16563	1.418892333642818	4.542942665223878e-6	9.506394100389462e-5
GO:0010464	Regulation of mesenchymal cell proliferation	21	45	2853	16563	2.7092183666316156	4.562313247667239e-6	9.534266557492399e-5
GO:0032956	Regulation of actin cytoskeleton organization	89	329	2853	16563	1.570476126553716	4.598328627836346e-6	9.596803203816861e-5
GO:0051928	Positive regulation of calcium ion transport	45	136	2853	16563	1.9209268881053998	4.920868976483254e-6	1.0256366727836856e-4
GO:1901701	Cellular response to oxygen-containing compound	233	1038	2853	16563	1.3031541689206576	4.9617165373346445e-6	1.0327842467474503e-4
GO:0072178	Nephric duct morphogenesis	9	11	2853	16563	4.749928305133353	5.19435155317711e-6	1.0797809686465927e-4
GO:0042755	Eating behavior	20	42	2853	16563	2.7645085373791995	5.217769395831823e-6	1.0832199258250598e-4
GO:0043525	Positive regulation of neuron apoptotic process	31	81	2853	16563	2.221845750412172	5.26070107038656e-6	1.0906956153431714e-4
GO:0071241	Cellular response to inorganic substance	65	222	2853	16563	1.6997991682534268	5.5741125480917065e-6	1.1541562604504732e-4
GO:0048486	Parasympathetic nervous system development	13	21	2853	16563	3.5938610985929595	5.8610203695243184e-6	1.2119697895353633e-4
GO:0030323	Respiratory tube development	64	218	2853	16563	1.7043575569897453	5.954596006579644e-6	1.2297060193404384e-4
GO:0021545	Cranial nerve development	22	49	2853	16563	2.6065366209575314	5.9885589245012735e-6	1.2351010860388293e-4
GO:1903034	Regulation of response to wounding	55	179	2853	16563	1.783802994789372	6.0423735978932655e-6	1.244570990614434e-4
GO:0030178	Negative regulation of wnt signaling pathway	51	162	2853	16563	1.8276473108229154	6.063221783455685e-6	1.2472347995027576e-4
GO:0072347	Response to anesthetic	24	56	2853	16563	2.48805768364128	6.197429458995189e-6	1.2731798694313846e-4
GO:0022607	Cellular component assembly	429	2072	2853	16563	1.2020008404077807	6.331266220634861e-6	1.2989812739393685e-4
GO:0021700	Developmental maturation	72	254	2853	16563	1.645644452172185	6.3999767196323445e-6	1.3113710425389708e-4
GO:0090277	Positive regulation of peptide hormone secretion	41	121	2853	16563	1.9671420253582572	6.599996909973376e-6	1.3502548128514492e-4
GO:0048663	Neuron fate commitment	30	78	2853	16563	2.2328722801908922	6.6068824059685684e-6	1.3502548128514492e-4
GO:0060828	Regulation of canonical wnt signaling pathway	67	232	2853	16563	1.6765791000398853	6.718290068075169e-6	1.3712447746458607e-4
GO:0051580	Regulation of neurotransmitter uptake	14	24	2853	16563	3.38652295828952	6.802560693081283e-6	1.3866487560269312e-4
GO:2000179	Positive regulation of neural precursor cell proliferation	27	67	2853	16563	2.339516926408965	6.8118720074327675e-6	1.3867528064743942e-4
GO:0050728	Negative regulation of inflammatory response	48	150	2853	16563	1.857749737118822	6.853765111535046e-6	1.393480991773648e-4
GO:0021871	Forebrain regionalization	15	27	2853	16563	3.225259960275733	7.243233348779739e-6	1.4707684004732264e-4
GO:0072089	Stem cell proliferation	25	60	2853	16563	2.4189449702068	7.336021140527954e-6	1.487692215074633e-4
GO:0034613	Cellular protein localization	282	1297	2853	16563	1.262252857236671	7.410476121076623e-6	1.5008595403573824e-4
GO:0061001	Regulation of dendritic spine morphogenesis	23	53	2853	16563	2.51935400670595	7.475836615221737e-6	1.5102148403339604e-4
GO:0060443	Mammary gland morphogenesis	23	53	2853	16563	2.51935400670595	7.475836615221737e-6	1.5102148403339604e-4
GO:0030324	Lung development	63	215	2853	16563	1.70113711393148	7.501397225483773e-6	1.513438106042866e-4
GO:0009612	Response to mechanical stimulus	54	176	2853	16563	1.7812231144250072	7.662070224203238e-6	1.5438777560456576e-4
GO:0070167	Regulation of biomineral tissue development	33	90	2853	16563	2.1286715737819835	7.80695781252022e-6	1.5710630172654036e-4
GO:0071902	Positive regulation of protein serine/threonine kinase activity	77	278	2853	16563	1.6079893183245202	7.879477435955347e-6	1.5836342596728113e-4
GO:0110020	Regulation of actomyosin structure organization	35	98	2853	16563	2.0733814030343996	8.269802230457689e-6	1.659965270641042e-4
GO:0032231	Regulation of actin filament bundle assembly	36	102	2853	16563	2.04898868064576	8.40571105259895e-6	1.6850990974020568e-4
GO:0032233	Positive regulation of actin filament bundle assembly	26	64	2853	16563	2.3584713459516298	8.431688980061704e-6	1.688159126541706e-4
GO:0043266	Regulation of potassium ion transport	38	110	2853	16563	2.0055252843896376	8.506612196543045e-6	1.7009985835143244e-4
GO:0098801	Regulation of renal system process	19	40	2853	16563	2.7575972660357517	9.38547443788762e-6	1.8719863381999396e-4
GO:0006687	Glycosphingolipid metabolic process	19	40	2853	16563	2.7575972660357517	9.38547443788762e-6	1.8719863381999396e-4
GO:0045471	Response to ethanol	31	83	2853	16563	2.1683072985950114	9.444317736853028e-6	1.8813415243943508e-4
GO:0009100	Glycoprotein metabolic process	76	275	2853	16563	1.60442022751171	9.8108779019222e-6	1.9518939785427792e-4
GO:0008593	Regulation of notch signaling pathway	32	87	2853	16563	2.135344525423934	9.887990761912379e-6	1.9647549865757044e-4
GO:0007623	Circadian rhythm	43	131	2853	16563	1.9056116101171128	9.937494715994514e-6	1.972104587404604e-4
GO:0015893	Drug transport	42	127	2853	16563	1.9199185275342159	1.0187684696215452e-5	2.0192119214876338e-4
GO:0031667	Response to nutrient levels	93	354	2853	16563	1.525165303249033	1.0433461867487508e-5	2.0653273699246314e-4
GO:2001025	Positive regulation of response to drug	18	37	2853	16563	2.8242816949441556	1.0593552361300184e-5	2.094386506361443e-4
GO:0031329	Regulation of cellular catabolic process	164	699	2853	16563	1.362084034725889	1.073673727034392e-5	2.1200347013635232e-4
GO:0045933	Positive regulation of muscle contraction	23	54	2853	16563	2.4726993028780617	1.0910932972153161e-5	2.149044635527717e-4
GO:0098815	Modulation of excitatory postsynaptic potential	23	54	2853	16563	2.4726993028780617	1.0910932972153161e-5	2.149044635527717e-4
GO:0060402	Calcium ion transport into cytosol	29	76	2853	16563	2.2152443411367537	1.1215673234389213e-5	2.2063091529871514e-4
GO:0070727	Cellular macromolecule localization	282	1304	2853	16563	1.2554769599969033	1.1476125491571334e-5	2.2547295432754304e-4
GO:0003417	Growth plate cartilage development	17	34	2853	16563	2.90273396424816	1.1713522494366766e-5	2.2985052794985945e-4
GO:0003151	Outflow tract morphogenesis	30	80	2853	16563	2.17705047318612	1.192731527743161e-5	2.337546104807088e-4
GO:0021516	Dorsal spinal cord development	13	22	2853	16563	3.4305037759296435	1.206219793680497e-5	2.3581148001269961e-4
GO:0099170	Postsynaptic modulation of chemical synaptic transmission	13	22	2853	16563	3.4305037759296435	1.206219793680497e-5	2.3581148001269961e-4
GO:0051146	Striated muscle cell differentiation	63	218	2853	16563	1.6777269701617805	1.2188662017298908e-5	2.37988534580643e-4
GO:0048013	Ephrin receptor signaling pathway	16	31	2853	16563	2.9963705437400363	1.261333664280963e-5	2.4597567509993977e-4
GO:0031333	Negative regulation of protein complex assembly	42	128	2853	16563	1.9049191640378549	1.2666636057021337e-5	2.467097457978804e-4
GO:0001504	Neurotransmitter uptake	14	25	2853	16563	3.2510620399579393	1.3006742957101286e-5	2.5270930798402586e-4
GO:0060004	Reflex	14	25	2853	16563	3.2510620399579393	1.3006742957101286e-5	2.5270930798402586e-4
GO:0051957	Positive regulation of amino acid transport	15	28	2853	16563	3.1100721045516	1.3116101855124425e-5	2.54520217895561e-4
GO:0006112	Energy reserve metabolic process	22	51	2853	16563	2.5043194985670403	1.3209985839049009e-5	2.5602674891254024e-4
GO:0002027	Regulation of heart rate	33	92	2853	16563	2.0823961047867234	1.3355027954335119e-5	2.585198715927008e-4
GO:1901137	Carbohydrate derivative biosynthetic process	114	456	2853	16563	1.45136698212408	1.3434966091557077e-5	2.597481726437606e-4
GO:0042593	Glucose homeostasis	59	201	2853	16563	1.7040925760262828	1.3588052246009923e-5	2.62080427088183e-4
GO:0003014	Renal system process	34	96	2853	16563	2.05610322467578	1.3605495294671173e-5	2.62080427088183e-4
GO:0072009	Nephron epithelium development	34	96	2853	16563	2.05610322467578	1.3605495294671173e-5	2.62080427088183e-4
GO:1905477	Positive regulation of protein localization to membrane	36	104	2853	16563	2.009585052171803	1.3808368206648037e-5	2.656635626766216e-4
GO:0030500	Regulation of bone mineralization	28	73	2853	16563	2.2267548218889996	1.410518935643891e-5	2.7104325449927793e-4
GO:0009991	Response to extracellular stimulus	99	385	2853	16563	1.492834610184768	1.4434086873216485e-5	2.770254651172621e-4
GO:0060541	Respiratory system development	69	246	2853	16563	1.6283629555538457	1.4525032574627893e-5	2.7843179839222835e-4
GO:0021955	Central nervous system neuron axonogenesis	19	41	2853	16563	2.690338796132441	1.4676095293531048e-5	2.80644700898263e-4
GO:0030501	Positive regulation of bone mineralization	19	41	2853	16563	2.690338796132441	1.4676095293531048e-5	2.80644700898263e-4
GO:0050709	Negative regulation of protein secretion	47	150	2853	16563	1.8190466175955133	1.5833944418952983e-5	3.0233701870491247e-4
GO:0002062	Chondrocyte differentiation	30	81	2853	16563	2.1501733068504887	1.5848853046281506e-5	3.0233701870491247e-4
GO:0001658	Branching involved in ureteric bud morphogenesis	21	48	2853	16563	2.53989221871714	1.5896806639064793e-5	3.0288510545555496e-4
GO:0045934	Negative regulation of nucleobase-containing compound metabolic process	293	1367	2853	16563	1.2443321895021373	1.592763501266255e-5	3.031059720948355e-4
GO:0033500	Carbohydrate homeostasis	59	202	2853	16563	1.6956564741647668	1.6017619951449507e-5	3.044507087756211e-4
GO:0034330	Cell junction organization	53	176	2853	16563	1.7482375011949145	1.667790820048455e-5	3.166190355602832e-4
GO:0070302	Regulation of stress-activated protein kinase signaling cascade	67	238	2853	16563	1.6343124000388798	1.6877779587523508e-5	3.1999407983105506e-4
GO:1903539	Protein localization to postsynaptic membrane	18	38	2853	16563	2.749958492445625	1.6896304780062054e-5	3.1999407983105506e-4
GO:0003073	Regulation of systemic arterial blood pressure	39	117	2853	16563	1.9351559761654398	1.692054270328034e-5	3.20068417017513e-4
GO:0060993	Kidney morphogenesis	32	89	2853	16563	2.087359255189688	1.6970902540183125e-5	3.20636104707033e-4
GO:0042472	Inner ear morphogenesis	38	113	2853	16563	1.9522812502907976	1.721528420342234e-5	3.248637523273363e-4
GO:0045834	Positive regulation of lipid metabolic process	49	159	2853	16563	1.7891064685303124	1.7369812393647246e-5	3.2738771996016706e-4
GO:0072176	Nephric duct development	9	12	2853	16563	4.35410094637224	1.7576461551532924e-5	3.3008351054809203e-4
GO:1902287	Semaphorin-plexin signaling pathway involved in axon guidance	9	12	2853	16563	4.35410094637224	1.7576461551532924e-5	3.3008351054809203e-4
GO:1904950	Negative regulation of establishment of protein localization	60	207	2853	16563	1.6827443271003826	1.7595582342980373e-5	3.3008351054809203e-4
GO:0009914	Hormone transport	35	101	2853	16563	2.0117958168056553	1.759663317004489e-5	3.3008351054809203e-4
GO:0048880	Sensory system development	98	382	2853	16563	1.489360882179684	1.7618274738617432e-5	3.3009649828346597e-4
GO:0009894	Regulation of catabolic process	187	821	2853	16563	1.3223172991824748	1.7838824167218387e-5	3.3383177244995267e-4
GO:0030850	Prostate gland development	20	45	2853	16563	2.5802079682205865	1.8991526424031924e-5	3.5373282842854256e-4
GO:0106027	Neuron projection organization	20	45	2853	16563	2.5802079682205865	1.8991526424031924e-5	3.5373282842854256e-4
GO:0019098	Reproductive behavior	20	45	2853	16563	2.5802079682205865	1.8991526424031924e-5	3.5373282842854256e-4
GO:0060048	Cardiac muscle contraction	28	74	2853	16563	2.1966635405121213	1.8992065294824334e-5	3.5373282842854256e-4
GO:0009582	Detection of abiotic stimulus	41	126	2853	16563	1.8890808338757867	1.9999368684672055e-5	3.7205437115038676e-4
GO:0003206	Cardiac chamber morphogenesis	46	147	2853	16563	1.8166770388491884	2.0129796818496994e-5	3.740391609304919e-4
GO:1903035	Negative regulation of response to wounding	30	82	2853	16563	2.12395168115719	2.091114365137337e-5	3.8809998882766806e-4
GO:0032872	Regulation of stress-activated mapk cascade	66	235	2853	16563	1.6304718437479024	2.1096257574416426e-5	3.9107497717656426e-4
GO:0042220	Response to cocaine	19	42	2853	16563	2.6262831105102395	2.248949494815223e-5	4.1641242291190917e-4
GO:0060740	Prostate gland epithelium morphogenesis	15	29	2853	16563	3.002828238877407	2.284584844495252e-5	4.220187971244043e-4
GO:0043951	Negative regulation of camp-mediated signaling	15	29	2853	16563	3.002828238877407	2.284584844495252e-5	4.220187971244043e-4
GO:0042471	Ear morphogenesis	43	135	2853	16563	1.8491490438914202	2.2914962756187826e-5	4.227998456080229e-4
GO:0051590	Positive regulation of neurotransmitter transport	21	49	2853	16563	2.4880576836412795	2.3327992424987674e-5	4.290463934906468e-4
GO:0051955	Regulation of amino acid transport	21	49	2853	16563	2.4880576836412795	2.3327992424987674e-5	4.290463934906468e-4
GO:0048485	Sympathetic nervous system development	13	23	2853	16563	3.2813514378457462	2.3362429752806686e-5	4.290463934906468e-4
GO:0099149	Regulation of postsynaptic neurotransmitter receptor internalization	13	23	2853	16563	3.2813514378457462	2.3362429752806686e-5	4.290463934906468e-4
GO:0044331	Cell-cell adhesion mediated by cadherin	14	26	2853	16563	3.126021192267249	2.3713284058757193e-5	4.344769964114385e-4
GO:0050927	Positive regulation of positive chemotaxis	14	26	2853	16563	3.126021192267249	2.3713284058757193e-5	4.344769964114385e-4
GO:0042060	Wound healing	68	245	2853	16563	1.6113135475010192	2.422692298548098e-5	4.43372387319656e-4
GO:0009581	Detection of external stimulus	41	127	2853	16563	1.8742061816405442	2.4677031981494385e-5	4.5108583866868565e-4
GO:0021800	Cerebral cortex tangential migration	8	10	2853	16563	4.644374342797056	2.4841133917080602e-5	4.5355938253932685e-4
GO:0050731	Positive regulation of peptidyl-tyrosine phosphorylation	57	196	2853	16563	1.6883248567565827	2.538637569382972e-5	4.629781502403645e-4
GO:0060685	Regulation of prostatic bud formation	6	6	2853	16563	5.80546792849632	2.6006694028059132e-05	4.731957018477226e-4
GO:0090325	Regulation of locomotion involved in locomotory behavior	6	6	2853	16563	5.80546792849632	2.6006694028059132e-05	4.731957018477226e-4
GO:2000463	Positive regulation of excitatory postsynaptic potential	18	39	2853	16563	2.6794467362290706	2.6344666896014056e-5	4.7769035245166113e-4
GO:0060251	Regulation of glial cell proliferation	18	39	2853	16563	2.6794467362290706	2.6344666896014056e-5	4.7769035245166113e-4
GO:0040019	Positive regulation of embryonic development	18	39	2853	16563	2.6794467362290706	2.6344666896014056e-5	4.7769035245166113e-4
GO:0030855	Epithelial cell differentiation	119	487	2853	16563	1.418584565690066	2.673320565299122e-5	4.841783005450375e-4
GO:0051492	Regulation of stress fiber assembly	31	87	2853	16563	2.0686150090044357	2.80291855415297e-5	5.07067596530291e-4
GO:0110053	Regulation of actin filament organization	66	237	2853	16563	1.6167125876825192	2.8254676163564596e-5	5.105607021895497e-4
GO:0097154	Gabaergic neuron differentiation	10	15	2853	16563	3.87031195233088	2.9247613569019963e-5	5.278976483471335e-4
GO:0003007	Heart morphogenesis	74	274	2853	16563	1.5679000974771082	3.0001211140924022e-5	5.408799587500456e-4
GO:0071417	Cellular response to organonitrogen compound	121	498	2853	16563	1.410565500698905	3.013997673803372e-5	5.427607010985112e-4
GO:0055119	Relaxation of cardiac muscle	7	8	2853	16563	5.07978443743428	3.0394039947692663e-5	5.467110587394901e-4
GO:0016339	Calcium-dependent cell-cell adhesion via plasma membrane cell adhesion molecules	17	36	2853	16563	2.741470966234373	3.0446273451617272e-5	5.470261468382365e-4
GO:0032388	Positive regulation of intracellular transport	58	202	2853	16563	1.6669165339246859	3.2560834277773655e-5	5.836872192433214e-4
GO:0051224	Negative regulation of protein transport	58	202	2853	16563	1.6669165339246859	3.2560834277773655e-5	5.836872192433214e-4
GO:0043588	Skin development	62	220	2853	16563	1.6360864162125992	3.30221348395434e-5	5.906126886114475e-4
GO:0070374	Positive regulation of erk1 and erk2 cascade	62	220	2853	16563	1.6360864162125992	3.30221348395434e-5	5.906126886114475e-4
GO:1903829	Positive regulation of cellular protein localization	79	298	2853	16563	1.5390334441315747	3.341236774727816e-5	5.969146015803422e-4
GO:0043254	Regulation of protein complex assembly	109	441	2853	16563	1.4349115741634895	3.456678589860596e-5	6.151219920758397e-4
GO:0043950	Positive regulation of camp-mediated signaling	16	33	2853	16563	2.8147723289679125	3.458768071201333e-5	6.151219920758397e-4
GO:0007405	Neuroblast proliferation	16	33	2853	16563	2.8147723289679125	3.458768071201333e-5	6.151219920758397e-4
GO:0001659	Temperature homeostasis	16	33	2853	16563	2.8147723289679125	3.458768071201333e-5	6.151219920758397e-4
GO:0050727	Regulation of inflammatory response	90	350	2853	16563	1.4928346101847678	3.472637281776633e-5	6.168922846556303e-4
GO:0043271	Negative regulation of ion transport	52	176	2853	16563	1.7152518879648218	3.5370552823193576e-5	6.276281540935374e-4
GO:0032024	Positive regulation of insulin secretion	31	88	2853	16563	2.0451080202657494	3.620556125777358e-5	6.417221920570733e-4
GO:0150063	Visual system development	96	379	2853	16563	1.4705143037879858	3.65638668704137e-5	6.473447755922569e-4
GO:1901615	Organic hydroxy compound metabolic process	92	360	2853	16563	1.4836195817268372	3.680584767349909e-5	6.508975777680417e-4
GO:0007620	Copulation	11	18	2853	16563	3.5477859563033065	3.760137469879372e-5	6.605182398315415e-4
GO:0033604	Negative regulation of catecholamine secretion	11	18	2853	16563	3.5477859563033065	3.760137469879372e-5	6.605182398315415e-4
GO:0021542	Dentate gyrus development	11	18	2853	16563	3.5477859563033065	3.760137469879372e-5	6.605182398315415e-4
GO:0021783	Preganglionic parasympathetic fiber development	11	18	2853	16563	3.5477859563033065	3.760137469879372e-5	6.605182398315415e-4
GO:0022038	Corpus callosum development	11	18	2853	16563	3.5477859563033065	3.760137469879372e-5	6.605182398315415e-4
GO:0090036	Regulation of protein kinase c signaling	11	18	2853	16563	3.5477859563033065	3.760137469879372e-5	6.605182398315415e-4
GO:0060512	Prostate gland morphogenesis	15	30	2853	16563	2.90273396424816	3.842788009502414e-5	6.727867851747726e-4
GO:0003009	Skeletal muscle contraction	15	30	2853	16563	2.90273396424816	3.842788009502414e-5	6.727867851747726e-4
GO:0001706	Endoderm formation	15	30	2853	16563	2.90273396424816	3.842788009502414e-5	6.727867851747726e-4
GO:0001654	Eye development	95	375	2853	16563	1.4707185418857343	3.9819131163893257e-5	6.96370754438919e-4
GO:0016310	Phosphorylation	188	837	2853	16563	1.3039760699609415	4.001411456387107e-5	6.990048815775127e-4
GO:0034332	Adherens junction organization	26	69	2853	16563	2.1875676252304976	4.0530937946496465e-5	7.072491575004926e-4
GO:0014070	Response to organic cyclic compound	154	665	2853	16563	1.3444241518623055	4.061605388726351e-5	7.079503994486849e-4
GO:0030901	Midbrain development	20	47	2853	16563	2.470411884466519	4.1166904085281965e-5	7.167590140019757e-4
GO:0007015	Actin filament organization	59	208	2853	16563	1.646743306640783	4.12387276016321e-5	7.172170318089591e-4
GO:0050926	Regulation of positive chemotaxis	14	27	2853	16563	3.0102426295906843	4.1450261746425354e-5	7.17727224547719e-4
GO:0002052	Positive regulation of neuroblast proliferation	14	27	2853	16563	3.0102426295906843	4.1450261746425354e-5	7.17727224547719e-4
GO:0035335	Peptidyl-tyrosine dephosphorylation	14	27	2853	16563	3.0102426295906843	4.1450261746425354e-5	7.17727224547719e-4
GO:0048521	Negative regulation of behavior	14	27	2853	16563	3.0102426295906843	4.1450261746425354e-5	7.17727224547719e-4
GO:0007190	Activation of adenylate cyclase activity	12	21	2853	16563	3.3174102448550395	4.1967982466657616e-5	7.250981356657062e-4
GO:0006688	Glycosphingolipid biosynthetic process	12	21	2853	16563	3.3174102448550395	4.1967982466657616e-5	7.250981356657062e-4
GO:0048813	Dendrite morphogenesis	27	73	2853	16563	2.1472278639643925	4.262061194100158e-5	7.355673410233976e-4
GO:0098900	Regulation of action potential	23	58	2853	16563	2.3021683164726783	4.361205975229253e-5	7.510330333517743e-4
GO:0035725	Sodium ion transmembrane transport	23	58	2853	16563	2.3021683164726783	4.361205975229253e-5	7.510330333517743e-4
GO:0002064	Epithelial cell development	62	222	2853	16563	1.6213468989494229	4.4350341798765696e-5	7.624749746103427e-4
GO:0043547	Positive regulation of gtpase activity	58	204	2853	16563	1.65057421496464	4.437326595910923e-5	7.624749746103427e-4
GO:0043434	Response to peptide hormone	72	268	2853	16563	1.5596779509393097	4.593909867128753e-5	7.885211086748122e-4
GO:0120161	Regulation of cold-induced thermogenesis	44	143	2853	16563	1.786297824152714	4.7529449150104396e-5	8.149309360807345e-4
GO:1902285	Semaphorin-plexin signaling pathway involved in neuron projection guidance	9	13	2853	16563	4.019170104343606	4.833984414124883e-5	8.279249175365845e-4
GO:0007162	Negative regulation of cell adhesion	76	287	2853	16563	1.5373364549328232	4.857648306452785e-5	8.310745316479535e-4
GO:0048706	Embryonic skeletal system development	43	139	2853	16563	1.7959361217650487	5.004835816319477e-5	8.553275266566811e-4
GO:0051648	Vesicle localization	54	187	2853	16563	1.6764452841647126	5.054365710526697e-5	8.628563434536204e-4
GO:0002573	Myeloid leukocyte differentiation	38	118	2853	16563	1.8695574684988148	5.1121613190952e-5	8.717784188850982e-4
GO:0007492	Endoderm development	25	66	2853	16563	2.1990408820061815	5.118688059861419e-5	8.719477595593122e-4
GO:1904375	Regulation of protein localization to cell periphery	42	135	2853	16563	1.8061455777544104	5.260293460883739e-5	8.95101987722949e-4
GO:0061035	Regulation of cartilage development	26	70	2853	16563	2.1563166591557756	5.400872654762059e-5	9.180318276276782e-4
GO:1900006	Positive regulation of dendrite development	36	110	2853	16563	1.899971322053341	5.4520508901085775e-5	9.247359082394064e-4
GO:0021782	Glial cell development	36	110	2853	16563	1.899971322053341	5.4520508901085775e-5	9.247359082394064e-4
GO:0048678	Response to axon injury	16	34	2853	16563	2.7319849075276803	5.4920265794365564e-5	9.305146538944281e-4
GO:0019216	Regulation of lipid metabolic process	87	340	2853	16563	1.4855167934681759	5.6296820769457354e-5	9.528131094138986e-4
GO:0035270	Endocrine system development	40	127	2853	16563	1.8284938357468723	5.774810824073464e-5	9.752807519284628e-4
GO:1901343	Negative regulation of vasculature development	40	127	2853	16563	1.8284938357468723	5.774810824073464e-5	9.752807519284628e-4
GO:0006942	Regulation of striated muscle contraction	29	82	2853	16563	2.053153291785284	5.879092568753486e-5	9.918293533816775e-4
GO:0046879	Hormone secretion	32	94	2853	16563	1.9763295075732152	5.897632366419259e-5	9.938929753761311e-4
GO:0048701	Embryonic cranial skeleton morphogenesis	20	48	2853	16563	2.4189449702068	5.921697368972248e-5	9.958184145453118e-4
GO:0090659	Walking behavior	20	48	2853	16563	2.4189449702068	5.921697368972248e-5	9.958184145453118e-4
GO:0043010	Camera-type eye development	85	331	2853	16563	1.4908301326954296	5.9524030374344114e-5	9.999148684526017e-4
